# Supplementary material for: Prosurvival long noncoding RNA PINCR regulates a subset of p53 targets in human colorectal cancer cells by binding to Matrin 3
Source: eLife journal article supplement (doi:10.7554/elife.23244), 2017-06-05
Supplement: supp [file elife-23244-supp-v1.zip]

A

PINCER

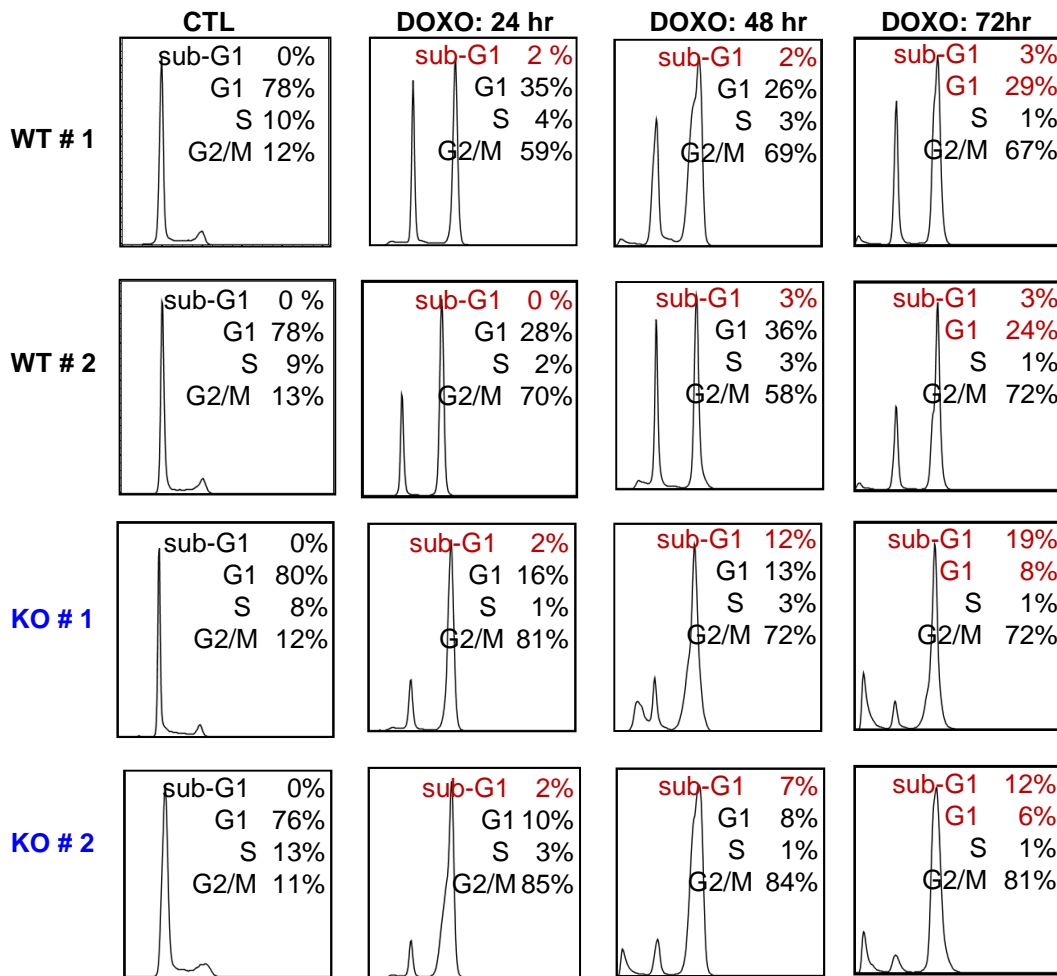

B

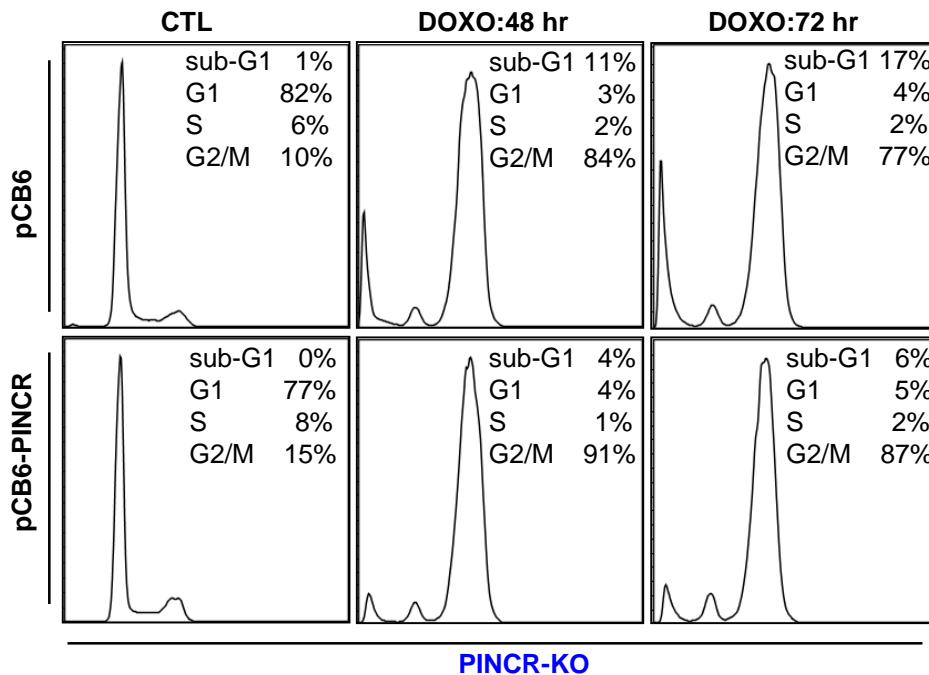

**Figure 2 – figure supplement 3.** (A) Raw cell cycle profiles corresponding to the data in Figure 2B and 2C are shown. (B) Raw cell cycle profiles corresponding to a representative experiment for Figure 2E are shown.
