# Supplementary material for: Prosurvival long noncoding RNA PINCR regulates a subset of p53 targets in human colorectal cancer cells by binding to Matrin 3
Source: eLife journal article supplement (doi:10.7554/elife.23244), 2017-06-05
Supplement: supp [file elife-23244-supp-v1.zip]

**A**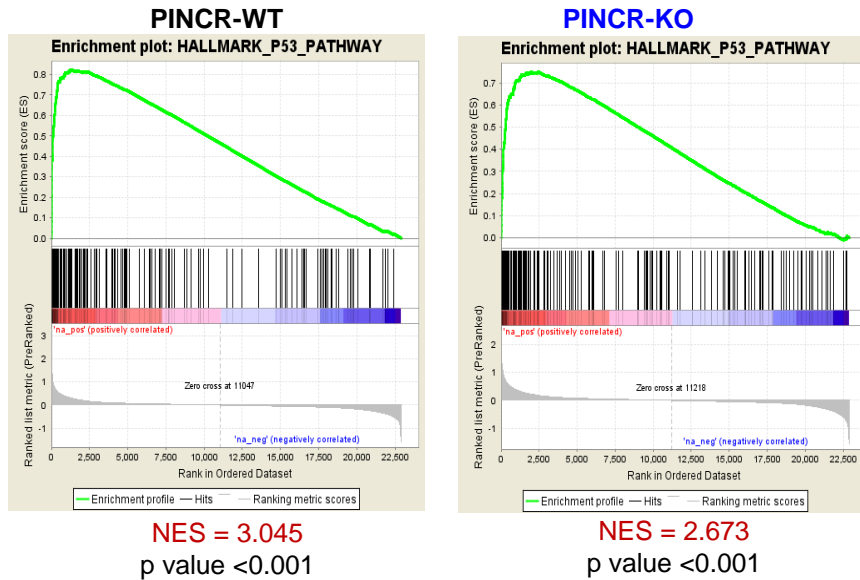**B**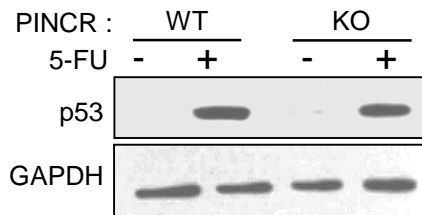

**Figure 4 – figure supplement 1. Loss of *PINCR* results in impaired induction of a subset of p53 targets without altering induction of p53 levels.** (A) Gene set enrichment analysis (GSEA) for the genes upregulated in the microarrays performed in biological triplicates from untreated or 5-FU treated *PINCR*-WT and *PINCR*-KO cells. (B) *PINCR*-WT and *PINCR*-KO cells were untreated or treated with 5-FU for 24 hr and immunoblotting for p53 and loading control GAPDH was performed.
