# Supplementary material for: Prosurvival long noncoding RNA PINCR regulates a subset of p53 targets in human colorectal cancer cells by binding to Matrin 3
Source: eLife journal article supplement (doi:10.7554/elife.23244), 2017-06-05
Supplement: supp [file elife-23244-supp-v1.zip]

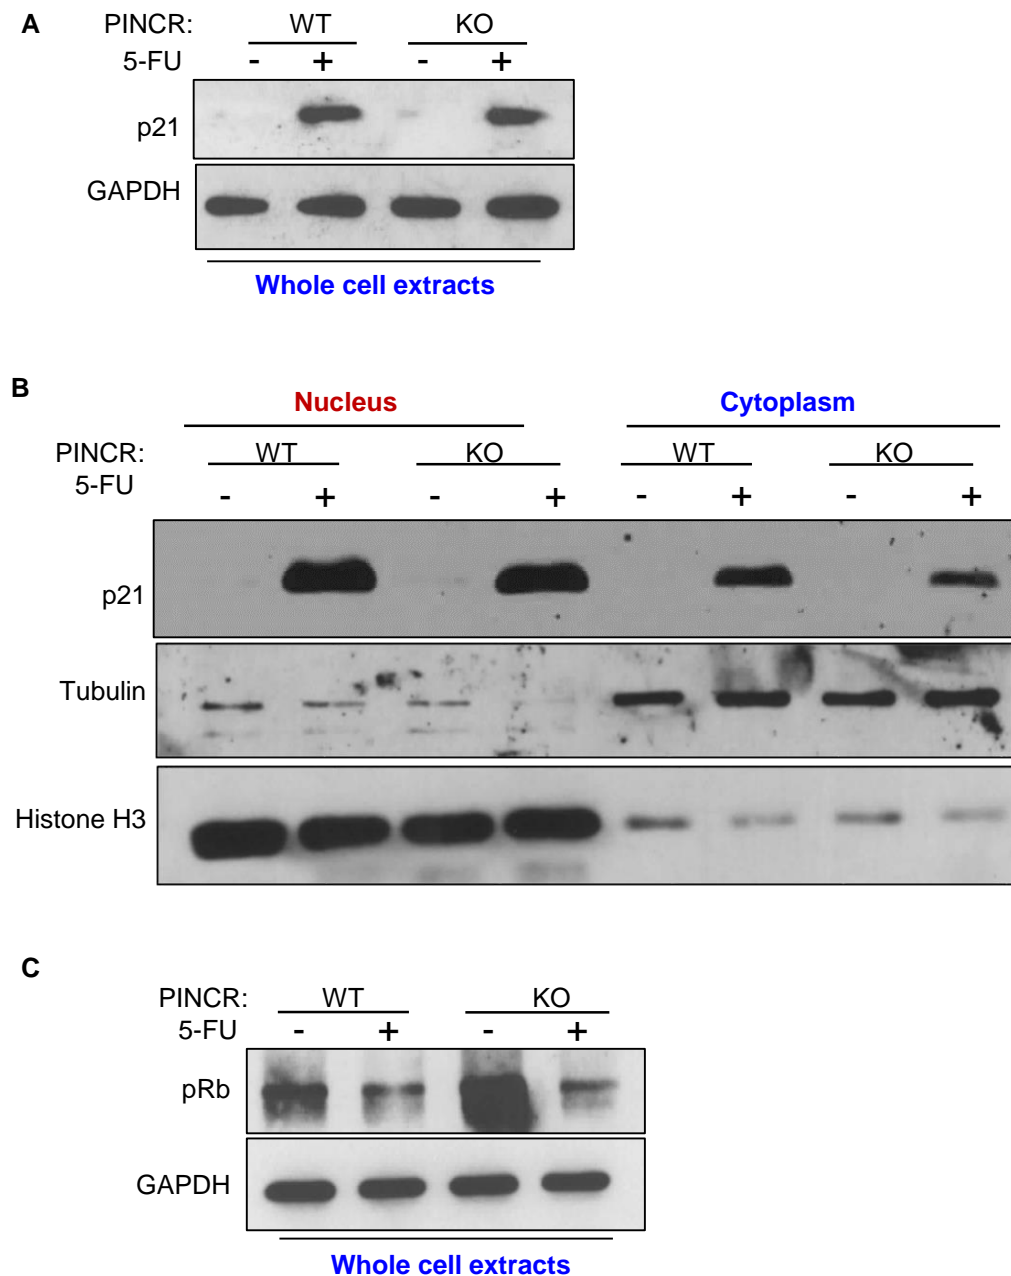

**Figure 4 – figure supplement 2. Loss of *PINCR* does not markedly alter total p21 protein levels, Rb phosphorylation or subcellular localization of p21.** Immunoblotting was performed for p21 (A) and phospho-Rb (pRb) (C) from whole cell extracts prepared from *PINCR*-WT and *PINCR*-KO HCT116 untreated or treated with 5-FU for 24 hr. GAPDH was used as loading control. (B) The effect of loss of *PINCR* on subcellular localization of p21 was determined by immunoblotting from nuclear and cytoplasmic extracts prepared from *PINCR*-WT and *PINCR*-KO HCT116 untreated or treated with 5-FU for 24 hr. Tubulin was used as cytoplasmic marker and Histone H3 was used as nuclear marker.
