# Supplementary material for: Prosurvival long noncoding RNA PINCR regulates a subset of p53 targets in human colorectal cancer cells by binding to Matrin 3
Source: eLife journal article supplement (doi:10.7554/elife.23244), 2017-06-05
Supplement: supp [file elife-23244-supp-v1.zip]

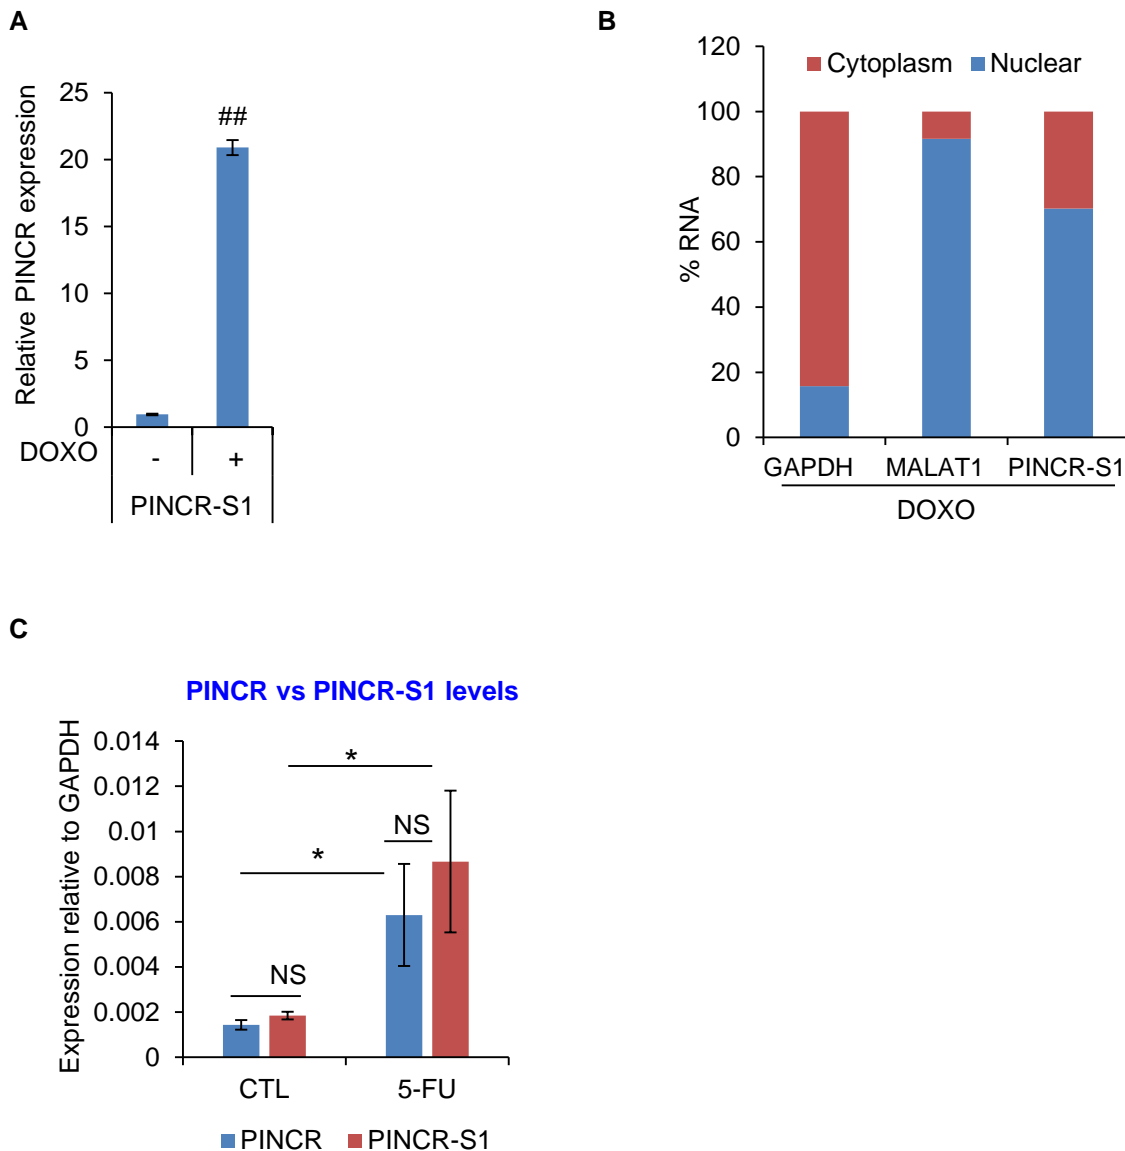

**Figure 8 – figure supplement 3. *PINCR-S1* is strongly induced after DNA damage and is a predominantly nuclear lncRNA.**

(A) *PINCR-S1* cells were left untreated or treated with DOXO for 16 hr and the extent of induction of *PINCR-S1* RNA was assessed by qRT-PCR. (B) qRT-PCR for *PINCR*, the cytoplasmic *GAPDH* and nuclear *MALAT1* was performed from nuclear and cytoplasmic fractions of *PINCR-S1* cells treated with DOXO for 16 hr. (C) The expression of endogenous *PINCR* and endogenous *PINCR-S1* relative to *GAPDH* was measured by qRT-PCR from HCT116 cells or *PINCR-S1* HCT116 cells untreated or treated with 5-FU for 16 hr. Error bars represent SD from 3 independent experiments. \* $p < 0.05$ , ## $p < 0.001$ .
