# Supplementary material for: Prosurvival long noncoding RNA PINCR regulates a subset of p53 targets in human colorectal cancer cells by binding to Matrin 3
Source: eLife journal article supplement (doi:10.7554/elife.23244), 2017-06-05
Supplement: supp [file elife-23244-supp-v1.zip]

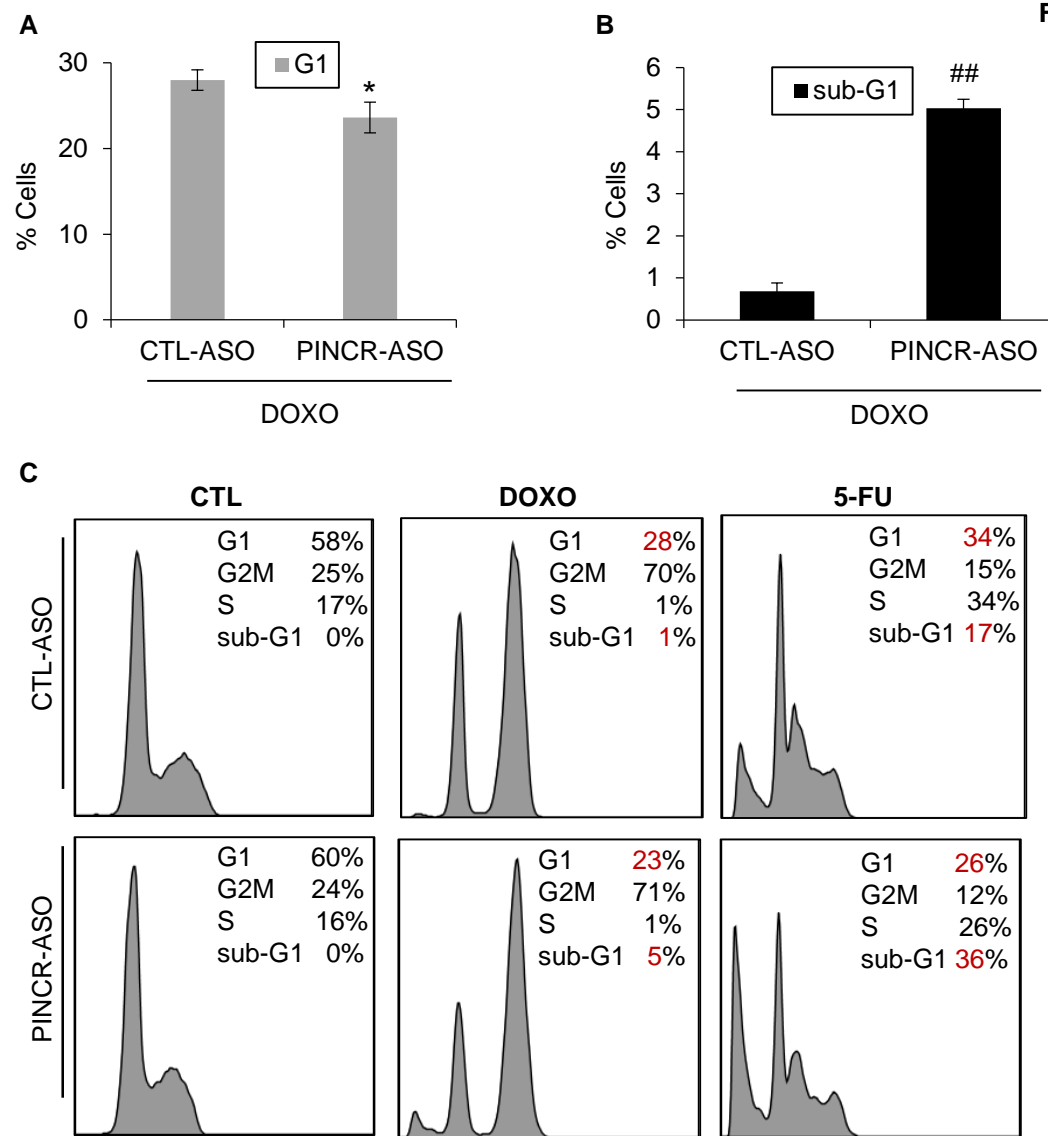

**Figure 4– figure supplement 5. Knockdown of *PINCR* results in decreased G1 arrest and increased apoptosis.**

(A) HCT116 cells were reverse transfected with CTL-ASO or *PINCR*-ASO for 48 hr and then treated with DOXO for 48 hr. The effect on cell cycle was examined by PI-staining and FACS analysis. Results from 3 independent experiments are shown in (A). Raw cell cycle profiles from a representative experiment from untreated, DOXO-treated or 5-FU treated cells (for A and Figure 4E-F) are shown. Error bars represent SD from three experiments. \* $p < 0.05$ , ## $p < 0.001$ .
