# Supplementary material for: Prosurvival long noncoding RNA PINCR regulates a subset of p53 targets in human colorectal cancer cells by binding to Matrin 3
Source: eLife journal article supplement (doi:10.7554/elife.23244), 2017-06-05
Supplement: supp [file elife-23244-supp-v1.zip]

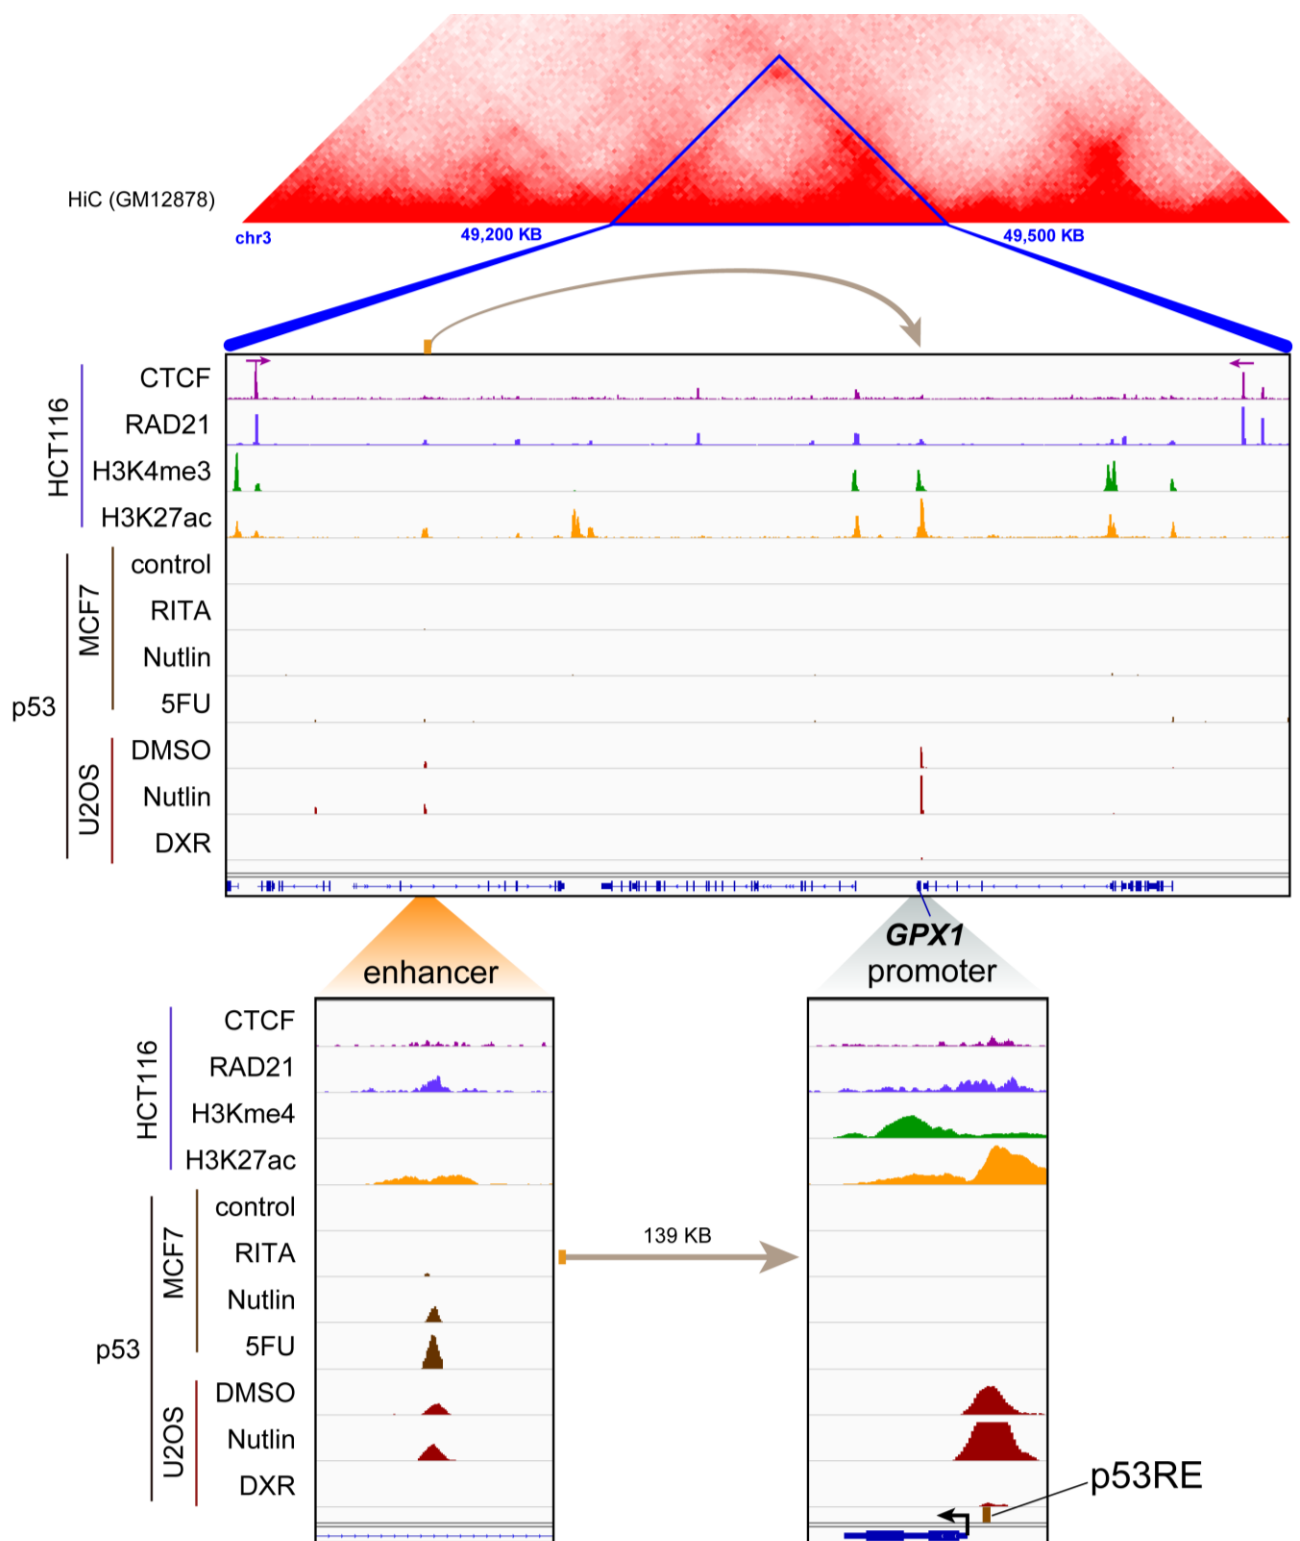

**Figure 7 – figure supplement 1.** Topological domain and looping structure indicated by 3D contact domain profile (top) surrounding *GPX1* gene (chr3:49,200,000-49,500,000) with HiC data from (Rao, Huntley et al. 2014). ChIP-seq data tracks (middle) in HCT116 showing CTCF anchors (motif direction indicated by arrow) and loop-enabling cohesion (RAD21), as well as promoter associated histone mark H3K4me3 and active promoter/enhancer associated mark H3K27ac. ChIP-seq of p53 in treated cells (MCF7 and U2OS) is also shown. Candidate regulatory enhancers (used for ChIP-qPCR of Matrin3) are highlighted with an orange box at the tail of an arrow pointing towards the putative target gene. The p53RE is shown, found at the promoter. The 1-dimensional distance between the enhancer and the promoter is indicated between the zoomed in boxes (bottom).
