# Supplementary material for: Prosurvival long noncoding RNA PINCR regulates a subset of p53 targets in human colorectal cancer cells by binding to Matrin 3
Source: eLife journal article supplement (doi:10.7554/elife.23244), 2017-06-05
Supplement: supp [file elife-23244-supp-v1.zip]

**A**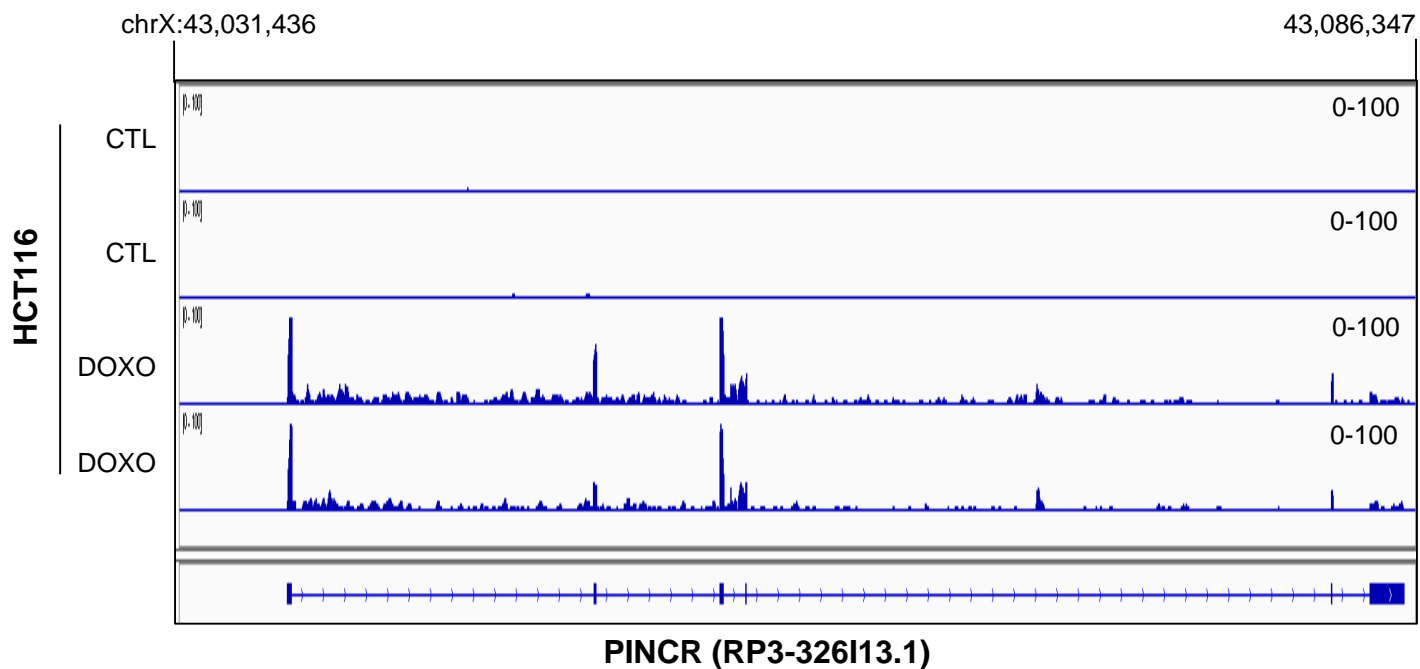**B**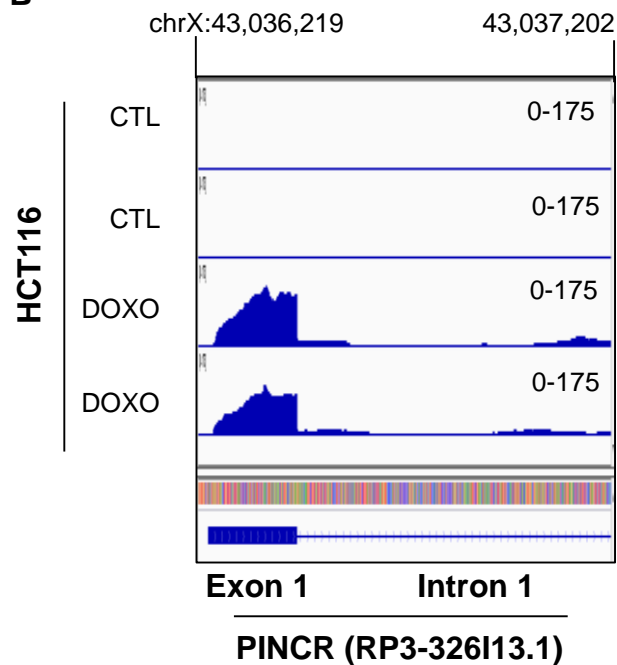**C**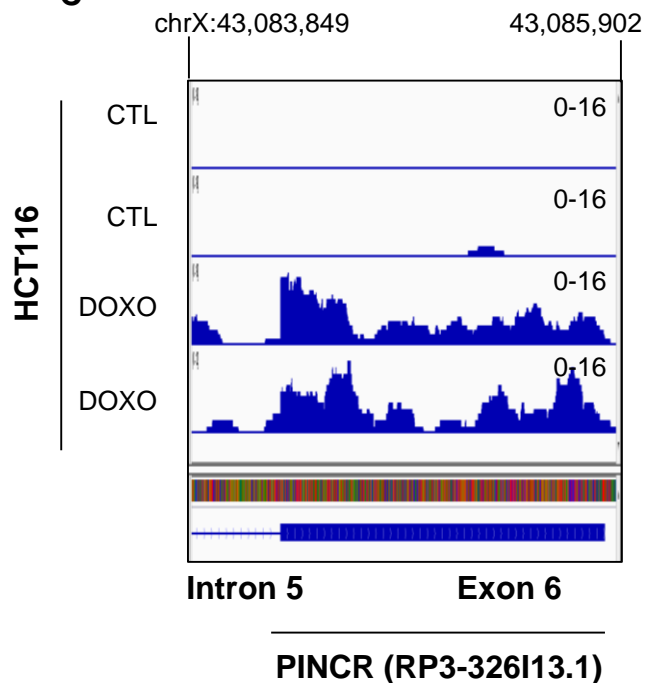

**Figure 1 - figure supplement 3.** RNA-seq was performed in duplicate from HCT116 cells untreated (CTL) or treated with DOXO (300 nM) for 16 hr (Li et al., unpublished). Snapshot of the RNA-seq data for the *PINCR* locus (A), 5' end of *PINCR* (B) and 3' end of *PINCR* (C) is shown.
