# Supplementary material for: Prosurvival long noncoding RNA PINCR regulates a subset of p53 targets in human colorectal cancer cells by binding to Matrin 3
Source: eLife journal article supplement (doi:10.7554/elife.23244), 2017-06-05
Supplement: supp [file elife-23244-supp-v1.zip]

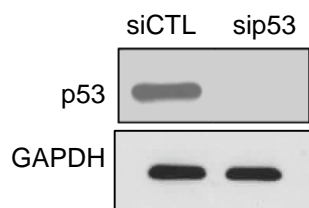

**Figure 8 – figure supplement 5.** *PINCR-SI* HCT116 cells were reverse transfected with CTL or p53 siRNAs for 48 hr and immunoblotting was performed from whole cell lysates after treating the transfected cells with 5-FU for 16 hr. GAPDH was used as loading control.
