# Supplementary material for: Prosurvival long noncoding RNA PINCR regulates a subset of p53 targets in human colorectal cancer cells by binding to Matrin 3
Source: eLife journal article supplement (doi:10.7554/elife.23244), 2017-06-05
Supplement: supp [file elife-23244-supp-v1.zip]

A

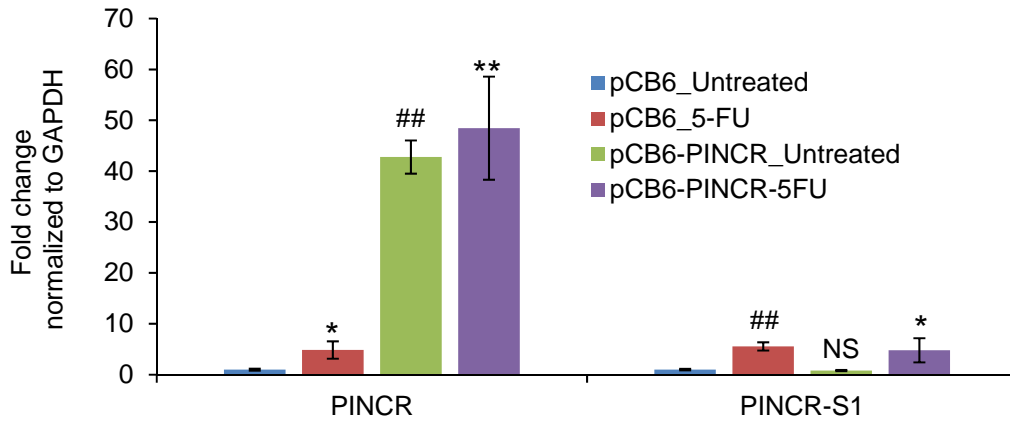

B

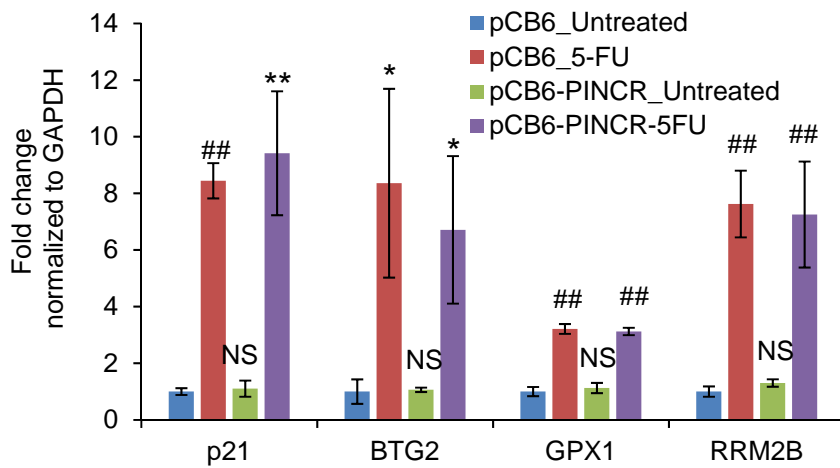

**Figure 8 – figure supplement 4. Over-expression of *PINCR* in *PINCR-S1* cells does not alter *PINCR-S1* expression or the induction of *PINCR* targets.**

(A, B) *PINCR-S1* HCT116 cells were transfected with pCB6 or pCB6-*PINCR* for 48 hr and then left untreated or treated with 5-FU for 16 hr. The expression of *PINCR*, *PINCR-S1* (using *PINCR-S1* specific primers), the *PINCR* targets *BTG2*, *GPX1* and *RRM2B* and the negative control *p21*, was measured by qRT-PCR normalized to *GAPDH*. Error bars represent SD from 3 independent experiments. \*p<0.05, \*\*p<0.005, ##p<0.001.
