# Supplementary material for: Prosurvival long noncoding RNA PINCR regulates a subset of p53 targets in human colorectal cancer cells by binding to Matrin 3
Source: eLife journal article supplement (doi:10.7554/elife.23244), 2017-06-05
Supplement: supp [file elife-23244-supp-v1.zip]

A

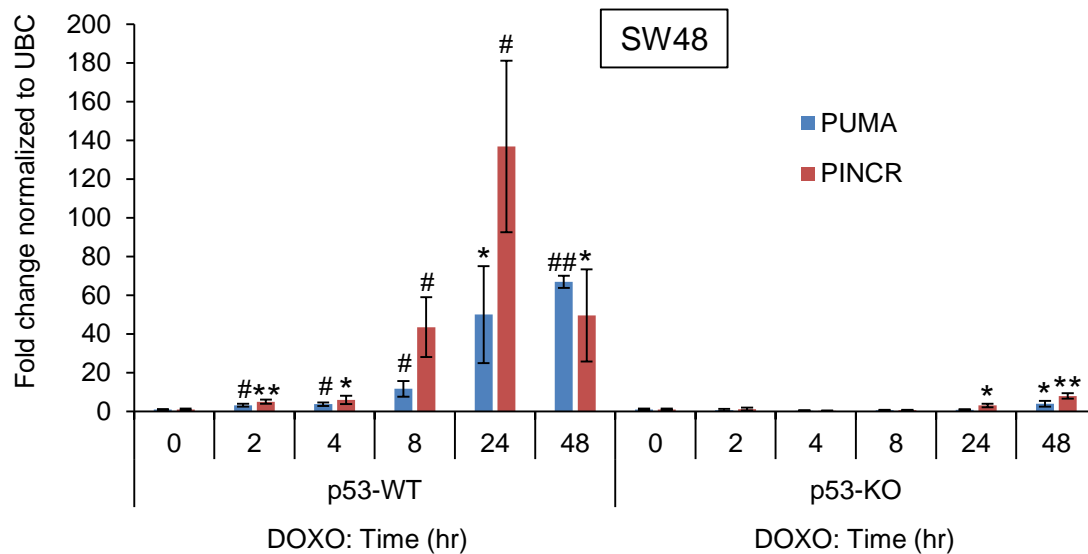

B

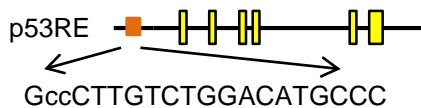

**Figure 1 - figure supplement 2. *PINCR* is highly induced after DNA damage in SW48 cells.**

(A) qRT-PCR analysis of *PINCR* and the known p53 target *PUMA* from isogenic p53-WT and p53-KO SW48 cells untreated or treated with DOXO for the indicated times. (B) Pictorial representation of *PINCR* locus and the p53 response element (p53RE) located 118 bp upstream of the first exon. Error bars represent SD from 3 biological replicates. \* $p < 0.05$ ; # $p < 0.01$ ; \*\* $p < 0.005$ ; ## $p < 0.001$
