# Supplementary material for: Prosurvival long noncoding RNA PINCR regulates a subset of p53 targets in human colorectal cancer cells by binding to Matrin 3
Source: eLife journal article supplement (doi:10.7554/elife.23244), 2017-06-05
Supplement: supp [file elife-23244-supp-v1.zip]

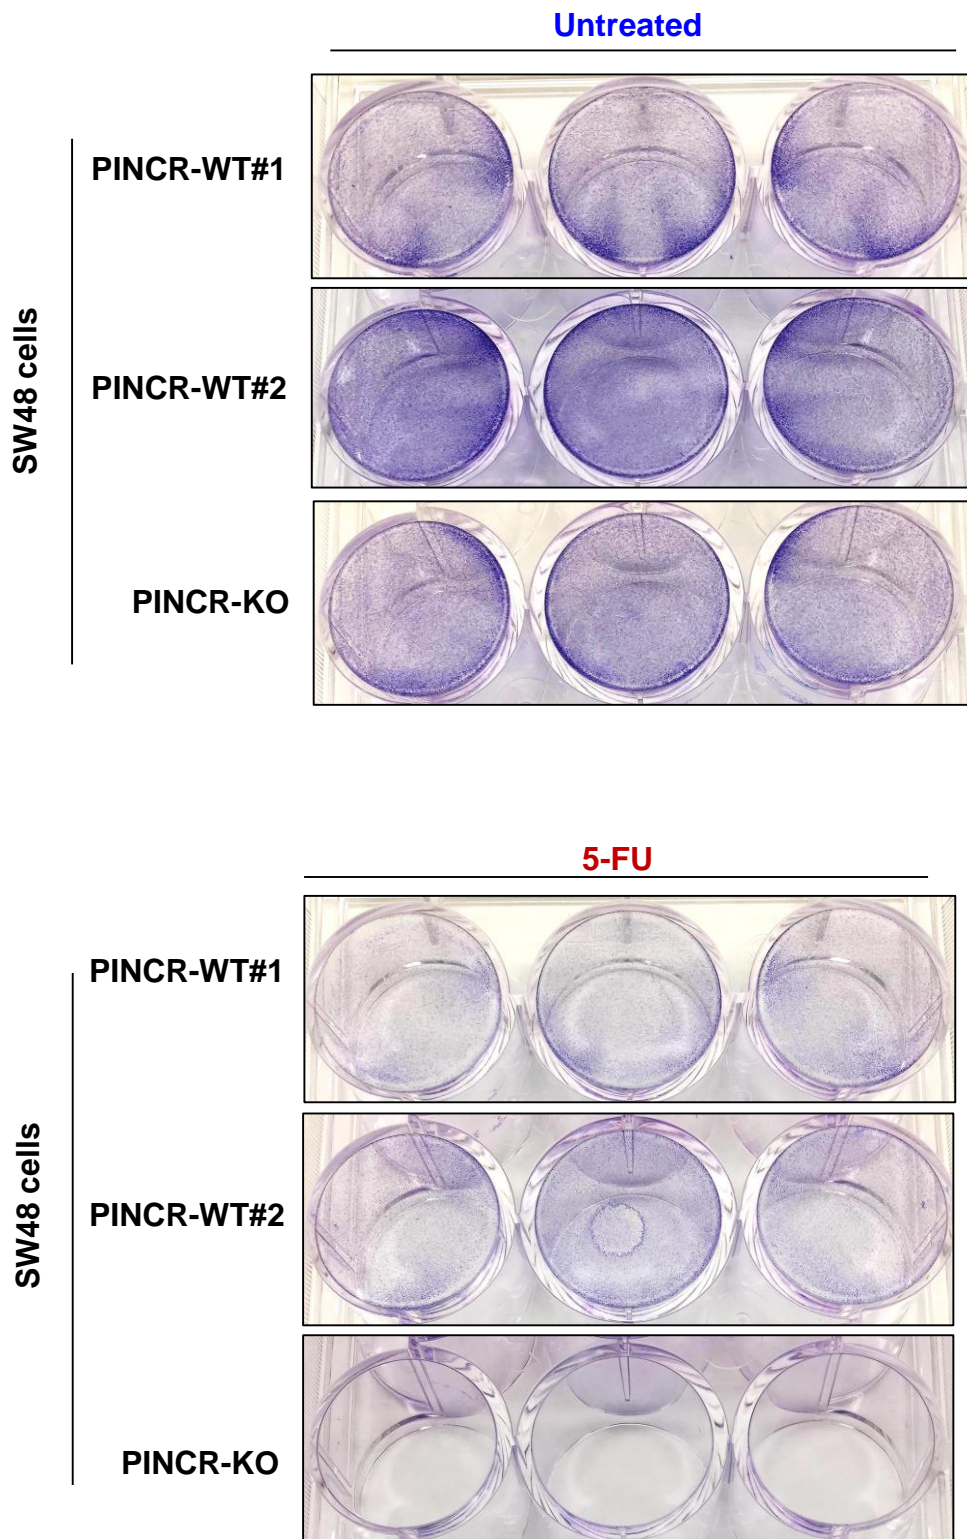

**Figure 3 – figure supplement 4.** *PINCR*-WT and *PINCR*-KO SW48 cells were untreated or treated with 5-FU. After 7 days, the effect on long-term of these cells was assessed by staining the cells with crystal violet.
