# Supplementary material for: Prosurvival long noncoding RNA PINCR regulates a subset of p53 targets in human colorectal cancer cells by binding to Matrin 3
Source: eLife journal article supplement (doi:10.7554/elife.23244), 2017-06-05
Supplement: supp [file elife-23244-supp-v1.zip]

AGCTCACCGGCTCCAGATTTATCAGCAATAAACCCAGCCAGCCGGAAGGGCCGAGCGCAGAAGTGGTCTGCAACTTTATCCGCTCCATCCAGTCT  
 ATTAATTGTTGCCGGAAGCTAGAGTAAGTAGTTCGCCAGTTAATAGTTTGCACAACGTTGTTGCCATTGCTACAGGCATCGTGGTGTCACGCTCGTC  
 GTTTGGTATGGCTTCATTACAGCTCCGGTTCACCAACGATCAAGGCGAGTTACATGATCCCCATGTTGTGCAAAAAAGCGGTTAGCTCCTTCGGTCCCTC  
 CGATCGTTGTCAGAAGTAAGTTGGCCGAGTGTTATCACTCATGGTTATGGCAGCACTGCATAATTCTCTTACTGTCATGCCATCCGTAAGATGCTTTT  
 CTGTGACTGGTGAGTACTCAACCAAGTCATTCTGAGAATAGTGTATGCGGCGACCGAGTTGCTCTTGCCCGGCGTCAATACGGGATAATACCGCGCC  
 ACATAGCAGAACTTTAAAGTGCTCATCATTGAAACGTTCTTCGGGGCGAAAACTCTCAAGGATCTTACCGCTGTTGAGATCCAGTTCGATGTAAC  
 CCACCTCGTGACCCCAACTGATCTTCAGCATCTTTTACTTTCCACCAGCGTTTCTGGGTGAGCAAAAAACAGGGAAGGCAAAATGCCGCAAAAAAGGGAATA  
 AGGGCGACACGGAAATGTTGAATACTCATACTCTTCTTTTCAATATTATTGAAGCATTTATCAGGGTTATTGTCTCATGAGCGGATACATATTGAAT  
 GTATTTAGAAAAATAAACAAATAGGGGTTCCGCGCACATTTCCCGAAAAAGTGCCACCTAAATTGTAAGCGTTAATATTTTGTAAAAATTCGCGTTAAAT  
 TTTTGTAAATCAGCTCATTTTTTAAACCAATAGGCCGAAATCGGCAAAATCCCTTATAAATCAAAAGAAATAGACCGAGATAGGGTTGAGTGTGTTTCCA  
 GTTTGGAACAAGAGTCCACTATTAAGAAGCTGGACTCCAACGTCAAAGGGCGAAAAACCGTCTATCAGGGCGATGGCCCACTACGTGAACCATCAC  
 CCTAATCAAGTTTTTTGGGGTCGAGGTGCCGTAAAGCACTAAATCGGAACCCTAAAGGGAGCCCCCGATTTAGAGCTTGACGGGGAAAGCCGGCGA  
 ACGTGCGAGAAAGGAAGGAAGGAAGCAAGGAGCGGGCGCTAGGGCGCTGGCAAGTGTAGCGGTACAGCTGCGCGTAACCAACACACCCGC  
 CGCGCTTAATGCGCCGTACAGGGCGCGTCCCATTGCCATTACAGGTGCGCAACTGTTGGGAAGGGCGATCGGTGCGGGCCCTCTTCGCTATTAC  
 GCCAGCTGGCGAAAGGGGGATGTGCTGCAAGGCGATTAAGTTGGGTAAACGCCAGGGTTTTCCAGTACACGACGTTGTAACGACGCGCCAGTGAG  
 CGCGCGTAATACGACTCACTATAGGGCGAATTGGGTACCCACCGATTTGGTTCACAGTTCGGATCCACCGACAGAAATCATGCAAGTGCG  
 TAAGATAGTCGCGGGCCGGGAAATTTTATTTTATTTTATGGATCCGTAAGTAAGGGTGAGGAGTTGTTACAGGGGTGGTGCCCATACTGGTCGAGCTT  
 GACGGAGATGTCAATGGCCATAAGTTCTCCGTATCAGGCGAGGGGGAAGGAGACGCGACATATGGCAAGCTGACACTCAAGTTTATTTGTACCACTG  
 GTAAGCTGCCCGTCCCCTGGCCGACTCTCGTAACAACGCTGACATACGGGGTCCAGTGTTTCTCCCGCTACCCCGACCATATGAAGCAGCATGATTT  
 CTTCAAGAGTGCCATGCCAGAGGGCTATGTCCAGGAAAGAACCATATTTTTCAAGGATGATGGAACATACTCGGCCACAACTGGAATATAACTATAATTTCCCA  
 GGAGATACTCTGTAATAGGATAGAGCTGAAAGTATCGATTTCAAAGAAGATGGGAACATACTCGGCCACAACTGGAATATAACTATAATTTCCCA  
 TAACGTTTACATTATGGCCGCAAGCAGCAAAAAACGGGATTAAGTCAATTTTAAAGCAATAGACATAATATACGGGATGTAGCGTGTCCGCTGCCCGACC  
 ATTATCAACAGAATACCCCCATTGGGGATGACCTGTTCTGCTGCTGATAATCACTACCTGTCCACCCAATCCGCCCTCAGCAAGGACCCCAATGAG  
 AAGCGAGACCATATGGTGCTCCTCGAATTTGTACCGCTGCTGGTATAACCTGGGAATGGACGAACTCTACAAGACCGGGCCATGGTAAAGCGGC  
 CGCGACTCTAGATCAATCGAATTCACCTCCTCAGGTGCAGGCTGCCTATCAGAAGGTGGTGGCTGGTGTGGCCAATGCCCTGGCTCACAAATACCACT  
 GAGATCTTTTCCCTCTGCCAAAAATTATGGGGACATCATGAACGCAGTGAAAAAATGCTTTATTTGTGAATTTGTGATGCTATTGCTTTATTTGTAA  
 CCATTATAAGCTGCAATAAACAAAGTTCTCGAGAAGTTCCTATTCTCTAGAAAGTATAGGAACCTCTGGCTGCAGGTGCTCGAAATCTACCGGGTAGG  
 GGAGGCGCTTTTCCAAGGCAGTCTGGAGCATGCGCTTTAGCAGCCCCGCTGGGCACCTTGGCGCTACACAAGTGCCCTCTGGCCTCGCACACATTC  
 CACATGCCACCGGTAGGCGCAACCGCGTCCGTTCTTTGGTGGCCCTTGGTCCACGACCTTGCACGCACTGGCCGAACCTCTCCCGATGTCGGAAGTTGGCCGACGACCC  
 GCAGCTCGCGTCTGTCAGGACGTGACAAATGGAAGTAGCACGTCTCACTAGTCTCGTGCAGATGGACAGCACCGCTGAGCAATGGAAGCGGGTAG  
 GCCTTTGGGGCAGCGGCCAATAGCAGCTTTGGCTCCTTCGCTTTCTGGGCTCAGAGGCTGGGAAGGGGTGGGTCCGGGGGCGGGGCTCAGGGGCG  
 GGCTCAGGGGCGGGGCGGGCGCCGAAGTCTCCGAGGCCCCGGCATTCTGCACGCTTCAAAGCGCACGTCTGCCGCGCTGTTCTCCTCTTCC  
 TCATCTCCGGGCGCTTCGACCTGCATCCATCTAGATCTCGACGAGCTGAAGCTTACCATGGAATTCACAGAATAACAAGCCACAGTACGGCTTGCAAC  
 TCGAGACGACGTTCCAGAGCAGTGAGAACCCTGGCAGCTGCTTTTGCAGACTATCCGGCCACGAGGCACACTGTCGATCCCGATCGGCACATCGA  
 GCGCGTTACAGAATTGCAGAACTGTTCTGACAAGAGTTGGGCTCGACATTGGTAAAGTGTGGTCTGCTGACGACGGGGCAGCTGTTGCGGTGTG  
 GACCACACCGGATGAGAGTGTGGAGCCGGTGCTGTTTGGTCCGAAATTTGGTCCACGACCTGGCCGAACCTGCGGAGTCTCCGATGTCGGAAGTTGGCCGACGACCC  
 AGATGGAAGGCCTGCTGGCGCCTACCGACCTAAAGAGCCTGCATGGTTTCTGGCCACCGTCGGCGTATCCCCGATCATCAGGGTAAGGGCCTCG  
 GCAGCGCCGTCTGCTGCCGGGTGTTGAGGCAGCTGAAAGAGCAGGCGTGCCGGCGTTTTTGGAACTAGTGACCCGAGGAATCTCCCATTTTACG  
 AGAGACTGGGGTTCACCGTGACAGCCGATGTGCAAGTGCCCGAAGGCCCTAGGACCTGGTGTATGACCCGCAAGCCCGGTGCCGCTAGCTGACAG  
 ACATGATAAGATACATTGATGAGTTTGACACGACTGTGCCTTCTAGTTGCCAGCCATCTGTTGTTTGCCTCCCGTGCCTTCCTTGACCCCTGGA  
 AGGTGCCACTCCCAGTGTCTTTCTAATAAAATGAGGAAATTCATCGCATTGTCTGAGTAGGTGTCATTCTATTCTGGGGGGTGGGGTGGGGCAG  
 GACAGCAAGGGGAGGATTGGGAAGATCAATAGCAGGCATGCTGGGGATGCGGTGGGCTCTATGGAATCATTACCGCGGTGGAGCTCCAGCTTTT  
 GTTCCCTTTAGTGAGGGTTAATTGCGCGCTTTGGCGTATCATGCTGTTTCTGTGAAATTTGTTACCGCTCACAATTCACACAACATAC  
 GAGCCGGAAGCATAAAGTGTAAAGCCTGGGGTGCCATATGATGAGTCACTCACTACATTAATTGCGTTGCGCTCACTGCCCGCTTTCCAGTGGCGGAA  
 CCTGTGCTGCCAGCTGCATTAATGAATCGGCCAACGCGCGGGGAGAGGCGGTTTGCATTGGGCGCTCTTCCGCTTCTCGCTCACTGACTCGCT  
 GCGCTCGGTGCTTCCGCTGCGGCGAGCGGTATCAGCTCACTCAAAGGCGGTAATACGGTTATCCACAGAATCAGGGGATAACGAGGAAAGAACAT  
 GTGAGCAAAAGGCCAGCAAAAGGCCAGGAACCGTAAAAAGGCCGCGTTGCTGGCGTTTTTCCATAGGCTCCGCCCCCTGACGAGCATCACAAAAA  
 TCGACGCTCAAGTCAGAGGTGGCGAAACCCGACAGGACTATAAAGATACCAGGCGTTTTCCCTGGAAGCTCCCTCGTGCGCTCTCCTGTTCCGAC  
 CCTGCCGCTTACCGGATACCTGTCCGCCCTTCTCCCTTCGGGAAGCGTGCGCGCTTTCTCATAGCTCACGCTGTAGGTATCTCAGTTCCGTTGATGGTC  
 GTTCGCTCAAAGCTGGGCTGTGTGCACCAACCCCGTTCAGCCGACCGCTGCGCTATCCGGTAACTATCGTCTTGAGTCCAACCCGGTAAGA  
 CACGACTTATGCCACTGGCAGCAGCACTGGTAACAGGATTAGCAGAGCGAGGTGTATAGGCGGTGCTACAGAGTCTTGTAAGTGGTGGCGTAAC  
 TACGGCTACACTAGAAGGACAGTATTTGGTATCTGCGCTCTGCTGAAGCCAGTTACCTTCGGAAGGAGATTGGTAGCTCTTGATCCGGCAAAACAAAC  
 CACCGCTGGTAGCGGTGGTTTTTTTGTGTTGCAAGCAGCAGATTACGCGCAGAAAAAAGGATCTCAAGAAGATCCTTTGATCTTTTCTACGGGGTCTG  
 ACGCTCAGTGGAACGAAACTACGTTAAGGGATTTTGGTCATGAGATTCAAAAAGGATCTTACCTAGATCCTTTAAATTAATAAAGTGAAGTTTTAA  
 ATCAATCTAAAGTATATAGTAAACTTGGTCTGACAGTTACCAATGCTTAATCAGTGAGGCACCTATCTCAGCGATCTGTCTATTTCGTTTCATCCATA  
 GTTGCGTGACTCCCGTCTGTGATAGATACTACGATACGGGAGGGCTTACCATCTGGCCCCAGTGCTGCAATGATACCGCGAGACCC

**Figure 8 – figure supplement 2.** Full sequence of the S1 targeting vector. Text highlighted in green corresponds to sgRNA target sequence, red is the S1-tag and blue is the 3' end of *PINCR*.
