# Supplementary material for: Prosurvival long noncoding RNA PINCR regulates a subset of p53 targets in human colorectal cancer cells by binding to Matrin 3
Source: eLife journal article supplement (doi:10.7554/elife.23244), 2017-06-05

A

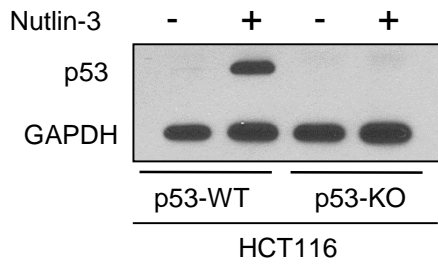

C

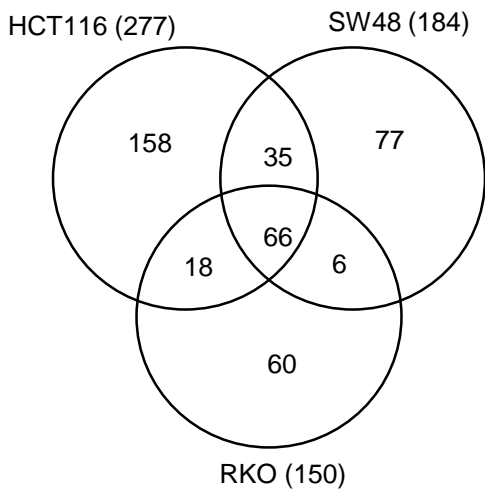

### Figure 1 - figure supplement 1.

(A) Isogenic p53-WT and p53-KO HCT116 cells were untreated or treated with Nutlin-3 for 8 hr and immunoblotting was performed for p53 and the loading control GAPDH. (B) Heat map is shown for the differentially expressed mRNAs and lncRNAs identified by microarrays performed in duplicate from HCT116, SW48 and RKO cells untreated or treated with Nutlin-3 for 8 hr. Upregulated genes are shown in red and downregulated genes in green. *PINCR* (*RP3-326I13.1*) is shown in the red box. (C) Venn diagram showing the overlap between the transcriptomes upregulated  $\geq 1.5$ -fold after Nutlin-3 treatment of HCT116, SW48 and RKO cells.

B

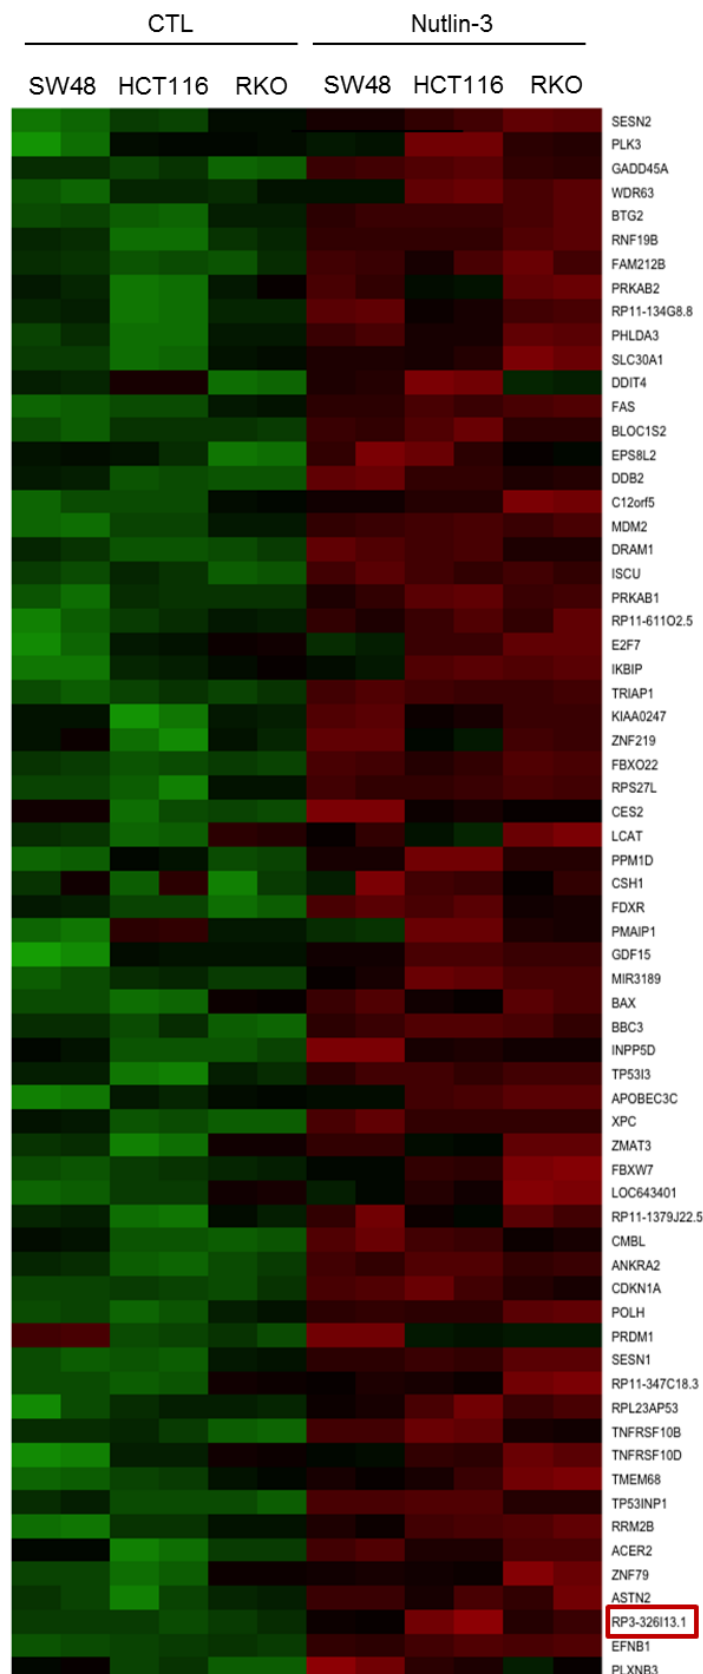

Supplement: supp [file elife-23244-supp-v1.zip]
