# Supplementary material for: Prosurvival long noncoding RNA PINCR regulates a subset of p53 targets in human colorectal cancer cells by binding to Matrin 3
Source: eLife journal article supplement (doi:10.7554/elife.23244), 2017-06-05
Supplement: supp [file elife-23244-supp-v1.zip]

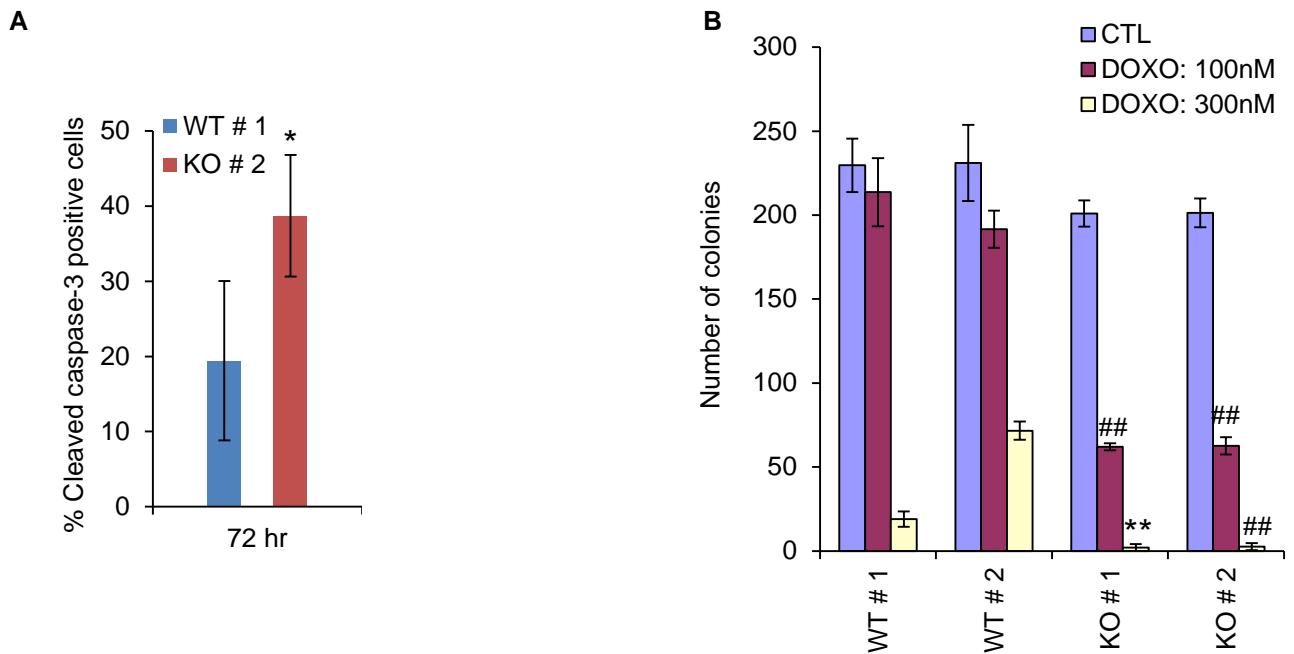

**Figure 2 – figure supplement 4.** (A) Quantitation for Figure 2F. Percentage cleaved Caspase-3 positive cells in *PINCR*-WT and *PINCR*-KO clones after 72 hr DOXO treatment is shown. (B) Quantitation for Figure 2G. Number of colonies in *PINCR*-WT and *PINCR*-KO clones untreated or treated for 4 hr with the indicated DOXO concentrations. Error bars represent SD from three experiments.

\* $p < 0.05$ ; \*\* $p < 0.005$ ; ## $p < 0.001$ .
