# Supplementary material for: Prosurvival long noncoding RNA PINCR regulates a subset of p53 targets in human colorectal cancer cells by binding to Matrin 3
Source: eLife journal article supplement (doi:10.7554/elife.23244), 2017-06-05
Supplement: supp [file elife-23244-supp-v1.zip]

A

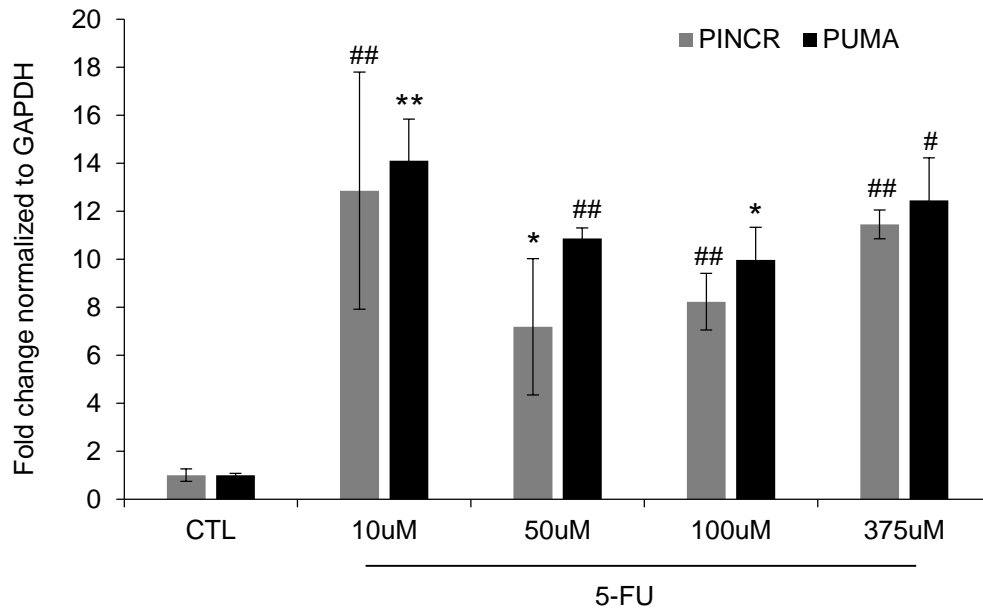

B

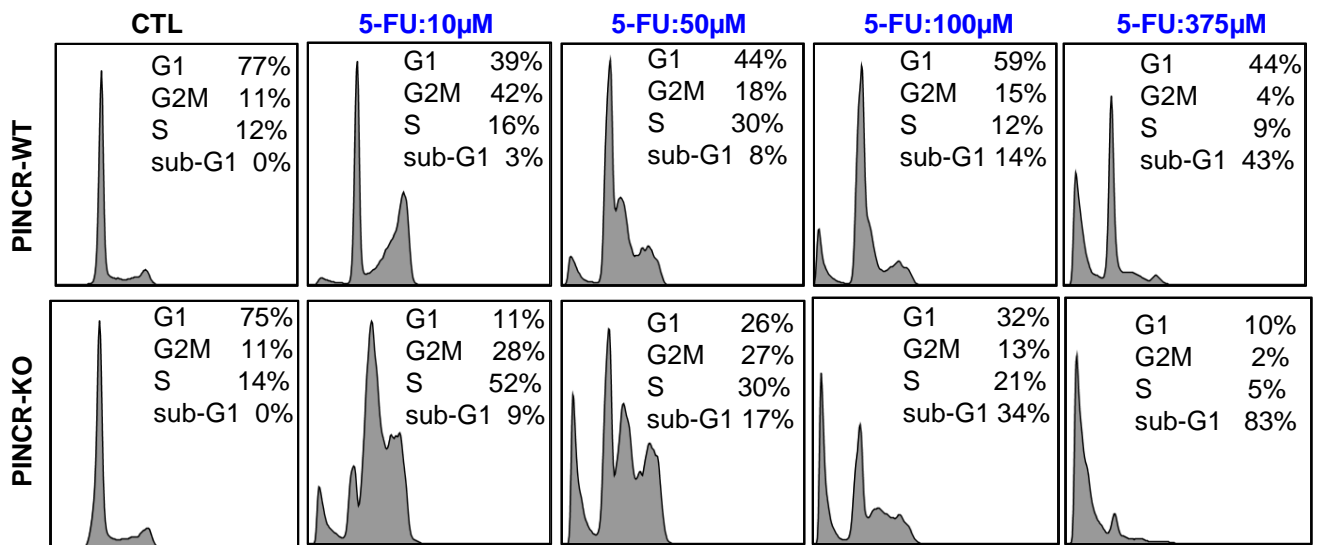

**Figure 3 – figure supplement 5.** (A) qRT-PCR analysis from HCT116 cells untreated or treated for 24 hr with different doses of 5-FU. (B) HCT116 *PINCR*-WT and *PINCR*-KO cells were untreated or treated for 48 hr with different doses of 5-FU and cell cycle profiles were examined by PI-staining and FACS analysis. Error bars represent SD from three experiments. \* $p < 0.05$ ; # $p < 0.01$ ; \*\* $p < 0.005$ ; ## $p < 0.001$ .
