# Supplementary material for: Prosurvival long noncoding RNA PINCR regulates a subset of p53 targets in human colorectal cancer cells by binding to Matrin 3
Source: eLife journal article supplement (doi:10.7554/elife.23244), 2017-06-05
Supplement: supp [file elife-23244-supp-v1.zip]

A

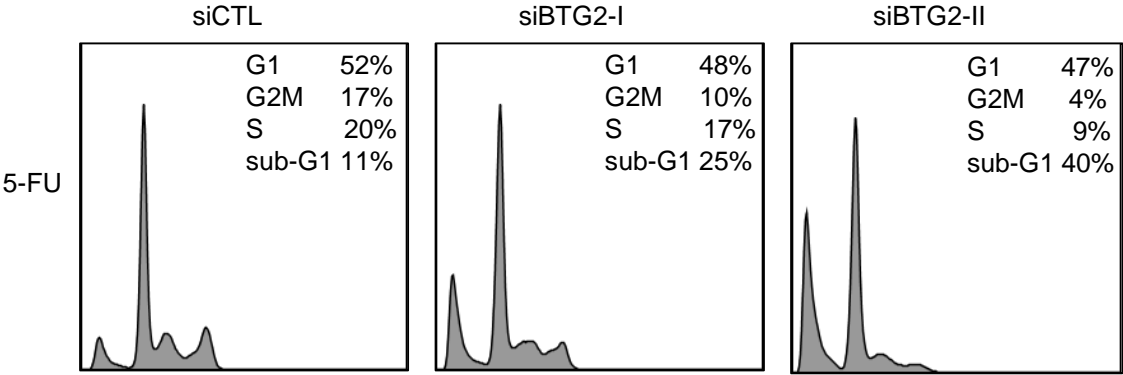

B

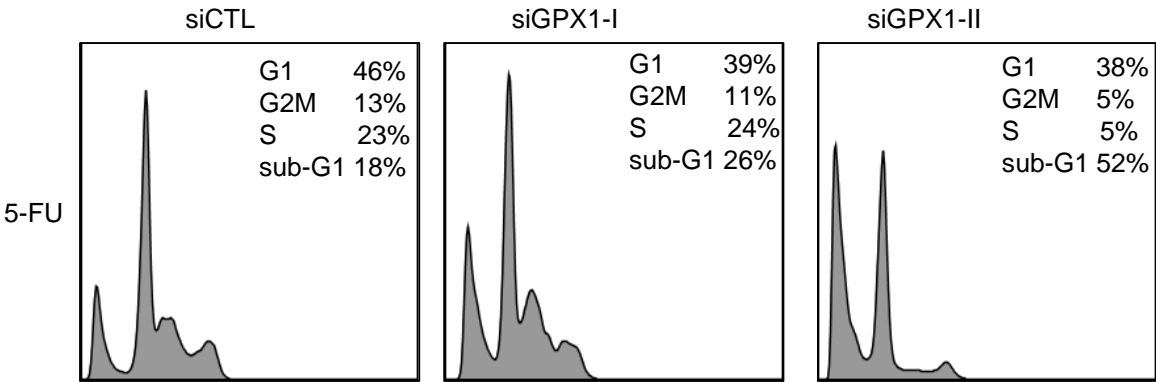

C

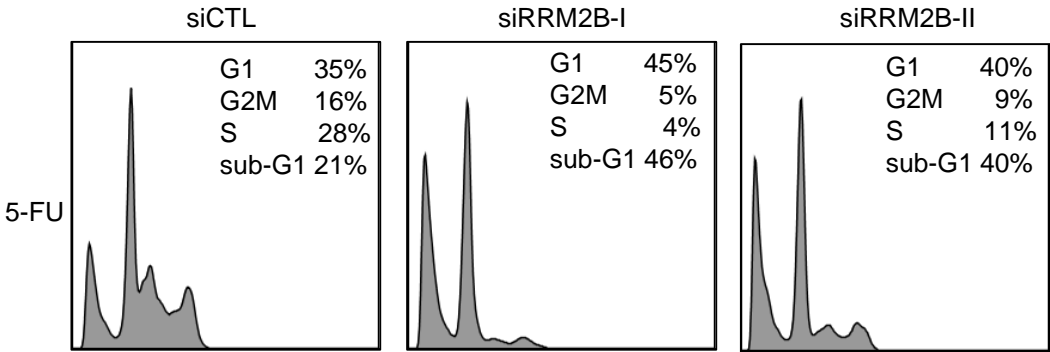

**Figure 4— figure supplement 4. Raw cell cycle profiles showing that knockdown of the *PINCR* targets *BTG2*, *GPX1* or *RRM2B* phenocopies the effect of *PINCR* loss.** Raw cell cycle profiles from the PI-staining and FACS analysis of Figure 4 – figure supplement 4 are shown.
