# Supplementary material for: Prosurvival long noncoding RNA PINCR regulates a subset of p53 targets in human colorectal cancer cells by binding to Matrin 3
Source: eLife journal article supplement (doi:10.7554/elife.23244), 2017-06-05
Supplement: supp [file elife-23244-supp-v1.zip]

A

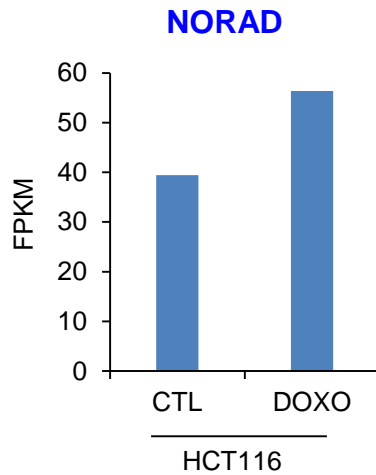

B

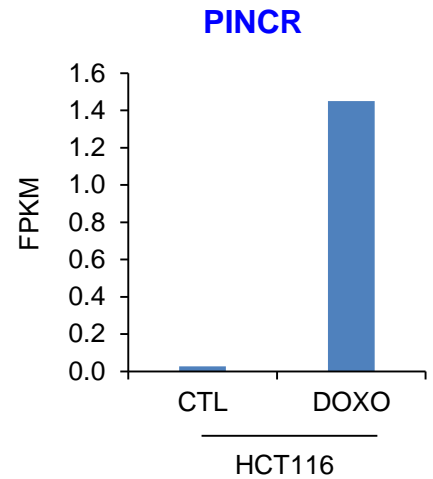

C

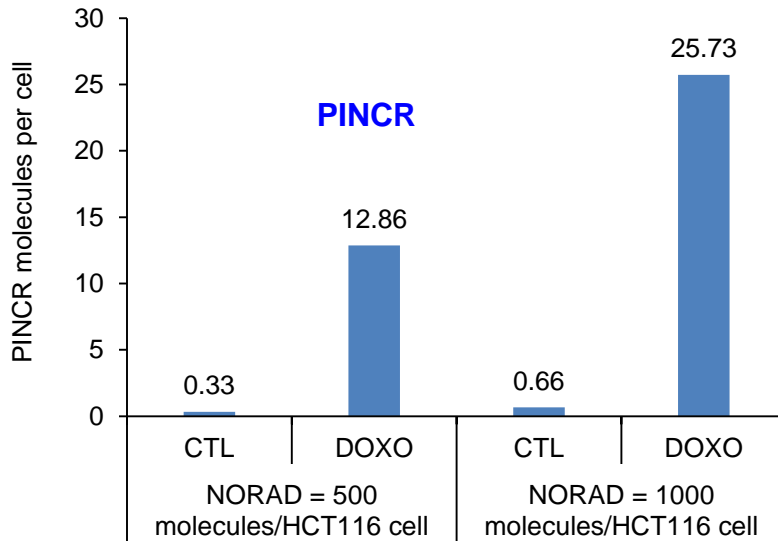

D

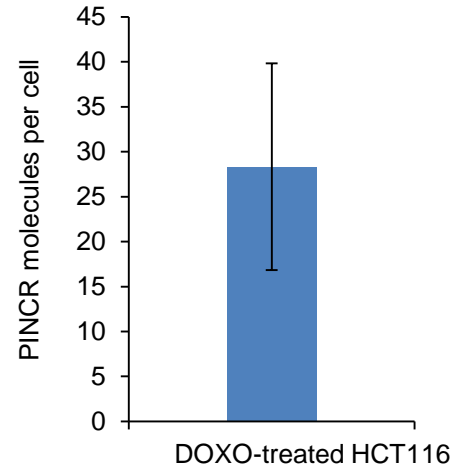

### Figure 1 - figure supplement 5. *PINCR* molecules per HCT116 cell.

The number of molecules of *PINCR* RNA per HCT116 cell was determined by two approaches. First (A-C), using RNA-seq from HCT116 cells (Li et al., unpublished): The FPKM of *PINCR* from CTL and DOXO-treated HCT116 cells was compared to NORAD, a lncRNA known to be expressed at 500-1000 molecules/HCT116 cell (Lee et al., Cell 2016). Second (D), by qRT-PCR from DOXO-treated HCT116 cells using *in vitro* transcribed *PINCR* RNA as standard.
