# Supplementary material for: Prosurvival long noncoding RNA PINCR regulates a subset of p53 targets in human colorectal cancer cells by binding to Matrin 3
Source: eLife journal article supplement (doi:10.7554/elife.23244), 2017-06-05
Supplement: supp [file elife-23244-supp-v1.zip]

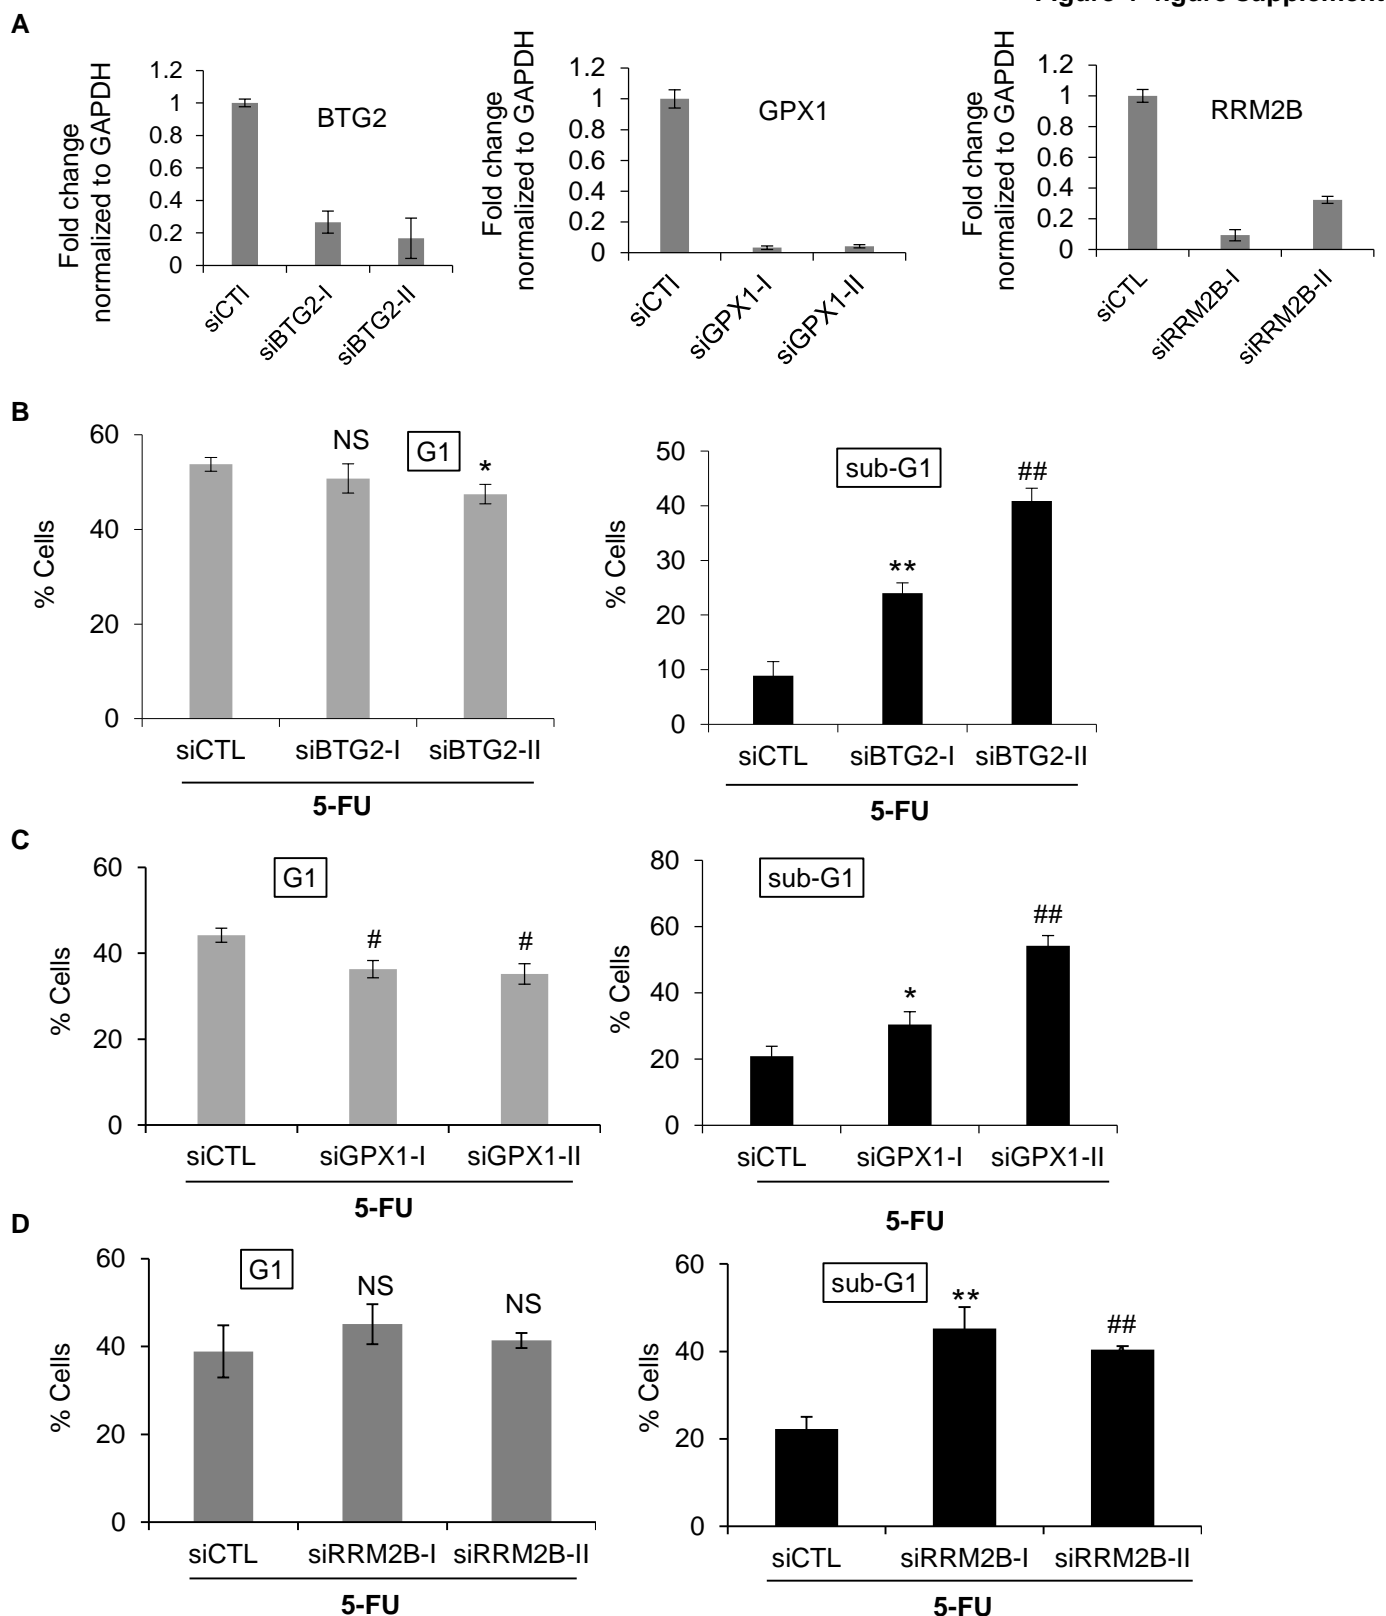

**Figure 4 – figure supplement 3. Knockdown of the *PINCR* targets *BTG2*, *GPX1* or *RRM2B* phenocopies the effect of *PINCR* loss.** (A) qRT-PCR analysis from *PINCR*-WT HCT116 cells transfected for 48 hr with control siRNA (siCTL) or 2 independent siRNAs (I and II) against *BTG2*, *GPX1* or *RRM2B*. PI-staining and FACS analysis was performed from *PINCR*-WT HCT116 cells (treated with 5-FU for 48 hr) after knockdown of *BTG2*, *GPX1* or *RRM2B*. Error bars represent SD from three biological replicates. \* $p < 0.05$ ; # $p < 0.01$ ; \*\* $p < 0.005$ ; ## $p < 0.001$
