# Supplementary material for: Prosurvival long noncoding RNA PINCR regulates a subset of p53 targets in human colorectal cancer cells by binding to Matrin 3
Source: eLife journal article supplement (doi:10.7554/elife.23244), 2017-06-05
Supplement: supp [file elife-23244-supp-v1.zip]

**A**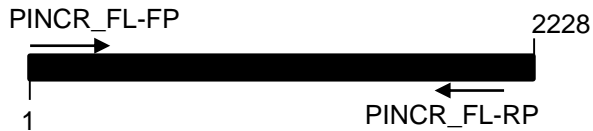

PINCR\_FL-FP: Starts at position 1.

PINCR\_FL-FP: ATTCAATCTGTGAGGTGGATGCGTGTTGGAAGGA

PINCR\_FL-RP: Starts at position 1864

PINCR\_FL-RP: AAGGGTATAACAATCACCCGGAGTCAGACAATTG

35 cycles

|              |
|--------------|
| 98 C 30s     |
| 98 C 10 s    |
| 60 C 10s     |
| 72 C 1.5 min |
| 72 C 5 min   |
| 4 C forever  |

**Primer:** 10 uM mix of FP and RP = 2.5 ul

**Template:** For a 25 ul reaction with 2x Phusion NEB

pCB6-PINCR = 10 ng

cDNA = 2 ul out of a 10 ul RT reaction (iScript RT mix)

**B**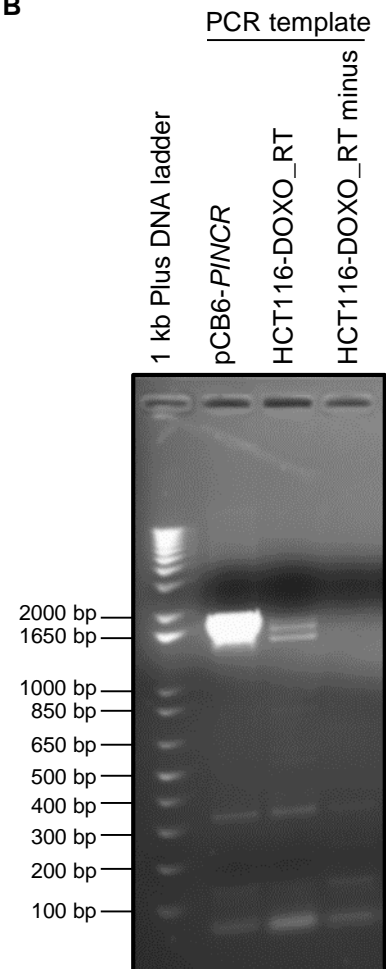

**Figure 1 - figure supplement 4.** RT-PCR for *PINCR* was performed using cDNA prepared from HCT116 DOXO-treated total RNA or pCB6-*PINCR*. The forward primer starts at the 5' end of the annotated *PINCR* RNA and the reverse primer is located near the 3' end of *PINCR* RNA. Location of the primers and conditions for PCR are shown in (A). Picture of the agarose gel after electrophoresis is shown in (B). pCB6-*PINCR* was used as positive control. RT minus refers to a control reaction in which the total RNA was used as template for PCR.
