# Supplementary material for: Prosurvival long noncoding RNA PINCR regulates a subset of p53 targets in human colorectal cancer cells by binding to Matrin 3
Source: eLife journal article supplement (doi:10.7554/elife.23244), 2017-06-05
Supplement: supp [file elife-23244-supp-v1.zip]

Figure 3 – figure supplement 7

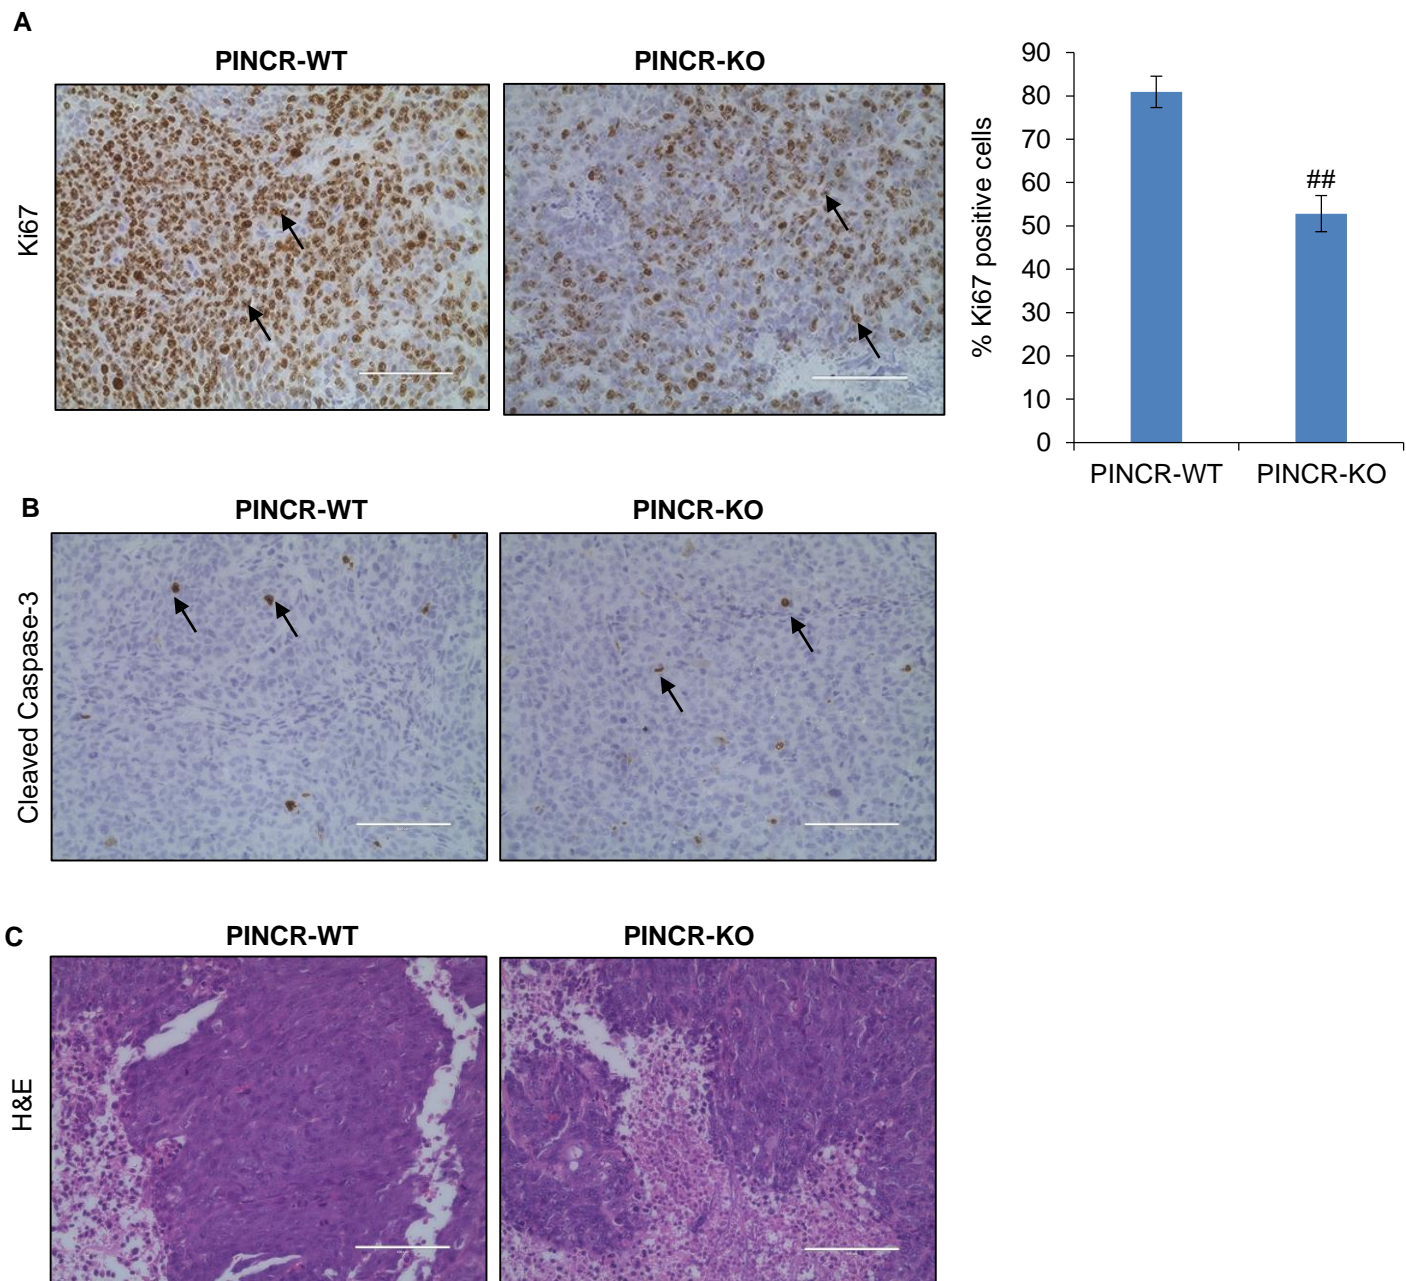

**Figure 3 – figure supplement 7.** Immunohistochemical staining of the *PINCR*-WT and *PINCR*-KO tumors for the proliferation marker Ki67 (A), apoptosis marker Cleaved Caspase-3 (B) and H&E staining (C). Arrows indicate Ki67 (A) or Cleaved Caspase-3 (B) positive cells. Error bars represent SD from four biological replicates. ## $p<0.001$
