# Supplementary material for: Prosurvival long noncoding RNA PINCR regulates a subset of p53 targets in human colorectal cancer cells by binding to Matrin 3
Source: eLife journal article supplement (doi:10.7554/elife.23244), 2017-06-05
Supplement: supp [file elife-23244-supp-v1.zip]

**A**

|                   |                                   |
|-------------------|-----------------------------------|
|                   | Putative binding motif<br>(TTCTT) |
| PINCR<br>(L=2228) | N=6<br>ES = 2.8                   |

**B**

A 5-mer motif will appear every  $2^{10}$  (1024) nucleotides in the human mRNA transcriptome.

Average size of a human mRNA is 2048 nucleotides.

So, a 5-mer motif should appear 2 times in a 2048 nt RNA.

The enrichment score =  $2^{2n}/L \times N$ .

N = number of times the motif appears in your RNA length.

L = length of the RNA, and n = motif length.

**C**

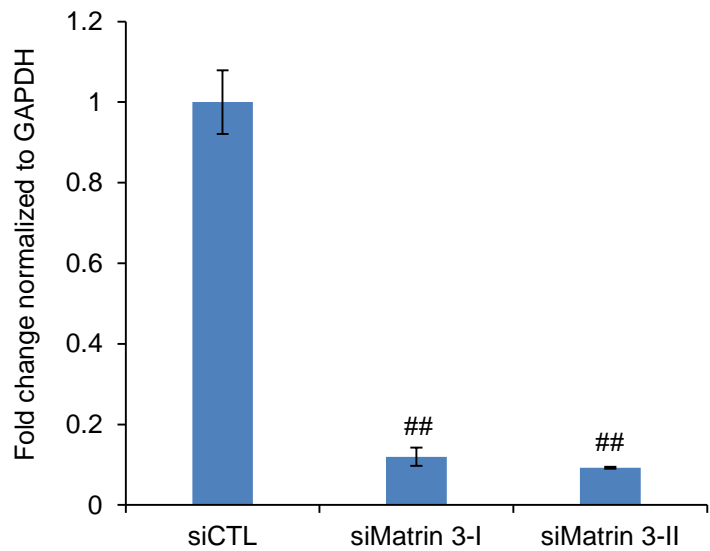

**Figure 5 – figure supplement 1.** (A, B) Putative Matrin 3 binding motif in *PINCR* RNA. (A) “N” represents the number of times the motif appears in the *PINCR* RNA. “ES” represents the enrichment score calculated as shown in “B”. (C) HCT116 cells were reverse transfected with a control siRNA (siCTL) or siRNAs targeting Matrin 3 (siMatrin 3-I and siMatrin 3-II) for 48 hr and the extent of Matrin 3 knockdown was measured by qRT-PCR for Matrin 3 normalized to GAPDH. Error bars represent SD from 3 independent experiments. ##p<0.001.
