# Supplementary material for: Prosurvival long noncoding RNA PINCR regulates a subset of p53 targets in human colorectal cancer cells by binding to Matrin 3
Source: eLife journal article supplement (doi:10.7554/elife.23244), 2017-06-05
Supplement: supp [file elife-23244-supp-v1.zip]

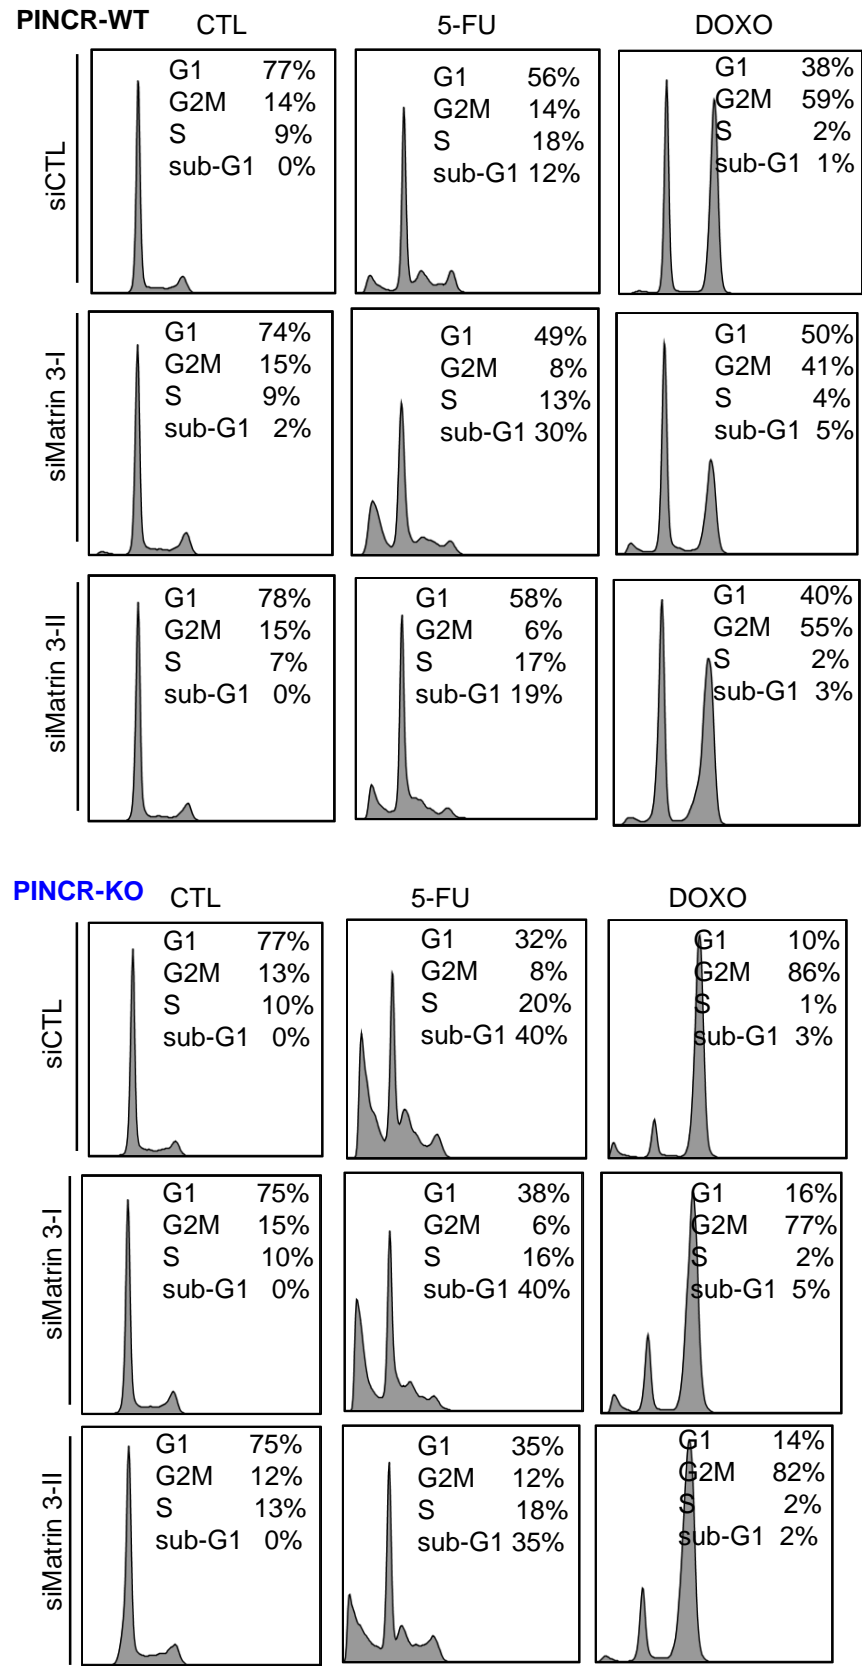

**Figure 5 – figure supplement 3.** Raw cell cycle profiles from a representative experiment for Figure 5F and Figure 5 – figure supplement 3 are shown.
