# Supplementary material for: Prosurvival long noncoding RNA PINCR regulates a subset of p53 targets in human colorectal cancer cells by binding to Matrin 3
Source: eLife journal article supplement (doi:10.7554/elife.23244), 2017-06-05
Supplement: supp [file elife-23244-supp-v1.zip]

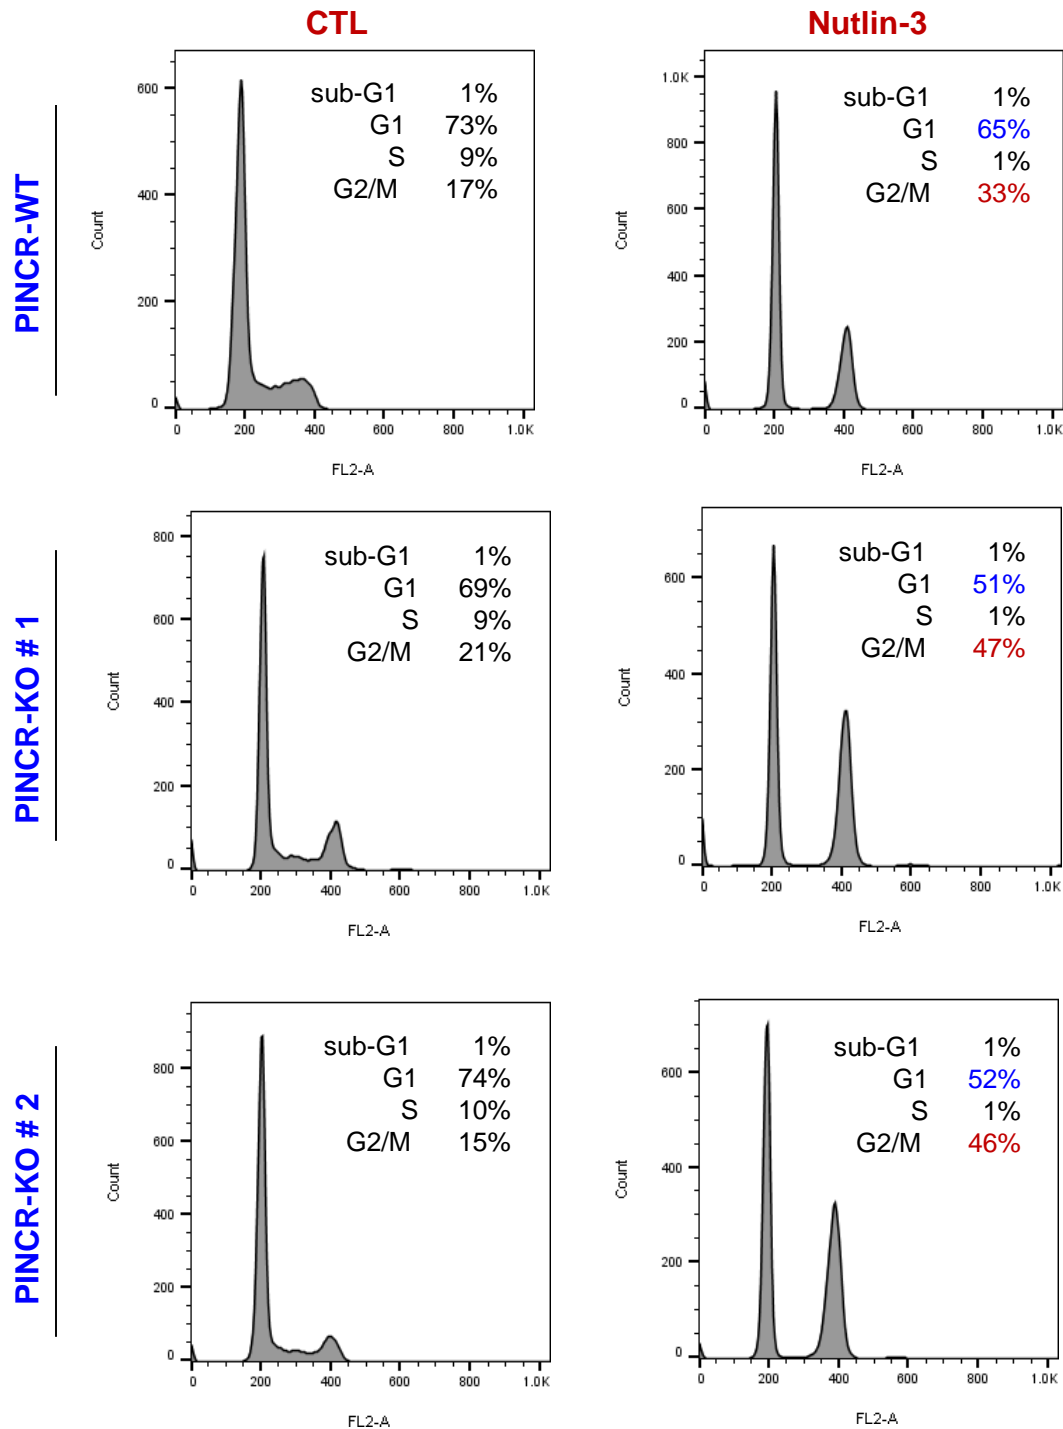

**Figure 2 – figure supplement 5. Loss of *PINCR* results in reduced G1 arrest after Nutlin-3 treatment.** *PINCR*-WT and *PINCR*-KO clones were untreated or treated with Nutlin-3 for 24 hr and the cell cycle profiles were examined by PI-staining and FACS analysis.
