# Supplementary material for: Prosurvival long noncoding RNA PINCR regulates a subset of p53 targets in human colorectal cancer cells by binding to Matrin 3
Source: eLife journal article supplement (doi:10.7554/elife.23244), 2017-06-05
Supplement: supp [file elife-23244-supp-v1.zip]

A

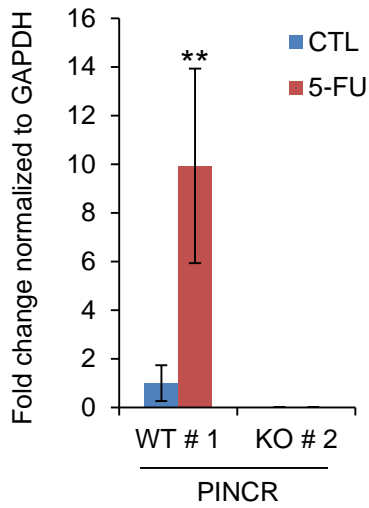

B

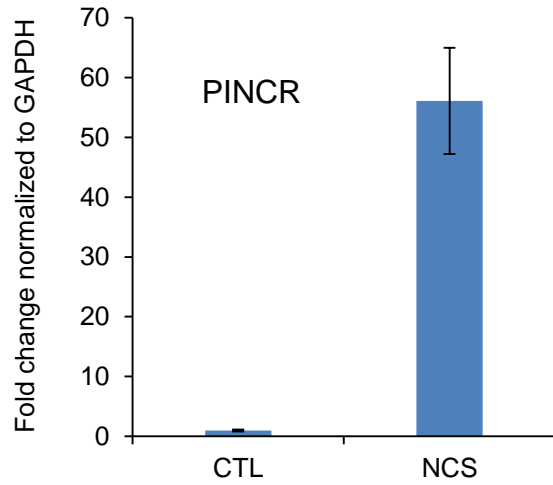

**Figure 3 – figure supplement 1.** (A) qRT-PCR analysis from *PINCR*-WT and *PINCR*-KO cells untreated or treated with 5-FU for 24 hr. (B) qRT-PCR for *PINCR* from HCT116 cells untreated or treated with NCS for 24 hr. Error bars represent SD from three biological replicates. \*\* $p < 0.005$
