# Supplementary material for: Prosurvival long noncoding RNA PINCR regulates a subset of p53 targets in human colorectal cancer cells by binding to Matrin 3
Source: eLife journal article supplement (doi:10.7554/elife.23244), 2017-06-05
Supplement: supp [file elife-23244-supp-v1.zip]

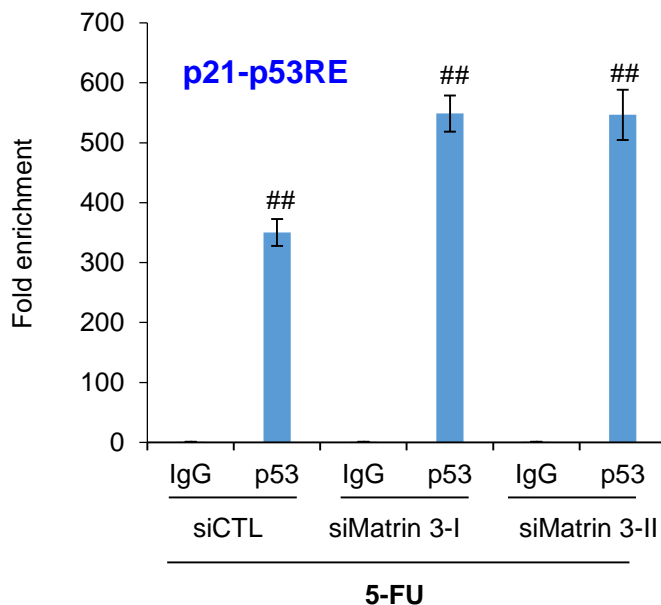

**Figure 6 – figure supplement 2.**

*PINCR*-WT HCT116 cells were reverse transfected with a control siRNA (siCTL) or siRNAs targeting Matrin 3 (siMatrin 3-I and siMatrin 3-II) for 48 hr. Transfected cells were treated with 5-FU for 24 hr and the binding of p53 to the p53RE of the p21 promoter was determined by ChIP-qPCR. Error bars represent SD from 3 independent experiments. ## $p < 0.001$ .
