# Supplementary material for: Prosurvival long noncoding RNA PINCR regulates a subset of p53 targets in human colorectal cancer cells by binding to Matrin 3
Source: eLife journal article supplement (doi:10.7554/elife.23244), 2017-06-05
Supplement: supp [file elife-23244-supp-v1.zip]

# Comparative analysis and conservation of human *PINCR* gene

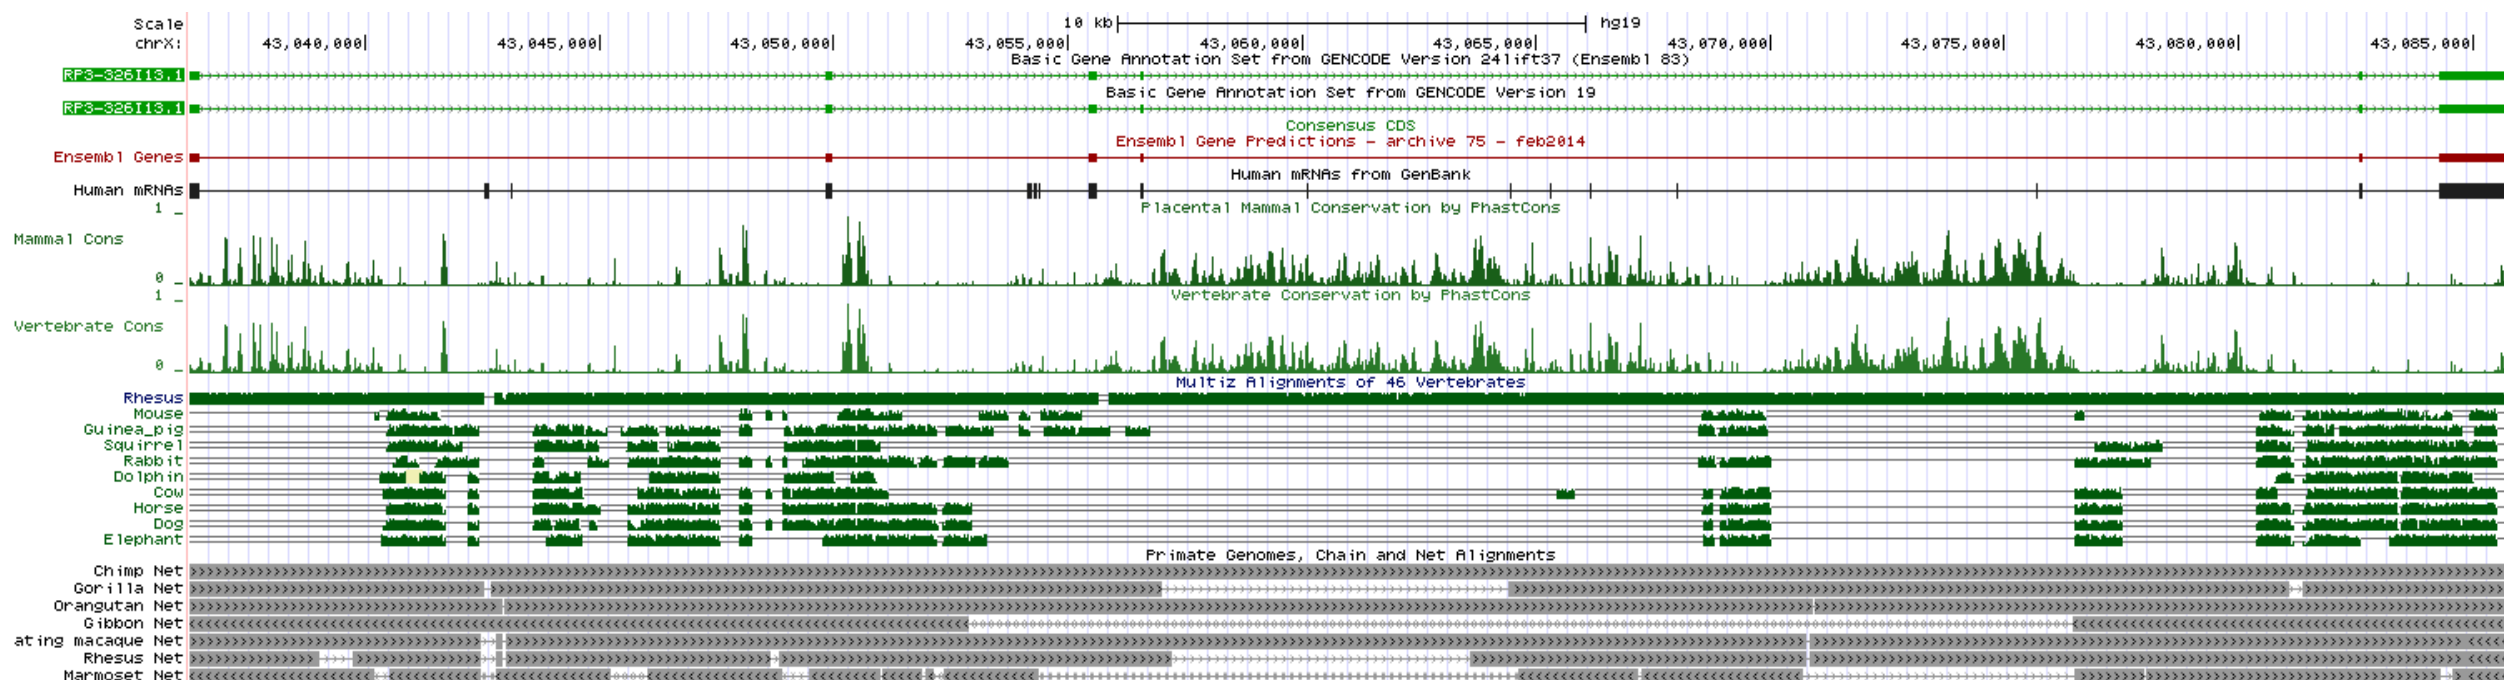

**Figure 1 - figure supplement 6.** Schematic diagrams of *PINCR* (RP3-326I12.1) genomic DNA alignments include multiple alignment of some mammalian species from the “Multiz Alignments of 46 Vertebrates” track (shown in green), measurements of evolutionary conservation by the PhastCons method (Mammal Cons, Vertebrate Cons), and primate genomes (net track, grey) alignments. The net track shows the best human/other chain for *PINCR* genomic DNA. In the graphical display of primate genomes alignment, the boxes represent ungapped alignments and the line represent gaps. The diagram was downloaded and adapted from the UCSC Genome Browser (<https://genome.ucsc.edu>).
