# Supplementary material for: Prosurvival long noncoding RNA PINCR regulates a subset of p53 targets in human colorectal cancer cells by binding to Matrin 3
Source: eLife journal article supplement (doi:10.7554/elife.23244), 2017-06-05
Supplement: supp [file elife-23244-supp-v1.zip]

A

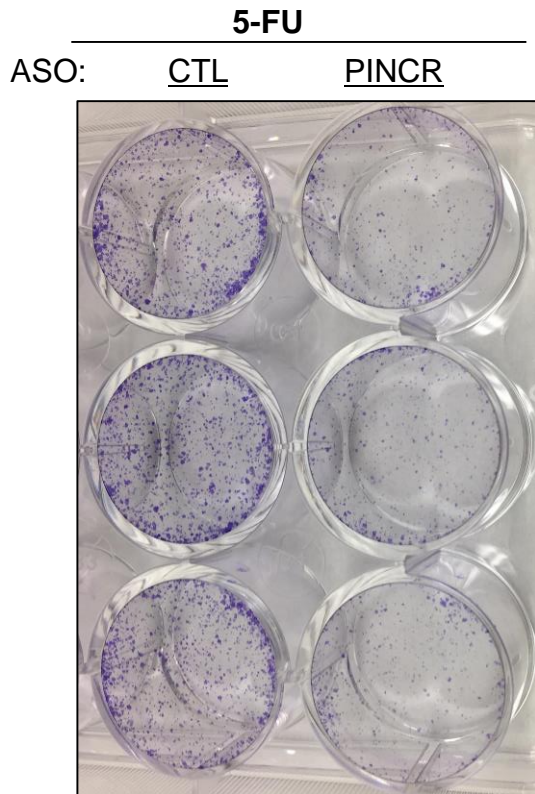

B

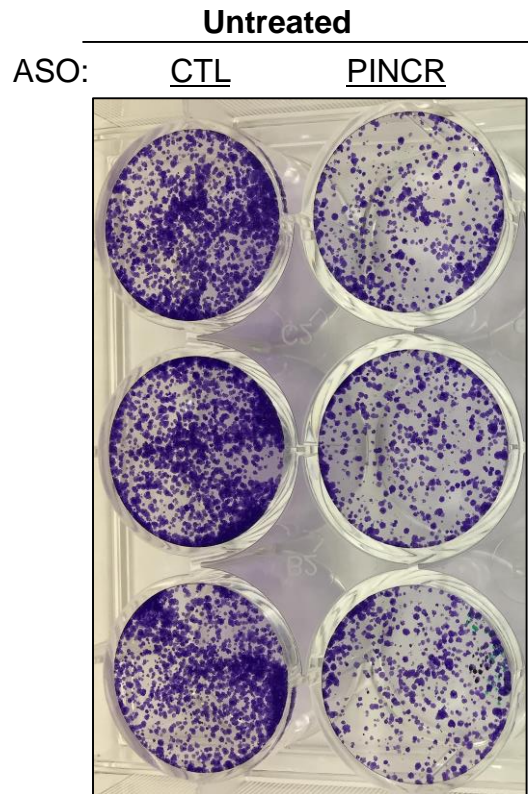

**Figure 4 – figure supplement 6. Knockdown of *PINCR* results in reduced colony formation.** Colony formation assays were performed from HCT116 cells that were treated with 5-FU for 4 hr (A) or untreated (B) after knockdown of *PINCR* with *PINCR*-ASO. CTL refers to control (CTL) ASO.
