# Supplementary material for: Prosurvival long noncoding RNA PINCR regulates a subset of p53 targets in human colorectal cancer cells by binding to Matrin 3
Source: eLife journal article supplement (doi:10.7554/elife.23244), 2017-06-05
Supplement: supp [file elife-23244-supp-v1.zip]

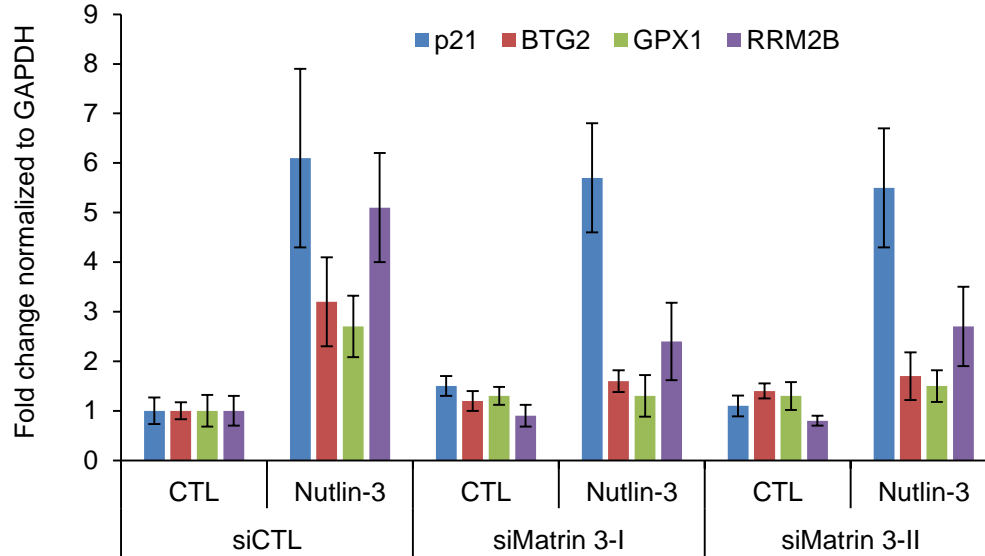

**Figure 5 – figure supplement 4. Matrin 3 regulates the induction of *PINCR* targets upon p53 activation by Nutlin-3.**

*PINCR*-WT HCT116 cells were reverse transfected with CTL siRNA or Matrin-3 siRNAs for 48 hr and then treated with Nutlin-3 for 24 hr. The expression of *PINCR* targets and the negative control *p21*, was assessed by qRT-PCR. Error bars represent SD from 2 independent experiments.
