# Supplementary material for: Prosurvival long noncoding RNA PINCR regulates a subset of p53 targets in human colorectal cancer cells by binding to Matrin 3
Source: eLife journal article supplement (doi:10.7554/elife.23244), 2017-06-05
Supplement: supp [file elife-23244-supp-v1.zip]

Archive with 57 entries (57 files):
- elife_poa_e23244_Figure_7_Figure_Supplement_1.pdf
- elife_poa_e23244_Figure_5_Figure_Supplement_4.pdf
- elife_poa_e23244_Supplementary_File_3.xls
- elife_poa_e23244_Figure_1_Figure_Supplement_6.pdf
- elife_poa_e23244_Figure_8_Figure_Supplement_3.pdf
- elife_poa_e23244_Figure_3_Figure_Supplement_1.pdf
- elife_poa_e23244_Figure_5_Figure_Supplement_2.pdf
- elife_poa_e23244_Figure_3_Figure_Supplement_6.pdf
- elife_poa_e23244_Figure_4_Figure_Supplement_4.pdf
- elife_poa_e23244_Figure_2_Figure_Supplement_5.pdf
- elife_poa_e23244_Figure_5_Source_Data_1.docx
- elife_poa_e23244_Supplementary_File_4.xls
- elife_poa_e23244_Figure_1_Figure_Supplement_5.pdf
- elife_poa_e23244_Figure_4_figure_supplement_1_Source_Data_1.docx
- elife_poa_e23244_Figure_1_Figure_Supplement_2.pdf
- elife_poa_e23244_Figure_3_Figure_Supplement_4.pdf
- elife_poa_e23244_Figure_3_Figure_Supplement_3.pdf
- elife_poa_e23244_Supplementary_File_2.xls
- elife_poa_e23244_Figure_1_Figure_Supplement_3.pdf
- elife_poa_e23244_Figure_6_Source_Data_1.docx
- elife_poa_e23244_Figure_4_Figure_Supplement_1.pdf
- elife_poa_e23244_Figure_2_Figure_Supplement_3.pdf
- elife_poa_e23244_Figure_1_figure_supplement_1_Source_Data_1.docx
- elife_poa_e23244_Figure_2_figure_supplement_1.pdf
- elife_poa_e23244_Supplementary_File_5.xls
- elife_poa_e23244_Supplementary_File_6.xls
- elife_poa_e23244_Figure_3_figure_supplement_7_Source_Data_1.docx
- elife_poa_e23244_Figure_3_Source_Data_1.docx
- elife_poa_e23244_Supplementary_File_1.xls
- elife_poa_e23244_Figure_8_Source_Data_1.docx
- elife_poa_e23244_Figure_7_Figure_Supplement_2.pdf
- elife_poa_e23244_Figure_8_figure_supplement_5_Source_Data_1.docx
- elife_poa_e23244_Figure_4_figure_supplement_2_Source_Data_1.docx
- elife_poa_e23244_Figure_2_Figure_Supplement_4.pdf
- elife_poa_e23244_Figure_3_Figure_Supplement_7.pdf
- elife_poa_e23244_Figure_2_Figure_Supplement_2.pdf
- elife_poa_e23244_Figure_8_Figure_Supplement_5.pdf
- elife_poa_e23244_Figure_5_figure_supplement_5_Source_Data_1.docx
- elife_poa_e23244_Figure_4_Figure_Supplement_2.pdf
- elife_poa_e23244_Figure_8_Figure_Supplement_4.pdf
- elife_poa_e23244_Figure_5_Figure_Supplement_5.pdf
- elife_poa_e23244_Figure_3_Figure_Supplement_5.pdf
- elife_poa_e23244_Figure_4_Figure_Supplement_5.pdf
- elife_poa_e23244_Figure_3_Figure_Supplement_2.pdf
- elife_poa_e23244_Figure_1_Figure_Supplement_1.pdf
- elife_poa_e23244_Figure_8_Figure_Supplement_2.pdf
- elife_poa_e23244_Figure_6_Figure_Supplement_1.pdf
- elife_poa_e23244_Figure_6_figure_supplement_1_Source_Data_1.docx
- elife_poa_e23244_Figure_4_Figure_Supplement_6.pdf
- elife_poa_e23244_Figure_5_Figure_Supplement_1.pdf
- elife_poa_e23244_Figure_6_Figure_Supplement_2.pdf
- elife_poa_e23244_Figure_1_Figure_Supplement_4.pdf
- elife_poa_e23244_Figure_1_figure_supplement_6_Source_Data_2.docx
- elife_poa_e23244_Figure_5_Figure_Supplement_3.pdf
- elife_poa_e23244_Figure_1_figure_supplement_6_Source_Data_1.docx
- elife_poa_e23244_Figure_8_Figure_Supplement_1.pdf
- elife_poa_e23244_Figure_4_Figure_Supplement_3.pdf
