# Supplementary material for: Prosurvival long noncoding RNA PINCR regulates a subset of p53 targets in human colorectal cancer cells by binding to Matrin 3
Source: eLife journal article supplement (doi:10.7554/elife.23244), 2017-06-05
Supplement: supp [file elife-23244-supp-v1.zip › elife_poa_e23244_Figure_2_figure_supplement_1.pdf]

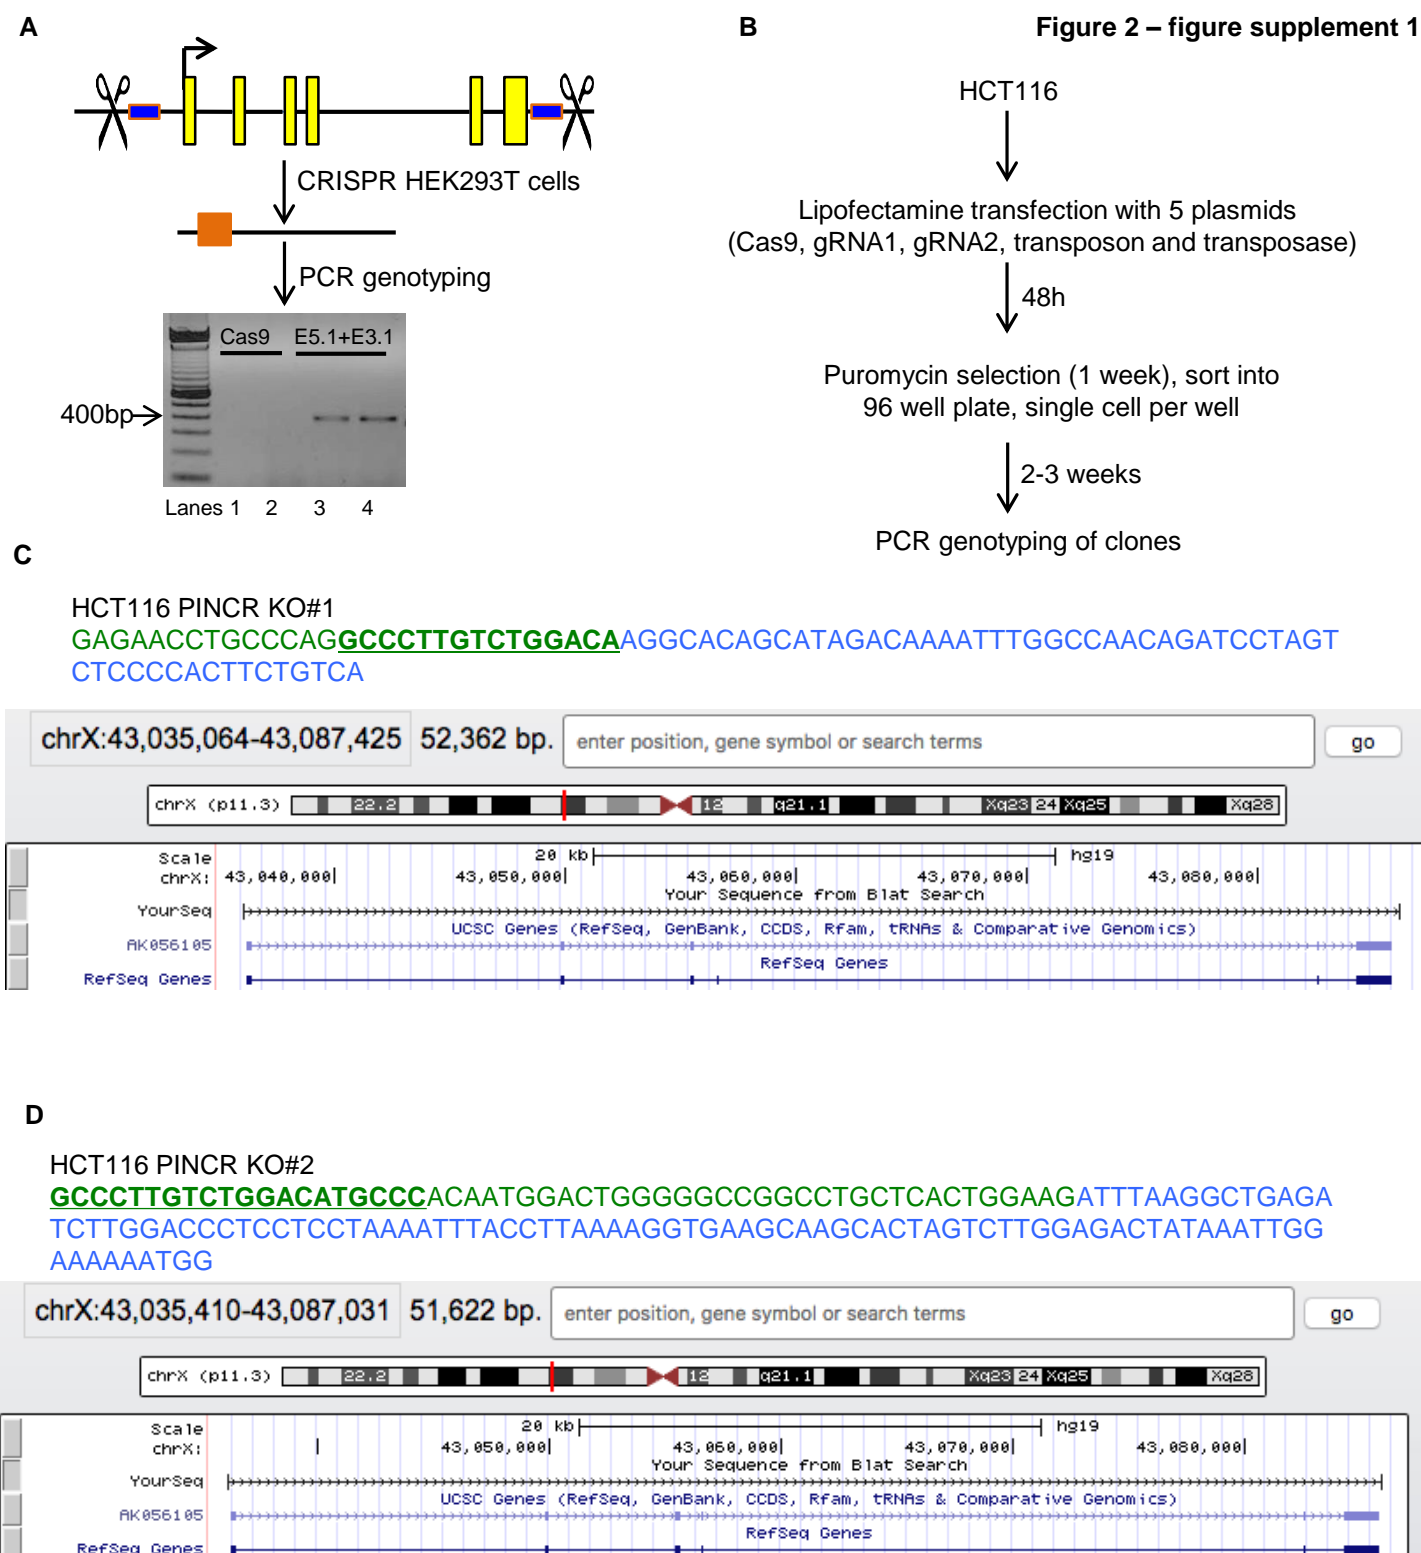

**Figure 2 – figure supplement 1.** (A) Pictorial representation of *PINCR* genomic locus. Yellow boxes represent annotated exons and blue boxes represent regions targeted by gRNAs (E5.1 and E3.1). HEK293T cells were transfected with Cas9 alone (Lanes 1 and 2) or Cas9 along with gRNAs E5.1 and E3.1 (Lanes 3 and 4). Deletion was confirmed by genomic PCR using *PINCR*-CRISPR analysis primers. (B) Schematic of generation of *PINCR*-KO HCT116 cells. (C, D) Partial genomic sequence of *PINCR* from Sanger sequencing and snap-shot of *PINCR* locus (using BLAT) for the *PINCR*-KO#1 and *PINCR*-KO#2 HCT116 clones is shown. The p53RE is underlined and in green font.
