# Supplementary material for: Prosurvival long noncoding RNA PINCR regulates a subset of p53 targets in human colorectal cancer cells by binding to Matrin 3
Source: eLife journal article supplement (doi:10.7554/elife.23244), 2017-06-05
Supplement: supp [file elife-23244-supp-v1.zip › elife_poa_e23244_Figure_2_Figure_Supplement_2.pdf]

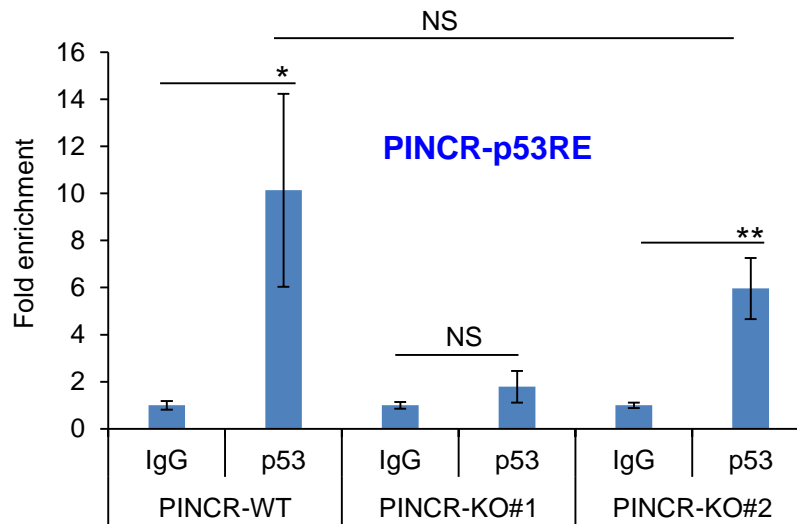

**Figure 2 – figure supplement 2.** p53 binding to the p53RE of *PINCR* in *PINCR*-WT and *PINCR*-KO cells was assessed by ChIP-qPCR from HCT116 cells (*PINCR*-WT or *PINCR*-KO) treated with 5-FU for 24 hr. Fold enrichment relative to IgG is shown.
