# Supplementary material for: Prosurvival long noncoding RNA PINCR regulates a subset of p53 targets in human colorectal cancer cells by binding to Matrin 3
Source: eLife journal article supplement (doi:10.7554/elife.23244), 2017-06-05
Supplement: supp [file elife-23244-supp-v1.zip › elife_poa_e23244_Figure_3_Figure_Supplement_2.pdf]

A

SW48 PINCR KO

CCTGCCCAGGCCCT(T/C)GTCNTGGACATGG(C/T)(A/T)CAGC(A/G)TAT(T/G)ACAAAATT(T/G)GGCC  
 AACA(T/G)ATCCTAGTC(T/A)CCCCACTTC(T/G)G

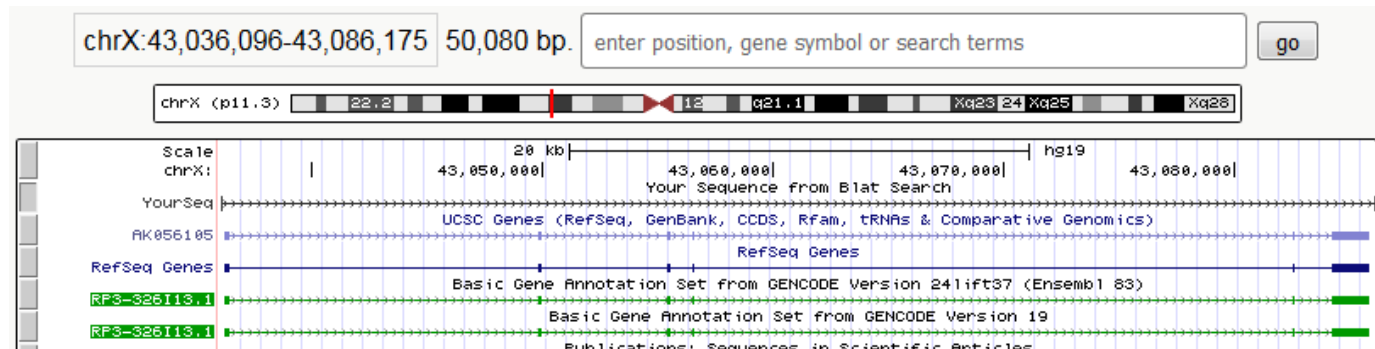

B

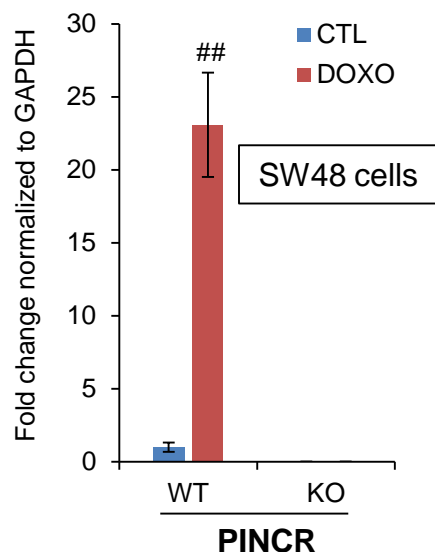

**Figure 3 – figure supplement 2.** (A) Partial genomic sequence of *PINCR* from Sanger sequencing and snapshot of *PINCR* locus (using BLAT) for the *PINCR*-KO SW48 clone is shown. The p53RE is underlined and in green font. (B) qRT-PCR analysis from *PINCR*-WT and *PINCR*-KO SW48 cells untreated or treated with 5-FU for 24 hr. Error bars represent SD from three experiments.  $^{##}p < 0.001$ .
