# Supplementary material for: Prosurvival long noncoding RNA PINCR regulates a subset of p53 targets in human colorectal cancer cells by binding to Matrin 3
Source: eLife journal article supplement (doi:10.7554/elife.23244), 2017-06-05
Supplement: supp [file elife-23244-supp-v1.zip › elife_poa_e23244_Figure_3_Figure_Supplement_3.pdf]

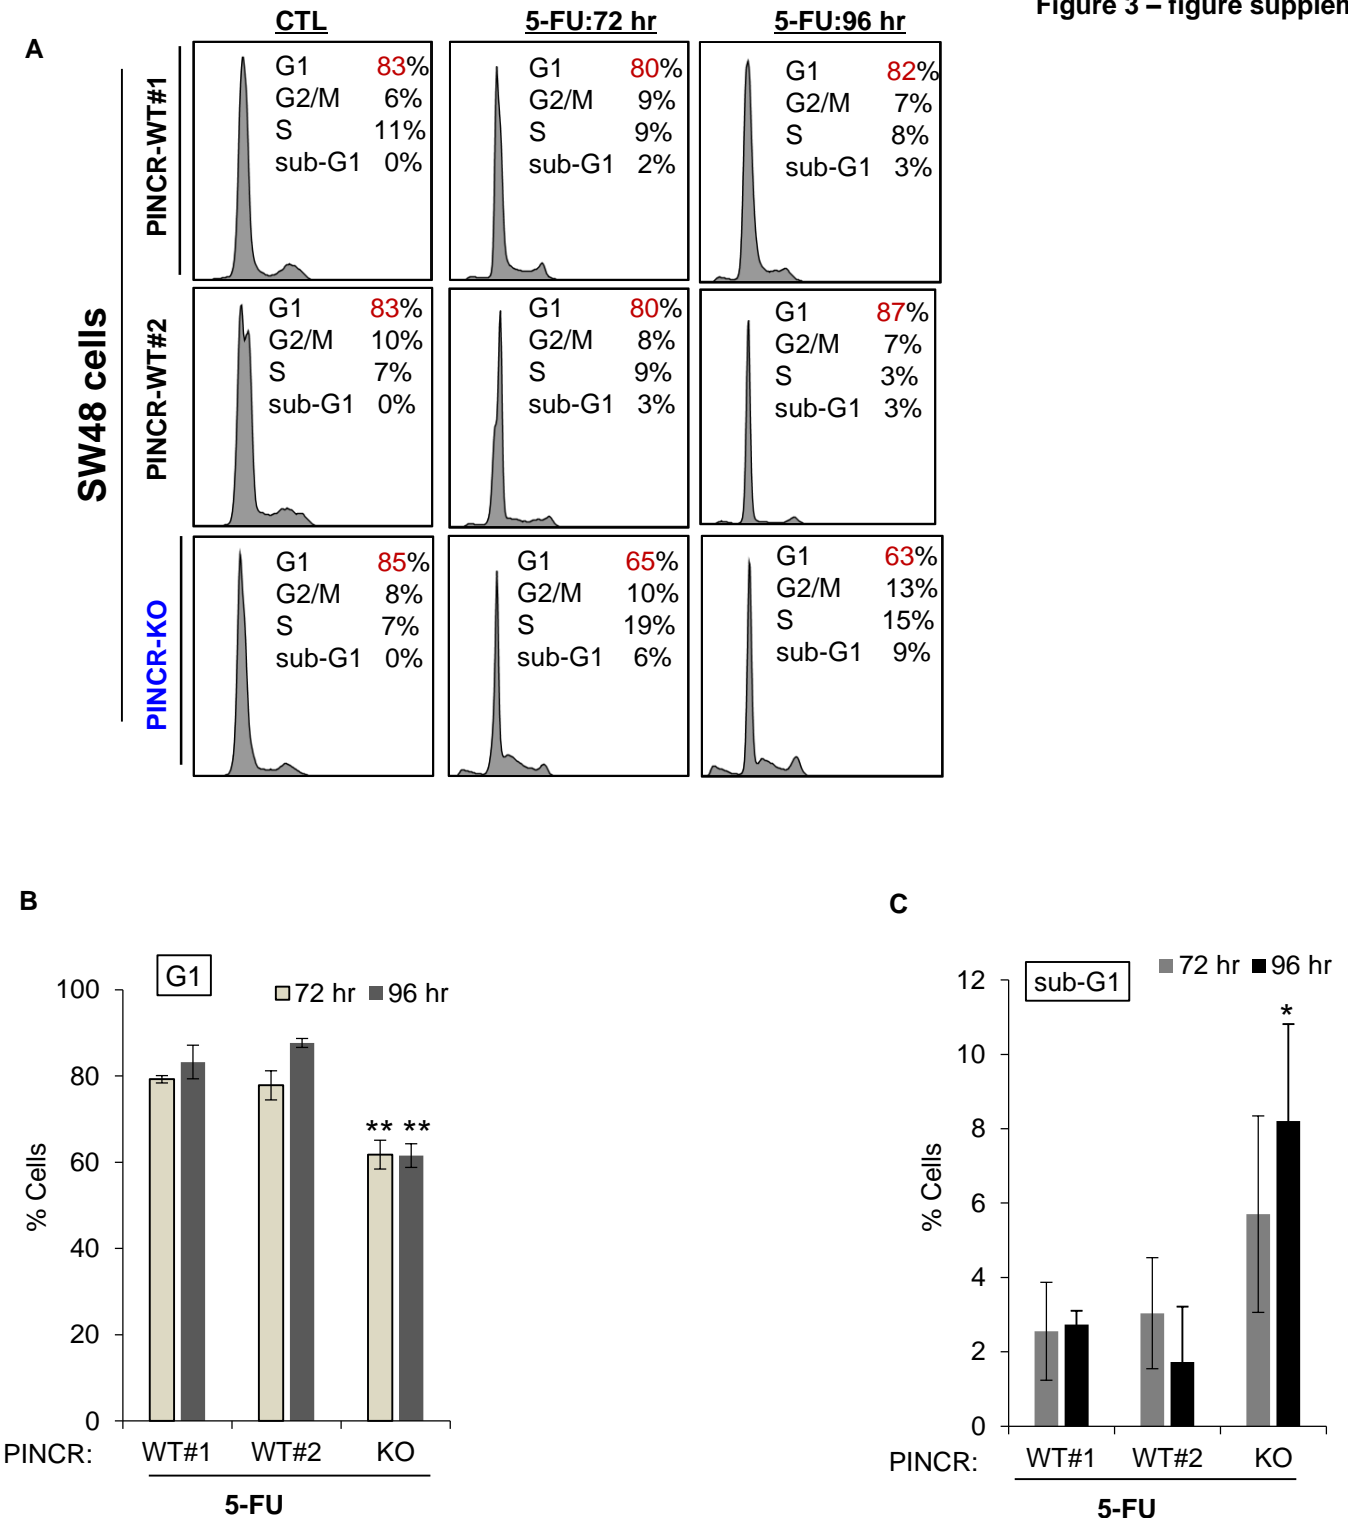

**Figure 3 – figure supplement 3.** *PINCR*-WT and *PINCR*-KO SW48 cells were untreated or treated with 5-FU for 72 hr or 96 hr and the effect on cell cycle and apoptosis was determined by PI-staining and FACS analysis. Raw cell cycle profiles from a representative experiment are shown in (A) and the results from 3 independent experiments are shown in (B,C). Error bars represent SD from three experiments. \* $p < 0.05$ ; \*\* $p < 0.005$
