# Supplementary material for: Prosurvival long noncoding RNA PINCR regulates a subset of p53 targets in human colorectal cancer cells by binding to Matrin 3
Source: eLife journal article supplement (doi:10.7554/elife.23244), 2017-06-05
Supplement: supp [file elife-23244-supp-v1.zip › elife_poa_e23244_Figure_5_Figure_Supplement_2.pdf]

A

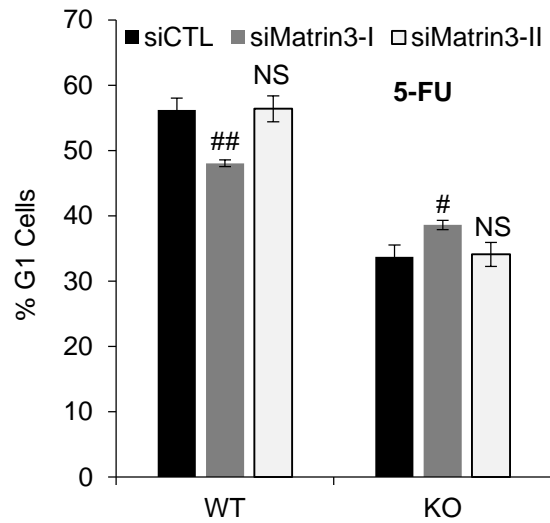

B

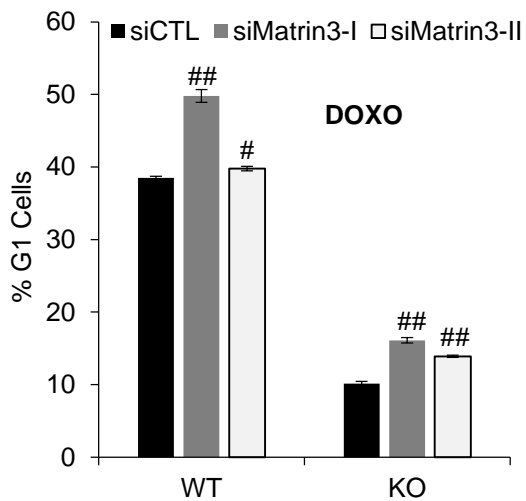

C

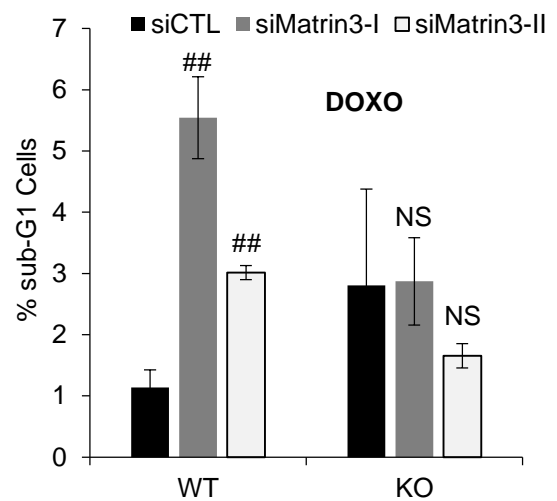

### Figure 5 – figure supplement 2.

*PINCR*-WT and *PINCR*-KO HCT116 cells were reverse transfected with a control siRNA (siCTL) or siRNAs targeting Matrin 3 (siMatrin 3-I and siMatrin 3-II) for 48 hr. Transfected cells were left untreated or treated with DOXO or 5-FU for 48 hr. The effect on G1 arrest and apoptosis was examined by PI-staining and FACS analysis. Shown are the results from 3 independent experiments after 5-FU treatment (A) or DOXO treatment (B, C). Error bars represent SD from 3 independent experiments. # $p < 0.01$ , ## $p < 0.001$ .
