# Supplementary material for: Prosurvival long noncoding RNA PINCR regulates a subset of p53 targets in human colorectal cancer cells by binding to Matrin 3
Source: eLife journal article supplement (doi:10.7554/elife.23244), 2017-06-05
Supplement: supp [file elife-23244-supp-v1.zip › elife_poa_e23244_Figure_5_Figure_Supplement_5.pdf]

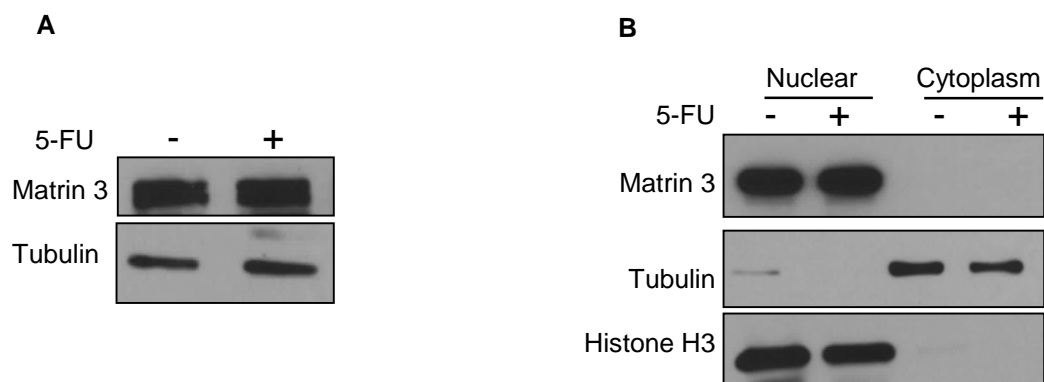

**Figure 5 – figure supplement 5. Matrin 3 protein level and subcellular localization is not altered after DNA damage.**

HCT116 cells were untreated or treated with 5-FU for 24 hr and immunoblotting for Matrin 3 was performed from whole cell extracts (A) or nuclear and cytoplasmic extracts (B). Tubulin was used as loading control for (A). For (B) Histone H3 was used as nuclear marker and Tubulin was used as cytoplasmic marker.
