# Supplementary material for: Prosurvival long noncoding RNA PINCR regulates a subset of p53 targets in human colorectal cancer cells by binding to Matrin 3
Source: eLife journal article supplement (doi:10.7554/elife.23244), 2017-06-05
Supplement: supp [file elife-23244-supp-v1.zip › elife_poa_e23244_Figure_6_Figure_Supplement_1.pdf]

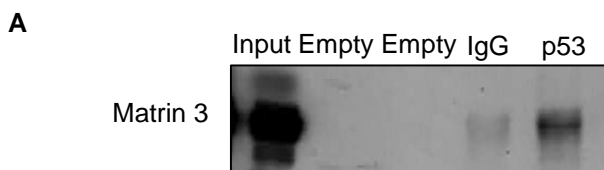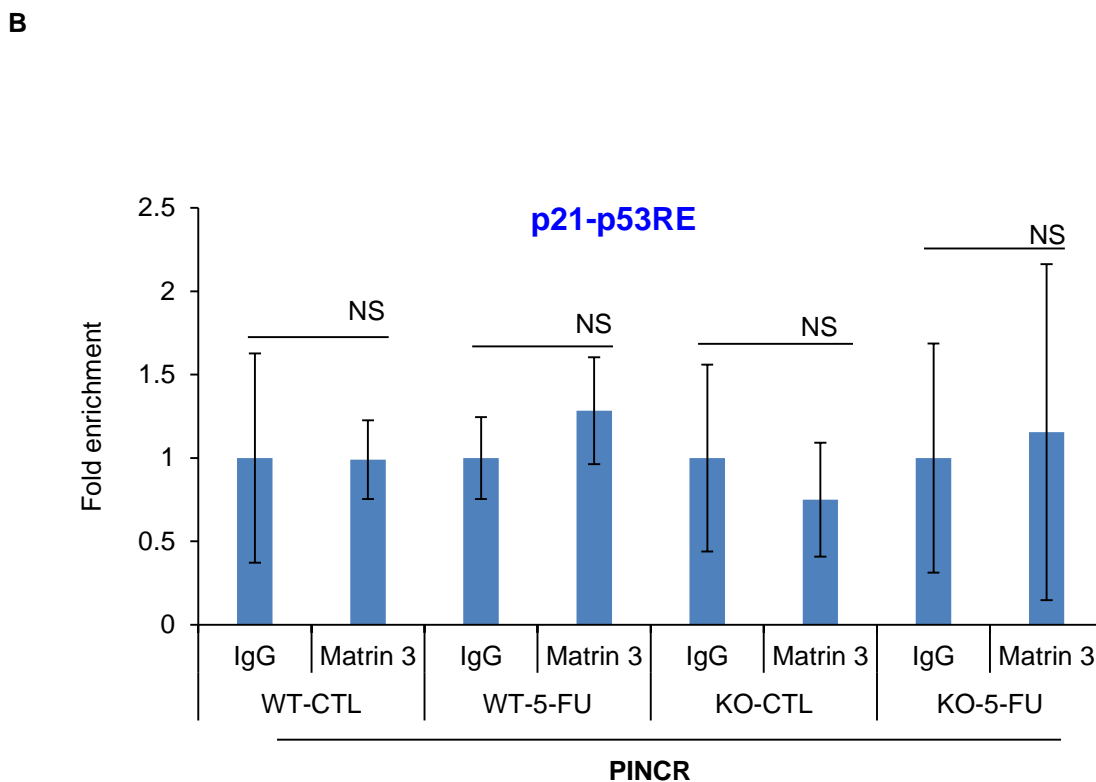

**Figure 6 – figure supplement 1.** (A) Co-IP was performed from HCT116 cells in which nuclear extracts were incubated with IgG or p53 antibody and immunoblotting for Matrin 3 was performed. (B) Matrin 3 ChIP-qPCR was performed from *PINCR*-WT and *PINCR*-KO cells treated with 5-FU and the association with the p53RE in the *p21* promoter was determined. Error bars represent SD from three experiments.
