# Supplementary material for: Prosurvival long noncoding RNA PINCR regulates a subset of p53 targets in human colorectal cancer cells by binding to Matrin 3
Source: eLife journal article supplement (doi:10.7554/elife.23244), 2017-06-05
Supplement: supp [file elife-23244-supp-v1.zip › elife_poa_e23244_Figure_8_Figure_Supplement_1.pdf]

Alignment of Sequence\_1: [LOC101927501 Target.xdna] with Sequence\_2: [Clone 7].

Similarity : 167/343 (48.69 %)

Seq\_1 1 CTCTCCCTTGCTCCCTCTCTTGCCATGTGACATGCTTGCTCCAGCTGCACCTTTTGCCAC 60  
Seq\_2 1 CTCTCCCTTGCTCCCTCTCTTGCCATGTGACATGCTTGCTCCAGCTGCACCTTTTGCCAC 60

Seq\_1 61 AATTGTAAGCTTTGTGAGTCCCTCAACAGAAGCTGAGCAAATGCTGGCACCATGCTTCTT 120  
Seq\_2 61 AATTGTAAGCTTTGTGAGTCCCTCAACAGAAGCTGAGCAAATGCTGGCACCATGCTTCTT 120

Seq\_1 121 GTACAGCCTaca-gaactgtgaaccaaata----- 149  
Seq\_2 121 GTACAGCCTACATGTA-GGGGATCCACCGACCAGAATCATGCAAGTGCCTAAGATAGTCG 179

Seq\_1 150 -----AACTTTTATTTTATAAATTATCTAGCCTCAGGTATTCTTTATAGCAAT 200  
Seq\_2 180 CGGGCCGGGAAACTTTTATTTTAT----- 204

Seq\_1 201 GCAAAACAACTAACACACCCTTAAACCCTATATTTAAGGCTGAGATCTTGACCCCTCCT 260  
Seq\_2 205 -----GG--ATCCG-TAAGTAAG----- 220

Seq\_1 261 CCTAAAATTTACCTTAAAAGGTGAAGCAAGCACTAGTCTTGAGACTATAAATTGGAAAA 320  
Seq\_2 221 ----- 220

**Figure 8 – figure supplement 1.** Sequence alignment of gDNA from *PINCR* (Seq\_1) and *PINCR*-S1 (Seq\_2) clones. Yellow is the 44 nucleotide S1-tag inserted in *PINCR*-S1.
