# Supplementary material for: Prosurvival long noncoding RNA PINCR regulates a subset of p53 targets in human colorectal cancer cells by binding to Matrin 3
Source: eLife journal article supplement (doi:10.7554/elife.23244), 2017-06-05
Supplement: supp [file elife-23244-supp-v1.zip › elife_poa_e23244_Supplementary_File_1.xls]

## Sheet: Supplementary File 1
Supplementary File 1. Transcripts induced upon Nutlin treatment of parental HCT116, RKO and SW48 cells.
Symbol	Accession	probeset_id	RKOp53wt.Ctl_vs_Nutlin3a:FoldChange	RKOp53wt.Ctl_vs_Nutlin3a:P.Value	RKOp53wt.Ctl_vs_Nutlin3a:adj.P.Val	SW48p53wt.Ctl_vs_Nutlin3a:FoldChange	SW48p53wt.Ctl_vs_Nutlin3a:P.Value	SW48p53wt.Ctl_vs_Nutlin3a:adj.P.Val	HCT116p53wt.Ctl_vs_Nutlin-3a:FoldChange	HCT116p53wt.Ctl_vs_Nutlin-3a:P.Value	HCT116p53wt.Ctl_vs_Nutlin-3a:adj.P.Val	chr	strand	start	stop	total_probes	HCT116p53wt_Ctl_1	HCT116p53wt_Ctl_2	HCT116p53wt_Nutlin_3a_1	HCT116p53wt_Nutlin_3a_2	SW48p53wt_Ctl_1	SW48p53wt_Ctl_2	SW48p53wt_Nutlin_3a_1	SW48p53wt_Nutlin_3a_2	RKOp53wt_Ctl_1	RKOp53wt_Ctl_2	RKOp53wt_Nutlin_3a_1	RKOp53wt_Nutlin_3a_2
MIR3189	NR_036156	16859800	6.067	0	0.004	3.711	0	0.012	6.316	0	0.002	chr19	+	18497372	18497444	9	5.49066	5.55554	8.25325	8.11183	4.83519	4.63025	6.41349	6.83576	5.14368	5.16625	7.76109	7.75083
TP53INP1	ENST00000342697	17079317	3.719	0	0.018	3.306	0	0.003	5.583	0	0.002	chr8	-	95937778	95961639	24	7.87063	7.93416	10.3825	10.384	8.5441	8.38317	10.1835	10.1942	7.6833	7.86774	9.66712	9.67392
LOC643401	NR_038848	16983611	3.458	0	0.018	2.519	0	0.029	2.898	0	0.01	chr5	+	27472391	27496508	23	5.63364	5.62361	7.30648	7.01994	5.05201	4.95126	6.11555	6.55392	7.05714	7.0064	8.90444	8.73952
RP3-326I13.1	---	17102819	2.563	0	0.039	1.866	0	0.014	5.748	0	0.003	chrX	+	43036243	43085847	17	3.68802	3.47523	5.99402	6.21567	3.6731	3.65802	4.60375	4.52758	3.80649	3.68686	4.96234	5.24654
AC003088.1	---	17061853	1.465	0.001	0.197	0.994	0.923	0.98	3.387	0	0.007	chr7	-	110072296	110174811	19	4.62246	4.74534	6.57161	6.31655	4.6272	4.63602	4.7031	4.54218	4.59026	4.61143	5.20002	5.10341
RP11-347C18.3	---	17071079	2.523	0	0.023	2.313	0	0.026	2.474	0	0.007	chr8	+	95962265	95963624	20	6.83669	6.85466	8.23501	8.07032	6.96122	6.97466	7.99152	8.36514	8.06171	8.15144	9.40397	9.47872
RP11-134G8.8	---	16697927	2.986	0	0.018	3.565	0	0.002	3.371	0	0.006	chr1	-	201433511	201434274	16	5.73055	5.81126	7.40632	7.64061	6.79622	6.78001	8.60112	8.64278	6.77537	6.6948	8.26809	8.35714
RP11-467J12.4	---	16826529	1.387	0.016	0.436	1.891	0	0.012	3.067	0	0.024	chr16	-	53073299	53078119	21	5.09377	5.08506	6.46908	6.94326	4.5834	4.57083	5.49313	5.4982	4.49002	4.80986	5.2329	5.01197
LOC100129550	NR_024618	16944736	1.064	0.399	0.798	0.985	0.805	0.951	1.529	0.002	0.12	chr3	+	122605360	122611263	23	6.68201	6.685	7.15833	7.43459	7.21705	7.09515	7.16961	7.09808	6.99753	6.82318	6.94268	7.05778
	---	16691787	3.326	0	0.029	1.426	0.01	0.323	1.21	0.01	0.234	chr1	-	143118704	143211070	8	2.7797	2.7645	3.0232	3.07166	3.27339	2.85955	3.53319	3.62432	4.66149	4.31057	6.16272	6.27803
ACER2	NM_001010887	17083900	3.265	0	0.018	2.089	0	0.013	3.55	0	0.003	chr9	+	19408925	19452500	21	7.69765	7.84241	9.57933	9.61706	9.11752	9.12547	10.0964	10.2724	8.43024	8.44052	10.147	10.138
GRHL3	NM_198173	16660757	3.24	0	0.028	1.11	0.21	0.681	2.141	0	0.032	chr1	+	24645812	24690972	12	5.22926	5.16218	6.44982	6.13677	9.90104	9.68126	9.86555	10.0169	5.74661	5.75979	7.28301	7.61535
	---	17069515	3.233	0	0.029	1.394	0.005	0.258	1.436	0.009	0.227	chr8	+	67024902	67027414	20	4.46492	4.8517	5.19643	5.1643	4.71685	4.87245	5.39966	5.14772	5.31663	5.28627	6.81695	7.17153
WDR63	NM_145172	16666694	3.229	0	0.037	2.158	0	0.015	4.199	0	0.003	chr1	+	85464830	85598821	22	5.75036	5.83571	7.79475	7.932	4.89069	5.10831	6.07778	6.14173	6.06089	5.72653	7.47858	7.69167
BTG2	NM_006763	16676150	2.936	0	0.023	3.359	0	0.004	4.435	0	0.002	chr1	+	203274619	203278730	24	8.28683	8.23713	10.3894	10.432	8.59225	8.47452	10.1889	10.3744	9.08259	9.13858	10.56	10.7682
FBXW7	NM_033632	16980693	2.759	0	0.018	1.652	0	0.026	1.992	0	0.015	chr4	-	153242410	153456172	31	7.44424	7.55331	8.53788	8.44795	7.25056	7.30732	8.01505	7.99171	7.70512	7.67809	9.13097	9.18116
SESN1	NM_014454	17022362	2.708	0	0.02	3.222	0	0.004	3.688	0	0.003	chr6	-	109307640	109416022	30	6.9296	6.90646	8.83744	8.7646	6.83817	7.01184	8.59648	8.62924	7.78057	7.69747	9.18398	9.16779
BBC3	NM_001127241	16873675	2.667	0	0.028	1.871	0	0.015	2.519	0	0.012	chr19	-	47724079	47736023	19	6.74767	6.99324	8.21528	8.19152	7.02628	7.03499	7.88341	7.98523	6.57675	6.65668	8.15022	7.91375
	---	16767332	2.667	0	0.131	3.837	0	0.011	3.138	0	0.012	chr12	-	69235068	69237017	20	5.98933	6.2383	7.63496	7.89199	5.59056	5.27177	7.51836	7.22453	6.39007	6.4472	7.5696	8.09819
INPP5D	NM_001017915	16892446	2.606	0	0.023	3.699	0	0.002	3.048	0	0.004	chr2	+	233924677	234116549	28	4.98319	5.01823	6.54774	6.6692	5.97512	6.08073	7.9069	7.92304	5.14854	5.0168	6.4776	6.45221
TP53I3	NM_004881	16895179	2.604	0	0.023	2.148	0	0.015	4.585	0	0.003	chr2	-	24300303	24308731	18	7.5882	7.46191	9.79823	9.64614	8.51717	8.5746	9.53671	9.76096	8.34775	8.51327	9.81745	9.80631
GADD45A	ENST00000370986	16665932	2.603	0	0.021	2.147	0	0.011	2.711	0	0.006	chr1	+	68150744	68154021	23	8.4887	8.66046	10.0079	10.0196	8.71753	8.71645	9.77932	9.85776	8.28761	8.22966	9.66698	9.61009
GDF15	NM_004864	16859795	2.519	0	0.021	6.038	0	0.002	2.916	0	0.004	chr19	+	18496968	18499988	21	11.3876	11.2427	12.876	12.8425	9.44512	9.12953	11.8718	11.8903	11.2584	11.2902	12.6345	12.5806
ZNF563	NM_145276	16869106	2.449	0.001	0.217	1.293	0.101	0.569	1.264	0.057	0.402	chr19	-	12428291	12444534	8	3.50608	3.88355	3.94324	4.12314	5.05293	5.07279	5.74766	5.12014	5.47257	5.28501	6.97208	6.36918
ANKRA2	NM_023039	16997155	2.388	0	0.029	2.035	0	0.013	3.326	0	0.003	chr5	-	72848025	72861511	28	5.84613	5.78553	7.52569	7.5749	6.23458	6.35807	7.37827	7.2651	6.14823	5.9637	7.26231	7.36208
SESN2	NM_031459	16661544	2.367	0	0.023	2.914	0	0.004	2.922	0	0.006	chr1	+	28585963	28609002	22	8.86657	8.7692	10.2757	10.4547	8.46361	8.32619	9.92147	9.95368	9.51543	9.4485	10.7472	10.7024
C12orf5	NM_020375	16747004	2.347	0	0.024	2.107	0	0.016	2.263	0	0.006	chr12	+	4430359	4469194	16	8.59411	8.61484	9.79862	9.76647	8.62069	8.39496	9.57263	9.59329	9.32683	9.29894	10.6003	10.4876
PHLDA3	NM_012396	16697930	2.325	0	0.023	2.523	0	0.011	2.576	0	0.004	chr1	-	201434620	201438365	20	7.57726	7.58809	8.9535	8.94132	8.18124	7.95866	9.33916	9.47001	8.41208	8.4485	9.68225	9.61233
	---	17100771	2.32	0	0.028	2.57	0	0.013	2.728	0	0.01	chrUn	-	50939	59278	9	6.10715	6.32724	7.59813	7.73266	7.07279	6.75714	8.29531	8.25864	9.51499	9.5756	10.8243	10.6933
FDXR	NM_001258012	16848657	2.301	0	0.028	2.175	0	0.011	2.813	0	0.004	chr17	-	72858619	72869156	29	8.43025	8.43528	9.88171	9.96707	8.79955	8.80753	9.87277	9.97641	8.20819	8.06847	9.30321	9.37784
FAS	NM_000043	16707149	2.297	0	0.026	3.154	0	0.002	3.24	0	0.004	chr10	+	90729553	90775542	25	7.67131	7.67118	9.43768	9.29746	7.47994	7.457	9.10509	9.14566	8.36189	8.24889	9.49686	9.51474
CDKN1A	NM_001220778	17008007	2.286	0	0.067	3.492	0	0.002	3.43	0	0.016	chr6	+	36644237	36655116	24	7.80784	7.69512	9.74372	9.31525	7.68429	7.69768	9.45488	9.53423	7.85966	7.59382	9.00265	8.83634
CSH1	NM_001317	16847686	2.285	0.003	0.336	1.499	0.263	0.717	1.824	0.08	0.451	chr17	-	61972268	61974021	10	4.94129	6.29776	6.53923	6.4347	6.03108	5.31454	5.50578	7.00817	5.22341	4.69766	5.87737	6.42727
PIDD	NM_145886	16734119	2.207	0	0.023	2.01	0	0.021	1.421	0.004	0.168	chr11	-	799179	809753	26	8.03899	7.86974	8.56799	8.35462	7.84961	7.87799	8.7524	8.98832	8.3162	8.31871	9.46312	9.45663
DDIT4	NM_019058	16705961	2.186	0	0.039	2.39	0	0.009	2.819	0	0.004	chr10	+	74033677	74035797	25	9.3646	9.30958	10.8561	10.8089	8.23856	8.27207	9.44559	9.58002	7.17794	7.06483	8.1592	8.33924
POLH	NM_006502	17009054	2.178	0	0.028	2.218	0	0.009	2.455	0	0.007	chr6	+	43543878	43588260	26	9.87631	10.0112	11.2156	11.2644	10.159	10.0801	11.2606	11.2759	10.6067	10.53	11.6421	11.7406
OR51A4	ENST00000380373	16734818	2.17	0.023	0.462	1.018	0.898	0.973	0.926	0.697	0.901	chr11	-	4967355	4968356	10	3.86663	3.69534	3.23575	4.10378	3.63276	3.34542	3.80002	3.23023	3.5028	3.9853	5.39811	4.32688
ZNF79	NM_007135	17089315	2.141	0	0.037	1.913	0	0.012	2.235	0	0.01	chr9	+	130186653	130207651	18	7.95754	8.08651	9.22442	9.13908	8.33087	8.28187	9.2305	9.25487	9.10545	9.11519	10.2982	10.1189
	---	17103781	2.141	0.048	0.516	1.376	0.404	0.802	1.032	0.597	0.859	chrX	+	50722362	50727003	11	7.28955	7.42303	7.38505	7.41898	4.21965	4.87485	4.16719	5.84708	4.12807	5.5291	6.07986	5.77234
EFNB1	NM_004429	17104363	2.116	0	0.028	2.095	0	0.011	2.126	0	0.012	chrX	+	68048840	68062007	22	8.53135	8.63396	9.61469	9.72707	8.48795	8.41052	9.54698	9.48602	8.60928	8.65688	9.67257	9.75544
IKBIP	ENST00000342502	16768941	2.095	0	0.05	2.11	0	0.011	2.745	0	0.004	chr12	-	99007182	99038891	24	7.85697	7.90657	9.28712	9.39062	7.0055	7.02483	8.16032	8.02409	8.3527	8.16852	9.27163	9.38289
ZMAT3	ENST00000311417	16961773	2.065	0	0.028	2.488	0	0.005	2.461	0	0.007	chr3	-	178735011	178790067	29	8.36712	8.51903	9.71697	9.76718	9.20619	9.16061	10.4662	10.5314	10.0383	10.0067	11.0721	11.0655
XPC	ENST00000285021	16951007	2.061	0	0.028	1.779	0	0.026	1.992	0	0.01	chr3	-	14186647	14220283	23	7.6113	7.64808	8.61531	8.63259	8.06393	8.07552	8.8191	8.98216	7.56875	7.58081	8.62269	8.61333
KIAA0247	NM_014734	16785858	2.053	0	0.029	2.372	0	0.007	3.176	0	0.007	chr14	+	70078310	70181861	26	6.47485	6.70073	8.17446	8.33469	7.86062	7.80253	9.04464	9.11109	7.70551	7.7829	8.79698	8.76838
LACC1	NM_153218	16774427	2.046	0	0.038	0.864	0.076	0.528	2.906	0	0.016	chr13	+	44453420	44468068	29	6.68552	7.03017	8.46828	8.32531	5.15479	5.06684	4.79683	5.00302	6.74818	6.78841	7.87553	7.72649
LCE1F	NM_178354	16671065	2.042	0	0.088	1.122	0.082	0.539	1.362	0.002	0.137	chr1	+	152748848	152749445	17	3.89615	3.84027	4.24128	4.38807	3.67017	3.61526	3.77756	3.8395	4.0009	3.89343	5.10549	4.84935
FAM212B	NM_019099	16690890	2.025	0	0.134	1.699	0	0.023	1.852	0	0.058	chr1	-	112223252	112298446	22	6.04	6.08772	6.79378	7.1119	6.26772	6.30593	7.07382	7.02903	6.28799	6.04108	7.30339	7.0613
LIF	NM_002309	16933760	2.017	0	0.029	1.24	0.011	0.331	1.461	0.001	0.097	chr22	-	30636436	30642840	22	8.22494	8.27199	8.71101	8.88077	8.1914	8.11097	8.40076	8.52065	7.44388	7.4227	8.47837	8.41276
RNF19B	NM_153341	16684812	2	0	0.037	1.644	0	0.026	2.297	0	0.006	chr1	-	33402046	33430286	28	8.74328	8.78548	9.96289	9.96494	9.19853	9.22876	9.924	9.93655	9.2536	9.14443	10.1775	10.2201
MDM2	NM_002392	16753853	1.975	0	0.037	3.251	0	0.003	2.717	0	0.004	chr12	+	69201956	69239214	24	11.1068	11.0846	12.493	12.5828	10.6505	10.7274	12.3459	12.4336	11.5576	11.5242	12.468	12.5783
TNFRSF10B	NM_003842	17075426	1.971	0	0.03	1.947	0	0.012	2.341	0	0.009	chr8	-	22877646	22926700	24	9.06302	8.91338	10.2387	10.1913	9.03484	8.99288	9.98985	9.95989	8.60091	8.62901	9.61739	9.56953
TRIAP1	NM_016399	16771303	1.957	0	0.05	2.351	0	0.011	1.97	0	0.017	chr12	-	120881764	120884215	21	8.90591	9.0585	9.99724	9.92395	8.75041	8.87478	9.99471	10.0973	9.05171	8.89632	9.91638	9.96867
APOBEC3D	NM_152426	16930173	1.949	0	0.157	1.272	0.006	0.282	2.444	0	0.01	chr22	+	39417118	39429256	13	6.54837	6.34783	7.74234	7.73187	5.67251	5.78064	6.12021	6.02735	5.6642	5.98849	6.85161	6.7277
SLC30A1	ENST00000367001	16698980	1.945	0	0.037	1.671	0	0.023	2.055	0	0.012	chr1	-	211744910	211752099	22	8.72301	8.74311	9.71474	9.8302	9.04231	9.0294	9.77515	9.77758	9.42769	9.39328	10.4142	10.326
RRM2B	NM_001172477	17079808	1.944	0	0.037	2.201	0	0.015	2.126	0	0.009	chr8	-	103216729	103251346	27	9.20893	9.25202	10.2788	10.359	8.69319	8.81331	10.0019	9.78015	9.54763	9.51563	10.4444	10.5367
TLE4	NM_007005	17086208	1.861	0.004	0.364	0.846	0.055	0.489	0.958	0.65	0.882	chr9	+	82186688	82341658	27	4.27851	4.46642	4.46864	4.15214	5.04673	5.23428	4.97544	4.82065	5.55769	6.14226	6.77083	6.72122
DDB2	NM_000107	16724471	1.853	0	0.039	1.982	0	0.012	1.966	0	0.011	chr11	+	47236493	47260769	29	10.0694	10.124	11.0622	11.0806	10.4212	10.4702	11.3969	11.4677	10.0349	10.0339	10.8975	10.9519
	---	16713391	1.842	0.07	0.543	1.316	0.042	0.459	0.663	0.147	0.543	chr10	-	42383279	42391866	8	3.65932	4.18824	3.85346	2.80675	3.57743	3.58889	4.21726	3.74018	3.61811	2.98305	4.74547	3.61811
AMZ2P1	NR_026903	16847914	1.838	0.001	0.18	1.301	0.008	0.304	2.008	0	0.023	chr17	-	62962668	62971703	13	6.05803	6.1603	7.01802	7.2132	5.60399	5.5127	6.03972	5.83615	5.59418	5.91031	6.56778	6.69223
KRT16P3	NR_029393	16842417	1.835	0.027	0.47	1.247	0.071	0.521	0.838	0.15	0.548	chr17	-	20404826	20407811	12	4.1218	3.66189	3.6523	3.62129	4.27043	4.53808	4.89988	4.54541	3.4652	3.6129	4.88692	3.94406
KITLG	NM_000899	16768270	1.828	0	0.131	1.091	0.164	0.644	1.008	0.887	0.968	chr12	-	88885885	88974628	29	11.7591	11.8288	11.8036	11.8062	10.6426	10.6358	10.798	10.7297	6.97541	6.77897	7.83125	7.66326
CCNG2	NM_004354	16968077	1.824	0	0.039	1.063	0.316	0.752	1.552	0	0.042	chr4	+	78078304	78354542	31	5.98908	6.07302	6.66091	6.66847	7.64305	7.60249	7.74976	7.67168	6.46701	6.46863	7.3282	7.3419
	---	16876286	1.821	0.043	0.502	0.964	0.662	0.907	1.052	0.568	0.845	chrU	+	131379	145746	8	4.76049	4.5731	4.8734	4.60529	5.19955	5.07325	4.94431	5.22252	4.40204	3.67349	5.29857	4.50628
TMEM68	ENST00000334667	17077284	1.806	0	0.063	1.676	0	0.035	1.675	0	0.058	chr8	-	56608983	56685966	27	8.93727	8.97416	9.58457	9.81502	8.79281	8.7353	9.57566	9.4423	9.38515	9.28073	10.1548	10.2176
YPEL3	NM_031477	16825638	1.805	0	0.147	1.169	0.033	0.436	1.057	0.379	0.742	chr16	-	30103635	30107537	12	6.49431	6.62276	6.59892	6.67758	7.91037	7.93372	8.20103	8.09288	6.66962	6.84907	7.50803	7.71438
APOBEC3C	NM_014508	16930166	1.795	0	0.058	1.911	0	0.012	1.878	0	0.017	chr22	+	39410088	39414931	10	10.7759	10.6659	11.6207	11.6389	10.0185	9.9629	10.9345	10.9141	10.9996	10.9021	11.7891	11.8
GLS2	NM_013267	16766185	1.791	0	0.046	1.816	0	0.021	0.938	0.38	0.743	chr12	-	56864736	56882198	22	5.18183	5.13487	4.95407	5.17685	8.55195	8.61497	9.38387	9.50509	8.37808	8.3901	9.23893	9.21182
AGBL5-AS1	ENST00000444217	16895619	1.789	0	0.108	1.319	0.002	0.177	1.187	0.235	0.631	chr2	-	27272551	27273132	20	4.49238	3.9151	4.48318	4.4179	7.36394	7.40605	7.76443	7.80303	6.15234	6.31862	7.01726	7.13169
	---	16892745	1.783	0	0.131	1.047	0.552	0.868	1.072	0.357	0.727	chr2	+	235591337	235632116	19	4.31653	4.46763	4.58399	4.40011	4.3845	4.12841	4.31115	4.33465	4.58237	4.5836	5.29957	5.53512
	---	16835436	1.779	0	0.084	0.831	0.026	0.413	1.655	0	0.026	chr17	+	46782565	46784722	26	6.34865	6.40652	7.10183	7.10709	10.3284	10.1475	9.96796	9.97433	5.44532	5.34814	6.16539	6.29064
LOC400680	NR_037194	16860191	1.774	0.007	0.383	1.106	0.157	0.637	1.017	0.798	0.939	chr19	+	21666517	21686040	25	3.89702	3.81889	3.98067	3.78582	3.91353	3.97833	4.1715	4.01193	6.24893	5.98122	7.21478	6.66962
FAS-AS1	NR_028371	16716365	1.77	0.004	0.361	1.339	0.003	0.222	1.131	0.074	0.439	chr10	-	90751179	90752732	23	3.81317	3.91698	3.99968	4.08608	3.63445	3.68836	3.99602	4.16819	3.71927	4.24291	4.7909	4.8196
PPM1D	NM_003620	16836684	1.768	0	0.054	1.873	0	0.013	1.886	0	0.015	chr17	+	58677544	58743641	33	10.1809	10.1025	11.0381	11.0761	9.53842	9.49736	10.4164	10.4296	9.71611	9.65872	10.5163	10.5034
CBWD7	ENST00000360171	17094613	1.767	0.075	0.548	0.853	0.413	0.806	1.568	0.024	0.306	chr9	-	70432004	70497240	42	2.55662	2.89131	3.07638	3.66887	2.7534	3.19471	2.36046	3.12898	2.89377	2.42174	2.91095	4.0469
FAM84B	NM_174911	17081002	1.759	0	0.077	1.261	0.005	0.258	1.734	0	0.028	chr8	-	127564683	127570711	26	7.93264	8.04899	8.74776	8.82107	8.48643	8.41951	8.7748	8.80179	7.67663	7.64464	8.41309	8.53721
HIC1	NM_001098202	16829618	1.759	0.005	0.375	1.094	0.193	0.667	1.057	0.347	0.72	chr17	+	1958393	1962981	15	4.02814	3.93871	4.09389	4.03221	4.17908	4.33872	4.40205	4.37592	5.3989	5.10646	5.82658	6.30889
	---	16797834	1.748	0.053	0.522	0.84	0.386	0.793	0.771	0.229	0.626	chr15	+	23096869	23100207	8	4.90265	3.99119	4.09571	4.04718	3.58117	4.4958	3.8298	3.74375	4.24591	5.30342	5.49756	5.66449
	---	16942924	1.744	0	0.097	1.433	0.001	0.102	1.748	0	0.051	chr3	+	88108424	88188123	22	7.54947	7.78421	8.51862	8.42778	8.01808	8.03932	8.59361	8.50201	8.5977	8.52459	9.434	9.29142
EPS8L2	ENST00000318562	16720268	1.728	0	0.065	1.652	0.003	0.213	1.716	0.003	0.151	chr11	+	694438	727727	27	7.85051	7.62822	8.72594	8.31162	7.90303	7.84641	8.36052	8.83662	7.21783	7.15113	7.98647	7.95969
E2F7	NM_203394	16767851	1.717	0	0.063	1.582	0.001	0.112	1.711	0	0.028	chr12	-	77415026	77459360	33	9.64655	9.76647	10.4733	10.4906	8.98444	8.7588	9.46432	9.60233	10.067	10.0308	10.8322	10.8256
APAF1	NM_181861	16755542	1.709	0	0.108	1.02	0.75	0.935	2.278	0	0.006	chr12	+	99038919	99129211	33	7.41203	7.4177	8.6159	8.58933	7.41581	7.30875	7.35524	7.42583	8.06701	7.96642	8.7302	8.8496
	---	16973036	1.709	0.002	0.288	0.946	0.68	0.913	1.047	0.713	0.908	chr4	+	187051175	187051309	9	4.79656	4.78862	4.59613	5.12086	5.82324	5.24277	5.37504	5.53001	4.2166	3.96456	5.01785	4.70977
CES2	NR_036684	16819892	1.705	0	0.071	2.032	0	0.011	2.18	0	0.029	chr16	+	66968347	66978999	21	8.12052	8.42095	9.34212	9.44682	9.43136	9.40032	10.4104	10.468	8.48192	8.55257	9.28434	9.28984
ERVMER61-1	BC040856	16675227	1.703	0	0.108	0.986	0.86	0.964	0.927	0.189	0.589	chr1	+	187610358	187612992	10	4.51575	4.49813	4.36175	4.43166	4.5562	4.36687	4.53467	4.34893	4.58978	4.5112	5.25369	5.38281
DRAM1	NM_018370	16755908	1.692	0	0.084	2.032	0	0.012	2.207	0	0.007	chr12	+	102271105	102405908	29	8.9249	8.90577	10.0251	10.0888	9.13808	9.20023	10.2437	10.1397	9.04543	8.9478	9.75332	9.75782
ISCU	NM_014301	16756547	1.688	0	0.078	1.71	0	0.03	1.496	0	0.058	chr12	+	108956294	108963160	27	7.77501	7.71508	8.37068	8.28227	7.61677	7.66357	8.34439	8.48379	7.57446	7.53123	8.34039	8.27517
PRDM1	NM_001198	17011279	1.686	0.003	0.335	1.651	0	0.05	1.907	0	0.02	chr6	+	106534195	106557814	28	5.66676	5.68343	6.52439	6.688	8.36297	8.21868	8.9604	9.06633	5.55967	5.98527	6.49123	6.56129
	---	16988537	1.684	0.004	0.363	1.192	0.023	0.403	1.695	0.001	0.069	chr5	+	122131820	122131922	17	6.87114	7.12876	7.71045	7.81212	7.28288	7.31283	7.61323	7.48835	7.26533	6.91996	8.00472	7.68504
ABHD4	NM_022060	16782132	1.667	0	0.078	1.465	0.001	0.098	2.069	0	0.017	chr14	+	23067146	23081265	20	8.02007	7.98889	8.95536	9.15118	9.19335	9.1829	9.67815	9.80017	9.37403	9.4148	10.1436	10.1183
CSF1	ENST00000329608	16668420	1.667	0	0.145	1.684	0	0.048	1.348	0.002	0.121	chr1	+	110452864	110473616	26	6.88419	6.85651	7.25428	7.34795	7.58405	7.62206	8.26017	8.45058	8.04909	7.95554	8.65513	8.82367
	---	17099165	1.663	0.004	0.361	0.739	0.019	0.379	1	0.999	1	chr9	-	133896555	133896693	8	5.55341	4.82027	5.29886	5.07552	5.19312	4.81506	4.48993	4.64712	4.6087	4.96495	5.38258	5.65909
	---	16959091	1.659	0.049	0.518	1.47	0.037	0.444	1.09	0.534	0.828	chr3	-	129808276	129813147	11	6.68423	6.10482	6.47392	6.56316	4.7714	5.09633	5.18169	5.79756	5.34186	6.04854	6.11694	6.73251
HLA-C	ENST00000461285	17041782	1.657	0.011	0.408	1.525	0.094	0.557	1.024	0.829	0.95	chr6_ssto_hap7	-	2570005	2573397	32	8.04088	7.68365	8.03968	7.75381	7.87495	7.09018	7.7355	8.44676	7.12301	6.64609	7.79733	7.42916
TNFRSF10D	NM_003840	17075448	1.656	0	0.106	2.038	0	0.011	1.676	0	0.023	chr8	-	22993101	23021543	15	10.1828	10.162	10.9273	10.9073	9.4046	9.36398	10.4305	10.3927	10.5791	10.6126	11.3785	11.2701
NHLH2	ENST00000369506	16691350	1.655	0.001	0.217	0.957	0.539	0.863	1.109	0.187	0.587	chr1	-	116378998	116386538	27	4.00727	3.94609	4.23999	4.01151	4.01346	4.22504	4.05947	4.05274	4.30942	4.17913	4.84342	5.09948
	---	16912227	1.655	0.005	0.375	0.931	0.302	0.743	0.974	0.706	0.905	chr20	+	25844905	25848315	11	5.61483	5.71085	5.5247	5.72447	6.03874	6.13044	6.05759	5.90555	5.97044	6.06416	6.50508	6.98362
SERPINE1	NM_000602	17049676	1.651	0	0.137	0.976	0.725	0.928	3.189	0	0.005	chr7	+	100770370	100782547	22	7.37959	7.47107	9.01056	9.18658	5.12927	4.94217	5.03375	4.96786	8.58583	8.42791	9.19685	9.26341
ZNF654	NM_018293	16942935	1.645	0.001	0.219	1.397	0.008	0.3	1.905	0	0.035	chr3	+	88188254	88193815	18	7.32847	7.57206	8.34668	8.41296	8.13961	7.79601	8.42158	8.47886	8.32457	8.10468	8.84433	9.02124
ORAI3	ENST00000318663	16818083	1.643	0.001	0.178	1.23	0.009	0.314	1.945	0	0.036	chr16	+	30960387	30966259	20	7.12377	7.05545	7.91629	8.18319	8.57593	8.61884	8.93585	8.85638	7.3861	7.25792	7.94377	8.13263
GALR2	ENST00000329003	16838017	1.64	0	0.134	1.06	0.448	0.822	1.409	0.003	0.149	chr17	+	74070875	74073622	16	6.52216	6.70679	7.04301	7.17625	6.71473	6.49019	6.63518	6.73762	8.08145	7.92532	8.73191	8.70232
SYNC	ENST00000409190	16684744	1.639	0.004	0.367	0.967	0.632	0.897	1.309	0.003	0.151	chr1	-	33145507	33169197	19	5.64577	5.72062	6.11422	6.03084	6.07773	5.88129	5.94944	5.91379	6.10407	6.46018	6.8552	7.13427
LCAT	ENST00000264005	16827494	1.638	0	0.131	1.754	0.002	0.182	1.59	0.001	0.088	chr16	-	67973653	67978414	18	7.5657	7.63167	8.38919	8.14671	8.00553	8.07932	8.603	9.10462	8.96137	9.06522	9.67209	9.77882
FBXO22	NM_147188	16803269	1.63	0	0.088	1.524	0	0.05	1.522	0	0.046	chr15	+	76196200	76227609	31	9.49676	9.50907	10.0719	10.1467	9.60106	9.62014	10.2344	10.2037	9.53799	9.57084	10.2711	10.2472
MAP3K12	NM_001193511	16765325	1.629	0.001	0.248	1.065	0.412	0.805	1.74	0	0.028	chr12	-	53874274	53893847	22	7.53693	7.49349	8.37964	8.24955	6.45832	6.46853	6.43054	6.67924	7.27525	7.02899	7.94102	7.77127
TSKU	NM_001258210	16729290	1.623	0	0.112	1.083	0.19	0.665	1.386	0.001	0.09	chr11	+	76493295	76509198	22	7.58192	7.52496	8.04145	8.00693	8.93964	8.91834	9.01756	9.07137	7.52931	7.44056	8.15362	8.21456
S100A10	ENST00000368811	16693272	1.623	0.095	0.577	1.098	0.165	0.644	0.968	0.697	0.901	chr1	-	151955386	151966866	22	7.70538	7.39766	7.49873	7.50982	8.11785	8.18577	8.34779	8.22669	3.85392	4.34608	5.31134	4.28693
FAM153A	ENST00000360669	17003407	1.62	0.027	0.469	0.806	0.252	0.71	1.095	0.39	0.748	chr5	-	177134982	177210399	17	5.14447	5.1685	5.49387	5.0816	4.91507	5.45965	5.19031	4.56167	4.52993	5.14902	5.33572	5.73548
ZNF222	NM_013360	16862895	1.619	0.003	0.319	0.975	0.783	0.944	1.326	0.228	0.624	chr19	+	44529494	44537263	13	3.82639	3.76192	3.70686	4.69524	3.63818	3.30606	3.5122	3.3581	4.16893	4.50682	4.95821	5.10738
BLOC1S2	NR_046315	16717522	1.616	0	0.097	1.873	0	0.014	1.956	0	0.015	chr10	-	102033713	102046439	18	9.57083	9.57382	10.4803	10.6004	9.35813	9.43038	10.3228	10.2755	9.51746	9.56052	10.2431	10.2188
GXYLT1	NM_173601	16763246	1.612	0	0.112	1.343	0.002	0.174	1.408	0.004	0.167	chr12	-	42475647	42538681	22	8.58094	8.82377	9.15135	9.24138	8.33227	8.43788	8.82362	8.79736	9.26961	9.22292	9.97565	9.89404
PRKAB2	NM_005399	16692297	1.611	0	0.146	1.502	0	0.092	1.504	0	0.046	chr1	-	146626685	146644129	24	9.15228	9.17399	9.77083	9.73255	9.5696	9.66658	10.2634	10.1461	9.82509	9.67382	10.4127	10.4614
CCZ1	NM_015622	17043328	1.607	0.043	0.504	0.808	0.277	0.727	1.256	0.217	0.615	chr7	+	5938341	5965605	12	4.59317	5.05827	5.45847	4.85113	5.62704	6.12554	5.21082	5.92803	4.34992	5.18654	5.41117	5.49232
GOLGA6A	NM_001038640	16803144	1.593	0.039	0.498	1.366	0.02	0.387	0.734	0.019	0.286	chr15	+	75550899	75565796	41	3.13395	3.49285	2.95726	2.77527	2.54386	2.70737	2.87207	3.27983	3.65525	2.98305	3.77731	4.20499
	---	16737944	1.589	0.005	0.368	1.174	0.055	0.489	1.205	0.039	0.353	chr11	-	47241769	47243302	21	4.39052	4.26185	4.49297	4.6969	4.33352	4.21701	4.41466	4.59965	4.03966	4.33239	4.7052	5.00218
RPL23AP53	NR_003572	17074015	1.583	0	0.139	1.697	0.001	0.115	1.784	0	0.035	chr8	-	158344	182318	10	7.34231	7.39826	8.10718	8.30242	7.13709	6.80645	7.68281	7.78741	7.3516	7.40707	7.98644	8.09805
CPEB2	NM_182485	16965162	1.583	0.004	0.367	1.039	0.627	0.895	1.017	0.879	0.966	chr4	+	15004298	15071777	21	4.72548	5.1685	4.95646	4.98482	7.79141	7.61179	7.66029	7.85192	6.09952	5.83805	6.78562	6.47715
PLK3	ENST00000372201	16664005	1.58	0	0.157	2.32	0	0.021	2.711	0	0.004	chr1	+	45265897	45271667	33	8.24103	8.30461	9.70357	9.72067	6.99794	6.69663	7.98184	8.14069	8.20638	8.26256	8.9647	8.82438
	---	16891502	1.578	0.005	0.369	1.214	0.04	0.454	1.181	0.043	0.365	chr2	+	220970377	221569286	23	5.94192	6.13045	6.31198	6.24052	7.03278	6.9252	7.13494	7.38286	4.47455	4.16433	5.11453	4.84111
PNRC1	NM_006813	17010929	1.575	0.001	0.183	1.13	0.068	0.514	1.587	0	0.043	chr6	+	89790429	89794879	23	9.31953	9.21769	9.96913	9.90051	10.2149	10.1522	10.3379	10.381	9.15622	9.34742	9.9028	9.91025
PRKAB1	ENST00000229328	16757806	1.574	0	0.112	1.711	0	0.03	1.765	0	0.017	chr12	+	120105558	120119435	26	8.49013	8.44899	9.27255	9.30678	8.17517	8.27141	8.94523	9.05071	8.47194	8.45688	9.10105	9.13604
ZNF114	NM_153608	16863740	1.574	0	0.161	1.055	0.517	0.854	0.875	0.037	0.35	chr19	+	48774654	48790863	19	8.74333	8.75435	8.57003	8.54271	7.04261	7.16999	7.31296	7.05353	9.6124	9.76075	10.3657	10.3159
CSNK1G1	NM_022048	16810523	1.574	0	0.164	1.683	0	0.026	1.49	0.001	0.087	chr15	-	64457716	64665964	21	8.78941	8.67385	9.24183	9.37219	8.71358	8.71043	9.50224	9.42394	8.62783	8.52881	9.16718	9.29695
FRK	NM_002031	17022916	1.571	0.011	0.408	0.926	0.301	0.742	1.449	0.005	0.186	chr6	-	116262693	116381921	29	6.32881	6.17757	6.64171	6.93387	5.24799	5.08673	4.98464	5.12904	3.44619	3.86476	4.14474	4.47052
PMAIP1	ENST00000316660	16852683	1.567	0	0.123	1.627	0	0.049	1.634	0	0.031	chr18	+	57567180	57571538	25	9.80339	9.88849	10.5677	10.5395	7.75678	7.90291	8.55834	8.50451	8.88361	8.91308	9.57618	9.51605
CROT	NM_001143935	17047918	1.566	0	0.161	1.169	0.026	0.413	1.001	0.982	0.995	chr7	+	86974951	87029112	33	3.50121	3.61212	3.55101	3.56606	8.34978	8.37533	8.60401	8.57079	6.51821	6.4386	7.19178	7.05904
	---	16993390	1.565	0	0.161	1.735	0.001	0.127	1.674	0	0.028	chr5	+	179084763	179095672	13	7.53966	7.51017	8.31619	8.22005	8.02539	7.95562	8.59091	8.98047	8.04228	8.15579	8.79567	8.69512
KIR3DL2	NM_006737	16865530	1.562	0.063	0.536	1.375	0.047	0.474	0.918	0.633	0.874	chr19	+	55361898	55378670	8	4.63993	4.37909	4.00871	4.76184	4.50657	3.90712	4.63236	4.69897	3.88874	4.78339	5.00096	4.95701
TARP	BC030554	17056845	1.555	0.017	0.44	1.126	0.135	0.611	0.88	0.39	0.748	chr7	-	38393316	38394118	11	5.09174	4.64965	4.90946	4.46097	4.39285	4.16719	4.46097	4.44193	3.74018	3.7878	4.68778	4.11342
RPS27L	ENST00000330964	16810329	1.554	0	0.118	1.874	0	0.015	2.184	0	0.012	chr15	-	63418071	63450220	30	6.77728	6.60996	7.81328	7.82719	6.94958	6.95998	7.91785	7.80444	7.28078	7.28415	7.92704	7.90984
	---	16997132	1.554	0.023	0.464	0.962	0.546	0.866	1.417	0.001	0.089	chr5	-	72236631	72251181	21	3.48364	3.4508	3.91848	4.02281	3.15394	3.11943	3.15295	3.00881	3.75622	3.78675	4.08818	4.72629
	---	17094331	1.549	0.001	0.203	1.778	0	0.021	1.545	0.003	0.156	chr9	-	44890666	44991061	15	8.2304	7.87405	8.71859	8.64186	8.37205	8.47707	9.24701	9.26174	9.00455	9.07247	9.57795	9.76119
ZFYVE1	NM_021260	16794441	1.546	0	0.123	1.259	0.006	0.271	1.433	0.001	0.076	chr14	-	73435669	73493920	36	6.93535	6.9191	7.40334	7.48937	8.03239	8.00068	8.30494	8.39221	8.06094	8.04478	8.6795	8.68405
PLXNB3	NM_005393	17108113	1.543	0.002	0.308	1.981	0	0.019	1.742	0	0.027	chrX	+	153029651	153045940	28	5.53084	5.61838	6.42445	6.3263	6.11479	6.05758	7.17044	6.9743	5.3326	5.33023	5.80461	6.11054
LOC648809	NR_036652	16804141	1.543	0.026	0.469	0.992	0.911	0.978	0.972	0.799	0.94	chr15	+	84748939	84795353	8	5.79994	5.39346	5.66057	5.45162	5.7294	5.94468	5.77636	5.87413	4.97608	5.06548	5.96745	5.32576
CMBL	NM_138809	16994340	1.538	0	0.147	1.551	0	0.055	1.811	0	0.016	chr5	-	10275987	10308168	32	8.59655	8.61009	9.48429	9.43591	8.98011	8.99351	9.56717	9.67187	8.59628	8.54924	9.14944	9.2375
ZNF702P	NR_003578	16875140	1.536	0.001	0.244	0.973	0.742	0.932	0.891	0.49	0.806	chr19	-	53471504	53496784	12	4.37983	4.99753	4.33449	4.71027	4.51636	4.38669	4.55375	4.26878	7.99331	7.76902	8.52131	8.47974
	---	16837052	1.536	0.006	0.383	0.844	0.052	0.48	0.984	0.826	0.949	chr17	+	61977916	61979254	11	3.84037	4.05611	3.9721	3.87862	4.36536	4.55761	4.2884	4.14419	4.08067	4.32342	4.98828	4.65391
RHOD	NM_014578	16727650	1.534	0	0.137	1.471	0	0.072	1.473	0.001	0.097	chr11	+	66824289	66839488	24	10.2101	10.0694	10.7597	10.6374	10.6525	10.6167	11.1703	11.2131	10.295	10.2401	10.8692	10.8996
ZNF219	NM_001101672	16790202	1.534	0.001	0.18	1.577	0	0.08	1.579	0	0.065	chr14	-	21558205	21572881	33	6.45889	6.3244	7.12243	6.9786	7.24619	7.05001	7.79399	7.81626	6.92219	7.07029	7.63569	7.59019
BCRP2	NR_037566	16927535	1.534	0.009	0.403	0.857	0.044	0.465	0.782	0.01	0.237	chr22	+	21457305	21476575	13	5.8465	5.64625	5.4232	5.35997	6.05476	6.04388	5.75013	5.90433	6.32458	5.92825	6.62344	6.86378
DNAJB5	ENST00000541010	17084565	1.525	0	0.141	1.026	0.654	0.904	1.098	0.135	0.53	chr9	+	34989638	34998897	27	7.04447	6.95262	7.16178	7.10551	7.17254	7.13534	7.16328	7.21911	7.181	7.1294	7.74899	7.77887
	---	17019481	1.521	0.001	0.226	1.352	0.061	0.502	1.242	0.27	0.662	chr6	-	43555967	43559099	21	4.21248	3.87399	3.97582	4.73718	4.09064	3.74913	4.09683	4.61289	4.26211	4.16026	4.72936	4.90395
SPANXD	NM_032417	17114723	1.521	0.032	0.483	1.143	0.063	0.507	0.921	0.173	0.572	chrX	-	140785568	140786896	9	4.54721	4.58744	4.48983	4.40893	4.5819	4.57884	4.83989	4.70658	4.68875	4.02132	4.95754	4.96225
	---	17012340	1.519	0.003	0.336	0.803	0.105	0.576	1.129	0.419	0.767	chr6	+	126196314	126196644	10	4.63306	5.26313	5.16194	5.08372	5.09329	5.29597	5.1216	4.63452	4.99665	5.12985	5.52341	5.8091
ASTN2	ENST00000373996	17097735	1.518	0.002	0.308	1.523	0	0.056	1.637	0.001	0.115	chr9	-	119187504	120177348	36	5.82485	6.05146	6.52343	6.77505	6.07733	6.14573	6.72893	6.70816	6.25181	6.20151	6.68842	6.96892
	---	16957285	1.514	0.002	0.313	0.997	0.978	0.996	1.491	0.002	0.12	chr3	-	110607231	110612323	27	6.01726	6.10359	6.52068	6.75243	5.11023	5.20673	5.35537	4.9534	6.20696	6.19177	6.65494	6.9401
SNRPN	AF400494	16798294	1.514	0.003	0.335	0.825	0.04	0.455	1.03	0.755	0.923	chr15	+	25434370	25442649	12	6.09702	5.79341	6.08874	5.88626	6.14057	6.02844	5.68688	5.92774	5.35256	5.37861	5.80906	6.11767
RGL1	NM_015149	16674927	1.513	0.002	0.28	1.174	0.027	0.414	1.246	0.019	0.284	chr1	+	183605208	183897666	18	6.98742	7.2136	7.43389	7.40197	6.79373	6.74686	7.0368	6.9671	7.33169	7.18668	7.75505	7.9583
	---	16950330	1.509	0.001	0.217	1.456	0.001	0.137	1.116	0.128	0.521	chr3	-	5198590	5229014	27	3.41416	3.51197	3.69733	3.54476	5.42517	5.6235	6.06743	6.06549	3.87701	3.80116	4.35115	4.51544
	---	16923543	1.507	0.016	0.433	0.948	0.524	0.858	0.835	0.03	0.328	chr21	+	45595372	45596336	11	3.9578	4.14245	3.76795	3.81192	3.91137	4.16125	4.04396	3.874	3.88195	3.36286	4.20549	4.22243
CLYBL	AK095506	16776100	1.504	0	0.161	1.188	0.071	0.521	1.032	0.652	0.883	chr13	+	100557626	100560611	13	5.9815	6.19068	6.10912	6.15332	6.22699	6.02784	6.2627	6.48747	5.60995	5.59806	6.14963	6.23727
ACSL5	NM_016234	16709268	1.504	0.003	0.322	0.862	0.1	0.568	0.904	0.088	0.466	chr10	+	114133776	114188138	22	10.6339	10.6384	10.4979	10.4829	10.1556	10.2999	10.1367	9.88985	3.71915	3.76432	4.18964	4.47172
BAX	ENST00000293288	16863922	1.503	0.001	0.178	2.178	0	0.011	1.784	0	0.024	chr19	+	49458072	49465055	24	8.57455	8.59425	9.48773	9.35133	8.78188	8.7515	9.82433	9.95412	9.37033	9.40131	10.0308	9.91676
PGAP1	NM_024989	16906835	1.499	0	0.147	1.342	0.001	0.157	1.925	0	0.017	chr2	-	197697728	197792520	28	7.34064	7.45413	8.38277	8.30189	9.05331	9.04646	9.44976	9.49869	8.67285	8.7029	9.27612	9.26737
PRKY	NR_028062	17116050	1.499	0.007	0.392	1.361	0.03	0.424	1.078	0.647	0.881	chrY	+	7142013	7249588	9	5.70618	5.74891	5.47844	6.19171	5.63423	5.61575	6.31684	5.82296	5.50698	5.6	5.94355	6.33142
MC3R	NM_019888	16915006	1.497	0.001	0.172	1.147	0.123	0.596	0.956	0.523	0.823	chr20	+	54823788	54824871	15	4.0469	3.85325	3.83953	3.93137	4.06667	3.78637	4.15224	4.09753	3.80553	3.88055	4.46097	4.38992
LOC100506293	ENST00000440689	16668598	1.497	0.047	0.515	0.981	0.758	0.936	1.142	0.358	0.727	chr1	+	111486089	111495470	15	5.15689	4.63616	5.2367	4.93849	4.66876	4.56729	4.62393	4.558	3.56636	3.46409	4.45543	3.73858
CT47B1	NM_001145718	17113779	1.495	0.033	0.485	1.237	0.015	0.358	0.952	0.661	0.886	chrX	-	120006451	120009779	8	5.52081	5.94296	5.57412	5.74864	5.87737	5.88622	6.27905	6.09853	5.72503	5.80378	6.02712	6.66141
FAM111A	ENST00000528737	16725049	1.491	0.001	0.18	0.871	0.048	0.475	0.936	0.296	0.683	chr11	+	58910221	58922512	22	8.30823	8.202	8.21252	8.10523	8.13212	8.20064	7.93059	8.00154	6.89931	6.93517	7.54526	7.44185
	---	16729100	1.49	0.004	0.367	0.953	0.422	0.81	1.053	0.35	0.722	chr11	+	74975333	74976214	19	4.50347	4.47777	4.53327	4.59796	4.70539	4.75193	4.61569	4.70152	4.41712	4.30141	4.77884	5.08993
PLXNB2	NM_012401	16936452	1.489	0	0.161	1.279	0.006	0.267	1.331	0.002	0.12	chr22	-	50713408	50746056	32	10.2274	10.1738	10.6061	10.6219	10.6027	10.4812	10.8665	10.927	9.84747	9.78514	10.4012	10.3804
BCRP3	NR_024494	16928329	1.489	0.165	0.646	1.017	0.886	0.971	0.792	0.38	0.742	chr22	+	25028882	25049327	8	4.44389	3.53517	3.28265	4.02281	3.7823	3.32897	3.48162	3.67698	3.9853	3.58068	3.80503	4.90946
OR4N5	NM_001004724	16781466	1.487	0.013	0.414	1.088	0.245	0.706	1.045	0.423	0.769	chr14	+	20611895	20612821	13	2.95954	2.90454	3.02141	2.97067	2.92593	3.09293	3.07621	3.18736	3.06106	3.07875	3.40974	3.87352
PRG2	Z26248	16738477	1.487	0.085	0.565	1.494	0.002	0.174	0.892	0.098	0.48	chr11	-	57166969	57167039	11	6.34081	6.1924	6.08513	6.11738	6.21529	5.97078	6.59411	6.75083	4.78858	4.18367	5.37602	4.73997
ZNF561	NM_152289	16868418	1.486	0	0.157	1.363	0.002	0.182	1.374	0.001	0.111	chr19	-	9715356	9732075	21	7.27393	7.16383	7.67998	7.67443	7.08435	6.92947	7.48499	7.42312	7.32068	7.34566	7.89411	7.91354
ALG1L2	NM_001136152	16945456	1.486	0.124	0.609	0.965	0.693	0.917	1.266	0.13	0.523	chr3	+	129800674	129817233	8	3.13011	3.35229	3.30022	3.86229	3.48871	3.71458	3.68383	3.41595	3.28182	3.16078	4.30008	3.28386
RAP2B	NM_002886	16947113	1.485	0.002	0.272	1.372	0.001	0.14	1.49	0.001	0.097	chr3	+	152880029	152886265	18	9.70296	9.64875	10.1546	10.3474	8.98293	8.9247	9.3746	9.44445	8.70191	8.91201	9.36689	9.38636
ERVV-2	NM_001191055	16864907	1.485	0.002	0.28	0.93	0.281	0.73	0.94	0.277	0.667	chr19	+	53547991	53554380	25	4.07677	4.15647	4.01969	4.03378	4.26274	4.11955	4.11887	4.05458	4.48659	4.63987	5.05112	5.21624
TRPM6	NM_017662	17094946	1.483	0	0.159	1.242	0.009	0.313	1.41	0.012	0.249	chr9	-	77337411	77503010	38	5.77155	5.3791	6.09899	6.04406	6.89473	6.83402	7.12216	7.2335	5.59002	5.55249	6.14508	6.13602
ZNF157	NM_003446	17103141	1.483	0.011	0.408	1.077	0.405	0.802	1.196	0.017	0.275	chrX	+	47229982	47273704	11	4.28099	4.17401	4.48799	4.48344	4.39408	4.06877	4.35662	4.32041	4.15015	3.71235	4.47961	4.5203
	---	16875968	1.483	0.041	0.5	1.245	0.013	0.346	1.309	0.045	0.372	chr19	-	58024375	58024441	9	4.30042	4.39313	4.95696	4.51177	4.8532	5.00948	5.20157	5.29325	3.88403	4.47228	4.90789	4.58555
LRP1	NM_002332	16752715	1.482	0	0.161	1.545	0.004	0.239	1.837	0	0.021	chr12	+	57522276	57607142	87	6.19625	6.32053	7.09988	7.17136	8.88017	8.46686	9.25265	9.34958	7.89541	7.85024	8.45051	8.43181
	---	17020532	1.481	0.006	0.383	1.741	0	0.026	1.35	0.022	0.298	chr6	-	64282387	64286786	24	7.97901	7.58958	8.16267	8.27203	7.28314	7.25343	8.13485	8.00158	7.44852	7.44952	7.83409	8.19843
PPP1R15A	NM_014330	16863877	1.48	0.001	0.207	1.017	0.758	0.936	1.36	0.002	0.146	chr19	+	49375649	49379319	21	8.3359	8.43294	8.75961	8.89703	8.29826	8.25655	8.28542	8.31988	9.34893	9.22318	9.82403	9.88027
PHF7	NM_016483	16941493	1.479	0.001	0.197	1.181	0.03	0.424	0.981	0.837	0.953	chr3	+	52443510	52457657	32	6.37949	6.7012	6.44935	6.57761	7.10526	7.11631	7.28277	7.41964	6.48362	6.59972	7.0934	7.12088
SCARNA3	NR_002998	16696685	1.478	0.001	0.197	1.157	0.192	0.666	0.991	0.94	0.983	chr1	-	175937533	175937676	23	4.39477	4.78252	4.43192	4.72009	4.9829	4.74998	4.89539	5.25729	4.63098	4.7477	5.26172	5.24461
DDIT3	NM_001195056	16766578	1.477	0.006	0.383	1.734	0	0.024	1.887	0	0.03	chr12	-	57910371	57914300	19	5.31654	5.52724	6.37879	6.29616	5.5056	5.51776	6.24723	6.36395	5.90246	5.64171	6.45641	6.21399
POTEC	NM_001137671	16854117	1.477	0.021	0.457	1.291	0.072	0.522	0.85	0.081	0.453	chr18	-	14507338	14543599	8	5.34142	5.11518	4.90691	5.08255	5.22687	4.68829	5.29952	5.35254	4.74425	5.15624	5.68301	5.34419
LOC284385	NM_001242812	16858007	1.476	0.001	0.261	1.625	0	0.06	2.685	0	0.006	chr19	+	9732158	9745538	16	6.35305	6.29292	7.6783	7.81835	7.04565	6.92664	7.76315	7.60972	7.31442	7.14962	7.74342	7.84367
HCAR3	NM_006018	16771801	1.474	0.005	0.372	0.851	0.047	0.474	0.896	0.321	0.702	chr12	-	123199303	123201439	14	5.09174	5.30911	4.85578	5.228	5.38262	5.55898	5.27807	5.20045	4.89992	4.95273	5.32306	5.64934
WASH6P	ENST00000461007	17108617	1.474	0.009	0.402	0.906	0.477	0.835	0.885	0.326	0.705	chrX	+	155227246	155255375	9	5.05285	5.03384	4.61851	5.11666	5.52231	5.02744	4.94881	5.31414	4.48231	4.87325	5.19011	5.28566
PRKD2	NM_016457	16873581	1.473	0.001	0.17	1.874	0	0.016	1.368	0.001	0.116	chr19	-	47177573	47220384	39	9.0829	9.0915	9.59493	9.48295	8.94381	8.87571	9.76207	9.86897	9.42853	9.42148	10.0139	9.95393
BTBD10	NM_032320	16735952	1.471	0.001	0.172	1.147	0.069	0.515	1.557	0.001	0.083	chr11	-	13409548	13484844	24	7.36535	7.55646	8.04951	8.15028	7.92032	7.94699	8.04881	8.21479	7.89673	7.83666	8.42901	8.41751
CAPN3	NM_000070	16800061	1.47	0.004	0.361	1.294	0.01	0.317	1.476	0.025	0.311	chr15	+	42651698	42704515	14	5.58922	6.16755	6.4837	6.39786	5.78186	5.89777	6.10971	6.31451	5.99374	5.95384	6.67744	6.38138
RN5S444	ENST00000516844	16837126	1.468	0.289	0.736	1.249	0.354	0.774	0.999	0.994	0.998	chr17	+	64263861	64263966	8	4.22493	4.8103	4.36319	4.66856	4.31904	3.34248	3.89512	4.40839	3.60231	4.54521	4.00509	5.25027
CERS5	NM_147190	16764535	1.467	0.003	0.324	1.286	0.004	0.245	1.434	0.001	0.084	chr12	-	50523575	50561288	22	7.14303	7.184	7.63297	7.73327	7.42252	7.52431	7.81109	7.86101	7.70355	7.59184	8.08539	8.31519
LCE1B	NM_178349	16671077	1.467	0.004	0.356	1.2	0.05	0.478	1.183	0.018	0.279	chr1	+	152784447	152785585	15	3.12724	3.06246	3.35103	3.3256	2.99049	3.13856	3.44098	3.21359	3.17412	3.15314	3.86032	3.57208
C20orf72	ENST00000377710	16911675	1.466	0.001	0.197	1.343	0.001	0.159	1.082	0.163	0.562	chr20	+	17949556	17972204	25	9.83821	9.84131	9.963	9.9442	9.08054	9.02537	9.48893	9.46603	9.49286	9.42165	9.97262	10.0459
PARD6G	NM_032510	16856159	1.465	0.001	0.272	1.006	0.947	0.988	2.017	0	0.015	chr18	-	77915115	78005429	21	7.92091	8.0288	8.94418	9.02944	4.60234	4.44702	4.68947	4.37704	7.46985	7.47022	8.11707	7.92515
MIR4540	NR_039766	17093990	1.464	0.027	0.47	1.032	0.855	0.963	0.953	0.73	0.914	chr9	-	36864251	36864305	8	4.36348	3.90346	4.25632	3.87219	3.8565	4.65963	4.29738	4.30961	4.04361	3.48309	4.27734	4.34983
LCE1E	ENST00000368771	16671068	1.463	0.016	0.438	1.147	0.073	0.523	1.052	0.584	0.852	chr1	+	152758690	152760902	16	4.54185	4.65767	4.83692	4.5079	4.81875	4.64088	4.94184	4.91426	4.11819	4.52678	4.74799	4.99563
ASCC3	ENST00000369162	17022035	1.462	0.001	0.172	1.722	0	0.021	1.659	0	0.028	chr6	-	100956070	101329248	51	9.47245	9.49113	10.1755	10.2482	9.50064	9.46825	10.2606	10.2766	9.59074	9.59936	10.1217	10.1647
DOCK8	NM_203447	17082982	1.462	0.001	0.199	0.99	0.867	0.966	0.977	0.65	0.882	chr9	+	214854	465259	51	4.36806	4.37394	4.32345	4.35034	4.80714	4.73397	4.77586	4.73725	5.6054	5.59578	6.20129	6.09638
ZNF767	NR_027788	17064197	1.461	0.001	0.18	1.649	0.001	0.123	1.466	0.001	0.107	chr7	-	149244245	149321881	23	7.47993	7.61056	8.17388	8.02115	8.47049	8.64981	9.14136	9.42243	8.32804	8.31465	8.83436	8.90158
	---	16924108	1.46	0.013	0.414	1.387	0.005	0.248	1.202	0.042	0.364	chr21	-	10196442	10200844	17	5.55617	5.48587	5.9048	5.66793	5.3506	5.13937	5.80743	5.62707	6.22735	5.78992	6.56577	6.54328
KANK3	NM_198471	16868145	1.456	0.002	0.28	1.591	0	0.077	1.548	0.001	0.089	chr19	-	8387468	8408146	25	7.2247	7.20495	7.95906	7.73112	6.92666	6.9909	7.53269	7.7242	6.61588	6.81293	7.24765	7.26495
KRT72	NM_080747	16764989	1.454	0.016	0.435	1.377	0.003	0.222	0.934	0.379	0.742	chr12	-	52979373	52995322	8	4.9876	5.12676	4.84971	5.06654	5.04035	4.8145	5.41551	5.36296	4.87138	4.44912	5.29775	5.10226
MIR331	NR_029895	16755265	1.451	0.093	0.575	0.826	0.318	0.753	0.933	0.393	0.75	chr12	+	95702196	95702289	11	5.18442	5.14409	5.20173	4.92627	5.73883	4.92271	4.92271	5.18803	4.6915	5.52724	5.56924	5.72401
SMTN	ENST00000404496	16929064	1.45	0.001	0.225	1.268	0.005	0.252	1.216	0.028	0.324	chr22	+	31460091	31500743	52	7.07171	6.96315	7.3974	7.20191	6.94886	6.98748	7.2732	7.34793	6.83947	6.80262	7.29364	7.42125
CYFIP2	NM_001037332	16991527	1.449	0.001	0.178	1.636	0	0.026	2.207	0	0.009	chr5	+	156693089	156822606	34	8.17677	8.18376	9.26346	9.38107	8.93666	8.909	9.6407	9.62576	8.96086	8.94031	9.4792	9.49121
NTPCR	ENST00000366628	16678838	1.449	0.001	0.203	1.643	0	0.029	1.699	0	0.046	chr1	+	233086351	233114548	29	7.7639	7.9684	8.6341	8.629	7.83237	7.87576	8.53937	8.60047	8.08665	8.06078	8.56244	8.65424
ITPKC	NM_025194	16862324	1.449	0.001	0.241	1.095	0.212	0.683	1.683	0	0.046	chr19	+	41223008	41246765	17	6.85149	7.03303	7.65744	7.72894	7.78608	7.85991	8.04344	7.86431	7.773	7.72873	8.35514	8.21753
FUCA1	NM_000147	16683445	1.448	0.003	0.335	1.042	0.472	0.834	1.457	0	0.058	chr1	-	24171567	24194859	21	9.04321	9.09082	9.60534	9.61457	10.3496	10.3494	10.392	10.4256	9.38982	9.2698	9.7544	9.97381
	---	16735865	1.447	0.032	0.481	1.01	0.909	0.977	1.05	0.491	0.807	chr11	-	11173944	11177996	9	5.72754	5.50416	5.67927	5.69511	5.35632	5.57619	5.36012	5.60079	5.15369	5.55944	5.68728	6.0928
FLJ32255	AK056817	16995866	1.445	0.001	0.241	1.297	0.009	0.311	1.793	0	0.041	chr5	-	42985140	42993437	15	5.24062	5.36398	6.04673	6.24263	6.89396	7.04515	7.43079	7.25784	6.31186	6.23159	6.85956	6.74598
	---	16847199	1.445	0.002	0.285	1.065	0.331	0.762	0.995	0.952	0.988	chr17	-	56709003	56709197	15	5.95136	5.66421	5.76634	5.83522	6.5351	6.67375	6.6958	6.6947	5.51027	5.41051	6.07712	5.90592
	---	17099825	1.444	0.005	0.376	1.456	0.002	0.172	2.23	0	0.032	chr9	-	138999331	138999842	21	5.80086	5.62556	7.02124	6.71838	6.37052	6.15811	6.74112	6.87142	5.22084	5.43723	5.7455	5.97258
NUAK1	NM_014840	16769569	1.444	0.006	0.378	1.334	0.002	0.173	1.1	0.138	0.533	chr12	-	106457118	106533811	22	7.5315	7.4791	7.58691	7.6981	7.31799	7.28757	7.68035	7.75818	7.62311	7.33564	8.07279	7.9451
RN5S155	ENST00000411154	16974315	1.444	0.027	0.469	1.17	0.064	0.509	1.207	0.051	0.387	chr4	-	10117380	10117508	15	2.85665	3.12139	3.31443	3.20675	2.74582	2.955	3.02591	3.12898	3.38767	3.18862	4.06693	3.56882
	---	16794997	1.442	0.001	0.201	0.888	0.104	0.575	1.274	0.065	0.42	chr14	-	76620530	76673228	19	5.68024	5.40485	5.70763	6.07537	5.43985	5.28395	5.15637	5.22379	5.72338	5.69037	6.27031	6.19924
ALPI	NM_001631	16892260	1.442	0.004	0.364	1.162	0.05	0.478	0.92	0.295	0.682	chr2	+	233320833	233324742	12	5.17835	5.37046	5.24155	5.06589	5.37981	5.22256	5.49689	5.53815	5.22783	4.95303	5.60013	5.63716
	---	16915086	1.441	0.002	0.289	1.068	0.543	0.865	1.022	0.855	0.958	chr20	+	55171366	55173677	17	4.96793	4.65473	5.04464	4.64189	4.82694	4.897	5.17881	4.73548	4.67113	4.47737	5.12733	5.07559
NADSYN1	ENST00000319023	16728442	1.44	0.001	0.198	1.62	0	0.031	1.757	0	0.017	chr11	+	71164155	71239227	40	6.83097	6.82572	7.63306	7.6502	7.32608	7.29091	7.97116	8.03851	7.37641	7.44318	7.93748	7.93427
EGFL8	ENST00000480383	17041169	1.44	0.066	0.539	1.357	0.001	0.143	1.075	0.469	0.795	chr6_ssto_hap7	+	3468402	3487483	39	7.62898	7.37508	7.75381	7.45947	7.5542	7.59539	8.03711	7.99155	6.73778	6.05659	6.79231	7.05412
BBS4	NR_045566	16802771	1.439	0.001	0.209	1.291	0.004	0.237	1.228	0.01	0.232	chr15	+	72978520	73030817	32	8.42488	8.47074	8.69577	8.79145	8.76115	8.84057	9.21148	9.12774	8.45509	8.37056	8.91976	8.95616
TRAF4	NM_004295	16832588	1.439	0.001	0.209	1.82	0	0.021	1.887	0	0.016	chr17	+	27071023	27077976	29	7.89598	7.96674	8.88899	8.80583	7.44123	7.41272	8.22216	8.35928	7.93103	8.01661	8.51754	8.48103
LOC100507316	ENST00000517411	17082032	1.439	0.002	0.275	1.598	0.019	0.379	1.157	0.11	0.495	chr8	-	144362331	144363898	20	8.75987	8.66133	9.05664	8.7848	7.42015	8.05931	8.26152	8.56949	8.68721	8.82445	9.33245	9.22932
TAF3	ENST00000344293	16702330	1.438	0.001	0.226	1.412	0.001	0.098	1.637	0	0.036	chr10	+	7860467	8058590	25	8.73581	8.85466	9.48896	9.52407	8.4768	8.45857	8.97049	8.96163	9.52884	9.42546	9.97114	10.0321
LOC100128253	AK056228	16760070	1.438	0.009	0.403	1.526	0.004	0.227	1.127	0.267	0.659	chr12	-	3405217	3409390	17	4.48261	4.4368	4.42903	4.8353	6.86337	6.96	7.3304	7.71253	4.30037	3.94103	4.69306	4.59543
KSR2	NM_173598	16770888	1.436	0.006	0.378	1.019	0.9	0.974	1.014	0.897	0.971	chr12	-	117890817	118406788	23	6.64878	6.95859	6.67683	6.96954	7.832	7.28899	7.38602	7.78866	5.34803	5.09957	5.83695	5.6543
MFAP3	ENST00000519325	16991370	1.435	0.002	0.28	0.741	0.015	0.36	1.2	0.213	0.612	chr5	+	153599618	153600038	18	5.43466	5.67112	5.54713	6.0839	5.61351	5.58983	5.3561	4.98409	5.93301	5.96936	6.3883	6.55681
	---	16755921	1.434	0.001	0.209	1.118	0.109	0.581	1.174	0.11	0.496	chr12	+	102349395	102356105	15	4.76427	4.54728	4.75784	5.01568	4.92237	4.8589	4.99	5.11344	4.90694	4.87049	5.44717	5.37042
ADCK3	ENST00000366779	16678191	1.434	0.001	0.214	1.227	0.01	0.318	1.533	0.001	0.112	chr1	+	227085237	227175246	24	7.08127	6.83117	7.53129	7.61324	7.79872	7.73176	8.08828	8.03204	7.43246	7.34886	7.93042	7.88998
GK-IT1	ENST00000441146	17102387	1.434	0.032	0.481	1.016	0.822	0.954	1.061	0.328	0.706	chrX	+	30689752	30690283	17	6.01832	6.03108	6.04937	6.16971	6.17077	6.03931	6.04646	6.20918	5.90204	6.05812	6.23322	6.76677
FHL2	NM_201555	16901393	1.433	0.001	0.2	1.709	0	0.03	1.567	0	0.039	chr2	-	105974169	106055230	27	7.54083	7.55383	8.15771	8.23297	7.91993	7.93026	8.6286	8.76792	7.67619	7.6541	8.21057	8.15686
LINC00515	AF086441	16924521	1.433	0.012	0.411	1.1	0.499	0.846	1.567	0.003	0.151	chr21	-	26955087	26955536	21	5.37715	5.10447	5.76672	6.01073	5.30641	4.68778	5.16222	5.10654	5.44867	5.40213	5.74447	6.14419
CCDC90B	ENST00000529689	16742852	1.431	0.001	0.197	1.564	0	0.097	1.808	0	0.028	chr11	-	82970139	82997450	22	7.76146	7.9321	8.67717	8.72455	7.89391	7.7326	8.53022	8.3853	8.21472	8.21055	8.70932	8.74996
	---	16902250	1.431	0.005	0.374	0.83	0.023	0.4	1.33	0.028	0.322	chr2	-	120932461	120974120	20	9.07966	9.02473	9.26047	9.6666	7.7361	7.57499	7.38044	7.39507	6.18937	6.46931	6.80072	6.89227
ACTR3BP5	NR_045000	16704096	1.431	0.05	0.519	1.084	0.188	0.664	1.003	0.975	0.994	chr10	+	39006326	39012607	11	6.29922	6.0398	6.28632	6.06078	6.27393	6.27911	6.358	6.42957	5.59418	6.0588	6.56764	6.1192
TRAJ39	ENST00000390498	16782046	1.43	0.002	0.313	0.81	0.156	0.635	1.025	0.743	0.919	chr14	+	22970585	22970647	8	4.78641	4.85206	4.73316	4.97602	4.77583	5.06702	4.88586	4.34876	4.54207	4.75084	5.15226	5.17318
	---	17009961	1.43	0.003	0.35	1.196	0.022	0.395	1.035	0.524	0.823	chr6	+	64516729	64532535	17	3.95117	3.9406	3.95997	4.03235	3.91085	3.7821	4.09826	4.11159	4.22709	4.15395	4.58817	4.82395
HSD17B7	NM_016371	16673104	1.43	0.004	0.359	1.63	0.002	0.18	1.42	0.001	0.088	chr1	+	162760492	162782608	12	5.81817	5.89578	6.39915	6.32715	6.14731	6.04241	6.59947	6.9994	5.50128	5.54107	5.91097	6.16405
TRIM35	NM_171982	17075698	1.428	0.001	0.225	1.164	0.088	0.548	1.497	0	0.055	chr8	-	27142404	27168836	21	7.84927	7.91722	8.49744	8.43312	7.96652	8.02104	8.34483	8.08003	8.80674	8.72588	9.31245	9.24894
	---	16750586	1.427	0.001	0.217	1.065	0.388	0.794	1.159	0.218	0.616	chr12	+	48744728	48836194	18	3.64865	3.19842	3.69039	3.58325	3.45286	3.54534	3.49265	3.68736	3.29216	3.36215	3.86781	3.81346
	---	16753225	1.427	0.002	0.288	1.053	0.431	0.814	1.04	0.535	0.828	chr12	+	58287870	58290670	23	4.57518	4.53416	4.69325	4.53031	4.35273	4.43504	4.39994	4.53804	4.41905	4.50913	4.89678	5.05655
	---	16896010	1.425	0.033	0.485	1.048	0.567	0.875	1.134	0.059	0.407	chr2	-	28646221	28646862	21	3.55331	3.65379	3.79953	3.77032	3.86223	3.63335	3.73194	3.89714	3.38171	3.71815	3.84328	4.27832
STAU2-AS1	NR_038406	17070031	1.425	0.033	0.486	1.188	0.059	0.497	1.07	0.222	0.62	chr8	+	74332239	74353761	21	4.14336	4.14095	4.23549	4.24307	3.84098	4.07359	4.13795	4.27554	4.26106	4.04965	4.41118	4.92089
FAM46C	NM_017709	16669278	1.424	0.002	0.272	0.941	0.363	0.78	1.066	0.408	0.76	chr1	+	118148556	118171011	15	6.46615	6.24947	6.38278	6.51747	6.40932	6.42913	6.40932	6.25613	6.07335	6.1532	6.55942	6.68703
HSD3B2	NM_001166120	16669364	1.424	0.054	0.524	1.036	0.697	0.919	0.961	0.449	0.784	chr1	+	119957554	119965662	9	4.73757	4.72629	4.65524	4.69203	4.83626	5.16438	4.98623	5.11696	3.83294	4.45876	4.56123	4.75132
TP53TG1	AK292782	17059444	1.422	0.001	0.244	1.67	0	0.04	1.071	0.261	0.655	chr7	-	86953598	86974837	22	5.03614	4.91995	5.0897	5.06388	7.34423	7.18116	8.00679	7.99844	5.96446	6.07919	6.52802	6.53123
OR5F1	NM_003697	16738361	1.421	0.008	0.401	0.931	0.252	0.71	0.944	0.376	0.74	chr11	-	55761157	55762101	15	3.68784	3.76462	3.71708	3.56996	3.717	3.67776	3.63913	3.54957	3.61811	3.51721	4.23769	3.91219
RHD	NM_016124	16660891	1.42	0.002	0.285	1.131	0.071	0.52	1.079	0.215	0.614	chr1	+	25598981	25656936	12	3.1935	3.30846	3.37022	3.35143	3.4598	3.47021	3.59341	3.69198	3.27937	3.27601	3.87008	3.698
	---	16920232	1.417	0.001	0.246	1.214	0.014	0.355	1.1	0.264	0.657	chr20	-	48779907	48782702	21	4.67081	4.3813	4.67157	4.65599	3.98916	4.10393	4.32943	4.32329	4.34495	4.43723	4.92578	4.86148
	---	16664215	1.417	0.001	0.261	1.099	0.144	0.623	1.097	0.194	0.594	chr1	+	46599043	46604753	16	3.35581	3.18095	3.36181	3.44205	3.65017	3.57542	3.71801	3.77909	3.50734	3.41128	4.00828	3.91722
C18orf56	ENST00000323813	16853414	1.417	0.002	0.288	1.47	0.001	0.131	1.102	0.097	0.479	chr18	-	649620	658340	20	7.07865	7.08529	7.22472	7.22011	7.49434	7.63491	8.04948	8.19239	7.31734	7.2236	7.70004	7.84696
	---	16849337	1.417	0.01	0.404	0.963	0.576	0.878	0.885	0.056	0.4	chr17	-	75148643	75148756	10	4.69579	4.75885	4.53331	4.56833	4.79972	4.95765	4.7864	4.8632	4.81373	5.1665	5.53164	5.45454
	---	17114824	1.416	0.002	0.28	1.151	0.094	0.557	1.14	0.184	0.583	chrX	-	147579633	147582135	19	5.01902	5.01593	5.38023	5.03222	5.34966	5.58813	5.64847	5.69523	4.95325	4.81411	5.4125	5.35857
RXRB	ENST00000436753	17029917	1.416	0.006	0.378	1.257	0.097	0.563	1.104	0.494	0.809	chr6_cox_hap2	-	4605201	4612464	45	7.17162	6.95618	7.49523	6.91818	7.25746	7.33454	7.3615	7.89064	7.15599	7.34643	7.64536	7.86042
	---	16758128	1.416	0.046	0.508	1.094	0.344	0.77	1.1	0.236	0.633	chr12	+	122042807	122042917	10	3.78443	3.58376	3.74252	3.89955	3.747	3.52846	3.62429	3.91196	3.30848	3.90188	4.16206	4.05189
CYP4F11	NM_021187	16869960	1.415	0.004	0.363	1.166	0.074	0.526	1.903	0	0.057	chr19	-	16023180	16045676	14	7.30995	7.5263	8.21727	8.47475	3.9547	4.1365	4.35189	4.18376	4.13691	4.38386	4.7482	4.77458
	---	17042874	1.415	0.005	0.37	1.021	0.719	0.925	1.103	0.138	0.533	chr7	+	1199662	1204903	21	6.93096	6.98246	7.16145	7.03369	7.06715	7.1227	7.15496	7.09534	6.03151	6.20678	6.72319	6.51811
	---	16757633	1.415	0.005	0.375	0.997	0.969	0.994	0.871	0.074	0.44	chr12	+	117147983	117150681	19	4.40904	4.55895	4.34813	4.21965	4.65858	4.6351	4.55275	4.73335	4.38968	4.45029	4.78288	5.05914
	---	16688466	1.414	0.015	0.431	1.106	0.214	0.684	0.83	0.118	0.507	chr1	-	71181616	71185972	15	6.37323	6.02758	5.80043	6.0617	6.18115	6.37541	6.34012	6.50856	6.11928	5.99828	6.36088	6.75666
	---	16819758	1.412	0.001	0.251	0.956	0.437	0.817	0.85	0.028	0.322	chr16	+	61163021	61185962	20	4.20629	4.12295	3.88326	3.97728	4.15913	4.18407	4.07962	4.13317	4.00007	3.92781	4.41791	4.50684
ZNF440	ENST00000304060	16858538	1.412	0.002	0.303	1.466	0.001	0.123	1.866	0	0.024	chr19	+	11925099	11946016	12	8.41179	8.4026	9.22114	9.39275	8.5963	8.43563	9.11607	9.02038	8.65504	8.7955	9.16352	9.28254
	---	16787151	1.412	0.024	0.464	1.235	0.01	0.317	0.94	0.333	0.709	chr14	+	86378385	86596675	20	3.29095	3.29516	3.12732	3.28084	3.66673	3.75748	4.04644	3.985	3.37108	3.32769	3.61069	4.08508
TNFRSF10A	ENST00000221132	17075460	1.411	0.001	0.209	1.382	0.001	0.136	1.655	0	0.029	chr8	-	23047965	23082680	20	8.25804	8.24769	8.93312	9.02709	7.92846	7.96835	8.45885	8.37254	8.01941	8.03144	8.53497	8.50912
DDX11L2	NR_024004	16902048	1.411	0.002	0.285	1.237	0.074	0.525	0.925	0.266	0.659	chr2	-	114356605	114361294	11	6.12141	6.17707	6.12937	5.94509	5.59251	5.19851	5.78745	5.61809	5.21565	5.05585	5.63541	5.62998
	---	16772017	1.411	0.017	0.441	0.951	0.519	0.855	1.034	0.687	0.898	chr12	-	124060445	124062838	12	6.03206	6.05821	6.24362	5.94318	6.00342	5.73821	5.81384	5.78093	5.31561	5.66993	6.10435	5.8747
MRC1	NM_002438	16702836	1.41	0.123	0.609	0.543	0.037	0.444	0.713	0.018	0.279	chr10	+	17851246	17953186	33	4.19839	3.8942	3.39742	3.71703	3.46701	4.47623	2.81172	3.36977	4.41803	4.41	5.34966	4.47052
SERTAD1	ENST00000357949	16872443	1.409	0.005	0.375	1.252	0.009	0.312	1.908	0	0.016	chr19	-	40927499	40931932	23	8.58365	8.58715	9.57061	9.4632	9.30385	9.22969	9.65409	9.52764	8.62332	8.42542	8.92305	9.11582
ANXA4	NM_001153	16881069	1.407	0.001	0.214	0.971	0.633	0.897	1.538	0	0.048	chr2	+	69871557	70053928	19	9.46236	9.56507	10.1215	10.1469	11.3519	11.2219	11.2138	11.2731	9.07261	9.0358	9.54965	9.54455
LOC390660	NR_045529	16803901	1.407	0.009	0.402	1.094	0.343	0.769	0.953	0.396	0.752	chr15	+	82585621	82626915	9	5.73602	5.8203	5.70439	5.71419	5.68471	5.78164	6.03034	5.69304	5.81543	5.48273	6.14005	6.14366
	---	16998004	1.406	0.01	0.404	0.86	0.078	0.533	1.117	0.067	0.423	chr5	-	89648854	89652426	14	4.20765	4.20495	4.3672	4.36527	4.14701	4.38605	4.01427	4.08218	4.14293	4.37844	4.62571	4.88019
	---	16882188	1.406	0.019	0.453	0.983	0.827	0.956	0.869	0.124	0.516	chr2	+	85514761	85519567	15	4.66185	4.74755	4.64344	4.36191	4.31062	4.02586	4.14928	4.13654	3.98798	4.33503	4.52256	4.78381
KLLN	NM_001126049	16716320	1.405	0.001	0.272	2.224	0	0.011	1.948	0	0.016	chr10	-	89618918	89623194	22	6.57216	6.69534	7.61338	7.5788	7.44084	7.3865	8.49192	8.64062	6.78939	6.66539	7.21923	7.21675
	---	16914261	1.403	0.012	0.409	1.11	0.255	0.713	0.913	0.295	0.682	chr20	+	44080765	44085455	10	4.67916	4.87731	4.76156	4.53111	4.58116	4.67554	4.93348	4.6225	4.32629	4.67834	4.94717	5.03584
CFLAR	NM_003879	16889411	1.402	0.001	0.248	1.203	0.018	0.379	1.568	0	0.042	chr2	+	201980827	202037411	39	7.00301	7.09437	7.72199	7.67296	7.19212	7.25095	7.43272	7.54499	6.81435	6.85396	7.36509	7.27805
MRRFP1	ENST00000435941	17113860	1.402	0.002	0.28	1.035	0.672	0.911	0.866	0.305	0.689	chrX	-	122249960	122251634	11	5.10022	5.54765	5.29804	4.93307	4.93272	4.9133	4.83151	5.11253	4.71748	4.81182	5.30108	5.20264
CCDC160	ENST00000517294	17107023	1.402	0.004	0.362	0.991	0.869	0.966	1.111	0.115	0.503	chrX	+	133371077	133380237	21	4.22144	4.29159	4.46874	4.34877	4.08027	4.08269	4.06703	4.06944	4.0542	3.98523	4.61792	4.3956
IGHV1-12	ENST00000518307	16818446	1.401	0.009	0.403	1.191	0.061	0.503	1.025	0.661	0.886	chr16	+	32070405	32077703	11	6.7751	6.75592	6.85527	6.74768	6.82147	6.90702	7.25158	6.98133	6.83575	7.11144	7.36831	7.55182
	---	16795791	1.401	0.016	0.433	1.2	0.042	0.46	0.849	0.029	0.328	chr14	-	91288709	91294472	18	6.08232	5.94627	5.79488	5.76016	4.88007	4.9049	5.03388	5.27762	4.53638	4.90976	5.13375	5.28406
	---	16812920	1.4	0.001	0.225	1.075	0.477	0.835	1.01	0.906	0.974	chr15	-	86716429	86716501	9	2.94897	2.74	2.961	2.75571	2.62619	2.7422	2.59169	2.98738	2.80158	2.83317	3.2853	3.31861
TMEM131	NM_015348	16900802	1.4	0.001	0.248	1.249	0.007	0.286	1.309	0.002	0.142	chr2	-	98372799	98612388	40	10.3435	10.3825	10.7153	10.788	10.5258	10.4373	10.8167	10.7887	10.0286	9.94971	10.451	10.4967
SNAI3	NM_178310	16829153	1.399	0.002	0.303	1.175	0.072	0.521	0.992	0.926	0.979	chr16	-	88744090	88752882	19	6.91228	6.87801	7.04442	6.72262	7.03062	6.90681	7.08265	7.32131	6.70607	6.87339	7.26138	7.28701
ARHGAP42	NM_152432	16730429	1.398	0.001	0.255	0.94	0.306	0.746	1.227	0.015	0.266	chr11	+	100558384	100861656	23	8.98909	9.00168	9.20728	9.37329	9.71101	9.65698	9.56711	9.62305	8.4674	8.43283	8.8871	8.97888
DUSP14	ENST00000394386	16833567	1.397	0.003	0.335	1.438	0.002	0.182	1.834	0	0.017	chr17	+	35849937	35873603	17	9.59115	9.67985	10.4969	10.5233	9.21922	9.14683	9.5856	9.82934	10.7682	10.571	11.1446	11.1583
	---	16772937	1.397	0.08	0.554	0.679	0.006	0.271	0.743	0.003	0.154	chr13	+	20449327	20449425	9	4.95785	4.86939	4.41086	4.5601	5.18561	5.01756	4.36053	4.72422	4.70636	4.62347	5.49886	4.79418
TPD52L3	ENST00000344545	17083444	1.396	0.009	0.403	1.055	0.488	0.84	1.098	0.169	0.569	chr9	+	6328349	6331900	18	3.53345	3.3718	3.59218	3.58229	3.58668	3.65983	3.58027	3.82002	3.55273	3.38609	4.09082	3.81077
MTHFR	ENST00000376585	16681775	1.396	0.011	0.406	0.901	0.159	0.639	1.157	0.032	0.334	chr1	-	11845780	11866977	27	6.25853	6.19903	6.41467	6.46324	6.67493	6.54716	6.53248	6.38994	5.51079	5.83225	6.20932	6.09476
	---	16744317	1.395	0.003	0.33	1.093	0.6	0.887	1.572	0	0.064	chr11	-	111639392	111649074	17	5.14194	4.9893	5.66474	5.77313	5.42113	5.50705	5.20589	5.97849	5.35481	5.3371	5.91969	5.73304
PGBD2	ENST00000539153	16679851	1.394	0.003	0.34	1.037	0.535	0.862	1.306	0.008	0.219	chr1	+	249200395	249214145	27	6.98313	7.16751	7.52399	7.39607	7.01848	6.9354	7.01068	7.04966	6.66778	6.47905	7.01891	7.08658
	---	16962181	1.394	0.004	0.366	1.108	0.355	0.775	0.953	0.723	0.912	chr3	-	183812906	183822966	15	4.74054	4.56509	4.85751	4.31092	4.75908	4.45793	4.92254	4.58988	4.29524	4.45307	4.76911	4.93764
PGPEP1	NM_017712	16859788	1.394	0.004	0.367	1.389	0.001	0.115	1.692	0	0.026	chr19	+	18451408	18480763	26	8.33927	8.42137	9.12027	9.15803	8.7285	8.69699	9.17197	9.20154	9.59424	9.37423	9.92513	10.0017
RN5S43	ENST00000516559	16685357	1.393	0.006	0.383	0.968	0.68	0.913	1.202	0.186	0.585	chr1	-	37730278	37730387	11	3.85346	3.32242	3.78813	3.91876	3.86196	3.58889	3.64971	3.70621	3.89648	3.86763	4.49422	4.2256
PPP1R1C	NM_001080545	16888349	1.393	0.007	0.383	1.149	0.114	0.588	1.12	0.312	0.695	chr2	+	182818968	182996125	22	6.95935	7.38478	7.38528	7.28553	5.64703	5.85543	5.86115	6.04203	4.69013	4.91171	5.18937	5.36828
GK3P	NR_026575	16981168	1.393	0.057	0.529	0.957	0.553	0.869	1.04	0.617	0.868	chr4	-	166198944	166201175	10	4.35451	4.40922	4.57357	4.30406	4.45803	4.28613	4.39189	4.22404	3.91736	4.40344	4.82978	4.44686
PML	NM_033240	16802918	1.392	0.002	0.288	1.218	0.01	0.319	1.591	0	0.042	chr15	+	74287014	74340160	30	7.35636	7.47801	8.07381	8.10029	7.82207	7.81737	8.0785	8.12873	7.09701	6.95853	7.49283	7.51651
GRIN2C	NM_000835	16848640	1.392	0.004	0.363	2.192	0	0.013	1.367	0.016	0.27	chr17	-	72838162	72856966	22	6.26363	6.59116	6.97763	6.78	6.55338	6.60789	7.60429	7.82117	5.94019	6.08409	6.40303	6.57486
	---	17016522	1.391	0.003	0.335	0.929	0.221	0.689	1.202	0.012	0.249	chr6	-	28046570	28048908	18	6.50245	6.44309	6.72488	6.75328	6.60271	6.56097	6.4532	6.4967	6.33495	6.40992	6.93397	6.76305
	---	16659684	1.391	0.02	0.457	0.891	0.25	0.709	0.722	0.014	0.261	chr1	+	15868660	15868799	13	4.86039	4.65443	4.12213	4.45329	4.86777	4.68778	4.77772	4.44442	4.48174	4.64964	4.84799	5.23452
CYBRD1	ENST00000321348	16887589	1.391	0.022	0.46	1.106	0.285	0.732	0.824	0.013	0.253	chr2	+	172378757	172414643	26	9.00562	8.96104	8.65086	8.75612	4.69193	5.0247	5.05224	4.95499	4.71149	4.60364	4.9214	5.34491
	---	16841788	1.389	0.006	0.383	1.103	0.305	0.745	0.913	0.185	0.585	chr17	-	16438939	16439449	21	6.53319	6.37776	6.35981	6.28945	6.35208	6.42106	6.70119	6.35339	6.2152	6.30844	6.6078	6.86286
RETSAT	NM_017750	16899634	1.388	0.002	0.28	1.335	0.001	0.158	1.574	0	0.035	chr2	-	85569072	85581821	27	9.7867	9.84516	10.4728	10.4667	10.718	10.7015	11.129	11.1244	9.90309	9.80611	10.3609	10.2938
GRHL2	NM_024915	17071497	1.388	0.109	0.593	1.001	0.986	0.998	1.13	0.076	0.442	chr8	+	102504660	102681954	40	8.58244	8.56144	8.681	8.81564	8.97755	8.86527	8.89068	8.95534	4.97069	4.26376	4.91454	5.26552
AEN	ENST00000332810	16804478	1.387	0.001	0.244	1.904	0	0.015	1.486	0	0.065	chr15	+	89164527	89175513	26	8.17999	8.18682	8.81464	8.69332	7.45538	7.4508	8.31656	8.44799	8.79354	8.74327	9.23001	9.25059
PRKX-AS1	ENST00000414074	17101287	1.387	0.006	0.383	0.973	0.641	0.9	0.969	0.788	0.936	chrX	+	3577528	3586233	25	4.62272	4.35497	4.24534	4.64313	4.53115	4.46475	4.46843	4.44978	4.77548	4.51249	5.12551	5.10551
MIR3935	NR_037499	16819176	1.387	0.012	0.409	1.032	0.706	0.922	0.995	0.94	0.983	chr16	+	56279432	56279535	16	7.61059	7.49241	7.61308	7.47586	7.70494	7.44603	7.55113	7.68912	7.35532	7.69697	7.97965	8.01626
FAM215A	NR_026770	16834687	1.387	0.021	0.46	1.197	0.029	0.423	0.947	0.334	0.71	chr17	+	41994576	41995355	10	8.18605	8.13456	8.04755	8.11471	8.25708	8.14369	8.53126	8.38915	8.07749	8.46158	8.64624	8.83757
HSPA4L	NM_014278	16970536	1.385	0.001	0.247	1.551	0	0.044	1.581	0	0.031	chr4	+	128702976	128755226	20	10.3937	10.3761	11.043	11.049	11.1143	11.061	11.7207	11.7212	11.4286	11.4182	11.9209	11.8658
	---	16660266	1.385	0.002	0.318	1.157	0.162	0.64	1.03	0.719	0.91	chr1	+	20140860	20145995	18	3.98785	4.24079	4.23119	4.08222	4.101	4.10383	4.504	4.12119	4.00803	3.97923	4.54366	4.38351
	---	16748157	1.385	0.038	0.497	0.903	0.18	0.658	0.849	0.026	0.314	chr12	+	9518908	9520002	12	3.70215	3.79673	3.47719	3.54894	3.73338	3.59732	3.43771	3.59941	3.65686	3.87417	3.99704	4.47498
ZNF337	NM_015655	16918137	1.384	0.003	0.335	1.776	0	0.026	1.608	0	0.037	chr20	-	25654851	25677477	20	7.07991	7.18857	7.81624	7.82234	7.07391	7.20387	7.91556	8.02044	7.15139	7.0797	7.66586	7.50324
MIR4289	NR_036252	17095564	1.384	0.092	0.574	1.142	0.321	0.755	0.662	0.001	0.088	chr9	-	91360751	91360820	9	5.67688	5.49773	5.03157	4.95045	5.247	5.7563	5.81897	5.56734	5.37013	4.83942	5.82324	5.32333
	---	16707215	1.383	0.002	0.288	0.929	0.491	0.842	1.236	0.026	0.315	chr10	+	91405039	91410424	28	4.54596	4.57845	4.74388	4.992	4.3656	4.56666	4.55419	4.16557	4.3965	4.52086	4.90627	4.9476
RNF185-AS1	BC069286	16934039	1.382	0.08	0.554	1.04	0.785	0.944	1.233	0.006	0.199	chr22	-	31601250	31601602	24	5.24889	5.22426	5.53311	5.54428	5.79655	5.29446	5.80312	5.40035	5.77144	5.29706	5.7541	6.24764
TRIM3	NM_006458	16735075	1.381	0.002	0.275	1.301	0.003	0.202	1.117	0.074	0.44	chr11	-	6469843	6495689	17	6.46982	6.4154	6.60966	6.59334	6.97096	6.93843	7.30035	7.36969	7.06722	6.97311	7.47284	7.50023
TRIM64C	ENST00000329862	16743193	1.381	0.024	0.464	0.944	0.462	0.83	1.093	0.297	0.683	chr11	-	89602450	89609185	8	3.68853	3.47977	3.61017	3.81463	3.57265	3.80174	3.54381	3.66473	3.71208	3.72585	3.96521	4.40475
	---	16944892	1.38	0.015	0.429	1.028	0.812	0.952	0.713	0.04	0.357	chr3	+	124126538	124126630	8	7.11778	7.48458	6.59186	7.03518	7.14391	7.6074	7.52224	7.30976	6.4977	6.21415	6.93723	6.70472
HERC2P3	NR_036432	16805832	1.379	0.185	0.66	1.15	0.129	0.604	0.945	0.541	0.832	chr15	-	20613649	20711433	26	4.70745	4.80606	4.8447	4.50468	4.55512	4.75995	4.74526	4.97346	4.044	5.03733	5.0115	4.99737
LOC284440	NR_026956	16870739	1.378	0.007	0.383	1.356	0.027	0.417	1.486	0.002	0.139	chr19	-	19867180	19887222	23	5.16747	5.44827	5.88963	5.86906	5.97041	5.78213	6.09965	6.53067	5.74596	5.84412	6.38159	6.13539
HSPA1L	NM_005527	17017485	1.378	0.063	0.536	1.202	0.158	0.637	0.947	0.673	0.892	chr6	-	31777396	31783437	28	5.12133	5.46903	5.42927	5.00344	5.1235	5.28794	5.71824	5.22425	5.19686	5.42397	6.0625	5.48529
FAM214A	NM_019600	16809511	1.377	0.001	0.248	1.268	0.004	0.237	1.614	0.002	0.131	chr15	-	52873518	52970820	24	5.82539	6.01029	6.4552	6.76289	7.46917	7.43762	7.80067	7.79103	7.79503	7.75715	8.23674	8.23968
	---	16982835	1.377	0.019	0.453	1.025	0.732	0.929	1.036	0.652	0.883	chr5	+	3609099	3612053	23	4.20057	4.20801	4.11791	4.39353	4.51991	4.4592	4.41582	4.63494	4.04179	4.21419	4.77144	4.4095
ACOT1	NM_001037161	16786248	1.377	0.034	0.487	0.968	0.653	0.904	0.973	0.611	0.865	chr14	+	74003818	74010498	9	3.78983	3.79526	3.78505	3.72121	3.98255	3.75933	3.7935	3.85346	4.64173	4.15426	4.84112	4.87858
	---	16888444	1.376	0.021	0.46	0.92	0.418	0.809	1.221	0.01	0.233	chr2	+	186031529	186085119	17	3.25128	3.30067	3.60107	3.52678	3.35341	3.75917	3.39386	3.47655	3.30845	3.32436	3.56954	3.98483
	---	16832403	1.376	0.058	0.53	0.943	0.652	0.904	0.994	0.92	0.977	chr17	+	26345796	26345933	12	4.95133	4.88167	4.86199	4.95456	4.59151	4.85556	4.89268	4.38512	4.96394	4.65803	5.52685	5.01558
	---	17127643	1.376	0.162	0.644	0.725	0.005	0.262	1.012	0.872	0.964	---	---	---	---	11	6.46816	6.24648	6.4386	6.31095	6.00512	5.73048	5.37287	5.4359	6.15941	5.46366	5.96813	6.57762
CSNK2B	ENST00000439572	17006763	1.375	0.002	0.28	1.168	0.179	0.657	0.933	0.535	0.828	chr6	+	31633013	31641553	47	8.7634	8.84454	8.92746	8.47966	7.74785	8.15609	8.27129	8.08157	8.55653	8.45719	8.9584	8.97405
BTN2A2	NM_001197237	17005632	1.374	0.002	0.285	1.106	0.111	0.584	1.107	0.099	0.48	chr6	+	26383324	26395102	23	6.70598	6.62528	6.81385	6.81182	6.88202	6.85865	6.99382	7.03637	6.79189	6.88487	7.32067	7.27151
PVRIG	ENST00000317271	17049237	1.373	0.001	0.248	1.025	0.806	0.951	1.058	0.449	0.784	chr7	+	99815864	99819113	12	4.38216	4.151	4.39043	4.30758	4.80716	4.65125	4.57861	4.9499	4.40605	4.4133	4.8606	4.87218
	---	16716179	1.373	0.004	0.367	1.197	0.174	0.654	0.941	0.463	0.791	chr10	-	88062583	88062678	8	4.51227	4.78656	4.52182	4.60335	4.45256	3.91697	4.45143	4.43741	4.67588	4.60137	4.99627	5.19461
RIC3	NR_045405	16735348	1.372	0.002	0.28	1.207	0.038	0.448	1.053	0.468	0.795	chr11	-	8127592	8190602	22	4.06483	3.91379	4.14016	3.98649	3.76304	3.94635	4.04294	4.20994	3.92323	3.93254	4.33935	4.42797
LPXN	NM_001143995	16738630	1.372	0.006	0.383	1.38	0.002	0.172	1.734	0	0.019	chr11	-	58294344	58345693	22	5.8682	5.82262	6.63565	6.64337	6.88837	6.98402	7.3359	7.46719	6.09737	6.25228	6.52899	6.73236
	---	16915839	1.372	0.019	0.453	1	0.996	0.999	0.962	0.682	0.896	chr20	+	61601336	61604389	15	6.5046	6.67949	6.69954	6.37181	6.78893	6.75455	6.82403	6.71853	6.21558	6.5476	6.93846	6.73605
POM121L8P	NR_024583	16927567	1.372	0.071	0.543	0.973	0.78	0.943	0.957	0.799	0.939	chr22	+	21636714	21652019	10	5.08288	5.09213	5.40631	4.64225	5.37611	5.19857	5.42512	5.07024	4.74697	5.02745	5.05683	5.62993
	---	16806101	1.371	0.071	0.543	1.059	0.592	0.883	1.096	0.152	0.55	chr15	-	24022584	24022690	12	4.00814	4.02699	4.08766	4.21148	4.329	3.91765	4.28741	4.12484	4.47397	4.24737	4.51904	5.11254
	---	16764331	1.37	0.021	0.457	1.179	0.055	0.489	1.042	0.748	0.921	chr12	-	49681292	49683068	19	5.59387	5.04242	5.39841	5.35793	5.17834	5.04454	5.25404	5.44216	4.97815	5.34074	5.52775	5.69839
MIR141	NR_029682	16747663	1.369	0.003	0.348	1.091	0.559	0.871	1.165	0.052	0.39	chr12	+	7073260	7073354	21	4.97311	5.09692	5.32524	5.18513	5.28954	5.80746	5.4626	5.88566	4.29885	4.45193	4.87271	4.78407
LOC729177	NR_034143	17016085	1.369	0.005	0.374	1.026	0.733	0.93	0.86	0.089	0.468	chr6	-	22134831	22147422	21	5.98807	5.81389	5.78548	5.58079	5.92957	5.88375	6.06725	5.82059	5.6588	5.57018	6.17236	5.963
SIX3	ENST00000260653	16879659	1.368	0.052	0.521	1.208	0.047	0.474	0.985	0.782	0.934	chr2	+	45168902	45173216	23	6.15401	6.24672	6.16629	6.19016	5.4917	5.33974	5.80947	5.56857	5.28127	5.83754	6.0446	5.97843
PCDHB12	NM_018932	16990304	1.367	0.002	0.275	0.769	0.05	0.478	1.033	0.694	0.9	chr5	+	140588269	140591698	11	4.12393	4.2846	4.37984	4.1231	6.38855	5.94751	5.88686	5.69198	5.62345	5.67139	6.12047	6.07564
	---	16872733	1.367	0.091	0.573	1.576	0.003	0.212	0.774	0.102	0.484	chr19	-	42648206	42648277	10	5.83226	6.32027	5.87766	5.53619	5.39307	5.58719	6.32941	5.96215	5.75501	5.92303	5.95247	6.62662
TNFRSF14	NM_003820	16658064	1.366	0.005	0.376	1.327	0.007	0.289	0.939	0.495	0.809	chr1	+	2487078	2497061	18	5.63673	5.92211	5.78764	5.58918	6.16734	6.39908	6.73345	6.64854	5.88631	5.82905	6.19631	6.41949
LINC00607	NR_037195	16908115	1.366	0.009	0.403	1.053	0.49	0.842	1.04	0.606	0.864	chr2	-	216476286	216708445	31	4.68354	4.6839	4.87267	4.60947	4.57086	4.79848	4.80185	4.71808	4.41212	4.44826	4.73545	5.0252
MT1P3	ENST00000455178	16918681	1.365	0.002	0.275	0.943	0.531	0.861	1.056	0.393	0.75	chr20	-	33863959	33864117	17	6.45847	6.49726	6.63591	6.47799	6.63716	6.57437	6.34542	6.69782	6.54912	6.5122	6.95514	7.00441
LILRA5	NM_021250	16875448	1.364	0.002	0.285	0.984	0.858	0.963	0.992	0.9	0.972	chr19	-	54818353	54824409	15	3.83765	3.67055	3.79971	3.68399	3.84798	3.67776	3.58759	3.89175	3.79182	3.84358	4.22716	4.30433
TLR3	NM_003265	16972993	1.364	0.002	0.302	1.083	0.205	0.678	2.56	0	0.006	chr4	+	186990306	187006255	30	6.88661	6.80032	8.15228	8.24659	9.00031	8.99522	9.15839	9.06623	8.00746	7.91248	8.37119	8.44552
C22orf26	ENST00000396008	16936070	1.364	0.002	0.312	0.906	0.247	0.708	0.991	0.867	0.962	chr22	-	46445358	46450024	22	6.03347	5.95945	5.95275	6.01348	6.47364	6.2139	6.26146	6.14198	5.77143	5.65903	6.13104	6.19462
	---	16912127	1.364	0.008	0.401	0.921	0.224	0.692	1.479	0.001	0.085	chr20	+	24911303	24912191	12	6.94411	7.0996	7.57262	7.60016	7.77533	7.69054	7.67749	7.5507	4.16331	4.37593	4.62813	4.80789
	---	17111560	1.364	0.097	0.581	1.007	0.923	0.98	0.869	0.201	0.602	chrX	-	55659464	55683447	12	4.64153	4.63088	4.63813	4.229	5.08341	4.88792	4.9845	5.00592	4.22135	4.91632	5.08323	4.94959
SHFM1	ENST00000466986	17060012	1.363	0.076	0.548	1.086	0.195	0.668	1.03	0.8	0.94	chr7	-	96135935	96136010	8	3.21357	3.25441	3.51668	3.03584	3.33491	3.415	3.46141	3.52644	3.33708	3.22984	3.41585	4.04554
	---	16714063	1.362	0.002	0.296	1.053	0.373	0.785	1.097	0.265	0.658	chr10	-	49832049	49833138	17	4.77703	4.51473	4.73872	4.81928	4.56179	4.54115	4.63718	4.61386	4.86634	4.91681	5.29039	5.3856
C1QTNF5	NM_015645	16745322	1.362	0.007	0.383	1.069	0.365	0.782	0.947	0.577	0.849	chr11	-	119209652	119217383	28	5.52389	5.48454	5.61552	5.2351	5.74101	5.60736	5.68367	5.85684	5.29091	5.3356	5.63702	5.88076
POLR2J2	NM_032959	17061138	1.362	0.033	0.486	0.929	0.566	0.874	1.282	0.229	0.626	chr7	-	102277195	102312182	29	5.46355	4.67978	5.61602	5.24402	6.9766	6.51452	6.47867	6.79911	6.70896	6.29776	7.05714	6.84119
	---	17044163	1.361	0.009	0.403	1.001	0.995	0.999	1.173	0.161	0.559	chr7	+	22450336	22452159	19	3.59267	3.85367	4.11735	3.78922	4.06299	3.82355	3.96001	3.92791	3.77512	3.6817	4.30641	4.04025
	---	17065169	1.361	0.019	0.453	1.446	0.001	0.098	1.404	0.003	0.151	chr8	+	1748169	1749522	23	5.4751	5.51079	5.87111	6.09536	4.93436	4.93085	5.51648	5.41339	5.14553	4.94387	5.32983	5.6493
PCNA-AS1	NR_028370	16911149	1.36	0.005	0.37	1.145	0.149	0.628	1.117	0.141	0.536	chr20	+	5100232	5100615	24	7.47106	7.38311	7.4937	7.67915	7.09264	6.78648	7.18131	7.08756	7.1198	6.92918	7.42811	7.50847
BTN3A1	NM_007048	17005655	1.36	0.008	0.399	1.234	0.034	0.438	1.096	0.48	0.801	chr6	+	26402465	26415444	12	4.82685	5.23041	4.97982	5.34233	6.71699	7.00006	7.13111	7.19105	5.17519	5.28148	5.55029	5.7951
	---	17079515	1.36	0.01	0.404	1.018	0.823	0.954	0.807	0.06	0.408	chr8	-	99933461	99933778	11	6.44183	6.09109	5.88819	6.02663	5.75452	5.85875	5.96445	5.70065	5.83251	5.56847	6.07728	6.21183
	---	16915566	1.36	0.017	0.44	1.152	0.054	0.488	0.999	0.994	0.999	chr20	+	60695577	60696630	18	4.24115	4.44794	4.4043	4.28321	4.32592	4.18993	4.44604	4.47805	4.18587	4.54285	4.82327	4.79265
LOC100216479	NR_046258	16902809	1.36	0.043	0.504	0.979	0.777	0.942	1.026	0.68	0.895	chr2	-	131175322	131183103	9	2.97879	2.9066	2.9083	3.05106	2.98371	2.80586	2.7687	2.95811	2.99403	3.10699	3.24577	3.74243
HAAO	NM_012205	16896914	1.359	0.003	0.348	1.037	0.72	0.925	1.039	0.532	0.827	chr2	-	42994229	43019751	21	5.7982	5.70256	5.75369	5.85617	5.69899	5.62436	5.91451	5.51262	5.66099	5.78557	6.21897	6.11417
FLYWCH1	NM_032296	16815259	1.359	0.006	0.383	1.065	0.289	0.734	1.191	0.036	0.345	chr16	+	2961980	3001209	18	7.61049	7.64452	7.7812	7.97832	7.58185	7.63485	7.71918	7.68042	7.14439	7.37194	7.68613	7.71552
KLHL24	ENST00000454652	16948572	1.359	0.008	0.399	1.122	0.085	0.545	1.258	0.01	0.237	chr3	+	183353356	183402307	26	6.68402	6.77079	6.98207	7.13426	8.26535	8.18643	8.41709	8.36592	7.59864	7.42335	7.85416	8.05352
	---	16681840	1.359	0.033	0.486	1.029	0.64	0.899	0.798	0.02	0.288	chr1	-	12630000	12630100	11	4.74703	4.91811	4.59673	4.41842	3.79798	3.83944	3.81077	3.90765	4.00084	3.73474	4.49977	4.12202
	---	16936923	1.359	0.058	0.53	0.975	0.653	0.904	0.952	0.399	0.754	chr3	+	3688140	3688262	11	2.86167	2.75553	2.74396	2.73206	2.76535	2.75223	2.731	2.7139	2.68354	3.14116	3.18677	3.5236
TRO	NM_001039705	17104051	1.358	0.002	0.302	1.094	0.272	0.724	0.933	0.299	0.684	chrX	+	54946895	54957864	19	4.24626	4.32188	4.26228	4.10601	4.20852	4.00268	4.15161	4.31754	3.91202	3.87134	4.28197	4.38524
ATP5J2-PTCD1	ENST00000482251	17060267	1.358	0.039	0.498	1.116	0.101	0.57	1.031	0.592	0.857	chr7	-	99048087	99050232	23	6.30504	6.22189	6.3371	6.27724	6.29722	6.38524	6.46995	6.52886	6.5139	6.21251	6.61201	6.9989
	---	16780853	1.357	0.01	0.404	1.2	0.013	0.35	0.95	0.599	0.86	chr13	-	107109147	107112557	14	5.40049	5.21133	5.06655	5.39733	5.27131	5.26123	5.54377	5.5151	5.13067	5.37873	5.61588	5.77365
MIR34A	EF592573	16681451	1.357	0.038	0.497	1.553	0.002	0.182	1.486	0.002	0.131	chr1	-	9228327	9262678	20	6.22842	6.47981	6.96376	6.88588	6.4476	6.13123	6.83719	7.01185	5.93785	6.37407	6.6959	6.49535
TMEM63B	ENST00000259746	17009132	1.356	0.002	0.287	1.703	0	0.023	1.78	0	0.032	chr6	+	44094651	44123256	23	8.78888	8.96655	9.67678	9.74217	9.04988	9.04217	9.85365	9.77385	8.62441	8.70458	9.0989	9.10757
	---	16875901	1.356	0.003	0.335	1.068	0.35	0.771	0.717	0.003	0.149	chr19	-	57056935	57078782	16	5.7864	5.62514	5.29598	5.15765	5.55995	5.46139	5.5234	5.68746	5.40748	5.26245	5.76038	5.78742
	---	16980685	1.356	0.011	0.409	1.081	0.471	0.833	0.885	0.198	0.598	chr4	-	153099994	153101432	22	4.89981	5.14269	4.7291	4.95885	4.879	4.55353	4.67687	4.98184	4.86171	4.60178	5.09125	5.25003
CYP21A1P	NR_040090	17007109	1.356	0.082	0.559	0.931	0.36	0.778	0.791	0.006	0.194	chr6	+	31973413	31976686	9	6.5521	6.46111	6.20354	6.13217	6.50608	6.25654	6.2627	6.29334	5.75225	6.29677	6.63669	6.29061
NPHS2	NM_014625	16696850	1.355	0.01	0.403	1.191	0.041	0.458	1.027	0.66	0.886	chr1	-	179519674	179545087	22	4.91368	4.78184	4.85889	4.91302	5.00439	4.89	5.10602	5.29242	4.71951	5.00023	5.30202	5.29322
	---	17068338	1.354	0.007	0.383	0.93	0.349	0.771	1.015	0.842	0.954	chr8	+	39891376	39891902	16	4.72595	4.52439	4.55374	4.74155	4.9155	4.67807	4.72801	4.65501	4.38409	4.16873	4.66643	4.76097
ACTA2	NM_001141945	16716350	1.354	0.015	0.429	1.742	0.001	0.132	2.151	0	0.03	chr10	-	90694831	90751147	12	5.08493	5.32147	6.41194	6.20431	6.19976	5.83724	6.9113	6.72811	4.93412	4.81346	5.1531	5.46788
DACH1	NM_080759	16779701	1.353	0.003	0.334	1.027	0.694	0.917	1.045	0.587	0.854	chr13	-	72012098	72441330	22	4.58342	4.5942	4.5079	4.79745	4.95547	4.98674	4.92335	5.09402	5.74825	5.72418	6.10572	6.23782
ARHGEF4	NM_032995	16885638	1.353	0.003	0.335	0.941	0.338	0.767	0.951	0.4	0.754	chr2	+	131594489	131804836	24	6.88951	6.83052	6.73896	6.83806	7.15121	7.10393	7.0966	6.98381	5.71062	5.60715	6.04552	6.14478
RAD51C	ENST00000337432	16836457	1.352	0.002	0.285	1.344	0.002	0.181	1.084	0.159	0.556	chr17	+	56769934	56811703	31	10.5847	10.6264	10.7198	10.7244	9.32635	9.33736	9.69491	9.82186	10.3584	10.2985	10.7692	10.7579
	---	16894779	1.352	0.01	0.404	1.002	0.971	0.995	1.021	0.708	0.905	chr2	-	18604800	18606570	14	3.2077	3.23314	3.29925	3.20211	3.28521	3.1247	3.20597	3.21071	2.96035	3.11084	3.58931	3.35101
OPN1SW	NM_001708	17062704	1.351	0.021	0.46	1.046	0.678	0.913	0.918	0.219	0.617	chr7	-	128412543	128415844	25	5.04134	4.86683	4.79404	4.86525	5.0512	4.64655	5.01889	4.80932	4.85237	4.70221	5.03708	5.3846
MED25	NM_030973	16864331	1.35	0.003	0.324	0.997	0.964	0.992	0.978	0.687	0.898	chr19	+	50321536	50342036	16	7.6536	7.68643	7.60398	7.67301	7.46428	7.45589	7.43325	7.47959	6.35075	6.43633	6.8687	6.78357
CALCA	NM_001741	16736092	1.35	0.034	0.489	1.134	0.092	0.555	0.894	0.121	0.512	chr11	-	14988214	14993900	9	4.32339	4.14567	4.08821	4.0582	4.39943	4.3453	4.63743	4.47001	3.93941	3.98897	4.62331	4.17203
	---	16949867	1.349	0.002	0.302	1.142	0.168	0.647	0.995	0.979	0.995	chr3	+	195362629	195366726	9	9.23137	8.44158	8.92549	8.73378	10.3075	10.5953	10.737	10.5505	8.78228	8.80791	9.27238	9.18144
	---	16677743	1.349	0.002	0.308	1.008	0.898	0.973	1.094	0.46	0.79	chr1	+	222763167	222766374	22	6.32483	6.34977	6.21837	6.7143	6.06354	6.16505	6.16183	6.08931	5.63787	5.71291	6.14204	6.07271
	---	16806103	1.349	0.006	0.383	0.932	0.458	0.828	1.048	0.398	0.753	chr15	-	24405064	24630598	9	2.71803	2.70005	2.74523	2.80675	2.89131	2.6502	2.80684	2.53148	2.73759	2.53289	3.11028	3.02435
RGAG1	NM_020769	17106202	1.349	0.007	0.392	0.988	0.839	0.958	1.038	0.573	0.847	chrX	+	109602044	109699562	21	5.20063	5.14349	5.13592	5.31602	5.43602	5.30144	5.32217	5.37831	4.95101	5.18322	5.53559	5.46253
LOC440925	NR_027433	16904995	1.349	0.023	0.464	0.973	0.708	0.922	0.858	0.023	0.3	chr2	-	171568949	171571077	25	5.64625	5.63703	5.40724	5.43499	5.70855	5.9248	5.80031	5.75549	5.3553	5.1973	5.53014	5.88642
IGFBP3	NM_001013398	17057478	1.348	0.016	0.433	1.106	0.169	0.648	0.906	0.121	0.512	chr7	-	45951844	45961473	23	5.72416	5.634	5.56996	5.50414	5.7355	5.64639	5.91829	5.75324	5.05428	5.39058	5.65566	5.65085
NEUROG3	NM_020999	16715079	1.348	0.034	0.489	1.04	0.542	0.864	0.943	0.447	0.783	chr10	-	71331454	71333210	24	5.81229	5.60066	5.69156	5.55329	5.59014	5.70928	5.66751	5.74357	5.22122	5.60576	5.96126	5.72768
NBEAP1	NR_027992	16805870	1.347	0.002	0.301	1.002	0.973	0.995	1.058	0.422	0.769	chr15	-	20874797	20961480	8	2.87187	3.03873	3.10505	2.97009	3.07843	3.00797	3.03807	3.05398	3.13556	3.17142	3.62446	3.54348
ANKRD19P	NR_026868	17086805	1.346	0.002	0.288	1.026	0.815	0.953	1.064	0.569	0.845	chr9	+	95571893	95600739	10	6.04282	6.3413	6.43825	6.12319	4.50531	4.68026	4.84756	4.41261	4.91809	4.85988	5.30179	5.33512
MIR1323	NR_031568	16865018	1.346	0.002	0.306	1.055	0.507	0.85	0.971	0.728	0.913	chr19	+	54175222	54175294	14	3.42753	3.10495	3.22422	3.22154	3.11619	3.13708	3.34069	3.06615	3.00526	3.09831	3.48909	3.47237
SLC2A12	NM_145176	17023799	1.346	0.002	0.317	1.05	0.413	0.806	1.194	0.014	0.258	chr6	-	134308719	134373789	22	6.0546	6.06387	6.28521	6.34492	6.88379	6.83854	6.96084	6.90102	6.42036	6.39226	6.78473	6.88492
	---	17046772	1.346	0.021	0.457	1.454	0.013	0.346	1.166	0.332	0.708	chr7	+	68527371	68527457	5	9.01316	8.61179	8.76987	9.29707	8.59162	8.29287	9.17412	8.7896	8.3733	8.48563	8.68272	9.03428
PTPN20C	ENST00000316733	16713971	1.346	0.055	0.527	1.268	0.026	0.413	1.328	0.128	0.521	chr10	-	49272334	49348472	9	3.19282	2.55172	3.09568	3.46701	2.7606	2.62507	2.89131	3.17924	2.84985	2.7367	2.96008	3.48415
STARD4	ENST00000296632	16998810	1.345	0.002	0.285	1.253	0.009	0.312	1.285	0.003	0.156	chr5	-	110831731	110848288	26	9.06549	9.12718	9.43692	9.47922	9.09548	9.22324	9.44684	9.52198	8.8037	8.76734	9.20019	9.22666
LRP10	ENST00000359591	16782207	1.345	0.004	0.362	1.191	0.018	0.376	1.406	0.001	0.089	chr14	+	23340822	23350789	21	8.60615	8.51528	9.06236	9.04244	9.57916	9.51787	9.78656	9.81435	8.81813	8.96781	9.28592	9.35674
BEX1	NM_018476	17112918	1.345	0.007	0.392	1	0.998	0.999	0.984	0.898	0.971	chrX	-	102317579	102319168	11	3.98985	3.66369	3.58322	4.02281	3.49344	3.70876	3.49677	3.70475	3.49344	3.63929	4.08818	3.90066
	---	16713441	1.345	0.036	0.493	0.994	0.923	0.98	1.085	0.529	0.826	chr10	-	43169645	43187171	15	4.33734	4.12006	4.09608	4.59795	4.45392	4.51962	4.43234	4.52445	4.36023	4.11784	4.86039	4.47401
GALNT5	ENST00000259056	16886717	1.345	0.075	0.548	1.151	0.082	0.538	1.466	0.001	0.104	chr2	+	158114110	158170723	20	7.9262	7.74459	8.42216	8.35241	4.35168	4.32949	4.65267	4.4354	4.68734	4.21369	5.06495	4.69117
GABARAPL1	ENST00000266458	16748304	1.344	0.005	0.372	1.033	0.593	0.884	1.333	0.019	0.283	chr12	+	10365057	10375727	25	7.27231	7.20577	7.83026	7.47742	7.01188	7.11883	7.12328	7.10059	7.65435	7.831	8.13402	8.20384
STAR	ENST00000276449	17076318	1.344	0.012	0.413	1.117	0.082	0.539	0.88	0.045	0.37	chr8	-	38000218	38008783	20	3.91107	3.95124	3.76089	3.73065	3.9749	3.98348	4.12487	4.15221	3.66793	3.72647	3.97676	4.26994
	---	16769804	1.344	0.027	0.469	1.113	0.372	0.785	1.698	0.01	0.231	chr12	-	109154469	109162474	10	5.53584	6.1647	6.64348	6.58473	3.2177	3.53597	3.72428	3.33834	3.58603	3.39064	3.73771	4.09261
	---	16711907	1.344	0.032	0.482	0.822	0.087	0.546	1.22	0.067	0.423	chr10	-	13553206	13553313	8	2.65315	3.0069	3.13581	3.09809	3.47361	3.25138	2.9057	3.25415	3.75289	4.09962	4.48284	4.22281
STAT3	NM_139276	16845126	1.343	0.002	0.285	1.442	0	0.089	1.509	0	0.044	chr17	-	40465342	40540513	25	10.6473	10.6489	11.2246	11.2589	10.7253	10.6916	11.2147	11.2576	11.0848	11.1168	11.5142	11.537
PTCHD4	NM_001013732	17019820	1.343	0.008	0.399	1.711	0.001	0.123	1.657	0	0.061	chr6	-	47845764	48036425	21	5.08252	4.9135	5.64634	5.80741	4.5755	4.74231	5.26637	5.60208	5.04302	4.97951	5.55283	5.31898
FAM227B	NM_152647	16808997	1.342	0.007	0.383	1.008	0.95	0.989	1.512	0.002	0.13	chr15	-	49619159	49913128	24	4.97925	5.25966	5.69797	5.73387	5.26386	4.88814	5.29733	4.87778	4.82243	4.93759	5.40016	5.20869
	---	16959169	1.342	0.062	0.535	0.886	0.08	0.536	1.089	0.337	0.712	chr3	-	130772161	130791183	15	3.55857	3.34835	3.69479	3.45809	3.42481	3.38576	3.2876	3.17325	3.56605	3.42761	3.65243	4.18824
KIAA1107	ENST00000409154	16667119	1.341	0.005	0.371	0.913	0.179	0.658	1.254	0.016	0.27	chr1	+	92632542	92650280	26	6.93164	7.13904	7.32362	7.39852	7.98393	7.97046	7.91859	7.7716	7.33489	7.15918	7.64221	7.69706
	---	17009989	1.341	0.086	0.566	0.874	0.106	0.576	0.96	0.646	0.88	chr6	+	68256544	68256647	9	3.54445	3.71594	3.42789	3.71476	3.53731	3.75511	3.50764	3.39399	3.4273	3.6551	4.25704	3.67059
RFNG	NM_002917	16850079	1.34	0.003	0.319	1.427	0.002	0.165	1.281	0.005	0.19	chr17	-	80005778	80009719	12	8.95797	8.90966	9.3532	9.22772	9.13572	9.32244	9.69696	9.7877	9.52008	9.47582	9.87681	9.96293
	---	16805896	1.34	0.004	0.361	0.951	0.44	0.818	0.885	0.164	0.563	chr15	-	21941147	21968151	15	3.02418	3.24393	2.86678	3.04916	3.15174	3.20482	3.03115	3.17932	3.22724	3.26066	3.59142	3.73951
CD244	NM_016382	16695447	1.34	0.004	0.366	1.049	0.498	0.846	1.022	0.813	0.946	chr1	-	160799950	160832692	23	4.12241	3.77817	4.02091	3.94224	3.94857	3.75744	3.96249	3.88245	3.7721	3.91973	4.30159	4.23405
BIRC3	NM_001165	16730522	1.34	0.01	0.404	1.206	0.016	0.366	1.317	0.006	0.199	chr11	+	102188181	102210134	19	5.83646	5.90718	6.17126	6.36576	5.90148	6.00855	6.24128	6.20963	5.91318	5.64053	6.19786	6.20071
	---	16994100	1.34	0.01	0.404	1.022	0.704	0.921	1.129	0.067	0.423	chr5	-	3496343	3504118	14	3.52902	3.6065	3.7779	3.7068	3.61773	3.5403	3.60738	3.6141	3.37686	3.46166	3.96969	3.71352
LOC100291105	AK096426	16920614	1.339	0.004	0.367	1.223	0.009	0.312	1.075	0.536	0.829	chr20	-	55959216	55968118	23	4.33074	4.02013	4.46557	4.09516	4.21815	4.23577	4.4916	4.54419	4.1752	4.03613	4.57554	4.47719
MFAP3	ENST00000519612	16991342	1.339	0.007	0.39	0.933	0.369	0.784	0.92	0.215	0.614	chr5	+	153501278	153501581	16	5.79581	5.6773	5.67639	5.55496	6.49852	6.33992	6.41224	6.22678	5.38353	5.59998	5.88218	5.94253
GPR88	NM_022049	16667694	1.339	0.011	0.405	1.061	0.41	0.805	0.885	0.063	0.417	chr1	+	101003693	101007583	27	5.74467	5.75399	5.62228	5.52497	5.42968	5.62132	5.65554	5.5669	5.26345	5.53554	5.81419	5.82706
	---	16901360	1.338	0.005	0.372	1.087	0.32	0.755	1.075	0.35	0.721	chr2	-	105713510	105720606	20	3.5956	3.35159	3.55161	3.60383	3.40598	3.59518	3.51382	3.7272	3.35783	3.53424	3.891	3.84025
	---	16786577	1.337	0.003	0.328	0.894	0.187	0.663	0.967	0.649	0.882	chr14	+	75593856	75603633	22	4.8588	5.03876	4.98287	4.81772	6.35622	6.52386	6.38777	6.16782	5.18876	5.09931	5.53703	5.58825
	---	17099036	1.337	0.013	0.418	0.975	0.699	0.919	0.917	0.413	0.763	chr9	-	132173539	132175738	24	5.68418	5.60882	5.72526	5.31803	5.50019	5.66234	5.53998	5.55013	5.53027	5.28772	5.9146	5.74043
	---	17069168	1.337	0.036	0.492	0.988	0.93	0.983	1.298	0.015	0.266	chr8	+	58469144	58469195	9	3.15905	3.43997	3.65135	3.69996	3.40917	3.67852	3.23634	3.81552	3.60272	3.44167	3.73606	4.1454
	---	16772039	1.336	0.069	0.542	1.12	0.196	0.668	0.881	0.299	0.685	chr12	-	124192149	124192933	16	5.07606	4.59323	4.62951	4.67457	4.66306	4.64296	4.96455	4.66962	4.86098	4.99229	5.06785	5.62115
LAG3	NM_002286	16747402	1.335	0.008	0.399	1.037	0.57	0.876	0.881	0.154	0.552	chr12	+	6881670	6887621	21	5.81311	5.65312	5.67219	5.42708	5.82739	5.91872	5.98076	5.86933	5.38705	5.17701	5.74636	5.65227
MIR3911	NR_037473	17098533	1.335	0.011	0.408	1.075	0.513	0.852	1.112	0.119	0.508	chr9	-	130452966	130453074	9	4.19965	4.11885	4.37378	4.24993	4.47559	4.04061	4.29494	4.42871	4.28652	4.22568	4.80738	4.53805
	---	16835433	1.334	0.002	0.288	0.77	0.026	0.413	1.498	0.002	0.12	chr17	+	46777978	46781655	14	6.10574	6.15381	6.58997	6.83623	10.0796	9.94079	9.80654	9.46021	5.4034	5.41532	5.82175	5.82811
KSR1	NM_014238	16832350	1.334	0.003	0.335	1.544	0.001	0.158	1.873	0	0.017	chr17	+	25783670	25953461	22	7.79557	7.7014	8.614	8.69351	7.38032	7.1869	7.79134	8.03015	7.94508	8.00497	8.43847	8.34359
MIR449B	NR_030387	16996178	1.334	0.006	0.383	1.073	0.29	0.736	1.023	0.73	0.914	chr5	-	54466474	54466570	17	7.14547	6.97049	7.13098	7.05088	6.91053	7.00649	7.00057	7.11982	6.67158	6.70512	7.00817	7.19994
CHST14	NM_130468	16799577	1.333	0.003	0.321	1.213	0.011	0.332	1.141	0.04	0.357	chr15	+	40763160	40765357	20	8.40803	8.44068	8.62306	8.60489	8.9047	8.86826	9.14729	9.18073	9.28756	9.26006	9.64844	9.72868
S100A11	NM_005620	16693280	1.333	0.004	0.367	1.371	0.021	0.393	1.117	0.118	0.508	chr1	-	152004982	152020383	17	7.22494	7.0794	7.35188	7.26961	7.65764	8.10363	8.38013	8.29176	7.46411	7.51836	7.82909	7.98247
GNAI1	NM_002069	17047777	1.332	0.003	0.35	1.185	0.024	0.408	1.059	0.313	0.697	chr7	+	79763271	79848725	22	8.8457	8.90463	8.92616	8.9908	8.15622	8.26885	8.44765	8.46761	7.22055	7.1609	7.54898	7.66131
ZNF708	NM_021269	16870802	1.332	0.007	0.39	0.793	0.092	0.553	0.938	0.281	0.671	chr19	-	21473963	21512212	8	5.83846	5.79922	5.67728	5.77592	5.82845	6.36045	5.74944	5.76857	6.33816	6.17025	6.5997	6.73702
	---	16978831	1.332	0.009	0.403	1.078	0.272	0.724	0.866	0.107	0.491	chr4	-	108908048	108910629	23	3.77569	3.99661	3.76253	3.59635	3.69778	3.83189	3.8221	3.92537	3.85871	3.85036	4.14302	4.39367
TAB3-AS2	ENST00000445240	17102396	1.332	0.06	0.531	1.183	0.238	0.702	1.458	0.022	0.296	chrX	+	30872438	30872824	19	6.47604	6.01773	6.65137	6.93043	6.43246	6.05776	6.72434	6.25213	6.18805	6.14065	6.31303	6.84322
SLC25A45	ENST00000417511	16740378	1.331	0.003	0.319	1.384	0.004	0.227	1.116	0.111	0.497	chr11	-	65142663	65151172	32	6.39039	6.24104	6.48405	6.46314	7.59048	7.50396	7.89974	8.13286	6.27435	6.26445	6.64384	6.72032
INPP1	NM_001128928	16888803	1.331	0.004	0.366	1.418	0.001	0.105	1.848	0	0.021	chr2	+	191208196	191236391	29	6.16539	6.30111	7.09443	7.14407	7.15533	7.22848	7.70221	7.68909	6.78215	6.89157	7.19805	7.30058
	---	16870772	1.331	0.006	0.383	0.886	0.155	0.633	0.739	0.007	0.211	chr19	-	20473327	20473431	8	3.46098	3.67022	3.21465	3.04321	3.67111	3.45916	3.30795	3.47359	3.06862	3.21825	3.49004	3.62063
	---	16805930	1.331	0.008	0.399	1.315	0.025	0.408	0.863	0.118	0.508	chr15	-	22525616	22527776	20	5.31175	5.24844	5.21887	4.91739	5.14882	5.45487	5.57464	5.81971	5.01876	5.13856	5.5885	5.39492
FOLR4	ENST00000440961	16730191	1.331	0.01	0.404	1.042	0.579	0.88	1.235	0.018	0.28	chr11	+	94038759	94040887	17	5.17566	4.98743	5.42617	5.34668	5.36454	5.30832	5.50772	5.28298	5.01021	5.14937	5.38309	5.60087
LOC151171	NR_037809	16909996	1.331	0.011	0.409	0.963	0.619	0.894	0.854	0.063	0.416	chr2	-	239419331	239464140	21	4.9406	4.95423	4.83618	4.60219	4.93024	5.10013	5.04711	4.87586	4.60548	4.75944	5.20793	4.9825
	---	16998642	1.331	0.015	0.431	0.987	0.815	0.953	1.032	0.791	0.936	chr5	-	103718999	104728671	19	4.63861	4.4002	4.35087	4.77744	3.55937	3.58369	3.54086	3.56451	3.30836	3.11601	3.5039	3.74661
SNORD114-17	NR_003210	16788669	1.331	0.023	0.462	0.853	0.101	0.57	0.961	0.596	0.858	chr14	+	101441143	101441217	12	3.59426	3.76483	3.5283	3.71526	3.60446	3.70587	3.57983	3.27303	3.43795	3.38224	3.64432	4.00115
TRBV20-1	ENST00000390394	17052619	1.331	0.043	0.504	1.009	0.877	0.969	0.936	0.366	0.734	chr7	+	142334163	142334913	13	5.38799	5.32359	5.14923	5.3697	5.48952	5.46041	5.46052	5.51481	5.45795	5.22595	5.95468	5.55245
	---	16855322	1.331	0.044	0.506	1.032	0.613	0.891	0.83	0.041	0.362	chr18	-	48810103	48810266	8	3.54479	3.63902	3.43913	3.20963	3.51798	3.42569	3.47392	3.55986	3.27574	3.26192	3.44705	3.91652
ABTB2	NM_145804	16737260	1.33	0.005	0.369	1.246	0.009	0.311	1.14	0.05	0.385	chr11	-	34172534	34379555	27	7.50658	7.50733	7.64721	7.7444	7.39535	7.31218	7.62072	7.72119	8.25947	8.22356	8.57271	8.73286
PRSS48	NM_183375	16971435	1.33	0.028	0.474	0.979	0.77	0.94	1.097	0.138	0.534	chr4	+	152198323	152212605	20	4.42618	4.4364	4.51273	4.61529	4.66278	4.42813	4.50669	4.52229	4.24227	4.04734	4.72638	4.38558
	---	17025840	1.33	0.041	0.5	1.084	0.224	0.692	0.909	0.129	0.522	chr6	-	169575399	169582835	9	3.3894	3.45589	3.3268	3.24415	3.42763	3.34951	3.44668	3.56372	3.11391	3.38979	3.84138	3.48415
TANC1	NM_033394	16886818	1.329	0.006	0.383	0.94	0.414	0.807	1.241	0.022	0.295	chr2	+	159825146	160089170	26	7.38856	7.36708	7.57187	7.805	10.5612	10.4886	10.3235	10.5484	7.81066	7.64932	8.0911	8.18804
LOC100132781	NR_038890	17087211	1.329	0.018	0.448	1.145	0.161	0.64	0.942	0.52	0.821	chr9	+	99631182	99634510	9	4.03751	4.10312	4.15676	3.81163	3.97218	4.26249	4.39821	4.22567	4.01486	4.30947	4.50246	4.64151
MYLK2	ENST00000375994	16912401	1.329	0.024	0.464	1.039	0.634	0.898	0.883	0.06	0.41	chr20	+	30407111	30422500	24	5.16415	5.10589	4.91657	4.99608	4.8958	4.8186	5.04464	4.7791	4.79337	5.15785	5.35608	5.4149
ZACN	NM_180990	16838022	1.329	0.027	0.469	1.052	0.511	0.852	0.93	0.343	0.717	chr17	+	74075263	74078885	24	5.83671	5.85238	5.86238	5.61645	5.92738	5.68188	5.90986	5.84548	5.89823	5.58107	6.04261	6.25715
ARGFX	ENST00000334384	16944559	1.329	0.135	0.617	0.981	0.783	0.944	1.042	0.772	0.93	chr3	+	121286778	121309469	9	4.56179	4.24182	4.19687	4.72566	4.33737	4.52102	4.40797	4.39707	3.90087	4.52993	4.42661	4.82432
LOC285540	NR_037934	16965523	1.328	0.004	0.367	0.899	0.297	0.74	1.088	0.334	0.71	chr4	+	25162263	25202498	23	6.8391	7.02847	6.93402	7.17658	6.30237	6.02645	6.15321	5.86678	6.61887	6.66015	7.12103	6.97631
GPR87	NM_023915	16960567	1.328	0.009	0.402	1.684	0	0.024	9.754	0	0.002	chr3	-	151011874	151034740	19	5.57828	5.77826	8.8978	9.03063	4.25569	4.21726	4.96123	5.01544	3.94357	4.12851	4.51757	4.37189
FLJ27352	NM_001198784	16801299	1.327	0.002	0.302	0.875	0.057	0.492	1.133	0.148	0.544	chr15	+	55700723	55710910	19	6.94222	6.96392	6.99642	7.2706	7.68762	7.58631	7.46236	7.4274	7.44741	7.42652	7.84016	7.84926
MIR1289-1	NR_031620	16918730	1.327	0.003	0.35	1.108	0.263	0.717	1.345	0.004	0.171	chr20	-	34041776	34041919	19	3.13936	3.30364	3.70657	3.59322	3.62323	3.41503	3.5404	3.79296	3.30171	3.35769	3.79019	3.68524
PRKX	NM_005044	17108827	1.327	0.004	0.367	1.703	0	0.021	1.443	0.003	0.151	chrX	-	3522384	3631675	9	9.62399	9.42132	9.96363	10.1395	10.0295	10.0555	10.8281	10.7929	11.1656	11.0618	11.4678	11.5754
PCNA	NM_002592	16916958	1.327	0.005	0.375	1.165	0.034	0.438	1.202	0.013	0.254	chr20	-	5095599	5107272	19	11.2787	11.3061	11.5944	11.5201	10.8653	10.9368	11.1548	11.0879	11.0432	10.8722	11.3815	11.3499
HIGD1B	NM_016438	16834867	1.326	0.005	0.375	1.056	0.376	0.787	1.003	0.956	0.989	chr17	+	42925279	42927844	23	4.93395	4.9287	5.00975	4.86258	4.95071	4.99005	5.09565	5.00146	4.79099	4.7998	5.11546	5.29009
VWA1	NM_022834	16657767	1.325	0.006	0.383	0.963	0.514	0.853	0.846	0.023	0.3	chr1	+	1370241	1378262	25	7.19181	7.13181	6.874	6.96675	7.22779	7.26172	7.20523	7.17661	6.18477	6.18307	6.68782	6.49255
KRTAP5-9	NM_005553	16728509	1.324	0.004	0.355	1.163	0.093	0.555	1.32	0.137	0.532	chr11	+	71259466	71260653	14	4.82113	4.71663	5.53871	4.80009	4.85036	5.00308	5.26145	5.0277	4.53725	4.56613	4.89867	5.01417
	---	17071529	1.324	0.009	0.403	1.355	0.016	0.367	1.686	0.001	0.1	chr8	+	103251622	103265561	22	4.7132	4.93746	5.4524	5.70706	4.48052	4.76855	4.92891	5.19666	4.92902	4.92818	5.21456	5.45318
	---	16890817	1.324	0.11	0.595	1.275	0.005	0.267	0.888	0.453	0.786	chr2	+	219193303	219193403	9	4.84021	5.30568	4.65243	5.14969	4.16051	4.16719	4.45216	4.57554	4.98574	4.45044	4.92341	5.32229
LOC441204	NR_015364	17044458	1.323	0.003	0.348	0.876	0.107	0.578	0.936	0.303	0.688	chr7	+	26438213	26538594	25	5.36336	5.20745	5.17711	5.2018	5.7705	5.54941	5.51168	5.42561	5.19047	5.12468	5.51916	5.60453
TTYH3	NM_025250	17043049	1.322	0.003	0.335	1.32	0.002	0.192	1.388	0.003	0.157	chr7	+	2671585	2704436	29	8.86402	8.67793	9.17953	9.30748	9.42375	9.40109	9.76165	9.86274	9.2564	9.17361	9.60843	9.62858
AK8	NM_152572	17099338	1.322	0.004	0.359	1.193	0.031	0.428	0.908	0.211	0.611	chr9	-	135600965	135754198	32	5.95724	6.19194	5.93592	5.93422	5.8696	5.95726	6.09008	6.24664	5.56141	5.44343	5.89231	5.91864
PLEKHM1P	NR_024386	16847878	1.322	0.007	0.388	1.052	0.42	0.81	1.268	0.024	0.306	chr17	-	62780959	62833302	11	5.5929	5.88035	6.04575	6.11057	5.64369	5.58768	5.74331	5.63342	5.33198	5.53215	5.84043	5.82966
HIST1H3J	NM_003535	17016509	1.322	0.019	0.453	0.728	0.017	0.368	0.806	0.013	0.252	chr6	-	27858093	27858588	9	9.50555	9.33553	9.10723	9.11182	5.6008	5.49182	4.88526	5.29159	5.71728	5.3977	5.98248	5.93866
MAMDC4	NM_206920	17091408	1.322	0.018	0.453	1.591	0.003	0.208	1.261	0.033	0.335	chr9	+	139745395	139755251	25	6.54604	6.45586	6.99105	6.6798	6.47225	6.80382	7.17565	7.43996	6.88483	6.69324	7.3215	7.063
	---	16697425	1.322	0.061	0.532	0.92	0.217	0.687	0.914	0.233	0.629	chr1	-	192844816	192845115	13	3.35029	3.52918	3.24455	3.377	3.05231	3.17501	3.03408	2.95398	2.99535	3.1437	3.22527	3.7197
FRS2	NM_006654	16753943	1.321	0.003	0.336	1.24	0.007	0.283	1.5	0	0.057	chr12	+	69864129	69973562	19	8.08466	8.14182	8.74088	8.65585	7.96165	7.99194	8.27139	8.30315	8.69069	8.60825	9.03191	9.07156
RPL13AP6	NR_026715	16718409	1.321	0.06	0.531	1.02	0.743	0.933	1.099	0.177	0.576	chr10	-	112696361	112697013	8	4.78251	4.92711	4.93789	5.04438	5.11839	5.21115	5.23814	5.14954	5.05152	5.12601	5.745	5.23683
	---	16931858	1.321	0.113	0.597	1.02	0.833	0.957	1.054	0.429	0.773	chr22	-	16199666	16231333	10	3.53477	3.36384	3.56251	3.4888	3.84537	4.05422	4.13361	3.82319	3.29288	3.85054	4.15755	3.78958
CCP110	ENST00000396212	16816479	1.32	0.002	0.317	0.947	0.372	0.785	1.03	0.591	0.856	chr16	+	19535179	19564730	26	10.2774	10.3356	10.3175	10.3811	10.0538	10.0349	10.0163	9.91436	10.5766	10.6066	10.9977	10.9856
FAM163B	NM_001080515	17099573	1.32	0.003	0.321	0.927	0.44	0.818	1.01	0.906	0.974	chr9	-	136443537	136451319	15	5.1064	4.8174	5.02977	4.92265	5.23538	5.4744	5.39631	5.09397	4.86262	4.88715	5.25547	5.29359
	---	16749154	1.32	0.004	0.36	1.04	0.772	0.94	1.007	0.946	0.986	chr12	+	21815247	21919639	15	4.73515	4.47083	4.76623	4.45929	4.11226	4.68778	4.37312	4.53915	4.01658	3.94033	4.33319	4.42363
ZFP36L1	NM_001244701	16794158	1.32	0.004	0.362	0.961	0.477	0.836	1.025	0.645	0.88	chr14	-	69254372	69263190	23	9.00322	8.98657	9.03522	9.02374	9.66496	9.66712	9.6143	9.60165	7.49267	7.55231	7.86792	7.97699
	---	16904256	1.32	0.005	0.372	0.863	0.107	0.578	0.869	0.068	0.426	chr2	-	161777345	161850979	21	5.20806	5.07537	4.87442	5.00541	5.25043	4.96228	4.92198	4.86548	4.89024	4.92233	5.38374	5.23041
	---	17058303	1.32	0.008	0.399	0.891	0.243	0.706	0.918	0.226	0.623	chr7	-	68866188	68866289	8	5.07179	4.90219	4.82072	4.90768	4.52762	4.87539	4.47818	4.59333	4.92571	5.04387	5.29663	5.47277
MIR138-1	NR_029700	16939838	1.32	0.009	0.403	1.069	0.496	0.845	0.994	0.964	0.991	chr3	+	44155704	44155802	23	4.97746	4.38766	4.67893	4.66857	4.45437	4.84035	4.74591	4.74112	4.6566	4.67444	4.9496	5.18121
	---	16936640	1.32	0.033	0.486	1.106	0.123	0.596	0.859	0.036	0.346	chr22	-	50981206	50983413	18	5.9542	5.85883	5.73045	5.64471	5.80862	5.82538	6.01082	5.91422	5.92238	5.64549	6.33027	6.03764
ZNF813	ENST00000396403	16864975	1.32	0.075	0.548	0.857	0.34	0.768	1.163	0.049	0.38	chr19	+	53970989	54006950	8	4.39872	4.53694	4.73718	4.63442	4.675	4.88722	4.89852	4.22019	4.41871	3.97432	4.42698	4.76749
	---	16942889	1.32	0.093	0.575	0.993	0.944	0.987	1.003	0.962	0.99	chr3	+	86531093	86546146	15	3.50132	3.48923	3.54791	3.45026	3.47562	3.37333	3.59923	3.23023	3.49715	3.46875	3.57773	4.18824
SOX9	NM_000346	16837418	1.32	0.122	0.607	1.208	0.017	0.37	1.199	0.015	0.264	chr17	+	70117161	70122561	23	10.0816	9.98948	10.2851	10.3105	10.5327	10.4196	10.7208	10.7778	5.81585	6.47963	6.64119	6.4542
AMZ2	NM_016627	16837298	1.319	0.009	0.403	1.402	0.001	0.115	1.296	0.003	0.151	chr17	+	66244145	66253305	13	11.4958	11.5665	11.9305	11.8804	10.9813	10.9508	11.4877	11.4184	11.0251	10.8328	11.2677	11.3891
CRNN	NM_016190	16693323	1.318	0.007	0.383	1.001	0.994	0.999	0.906	0.114	0.502	chr1	-	152381719	152386750	19	5.97871	5.88277	5.79704	5.77956	5.92374	5.91861	5.83204	6.01186	5.72537	5.60663	6.13696	5.99039
FAM166A	BC132916	17100401	1.318	0.008	0.401	1.057	0.444	0.82	1.008	0.927	0.979	chr9	-	140138036	140142222	18	5.62725	5.37699	5.63785	5.3906	5.54726	5.76025	5.71288	5.75509	5.51507	5.3316	5.8736	5.76809
MOSPD1	NM_019556	17114368	1.317	0.006	0.381	1.178	0.04	0.455	1.019	0.78	0.933	chrX	-	134021656	134049297	20	10.1926	10.2392	10.1438	10.3427	10.46	10.577	10.821	10.6882	8.85965	8.83091	9.32522	9.15946
	---	16964139	1.317	0.008	0.401	0.883	0.182	0.661	1.008	0.908	0.974	chr4	+	2465524	2465851	17	4.81	4.69639	4.68395	4.84461	4.63841	4.96119	4.60275	4.63805	4.93559	4.77734	5.1794	5.32665
	---	16873686	1.317	0.011	0.408	1.372	0.004	0.246	1.241	0.01	0.232	chr19	-	47742378	47747476	22	5.10959	5.18186	5.5152	5.39904	4.70075	4.84685	5.33361	5.12556	4.81061	5.01426	5.2386	5.3794
	---	16872540	1.317	0.037	0.496	1.176	0.035	0.441	0.986	0.904	0.973	chr19	-	41414377	41416754	11	4.43188	3.92192	4.09586	4.21503	4.28698	4.32945	4.61204	4.47207	4.02108	4.41284	4.68206	4.54561
ZNF665	NM_024733	16875176	1.317	0.038	0.497	1.049	0.453	0.825	0.992	0.928	0.98	chr19	-	53666552	53696619	17	3.90065	3.57842	3.7082	3.7482	3.55248	3.46518	3.52469	3.63041	3.42208	3.76301	3.86565	4.11267
	---	16961328	1.316	0.021	0.457	1.244	0.084	0.541	1.007	0.894	0.97	chr3	-	168746750	168749572	14	5.05118	5.10344	5.06859	5.10652	4.89684	4.98614	5.48834	5.02555	4.89272	5.21901	5.43611	5.46724
RORA	NM_134261	16810133	1.316	0.034	0.489	0.898	0.102	0.571	1.064	0.279	0.67	chr15	-	60780483	61521518	24	4.14065	4.22048	4.28585	4.25496	4.87741	4.94996	4.78881	4.72708	5.13735	5.34098	5.46198	5.80819
	---	17064773	1.316	0.036	0.492	1.05	0.57	0.876	0.908	0.134	0.529	chr7	-	155056157	155059857	21	4.33705	4.33476	4.13134	4.2598	4.41768	4.39116	4.63475	4.31599	4.35876	3.9875	4.65407	4.4834
FAAH2	NM_174912	17104201	1.316	0.062	0.535	0.916	0.179	0.658	1.289	0.003	0.156	chrX	+	57313110	57515629	20	5.4335	5.48932	5.79503	5.86044	6.40572	6.38145	6.20554	6.32668	5.67516	5.16553	5.81999	5.81207
	---	17074521	1.316	0.073	0.547	1.123	0.12	0.594	1.026	0.818	0.947	chr8	-	9724417	9724520	10	5.09414	4.65979	4.85123	4.97574	5.03095	4.87143	5.16952	5.06849	4.92646	4.569	4.93764	5.35062
	---	16941049	1.315	0.006	0.383	1.033	0.568	0.875	0.959	0.434	0.776	chr3	+	50378537	50383128	25	5.49072	5.50768	5.43861	5.44038	5.40667	5.35614	5.43241	5.42464	5.26928	5.43462	5.7227	5.77064
CEP85L	NM_001178035	17023066	1.315	0.011	0.408	1.258	0.008	0.304	1.553	0	0.042	chr6	-	118781935	119031238	23	4.31355	4.38851	5.00323	4.96916	4.47497	4.42432	4.71544	4.84633	4.79144	4.7477	5.28399	5.045
CNTNAP3	NM_033655	17094120	1.315	0.023	0.462	1.073	0.529	0.86	0.99	0.909	0.974	chr9	-	39072764	39288456	8	2.87827	2.6494	2.86437	2.63477	2.75911	2.52763	2.94487	2.54384	2.60791	2.57239	2.81699	3.1524
SLC17A7	NM_020309	16874298	1.314	0.005	0.37	0.965	0.661	0.906	0.961	0.66	0.886	chr19	-	49932655	49945617	19	4.79789	4.45642	4.60719	4.53078	4.86042	4.85496	4.95332	4.65777	4.59026	4.59142	4.91302	5.05616
SLC7A11	NM_014331	16979917	1.314	0.005	0.372	1.495	0.002	0.182	1.814	0	0.021	chr4	-	139085248	139163503	26	10.7088	10.7935	11.5633	11.6577	9.42383	9.373	9.82727	10.1305	9.92661	9.91397	10.3879	10.2402
KLK10	NM_002776	16874731	1.314	0.017	0.443	0.978	0.715	0.924	0.923	0.184	0.583	chr19	-	51516000	51523431	24	8.55792	8.53231	8.47682	8.38173	11.0075	11.0812	10.9625	11.0616	7.01666	6.72676	7.22564	7.30622
LOC286254	AK092751	17091265	1.314	0.042	0.502	1.426	0.015	0.358	1.19	0.066	0.422	chr9	+	139440664	139444345	18	6.95723	6.7882	7.24011	7.00735	6.47837	6.91772	7.29384	7.12587	6.78691	7.07076	7.48667	7.1583
	---	16966493	1.314	0.068	0.539	0.993	0.918	0.979	0.876	0.074	0.44	chr4	+	46392272	46435205	24	5.57106	5.4844	5.41227	5.26045	5.34677	5.51839	5.42732	5.41844	4.97734	5.50135	5.61454	5.65245
RN5S158	ENST00000410298	16975201	1.313	0.003	0.335	1.029	0.678	0.913	0.796	0.023	0.303	chr4	-	38760412	38760513	9	3.65932	3.39402	3.2272	3.16698	3.67685	3.69702	3.82592	3.63041	3.51094	3.51691	3.93766	3.87543
	---	16934780	1.313	0.075	0.548	0.958	0.583	0.881	0.984	0.792	0.937	chr22	-	37860583	37862888	18	4.53682	4.42751	4.41415	4.50469	4.68247	4.4981	4.42968	4.62594	4.55435	4.36544	5.10718	4.59765
	---	16775719	1.312	0.025	0.465	1.18	0.057	0.493	0.883	0.173	0.572	chr13	+	87564173	87589062	15	6.33813	6.095	5.94549	6.13006	6.05659	5.87846	6.12368	6.29034	5.83697	6.16806	6.33814	6.45003
LOC100130093	NR_024485	16678257	1.312	0.029	0.477	1.139	0.052	0.481	1.065	0.385	0.744	chr1	+	227916240	227922078	17	6.35105	6.56683	6.52626	6.57296	7.37276	7.37947	7.59414	7.53377	6.6319	6.99818	7.17114	7.24384
GAGE10	NM_001098413	17103608	1.312	0.034	0.489	1.109	0.351	0.772	1.186	0.105	0.489	chrX	+	49160125	49176323	9	3.32357	3.29749	3.37671	3.73716	3.29749	3.32239	3.68339	3.23491	3.70909	3.38153	4.04847	3.82691
	---	16984417	1.312	0.039	0.498	1.053	0.409	0.804	0.873	0.284	0.674	chr5	+	43018531	43024564	11	4.3813	4.18309	4.3192	3.8533	4.26028	4.26706	4.2742	4.40349	3.90989	4.28074	4.39343	4.58181
TESK2	NM_007170	16686438	1.311	0.003	0.332	0.986	0.801	0.949	1.193	0.03	0.328	chr1	-	45809555	45956872	21	6.71209	6.54848	6.91757	6.85052	8.39357	8.305	8.34801	8.30766	7.8529	7.87108	8.23471	8.27159
	---	16974221	1.311	0.038	0.497	0.847	0.031	0.429	0.843	0.028	0.323	chr4	-	8860441	8862553	22	5.18689	5.03984	4.89113	4.84421	5.11196	5.03318	4.89219	4.77547	4.74046	5.14818	5.35163	5.31825
	---	16797731	1.31	0.01	0.404	0.93	0.268	0.721	0.88	0.072	0.436	chr15	+	22512033	22512452	12	5.93444	5.89962	5.80667	5.65822	6.03519	5.95478	5.94424	5.83816	5.70713	5.65679	6.18215	5.9612
	---	17080998	1.31	0.019	0.453	1.063	0.553	0.869	1.039	0.5	0.811	chr8	-	127011238	127013245	10	4.03207	3.96011	4.08812	4.01496	3.65646	4.0425	4.01386	3.86058	3.95628	4.16007	4.56301	4.33398
	---	16991667	1.31	0.055	0.527	1.17	0.081	0.537	0.98	0.875	0.964	chr5	+	158657202	158657330	18	5.36103	5.48719	5.65891	5.13166	5.16093	5.27007	5.56778	5.31573	5.27613	5.63459	5.68862	6.00292
	---	16905052	1.309	0.003	0.335	1.481	0.001	0.115	1.622	0	0.042	chr2	-	172101203	172157685	20	6.11713	6.2265	6.82311	6.91725	6.77248	6.91193	7.34656	7.4725	5.89581	5.8649	6.28435	6.2544
	---	16739250	1.309	0.009	0.403	1.068	0.523	0.857	0.921	0.198	0.598	chr11	-	62168660	62169776	20	5.12391	4.99159	4.94006	4.93951	4.582	4.96802	4.79477	4.94442	4.68492	4.90026	5.1721	5.18875
CIDEC	NM_022094	16950609	1.309	0.031	0.481	0.99	0.921	0.98	0.752	0.027	0.317	chr3	-	9908394	9921938	16	4.95597	4.71301	4.58436	4.26083	4.50498	4.89415	4.70813	4.66312	4.37649	4.53291	5.01485	4.67206
CEBPE	NM_001805	16790739	1.309	0.051	0.52	1.091	0.174	0.653	1.008	0.932	0.981	chr14	-	23586513	23588825	21	5.26642	5.37515	5.15999	5.50454	5.25983	5.18327	5.31611	5.37752	4.83828	5.29773	5.44483	5.4673
GBP6	NM_198460	16666943	1.309	0.234	0.698	0.965	0.656	0.905	1.008	0.95	0.987	chr1	+	89829436	89853719	12	4.15809	4.71829	4.52365	4.37704	4.61339	4.53242	4.65883	4.38261	4.26182	4.30738	4.20323	5.14424
	---	16665099	1.308	0.003	0.335	0.972	0.694	0.918	0.856	0.277	0.667	chr1	+	55461470	55462838	15	5.23701	5.53824	5.41392	4.91132	5.2006	5.33173	5.31607	5.13439	5.15252	5.11529	5.53185	5.51038
SIAE	ENST00000263593	16745658	1.308	0.005	0.372	0.991	0.895	0.973	1.197	0.012	0.249	chr11	-	124503009	124565603	26	9.31487	9.30574	9.55581	9.58182	9.65017	9.47686	9.53024	9.57147	8.69264	8.55267	9.01182	9.00828
MAGEE1	NM_020932	17104995	1.308	0.009	0.402	1.006	0.942	0.987	1.016	0.849	0.956	chrX	+	75648046	75651746	21	5.49548	5.18632	5.34051	5.3876	4.5212	4.77794	4.74909	4.56793	4.4009	4.60645	4.90893	4.87218
	---	16818466	1.308	0.012	0.41	1.218	0.077	0.531	1.106	0.375	0.74	chr16	+	32858958	32859476	8	4.64719	4.91258	5.10645	4.74316	5.23165	4.8752	5.25416	5.4229	4.96985	5.04729	5.28075	5.51066
	---	16813666	1.308	0.019	0.456	0.974	0.709	0.923	1.095	0.138	0.533	chr15	-	98665792	98674836	20	3.14394	3.05266	3.22145	3.23702	3.21096	3.32225	3.13524	3.32132	3.08967	3.38738	3.58972	3.66062
	---	16955793	1.308	0.021	0.46	1.169	0.219	0.688	0.779	0.004	0.172	chr3	-	64057484	64057695	8	5.01963	5.0797	4.64373	4.73463	5.06818	4.55925	5.08464	4.99302	4.66254	4.65249	4.88459	5.20354
LOC100507435	AK093412	17074091	1.308	0.029	0.477	1.015	0.897	0.973	1.057	0.501	0.812	chr8	-	1513675	1570583	18	3.90677	3.618	3.86721	3.81832	3.75588	3.76149	4.03246	3.52831	3.8141	3.71957	4.33099	3.97728
CT45A3	ENST00000443882	17114461	1.308	0.141	0.623	0.959	0.763	0.938	0.932	0.645	0.88	chrX	-	134944381	134953994	25	5.12348	5.57132	5.00069	5.49119	4.2338	3.9546	4.31692	3.74898	3.8537	3.88944	4.61294	3.9037
IRG1	NM_001258406	16775510	1.307	0.01	0.404	0.982	0.769	0.939	0.941	0.298	0.684	chr13	+	77511985	77532794	23	4.1018	4.16316	4.07921	4.01245	4.07245	4.00829	4.06542	3.96388	3.9275	3.94437	4.43216	4.21203
CTNND2	NM_001332	16994388	1.307	0.016	0.44	1.111	0.236	0.7	0.959	0.543	0.833	chr5	-	10971948	11904155	25	5.56258	5.43928	5.52169	5.36013	5.33254	5.52171	5.70055	5.45732	5.07708	5.35887	5.62123	5.58653
	---	17116497	1.307	0.105	0.59	0.851	0.243	0.705	0.806	0.113	0.501	chrY	+	24585087	24631739	8	5.72654	5.25529	5.2775	5.08038	5.6228	5.0574	5.04474	5.17033	4.90514	5.48523	5.68812	5.47484
AKR7A2P1	NR_002796	16668878	1.306	0.003	0.349	1.194	0.02	0.388	0.881	0.086	0.462	chr1	+	113465972	113467295	13	5.1923	5.03747	4.97505	4.88999	5.08474	5.17527	5.41905	5.3532	4.7477	4.68955	5.12198	5.08495
ZNF441	ENST00000454339	16858519	1.306	0.004	0.367	1.335	0.005	0.265	1.399	0.003	0.152	chr19	+	11877815	11894893	16	4.95978	4.73957	5.30209	5.36568	5.47207	5.60476	6.04768	5.86295	6.03252	6.14761	6.46555	6.48397
	---	16957474	1.306	0.006	0.383	0.894	0.246	0.707	0.933	0.221	0.619	chr3	-	112861197	112886666	19	4.48791	4.52791	4.42604	4.39061	4.92071	4.61321	4.69431	4.51651	4.44264	4.33677	4.834	4.71475
	---	16877321	1.306	0.015	0.429	1.037	0.613	0.891	0.891	0.449	0.784	chr2	+	13677798	13749293	16	5.68387	5.21691	5.51089	5.05564	5.52234	5.5613	5.69897	5.48853	5.09218	5.35103	5.56791	5.64508
	---	17009478	1.306	0.015	0.429	1.185	0.058	0.495	0.958	0.436	0.776	chr6	+	47791126	47791286	19	6.34513	6.29818	6.28655	6.23307	6.24438	6.195	6.33788	6.59165	6.25904	6.12396	6.45977	6.69374
	---	17009894	1.306	0.018	0.448	1.24	0.064	0.51	1.117	0.111	0.497	chr6	+	58243374	58243544	14	2.65038	2.76559	2.9227	2.81355	2.91927	2.69405	2.94667	3.28742	2.90559	2.76526	3.34898	3.09183
	---	16746520	1.306	0.023	0.463	1.091	0.309	0.748	0.912	0.343	0.717	chr12	+	312808	314189	19	5.42065	5.56178	5.52595	5.19002	5.43154	5.53551	5.46962	5.74996	5.39779	5.16135	5.77731	5.55141
	---	16920437	1.306	0.101	0.587	1.136	0.06	0.499	1.282	0.044	0.369	chr20	-	51629206	51629286	16	3.45448	3.68003	4.09446	3.7566	3.95458	3.8729	4.09871	4.09617	3.71266	3.75772	4.42182	3.81803
	---	17020700	1.306	0.162	0.644	1.05	0.548	0.867	1.057	0.32	0.702	chr6	-	71897277	71943366	21	4.08621	4.02279	4.12587	4.14317	4.1838	3.98977	4.05758	4.25515	3.86123	4.55399	4.43789	4.74674
C12orf45	ENST00000552951	16756228	1.305	0.003	0.35	1.477	0	0.088	1.406	0.001	0.108	chr12	+	105380088	105443515	21	7.88933	7.94237	8.34108	8.47462	7.86993	7.98372	8.49848	8.4802	8.64881	8.58228	9.01406	8.98523
	---	16782889	1.305	0.005	0.371	1.122	0.109	0.583	1.152	0.279	0.669	chr14	+	24970800	24977894	18	5.88098	5.37885	5.75897	5.90837	4.91156	5.03906	5.19152	5.092	5.14395	5.14806	5.59494	5.46543
LOC728978	NR_038453	16715212	1.305	0.024	0.464	3.11	0.001	0.098	1.26	0.017	0.275	chr10	-	72976981	72977985	21	6.21257	6.20978	6.4248	6.66292	6.86725	7.49494	8.53294	9.10304	6.09662	5.82002	6.43083	6.2529
	---	16991286	1.304	0.026	0.469	0.988	0.873	0.967	0.999	0.979	0.995	chr5	+	151329132	151650009	20	3.27254	3.41849	3.33607	3.35041	3.49115	3.36069	3.30662	3.51104	3.49907	3.16507	3.75408	3.67521
SNORA38B	NR_003706	16837226	1.303	0.035	0.491	1.237	0.013	0.343	1.215	0.015	0.265	chr17	+	65736785	65736917	8	11.6543	11.5267	11.844	11.8982	10.4261	10.3767	10.7837	10.6329	10.495	10.8393	10.9608	11.1378
RNU4ATAC2P	ENST00000408674	16991694	1.303	0.079	0.553	1.04	0.616	0.892	0.944	0.389	0.748	chr5	+	158745050	158745175	9	3.95285	3.8942	3.9276	3.75307	3.24909	3.43532	3.30699	3.48966	3.56785	3.84413	4.3198	3.85677
SULT1C4	NM_006588	16884050	1.302	0.005	0.368	1.039	0.692	0.917	0.891	0.068	0.426	chr2	+	108994367	109004513	20	3.85736	3.79863	3.64022	3.68331	3.98535	3.79143	4.11147	3.77618	3.63243	3.5244	3.94125	3.97822
LOC100134868	NR_004846	16912238	1.302	0.009	0.401	0.98	0.79	0.946	1.685	0.009	0.222	chr20	+	25990435	26002431	8	5.84142	6.39579	6.75118	6.9914	7.55384	7.71927	7.51369	7.70158	7.38592	7.52437	7.90503	7.76694
IL23A	NM_016584	16752645	1.302	0.009	0.403	0.968	0.595	0.884	1.119	0.297	0.684	chr12	+	56732663	56734194	22	5.54668	5.22375	5.67581	5.41829	5.52056	5.46427	5.50098	5.38912	5.30472	5.20699	5.5462	5.72705
LOC148709	NR_002929	16676067	1.301	0.004	0.367	0.717	0.001	0.109	0.929	0.21	0.611	chr1	+	202830882	202844369	16	5.06997	5.02555	4.90705	4.977	5.62042	5.6285	5.14503	5.14321	4.85942	4.75163	5.18738	5.18346
APOL1	NM_003661	16929631	1.301	0.015	0.429	1.16	0.044	0.465	1.032	0.713	0.908	chr22	+	36649056	36663577	8	3.63116	3.34877	3.61151	3.45988	3.15197	3.22195	3.34516	3.45623	3.43839	3.52529	3.73712	3.98562
	---	16994230	1.301	0.015	0.429	1.022	0.746	0.933	0.937	0.283	0.673	chr5	-	7367981	7373626	22	4.25029	4.19427	4.18203	4.07459	4.22478	4.27264	4.35987	4.19874	4.31906	4.35132	4.58348	4.84747
TRBV5-6	ENST00000390375	17063779	1.301	0.036	0.493	1.728	0.028	0.417	1.068	0.31	0.694	chr7	-	142131412	142131918	10	4.56179	4.4604	4.54361	4.66883	6.4029	7.24963	7.4057	7.8251	6.53392	6.87862	7.17386	6.99817
NKX6-3	ENST00000524115	17076627	1.301	0.071	0.543	1.037	0.614	0.891	1.053	0.366	0.733	chr8	-	41502697	41508855	17	4.38236	4.36185	4.4011	4.49253	4.59936	4.54316	4.72632	4.51985	4.25884	4.52443	4.5537	4.98938
LOC100131434	NR_027455	17114856	1.301	0.073	0.547	1.05	0.717	0.925	1.107	0.184	0.583	chrX	-	148583617	148622358	15	3.57432	3.50066	3.79006	3.57838	5.59781	5.09222	5.25624	5.574	4.51283	4.18845	4.93251	4.52812
SOCS4	NM_199421	16784367	1.3	0.003	0.348	1.241	0.007	0.284	1.464	0.004	0.168	chr14	+	55493844	55516207	24	9.62682	9.85559	10.1851	10.3973	10.175	10.1243	10.4615	10.4602	9.91818	9.96547	10.3169	10.3254
DCP1B	NM_152640	16759977	1.3	0.005	0.372	1.329	0.003	0.214	1.546	0	0.04	chr12	-	2055214	2113701	24	6.74074	6.70588	7.33038	7.37448	6.48596	6.631	6.99362	6.94261	6.80898	6.68866	7.11627	7.13742
	---	17014613	1.3	0.009	0.402	0.95	0.552	0.868	0.91	0.226	0.623	chr6	+	166513153	166526761	20	3.56558	3.34908	3.27189	3.3717	3.72778	3.48309	3.42982	3.63279	3.47773	3.65518	3.98281	3.90661
LOC100129794	NR_033240	16783494	1.3	0.009	0.403	1.099	0.202	0.675	1.155	0.151	0.548	chr14	+	37641093	37643016	23	6.05181	5.76718	6.01481	6.22114	5.69775	5.56975	5.84797	5.6918	5.70659	5.89713	6.21653	6.14523
NOXA1	NM_006647	17091733	1.3	0.012	0.411	1.025	0.688	0.916	1	0.999	1	chr9	+	140317802	140328858	19	7.08633	6.93977	7.19801	6.82776	7.73472	7.84168	7.85251	7.79466	6.70679	6.90071	7.1148	7.24887
LBX2-AS1	NR_024606	16881770	1.3	0.023	0.463	1.091	0.201	0.674	0.982	0.872	0.964	chr2	+	74729722	74732192	22	5.96353	5.63735	5.93043	5.61939	6.91331	6.95728	6.98722	7.13569	6.53641	6.23695	6.71232	6.81705
OR2G2	NM_001001915	16679731	1.3	0.041	0.5	0.995	0.934	0.984	0.995	0.948	0.986	chr1	+	247751662	247752615	14	3.86544	3.92079	3.99708	3.77591	3.84764	3.75619	3.7918	3.79813	3.62442	4.00301	4.12199	4.26225
CALHM2	NM_015916	16718047	1.3	0.065	0.538	0.888	0.132	0.609	0.949	0.491	0.807	chr10	-	105206543	105212660	21	8.53619	8.78819	8.59498	8.57801	7.78376	8.00555	7.7407	7.70419	6.03612	6.23408	6.2893	6.73698
	---	17046592	1.3	0.066	0.539	1.304	0.018	0.378	1.054	0.517	0.82	chr7	+	65292534	65293652	14	5.50988	5.54741	5.74651	5.46297	6.18948	5.94914	6.33848	6.56625	4.99472	5.4346	5.48066	5.70713
	---	16958616	1.3	0.088	0.568	1.307	0.029	0.42	1.274	0.027	0.318	chr3	-	125879126	125879288	12	4.40418	4.71912	4.93925	4.88202	5.43571	5.47671	5.64327	6.04168	4.29622	4.44627	4.48154	5.01917
IGLV1-40	ENST00000390299	16927756	1.3	0.088	0.568	0.986	0.814	0.953	0.955	0.474	0.799	chr22	+	22764098	22764614	13	6.48495	6.52537	6.35445	6.52222	6.30897	6.39691	6.36131	6.30421	6.3829	6.92066	7.10162	6.95865
	---	17015134	1.3	0.098	0.581	1.123	0.183	0.662	0.918	0.307	0.691	chr6	-	3051335	3053998	10	6.43578	6.28586	6.35857	6.11612	6.19624	6.4624	6.44285	6.54931	6.08236	5.85092	6.61207	6.07688
LOC286238	NM_001100111	17095559	1.299	0.006	0.383	1.025	0.671	0.91	0.943	0.416	0.765	chr9	-	91242111	91267075	23	3.67652	3.89576	3.69274	3.71102	3.81178	3.74457	3.84054	3.78757	3.6501	3.64526	4.09826	3.95027
STRADA	NM_001003787	16847586	1.299	0.008	0.399	1.121	0.078	0.532	1.321	0.003	0.147	chr17	-	61780192	61819330	32	8.51691	8.57336	8.89654	8.99724	8.20929	8.14951	8.34817	8.34147	8.35701	8.21347	8.6116	8.71307
	---	16920031	1.299	0.009	0.403	1.059	0.42	0.81	0.95	0.6	0.86	chr20	-	47100209	47107082	19	3.70919	3.64479	3.79028	3.41642	3.63095	3.6526	3.82563	3.62319	3.61114	3.60385	3.88321	4.08493
ORM2	NM_000608	17088390	1.299	0.015	0.429	1.042	0.536	0.863	1.053	0.488	0.805	chr9	+	117092069	117095536	12	4.06829	3.89082	3.97502	4.13188	3.84762	4.01045	3.99069	3.98466	3.85048	3.92998	4.39039	4.14474
	---	17055079	1.299	0.017	0.442	1.064	0.369	0.784	1.103	0.19	0.59	chr7	-	6618196	6628605	24	5.33795	5.14191	5.33853	5.424	5.17218	5.31996	5.38612	5.28394	5.27761	5.03906	5.60325	5.46655
BEX5	ENST00000333643	17112855	1.299	0.039	0.498	0.979	0.757	0.936	1.001	0.991	0.998	chrX	-	101408679	101411029	18	4.08557	4.39256	4.27761	4.20333	4.42575	4.26605	4.35533	4.27714	5.96119	5.70974	6.36354	6.06068
TRIM53AP	NR_028346	16743215	1.299	0.045	0.506	0.973	0.8	0.949	0.878	0.055	0.398	chr11	-	89726709	89735676	12	4.95879	4.96962	4.83232	4.72117	4.52574	4.64073	4.31969	4.76669	4.65777	5.04269	5.30946	5.14525
	---	16855941	1.299	0.179	0.657	0.963	0.598	0.886	0.908	0.438	0.777	chr18	-	70951946	70953165	15	3.81177	3.94977	3.98848	3.49354	3.82969	3.82335	3.66389	3.88033	3.79131	3.9111	3.842	4.61437
GPC1	NM_002081	16893169	1.298	0.005	0.368	1.063	0.44	0.818	1.207	0.018	0.279	chr2	+	241375088	241407495	23	8.13801	8.02908	8.40189	8.30964	8.3414	8.22544	8.48886	8.25367	8.02578	8.11419	8.41989	8.47222
C5orf63	ENST00000296662	16999432	1.298	0.059	0.531	0.971	0.615	0.892	1.126	0.078	0.446	chr5	-	126378250	126409184	22	6.84221	6.96435	7.08799	7.06087	7.46992	7.48031	7.39382	7.47175	3.69851	3.30388	4.00141	3.75274
	---	16982983	1.297	0.005	0.375	1.194	0.077	0.53	1.094	0.133	0.528	chr5	+	6773581	6776088	23	4.51473	4.45118	4.62604	4.59795	5.05166	4.85821	5.07607	5.34536	3.93475	4.02035	4.39701	4.30835
PMFBP1	NM_001160213	16828162	1.297	0.009	0.402	0.995	0.957	0.99	1.136	0.087	0.464	chr16	-	72146056	72210777	26	5.88281	6.06107	6.13698	6.17403	6.47115	6.08061	6.27998	6.25681	5.6116	5.45668	5.85578	5.96243
AKAP6	NM_004274	16783230	1.296	0.005	0.376	0.979	0.841	0.959	1.001	0.992	0.998	chr14	+	32798479	33302268	25	5.74095	5.45006	5.5394	5.65398	5.93923	6.38801	6.12875	6.13672	5.30122	5.41813	5.70841	5.75817
	---	16917757	1.296	0.007	0.383	1.058	0.427	0.813	1.03	0.573	0.847	chr20	-	21175044	21198927	23	4.27005	4.32154	4.33	4.3484	4.21259	4.37335	4.30912	4.44071	4.23534	4.38786	4.67495	4.69624
PLA2G4F	NM_213600	16807820	1.296	0.01	0.403	0.983	0.843	0.96	0.948	0.32	0.702	chr15	-	42433332	42448839	18	4.77116	4.76666	4.69398	4.68965	4.79301	5.10559	4.88416	4.96537	4.84314	4.86708	5.32825	5.12921
ZNF763	NM_001012753	16858573	1.296	0.015	0.429	0.674	0	0.097	0.675	0.001	0.077	chr19	+	12075869	12091214	8	4.03379	4.13083	3.57078	3.46284	4.82872	4.78213	4.16898	4.30303	4.62028	4.59223	5.10682	4.85394
	---	16807003	1.296	0.018	0.449	1.048	0.487	0.84	0.858	0.026	0.314	chr15	-	34947820	34962370	14	3.63562	3.58613	3.41545	3.36355	3.51613	3.35578	3.46917	3.53748	3.56306	3.45068	3.75278	4.00988
TSSK4	NM_001184739	16782744	1.295	0.008	0.399	1.039	0.505	0.849	0.966	0.668	0.889	chr14	+	24674903	24677568	21	5.31129	5.28932	5.39234	5.10872	5.30458	5.26249	5.32298	5.3547	5.26283	5.3846	5.63334	5.75935
MIR22HG	NR_028502	16839524	1.295	0.008	0.399	1.282	0.006	0.282	1.536	0.001	0.088	chr17	-	1614798	1619566	40	5.18068	5.39623	5.91076	5.90384	6.95004	6.89	7.35336	7.202	7.11374	7.286	7.55516	7.59124
	---	16971964	1.295	0.008	0.401	1.106	0.218	0.687	0.937	0.251	0.647	chr4	+	159621843	159622060	18	4.32876	4.32098	4.26403	4.19816	4.31405	4.46403	4.63817	4.42921	4.15944	4.15826	4.44259	4.62018
DHRS3	NM_004753	16681827	1.295	0.025	0.464	1.957	0	0.011	1.064	0.291	0.679	chr1	-	12627939	12677820	27	9.4987	9.55738	9.65862	9.5764	6.48613	6.51979	7.471	7.47306	7.21137	6.95957	7.35982	7.55728
LOC100128176	NR_038408	17024549	1.295	0.023	0.464	0.984	0.801	0.949	0.953	0.64	0.877	chr6	-	149275395	149285820	19	4.44116	4.0946	4.08818	4.30881	4.36232	4.34766	4.25596	4.4077	4.21749	4.02978	4.62195	4.37161
NTM-IT1	ENST00000421650	16733591	1.295	0.03	0.477	0.906	0.225	0.693	0.889	0.134	0.529	chr11	+	131416556	131443494	16	5.40038	5.35433	5.09756	5.3181	5.74117	5.50065	5.43284	5.52468	5.64838	5.3038	5.86589	5.83174
	---	16787349	1.295	0.052	0.521	0.988	0.85	0.961	0.891	0.151	0.548	chr14	+	89866339	89875813	19	5.07535	5.16403	4.84322	5.06462	5.08313	4.94605	5.02507	4.96962	4.89786	5.02322	5.12332	5.54304
FAM210B	NM_080821	16915009	1.294	0.003	0.35	1.248	0.008	0.304	1.617	0	0.034	chr20	+	54933971	54943719	17	7.99246	7.8972	8.64583	8.62946	9.47407	9.5047	9.86589	9.75305	9.29696	9.27062	9.64513	9.66678
MYO6	NM_004999	17010461	1.294	0.005	0.369	1.127	0.092	0.553	1.356	0.002	0.12	chr6	+	76458909	76629254	32	9.76951	9.87302	10.2591	10.2606	10.0239	9.88748	10.107	10.1496	8.90174	8.85438	9.20684	9.29254
	---	16756206	1.294	0.009	0.402	1.28	0.016	0.363	0.957	0.696	0.901	chr12	+	104756233	104762789	19	4.90534	4.6625	4.52083	4.91961	4.06015	4.33141	4.53908	4.56401	4.32661	4.24973	4.74618	4.57431
	---	16781184	1.294	0.013	0.417	1.162	0.041	0.457	0.922	0.211	0.611	chr13	-	113804993	113807530	22	7.06685	6.93697	6.91924	6.85045	7.00936	7.02669	7.29651	7.17351	6.94068	6.82584	7.3596	7.15129
	---	16973362	1.294	0.014	0.423	0.933	0.38	0.789	1.045	0.44	0.779	chr4	-	758275	758862	24	6.33361	6.33695	6.35339	6.44262	7.06441	6.80434	6.83007	6.83799	6.34113	6.14725	6.54229	6.69026
IPW	NR_023915	16798085	1.294	0.015	0.429	1.002	0.977	0.996	0.857	0.069	0.427	chr15	+	25295779	25420017	17	5.31021	5.09599	5.0311	4.92862	5.3015	5.1231	5.20925	5.22096	5.21336	5.25578	5.73131	5.48171
	---	16783758	1.294	0.016	0.433	1.108	0.332	0.764	0.965	0.726	0.913	chr14	+	44976610	45007716	9	4.38057	3.97069	4.0844	4.1622	3.58553	4.00372	3.96085	3.92475	3.99668	3.74566	4.27785	4.20928
EPN3	NM_017957	16835909	1.294	0.024	0.464	1.647	0	0.026	1.794	0	0.02	chr17	+	48609904	48621111	28	8.0687	7.96888	8.88407	8.83967	8.15244	8.17531	8.88204	8.88659	6.69584	6.97936	7.27873	7.13965
ZNF705A	NM_001004328	16747907	1.294	0.182	0.659	1.045	0.503	0.848	1.127	0.054	0.394	chr12	+	8290733	8332642	12	2.8495	2.87832	3.04276	3.03084	2.83145	2.78707	2.79376	2.95237	3.07476	2.68899	3.59071	2.9173
	---	16784558	1.293	0.004	0.366	1.11	0.193	0.667	0.92	0.442	0.78	chr14	+	56981049	57018027	18	5.41694	5.26739	5.42529	5.01669	5.21383	5.3847	5.36076	5.54019	5.1557	5.21765	5.58094	5.53461
UPK2	NM_006760	16732045	1.293	0.008	0.401	1.026	0.783	0.944	1.017	0.839	0.953	chr11	+	118795873	118829269	17	5.63074	5.3686	5.43059	5.61941	5.89628	5.65935	5.67142	5.95918	5.46066	5.56042	5.80612	5.95637
GLTPD2	NM_001014985	16829880	1.293	0.012	0.411	1.139	0.1	0.567	0.73	0.002	0.12	chr17	+	4692254	4693884	22	5.62226	5.50865	5.13918	5.08117	5.88405	5.74311	6.08203	5.92177	5.40453	5.54483	5.93423	5.75712
C1orf138	AK127688	16692772	1.293	0.021	0.46	1.224	0.024	0.408	0.804	0.235	0.631	chr1	-	150533480	150533969	18	5.74762	5.56081	5.71002	4.9701	5.6947	5.76641	6.12696	5.91788	5.37976	5.58286	5.74322	5.96077
MIR339	NR_029898	17054323	1.293	0.072	0.544	1.182	0.054	0.488	1.037	0.661	0.886	chr7	-	1062569	1062662	8	7.81428	7.51325	7.71251	7.72031	7.67226	7.86725	7.94334	8.07726	7.17406	7.64823	7.85923	7.70563
GPR78	ENST00000514302	16964948	1.292	0.006	0.383	1.004	0.944	0.987	0.871	0.092	0.473	chr4	+	8580052	8581037	15	3.78451	4.0097	3.72823	3.66604	3.86342	3.99987	3.94035	3.9354	3.90028	4.01647	4.36564	4.29143
	---	16907403	1.292	0.015	0.429	1.103	0.33	0.762	0.911	0.306	0.691	chr2	-	202921651	202922260	24	4.3885	4.13459	4.22927	4.02527	3.99433	4.32114	4.40099	4.19591	3.98889	4.20001	4.52825	4.40079
LOC100506195	NR_038949	16929465	1.292	0.015	0.431	0.85	0.097	0.563	0.922	0.283	0.673	chr22	+	34120972	34146830	20	3.63945	3.40848	3.4128	3.40166	3.88347	3.5591	3.51647	3.45657	3.48742	3.25215	3.69294	3.7858
CDRT15L2	NM_001190790	16832227	1.292	0.091	0.572	1.267	0.052	0.48	1.338	0.005	0.189	chr17	+	20483037	20484224	11	3.19199	2.97654	3.4914	3.51796	3.42718	3.34663	3.5193	3.93592	3.1544	3.36912	3.88576	3.37868
PRAMEF10	NM_001039361	16681862	1.292	0.119	0.604	1.233	0.075	0.526	1.043	0.444	0.781	chr1	-	12952727	12958101	9	6.32075	6.36446	6.43201	6.37485	6.3859	6.80012	6.93218	6.85769	6.29061	6.23637	6.94258	6.32359
BAK1	NM_001188	17018274	1.291	0.004	0.367	1.336	0.002	0.167	1.454	0.001	0.069	chr6	-	33540323	33548070	20	9.37409	9.42662	9.89725	9.98275	9.64958	9.59727	10.0173	10.0665	10.2991	10.2698	10.6142	10.6897
	---	16790110	1.291	0.005	0.37	1.017	0.833	0.957	1.133	0.047	0.376	chr14	-	21161639	21175279	22	5.37666	5.39324	5.57358	5.55591	5.72063	5.45789	5.60291	5.62263	5.46013	5.52399	5.89625	5.82301
	---	16987330	1.291	0.006	0.383	1.067	0.423	0.811	0.947	0.49	0.806	chr5	+	94124494	94129304	17	3.58561	3.74043	3.47263	3.69556	3.53206	3.78953	3.70338	3.80595	3.53721	3.65665	3.99651	3.93338
FLG-AS1	AK056431	16670997	1.291	0.008	0.401	2.469	0	0.015	1.173	0.021	0.293	chr1	+	152161327	152339312	42	4.76104	4.80723	4.99424	5.03455	5.75818	5.52709	7.05688	6.83711	5.30532	5.13426	5.57914	5.59849
MIR4492	NR_039713	16732043	1.291	0.008	0.401	0.93	0.297	0.74	0.913	0.127	0.52	chr11	+	118781417	118781496	9	6.93538	6.88698	6.80196	6.75824	6.76463	6.8495	6.62444	6.78089	6.84815	6.79944	7.10906	7.27549
RABL2B	NM_001130921	16936732	1.291	0.017	0.44	1.177	0.091	0.553	1.243	0.013	0.256	chr22	-	51205920	51222091	10	6.98837	7.11933	7.43221	7.30437	6.37775	6.3474	6.43953	6.75574	7.05503	6.93794	7.48186	7.2483
LOC100506978	XR_110102	16759534	1.291	0.025	0.464	1.033	0.681	0.913	0.826	0.107	0.491	chr12	+	133033746	133036610	14	6.23805	5.94095	5.96561	5.66103	6.11472	6.07028	6.27819	6.00164	5.9822	6.18557	6.33275	6.57349
	---	16853617	1.291	0.06	0.531	1.111	0.202	0.674	0.838	0.012	0.251	chr18	-	5132758	5133171	12	4.58822	4.57788	4.33064	4.3263	4.58786	4.49896	4.81758	4.57247	4.51005	4.36099	5.02185	4.58792
LOC441461	NR_038853	17096574	1.291	0.064	0.536	1.045	0.56	0.872	1.621	0	0.051	chr9	-	102648599	102668883	15	4.3678	4.48395	5.0521	5.19422	4.7791	4.69956	4.92366	4.68384	4.68259	4.42027	4.72506	5.11467
	---	16733038	1.291	0.067	0.539	0.955	0.552	0.868	0.865	0.259	0.654	chr11	+	125147448	125147553	8	3.73104	3.38227	3.53546	3.15699	3.46272	3.37597	3.2311	3.47463	3.42947	3.23182	3.48036	3.91904
CACNG7	NM_031896	16865153	1.291	0.076	0.548	1.093	0.278	0.728	0.994	0.928	0.98	chr19	+	54412589	54447195	18	4.65846	4.62197	4.5245	4.7379	4.49773	4.72812	4.80951	4.67239	4.70465	5.20599	5.29256	5.35494
ID4	NM_001546	17005223	1.291	0.097	0.581	0.854	0.025	0.408	0.927	0.217	0.615	chr6	+	19837601	19842431	21	4.34343	4.42902	4.31721	4.23609	4.59518	4.5561	4.34558	4.35035	4.1805	4.40911	4.92343	4.40505
	---	16658639	1.291	0.177	0.655	0.961	0.586	0.882	1.126	0.184	0.583	chr1	+	9142755	9142938	11	3.9674	4.11351	4.08104	4.34282	4.23011	4.21972	4.28185	4.05268	4.16323	3.93442	4.77675	4.05719
	---	16807420	1.29	0.01	0.404	1.068	0.421	0.81	0.945	0.444	0.781	chr15	-	40661126	40661841	23	5.85914	5.64995	5.7298	5.61477	6.37966	6.13387	6.41787	6.28492	5.51021	5.50694	5.77619	5.97582
APBB1	NM_001164	16735018	1.29	0.018	0.452	1.008	0.901	0.974	0.982	0.8	0.94	chr11	-	6416354	6440644	38	5.69768	5.5573	5.69071	5.51234	5.25913	5.10601	5.15057	5.23825	5.86703	5.64087	6.04488	6.19775
	---	17005108	1.29	0.051	0.519	0.776	0.018	0.374	1.158	0.057	0.401	chr6	+	16761369	16762883	24	5.95266	5.77065	6.06886	6.07852	7.27768	7.10438	6.70403	6.94827	5.41224	5.78316	6.06761	5.86137
TNNI1	ENST00000336092	16697909	1.289	0.01	0.403	1.136	0.207	0.679	0.938	0.424	0.77	chr1	-	201372895	201398994	18	5.89598	5.75447	5.61228	5.85143	5.57994	5.84747	6.02862	5.76658	5.32803	5.51824	5.78632	5.79218
UBA7	NM_003335	16954217	1.289	0.025	0.464	0.907	0.118	0.591	0.921	0.223	0.62	chr3	-	49842638	49851391	26	5.04629	5.06613	4.85482	5.02119	5.22614	5.20447	5.09434	5.05483	5.12942	4.83835	5.40731	5.29336
TMEM107	NM_032354	16840885	1.288	0.005	0.369	0.911	0.239	0.702	1.17	0.032	0.334	chr17	-	8076296	8079717	30	7.25829	7.3794	7.52669	7.5635	7.24798	7.32495	7.03294	7.26952	7.1499	7.07778	7.4988	7.45855
LOC440993	AK128346	16949911	1.288	0.005	0.369	0.961	0.502	0.848	1.17	0.141	0.537	chr3	+	195427192	195428540	21	6.22866	6.27449	6.28987	6.66472	6.72563	6.63473	6.6087	6.63585	4.79583	4.86254	5.16664	5.22188
SPRY1	NM_001258038	16970435	1.288	0.008	0.401	1.238	0.007	0.292	1.669	0	0.028	chr4	+	124317950	124324910	26	5.86623	5.94031	6.61849	6.66536	6.71894	6.67019	7.02051	6.98503	7.51102	7.65297	7.99378	7.89946
	---	17077702	1.288	0.015	0.429	1.17	0.043	0.463	1.04	0.709	0.905	chr8	-	64599737	65281115	21	3.73857	4.08957	3.85578	4.08437	3.69764	3.82973	4.03677	3.94294	4.00796	3.92953	4.22051	4.44606
CREBRF	NM_153607	16992467	1.288	0.028	0.472	1.183	0.053	0.483	1.25	0.023	0.3	chr5	+	172483355	172566291	32	6.03826	5.85394	6.17723	6.35865	6.07489	5.9966	6.38962	6.16636	6.42284	6.22391	6.55952	6.81712
PNPLA5	NM_138814	16935892	1.288	0.039	0.498	1.038	0.527	0.859	1.025	0.778	0.932	chr22	-	44275558	44287893	28	6.16256	5.85595	5.9799	6.11033	5.16532	5.17429	5.26754	5.1801	4.89882	5.08561	5.52272	5.19242
TRIM22	NM_006074	16721280	1.287	0.005	0.376	1.093	0.149	0.627	1.318	0.01	0.238	chr11	+	5710817	5758319	27	3.79151	3.87479	4.35669	4.1047	3.76961	3.74609	3.86887	3.90244	3.91749	4.02662	4.3343	4.33754
FITM1	NM_203402	16782609	1.287	0.013	0.421	1.022	0.804	0.95	1.085	0.234	0.631	chr14	+	24600484	24602058	15	5.50534	5.32749	5.55571	5.51396	5.52452	5.37788	5.63888	5.32751	5.25721	5.47681	5.7626	5.69945
	---	17080557	1.287	0.025	0.464	0.923	0.188	0.664	0.959	0.786	0.935	chr8	-	120724070	120724385	14	5.28295	5.10618	4.80382	5.46356	5.10771	5.07895	4.96149	4.9953	4.99737	4.91096	5.46688	5.16923
NIPAL3	NM_020448	16683605	1.287	0.025	0.465	0.921	0.274	0.725	0.938	0.331	0.708	chr1	-	24796844	24796929	19	4.59683	4.51717	4.38764	4.54075	4.48663	4.28146	4.22139	4.30869	4.32248	4.30443	4.83201	4.52197
	---	16997172	1.287	0.043	0.504	1.093	0.212	0.683	1.03	0.592	0.857	chr5	-	73073864	73082316	18	4.38278	4.28489	4.36834	4.38631	4.19912	4.37496	4.39202	4.43884	4.60004	4.27665	4.69044	4.91467
STON2	NM_033104	16795368	1.286	0.004	0.367	0.974	0.768	0.939	1.361	0.037	0.348	chr14	-	81727000	81902809	34	5.40118	5.31348	6.04878	5.5559	4.58778	4.49718	4.67257	4.3355	4.78197	4.84913	5.1887	5.16891
	---	17101166	1.286	0.008	0.399	1.039	0.526	0.858	1.013	0.875	0.964	chrX	+	1780739	1781265	23	4.44652	4.18415	4.30352	4.3622	4.19887	4.17864	4.19743	4.28915	4.11254	4.15153	4.57133	4.41901
GPR149	NM_001038705	16960682	1.286	0.027	0.469	1.045	0.528	0.859	1.083	0.187	0.587	chr3	-	154055461	154147504	18	4.82185	4.80998	4.87997	4.98286	4.88843	4.91338	5.06611	4.86382	4.5372	4.77035	4.90861	5.12472
LOC338758	NR_028138	16754966	1.286	0.032	0.481	1.06	0.34	0.768	1.056	0.373	0.738	chr12	+	90102732	90105729	19	3.9546	4.03691	4.12488	4.02281	4.06614	4.00283	4.08453	4.15186	4.27528	4.10252	4.40372	4.70045
	---	17080849	1.286	0.038	0.497	1.195	0.02	0.387	0.981	0.869	0.963	chr8	-	125204912	125259639	18	6.03631	5.67208	5.97378	5.6811	5.75212	5.86471	6.05725	6.07373	5.56452	5.8401	5.94312	6.18709
	---	16981882	1.286	0.059	0.531	1.074	0.261	0.715	0.909	0.301	0.687	chr4	-	184097914	184098084	22	5.06053	4.73314	4.72286	4.79418	4.64546	4.61097	4.67503	4.78837	4.62813	5.07215	5.22785	5.19746
LCE1C	NM_178351	16693341	1.286	0.067	0.539	0.999	0.976	0.996	1.067	0.327	0.706	chr1	-	152777311	152779107	12	4.63985	4.52957	4.74687	4.61055	4.56531	4.52155	4.55028	4.53173	4.70442	4.58537	4.77965	5.23586
PIK3R3	NM_003629	16686557	1.285	0.004	0.362	1.137	0.096	0.561	1.025	0.633	0.875	chr1	-	46505812	46642160	39	6.26688	6.22945	6.29519	6.27359	8.65587	8.47317	8.71502	8.78438	7.90952	7.9042	8.2561	8.28106
OR10P1	NM_206899	16752183	1.285	0.005	0.375	0.947	0.398	0.799	0.981	0.738	0.917	chr12	+	56030644	56031638	12	5.84863	5.72647	5.74629	5.7727	5.73553	5.77497	5.6138	5.74169	5.65093	5.58762	6.02143	5.94079
PLA2G6	NM_003560	16934929	1.285	0.007	0.392	1.031	0.612	0.891	1.061	0.281	0.671	chr22	-	38507502	38588107	32	6.47395	6.50384	6.59535	6.55476	6.4769	6.41079	6.44158	6.53497	6.03575	5.91895	6.38273	6.29618
ST6GALNAC5	ENST00000477717	16666336	1.285	0.01	0.404	0.997	0.958	0.991	1.006	0.917	0.976	chr1	+	77333126	77531396	27	5.30735	5.40851	5.32459	5.40897	5.29827	5.31856	5.29107	5.31722	4.99604	5.15177	5.37941	5.49205
CETP	ENST00000200676	16819336	1.285	0.012	0.411	1.032	0.585	0.882	0.921	0.197	0.598	chr16	+	56995762	57017757	23	5.84819	5.83738	5.79054	5.65921	5.86068	5.89283	5.94866	5.89549	5.67939	5.67796	5.93529	6.1453
DEFB132	NM_207469	16910589	1.285	0.013	0.416	1.048	0.583	0.881	0.877	0.052	0.391	chr20	+	238377	241737	18	4.58449	4.60242	4.4562	4.35365	4.49988	4.37226	4.36492	4.6404	4.22449	4.41009	4.61832	4.74041
	---	16777963	1.285	0.017	0.44	1.17	0.056	0.491	1.006	0.952	0.988	chr13	-	32994527	32994653	10	5.40868	5.17305	5.12171	5.47806	5.69558	5.49451	5.844	5.79735	5.21816	5.27747	5.48759	5.73167
RN5S434	ENST00000516647	16839971	1.285	0.041	0.5	0.903	0.175	0.654	0.944	0.36	0.729	chr17	-	3960050	3960170	20	5.251	5.37956	5.19237	5.27149	5.47369	5.56423	5.27848	5.46448	5.35207	5.30787	5.5037	5.8803
GUSBP4	AK023611	17020483	1.285	0.087	0.567	1.224	0.018	0.375	1.202	0.011	0.247	chr6	-	58246159	58287779	8	6.41208	6.45396	6.71688	6.68135	7.29904	7.16232	7.46686	7.57927	6.68828	7.17901	7.38982	7.20219
	---	16683866	1.285	0.093	0.575	0.988	0.919	0.979	1.053	0.504	0.813	chr1	-	26789247	26793773	19	3.66298	3.39805	3.60598	3.60553	3.80902	3.91021	3.60347	4.08224	3.68107	3.14298	3.75201	3.79512
LOXL1	NM_005576	16802903	1.284	0.006	0.383	1.103	0.141	0.619	1.12	0.097	0.479	chr15	+	74218789	74244478	23	7.89661	7.87545	7.97841	8.12205	9.27749	9.29078	9.36491	9.48747	7.08461	7.0003	7.44272	7.36377
SIGLEC11	NM_052884	16874453	1.284	0.006	0.383	0.926	0.353	0.774	0.874	0.075	0.441	chr19	-	50452242	50464429	14	5.6643	5.69198	5.57471	5.39337	5.71984	5.44345	5.44473	5.49723	5.27572	5.39804	5.68407	5.71228
LOC730227	NR_034151	16698226	1.284	0.013	0.416	1.297	0.017	0.373	1.235	0.009	0.224	chr1	-	203267886	203274453	21	4.26571	4.15802	4.50336	4.52914	4.18236	4.31752	4.48355	4.76559	4.24018	4.19478	4.68676	4.47052
	---	16738701	1.284	0.018	0.447	0.99	0.894	0.973	0.897	0.334	0.71	chr11	-	59036349	59051506	15	5.21999	4.79245	4.79034	4.90779	4.97804	5.22176	5.12232	5.04836	4.56883	4.76529	4.94328	5.11382
	---	16895979	1.284	0.021	0.457	0.962	0.495	0.844	0.897	0.105	0.488	chr2	-	27957840	27958477	19	6.08732	5.99133	5.83382	5.93087	6.03481	6.03964	6.00453	5.95707	5.84971	6.11121	6.39098	6.29239
RNU12-2P	ENST00000364789	17102994	1.284	0.024	0.464	1.006	0.942	0.987	0.961	0.622	0.87	chrX	+	46992070	46992225	8	4.87247	4.93353	4.98501	4.70609	4.90628	4.56913	4.73174	4.76225	4.72783	5.00171	5.16443	5.28705
SPATA7	NM_018418	16787236	1.284	0.035	0.491	1.077	0.236	0.7	1.451	0	0.058	chr14	+	88851268	88936694	24	5.21711	5.23336	5.74839	5.77706	6.55722	6.49611	6.59478	6.67271	5.44255	5.79448	5.95253	6.0074
OR5A2	NM_001001954	16738704	1.284	0.067	0.539	0.908	0.261	0.716	1.045	0.49	0.806	chr11	-	59189416	59190449	9	3.63832	3.72562	3.67776	3.81185	3.97411	3.811	3.87589	3.62937	3.49098	3.49401	3.62053	4.08723
TRBV24-1	ENST00000390397	17052625	1.284	0.077	0.551	1.063	0.403	0.801	1.135	0.094	0.475	chr7	+	142364198	142364710	8	4.43317	4.57457	4.62051	4.75327	4.51914	4.40731	4.64177	4.45985	4.14079	4.59844	4.82743	4.6335
RALGAPB	NM_020336	16913574	1.283	0.004	0.367	1.127	0.103	0.572	1.393	0.001	0.086	chr20	+	37101459	37207504	37	9.38026	9.42582	9.87138	9.88978	10.2763	10.1149	10.3405	10.3968	9.97347	9.93731	10.3272	10.3016
	---	16956351	1.283	0.005	0.369	1.032	0.58	0.88	1.221	0.016	0.271	chr3	-	75691158	75695597	22	3.55115	3.51549	3.90093	3.74264	3.73292	3.78563	3.82689	3.7841	3.64192	3.61904	4.02309	3.95755
MIR3116-1	NR_036058	16688002	1.283	0.01	0.404	1.229	0.01	0.316	0.899	0.508	0.815	chr1	-	62544461	62544528	14	5.43475	4.81343	5.12504	4.81696	5.29764	5.22055	5.58255	5.53135	5.15547	5.31414	5.54458	5.64323
LOC100270679	NR_038394	16912011	1.283	0.02	0.457	1.008	0.887	0.971	1.038	0.734	0.915	chr20	+	22034728	22055292	20	5.0257	5.00049	4.84105	5.29331	5.08781	5.09501	5.09402	5.11164	5.00651	5.15642	5.32572	5.55766
RN5S372	ENST00000390836	16756625	1.283	0.029	0.476	1.159	0.209	0.68	1.048	0.433	0.775	chr12	+	109497791	109497905	11	2.96298	3.03548	3.1132	3.01865	3.13281	2.95842	3.04264	3.4754	2.98474	3.0968	3.55198	3.24919
CADM3	NM_021189	16672412	1.283	0.039	0.498	1.025	0.717	0.925	0.896	0.411	0.761	chr1	+	159141377	159173103	18	4.77894	4.56816	4.77195	4.25778	4.60642	4.52583	4.69666	4.50847	4.23822	4.53587	4.85321	4.63844
C14orf176	ENST00000418511	16781732	1.283	0.04	0.5	1.38	0.012	0.335	1.481	0.002	0.137	chr14	+	21567096	21571883	29	5.18076	4.90694	5.60738	5.6134	5.71382	6.06235	6.27595	6.43121	5.43289	5.32873	5.56105	5.91901
SNHG3	NR_036473	16684175	1.283	0.084	0.565	1.303	0.004	0.227	1.139	0.056	0.399	chr1	-	28835514	28837109	24	5.18356	5.11346	5.29049	5.38318	5.11212	4.98881	5.44318	5.42204	5.71907	5.68217	5.80358	6.31608
FRAT1	NM_005479	16707955	1.283	0.089	0.571	0.99	0.915	0.978	1.181	0.017	0.274	chr10	+	99079022	99081672	21	4.76894	4.75736	4.98358	5.02284	5.65132	5.37212	5.3693	5.62485	5.27462	4.81694	5.53403	5.2746
	---	17078388	1.283	0.118	0.603	0.772	0.009	0.312	1.317	0.008	0.217	chr8	-	76135639	76236976	11	4.98572	5.20974	5.45581	5.53403	6.72481	6.75802	6.48186	6.25438	4.96387	4.6818	5.44585	4.91847
TPTE2P3	NR_002793	16775030	1.282	0.008	0.401	0.906	0.393	0.797	0.865	0.176	0.575	chr13	+	53063128	53161230	11	2.85016	2.90695	2.86315	2.47326	3.08283	2.63272	2.79961	2.62987	2.48291	2.63799	2.90875	2.92764
	---	16795004	1.282	0.01	0.404	1.188	0.09	0.551	0.82	0.012	0.25	chr14	-	76961706	77193055	19	5.56894	5.4656	5.2018	5.26139	5.28277	5.47406	5.77128	5.48295	5.19192	5.1843	5.45217	5.63976
	---	16846148	1.282	0.022	0.462	0.913	0.263	0.717	1.38	0.029	0.326	chr17	-	45968595	45973178	12	6.11747	5.84295	6.64648	6.24437	6.48643	6.44986	6.46843	6.20295	5.87744	6.04734	6.43571	6.20549
	---	16725108	1.282	0.045	0.507	0.938	0.28	0.729	0.837	0.092	0.472	chr11	+	59436785	59443514	13	3.93273	4.07864	3.91143	3.58639	3.96889	4.00519	3.91892	3.86897	3.79497	3.88456	4.38829	4.00777
	---	16772345	1.282	0.067	0.539	0.869	0.167	0.646	1.049	0.684	0.896	chr12	-	128243393	128246816	21	3.69809	3.70426	4.0131	3.52664	4.18121	3.81274	3.81787	3.7706	3.71622	3.72076	3.84586	4.30757
LUM	ENST00000266718	16768406	1.282	0.117	0.603	0.945	0.341	0.768	1.052	0.491	0.807	chr12	-	91496406	91505608	24	3.42913	3.20071	3.36203	3.41369	3.38063	3.42783	3.31409	3.33328	4.11823	3.54241	4.11462	4.26123
CROCCP3	NR_023386	16682203	1.282	0.123	0.608	0.884	0.08	0.536	0.908	0.1	0.482	chr1	-	16793931	16819196	11	4.96013	4.97088	4.83351	4.8195	5.58597	5.46734	5.37876	5.31761	5.29358	5.14161	5.87006	5.28129
	---	16678511	1.281	0.005	0.375	1.023	0.711	0.923	1.079	0.546	0.835	chr1	+	228688983	228697976	18	5.5865	6.02387	5.7662	6.06493	7.7012	7.75235	7.69774	7.82228	5.20371	5.21481	5.5199	5.61358
NOTCH1	NM_017617	17100036	1.281	0.006	0.378	1.582	0.001	0.111	1.51	0	0.053	chr9	-	139388896	139440314	27	8.49851	8.57833	9.1031	9.16335	8.45502	8.21659	8.94175	9.05304	9.89486	9.80135	10.2231	10.1878
TNIP1	NM_001252390	17001763	1.281	0.006	0.383	1.117	0.081	0.537	1.386	0.001	0.111	chr5	-	150409504	150473138	27	7.02433	7.04384	7.56743	7.44351	7.44446	7.45197	7.62168	7.59525	7.3546	7.37273	7.77501	7.66707
ARVCF	NM_001670	16932394	1.281	0.008	0.398	1.053	0.379	0.789	1.324	0.003	0.148	chr22	-	19957402	20004331	35	7.04912	6.98257	7.473	7.36961	6.95085	6.97668	7.06077	7.01466	7.15179	7.12738	7.56672	7.42575
MFSD4	NM_181644	16676498	1.281	0.024	0.464	1.202	0.05	0.478	1.269	0.016	0.268	chr1	+	205538013	205572046	23	6.08944	5.98846	6.27177	6.49444	6.72188	6.72832	6.85199	7.13048	5.84478	6.11932	6.38895	6.29008
	---	16737577	1.281	0.024	0.464	1.075	0.487	0.84	0.889	0.092	0.472	chr11	-	44994327	44995338	20	4.65204	4.69879	4.57791	4.43301	4.86246	4.44002	4.72678	4.78667	4.29539	4.48303	4.85793	4.63469
	---	16803613	1.281	0.037	0.497	0.937	0.323	0.757	0.875	0.038	0.352	chr15	+	79271231	79278268	19	5.36144	5.33509	5.16512	5.14777	5.33991	5.28898	5.15213	5.28976	4.87474	5.22522	5.44481	5.36898
SCN8A	NM_014191	16751319	1.281	0.039	0.498	0.856	0.087	0.546	0.999	0.991	0.998	chr12	+	51984050	52202307	18	6.65041	6.86638	6.70806	6.80645	6.04816	5.76777	5.66866	5.69867	4.72062	5.07127	5.30033	5.20555
	---	16885345	1.28	0.005	0.372	1.08	0.222	0.691	0.922	0.156	0.553	chr2	+	128229810	128229991	16	2.73262	2.69176	2.59732	2.59208	2.6416	2.59823	2.77485	2.68638	2.53893	2.61	2.94827	2.91348
IRX1	NM_024337	16982828	1.28	0.008	0.399	1.095	0.157	0.636	0.957	0.431	0.774	chr5	+	3596168	3601517	20	6.20359	6.12234	6.10183	6.09753	6.11763	6.20526	6.274	6.31004	5.90193	5.83307	6.15899	6.28819
KRTAP27-1	NM_001077711	16924808	1.28	0.011	0.408	1.074	0.541	0.864	1.021	0.701	0.903	chr21	-	31709331	31710012	16	3.94296	4.01519	4.00388	4.01411	3.80632	4.30179	4.18421	4.13077	3.76568	3.91347	4.13645	4.25428
TAS2R19	ENST00000390673	16761514	1.28	0.021	0.46	0.935	0.551	0.868	1.16	0.152	0.55	chr12	-	11174218	11175219	13	3.57829	3.93871	3.93652	4.00864	3.56931	3.39263	3.60255	3.16583	3.24753	3.4992	3.67223	3.78734
PRR23C	NM_001134657	16959752	1.28	0.03	0.477	0.945	0.505	0.849	1.009	0.873	0.964	chr3	-	138760944	138763734	15	4.94479	4.88226	4.89176	4.9608	5.272	4.9608	5.02722	5.04073	5.01756	4.70915	5.17386	5.26449
ERVK3-2	AK096726	16785894	1.28	0.046	0.511	0.981	0.776	0.942	1.009	0.906	0.974	chr14	+	70278479	70283285	17	5.12441	5.06985	5.22965	4.98974	5.19826	5.19066	5.26599	5.06635	4.72412	5.01641	5.35538	5.09676
NTN1	NM_004822	16831013	1.279	0.005	0.369	1.367	0.002	0.182	1.073	0.211	0.611	chr17	+	8924859	9147317	23	6.26583	6.27245	6.38286	6.35643	6.32005	6.29982	6.67573	6.84604	7.43837	7.44613	7.76844	7.82534
	---	16986995	1.279	0.006	0.383	0.936	0.258	0.713	0.92	0.189	0.589	chr5	+	86042635	86045589	18	3.52123	3.38649	3.33671	3.32878	3.47608	3.49031	3.37134	3.40252	3.41553	3.32188	3.68808	3.75924
RAB44	NM_001257357	17008020	1.279	0.008	0.401	0.979	0.805	0.951	0.844	0.023	0.303	chr6	+	36665628	36683434	16	5.10884	4.98482	4.80146	4.80229	4.79595	5.08502	4.96035	4.86115	4.73698	4.8893	5.18534	5.15139
STOX2	NM_020225	16972824	1.279	0.01	0.403	1.12	0.182	0.661	1.051	0.522	0.822	chr4	+	184774584	184938894	26	6.44945	6.6051	6.70642	6.49211	5.44206	5.58171	5.55659	5.79586	6.55433	6.72014	7.01531	6.96958
TRIM5	NM_033092	16734929	1.279	0.01	0.404	1.048	0.429	0.814	1.469	0	0.058	chr11	-	5684425	5959849	24	6.17175	6.23674	6.74739	6.77113	6.22908	6.2574	6.33691	6.28259	6.05886	5.93165	6.28877	6.41143
ISYNA1	NM_016368	16870401	1.279	0.014	0.422	1.067	0.32	0.754	1.322	0.003	0.163	chr19	-	18545198	18549111	25	10.5324	10.3988	10.9072	10.8305	9.26159	9.13857	9.2573	9.33034	6.09892	6.24628	6.448	6.60765
	---	16778788	1.279	0.035	0.49	0.954	0.554	0.869	1.065	0.311	0.695	chr13	-	46255225	46256554	21	4.1242	4.17774	4.17854	4.30467	4.39812	4.18152	4.30269	4.14165	4.21139	4.12712	4.69028	4.3575
LOC285696	NR_027253	16994672	1.278	0.005	0.369	0.868	0.191	0.666	1.041	0.462	0.791	chr5	-	17130137	17217531	22	4.3645	4.41797	4.46603	4.43204	4.33496	4.74733	4.32493	4.34822	4.39927	4.34649	4.72836	4.72582
	---	17054145	1.278	0.011	0.408	0.99	0.879	0.969	0.804	0.05	0.383	chr7	+	158383260	158383964	21	6.31802	5.99168	5.91001	5.77126	6.27374	6.42365	6.37874	6.28968	6.00862	5.91309	6.39588	6.23382
NKX2-4	ENST00000351817	16917767	1.278	0.066	0.539	1.058	0.472	0.834	0.821	0.055	0.398	chr20	-	21376005	21378666	20	5.51276	5.64061	5.14543	5.4397	5.44705	5.67162	5.70166	5.57843	5.18395	5.5129	5.85748	5.54667
	---	16684898	1.278	0.14	0.621	0.901	0.435	0.816	1.33	0.002	0.134	chr1	-	33802167	33802465	12	5.00889	4.90884	5.36378	5.37621	4.36391	4.8079	4.24817	4.62208	5.60796	5.04023	5.5307	5.82608
WASH3P	NR_003659	16805808	1.278	0.224	0.692	0.934	0.368	0.783	0.889	0.154	0.552	chr15	+	102501016	102516808	8	7.41637	7.41946	7.37556	7.11928	7.60744	7.45437	7.34583	7.52019	6.47379	7.19207	7.39371	6.98089
TUBB6	ENST00000317702	16851081	1.277	0.013	0.42	1.016	0.908	0.976	1.143	0.155	0.553	chr18	+	12308070	12326568	14	9.80207	9.60311	9.77091	10.0209	6.08883	6.6376	6.52526	6.24673	7.13867	6.95193	7.34787	7.44901
LINC00278	NR_046502	17115966	1.277	0.014	0.423	1.314	0.014	0.355	0.841	0.053	0.391	chrY	+	2870953	2970313	9	6.42416	6.19722	6.11337	6.0095	5.63636	5.94822	6.16503	6.2084	5.89526	6.04581	6.40216	6.24485
	---	16772861	1.277	0.016	0.432	1.319	0.022	0.397	0.938	0.307	0.692	chr13	+	19433967	19434882	13	3.30197	3.35397	3.30369	3.16601	3.41841	3.05109	3.68288	3.58411	3.24854	3.3208	3.52816	3.74736
ZNF383	NM_152604	16861510	1.277	0.016	0.44	1.118	0.414	0.806	1.456	0.024	0.306	chr19	+	37717366	37734574	11	6.77332	7.11312	7.26755	7.70219	3.49928	2.9744	3.53604	3.25989	7.77373	7.70519	8.20622	7.97828
	---	16723277	1.277	0.062	0.535	0.894	0.248	0.708	0.977	0.666	0.889	chr11	+	32103310	32103518	17	4.35387	4.33468	4.28578	4.33675	3.99407	4.3365	4.05714	3.95016	4.27946	4.71506	4.8817	4.81981
	---	16731526	1.277	0.063	0.536	1.025	0.663	0.907	1.038	0.564	0.844	chr11	+	115045697	115046044	20	3.21748	3.34586	3.27132	3.40096	3.30442	3.33481	3.32462	3.38705	5.68652	5.426	5.73012	6.08939
	---	16965831	1.277	0.1	0.584	1.19	0.126	0.599	1.127	0.054	0.395	chr4	+	32185971	32194332	9	2.93556	2.97017	3.12898	3.1228	2.89131	3.02928	3.01099	3.41073	2.87445	3.30344	3.2764	3.60656
HMSD	ENST00000408945	16852896	1.277	0.242	0.702	1.067	0.535	0.863	1.149	0.176	0.575	chr18	+	61616535	61636020	18	5.50087	5.38011	5.81413	5.46718	4.47562	4.77262	4.86862	4.56594	6.60768	7.2023	6.94318	7.57231
FLJ11292	BC054879	16997853	1.276	0.005	0.369	1.022	0.787	0.945	0.947	0.522	0.822	chr5	-	86512423	86534822	17	4.63327	4.33899	4.4388	4.37844	4.70633	4.40403	4.58585	4.58928	4.19525	4.20455	4.53219	4.57165
TM7SF3	NM_016551	16762597	1.276	0.005	0.374	1.204	0.014	0.355	1.321	0.002	0.134	chr12	-	27124503	27167367	18	10.4762	10.5339	10.8762	10.9372	11.5492	11.6253	11.853	11.857	10.8744	10.8066	11.1811	11.2035
RABGGTA	NM_004581	16791244	1.276	0.007	0.388	1.553	0	0.087	1.452	0	0.061	chr14	-	24734744	24740945	21	8.02369	7.96509	8.53452	8.52958	8.13644	8.08331	8.65385	8.83585	8.18984	8.23908	8.51009	8.62359
ANO7L1	ENST00000442385	16682144	1.276	0.019	0.453	0.749	0.003	0.222	0.874	0.039	0.355	chr1	-	16542404	16543823	21	6.60836	6.56042	6.40759	6.37295	5.90279	6.02076	5.48081	5.60953	5.19262	4.98038	5.37025	5.50647
FLJ34208	NR_033929	16949780	1.276	0.022	0.46	0.909	0.14	0.618	0.981	0.743	0.919	chr3	+	194207869	194239008	32	5.23237	5.11977	5.18284	5.11369	5.10222	5.20226	5.00449	5.02337	4.94717	4.73419	5.27755	5.10742
EID2B	NM_152361	16872239	1.276	0.112	0.596	1.199	0.039	0.452	1.37	0.005	0.184	chr19	-	40021630	40023494	23	5.7453	5.98233	6.3494	6.28698	5.64223	5.84503	6.06051	5.9511	6.08062	6.5007	6.45003	6.83541
PLA2G16	ENST00000323646	16739752	1.275	0.007	0.383	0.866	0.065	0.512	1.153	0.06	0.409	chr11	-	63340667	63384355	26	5.61579	5.52106	5.70005	5.84601	5.89391	5.72566	5.5638	5.64177	6.40216	6.32988	6.75738	6.67456
	---	16801786	1.275	0.006	0.383	0.986	0.827	0.956	0.97	0.656	0.884	chr15	+	63188011	63191742	21	3.8669	4.0686	3.91787	3.93047	3.92477	3.89248	3.81712	3.96047	3.9119	3.81712	4.22659	4.20311
	---	16956238	1.275	0.006	0.383	0.86	0.039	0.454	0.906	0.245	0.641	chr3	-	72252095	72259043	22	3.81222	4.05956	3.72179	3.86429	4.0902	4.16885	3.86674	3.95717	3.61533	3.71137	4.00518	4.02198
VGLL1	NM_016267	17107309	1.275	0.007	0.392	1.089	0.188	0.664	0.974	0.639	0.876	chrX	+	135614311	135638966	21	4.62893	4.7055	4.66054	4.59795	4.66705	4.77037	4.82013	4.86258	4.7554	4.65827	5.10038	5.01593
MIR4670	NR_039817	17095916	1.275	0.008	0.399	1.018	0.762	0.937	1.003	0.96	0.99	chr9	-	95290266	95290340	20	3.43544	3.23875	3.29384	3.39049	3.38231	3.39738	3.36139	3.47075	3.47826	3.40522	3.73445	3.85071
RRAGD	NM_021244	17021596	1.275	0.008	0.401	1.001	0.987	0.998	1.035	0.559	0.842	chr6	-	90074335	90121995	17	7.885	8.00608	8.00203	7.98757	4.61327	4.48691	4.49695	4.60639	4.51869	4.66187	4.95661	4.92499
MIR211	NR_029624	16806622	1.275	0.009	0.402	1.015	0.866	0.965	0.865	0.077	0.444	chr15	-	31357235	31357344	23	5.37493	5.2315	5.1801	5.00716	5.48306	5.13187	5.31253	5.34646	5.11689	5.26977	5.55333	5.53357
LOC100506012	NM_001205281	16873549	1.275	0.012	0.411	0.914	0.311	0.75	1.072	0.407	0.759	chr19	-	46984045	47104457	16	5.47149	5.43747	5.69888	5.4097	5.54588	5.75502	5.63796	5.40558	5.02481	5.04873	5.48369	5.28985
	---	17046464	1.275	0.012	0.411	1.088	0.22	0.688	0.889	0.361	0.73	chr7	+	64103412	64116285	10	3.61025	3.61166	3.70493	3.17626	3.66565	3.53913	3.67334	3.77529	3.55838	3.40256	3.77238	3.88816
	---	16835580	1.275	0.025	0.465	1.015	0.856	0.963	0.952	0.547	0.836	chr17	+	47438527	47447360	18	4.24034	4.02485	4.15619	3.96785	3.78135	4.04317	3.8576	4.01034	3.71586	4.00786	4.20576	4.21997
PDE10A	NR_045597	17025523	1.275	0.045	0.506	0.714	0.001	0.136	0.845	0.021	0.291	chr6	-	165740776	166075588	22	5.15963	5.24903	4.9832	4.94009	6.92318	6.88195	6.35441	6.47736	4.85746	4.89048	5.03617	5.41224
	---	16736698	1.274	0.007	0.383	1.022	0.754	0.936	1.177	0.072	0.435	chr11	-	21281607	21284116	19	3.28606	3.41346	3.70287	3.46595	3.51746	3.32882	3.41095	3.49852	3.59882	3.59599	3.89182	4.00061
LMNA	NM_170707	16671914	1.274	0.009	0.403	1.221	0.011	0.324	1.241	0.006	0.196	chr1	+	156052364	156109880	29	8.39844	8.3932	8.67959	8.7366	8.71027	8.79115	9.04099	9.0371	7.35674	7.28852	7.73973	7.60285
CXADR	NM_001207066	16921664	1.274	0.049	0.518	0.878	0.176	0.655	1.024	0.814	0.946	chr21	+	18884700	18965897	12	7.02464	7.10166	6.89855	7.29623	7.59394	7.91682	7.62068	7.51618	4.12132	4.02505	4.61102	4.23314
TMEM132C	NM_001136103	16759087	1.273	0.006	0.383	1.199	0.056	0.491	1.012	0.822	0.948	chr12	+	128751948	129192460	22	6.01534	5.97311	6.0164	6.00585	5.95951	6.03017	6.39736	6.11666	5.69304	5.76807	6.04323	6.11381
SDC1	NM_001006946	16894911	1.273	0.006	0.383	1.26	0.005	0.251	1.358	0.003	0.152	chr2	-	20400558	20425194	24	8.42148	8.54981	8.99252	8.86151	8.39941	8.40366	8.75853	8.71087	8.54839	8.45223	8.8655	8.83021
	---	16789124	1.273	0.012	0.411	1.035	0.758	0.937	1.085	0.173	0.573	chr14	+	103561060	103565222	17	5.56554	5.52547	5.62321	5.70306	5.64564	5.16754	5.49625	5.4177	5.49336	5.39826	5.87737	5.71029
	---	16777854	1.273	0.017	0.441	1.176	0.028	0.417	0.975	0.838	0.953	chr13	-	30993656	30996374	22	4.83356	4.29327	4.53076	4.52136	4.58708	4.58794	4.87423	4.76932	4.40414	4.19905	4.70473	4.59393
CFL1P1	NR_028492	16707026	1.273	0.019	0.453	1.1	0.175	0.654	1.307	0.03	0.329	chr10	+	89578070	89605369	16	6.09781	6.28761	6.74684	6.41012	6.42572	6.26222	6.48019	6.48182	6.36182	6.13038	6.55012	6.63881
LCT	NM_002299	16903067	1.273	0.02	0.457	1.116	0.086	0.545	0.839	0.016	0.272	chr2	-	136545410	136594750	32	4.7973	4.83357	4.52339	4.60143	4.51888	4.56135	4.68984	4.707	4.42475	4.37957	4.87504	4.62571
IGLV3-27	ENST00000390304	16927787	1.273	0.03	0.477	1.016	0.845	0.96	1.179	0.088	0.466	chr22	+	23010758	23011276	10	3.97853	4.24067	4.26611	4.42684	3.93181	4.21613	4.14237	4.05184	4.30932	4.20103	4.45678	4.74868
MIR1269A	NR_031673	16967282	1.273	0.067	0.539	0.983	0.858	0.963	1.011	0.928	0.98	chr4	+	67142542	67142646	9	5.65208	5.24658	5.61975	5.31054	5.77659	5.37639	5.53849	5.56356	5.02204	5.44286	5.65591	5.50548
MIR4655	NR_039799	17054530	1.273	0.103	0.588	0.657	0.003	0.2	0.836	0.035	0.342	chr7	-	1883816	1883889	6	5.36086	5.15746	4.97863	5.02236	5.54842	5.38888	4.70241	5.02163	5.45105	5.00665	5.73007	5.42296
CECR9	AF307449	16926847	1.273	0.132	0.614	1.064	0.624	0.895	0.886	0.202	0.602	chr22	+	17809924	17810122	15	5.52523	5.85198	5.54175	5.48691	5.37751	5.35048	5.72799	5.17835	5.00977	5.5789	5.74785	5.53588
HSFY1P1	NR_003607	16926801	1.272	0.006	0.383	1.465	0	0.076	0.885	0.451	0.785	chr22	+	17308364	17310225	8	3.48804	4.01409	3.80302	3.34682	3.05884	3.00364	3.58236	3.5826	3.21637	3.30489	3.59734	3.61827
ADH7	NM_000673	16978261	1.272	0.006	0.383	1.247	0.01	0.316	1.074	0.294	0.682	chr4	-	100333418	100356894	21	3.46921	3.63829	3.62143	3.692	3.63349	3.50753	3.92004	3.85688	3.45456	3.53741	3.81523	3.87114
ERAP2	NM_022350	16987531	1.272	0.014	0.423	1.091	0.251	0.709	1.247	0.29	0.679	chr5	+	96211643	96255420	23	5.38595	4.59029	5.50849	5.10429	8.03698	7.81136	8.05327	8.04755	7.52974	7.3292	7.74944	7.80397
TRAJ11	ENST00000390526	16782100	1.272	0.014	0.427	1.095	0.23	0.695	1.027	0.727	0.913	chr14	+	23001452	23001511	16	4.33886	4.58272	4.45042	4.54822	4.48677	4.47293	4.50204	4.71934	4.36501	4.54889	4.75164	4.85545
SNX32	ENST00000308342	16727085	1.272	0.017	0.443	0.905	0.227	0.694	0.964	0.625	0.871	chr11	+	65601112	65624367	18	4.84199	4.87086	4.9264	4.68143	5.11318	5.0148	5.04435	4.79466	4.69099	4.87172	5.20447	5.0523
	---	16923071	1.272	0.02	0.457	1.08	0.291	0.736	1.077	0.253	0.649	chr21	+	43099341	43117496	15	4.3373	4.19215	4.34455	4.3995	4.61852	4.42728	4.59725	4.67001	4.08263	4.28611	4.60853	4.45449
FAM182A	NR_026713	16912244	1.272	0.024	0.464	1.055	0.394	0.798	1.035	0.842	0.954	chr20	+	26035250	26073683	8	3.75306	3.29057	3.88939	3.25518	3.52527	3.4462	3.60978	3.51588	3.63683	3.36306	3.82128	3.87359
LRP2BP	NM_018409	16982110	1.272	0.023	0.464	1.05	0.656	0.905	1.614	0	0.031	chr4	-	186285032	186317053	22	5.17793	5.17167	5.90286	5.82824	4.7334	4.71023	5.0182	4.56507	4.65139	4.62282	4.8471	5.12138
	---	17127287	1.272	0.031	0.48	1.04	0.495	0.844	0.948	0.372	0.738	---	---	---	---	25	3.86146	3.73823	3.7151	3.72999	3.75822	3.79046	3.84504	3.81625	3.614	3.7239	4.16315	3.86849
TRAJ23	ENST00000390514	16782078	1.272	0.033	0.484	1.096	0.207	0.679	0.978	0.784	0.935	chr14	+	22989394	22989456	16	4.09911	4.29477	4.27169	4.05841	4.07852	4.0065	4.0866	4.26158	4.1997	4.17925	4.37551	4.69799
C20orf144	NM_080825	16912841	1.272	0.039	0.498	1.095	0.177	0.656	0.958	0.666	0.889	chr20	+	32250090	32251721	17	6.54239	6.14532	6.27763	6.28523	6.20382	6.15101	6.24485	6.37163	6.73293	6.63525	7.19858	6.86334
	---	16694613	1.272	0.093	0.575	0.925	0.196	0.669	0.936	0.542	0.832	chr1	-	156471576	156478185	19	4.81518	4.47181	4.68262	4.41343	4.57694	4.53655	4.4499	4.43902	4.41293	4.90053	4.92265	5.08495
LOC100505876	NR_037879	16879131	1.271	0.006	0.383	1.195	0.02	0.387	1.299	0.003	0.151	chr2	+	37423631	37443336	21	9.40744	9.38041	9.81233	9.72904	9.41232	9.31938	9.59124	9.65459	9.09011	9.10327	9.4925	9.39278
ZNF699	ENST00000308650	16868361	1.271	0.013	0.414	1.029	0.724	0.927	1.331	0.011	0.246	chr19	-	9404951	9415795	20	6.98825	7.1163	7.3316	7.59615	5.82975	5.91546	5.77611	6.05177	8.38814	8.20052	8.66732	8.61358
	---	16713377	1.271	0.025	0.464	1.284	0.009	0.314	1.094	0.575	0.848	chr10	-	38736775	38739473	13	6.72738	6.16699	6.37101	6.78215	6.6287	6.48282	6.83793	6.99629	6.29167	6.46972	6.61823	6.8349
	---	16936040	1.271	0.027	0.469	1.129	0.222	0.691	0.865	0.041	0.359	chr22	-	46271879	46283628	15	4.5085	4.40505	4.2141	4.28052	4.21409	4.52332	4.44387	4.64366	3.86504	4.14626	4.39124	4.31251
	---	17058204	1.271	0.037	0.497	0.887	0.069	0.516	0.973	0.677	0.893	chr7	-	65584590	65593711	13	3.32405	3.13882	3.16901	3.21437	3.41063	3.35095	3.19986	3.21637	3.46764	3.13701	3.60676	3.68918
C17orf77	ENST00000392620	16837597	1.27	0.006	0.383	1.111	0.17	0.649	1.023	0.827	0.95	chr17	+	72580818	72590348	17	4.26337	3.91683	3.99646	4.25014	3.98645	4.20116	4.25186	4.23929	4.21253	4.27295	4.55327	4.62202
	---	16993854	1.27	0.017	0.441	0.984	0.865	0.965	1.072	0.495	0.809	chr5	-	1040858	1048427	11	4.19839	4.24489	4.51853	4.12449	3.9327	4.12415	3.85194	4.15974	4.23162	4.02217	4.42594	4.51853
	---	16961758	1.27	0.025	0.465	1.179	0.03	0.427	1.335	0.002	0.139	chr3	-	178244293	178578193	16	4.45825	4.35179	4.79089	4.85309	3.58371	3.56135	3.87545	3.74462	3.45282	3.58083	3.98867	3.73539
	---	16856021	1.27	0.076	0.548	1.006	0.916	0.979	0.97	0.626	0.871	chr18	-	73764462	73768286	22	4.57084	4.42576	4.49134	4.417	4.5323	4.56327	4.61737	4.49671	4.23443	4.22859	4.80939	4.34429
	---	16712601	1.27	0.09	0.571	1.159	0.183	0.661	0.772	0.202	0.603	chr10	-	25682486	25682773	11	4.70565	4.81079	4.80338	3.96591	4.8234	5.22506	5.30588	5.1685	4.65915	4.16433	4.79922	4.71426
	---	16735658	1.27	0.114	0.6	0.964	0.564	0.874	0.967	0.686	0.898	chr11	-	9511189	9514557	15	3.48959	3.2777	3.43889	3.23269	3.1437	3.28317	3.17251	3.14906	3.12476	3.32739	3.30906	3.8331
GALNT10	NM_198321	16991345	1.269	0.005	0.372	1.03	0.621	0.894	1.091	0.137	0.532	chr5	+	153570290	153800544	29	7.95825	7.94906	8.05522	8.10211	7.58458	7.6718	7.68771	7.65309	7.76085	7.7709	8.09142	8.1279
TMEM45B	NM_138788	16733421	1.269	0.006	0.378	1.04	0.626	0.895	1.023	0.692	0.9	chr11	+	129685714	129729898	22	5.55288	5.51871	5.62937	5.50887	8.27469	8.41113	8.27745	8.52124	5.38177	5.42849	5.77425	5.7244
NARR	ENST00000301043	16842786	1.269	0.009	0.403	0.959	0.685	0.915	0.945	0.362	0.731	chr17	-	27041299	27045447	19	5.09739	5.04986	5.05847	4.92628	5.17663	5.24575	5.3564	4.9468	4.78782	4.89117	5.23769	5.12897
	---	16893663	1.269	0.015	0.429	0.758	0.042	0.462	0.975	0.731	0.914	chr2	+	242786532	242787188	19	6.09582	6.27011	6.23615	6.05574	7.10928	6.75945	6.70419	6.36454	7.48667	7.64373	7.83786	7.97964
DUSP6	ENST00000279488	16768297	1.268	0.005	0.374	0.883	0.075	0.528	1.15	0.039	0.354	chr12	-	89741050	89747048	25	8.84037	8.82312	9.07705	8.98945	8.63771	8.67736	8.4203	8.53631	7.62493	7.63384	7.99144	7.95307
CCDC30	ENST00000475614	16663291	1.268	0.005	0.374	0.975	0.667	0.908	1.347	0.001	0.108	chr1	+	42948334	42948667	14	3.30067	3.30783	3.75892	3.71035	3.85592	3.90141	3.81281	3.87258	3.35404	3.35955	3.68269	3.7147
CCNG1	ENST00000340828	16991839	1.268	0.005	0.375	1.476	0	0.071	1.367	0.001	0.112	chr5	+	162864575	162875197	32	10.8796	10.8528	11.2673	11.367	10.8482	10.9067	11.4441	11.4348	10.923	10.9168	11.2352	11.2916
MXD1	NM_002357	16881138	1.268	0.006	0.381	1.186	0.021	0.394	1.897	0	0.05	chr2	+	70142173	70170077	28	6.79704	7.07704	7.93076	7.79062	7.96185	7.87207	8.16713	8.15911	9.10264	9.12353	9.485	9.4245
LOC285548	NR_015450	16974406	1.268	0.007	0.383	1.088	0.292	0.736	0.944	0.354	0.725	chr4	-	13547699	13549448	21	4.72433	4.70326	4.55997	4.70135	4.31284	4.11502	4.25211	4.41942	3.85392	3.95011	4.22827	4.26249
CENPW	ENST00000368328	17012379	1.268	0.023	0.464	0.965	0.554	0.869	1.137	0.057	0.401	chr6	+	126661253	126670021	26	7.54317	7.51464	7.66164	7.76603	7.07813	7.0675	7.07546	6.9669	8.35887	8.09454	8.54573	8.59301
TMEM100	NM_001099640	16846887	1.268	0.026	0.469	0.996	0.95	0.989	1.006	0.923	0.978	chr17	-	53796988	53809482	21	3.21199	3.38304	3.27242	3.34063	3.4744	3.31986	3.40712	3.37565	3.35074	3.1429	3.68772	3.49107
CLN8	NM_018941	17065158	1.268	0.027	0.469	1.395	0.001	0.115	1.748	0	0.024	chr8	+	1703944	1734738	24	6.66413	6.74043	7.54981	7.46597	6.00917	6.06322	6.51689	6.51599	5.91106	5.63463	6.15768	6.07351
	---	16917682	1.268	0.037	0.496	0.972	0.711	0.923	0.806	0.035	0.343	chr20	-	20194943	20195906	23	4.10763	3.80907	3.65674	3.63828	4.00055	3.9831	4.08029	3.82112	3.88021	4.1668	4.28067	4.45329
	---	16781101	1.268	0.042	0.502	1.097	0.186	0.663	1.015	0.865	0.962	chr13	-	112760409	112761196	22	5.70331	5.94961	5.75247	5.94181	5.86108	5.74032	5.99253	5.87661	5.61661	5.66739	5.80882	6.1615
TUBA1A	NM_001270399	16764305	1.268	0.112	0.596	1.02	0.875	0.968	1.082	0.431	0.774	chr12	-	49578579	49583107	11	5.55855	5.92076	5.78278	5.92532	6.3857	6.49971	6.20489	6.73651	6.04749	5.82239	6.02553	6.52911
LOC100289396	XR_109529	16861890	1.268	0.2	0.671	1.246	0.167	0.646	1.244	0.1	0.482	chr19	+	39308059	39322636	26	7.60662	7.30661	7.57966	7.96265	8.01568	7.39832	8.14994	7.89831	8.28497	8.09023	8.17007	8.88892
	---	16812503	1.267	0.007	0.383	0.874	0.226	0.694	1.237	0.067	0.425	chr15	-	82466565	82466726	9	4.80019	4.97608	5.37054	5.01888	5.31324	5.01343	4.81243	5.12658	4.97854	4.98767	5.27688	5.37039
ZNF468	NM_199132	16875101	1.267	0.01	0.403	1.145	0.298	0.74	1.2	0.014	0.26	chr19	-	53341785	53360902	14	8.95602	8.99388	9.19825	9.2775	4.10327	4.17929	4.60507	4.06667	9.50683	9.36401	9.7949	9.75705
CSDA	NM_003651	16761423	1.267	0.017	0.443	1.521	0.001	0.143	1.849	0.001	0.09	chr12	-	10851676	10875953	18	7.23798	7.43784	8.39858	8.05067	6.64987	6.84259	7.25573	7.44709	7.5373	7.59406	7.79682	8.01704
	---	16796929	1.267	0.019	0.453	1.271	0.096	0.562	1.071	0.509	0.815	chr14	-	103039845	103041292	14	5.40315	5.00536	5.35837	5.24903	5.29017	5.08919	5.80025	5.2713	5.11774	5.14325	5.58976	5.35339
BRMS1L	ENST00000216807	16783420	1.267	0.028	0.475	1.262	0.005	0.259	1.363	0.005	0.19	chr14	+	36295524	36401531	25	6.61329	6.55753	6.91131	7.1532	6.91382	6.99238	7.29018	7.28818	6.99767	6.87403	7.1439	7.40899
TMEM59L	NM_012109	16859840	1.267	0.031	0.481	1.07	0.314	0.751	0.973	0.619	0.869	chr19	+	18723682	18731849	18	7.24182	7.17453	7.14646	7.1914	6.5989	6.51771	6.72882	6.58449	5.94697	6.16798	6.506	6.29105
STAT2	NM_005419	16766093	1.266	0.005	0.374	1.11	0.116	0.59	1.309	0.002	0.142	chr12	-	56735381	56754037	26	7.40865	7.41887	7.84362	7.76158	8.2203	8.21893	8.31613	8.42438	7.97632	7.98194	8.30676	8.3319
PPM1A	NM_177952	16784909	1.266	0.005	0.375	1.275	0.005	0.258	1.515	0	0.065	chr14	+	60712470	60765805	34	7.25694	7.20396	7.7596	7.89857	7.77541	7.76441	8.17757	8.06396	7.42618	7.38908	7.75616	7.73843
PRIC285	NM_001037335	16921289	1.266	0.006	0.383	1.055	0.619	0.894	1.074	0.237	0.634	chr20	-	62189439	62205592	20	5.90256	5.94385	6.07888	5.97426	5.72682	5.93232	6.10497	5.7085	5.96937	5.91167	6.3017	6.26022
NUDT14	AK128196	16789621	1.266	0.016	0.433	1.283	0.058	0.495	0.928	0.24	0.636	chr14	+	105639541	105640155	20	4.19912	4.1177	4.10915	3.991	4.58841	4.1314	4.79109	4.64849	3.91637	4.10972	4.3082	4.39884
LOC100129484	AK125308	17054803	1.266	0.029	0.476	1.52	0	0.058	1.234	0.01	0.239	chr7	-	5465916	5468558	22	6.8588	6.74308	7.13381	7.07317	6.50224	6.55815	7.1042	7.16324	5.90044	6.18812	6.35615	6.41196
RN5S505	ENST00000364748	17103991	1.266	0.035	0.491	1.258	0.02	0.387	0.948	0.504	0.813	chrX	+	53935488	53935595	8	3.67963	3.41258	3.44131	3.49778	3.27128	3.28853	3.47875	3.74287	3.29466	3.35167	3.5048	3.82204
PVT1	AK128687	17072718	1.266	0.067	0.539	1.347	0.02	0.386	1.376	0.086	0.462	chr8	+	128938355	128943402	21	5.61165	5.13039	5.56889	6.09585	5.72887	5.43222	5.86891	6.15146	5.92782	6.15564	6.56477	6.19846
	---	17110127	1.266	0.099	0.584	1.07	0.448	0.822	0.961	0.655	0.884	chrX	-	39085356	39159040	15	4.72776	4.4296	4.59784	4.44477	4.43363	4.6812	4.7635	4.54651	4.35652	4.78589	4.76724	5.05587
ATF3	NM_001040619	16677278	1.266	0.148	0.63	1.292	0.086	0.545	1.667	0.001	0.088	chr1	+	212738676	212794119	17	6.31604	6.42759	6.96968	7.24873	4.90868	5.44857	5.65812	5.43863	6.2595	6.66488	7.04271	6.56258
POU3F3	ENST00000361360	16883853	1.265	0.031	0.481	0.964	0.524	0.858	1.028	0.664	0.888	chr2	+	105471969	105476929	21	4.85469	4.70143	4.85092	4.78433	4.97292	4.93811	4.92252	4.88308	4.58425	4.88475	5.10168	5.04626
LOC400657	NR_024484	16855988	1.265	0.033	0.487	1.031	0.585	0.882	1.067	0.341	0.716	chr18	-	72259010	72265071	23	5.89393	6.02297	5.98238	6.12245	5.84098	5.84275	5.89169	5.88056	5.81945	5.83692	6.01052	6.3248
	---	16969367	1.265	0.043	0.504	0.963	0.511	0.851	1.033	0.697	0.901	chr4	+	104845697	104845798	15	3.54305	3.80687	3.64637	3.79736	3.53536	3.55032	3.48795	3.49047	3.32779	3.61597	3.70803	3.91471
LOC339788	NR_015405	16894174	1.264	0.007	0.392	1.063	0.372	0.785	0.948	0.458	0.789	chr2	-	8062556	8418214	17	4.44974	4.29561	4.21287	4.3776	4.4775	4.50024	4.48824	4.66629	4.2467	4.16265	4.56963	4.51567
	---	16705800	1.264	0.02	0.457	0.987	0.823	0.954	1.116	0.113	0.501	chr10	+	72689682	72691814	21	5.30934	5.23245	5.49755	5.36084	5.17249	5.1403	5.18308	5.09174	5.09312	5.17798	5.58546	5.36083
ZG16B	NM_145252	16815246	1.264	0.034	0.489	1.101	0.307	0.746	0.835	0.116	0.505	chr16	+	2880170	2882285	21	5.18587	5.26652	5.16745	4.76425	5.27257	4.9274	5.21016	5.26811	4.92616	5.2295	5.46119	5.37099
	---	16674348	1.264	0.047	0.513	0.973	0.781	0.943	0.833	0.056	0.4	chr1	+	179070798	179074885	23	4.49003	4.50257	4.08827	4.37557	4.57494	4.3196	4.56216	4.25299	5.31011	5.23902	5.43394	5.79201
	---	17127419	1.264	0.056	0.528	0.901	0.183	0.662	1.101	0.103	0.485	---	---	---	---	25	3.50316	3.4669	3.61695	3.63135	3.69157	3.46985	3.40501	3.45696	3.44043	3.43938	3.5805	3.97562
	---	16793610	1.264	0.103	0.587	1.064	0.43	0.814	0.835	0.024	0.306	chr14	-	61108286	61109382	21	5.97358	6.08707	5.82828	5.71025	5.81082	5.60133	5.87328	5.71801	5.44328	5.52124	6.07862	5.56244
	---	17043228	1.263	0.007	0.39	1.064	0.591	0.883	0.959	0.729	0.913	chr7	+	5219692	5219793	8	3.91884	4.26404	4.21673	3.84556	3.79716	3.93611	3.72357	4.18711	3.78119	3.76922	4.16052	4.06488
	---	16784564	1.263	0.009	0.402	1.161	0.05	0.478	1.081	0.206	0.606	chr14	+	57265363	57266023	18	3.49462	3.58828	3.69018	3.61826	3.59013	3.72043	3.82624	3.91445	3.48643	3.52261	3.77795	3.90552
NRIP2	NM_031474	16760031	1.263	0.011	0.408	1.042	0.655	0.905	1	0.996	0.999	chr12	-	2934514	2944710	26	5.74404	5.65373	5.70906	5.68959	5.59227	5.91598	5.89604	5.7322	5.57504	5.69238	6.02456	5.91657
CDC42BPG	ENST00000342711	16740094	1.263	0.024	0.464	1.273	0.006	0.272	1.263	0.005	0.191	chr11	-	64590859	64612041	28	7.4485	7.55129	7.83802	7.83578	7.82788	7.70307	8.09154	8.1364	7.06169	6.96626	7.22913	7.47345
C16orf95	ENST00000562840	16829002	1.263	0.026	0.469	0.986	0.896	0.973	1.274	0.075	0.441	chr16	-	87172049	87188136	16	5.59767	6.00477	6.2845	6.01636	6.49183	6.19653	6.15922	6.48912	5.84361	5.80463	6.0244	6.29846
	---	17077279	1.263	0.027	0.47	0.969	0.644	0.901	0.987	0.869	0.963	chr8	-	56429799	56433536	15	3.73161	3.56868	3.752	3.50977	3.59598	3.74488	3.57067	3.68001	3.50229	3.75862	3.90826	4.02611
CABP5	NM_019855	16873818	1.263	0.033	0.486	1.023	0.862	0.964	0.727	0.016	0.267	chr19	-	48532640	48547311	13	4.25742	4.58808	4.06498	3.86342	4.89913	4.3328	4.58209	4.71555	4.23397	4.08225	4.62961	4.3597
RGPD3	NM_001144013	16901456	1.263	0.034	0.487	1.311	0.021	0.391	1.204	0.085	0.46	chr2	-	107007564	107084832	9	2.52475	2.65891	3.02899	2.69079	2.42382	2.51018	2.68243	3.03451	2.53741	2.83317	3.07077	2.97355
ESPNP	NR_026567	16682278	1.263	0.037	0.496	1.225	0.023	0.4	1.087	0.177	0.576	chr1	-	17017713	17046652	9	6.25971	6.17625	6.37897	6.29928	5.41747	5.46138	5.62764	5.83727	5.27665	5.59926	5.79703	5.7529
	---	16924469	1.263	0.074	0.547	0.879	0.108	0.579	0.991	0.865	0.962	chr21	-	25261114	25262857	23	3.63025	3.63631	3.61843	3.62287	3.72365	3.62637	3.58898	3.38984	3.60152	3.61841	3.72453	4.16913
CSTT	NR_001279	16912094	1.262	0.01	0.404	0.986	0.831	0.957	0.959	0.534	0.828	chr20	+	23499783	23522655	25	4.09849	3.96569	3.89344	4.04787	4.08209	3.9221	3.97663	3.98789	3.96552	3.95817	4.22209	4.37354
	---	17085520	1.262	0.02	0.457	1.146	0.18	0.658	1.237	0.016	0.268	chr9	+	69252845	69254032	11	5.0097	4.85824	5.29933	5.18355	4.44776	4.74046	4.90801	4.67437	4.91286	5.05361	5.22504	5.41299
	---	17069471	1.262	0.031	0.479	1.05	0.456	0.827	0.889	0.107	0.491	chr8	+	65716461	65730447	19	3.90765	3.98316	3.693	3.85779	3.61685	3.76853	3.76394	3.76113	3.91348	3.76786	4.04748	4.30531
	---	16793714	1.262	0.031	0.481	0.906	0.199	0.672	0.948	0.529	0.826	chr14	-	63764844	63766265	21	3.82608	3.77373	3.57383	3.87266	3.95329	4.05161	3.75837	3.96042	3.93417	3.90646	4.40495	4.1076
LOC151657	AK091114	16957089	1.262	0.036	0.492	1.077	0.259	0.714	0.893	0.095	0.477	chr3	-	107732834	107758725	24	4.75297	4.65826	4.48914	4.59374	4.71891	4.58165	4.74169	4.77347	4.41949	4.58431	4.97474	4.70079
LOC441728	AK302879	16803231	1.262	0.13	0.612	1.137	0.134	0.61	0.724	0.003	0.151	chr15	+	76067894	76079321	8	4.79214	4.67368	4.34937	4.1838	4.47405	4.33713	4.47566	4.70641	4.20347	4.73545	4.91847	4.69174
ZBTB7B	NM_001252406	16671545	1.261	0.006	0.383	1.258	0.008	0.304	1.357	0.002	0.12	chr1	+	154975106	154991001	23	7.61894	7.53012	7.98547	8.04356	7.83869	7.71839	8.0692	8.14902	7.44693	7.45741	7.81531	7.75906
CST7	NM_003650	16912130	1.261	0.006	0.383	0.953	0.428	0.813	0.84	0.021	0.293	chr20	+	24929866	24940564	22	5.38489	5.34332	5.05241	5.17129	5.71751	5.66234	5.57234	5.6672	4.97293	4.99004	5.33968	5.29272
ERO1LB	NM_019891	16700911	1.261	0.007	0.383	1.053	0.41	0.804	1.355	0.006	0.198	chr1	-	236378422	236445339	27	6.2571	6.41056	6.6726	6.87106	7.37273	7.41089	7.41086	7.52016	8.14895	8.10296	8.49067	8.42827
	---	16767906	1.261	0.007	0.392	0.82	0.087	0.547	1.037	0.712	0.907	chr12	-	79734985	79897176	16	3.55669	3.42269	3.35733	3.72769	4.04351	3.62677	3.51161	3.58461	3.56842	3.47604	3.87459	3.84051
	---	16920096	1.261	0.008	0.401	1.091	0.391	0.796	1.233	0.009	0.223	chr20	-	47656924	47662581	22	5.58219	5.55988	5.92373	5.82173	5.37773	5.61662	5.78073	5.46377	5.5762	5.66098	5.99594	5.91054
SFTPA1	NM_005411	16706522	1.261	0.009	0.403	0.951	0.394	0.798	1.254	0.015	0.263	chr10	+	81370695	81375199	10	3.05144	2.85106	3.24547	3.30833	3.28358	3.36196	3.23982	3.25924	3.2331	3.26689	3.51832	3.64934
FBXO48	NM_001024680	16898548	1.261	0.01	0.403	0.989	0.852	0.961	1.151	0.036	0.346	chr2	-	68689486	68694390	15	6.97939	7.05312	7.22351	7.214	6.82749	6.75479	6.75672	6.79448	7.92798	8.05886	8.30437	8.35002
LOC257396	AK097893	16984725	1.261	0.01	0.403	1.183	0.023	0.402	1.276	0.006	0.201	chr5	+	52405672	52410956	24	7.78154	7.76238	8.04841	8.19931	7.32749	7.23791	7.54595	7.50604	7.82191	7.74597	8.0592	8.17651
	---	16980497	1.261	0.012	0.411	0.933	0.358	0.777	0.979	0.678	0.894	chr4	-	149948597	149983674	23	4.1336	4.0996	4.09491	4.07558	4.35578	4.21789	4.27992	4.09394	4.01534	4.16356	4.38009	4.46979
CORO1B	NM_020441	16741000	1.261	0.012	0.411	1.075	0.3	0.741	1.156	0.042	0.363	chr11	-	67205518	67211292	22	6.96337	7.08635	7.22027	7.24804	7.11534	7.29037	7.33115	7.28321	6.97026	7.02893	7.25378	7.41291
PLCL2	NM_015184	16938182	1.261	0.016	0.433	1.225	0.018	0.378	1.137	0.048	0.38	chr3	+	16844159	17132098	32	6.80368	6.73842	6.97188	6.94037	7.05691	6.90032	7.224	7.3185	6.82958	7.02476	7.29738	7.22746
C1orf191	ENST00000361350	16664963	1.261	0.019	0.453	1.063	0.322	0.756	0.77	0.005	0.191	chr1	+	54703710	54704736	17	6.10437	5.95045	5.61272	5.68557	5.94426	5.93713	6.0806	5.97747	5.56681	5.77175	6.05565	5.95154
ABCC3	NM_003786	16836021	1.261	0.02	0.457	0.965	0.741	0.932	0.941	0.324	0.704	chr17	+	48712138	48769063	35	6.88653	6.82609	6.70958	6.82824	8.03331	7.91185	7.70604	8.13683	5.26103	5.03011	5.4949	5.46411
CDK5R2	NM_003936	16891116	1.261	0.036	0.492	1.032	0.707	0.922	0.872	0.085	0.461	chr2	+	219824377	219826877	16	6.84109	6.64407	6.50466	6.58662	6.57645	6.70975	6.82408	6.55259	6.31194	6.62664	6.78293	6.82633
LOC146880	NR_027487	16847863	1.261	0.041	0.5	0.854	0.053	0.483	1.295	0.021	0.292	chr17	-	62745780	62778117	8	5.96628	6.21435	6.56451	6.36247	6.50915	6.31809	6.21678	6.15683	6.64012	6.30958	6.77351	6.84696
D21S2088E	NR_040254	16924461	1.261	0.06	0.531	0.982	0.763	0.938	1.063	0.301	0.686	chr21	-	24733426	24757182	17	3.29334	3.19214	3.35156	3.31079	3.46076	3.35137	3.35949	3.4001	3.09881	3.25901	3.32938	3.69726
	---	16740698	1.261	0.085	0.565	0.921	0.197	0.67	1.014	0.804	0.942	chr11	-	66035106	66035600	24	6.15826	6.05592	6.13037	6.12394	6.01117	5.90854	5.84995	5.83258	5.66663	6.10323	6.13044	6.30844
	---	16834764	1.261	0.172	0.653	1.108	0.585	0.882	1.081	0.477	0.8	chr17	+	42396996	42397584	17	8.77481	8.44358	8.57616	8.86823	8.52561	7.72372	8.43954	8.10512	8.68275	8.5863	8.63837	9.30047
CHMP1B	NM_020412	16851022	1.26	0.007	0.383	1.031	0.597	0.885	1.254	0.01	0.238	chr18	+	11851389	11854448	20	9.5949	9.55852	9.82027	9.98789	10.2989	10.2816	10.37	10.299	10.348	10.3325	10.7089	10.6373
	---	16760145	1.26	0.008	0.401	0.972	0.662	0.907	0.88	0.077	0.444	chr12	-	4361901	4384231	19	6.96496	6.81093	6.67903	6.72848	7.10765	7.14142	7.00603	7.16152	7.13337	7.02913	7.43853	7.38932
SLC35D1	NM_015139	16688269	1.26	0.018	0.444	1.114	0.118	0.591	1.432	0.002	0.127	chr1	-	67465015	67520080	31	6.72176	6.7308	7.14046	7.34724	7.46168	7.59503	7.66611	7.70259	7.60501	7.4613	7.78528	7.94692
LOC145845	NR_024264	16807125	1.26	0.02	0.457	0.971	0.724	0.927	0.941	0.388	0.747	chr15	-	37156644	37179236	23	3.69604	3.87155	3.6433	3.75005	3.71532	3.88828	3.88709	3.63073	3.62118	3.84698	4.09882	4.0345
	---	17015381	1.26	0.036	0.492	1.287	0.011	0.331	0.95	0.353	0.724	chr6	-	6758511	6759524	18	5.37417	5.42901	5.33991	5.31583	5.17035	5.34818	5.70284	5.54343	5.17275	5.37944	5.49102	5.72764
FAM27D1	XR_132873	17085392	1.26	0.062	0.534	1.014	0.89	0.971	0.99	0.852	0.957	chr9	+	46389110	46424817	10	4.56468	4.56217	4.54976	4.54949	4.69737	4.32994	4.62527	4.44217	4.68053	4.3039	4.75188	4.89763
	---	16885144	1.26	0.073	0.546	1.246	0.017	0.369	1.026	0.794	0.938	chr2	+	121343387	121362263	17	5.15823	5.05197	5.32606	4.95719	4.82189	4.83244	5.03599	5.25272	4.63032	5.0097	5.04561	5.26055
	---	16832133	1.259	0.007	0.383	1.025	0.737	0.931	1.004	0.958	0.99	chr17	+	19483256	19499371	16	5.67124	5.78664	5.85116	5.61827	5.75251	5.75561	5.67991	5.89728	5.73893	5.68883	6.0669	6.02469
EPHA2	NM_004431	16682098	1.259	0.008	0.399	1.322	0.002	0.179	1.731	0	0.035	chr1	-	16450832	16482582	26	9.5846	9.72091	10.3866	10.5036	9.63782	9.56767	9.9902	10.0215	10.4116	10.3053	10.6913	10.6905
	---	16731567	1.259	0.01	0.403	0.918	0.247	0.708	0.964	0.501	0.812	chr11	+	116510139	116528969	23	4.29104	4.21781	4.20196	4.20049	4.18025	4.38468	4.18515	4.13141	4.02475	4.1603	4.42632	4.42256
RRM1-AS1	ENST00000529323	16734755	1.259	0.01	0.403	1.042	0.489	0.841	0.896	0.235	0.632	chr11	-	4158346	4159487	22	5.36654	5.0429	5.05694	5.03634	5.10215	5.16125	5.15509	5.22762	5.2588	5.39511	5.65379	5.66434
	---	16678278	1.259	0.015	0.429	1.143	0.061	0.502	1.56	0.004	0.181	chr1	+	227976988	227979782	22	4.84943	5.04647	5.77296	5.40713	4.85736	4.8195	4.97131	5.09081	5.15226	5.07511	5.35582	5.53525
	---	17045753	1.259	0.019	0.453	1.024	0.768	0.939	0.853	0.08	0.45	chr7	+	44887843	44889231	23	5.58284	5.50221	5.18302	5.44476	5.5314	5.49619	5.41056	5.68434	5.44139	5.27137	5.7626	5.61343
FLJ41733	AK123727	17117916	1.259	0.033	0.486	0.999	0.978	0.996	0.957	0.52	0.821	chr21	+	44783212	44786446	12	5.90079	5.71921	5.69806	5.79411	5.78788	5.80938	5.7641	5.82855	5.56582	5.81996	5.94388	6.10664
FAM101B	NM_182705	16839220	1.259	0.036	0.494	1.138	0.073	0.523	0.925	0.201	0.602	chr17	-	289769	295731	22	10.0282	9.96151	9.83488	9.92815	6.04369	6.18599	6.28594	6.31865	5.81826	5.82472	6.31064	5.99587
CBS	NM_001178008	16926111	1.258	0.011	0.408	1.269	0.008	0.304	0.943	0.459	0.79	chr21	-	44473301	44497053	29	5.1011	5.34865	5.09562	5.18687	4.96412	4.8766	5.19195	5.33741	4.91458	5.0358	5.35316	5.25987
C3orf15	NM_033364	16944432	1.258	0.011	0.408	1.054	0.53	0.861	0.946	0.462	0.791	chr3	+	119421869	119485949	26	4.6445	4.41797	4.50103	4.40079	4.2612	4.50451	4.37019	4.54754	4.17847	4.03496	4.45755	4.41716
	---	17010345	1.258	0.013	0.414	1.082	0.462	0.83	0.894	0.213	0.612	chr6	+	74233341	74280319	20	4.32298	4.01644	4.02861	3.98642	4.17011	3.96666	4.37541	3.98888	3.93515	3.84873	4.14875	4.29811
TMEM35	ENST00000372930	17105393	1.258	0.014	0.422	1.08	0.33	0.762	1.047	0.529	0.826	chrX	+	100333709	100351356	23	4.25535	4.02566	4.19835	4.21434	4.24565	4.02592	4.18365	4.30953	4.19481	4.21246	4.44481	4.62526
	---	16787228	1.258	0.029	0.477	1.027	0.643	0.901	1.068	0.263	0.657	chr14	+	88556389	88557999	16	2.92919	3.02218	3.05834	3.08268	3.04716	3.07447	3.07359	3.12446	3.00234	2.99757	3.18932	3.47288
	---	16711674	1.258	0.03	0.479	0.935	0.284	0.731	0.953	0.574	0.848	chr10	-	9800746	9801200	23	5.01809	4.72031	4.74446	4.85399	4.86352	4.96916	4.83064	4.80853	4.709	4.92203	5.24338	5.04948
	---	17024359	1.258	0.031	0.48	1.103	0.132	0.608	0.971	0.569	0.845	chr6	-	143415171	143420782	21	4.36885	4.39349	4.32112	4.3543	4.34818	4.43727	4.51906	4.54767	4.16562	4.27848	4.68665	4.41954
SPDYE8P	NR_003664	17058394	1.258	0.041	0.5	1.296	0.007	0.292	0.92	0.299	0.685	chr7	-	72490260	72500309	12	6.69636	6.43179	6.46154	6.42435	6.51699	6.46669	6.76808	6.96401	6.50089	6.23861	6.59971	6.80241
	---	16767981	1.258	0.042	0.501	1.1	0.338	0.767	1.075	0.208	0.608	chr12	-	80737295	80737572	11	5.68867	5.66045	5.80583	5.75085	5.27095	5.56872	5.43813	5.67497	5.70699	5.7716	5.90639	6.23484
DLGAP3	ENST00000373347	16685012	1.258	0.051	0.52	1.068	0.263	0.717	0.744	0.029	0.325	chr1	-	35331037	35395186	21	5.80472	5.73832	5.56032	5.13088	5.5687	5.55122	5.67423	5.63659	5.06283	5.39161	5.64111	5.47492
	---	17009129	1.258	0.077	0.551	0.936	0.405	0.802	0.949	0.348	0.72	chr6	+	44041650	44045689	26	3.93144	3.85227	3.82132	3.80968	4.24575	4.157	4.23079	3.98043	4.00774	3.94489	4.52655	4.08773
RN7SL1	NR_002715	16783970	1.258	0.095	0.577	1.055	0.445	0.82	0.908	0.267	0.66	chr14	+	50320358	50329571	10	10.2855	9.99285	10.0311	9.96859	10.1226	10.2879	10.2284	10.3368	9.7251	10.1694	10.1762	10.3796
LOC100505502	AK094743	16713048	1.258	0.17	0.651	0.862	0.054	0.488	0.954	0.688	0.898	chr10	-	31650356	31652937	8	4.32761	4.06271	4.33465	3.91872	4.16456	4.33201	4.04616	4.02339	3.86487	4.09846	4.61894	4.00624
	---	16971441	1.258	0.339	0.762	0.906	0.425	0.812	1.115	0.568	0.845	chr4	+	152221670	152221765	9	4.12672	3.99736	3.80245	4.63582	4.34765	4.03536	4.26068	3.83732	3.97873	5.00065	4.76464	4.87709
LINC00221	AK058096	16789807	1.257	0.007	0.383	1.039	0.53	0.86	0.965	0.628	0.873	chr14	+	106842205	106977000	29	4.94884	4.88079	4.74738	4.97929	4.84477	4.9183	4.97367	4.8988	4.74051	4.72166	5.09073	5.03113
AHNAK2	NM_138420	16797196	1.257	0.015	0.431	1.07	0.541	0.864	1.39	0.001	0.097	chr14	-	105403581	105444694	25	6.97127	6.96529	7.48984	7.39617	9.43038	9.05556	9.47327	9.20751	5.73096	5.63452	6.09817	5.92824
	---	16697840	1.257	0.019	0.453	1.025	0.754	0.936	1.029	0.737	0.916	chr1	-	201084904	201096312	18	6.14183	5.87914	5.96753	6.13556	5.80463	6.07567	6.0111	5.94133	5.62927	5.84836	6.08774	6.04925
	---	16665960	1.257	0.045	0.506	0.943	0.499	0.846	1.084	0.357	0.727	chr1	+	68944812	68949222	23	7.85367	7.9832	7.8917	8.17977	5.43572	5.12735	5.16987	5.22521	6.16453	5.91162	6.25111	6.48473
	---	17078019	1.257	0.066	0.539	1.027	0.704	0.92	0.999	0.989	0.997	chr8	-	70234191	70238992	10	4.53358	4.45933	4.56866	4.42178	4.96199	4.78072	4.97164	4.84953	4.17786	4.57788	4.65925	4.75641
TRBV6-7	ENST00000390373	17063787	1.257	0.168	0.649	1.012	0.878	0.969	0.79	0.037	0.35	chr7	-	142143652	142144084	11	4.20977	4.40836	3.82314	4.11417	4.10448	3.95271	4.15005	3.94104	3.93183	3.36977	3.8189	4.14254
FLCN	NM_144997	16841858	1.256	0.006	0.383	1.089	0.165	0.644	1.061	0.314	0.698	chr17	-	17115526	17140502	25	6.88013	6.98494	7.01655	7.01905	7.69461	7.69382	7.79137	7.84298	7.40597	7.38355	7.74039	7.70652
APLP1	NM_001024807	16861282	1.256	0.007	0.383	1.161	0.047	0.474	1.185	0.015	0.263	chr19	+	36359138	36370699	29	8.57743	8.59185	8.82498	8.83473	8.03152	8.0594	8.33248	8.1886	9.67269	9.64217	9.96299	10.01
TRIM72	NM_001008274	16818231	1.256	0.008	0.399	1.257	0.086	0.545	0.934	0.412	0.761	chr16	+	31225342	31236510	19	8.03594	8.21034	7.90899	8.14043	5.62273	6.12182	6.24606	6.15948	5.89843	5.97514	6.24286	6.28935
	---	16942266	1.256	0.014	0.423	1.035	0.57	0.876	1.043	0.544	0.833	chr3	+	61284244	61299032	21	5.00448	4.84697	4.91676	5.05647	5.19862	5.07856	5.17834	5.19966	4.71071	4.87319	5.08309	5.15823
ASB9P1	NR_033769	16805216	1.256	0.06	0.531	0.946	0.421	0.81	0.932	0.401	0.755	chr15	+	93338714	93340338	9	4.14658	4.41116	4.2423	4.11173	4.21965	4.25188	4.24665	4.06517	4.14729	4.11107	4.65324	4.26249
LOC100131662	AK127156	16900238	1.256	0.094	0.576	1.125	0.08	0.536	1.052	0.431	0.774	chr2	-	95690938	95692454	25	5.1541	4.98551	5.15183	5.13474	4.89928	4.87485	5.10219	5.01131	4.91503	5.00439	5.5266	5.05101
	---	16775758	1.256	0.102	0.587	1.308	0.015	0.359	0.821	0.07	0.43	chr13	+	90203039	90204606	8	4.50873	4.83946	4.31379	4.46349	4.4541	4.30304	4.90065	4.62988	4.34493	3.9259	4.60412	4.32498
IGHV3-16	ENST00000390604	16797483	1.255	0.009	0.403	1.071	0.433	0.816	0.953	0.508	0.815	chr14	-	106621894	106622419	13	3.10801	3.05634	3.1273	2.89675	3.11021	3.02593	3.31966	3.01398	3.18533	3.25353	3.4969	3.59748
	---	16675378	1.255	0.015	0.429	0.927	0.324	0.758	1.11	0.323	0.704	chr1	+	193273875	193335083	21	5.50568	5.28492	5.37472	5.7187	4.37467	4.15815	4.0985	4.21335	4.0469	4.22307	4.4939	4.43208
	---	16906524	1.255	0.017	0.444	1.135	0.151	0.628	1.078	0.245	0.641	chr2	-	191417990	191418206	16	3.94159	3.80097	3.95195	4.00779	4.18645	3.91007	4.19007	4.27214	3.81704	3.95631	4.29294	4.13717
OR56A5	NM_001146033	16734965	1.255	0.023	0.463	1.003	0.953	0.989	1.009	0.932	0.981	chr11	-	5988783	5989724	13	3.90025	3.70948	3.9994	3.63542	3.57743	3.66754	3.6325	3.62237	3.59622	3.83526	4.01751	4.07052
PHOSPHO1	NM_001143804	16846389	1.255	0.027	0.47	1.098	0.204	0.676	1.111	0.218	0.616	chr17	-	47300724	47308128	21	6.33	6.14051	6.49341	6.28143	6.05727	6.17924	6.17486	6.33082	5.73277	5.9979	6.17493	6.21251
	---	17025174	1.255	0.033	0.486	0.863	0.064	0.51	0.91	0.192	0.592	chr6	-	158818917	158819593	21	4.2719	4.2056	4.19649	4.00889	4.32164	4.12965	3.99811	4.03009	4.07998	4.31182	4.43174	4.61693
ZNF658	BC031626	17094194	1.255	0.068	0.539	1.32	0.034	0.438	1.202	0.08	0.449	chr9	-	40760700	40836415	9	3.02418	2.7849	3.04461	3.29376	3.3985	2.95205	3.5989	3.55177	2.99027	3.14016	3.20015	3.58675
	---	16700624	1.255	0.089	0.569	1.11	0.142	0.619	0.929	0.317	0.699	chr1	-	234404329	234408246	18	3.35975	3.58252	3.37362	3.35619	3.09338	3.25472	3.34507	3.30526	3.11216	3.20412	3.71538	3.25674
ACOT11	NM_147161	16664978	1.255	0.197	0.669	0.988	0.844	0.96	1.005	0.931	0.98	chr1	+	55007930	55104865	21	7.8986	7.86138	7.93416	7.83983	8.55514	8.51402	8.56836	8.46682	5.92817	6.06768	5.98059	6.67177
PHPT1	NM_001135861	17091397	1.254	0.006	0.383	1.403	0.001	0.11	1.286	0.003	0.153	chr9	+	139743176	139745490	20	8.9078	8.90264	9.30252	9.23369	8.95745	9.01586	9.47782	9.47354	9.27091	9.2913	9.61871	9.59824
FRMD8	NM_031904	16726860	1.254	0.007	0.392	1.358	0.009	0.312	0.989	0.888	0.968	chr11	+	65154041	65180996	15	6.7698	6.62049	6.56033	6.79774	7.8008	7.49868	8.03587	8.147	6.50476	6.52218	6.80514	6.87435
ZNF746	ENST00000340622	17064185	1.254	0.008	0.401	1.146	0.075	0.528	1.131	0.052	0.39	chr7	-	149169884	149194908	19	7.48311	7.48039	7.68892	7.63102	7.8401	7.70988	7.90807	8.03482	7.9586	7.90693	8.21714	8.30196
PNPLA8	NM_015723	17061807	1.254	0.009	0.403	0.988	0.846	0.96	1.13	0.171	0.571	chr7	-	108110866	108168605	32	7.90959	8.12244	8.08959	8.29536	8.99949	9.02127	9.0424	8.94517	8.23405	8.13834	8.47563	8.55143
	---	16779509	1.254	0.011	0.408	0.915	0.22	0.689	1.017	0.761	0.925	chr13	-	53720674	53725943	19	3.39247	3.39769	3.36715	3.4725	3.67521	3.69545	3.65359	3.46039	3.46897	3.57031	3.89692	3.79547
	---	16676931	1.254	0.011	0.408	0.941	0.383	0.791	1.202	0.024	0.306	chr1	+	208901290	208910106	16	3.36468	3.34603	3.70566	3.53561	3.27271	3.45593	3.3056	3.24683	3.40684	3.38033	3.64782	3.79034
RN5S211	ENST00000365516	17011334	1.254	0.014	0.423	1.106	0.142	0.619	1.02	0.863	0.961	chr6	+	106897256	106897372	13	4.05329	4.0102	3.82961	4.28961	4.11626	4.08964	4.31579	4.17965	4.01731	4.06158	4.28197	4.44897
DIO3OS	NR_002770	16796791	1.254	0.016	0.433	1.242	0.008	0.305	1.075	0.364	0.732	chr14	-	102018558	102022013	19	4.83829	4.72296	5.00552	4.76475	4.78846	4.72051	5.02476	5.10974	4.70566	4.71769	4.94197	5.13558
	---	16986246	1.254	0.019	0.453	0.922	0.383	0.791	1.042	0.48	0.801	chr5	+	74244127	74271554	25	4.2295	4.18735	4.21449	4.32084	4.20902	4.13229	3.88234	4.22423	3.77616	3.94094	4.11516	4.25621
	---	16742812	1.254	0.022	0.462	0.866	0.207	0.679	0.919	0.232	0.628	chr11	-	82674723	82750157	23	3.5182	3.35678	3.36841	3.26343	3.82711	3.3799	3.37518	3.41492	3.36215	3.30208	3.77335	3.54366
	---	17084545	1.254	0.026	0.469	1.081	0.341	0.768	1.485	0	0.065	chr9	+	34665662	34681295	16	6.70932	6.82259	7.31484	7.35749	4.61347	4.8137	4.73097	4.92175	5.09036	4.82763	5.29085	5.28208
	---	17016483	1.254	0.03	0.477	1.044	0.489	0.841	0.815	0.054	0.396	chr6	-	27634762	27635927	21	5.6143	5.27925	5.12323	5.17771	5.21802	5.23073	5.22341	5.34993	5.03746	5.30166	5.45438	5.53721
MIR191	NR_029690	16953811	1.254	0.033	0.484	0.988	0.904	0.975	0.806	0.013	0.255	chr3	-	49058051	49058142	8	6.33859	6.32329	6.10749	5.93209	6.49116	6.05147	6.28471	6.22115	5.95748	5.75124	6.28477	6.07824
LOC253039	NR_024408	17088579	1.254	0.033	0.485	1.067	0.285	0.732	1.344	0.023	0.3	chr9	+	123605320	123616651	19	6.24661	6.13064	6.42402	6.80454	6.66499	6.61126	6.70783	6.75376	6.7741	6.52485	7.05084	6.90072
	---	16724263	1.254	0.04	0.498	1.027	0.744	0.933	0.957	0.572	0.847	chr11	+	46193498	46198656	19	5.88875	5.87963	5.9534	5.68814	6.02592	5.81437	6.07124	5.84798	5.88508	6.12579	6.22606	6.43846
	---	16838382	1.254	0.047	0.512	1.169	0.118	0.591	1.037	0.624	0.871	chr17	+	76311810	76343879	20	4.36397	4.40239	4.31159	4.56139	4.00891	4.19286	4.17956	4.47193	4.08412	4.08001	4.23609	4.58272
	---	17068924	1.254	0.119	0.604	1.094	0.295	0.738	1.018	0.742	0.918	chr8	+	53207015	53214502	21	4.99969	5.03208	5.08729	4.99724	5.28963	5.10666	5.21227	5.44224	4.5626	5.07856	5.22269	5.07274
	---	17054110	1.254	0.238	0.7	1.197	0.214	0.684	0.964	0.679	0.894	chr7	+	157258925	157292410	20	4.05843	4.03516	4.15926	3.829	4.15131	4.51876	4.35294	4.83627	4.10437	3.91341	4.71592	3.95429
	---	17092790	1.254	0.274	0.727	0.984	0.877	0.969	0.898	0.193	0.593	chr9	-	20683303	20684687	23	4.81588	5.0746	4.76623	4.81366	5.15108	4.85113	5.1403	4.8145	4.94074	5.50911	5.87737	5.22594
P4HA2	ENST00000401867	16999712	1.253	0.006	0.383	1.16	0.041	0.457	1.131	0.055	0.397	chr5	-	131527531	131631008	35	8.15188	8.21622	8.36299	8.35869	8.68433	8.79659	8.96772	8.94122	8.27746	8.29372	8.61829	8.60334
OPRD1	NM_000911	16661676	1.253	0.007	0.392	1.016	0.807	0.951	0.872	0.075	0.442	chr1	+	29138654	29190208	17	5.34821	5.20943	5.14818	5.01551	5.07677	5.07516	5.17652	5.0206	4.93782	4.98358	5.25804	5.31321
C8A	NM_000562	16665193	1.253	0.01	0.404	1.105	0.121	0.595	0.865	0.075	0.441	chr1	+	57320443	57383894	21	4.39068	4.18764	4.03305	4.12488	4.16467	4.08641	4.25232	4.28731	3.87389	3.9626	4.19525	4.29087
	---	16845652	1.253	0.012	0.409	1.2	0.046	0.472	1.075	0.264	0.658	chr17	-	42384668	42392683	18	5.45918	5.31956	5.46158	5.52536	4.87097	4.63366	5.07002	4.96083	4.67536	4.82223	5.06595	5.08229
TBC1D2	NM_001267571	17096471	1.253	0.013	0.414	1.117	0.103	0.572	1.12	0.079	0.448	chr9	-	100961280	101018003	29	8.07173	8.04781	8.27213	8.17501	8.35998	8.254	8.49632	8.43845	8.42458	8.277	8.70797	8.64296
PAPPA2	ENST00000367662	16674151	1.253	0.024	0.464	0.988	0.831	0.957	1.138	0.196	0.597	chr1	+	176432307	176814735	23	4.82007	4.93217	4.89196	5.23474	4.91845	4.95081	4.96489	4.86791	4.66147	4.85245	5.00237	5.16231
	---	16764498	1.253	0.025	0.465	0.987	0.843	0.96	1.026	0.705	0.904	chr12	-	50348422	50349908	22	6.12622	6.20497	6.29678	6.10838	5.78015	5.91978	5.88727	5.77479	5.8711	6.12421	6.33127	6.3147
	---	16986888	1.253	0.025	0.466	1.08	0.25	0.709	1.026	0.711	0.906	chr5	+	82026363	82026823	20	4.26673	4.30105	4.42368	4.21735	4.19834	4.20286	4.23674	4.38689	4.0858	4.31886	4.57604	4.47788
	---	16711272	1.253	0.032	0.481	1.045	0.495	0.844	1.026	0.622	0.87	chr10	-	3574286	3579223	20	4.16209	4.15568	4.202	4.18974	4.03808	4.13766	4.21207	4.09189	4.02389	4.24219	4.36664	4.54967
ERVMER34-1	ENST00000443173	16975947	1.253	0.063	0.536	1.134	0.066	0.512	0.908	0.139	0.534	chr4	-	53588785	53617807	25	9.3222	9.29365	9.2329	9.10552	4.80433	4.85618	5.05496	4.96879	4.54719	4.85205	5.14973	4.89887
	---	16969994	1.252	0.008	0.399	1.072	0.249	0.708	0.941	0.41	0.761	chr4	+	114864412	114865476	19	3.86413	4.05274	3.79953	3.9408	3.83942	3.77731	3.89949	3.91774	3.99329	3.96071	4.33971	4.26218
NPPA	NM_006172	16681799	1.252	0.013	0.414	1.111	0.145	0.624	0.918	0.244	0.64	chr1	-	11905766	11908402	20	5.11916	4.92665	4.8549	4.94485	4.89824	4.95507	5.16024	4.99611	4.99687	4.93858	5.21694	5.36601
PLTP	ENST00000477313	16919703	1.252	0.023	0.464	1.053	0.368	0.783	0.959	0.451	0.785	chr20	-	44527259	44541003	28	7.02532	7.02508	6.92007	7.00836	5.98992	5.99769	6.05422	6.08319	7.06929	7.27131	7.43028	7.55794
BMP7	NM_001719	16920585	1.252	0.048	0.516	1.12	0.271	0.723	0.938	0.434	0.775	chr20	-	55743804	55841707	25	6.81853	6.69151	6.78792	6.53873	8.36923	8.31289	8.69979	8.30895	5.81592	6.08399	6.16486	6.38245
GALNTL2	ENST00000339732	16938133	1.252	0.085	0.565	1.016	0.88	0.97	1.096	0.141	0.537	chr3	+	16216156	16273499	19	4.52423	4.52765	4.71039	4.6055	4.7708	4.37023	4.69037	4.49688	4.36944	4.67683	4.68141	5.01201
	---	16712863	1.252	0.088	0.569	0.959	0.517	0.854	0.897	0.082	0.455	chr10	-	28731504	28731825	18	3.98198	3.90245	3.7824	3.78786	3.87605	3.97198	3.79828	3.92721	3.65221	3.87227	4.28854	3.88418
MSX2P1	NR_002307	16836412	1.252	0.209	0.681	1.103	0.144	0.622	1.35	0.019	0.286	chr17	+	56234320	56236481	9	3.91691	4.04943	4.23458	4.5981	4.42562	4.51103	4.56329	4.65604	4.15872	4.64631	4.46097	4.99285
FAM83H	ENST00000388913	17082250	1.251	0.01	0.403	1.139	0.062	0.507	1.27	0.004	0.169	chr8	-	144806103	144815971	21	9.94751	9.89563	10.2456	10.2878	10.1086	10.0052	10.224	10.2649	9.73969	9.78663	10.0314	10.1417
	---	16787185	1.251	0.014	0.424	1.056	0.503	0.848	0.97	0.76	0.925	chr14	+	87613822	87614350	18	3.91081	3.80202	3.62332	4.00201	3.85959	3.61182	3.87867	3.74917	3.96124	3.79002	4.2078	4.19007
TNFRSF13C	NM_052945	16935512	1.251	0.018	0.449	1.139	0.126	0.6	0.831	0.048	0.379	chr22	-	42321036	42322822	16	6.44686	6.27918	5.9913	6.20109	6.75156	6.83746	6.85806	7.10783	5.99169	6.1716	6.4541	6.35582
C1orf53	ENST00000367393	16675533	1.251	0.036	0.492	0.737	0.002	0.166	1.209	0.031	0.331	chr1	+	197871682	197876497	22	6.99763	7.0883	7.21697	7.41723	9.23359	9.13903	8.71481	8.77782	6.68388	6.38401	6.85679	6.85745
COL4A2-AS1	NR_046583	16780993	1.251	0.146	0.629	1.03	0.649	0.903	1.054	0.444	0.781	chr13	-	111154922	111160526	16	3.97884	3.7794	3.96854	3.94168	4.0733	4.09745	4.20624	4.04933	3.86764	4.17908	4.09721	4.59467
MUC19	HM801842	16750109	1.251	0.195	0.668	1.091	0.156	0.635	1.004	0.952	0.988	chr12	+	40914381	40935425	22	4.05691	4.19702	4.03518	4.23142	3.98703	4.00148	4.14859	4.09278	4.16336	4.09385	4.10912	4.79509
	---	16998441	1.251	0.274	0.727	1.255	0.095	0.559	1.062	0.309	0.693	chr5	-	96511654	96511817	9	3.72816	3.66166	3.8272	3.73719	3.26013	3.73191	3.70802	3.94018	4.05937	3.40332	4.32763	3.78075
FOSL1	NM_005438	16740630	1.25	0.008	0.399	1.339	0.003	0.214	1.221	0.015	0.266	chr11	-	65659490	65668044	18	9.49961	9.38859	9.78553	9.67812	9.13042	9.24455	9.54496	9.67275	9.66415	9.6621	9.94788	10.023
	---	16935951	1.25	0.008	0.399	0.954	0.471	0.833	0.978	0.696	0.901	chr22	-	45396446	45399500	23	4.93338	5.00581	4.97365	4.9022	4.9719	5.10001	5.01687	4.9181	4.94109	4.98535	5.25843	5.31106
CNTD1	NM_173478	16834476	1.25	0.008	0.401	1.104	0.425	0.812	0.835	0.037	0.348	chr17	+	40950854	40963605	26	4.35667	4.20858	4.10364	3.93899	4.17879	4.69286	4.63734	4.51996	4.09321	4.05159	4.43437	4.35497
	---	16729023	1.25	0.009	0.403	0.984	0.804	0.95	1.181	0.084	0.457	chr11	+	74396269	74396550	9	2.63648	2.91628	3.07638	2.95595	2.81492	2.68994	2.66402	2.79327	2.72528	2.62126	3.01484	2.97557
	---	16783165	1.25	0.009	0.403	1.023	0.774	0.941	1.213	0.106	0.491	chr14	+	31717834	31771945	19	3.71059	3.51841	4.08656	3.70081	3.7285	3.73019	3.90254	3.62211	3.5597	3.61606	3.95837	3.86182
MT1E	NM_175617	16819217	1.25	0.013	0.42	1.158	0.197	0.669	1.404	0.001	0.103	chr16	+	56659387	56661024	13	7.81259	7.70625	8.28777	8.21076	6.79786	7.22082	7.15328	7.29021	7.45911	7.41119	7.835	7.67939
NTM-IT2	ENST00000446631	16733594	1.25	0.018	0.446	1.103	0.227	0.694	1.103	0.295	0.682	chr11	+	131850990	131854555	22	4.16537	3.82784	4.11902	4.15721	4.1669	4.0986	4.15075	4.39708	4.07151	4.01428	4.26912	4.46144
	---	17091069	1.25	0.023	0.464	1.1	0.181	0.66	0.94	0.584	0.852	chr9	+	138054581	138057152	24	4.17509	4.30057	4.37074	3.92619	4.32686	4.26875	4.35253	4.51775	4.0795	4.31124	4.49179	4.54277
ST6GALNAC2	NM_006456	16849274	1.25	0.033	0.486	0.82	0.013	0.347	1.037	0.678	0.894	chr17	-	74561461	74582145	27	8.26479	7.95314	8.10359	8.22051	6.95339	6.91499	6.59252	6.70335	5.52551	5.3135	5.83817	5.64552
LINC00501	AK055528	16948158	1.25	0.041	0.5	0.913	0.306	0.746	0.986	0.786	0.935	chr3	+	177012230	177041206	22	3.63072	3.63812	3.65095	3.57569	3.80189	3.49837	3.47199	3.56535	3.3269	3.29864	3.79268	3.47619
	---	16894091	1.25	0.11	0.594	0.971	0.786	0.945	1.022	0.835	0.952	chr2	-	6766241	6775067	19	3.59556	3.45532	3.76617	3.34931	3.67906	3.54889	3.34464	3.79634	3.3218	3.81914	3.93895	3.84586
	---	17100766	1.25	0.154	0.636	1.075	0.457	0.827	0.643	0.002	0.129	chrUn	+	30381	68053	10	5.66014	5.87792	5.24347	5.01806	5.53143	5.33299	5.69719	5.3755	5.1494	4.56922	5.26126	5.10102
MRI1	NM_001031727	16858849	1.249	0.007	0.386	1.302	0.006	0.271	1.073	0.209	0.609	chr19	+	13875337	13885096	26	8.70357	8.75032	8.82261	8.83599	8.56603	8.64771	8.904	9.07235	9.94029	9.9562	10.2846	10.2531
PEX12	NM_000286	16843462	1.249	0.008	0.4	1.058	0.41	0.804	1.188	0.029	0.325	chr17	-	33897849	33905656	26	8.33359	8.48843	8.63528	8.68349	8.73147	8.86959	8.82363	8.94025	7.98921	8.0662	8.35989	8.33761
CALY	NM_015722	16719868	1.249	0.008	0.401	1.055	0.451	0.824	0.82	0.01	0.232	chr10	-	135138927	135150475	20	6.47181	6.38963	6.14928	6.13975	6.08597	6.274	6.28995	6.22307	6.21918	6.17839	6.55975	6.48041
HIST1H2AH	ENST00000359193	17005787	1.249	0.016	0.438	0.89	0.171	0.651	1.425	0.007	0.211	chr6	+	27100817	27103070	11	6.82313	7.00774	7.27897	7.5741	8.45881	8.30964	8.10213	8.33042	8.14511	8.25411	8.44434	8.59786
IP6K3	NM_001142883	17018299	1.249	0.026	0.469	0.973	0.65	0.903	0.801	0.021	0.293	chr6	-	33689443	33714762	20	5.44883	5.2262	4.96403	5.07058	5.30451	5.20982	5.19703	5.23894	4.89227	5.13814	5.36274	5.30888
	---	16746577	1.249	0.031	0.481	1.097	0.179	0.657	1	0.999	1	chr12	+	740057	772872	27	5.03715	5.14514	5.30065	4.88204	5.54788	5.48144	5.71547	5.57979	6.18502	5.95545	6.46726	6.31446
HCN2	NM_001194	16856216	1.249	0.033	0.484	1.022	0.846	0.961	1.137	0.354	0.724	chr19	+	589893	617159	16	6.03611	6.50035	6.28748	6.61804	6.45741	6.61768	6.79686	6.34143	5.61384	5.36403	5.87488	5.74447
IDUA	NM_000203	16963845	1.249	0.033	0.485	1.229	0.014	0.356	1.229	0.021	0.294	chr4	+	980785	998317	17	7.0386	7.0121	7.42716	7.21723	8.05244	8.07825	8.28492	8.44082	6.625	6.77293	7.14043	6.89921
	---	16695010	1.249	0.049	0.518	0.959	0.47	0.833	1.015	0.824	0.949	chr1	-	158096904	158098261	19	3.27167	3.05997	3.19518	3.18046	3.22025	3.17401	3.13956	3.135	3.20728	2.9686	3.2853	3.53346
RN5S291	ENST00000517222	17096702	1.249	0.059	0.531	0.99	0.885	0.97	0.961	0.476	0.799	chr9	-	106451755	106451859	17	3.10911	3.01319	3.00881	2.99705	3.11444	3.07339	3.1611	2.99951	2.97065	2.96951	3.10303	3.4798
OR2T12	NM_001004692	16701606	1.249	0.066	0.539	1.069	0.507	0.85	0.803	0.117	0.507	chr1	-	248457918	248458880	9	6.63623	6.41373	5.96948	6.44841	5.63071	5.98502	5.81195	5.99518	6.17684	5.78866	6.26229	6.34504
ECH1	BC014786	16861887	1.249	0.117	0.603	1.11	0.387	0.794	1.128	0.25	0.646	chr19	+	39306064	39306567	22	7.89948	7.64845	7.79679	8.09948	8.53335	8.10367	8.59751	8.33888	8.87008	8.59822	8.8328	9.27806
RNU6-78	NR_046944	16773426	1.249	0.145	0.628	0.923	0.465	0.831	0.851	0.096	0.478	chr13	+	26091257	26091363	9	3.63862	3.32608	3.26388	3.23633	3.50484	3.13547	3.0797	3.33112	3.13961	3.21794	3.21193	3.78764
	---	17052540	1.249	0.182	0.659	0.882	0.117	0.591	1.068	0.234	0.631	chr7	+	141859087	141859143	12	3.51244	3.49072	3.60848	3.58463	3.41392	3.40437	3.11665	3.34062	3.85086	3.26073	4.02361	3.73068
	---	17011034	1.248	0.008	0.399	0.963	0.697	0.919	0.969	0.736	0.916	chr6	+	92829240	92829349	8	3.49489	3.35859	3.54552	3.21859	3.52379	3.29082	3.20277	3.50429	3.35447	3.35209	3.63658	3.70941
	---	17088541	1.248	0.008	0.399	1.158	0.179	0.658	1.087	0.298	0.684	chr9	+	120540295	120546694	20	3.91741	4.0499	4.21596	3.99128	3.91277	3.57981	3.833	4.08373	3.83348	3.83027	4.18633	4.11651
REV3L	ENST00000358835	17022623	1.248	0.008	0.401	1.346	0.007	0.296	1.457	0.001	0.076	chr6	-	111620234	111804918	35	8.71307	8.72916	9.20535	9.32325	9.3632	9.0827	9.64802	9.65514	8.94805	8.8925	9.27126	9.20983
ASRGL1	NM_001083926	16739244	1.248	0.011	0.408	1.094	0.23	0.696	1.001	0.987	0.996	chr11	-	62104383	62105562	17	6.02321	5.71081	5.85293	5.88506	5.70665	5.67275	5.92389	5.71415	5.73572	5.72508	6.11606	5.98376
MESP2	NM_001039958	16804687	1.248	0.012	0.411	0.986	0.846	0.96	0.978	0.739	0.917	chr15	+	90303822	90321985	15	6.61886	6.55907	6.65062	6.46314	6.58654	6.80454	6.65101	6.69986	6.08887	5.9689	6.38683	6.31071
	---	16848055	1.248	0.015	0.429	0.992	0.924	0.981	0.83	0.021	0.291	chr17	-	65760074	65761939	18	6.00589	5.8579	5.6903	5.63605	5.61565	5.75517	5.55959	5.78979	5.37839	5.44995	5.65575	5.81276
	---	16961646	1.248	0.021	0.457	1.037	0.549	0.867	1.247	0.06	0.408	chr3	-	172489067	172489195	16	3.87051	3.8633	3.9891	4.38011	3.98369	4.07316	4.04264	4.1203	3.97037	4.07093	4.24425	4.43668
	---	16703110	1.248	0.022	0.46	1.02	0.819	0.954	0.932	0.413	0.763	chr10	+	22222072	22222367	14	4.9846	4.68294	4.72794	4.73847	4.74315	4.93955	4.99563	4.74361	5.07664	4.99941	5.25318	5.46379
SPRR2A	ENST00000392653	16693357	1.248	0.03	0.478	1.221	0.159	0.639	0.852	0.024	0.306	chr1	-	153028589	153030013	9	6.17737	6.2655	6.00003	5.98141	5.93365	6.43847	6.33299	6.61469	5.94918	5.99958	6.42631	6.16224
C2orf66	NM_213608	16906830	1.248	0.095	0.577	1.554	0.001	0.161	1.31	0.018	0.282	chr2	-	197669139	197675000	23	4.55088	4.23143	4.81157	4.7499	4.73024	4.67198	5.17976	5.49351	4.12862	4.48074	4.46939	4.77943
LOC388820	BC049386	16925321	1.248	0.122	0.607	0.967	0.559	0.871	1.087	0.304	0.688	chr21	-	35786792	35796264	21	4.20095	4.14573	4.4232	4.16278	4.30755	4.334	4.27365	4.27272	3.84936	4.35757	4.49518	4.35082
	---	17084828	1.248	0.161	0.643	1.044	0.557	0.871	0.794	0.034	0.338	chr9	+	35913871	35914639	10	5.38481	5.34107	5.19169	4.86799	5.04974	5.21004	5.27073	5.11258	4.93512	5.46974	5.67155	5.37341
	---	16711262	1.247	0.008	0.401	1.035	0.619	0.894	0.74	0.05	0.384	chr10	-	3507669	3545058	26	3.86447	4.16807	3.8073	3.35776	3.70069	3.85339	3.8864	3.76636	3.66344	3.73811	4.00259	4.0372
SASH1	NM_015278	17013520	1.247	0.011	0.408	1.001	0.988	0.998	1.153	0.058	0.403	chr6	+	148593440	148873186	28	7.43166	7.59927	7.70572	7.73706	8.40631	8.14226	8.29203	8.25978	7.71138	7.76734	7.99788	8.11619
	---	16936219	1.247	0.012	0.413	1.015	0.807	0.951	0.986	0.839	0.953	chr22	-	50006305	50009364	23	6.21788	6.44243	6.34262	6.27556	6.11887	6.02299	6.0751	6.10864	5.82706	5.94295	6.15818	6.25072
	---	16658726	1.247	0.015	0.429	1.022	0.753	0.936	1.032	0.547	0.835	chr1	+	9908376	9910212	22	5.27479	5.32535	5.34861	5.34425	5.69867	5.68663	5.61886	5.83046	5.10257	4.92915	5.32752	5.34265
	---	17048751	1.247	0.016	0.434	1.105	0.19	0.665	0.937	0.237	0.634	chr7	+	98297763	98300444	25	5.2992	5.28313	5.2017	5.1932	5.22861	5.13831	5.42503	5.22975	5.30606	5.13429	5.56434	5.51132
	---	17052049	1.247	0.016	0.44	0.92	0.325	0.758	1.17	0.027	0.317	chr7	+	135777673	136122174	20	4.66827	4.64461	4.9294	4.83532	5.10526	4.83154	4.80069	4.8966	4.7526	4.58009	4.95397	5.01399
PPAPDC2	NM_203453	17083277	1.247	0.017	0.443	1.044	0.524	0.857	1.247	0.007	0.212	chr9	+	4662298	4665258	24	7.55824	7.44965	7.83898	7.8067	8.58179	8.45616	8.64319	8.51846	8.39632	8.2302	8.67438	8.58729
	---	17066112	1.247	0.018	0.447	1.088	0.203	0.675	1.084	0.217	0.616	chr8	+	17763265	17773919	17	3.53002	3.68366	3.70851	3.73983	3.51575	3.47685	3.68417	3.55298	3.4418	3.62547	3.82027	3.88349
	---	17113565	1.247	0.019	0.453	0.947	0.659	0.906	1.116	0.168	0.567	chrX	-	118374282	118378429	21	7.93223	7.75265	7.9222	8.07824	7.99655	7.49411	7.76571	7.56679	7.91922	7.85995	8.11128	8.3035
	---	16836863	1.247	0.02	0.457	1.053	0.437	0.817	0.996	0.939	0.983	chr17	+	60980515	60982300	15	3.63516	3.63156	3.66063	3.59426	3.54733	3.70368	3.69384	3.70432	3.42593	3.53035	3.88715	3.70432
	---	16926194	1.247	0.021	0.46	1.025	0.683	0.914	0.949	0.474	0.799	chr21	-	44808523	44809763	15	3.79019	3.56477	3.61552	3.5901	3.59035	3.66293	3.61328	3.71199	3.35313	3.41407	3.80865	3.59728
ZNF483	NM_133464	17088067	1.247	0.022	0.46	0.979	0.771	0.94	1.064	0.395	0.751	chr9	+	114287439	114340124	17	5.81094	5.82441	5.79387	6.02125	5.16135	5.35477	5.18422	5.27259	6.0962	6.1932	6.56521	6.36274
PRNT	NR_024267	16916894	1.247	0.022	0.46	1.084	0.207	0.679	1.053	0.362	0.731	chr20	-	4711928	4721314	23	3.97108	4.04657	4.11239	4.056	4.15246	4.2584	4.32313	4.31939	4.13387	4.03244	4.49927	4.30293
DMBT1	NM_007329	16710138	1.247	0.024	0.464	0.925	0.193	0.667	0.818	0.016	0.268	chr10	+	124320181	124403252	20	5.11617	5.18743	4.93418	4.79064	4.9793	4.96531	4.84165	4.87698	4.82071	4.92365	5.08539	5.2971
HCLS1	ENST00000314583	16957986	1.247	0.032	0.481	0.922	0.332	0.764	1.034	0.612	0.866	chr3	-	121350246	121379791	18	4.27147	4.09489	4.25919	4.20329	4.42147	4.315	4.11833	4.38415	3.94197	4.05781	4.19401	4.44317
MIR4677	NR_039824	16679480	1.247	0.039	0.498	0.949	0.432	0.815	1.198	0.253	0.649	chr1	+	243509478	243509557	20	5.47441	5.37812	5.3646	6.00992	5.36678	5.19766	5.20267	5.21004	4.50408	4.38763	4.62314	4.90488
FNDC4	NM_022823	16895941	1.247	0.045	0.507	0.997	0.974	0.995	1.105	0.132	0.526	chr2	-	27714750	27718126	21	7.30188	7.3542	7.53671	7.4072	5.96715	6.26212	5.99321	6.22703	8.51709	8.22904	8.76978	8.61408
TXNDC8	NM_001003936	17097060	1.247	0.068	0.539	0.979	0.791	0.946	1.005	0.938	0.983	chr9	-	113065801	113100127	16	3.52963	3.45368	3.42972	3.56745	3.41442	3.62751	3.57114	3.41128	3.31295	3.24693	3.40218	3.79588
	---	17127185	1.247	0.07	0.543	0.946	0.483	0.838	0.846	0.072	0.434	---	---	---	---	20	6.42224	6.19705	6.15299	5.9843	6.06166	6.27559	6.16715	6.01021	6.0608	5.94517	6.51673	6.1281
SERPINE2	ENST00000409840	16909021	1.247	0.09	0.571	0.933	0.248	0.708	1.151	0.063	0.415	chr2	-	224839765	224904036	35	7.62376	7.72441	7.80438	7.94993	6.53045	6.56086	6.46995	6.42155	5.48869	5.32724	5.93953	5.51469
	---	16758046	1.247	0.178	0.656	1.166	0.137	0.615	1.181	0.24	0.636	chr12	+	121544846	121544977	8	4.86467	4.61609	4.72332	5.23818	4.51657	4.88114	4.88915	4.94969	4.14718	4.5671	4.43257	4.91883
	---	16796257	1.247	0.19	0.664	1.193	0.024	0.407	0.97	0.723	0.912	chr14	-	94830651	94839076	19	5.14183	5.02701	5.18793	4.89351	5.12242	5.16337	5.4627	5.33191	4.67439	5.33044	5.26465	5.37556
SSX6	NR_028366	17103243	1.247	0.191	0.665	0.878	0.171	0.65	0.86	0.026	0.315	chrX	+	47967365	47980073	8	4.19174	4.21492	4.01087	3.96238	4.45582	4.21791	4.03207	4.26585	3.83309	4.18976	4.6119	4.04703
MAGEA3	ENST00000393902	17115070	1.247	0.228	0.694	1.438	0.005	0.251	0.636	0.003	0.16	chrX	-	151934652	151938240	8	7.51611	7.7361	7.13457	6.81415	5.87774	5.58706	6.17072	6.34282	6.14021	5.81221	5.96086	6.62657
RNF144B	NM_182757	17005197	1.246	0.007	0.392	1.034	0.603	0.888	1.428	0.011	0.244	chr6	+	18368779	18469105	20	6.74268	7.08713	7.32373	7.53434	6.83861	6.7451	6.78099	6.89867	7.05479	7.05685	7.35472	7.39154
MYRIP	ENST00000302541	16939439	1.246	0.008	0.399	1.067	0.288	0.734	0.787	0.015	0.265	chr3	+	39850405	40301812	17	5.86534	5.99682	5.68759	5.48356	5.96641	5.9045	6.06161	5.99682	5.55058	5.60731	5.90811	5.88382
SRA1	NR_045587	17000746	1.246	0.01	0.404	1.295	0.005	0.249	1.475	0.001	0.102	chr5	-	139929652	139937895	22	8.74923	8.85354	9.44691	9.27766	8.42782	8.55923	8.83784	8.89495	9.13983	9.03293	9.38673	9.42035
PTPRT	NM_133170	16919351	1.246	0.02	0.457	0.973	0.648	0.903	0.904	0.194	0.595	chr20	-	40701392	41818610	24	4.48713	4.5462	4.4843	4.25801	4.65336	4.70031	4.59741	4.67838	4.31985	4.52027	4.76082	4.71403
	---	16929193	1.246	0.023	0.464	1.027	0.625	0.895	1.067	0.435	0.776	chr22	+	31688485	31734007	17	4.68727	4.51392	4.81199	4.57681	5.04458	5.04344	5.08622	5.08079	4.57871	4.50577	4.75139	4.96746
NTM-IT3	ENST00000421651	16733597	1.246	0.051	0.519	1.129	0.069	0.515	0.819	0.077	0.444	chr11	+	132154196	132154975	13	6.08445	5.71707	5.55996	5.66647	5.7003	5.62484	5.82924	5.84631	5.64707	5.98122	6.09253	6.17006
OR4D1	ENST00000268912	16836409	1.246	0.105	0.59	1.138	0.08	0.535	1.238	0.155	0.553	chr17	+	56232494	56233517	9	2.81875	3.39435	3.47763	3.35161	3.05091	3.03918	3.31349	3.1507	3.12796	3.53628	3.51661	3.7816
SKAP1	NM_003726	16846195	1.246	0.174	0.653	0.967	0.566	0.874	0.992	0.9	0.972	chr17	-	46210802	46507594	29	6.82908	7.02825	6.90664	6.9265	8.87835	8.9021	8.79354	8.88822	4.14338	4.63094	4.504	4.90347
CCDC71L	NM_175884	17061582	1.245	0.007	0.394	1.02	0.835	0.958	1.17	0.059	0.405	chr7	-	106297211	106301634	16	7.01494	6.99808	7.12332	7.34197	7.65601	7.81156	7.93007	7.5937	7.21061	7.17199	7.49789	7.51746
ANG	NM_001145	16781573	1.245	0.009	0.403	1.069	0.485	0.839	1.03	0.583	0.852	chr14	+	21152259	21168761	20	6.66677	6.7036	6.75944	6.69691	7.77451	7.47863	7.61153	7.83403	6.93005	6.86183	7.18283	7.24025
	---	16882651	1.245	0.014	0.423	1.061	0.43	0.814	1.121	0.089	0.468	chr2	+	88838238	88875128	15	4.11113	4.23235	4.31123	4.36267	4.22302	3.98554	4.1993	4.18136	4.26598	4.12687	4.47614	4.549
ERVK13-1	NR_040023	16823165	1.245	0.014	0.427	1.181	0.054	0.488	1.024	0.657	0.885	chr16	-	2708390	2723440	15	6.4464	6.49599	6.49097	6.51953	7.1109	7.34666	7.46832	7.4698	7.14073	7.26729	7.56892	7.47018
FLJ25758	NR_024372	16867899	1.245	0.02	0.457	0.908	0.274	0.725	1.047	0.438	0.778	chr19	-	7004964	7006426	12	3.38002	3.26133	3.37672	3.39665	3.82297	3.52248	3.57645	3.48849	3.19562	3.17698	3.6061	3.39801
	---	16732739	1.245	0.023	0.462	0.97	0.652	0.904	0.992	0.889	0.968	chr11	+	123059510	123098985	20	3.23592	3.29573	3.25634	3.254	3.33855	3.20445	3.16492	3.29051	3.16979	3.36747	3.53173	3.63771
	---	16792308	1.245	0.024	0.464	0.902	0.16	0.639	0.986	0.91	0.975	chr14	-	44464984	44853748	18	3.88972	3.88994	3.61503	4.12526	3.95361	4.03403	3.75824	3.93082	3.99643	3.86225	4.15099	4.34002
	---	16876601	1.245	0.116	0.601	1.1	0.148	0.627	0.914	0.163	0.563	chr2	+	2875156	2876529	17	4.24095	4.14027	4.02079	4.10257	3.98887	3.89543	4.04799	4.10989	3.85346	4.35127	4.47232	4.36508
HECW2	ENST00000260983	16906749	1.244	0.01	0.403	1.082	0.226	0.694	1.036	0.634	0.875	chr2	-	197063977	197458416	31	5.10006	5.34005	5.24699	5.29497	4.34373	4.23303	4.36834	4.43699	4.24036	4.22328	4.59623	4.49748
DNAJB2	ENST00000336576	16891229	1.244	0.022	0.46	1.314	0.003	0.209	1.12	0.102	0.484	chr2	+	220143989	220151622	38	6.39904	6.43425	6.65289	6.50621	6.50114	6.61692	6.96899	6.93782	6.63754	6.51519	6.80257	6.98016
	---	16669282	1.244	0.027	0.469	1.211	0.045	0.467	1.004	0.962	0.99	chr1	+	118320271	118321523	15	7.0674	7.28653	7.0366	7.33024	7.06981	7.12264	7.51036	7.23385	7.07352	7.15597	7.31475	7.5443
	---	16729540	1.244	0.076	0.548	0.941	0.437	0.817	0.941	0.455	0.787	chr11	+	80800493	80808462	19	3.71622	3.5192	3.42946	3.63066	3.67523	3.45095	3.41564	3.53599	3.468	3.75508	3.77911	4.07336
	---	16972989	1.244	0.076	0.549	0.953	0.644	0.902	1.207	0.014	0.261	chr4	+	186936734	186940103	20	3.97892	3.99639	4.20413	4.31609	3.84255	4.22288	4.06566	3.8599	4.21966	3.85581	4.25503	4.45132
TSPAN32	NM_139022	16720852	1.244	0.133	0.616	1.085	0.208	0.679	0.828	0.161	0.56	chr11	+	2323227	2339430	19	6.25208	6.3928	6.30024	5.80064	6.45452	6.36582	6.48657	6.5701	5.7065	6.23321	6.35271	6.21705
FAM220A	NM_001037163	17055006	1.244	0.186	0.662	0.952	0.46	0.828	0.929	0.202	0.602	chr7	-	6369040	6388612	10	7.47632	7.49819	7.34452	7.41605	7.7184	7.69095	7.54856	7.71788	6.90528	7.1611	7.64843	7.04849
	---	16987073	1.243	0.009	0.402	0.93	0.504	0.849	0.92	0.44	0.779	chr5	+	87620834	87643119	22	3.90044	3.88249	3.5575	3.98483	4.45744	4.25704	4.45216	4.05308	3.71495	3.78969	4.0756	4.05777
MIR4478	NR_039690	17098069	1.243	0.009	0.403	1.032	0.673	0.911	0.873	0.121	0.511	chr9	-	124882361	124882446	16	3.72195	3.47917	3.46814	3.34082	3.63329	3.47397	3.5104	3.68721	3.45088	3.54444	3.8151	3.80904
C4orf34	BC008502	16975333	1.243	0.011	0.408	1.077	0.242	0.705	1.345	0.005	0.188	chr4	-	39552535	39640710	19	6.50579	6.28664	6.84378	6.80454	8.44963	8.42908	8.49291	8.5991	5.72561	5.60902	5.98312	5.97881
	---	17044698	1.243	0.012	0.412	0.903	0.151	0.629	0.932	0.388	0.747	chr7	+	29676027	29677540	19	3.83933	3.95288	3.66785	3.9217	3.9373	3.79111	3.67689	3.75716	3.80498	3.85949	4.08366	4.20948
GABRR2	ENST00000402938	17021573	1.243	0.013	0.414	1	0.999	1	0.968	0.674	0.892	chr6	-	89967239	90025018	16	6.30691	6.11021	6.25189	6.07108	6.24604	6.25534	6.23177	6.26977	6.14803	6.01667	6.42396	6.36906
IGLV4-60	ENST00000390284	16927700	1.243	0.014	0.422	0.916	0.158	0.637	0.734	0.012	0.249	chr22	+	22516592	22517074	14	6.67785	6.35175	6.01531	6.11956	6.20169	6.23767	6.11782	6.06918	6.04516	5.97694	6.25821	6.39244
VAX1	NM_199131	16718747	1.243	0.02	0.457	1.094	0.201	0.674	0.947	0.499	0.811	chr10	-	118888032	118897812	23	5.29842	5.06459	5.02826	5.17836	5.22198	5.21697	5.43112	5.26501	5.22485	5.08292	5.54092	5.39503
	---	16658641	1.243	0.022	0.462	1.702	0	0.023	1.698	0	0.037	chr1	+	9242271	9243855	15	5.68732	5.59946	6.33529	6.47969	5.86775	5.86193	6.59409	6.66952	5.32115	5.43912	5.78503	5.60237
RGS7	NM_002924	16701049	1.243	0.023	0.462	0.953	0.473	0.834	0.93	0.272	0.663	chr1	-	240931554	241520530	20	3.35627	3.26485	3.1336	3.27661	3.1377	3.00261	3.04918	2.95397	2.9753	3.19457	3.414	3.38395
CDC25C	ENST00000534892	17000439	1.243	0.023	0.462	0.941	0.357	0.776	1.022	0.758	0.924	chr5	-	137620954	137674044	35	8.15573	8.36409	8.24933	8.33337	7.94513	8.09439	7.9087	7.95484	8.04745	7.89441	8.20595	8.3642
	---	16785512	1.243	0.027	0.47	1.076	0.274	0.725	0.962	0.506	0.814	chr14	+	66578250	66596708	17	4.37344	4.26009	4.24555	4.27604	4.33737	4.36452	4.38148	4.53148	4.14845	4.31316	4.63689	4.45354
	---	17021001	1.243	0.027	0.47	1.077	0.307	0.747	1.015	0.783	0.934	chr6	-	79519432	79523020	19	3.08183	3.12535	3.13718	3.11172	3.10333	3.06528	3.08952	3.29351	2.9455	3.15058	3.42907	3.29478
	---	16766655	1.243	0.033	0.484	1.012	0.855	0.963	1.161	0.03	0.329	chr12	-	58087915	58115293	22	7.59149	7.63157	7.79003	7.86279	8.60628	8.54568	8.6661	8.51966	8.11302	7.84332	8.28918	8.29418
GALE	NM_001127621	16683397	1.243	0.06	0.531	1.031	0.666	0.908	1.206	0.046	0.373	chr1	-	24122089	24127294	18	7.59435	7.80685	7.89014	8.05015	7.2334	7.02365	7.16128	7.18362	7.28411	7.19635	7.7326	7.37675
RASSF4	NM_032023	16704320	1.243	0.121	0.607	0.92	0.239	0.702	0.905	0.153	0.551	chr10	+	45454855	45490172	21	5.6084	5.64869	5.56856	5.40063	5.72058	5.58127	5.47388	5.5882	6.02748	6.31463	6.69801	6.27126
	---	16728054	1.242	0.008	0.401	1.092	0.247	0.708	0.955	0.468	0.795	chr11	+	67889047	67897983	20	5.39221	5.40036	5.24367	5.41393	5.42723	5.28814	5.39769	5.57092	5.23242	5.22454	5.56978	5.51224
MIP	NM_012064	16766175	1.242	0.008	0.401	0.993	0.935	0.984	0.886	0.089	0.468	chr12	-	56843286	56862950	20	5.0126	5.11818	4.95228	4.82788	4.97193	5.22363	5.01042	5.16582	5.04161	5.07711	5.34449	5.40052
EFNA1	ENST00000368407	16671642	1.242	0.009	0.402	0.943	0.56	0.872	1.066	0.246	0.641	chr1	+	155099936	155107386	20	7.26422	7.2511	7.36278	7.33712	7.66191	7.83444	7.48554	7.84371	7.40872	7.3397	7.70451	7.67049
MED23	NM_004830	17023592	1.242	0.009	0.403	1.156	0.033	0.436	1.401	0.001	0.09	chr6	-	131895106	131949369	40	9.72027	9.71042	10.1556	10.2469	10.2694	10.27	10.4745	10.4826	9.79457	9.71681	10.0861	10.0517
GOLGA1	ENST00000373555	17098332	1.242	0.01	0.404	0.985	0.828	0.956	1.052	0.423	0.769	chr9	-	127640573	127710292	22	8.06256	8.14404	8.10976	8.24262	8.60766	8.52249	8.45134	8.63551	8.0354	8.13086	8.41624	8.37634
FAT1	NM_005245	16982269	1.242	0.012	0.41	1.169	0.092	0.554	1.198	0.014	0.256	chr4	-	187508937	187647876	30	11.2126	11.1435	11.4244	11.4546	10.6847	10.4029	10.7249	10.8126	9.32332	9.42136	9.72473	9.64564
OR2F2	ENST00000408955	17052881	1.242	0.019	0.453	1.127	0.198	0.671	0.911	0.245	0.641	chr7	+	143632259	143633372	9	3.0268	3.28617	3.01948	3.02314	2.86022	2.70683	3.09912	2.81206	2.87136	2.93457	3.1241	3.30686
	---	16793800	1.242	0.02	0.457	0.837	0.243	0.705	1.102	0.151	0.549	chr14	-	64889653	64915275	17	4.161	4.23008	4.40443	4.2658	5.81435	5.16802	5.21177	5.25939	3.87801	3.7878	4.05571	4.23697
	---	16879956	1.242	0.024	0.464	1.007	0.935	0.984	1.025	0.657	0.885	chr2	+	48444714	48445038	9	2.65817	2.75797	2.75619	2.73206	2.95397	2.65797	2.81172	2.81936	2.56833	2.79308	2.9899	2.99763
	---	16995044	1.242	0.032	0.482	0.902	0.14	0.618	1.177	0.224	0.621	chr5	-	33519721	33522335	14	3.74122	3.34435	3.95528	3.60111	3.72155	3.58472	3.4672	3.54049	3.73838	3.73059	3.91388	4.18065
	---	16699102	1.242	0.035	0.49	0.921	0.447	0.821	0.889	0.27	0.662	chr1	-	212827341	212838776	18	4.71132	4.61454	4.68857	4.30015	4.87862	4.48669	4.66251	4.46674	4.36722	4.58407	4.8759	4.70179
	---	16768715	1.242	0.036	0.493	1.042	0.677	0.912	0.961	0.527	0.825	chr12	-	95801711	95830604	19	3.48953	3.43729	3.48161	3.33046	3.50107	3.3382	3.65795	3.29941	3.37829	3.34557	3.8156	3.53374
	---	17017892	1.242	0.113	0.597	1.12	0.17	0.65	1.051	0.593	0.857	chr6	-	32517717	32517867	14	3.73797	4.08108	3.93671	4.02556	3.44207	3.69766	3.71514	3.75247	3.51494	3.97008	3.95889	4.15124
LOC100506455	XR_109787	16877547	1.242	0.184	0.66	1.215	0.037	0.444	1.132	0.313	0.696	chr2	+	20232415	20234178	20	7.97229	7.51881	8.01915	7.82972	7.90528	7.71785	8.18342	8.00173	7.75492	7.92999	7.8466	8.46376
	---	16902905	1.242	0.26	0.717	0.898	0.248	0.708	0.834	0.077	0.444	chr2	-	132741510	132751734	8	6.63611	6.88437	6.61001	6.38622	6.68898	6.94845	6.77211	6.55304	5.52485	6.14302	6.39687	5.89662
BCL6	NM_001706	16962584	1.241	0.008	0.401	0.862	0.056	0.49	1.448	0	0.06	chr3	-	187439165	187463515	24	7.79553	7.79384	8.34874	8.30834	8.33296	8.17439	8.00261	8.0766	7.20271	7.17063	7.51406	7.48039
EOGT	ENST00000295571	16956002	1.241	0.009	0.403	0.931	0.284	0.731	1.045	0.443	0.781	chr3	-	69024365	69063112	40	9.79093	9.81601	9.81447	9.92063	9.95417	9.82816	9.74586	9.8305	10.8464	10.7851	11.1002	11.1546
LAMA1	NM_005559	16853716	1.241	0.011	0.409	1.094	0.322	0.756	0.863	0.047	0.377	chr18	-	6941743	7117813	57	4.61143	4.46659	4.35483	4.29682	4.24379	4.55198	4.46969	4.5851	5.92068	6.02419	6.31361	6.25386
LIFR	NM_001127671	16995500	1.241	0.012	0.411	1.056	0.556	0.87	1.022	0.84	0.953	chr5	-	38475065	38608456	27	6.7026	6.80808	6.57854	6.99352	4.12281	3.82413	4.14815	3.95575	3.99121	3.87177	4.26231	4.22476
	---	16934361	1.241	0.016	0.432	0.919	0.313	0.751	1.053	0.492	0.807	chr22	-	35107899	35120910	22	3.60994	3.57908	3.79083	3.54703	3.94556	3.66523	3.65983	3.70749	3.7913	3.78027	4.01484	4.18079
	---	16811882	1.241	0.024	0.464	1.01	0.891	0.972	1.013	0.834	0.952	chr15	-	76109433	76109504	9	2.66469	2.77394	2.70367	2.77021	2.71479	2.61536	2.58653	2.77137	2.86145	2.68467	3.15544	3.01464
	---	17127675	1.241	0.025	0.464	1.104	0.419	0.809	0.953	0.484	0.803	---	---	---	---	11	4.88445	5.07055	4.87074	4.94608	4.92677	5.07661	5.39159	4.89683	4.84869	4.87003	5.05729	5.28256
NOXRED1	NM_001113475	16795136	1.241	0.027	0.469	1.188	0.044	0.465	1.212	0.13	0.523	chr14	-	77860364	77889860	23	5.41091	4.98387	5.37257	5.57717	5.56016	5.67818	5.77403	5.96121	5.10074	5.27146	5.58428	5.41286
	---	17065985	1.241	0.028	0.474	1.001	0.988	0.998	1.045	0.41	0.761	chr8	+	16405933	16425143	15	3.52077	3.4866	3.56605	3.56835	3.52104	3.41897	3.41069	3.5321	3.28171	3.51818	3.67567	3.74867
AKR1B15	ENST00000423958	17051844	1.241	0.029	0.477	0.82	0.077	0.531	0.959	0.626	0.872	chr7	+	134233849	134264592	11	4.01646	3.99743	4.10304	3.79098	4.25032	4.64726	4.16656	4.1578	3.81746	3.58204	3.96858	4.05282
	---	16851699	1.241	0.034	0.488	0.999	0.978	0.996	1.071	0.497	0.81	chr18	+	27227189	27229540	18	3.30196	2.92313	3.26298	3.15954	3.01865	3.06148	3.01567	3.05987	3.0029	3.06244	3.21109	3.47553
LOC147670	NM_001193628	16865950	1.241	0.042	0.501	0.985	0.895	0.973	1.094	0.304	0.689	chr19	+	57154527	57168614	19	5.25929	5.09705	5.17741	5.43974	5.25543	5.48319	5.5671	5.12774	5.67349	5.78086	6.17889	5.89689
	---	16687962	1.241	0.05	0.519	0.927	0.304	0.744	0.949	0.448	0.784	chr1	-	61125303	61291256	18	3.61013	3.80487	3.65622	3.60848	3.92373	4.13913	3.92304	3.92051	3.55693	3.79797	4.10294	3.87461
	---	16878659	1.241	0.068	0.539	1.015	0.828	0.956	0.999	0.987	0.996	chr2	+	30147350	30152828	19	3.82781	4.00185	4.02624	3.79969	3.83938	3.66526	3.76841	3.77763	3.79745	3.72541	4.2638	3.88394
	---	17005996	1.241	0.065	0.539	1.341	0.008	0.301	1.083	0.678	0.894	chr6	+	28883422	28883521	9	4.0469	3.58294	4.28811	3.57078	3.3492	3.48259	3.71747	3.95934	3.38936	3.58309	3.63545	3.95886
OLFML3	NM_020190	16668997	1.241	0.073	0.547	0.965	0.597	0.885	1.008	0.891	0.969	chr1	+	114522030	114524876	25	4.20728	4.20534	4.16029	4.27475	4.28834	4.14217	4.225	4.10089	4.42179	4.17915	4.45345	4.76905
RHOXF2B	ENST00000371402	17113677	1.241	0.075	0.548	1.025	0.691	0.917	0.846	0.107	0.492	chrX	-	119205848	119211707	9	4.39566	4.11288	4.119	3.90847	4.28265	4.29805	4.25458	4.39846	4.04591	4.29713	4.64272	4.32461
	---	16676350	1.241	0.078	0.553	1.051	0.553	0.868	0.961	0.523	0.823	chr1	+	204633000	204633741	24	4.23941	4.2172	4.25044	4.08996	4.3205	4.19703	4.47004	4.19193	3.87464	4.24718	4.28447	4.45994
	---	16869919	1.241	0.084	0.563	1.024	0.748	0.934	0.776	0.11	0.496	chr19	-	15716475	15718461	12	4.98147	4.42561	4.2131	4.46285	4.26094	4.48124	4.3577	4.45335	4.19195	4.17409	4.28217	4.70604
	---	16993321	1.241	0.103	0.588	0.898	0.307	0.747	0.884	0.058	0.403	chr5	+	178396391	178417117	17	5.13371	5.05523	4.93459	4.89752	5.20206	5.01572	4.76698	5.13905	4.89476	4.71049	4.89728	5.32933
	---	16797451	1.241	0.115	0.601	0.94	0.572	0.877	0.915	0.296	0.683	chr14	-	106494045	106730335	9	5.80372	5.96902	5.64002	5.87741	5.84385	6.24561	6.06005	5.85213	5.64292	5.86175	5.84051	6.2878
LOC645949	NR_038837	16895063	1.24	0.01	0.404	1.134	0.091	0.553	1.023	0.678	0.894	chr2	-	21910306	21933524	18	3.25962	3.29431	3.35571	3.26502	3.40357	3.25421	3.46779	3.55155	3.32546	3.23952	3.57942	3.605
	---	17067748	1.24	0.012	0.411	1.177	0.145	0.624	1.104	0.14	0.536	chr8	+	32853696	32902373	14	9.99786	9.95551	10.0482	10.1908	4.9438	4.86251	5.34375	4.93193	5.31317	5.41736	5.70691	5.64354
DHRS9	NM_005771	16887237	1.24	0.013	0.418	1.023	0.698	0.919	0.936	0.257	0.651	chr2	+	169921299	169952677	26	3.88284	3.91466	3.76477	3.84336	3.78414	3.88106	3.8603	3.87125	3.68434	3.7256	4.08172	3.94838
	---	17106385	1.24	0.018	0.449	1.117	0.112	0.586	0.874	0.129	0.522	chrX	+	114957297	114959383	11	7.1742	6.89723	6.87198	6.80997	6.98417	6.96769	7.2062	7.06513	7.1102	7.00146	7.44021	7.29197
MIR1298	NR_031578	17106334	1.24	0.031	0.48	1.237	0.008	0.305	0.991	0.919	0.977	chrX	+	113949650	113949761	24	3.49175	3.80121	3.71652	3.5496	3.51381	3.60144	3.85251	3.8768	3.62538	3.5389	3.77168	4.01292
	---	16907154	1.24	0.04	0.5	1.015	0.826	0.955	1.007	0.913	0.975	chr2	-	201727875	201727970	8	2.83268	2.66366	2.75006	2.76619	2.8035	2.89822	2.78691	2.95829	2.72939	2.7507	3.19773	2.90303
ZNF345	NM_001242474	16861465	1.24	0.067	0.539	1.087	0.174	0.654	1.001	0.984	0.995	chr19	+	37341260	37384120	32	3.82922	3.7197	3.76232	3.78983	3.79436	3.74593	3.90868	3.87246	5.25895	5.06057	5.63124	5.30831
TMIE	NM_147196	16940233	1.24	0.072	0.545	1.008	0.905	0.975	0.962	0.463	0.791	chr3	+	46742823	46752413	21	5.61952	5.58508	5.53953	5.55233	5.82767	5.64971	5.76463	5.73561	5.10652	5.45012	5.6856	5.49163
	---	16664680	1.24	0.202	0.675	1.061	0.591	0.883	1.309	0.02	0.287	chr1	+	52259721	52264173	18	5.81171	5.53607	5.96963	6.15546	6.17934	5.83995	6.24616	5.94251	6.08567	6.02642	6.03144	6.70159
	---	16736703	1.239	0.009	0.403	0.93	0.504	0.849	0.994	0.934	0.981	chr11	-	22282755	22283802	24	3.36373	3.50599	3.31014	3.54114	3.2856	3.61866	3.19878	3.49651	3.20183	3.27616	3.55855	3.53787
LRRC10	NM_201550	16767369	1.239	0.012	0.413	1.112	0.182	0.661	0.981	0.797	0.939	chr12	-	70002344	70004942	18	5.11384	4.9614	5.11174	4.90783	5.19713	4.98239	5.2961	5.19024	5.03192	4.90749	5.26305	5.29457
LOC100507462	NM_001242740	17024221	1.239	0.013	0.415	0.898	0.165	0.644	0.992	0.94	0.983	chr6	-	139046348	139094816	21	6.23514	6.17919	6.39987	5.99226	6.2047	6.42012	6.17421	6.14115	5.90903	5.98122	6.31115	6.19729
	---	16668768	1.239	0.02	0.457	1.087	0.176	0.655	1.142	0.125	0.517	chr1	+	112738124	112738228	8	4.00553	4.22333	4.22686	4.38496	4.15064	4.1197	4.22741	4.28353	4.15096	4.19275	4.38477	4.57734
H2AFJ	NM_177925	16748675	1.239	0.02	0.457	0.88	0.06	0.498	1.048	0.404	0.757	chr12	+	14927270	14930936	15	6.35369	6.42858	6.45603	6.46004	7.59461	7.58768	7.36689	7.44758	5.49036	5.47705	5.88927	5.69552
CNKSR1	NM_006314	16661071	1.239	0.024	0.464	1.099	0.279	0.728	1.272	0.007	0.205	chr1	+	26503894	26516377	18	7.52633	7.58362	7.9703	7.83269	7.15119	7.41003	7.33769	7.49605	5.31519	5.44119	5.77701	5.59747
TCF21	ENST00000367882	17012761	1.239	0.048	0.516	0.863	0.157	0.636	0.962	0.698	0.901	chr6	+	134210259	134216691	20	4.02033	4.41909	4.13741	4.18908	4.17747	4.55841	4.14577	4.16504	4.03631	4.26552	4.57139	4.34811
RNF182	NM_001165032	17004989	1.239	0.048	0.517	1.006	0.935	0.984	0.894	0.171	0.571	chr6	+	13924677	13980533	24	6.14374	6.05315	6.05523	5.81959	5.05114	5.01539	5.12908	4.95301	4.89295	5.09897	5.42774	5.18121
	---	17098319	1.239	0.052	0.52	0.908	0.122	0.595	1.06	0.437	0.777	chr9	-	127431666	127432491	9	3.1437	3.30635	3.21885	3.39995	3.39995	3.37234	3.26407	3.23023	3.62976	3.4409	3.70757	3.9819
BMS1P4	AK294783	16715611	1.239	0.06	0.531	1.02	0.765	0.938	1.084	0.341	0.716	chr10	-	75458909	75490272	9	6.68063	6.48012	6.5892	6.80454	7.42981	7.59608	7.51037	7.57284	6.90898	6.70281	7.26109	6.96904
ERN2	NM_033266	16825120	1.239	0.071	0.543	1.148	0.116	0.589	1.045	0.535	0.828	chr16	-	23701625	23724821	19	6.73813	6.57005	6.64874	6.78537	6.38517	6.11187	6.44924	6.44481	6.09676	6.47541	6.63812	6.55106
	---	17092309	1.239	0.091	0.572	1.029	0.719	0.925	1.086	0.339	0.715	chr9	-	7782483	7788763	19	5.30298	5.27685	5.56013	5.25805	5.08255	5.09247	4.99087	5.26657	5.86306	6.19347	6.48079	6.19347
	---	16981898	1.239	0.139	0.621	0.967	0.644	0.902	0.976	0.734	0.915	chr4	-	184254595	184271991	22	4.36685	4.28387	4.18688	4.3946	4.51622	4.4192	4.31143	4.52555	4.19779	4.21868	4.78851	4.24632
PJA2	NM_014819	16998727	1.238	0.008	0.399	0.971	0.603	0.888	1.258	0.005	0.181	chr5	-	108670410	108745695	22	8.82659	8.85261	9.19817	9.14256	9.17676	9.22282	9.17305	9.14076	8.45457	8.45028	8.76183	8.75883
C17orf65	NR_049729	16845567	1.238	0.01	0.404	1.072	0.332	0.763	1.11	0.102	0.484	chr17	-	42253345	42264082	21	8.96117	8.86296	9.07715	9.04716	8.89551	8.8355	8.87023	9.061	8.21234	8.14775	8.52116	8.45522
	---	16818919	1.238	0.011	0.408	0.93	0.284	0.731	0.963	0.653	0.883	chr16	+	52641000	52648675	16	3.95535	3.6599	3.74095	3.76724	3.68503	3.82725	3.68519	3.61955	3.53007	3.63235	3.87413	3.90498
C3orf45	BC028000	16941042	1.238	0.011	0.408	1.07	0.343	0.77	0.986	0.865	0.962	chr3	+	50316458	50325545	16	5.69636	5.49628	5.70305	5.44731	5.91409	5.72	5.91057	5.91678	5.54595	5.57827	5.92027	5.81929
LIMA1	NM_001113547	16764564	1.238	0.012	0.411	0.966	0.542	0.865	1.107	0.091	0.471	chr12	-	50569489	50677353	24	8.40911	8.36254	8.52083	8.54495	8.39469	8.42144	8.36092	8.35583	6.73008	6.81839	7.04206	7.12288
	---	16910136	1.238	0.012	0.411	1.075	0.424	0.811	1.057	0.46	0.79	chr2	-	241166977	241195452	23	4.97668	4.80774	5.05774	4.8858	6.294	6.46476	6.33934	6.62758	5.33724	5.32227	5.69639	5.58001
	---	16981948	1.238	0.013	0.414	1.134	0.154	0.631	0.949	0.416	0.765	chr4	-	185192863	185198481	19	4.03206	3.96279	3.99962	3.84264	3.93124	3.97445	4.2777	3.99134	3.81941	3.90811	4.21917	4.12401
PSMB2	AB209470	16685139	1.238	0.015	0.429	1.065	0.437	0.817	1.038	0.583	0.852	chr1	-	36035414	36043330	22	6.0455	6.0006	6.17396	5.97952	6.01444	5.82149	6.11053	5.90799	5.80199	5.94996	6.20592	6.16149
C10orf71	NM_001135196	16704783	1.238	0.015	0.429	1.032	0.662	0.907	0.994	0.927	0.98	chr10	+	50507187	50535537	22	5.01465	5.08851	5.12432	4.96194	4.9376	5.09793	5.14906	4.97916	5.02099	5.01046	5.40001	5.24709
OR10G8	ENST00000431524	16732801	1.238	0.015	0.429	1.17	0.185	0.663	1.103	0.177	0.576	chr11	+	123900297	123901341	17	4.00993	3.81305	4.05636	4.04923	4.23275	4.08818	4.16516	4.60861	4.35285	4.20492	4.60139	4.57222
NPPA-AS1	NR_037806	16659133	1.238	0.017	0.443	1.225	0.069	0.517	1.121	0.177	0.576	chr1	+	11900376	11908136	20	6.25674	6.2983	6.57768	6.30784	5.53593	5.34111	5.56331	5.89887	5.64133	5.79014	5.98089	6.06682
FGF19	ENST00000294312	16741393	1.238	0.024	0.464	1.103	0.18	0.658	0.896	0.251	0.647	chr11	-	69513000	69519410	23	8.28048	8.02415	7.88124	8.10805	5.77496	5.95179	5.97063	6.03857	5.27109	5.4697	5.72153	5.63545
METTL20	ENST00000538463	16749733	1.238	0.041	0.5	1.146	0.073	0.524	1.162	0.094	0.476	chr12	+	31800094	31826048	29	4.9136	4.75657	4.93816	5.16442	4.93257	4.88561	5.02045	5.19137	4.91146	5.08782	5.42592	5.18995
	---	16761314	1.238	0.042	0.501	0.959	0.559	0.871	0.999	0.985	0.996	chr12	-	10370462	10372350	17	3.72427	3.45508	3.62788	3.54717	3.48734	3.67989	3.56421	3.48357	3.67643	3.59082	3.79909	4.08503
NRSN2	NM_024958	16910601	1.238	0.043	0.504	0.901	0.25	0.709	1.097	0.205	0.606	chr20	+	327370	335512	21	4.93936	4.79224	4.92657	5.07304	6.45951	6.19959	6.27468	6.08275	4.77107	4.86039	4.9788	5.2683
	---	16972607	1.238	0.045	0.506	1.017	0.768	0.939	0.943	0.452	0.786	chr4	+	177590772	177627299	12	3.98159	4.06164	4.06017	3.81499	4.14368	4.11366	4.1894	4.1171	3.80193	3.54513	4.06667	3.8957
	---	17057056	1.238	0.044	0.506	1.223	0.09	0.551	1.245	0.021	0.293	chr7	-	43278665	43288867	21	3.97095	3.76261	4.24363	4.12232	3.77803	4.17336	4.17411	4.35791	4.09561	4.20315	4.60036	4.31383
RNLS	ENST00000371947	16716327	1.238	0.06	0.531	0.901	0.113	0.587	1.091	0.323	0.704	chr10	-	90033621	90344287	25	4.42668	4.60787	4.76621	4.51758	4.60829	4.5436	4.3899	4.46228	4.52662	4.21285	4.59414	4.76165
KHDC1L	NM_001126063	17020750	1.238	0.064	0.536	1.048	0.469	0.832	0.885	0.089	0.468	chr6	-	73933267	73935493	11	6.15028	6.14688	5.88664	6.05607	5.955	5.81086	5.97156	5.92945	5.37177	5.73434	5.83383	5.88733
NKX1-1	ENST00000422806	16973551	1.238	0.068	0.539	1.134	0.3	0.741	0.818	0.035	0.342	chr4	-	1396720	1400119	12	7.68207	7.44153	7.32563	7.21734	7.24057	7.62662	7.77077	7.45746	6.91766	7.1963	7.49383	7.23697
TTC3P1	NR_030737	17112253	1.238	0.172	0.653	0.944	0.438	0.817	0.825	0.055	0.398	chrX	-	74960373	74962914	9	7.06292	7.21966	6.72861	6.99715	8.31038	8.46126	8.38834	8.21757	7.00536	7.61066	7.63744	7.59497
ALDH4A1	NM_003748	16682460	1.237	0.009	0.403	0.94	0.298	0.74	1.218	0.018	0.279	chr1	-	19197924	19229293	40	6.58535	6.62307	6.97108	6.80772	7.59283	7.58756	7.46475	7.53559	7.31392	7.25437	7.59701	7.58478
SMPD3	ENST00000219334	16827606	1.237	0.01	0.403	1.127	0.141	0.619	0.926	0.316	0.699	chr16	-	68392230	68482591	29	5.8361	5.6354	5.69387	5.55527	5.62447	5.83196	5.95802	5.84163	5.56309	5.51723	5.81651	5.8773
TRIM38	NM_006355	17005515	1.237	0.01	0.404	0.946	0.389	0.795	1.27	0.004	0.179	chr6	+	25963030	25985531	24	8.76384	8.83939	9.12223	9.17027	7.34076	7.31863	7.18037	7.31908	7.64222	7.55833	7.91363	7.90172
MTPAP	ENST00000471055	16712975	1.237	0.011	0.408	1.447	0.001	0.122	0.764	0.008	0.215	chr10	-	30653256	30663377	14	5.20623	5.00879	4.66465	4.77297	4.79615	4.91709	5.44385	5.33534	5.13333	5.06811	5.36857	5.44657
LOC149837	NR_015406	16916988	1.237	0.019	0.453	1.054	0.571	0.876	1.11	0.283	0.673	chr20	-	5466188	5485259	26	4.4319	4.09791	4.34968	4.48291	4.40743	4.34645	4.63151	4.27507	4.07617	4.02434	4.44585	4.2692
LOC100652992	XR_132606	16816687	1.237	0.02	0.457	0.914	0.216	0.686	1.081	0.228	0.624	chr16	+	21413472	21414711	16	7.54736	7.59814	7.61507	7.75604	7.38326	7.232	7.2372	7.12014	7.18161	7.26949	7.4469	7.6176
MIR921	NR_030626	16695934	1.237	0.022	0.462	1.158	0.24	0.703	1.036	0.849	0.956	chr1	-	166123980	166124035	8	4.01572	4.05865	3.6722	4.50467	4.28101	3.77438	4.20167	4.27822	4.08955	3.94172	4.39373	4.25071
	---	17044403	1.237	0.025	0.464	1.002	0.972	0.995	1.055	0.497	0.81	chr7	+	24940431	24940524	11	2.97586	3.11878	3.23575	3.01225	2.98001	3.06541	2.95533	3.09673	2.91176	3.12698	3.30119	3.35058
	---	16658265	1.237	0.028	0.473	1.161	0.24	0.703	0.938	0.26	0.655	chr1	+	4192617	4194185	23	5.45296	5.4767	5.4031	5.34324	5.45711	5.51871	5.96175	5.44443	5.21488	5.35813	5.68864	5.49876
	---	17011812	1.237	0.028	0.474	1.117	0.372	0.785	1.182	0.247	0.642	chr6	+	113292695	113292801	9	4.19839	4.59812	4.85137	4.42633	4.71549	4.85868	4.6953	5.19829	4.63092	4.46384	4.76902	4.93875
	---	16998510	1.237	0.033	0.487	1.435	0.004	0.245	0.966	0.76	0.925	chr5	-	98858120	98861727	8	5.96285	5.53899	5.79873	5.60349	5.43993	5.13428	5.75397	5.86129	5.1298	5.08952	5.28662	5.54609
ARHGEF6	ENST00000250617	17114520	1.237	0.052	0.521	0.981	0.758	0.936	1.084	0.17	0.571	chrX	-	135747706	135864247	19	4.43844	4.45798	4.60001	4.52881	3.50073	3.55557	3.43918	3.56192	4.14989	4.4373	4.68188	4.51899
	---	16926188	1.237	0.067	0.539	1.172	0.128	0.603	1.067	0.379	0.742	chr21	-	44777430	44782568	19	5.73596	5.54441	5.80038	5.66832	5.30128	5.67565	5.73028	5.70465	5.70399	5.55399	5.76431	6.10822
	---	16952095	1.236	0.008	0.401	0.989	0.87	0.966	1.527	0.001	0.085	chr3	-	33839482	33840004	21	7.09518	7.13768	7.8246	7.62983	8.83213	8.88494	8.74348	8.94076	8.68001	8.68125	8.99868	8.97532
	---	16696341	1.236	0.009	0.403	0.988	0.835	0.957	0.873	0.199	0.6	chr1	-	170556390	170557377	10	2.8793	3.215	2.94803	2.75446	2.93972	2.85987	2.91761	2.84606	2.9612	3.00081	3.26516	3.30791
LOC100506668	NR_038854	16771319	1.236	0.011	0.408	1.306	0.002	0.186	1.368	0.002	0.12	chr12	-	120928131	120933749	21	8.75404	8.72422	9.25076	9.13098	8.63148	8.58666	8.98734	9.0003	8.78873	8.87038	9.16644	9.10472
ASGR1	NM_001671	16840502	1.236	0.013	0.414	0.999	0.987	0.998	0.862	0.254	0.65	chr17	-	7076750	7082883	23	6.89974	6.57755	6.72744	6.32229	6.68664	6.60822	6.71958	6.57225	6.66499	6.78654	7.04445	7.01829
IPP	NM_005897	16686538	1.236	0.014	0.423	0.943	0.36	0.778	1.185	0.026	0.315	chr1	-	46159996	46216485	29	8.02466	8.03625	8.2049	8.34623	8.62534	8.50304	8.46408	8.49716	7.92067	7.78669	8.17404	8.14527
MIR3663	NR_037436	16718764	1.236	0.014	0.423	0.74	0.027	0.416	1.062	0.323	0.704	chr10	-	118927189	118927285	12	3.27119	3.31414	3.3178	3.44233	4.08434	3.89478	3.7657	3.3441	3.48202	3.34369	3.71678	3.72026
DFNB31	NM_015404	17097603	1.236	0.038	0.497	1.229	0.015	0.358	1.216	0.026	0.315	chr9	-	117164360	117267736	33	6.46809	6.67594	6.83386	6.8748	6.63677	6.77076	7.04475	6.95607	8.0116	8.09336	8.49126	8.22483
KRBA2	NM_213597	16840965	1.236	0.05	0.519	0.835	0.059	0.496	1.05	0.56	0.842	chr17	-	8271955	8280029	18	5.86658	5.90784	6.10436	5.80966	6.78824	7.00467	6.53855	6.73464	5.17449	4.98212	5.51363	5.25526
	---	16785099	1.236	0.058	0.53	1.202	0.018	0.375	0.993	0.933	0.981	chr14	+	62278692	62437037	19	4.80164	4.57338	4.57924	4.77588	4.62814	4.7405	4.95575	4.9437	4.52873	4.7145	5.07274	4.78176
TMEM92	NM_153229	16835772	1.236	0.06	0.531	1.388	0.009	0.31	0.865	0.061	0.411	chr17	+	48348767	48358846	20	7.1006	7.07536	6.97188	6.78475	4.93536	5.28139	5.53934	5.62422	5.21202	5.52634	5.756	5.59485
KRT86	ENST00000544024	16751518	1.236	0.066	0.539	1.122	0.125	0.599	1.037	0.518	0.82	chr12	+	52643084	52702947	17	6.03353	6.03532	6.14142	6.03437	6.7476	6.60935	6.77866	6.91024	5.82212	5.86642	5.96706	6.3337
	---	16949836	1.236	0.074	0.548	0.971	0.651	0.904	0.929	0.323	0.704	chr3	+	195311256	195327734	16	3.50496	3.36108	3.41699	3.23649	3.38419	3.24834	3.32387	3.22285	2.95689	3.32484	3.51228	3.38052
HERC5	NM_016323	16968765	1.236	0.106	0.591	0.916	0.326	0.759	0.992	0.909	0.974	chr4	+	89378268	89427314	22	7.02624	7.07151	6.94661	7.12965	3.74596	4.06822	3.77523	3.78558	3.95707	3.9411	4.48869	4.0216
LOC283214	NR_046090	16742312	1.236	0.161	0.643	1.092	0.244	0.706	0.972	0.597	0.859	chr11	-	75469500	75479692	18	4.63163	4.60297	4.60399	4.54876	4.41508	4.36549	4.62386	4.41014	4.33722	4.55974	4.48675	5.02122
	---	17076573	1.235	0.009	0.402	1.149	0.072	0.522	0.989	0.869	0.963	chr8	-	39949028	40004064	18	3.13354	3.01416	2.98125	3.13503	2.99819	3.08054	3.15682	3.32295	3.11265	3.16232	3.44005	3.44471
	---	16890331	1.235	0.01	0.404	1.029	0.663	0.907	0.868	0.041	0.359	chr2	+	211036242	211095107	16	4.7989	4.90528	4.63865	4.65593	5.30136	5.13115	5.25948	5.25576	4.98744	4.9458	5.30349	5.23754
RAD21-AS1	NR_033886	17072047	1.235	0.011	0.408	0.896	0.485	0.839	1.086	0.271	0.663	chr8	+	117886663	117889123	17	4.68924	4.53557	4.81351	4.64837	5.02034	4.31635	4.46347	4.55475	4.84426	4.81919	5.0898	5.18121
C17orf89	NM_001086521	16838787	1.235	0.015	0.429	1.449	0	0.086	1.474	0.002	0.12	chr17	+	79213111	79215098	19	8.73282	8.64573	9.14057	9.3586	8.31392	8.25969	8.83336	8.81076	8.56807	8.42808	8.77827	8.82781
SMPD5	XM_001714032	17073519	1.235	0.017	0.443	1.087	0.21	0.681	0.967	0.661	0.886	chr8	+	145104023	145106423	23	6.44222	6.20567	6.33505	6.21526	6.31587	6.44993	6.47853	6.52967	6.25132	6.26223	6.47813	6.64335
CSF3	NR_033662	16833953	1.235	0.018	0.447	0.988	0.842	0.959	0.871	0.035	0.343	chr17	+	38171614	38174066	19	6.3666	6.36751	6.19649	6.1378	6.30105	6.39787	6.32818	6.33696	6.15625	6.29717	6.48287	6.5799
	---	17081943	1.235	0.021	0.457	0.932	0.387	0.794	0.927	0.207	0.607	chr8	-	143808701	143809108	19	7.52089	7.42584	7.33826	7.38756	7.77387	7.50704	7.56599	7.51333	7.54183	7.41372	7.85124	7.71159
	---	16870876	1.235	0.021	0.46	1.054	0.409	0.804	0.999	0.987	0.996	chr19	-	22798359	22806773	15	5.83858	5.54037	5.65245	5.72259	5.90404	5.93878	5.93213	6.06238	5.64345	5.49651	5.93654	5.8107
ZBTB43	NM_014007	17089188	1.235	0.022	0.462	1.02	0.716	0.925	1.115	0.09	0.469	chr9	+	129567285	129600489	20	6.91332	6.9507	7.04152	7.13672	6.79237	6.7908	6.8155	6.82627	7.74329	7.59826	8.04724	7.90497
PRRG2	NM_000951	16864192	1.235	0.025	0.464	1.202	0.024	0.404	1.228	0.069	0.427	chr19	+	50084587	50094265	24	5.98581	6.3594	6.4436	6.49279	6.45431	6.49484	6.66169	6.81897	5.81188	6.02047	6.24895	6.19277
LBX1	ENST00000370193	16717688	1.235	0.025	0.466	0.963	0.541	0.864	0.94	0.41	0.76	chr10	-	102986733	102989551	23	4.5578	4.57841	4.59795	4.36047	4.53152	4.58348	4.55533	4.45178	4.19428	4.40702	4.63347	4.57683
	---	17087874	1.235	0.026	0.469	0.964	0.663	0.907	1.12	0.074	0.44	chr9	+	108870332	109173662	20	3.43978	3.44158	3.64416	3.56333	3.60705	3.54176	3.37313	3.67034	3.30476	3.49113	3.76707	3.63973
XKR6	AB073660	17074608	1.235	0.031	0.48	1.008	0.892	0.972	0.981	0.725	0.912	chr8	-	10964720	10967428	26	4.09898	4.04201	4.01413	4.07169	4.0313	3.96347	3.96815	4.04987	5.93602	5.72633	6.0696	6.20351
TAGAP	NM_054114	17025230	1.235	0.032	0.482	1.022	0.71	0.923	0.875	0.108	0.492	chr6	-	159455500	159466184	24	4.90996	4.78485	4.54831	4.75981	4.89747	4.87372	4.96202	4.87233	4.64287	4.70326	5.10075	4.85457
	---	16737146	1.235	0.033	0.485	1.123	0.36	0.778	0.997	0.955	0.989	chr11	-	33025139	33037285	17	5.92212	5.72668	5.81182	5.82613	5.90897	6.0524	6.40489	5.8904	5.88346	5.63033	6.07712	6.04454
ZNF221	NM_013359	16862866	1.235	0.038	0.497	1.084	0.228	0.695	1.233	0.169	0.569	chr19	+	44455380	44471752	12	4.76018	5.36263	5.3672	5.35892	3.17791	3.0497	3.26166	3.19781	4.71741	4.97268	5.20406	5.09538
ACP5	NM_001111035	16869023	1.235	0.055	0.528	1.38	0.002	0.174	1.045	0.555	0.839	chr19	-	11685475	11689801	21	5.19352	4.98684	5.09141	5.21477	5.05926	5.21305	5.56704	5.63583	5.1058	4.91003	5.44743	5.17547
	---	16741899	1.235	0.071	0.543	1.09	0.331	0.762	1.045	0.423	0.769	chr11	-	72866936	72873599	18	4.5499	4.61366	4.62254	4.66987	4.7935	4.49415	4.71415	4.82244	4.43172	4.783	4.84019	4.98338
UPK1A	NM_007000	16861126	1.235	0.073	0.546	0.958	0.487	0.84	1.157	0.228	0.624	chr19	+	36157715	36169367	27	6.2055	6.64464	6.55585	6.71331	5.67322	5.68233	5.55355	5.67747	5.07017	5.3814	5.64373	5.4171
CYP4A22	ENST00000371891	16664421	1.235	0.074	0.548	0.889	0.238	0.702	0.721	0.002	0.142	chr1	+	47603107	47615413	12	4.87812	4.82983	4.47595	4.28911	4.53925	4.86817	4.45131	4.61874	4.30996	4.63766	4.88142	4.67396
C11orf74	AK290833	16723748	1.235	0.084	0.563	0.884	0.12	0.594	1.035	0.643	0.879	chr11	+	36616051	36694823	21	6.32348	6.49972	6.37163	6.55209	6.51229	6.62016	6.29184	6.48516	6.8934	6.51623	6.9255	7.09471
RGPD6	NM_001123363	16884204	1.235	0.237	0.7	1.103	0.222	0.691	1.156	0.131	0.525	chr2	+	110550335	110615282	40	5.08607	5.35013	5.33449	5.52053	5.47696	5.22709	5.49019	5.49652	5.51835	5.45604	5.42984	6.1523
	---	17078412	1.234	0.01	0.404	0.941	0.535	0.862	0.958	0.475	0.799	chr8	-	77488786	77491580	23	3.98519	3.85783	3.87069	3.84929	3.98519	3.62412	3.65195	3.78309	3.91381	3.83856	4.19212	4.16618
NKX2-5	NM_001166175	17002879	1.234	0.012	0.411	1.362	0.001	0.158	0.809	0.01	0.234	chr5	-	172659107	172662360	23	6.18009	6.05299	5.81867	5.80464	7.46265	7.43212	7.84217	7.94399	7.95317	7.86625	8.24644	8.17827
	---	16980869	1.234	0.014	0.423	1.103	0.348	0.771	0.943	0.41	0.76	chr4	-	155675908	155703025	15	4.73076	4.5235	4.55442	4.53279	4.40459	4.69925	4.54809	4.83905	4.5757	4.52993	4.91846	4.79301
	---	16929436	1.234	0.016	0.433	1.118	0.226	0.694	0.959	0.549	0.836	chr22	+	32979286	32980190	14	4.83625	4.69269	4.7818	4.62691	4.71774	4.50802	4.64837	4.90019	4.48803	4.47153	4.85826	4.70729
	---	16733784	1.234	0.018	0.448	0.968	0.586	0.882	0.839	0.043	0.364	chr11	+	134820602	134821462	23	4.24855	4.0236	3.869	3.89633	4.01515	4.08503	4.04292	3.96277	3.82509	3.77629	4.02258	4.18549
DPY19L2P3	NR_036482	17044701	1.234	0.031	0.481	0.986	0.811	0.952	0.958	0.731	0.914	chr7	+	29724770	29782022	15	4.53923	4.92747	4.85177	4.49049	4.86258	4.75243	4.82202	4.75056	4.54878	4.44725	4.68838	4.91372
ZNF804B	ENST00000333190	17048048	1.234	0.037	0.496	1.251	0.024	0.407	0.93	0.525	0.824	chr7	+	88388682	88966346	21	5.38071	5.15049	4.9595	5.36244	5.02995	5.16633	5.30154	5.54104	5.14202	5.1043	5.29259	5.5588
	---	17055888	1.234	0.05	0.519	0.977	0.773	0.94	0.933	0.296	0.683	chr7	-	23719814	23720405	22	5.99365	5.87047	5.89076	5.77376	6.51417	6.56404	6.64613	6.36495	5.56992	5.74119	5.82571	6.09064
C7orf10	ENST00000309930	17045425	1.234	0.076	0.548	0.915	0.164	0.644	1.113	0.137	0.532	chr7	+	40174575	40900366	20	6.58252	6.75227	6.86038	6.78471	8.03808	7.98557	7.84541	7.92272	5.87299	6.16704	6.451	6.19529
	---	16676515	1.234	0.084	0.565	0.977	0.684	0.915	0.949	0.606	0.863	chr1	+	205685228	205719310	21	6.62785	6.75709	6.42413	6.80863	6.05538	6.07894	6.06765	5.99891	5.4222	5.07984	5.4403	5.66792
ZNF732	NM_001137608	16973296	1.234	0.091	0.572	1.081	0.262	0.717	0.981	0.748	0.92	chr4	-	264464	299110	12	3.6569	3.52637	3.58939	3.53846	3.38556	3.5457	3.54461	3.61084	3.65304	3.54594	4.10892	3.69589
FBXW4	NM_022039	16717733	1.234	0.106	0.591	0.869	0.457	0.827	1.232	0.193	0.593	chr10	-	103370421	103455110	10	6.08806	6.53465	6.37803	6.84626	7.60669	6.74388	6.93304	7.01191	6.15966	6.33599	6.76336	6.33818
STMN2	NM_001199214	17070249	1.234	0.107	0.591	0.999	0.982	0.997	0.838	0.043	0.365	chr8	+	80523049	80578410	18	4.44195	4.441	4.30212	4.06999	4.46894	4.43421	4.46338	4.43608	3.93739	4.15135	4.55206	4.14271
SPAG11A	NM_001081552	17065436	1.234	0.141	0.624	1.164	0.407	0.803	1.11	0.566	0.844	chr8	+	7705398	7726389	10	4.29767	3.79987	3.88401	4.5161	4.25766	3.97338	4.72503	3.94443	4.66694	4.22065	4.8945	4.59942
ZBTB8A	NM_001040441	16662123	1.233	0.009	0.403	1.025	0.689	0.916	1.023	0.668	0.89	chr1	+	33004772	33071542	23	9.79906	9.75256	9.78781	9.82986	10.1102	9.99708	10.1184	10.06	9.7786	9.76544	10.0529	10.0943
TMEM86A	ENST00000535380	16722667	1.233	0.01	0.403	0.934	0.462	0.83	1.037	0.724	0.912	chr11	+	18714669	18726332	20	5.94169	5.62715	5.96904	5.70426	6.6384	6.78321	6.45189	6.77318	6.6354	6.69439	6.97405	6.96004
LOC100132707	AK056609	17053850	1.233	0.012	0.411	0.875	0.05	0.478	1.191	0.017	0.275	chr7	+	154720208	154741618	20	6.84817	6.75798	7.06615	7.04493	8.45132	8.39613	8.20789	8.25405	7.84495	7.93235	8.16072	8.2203
	---	17069814	1.233	0.012	0.411	0.912	0.228	0.695	0.872	0.104	0.486	chr8	+	70270873	70306748	21	5.01962	4.95945	4.91268	4.67106	6.49055	6.27636	6.21706	6.28379	5.39577	5.29869	5.67251	5.62513
MAP1LC3A	ENST00000360668	16912954	1.233	0.013	0.416	1.16	0.122	0.595	0.877	0.18	0.579	chr20	+	33134658	33148149	21	4.91469	4.63042	4.68067	4.48458	4.76215	4.6395	4.76393	5.06636	4.37404	4.47628	4.75885	4.69544
	---	16877457	1.233	0.014	0.423	0.955	0.676	0.912	1.097	0.133	0.528	chr2	+	17349864	17351882	14	3.26117	3.19658	3.39745	3.32698	3.31897	3.58608	3.19149	3.57934	3.32967	3.22271	3.61533	3.54041
	---	17075545	1.233	0.016	0.432	1.183	0.03	0.424	0.908	0.158	0.556	chr8	-	23583844	23600555	16	7.13346	6.98817	6.88184	6.9606	6.86556	6.8606	7.17846	7.03407	6.74616	6.87544	7.1476	7.0774
FLJ31183	AK055745	17003610	1.233	0.016	0.433	0.941	0.486	0.839	0.932	0.255	0.651	chr5	-	178365678	178368084	22	4.04599	4.02255	3.86776	3.99667	4.22669	3.91763	4.01269	3.95817	3.93829	3.99446	4.33833	4.19913
STC1	NM_003155	17075553	1.233	0.024	0.464	1.019	0.759	0.937	1.051	0.441	0.779	chr8	-	23699428	23712320	21	4.006	3.86936	3.9607	4.05791	3.96293	4.01245	4.0699	3.95934	3.96226	4.08039	4.23915	4.40745
MAGEA4	NM_001011548	17107835	1.233	0.035	0.491	1.024	0.807	0.951	1.061	0.332	0.708	chrX	+	151080981	151093642	12	3.83837	3.72097	3.83224	3.89951	4.10586	4.08758	3.94051	4.32016	3.65507	3.83946	4.14241	3.95657
	---	16679961	1.233	0.04	0.5	1.451	0	0.088	1.084	0.383	0.744	chr1	-	736259	753092	11	5.00572	4.68023	5.01211	4.90694	5.01247	4.99408	5.50641	5.5741	4.69791	4.79751	4.91736	5.18121
HOXA-AS2	ENST00000517635	17044491	1.233	0.047	0.513	0.76	0.028	0.417	0.913	0.192	0.592	chr7	+	27147396	27173921	30	5.46267	5.28629	5.22718	5.26001	6.49174	6.89269	6.26014	6.33521	4.98925	5.26597	5.49302	5.36563
	---	17099039	1.233	0.048	0.517	1.062	0.36	0.778	0.852	0.108	0.493	chr9	-	132192931	132213701	12	7.32995	7.00268	6.97004	6.89983	7.04947	7.18803	7.24086	7.17113	7.25007	7.03061	7.55282	7.33254
LOC100289533	AK299698	16851601	1.233	0.057	0.529	1.021	0.72	0.925	1.3	0.006	0.198	chr18	+	21978415	21982646	22	3.59789	3.43898	3.93866	3.8538	3.48983	3.52467	3.50051	3.57408	3.65591	3.88974	4.19671	3.95361
PRR15L	NM_024320	16846157	1.233	0.067	0.539	0.697	0.023	0.4	0.974	0.647	0.881	chr17	-	46029333	46035110	18	5.48427	5.57029	5.5265	5.45246	7.68891	8.21295	7.33729	7.52177	5.38036	5.21194	5.43618	5.76099
GLIPR2	NM_022343	17084866	1.233	0.071	0.543	1.169	0.026	0.413	1.179	0.026	0.314	chr9	+	36136730	36163910	18	8.6405	8.70003	8.85574	8.95897	8.43622	8.41048	8.63156	8.6647	6.30603	6.53996	6.57841	6.87257
	---	16706710	1.233	0.098	0.581	0.897	0.088	0.549	1.015	0.799	0.939	chr10	+	85763088	85763235	12	3.50839	3.49599	3.59627	3.45231	3.43361	3.47398	3.28934	3.30471	3.41927	3.31011	3.8807	3.45354
OVOL2	ENST00000486776	16917531	1.233	0.121	0.607	1.038	0.694	0.917	1.171	0.11	0.496	chr20	-	17977205	17977396	18	5.43426	5.10744	5.52301	5.47485	6.69146	7.05454	6.97944	6.87496	5.51656	5.43027	6.01614	5.53419
	---	16790124	1.233	0.159	0.642	1.058	0.426	0.812	0.953	0.596	0.858	chr14	-	21338437	21341751	22	5.37647	5.1921	5.3605	5.0688	5.29688	5.30849	5.48577	5.28281	5.84442	5.28128	5.83177	5.89755
	---	17078523	1.233	0.185	0.66	0.921	0.532	0.861	1.028	0.67	0.89	chr8	-	81215192	81220555	9	3.34479	3.18417	3.26406	3.34447	3.50228	2.99279	3.26221	2.99561	3.19096	3.42422	3.8962	3.32315
NSD1	NM_172349	16992989	1.232	0.009	0.403	1.053	0.452	0.824	1.264	0.007	0.209	chr5	+	176560026	176727216	30	9.01994	9.10346	9.34252	9.45775	9.42435	9.24995	9.38596	9.43619	8.84281	8.79694	9.11911	9.12211
TRIM67	NM_001004342	16678691	1.232	0.01	0.404	1.103	0.131	0.606	0.996	0.958	0.99	chr1	+	231297858	231357314	30	6.124	5.93187	6.14817	5.89479	6.07534	6.0235	6.14888	6.23444	5.83656	5.82888	6.16901	6.09894
NUP210P1	ENST00000514993	16945025	1.232	0.021	0.457	1.113	0.124	0.597	0.87	0.234	0.631	chr3	+	126380924	126390782	17	5.88915	5.44567	5.4218	5.51053	4.94197	5.06504	5.19371	5.12114	5.29766	5.3978	5.57117	5.7263
	---	16972835	1.232	0.021	0.457	0.981	0.778	0.942	1.536	0.005	0.191	chr4	+	184908831	184909903	19	5.96003	6.26479	6.59027	6.87301	4.82763	4.85486	4.70968	4.91597	7.53211	7.54079	7.74444	7.93023
TOB2P1	NR_002936	17016528	1.232	0.022	0.462	1.028	0.649	0.903	1.184	0.228	0.624	chr6	-	28183116	28186707	15	6.06511	6.56479	6.42935	6.68938	6.75519	6.63532	6.75529	6.71614	7.90107	8.09506	8.28428	8.31453
	---	16774264	1.232	0.031	0.481	0.883	0.192	0.666	1.293	0.091	0.471	chr13	+	41707075	41810822	23	5.24568	5.42393	5.43489	5.9767	4.40994	4.19522	4.25524	3.99065	4.5282	4.31706	4.78272	4.66381
	---	16811670	1.232	0.037	0.496	1.027	0.763	0.938	1.082	0.472	0.797	chr15	-	74783299	74783372	15	3.6032	3.29736	3.40526	3.72412	3.30838	3.32461	3.19193	3.51625	3.44201	3.19151	3.66365	3.5719
FAM90A1	NM_018088	16760896	1.232	0.09	0.572	1.071	0.289	0.734	1.188	0.106	0.49	chr12	-	8373856	8380214	11	5.4997	5.71333	5.7063	6.00197	5.14068	5.27228	5.31192	5.29877	5.39235	4.97181	5.49849	5.46789
	---	16893800	1.232	0.187	0.662	0.992	0.902	0.975	0.886	0.399	0.754	chr2	-	740304	741130	22	4.40166	4.88824	4.6458	4.29688	5.0104	4.86227	4.99243	4.85585	4.2573	4.63202	4.99205	4.49907
CYTH2	NM_017457	16863799	1.231	0.011	0.408	1.04	0.54	0.864	0.969	0.545	0.834	chr19	+	48972289	48985571	16	7.03534	7.03673	6.9979	6.98291	7.03672	7.08877	7.18327	7.05389	6.91316	7.0055	7.25747	7.26205
IL3	ENST00000296870	16988964	1.231	0.017	0.442	0.875	0.133	0.609	1	0.998	0.999	chr5	+	131396222	131398897	21	4.24095	3.97771	4.28785	3.93157	4.37832	4.19202	4.20137	3.98401	4.17533	4.13866	4.53158	4.3817
LAMP3	NM_014398	16962022	1.231	0.02	0.457	1.094	0.254	0.711	1.746	0	0.065	chr3	-	182840001	182881627	30	5.84973	6.1356	6.76202	6.8318	8.21923	7.98991	8.27806	8.19086	7.5433	7.37509	7.728	7.79125
STX6	ENST00000258301	16696924	1.231	0.021	0.46	1.283	0.004	0.231	1.363	0.003	0.153	chr1	-	180913178	180992047	21	9.11344	9.05371	9.43954	9.62184	9.08773	9.02462	9.38998	9.44016	9.08097	9.03573	9.44865	9.26708
KLHL12	ENST00000435533	16698101	1.231	0.027	0.469	1.105	0.129	0.604	1.286	0.004	0.174	chr1	-	202860228	202897764	27	8.64165	8.59288	8.92638	9.03422	9.27569	9.21662	9.34508	9.43568	8.78185	8.63016	9.08434	8.9273
	---	16969550	1.231	0.032	0.481	1.048	0.539	0.863	0.947	0.455	0.787	chr4	+	108179857	108223027	19	3.1978	3.37705	3.27924	3.13897	3.29967	3.12644	3.19431	3.36571	3.15056	3.35407	3.62062	3.48485
	---	17072958	1.231	0.032	0.482	1.022	0.732	0.929	1.288	0.021	0.294	chr8	+	135844990	135846734	22	5.16387	5.4304	5.74276	5.58135	5.19932	5.06846	5.11469	5.21748	5.76255	5.79086	5.95508	6.19786
CER1	NM_005454	17092526	1.231	0.033	0.487	0.979	0.787	0.945	1.097	0.13	0.523	chr9	-	14719722	14722715	21	3.99602	3.96015	4.15015	4.07198	4.11532	4.37566	4.2695	4.159	4.02138	4.27206	4.45109	4.4419
HOTAIR	NR_003716	16765450	1.231	0.043	0.504	0.911	0.195	0.668	0.977	0.748	0.921	chr12	-	54350159	54368740	22	4.10092	4.00258	4.12155	3.91613	4.16491	4.34624	4.10454	4.13768	4.14644	4.10721	4.28377	4.56899
	---	16678919	1.23	0.01	0.403	1.012	0.916	0.978	1.022	0.8	0.94	chr1	+	234742754	234745229	23	6.74452	6.46758	6.7037	6.56975	7.30537	7.24704	7.535	7.05211	6.4903	6.45153	6.78576	6.75407
ZFPM1	ENST00000319555	16821794	1.23	0.01	0.404	1.2	0.018	0.376	1.049	0.476	0.8	chr16	+	88519725	88601574	23	7.67774	7.6251	7.81425	7.62749	7.55054	7.62618	7.88936	7.81365	6.84303	6.80755	7.1526	7.09515
HBP1	ENST00000485846	17050171	1.23	0.012	0.413	0.979	0.724	0.927	1.335	0.002	0.134	chr7	+	106809406	106842974	46	5.72978	5.76527	6.1134	6.2162	6.88441	6.80567	6.79652	6.83407	6.07605	6.00522	6.30152	6.37674
LOC388387	NR_027254	16845278	1.23	0.015	0.429	1.097	0.14	0.618	0.903	0.148	0.544	chr17	-	41026687	41050751	19	5.04662	4.88946	4.86258	4.77819	4.80867	4.84547	4.93018	4.99219	4.91862	5.01984	5.31213	5.22419
	---	16695931	1.23	0.018	0.449	1.224	0.072	0.521	0.97	0.687	0.898	chr1	-	166117019	166134332	16	5.6271	5.40176	5.41562	5.5262	5.46635	5.61533	6.01481	5.65029	5.50732	5.49289	5.71765	5.88115
LOC100506048	ENST00000467484	16975023	1.23	0.018	0.449	1.054	0.505	0.849	0.967	0.55	0.837	chr4	-	26861246	26862250	21	5.04403	5.13851	5.04679	5.03899	4.71957	4.98513	4.95152	4.90603	4.77902	4.87003	5.0558	5.1909
	---	17011624	1.23	0.021	0.457	0.865	0.046	0.471	1.276	0.023	0.3	chr6	+	110147725	110149988	22	5.55452	5.71475	5.85948	6.1135	5.80386	5.70231	5.57664	5.5124	5.8246	5.99977	6.2347	6.18764
	---	17089107	1.23	0.021	0.457	0.992	0.908	0.976	1.071	0.222	0.62	chr9	+	128172737	128184020	20	4.99314	4.97833	5.10886	5.06099	5.25577	5.38245	5.40773	5.20598	4.89151	4.71181	5.1147	5.08744
SIGLEC7	NM_014385	16864651	1.23	0.031	0.48	1.159	0.051	0.478	0.923	0.228	0.624	chr19	+	51645558	51656783	8	5.67621	5.63306	5.61595	5.46406	5.41416	5.51559	5.73634	5.61923	5.35878	5.46061	5.81575	5.60133
	---	16890707	1.23	0.038	0.497	0.984	0.809	0.952	1.032	0.766	0.927	chr2	+	218116279	218116598	20	4.8148	4.42913	4.58112	4.75259	4.7624	4.72527	4.80703	4.6345	4.7952	4.5596	5.04087	4.9115
TCAM1P	NR_002947	16837044	1.23	0.04	0.5	0.814	0.016	0.368	0.813	0.014	0.256	chr17	+	61934376	61941739	23	6.30231	6.36446	5.96299	6.10718	7.05418	7.22558	6.82309	6.86328	5.22575	4.9649	5.34711	5.44133
	---	16929734	1.23	0.041	0.5	0.99	0.876	0.969	0.825	0.02	0.288	chr22	+	37476108	37478887	22	5.51475	5.40188	5.24435	5.1162	5.36498	5.27418	5.25505	5.35624	5.06048	5.32946	5.45865	5.52874
	---	16888989	1.23	0.053	0.523	0.973	0.633	0.897	1.067	0.431	0.774	chr2	+	192711279	192901485	20	4.92956	4.64603	4.91066	4.85325	5.04544	5.10325	5.05244	5.01679	4.45492	4.68337	4.98052	4.75578
	---	16970740	1.23	0.095	0.577	1.105	0.114	0.588	0.903	0.124	0.516	chr4	+	132301168	132462552	19	3.46418	3.57029	3.32553	3.41428	3.28576	3.32131	3.42442	3.47064	3.48242	3.61994	4.05278	3.64752
DACT2	NM_214462	17025805	1.23	0.105	0.59	1.122	0.121	0.595	1.075	0.327	0.706	chr6	-	168693512	168720434	15	5.01883	4.81014	4.9718	5.06746	4.63938	4.81944	4.87348	4.91823	4.63747	4.97203	4.95267	5.25456
	---	16661782	1.229	0.01	0.403	0.993	0.93	0.983	0.938	0.433	0.775	chr1	+	30613110	30614454	19	4.78816	4.82296	4.85357	4.57265	4.91936	5.00962	5.07218	4.83777	4.8892	4.91728	5.18827	5.21379
A1BG	NM_130786	16876116	1.229	0.01	0.403	1.103	0.132	0.609	0.937	0.405	0.758	chr19	-	58858172	58864865	21	5.96581	5.98748	6.01285	5.75198	6.01734	5.91631	6.11603	6.10114	5.70711	5.72562	5.99536	6.0322
KRT18P55	NR_028334	16842572	1.229	0.012	0.413	1.045	0.441	0.818	1.032	0.685	0.897	chr17	-	26603012	26634408	16	5.2452	5.47711	5.34465	5.46727	5.30683	5.30224	5.34927	5.38742	5.34783	5.42384	5.71636	5.64973
	---	17127177	1.229	0.017	0.443	0.951	0.397	0.799	0.915	0.29	0.678	---	---	---	---	20	5.58973	5.31421	5.35745	5.2903	5.34837	5.37713	5.25227	5.32765	5.01878	5.137	5.32622	5.42527
PHLDB3	NM_198850	16872990	1.229	0.019	0.453	1.183	0.019	0.379	1.241	0.01	0.236	chr19	-	43979255	44009087	24	6.72446	6.65151	6.93842	7.0615	7.11259	7.08073	7.34872	7.33139	7.06194	7.20831	7.47314	7.39348
	---	16983581	1.229	0.019	0.456	1.117	0.109	0.581	1.117	0.199	0.6	chr5	+	24554127	24613331	22	5.23512	5.01759	5.37707	5.19464	5.15268	5.25709	5.40609	5.32301	5.21157	5.28302	5.62216	5.46745
ABHD3	NM_138340	16854202	1.229	0.02	0.457	1.014	0.824	0.955	1.1	0.126	0.519	chr18	-	19230858	19284766	21	9.84549	9.89188	9.96142	10.0515	8.86809	8.7632	8.78933	8.88198	9.89433	9.71799	10.1041	10.1024
	---	16902902	1.229	0.024	0.464	1.051	0.486	0.839	0.975	0.635	0.875	chr2	-	132722304	132737446	13	3.23667	3.30722	3.236	3.23394	3.0706	2.99557	3.00456	3.20652	2.90966	3.10176	3.28089	3.32399
	---	16803417	1.229	0.026	0.469	1.098	0.192	0.666	0.997	0.975	0.994	chr15	+	77991686	77992117	12	4.85997	4.93187	4.73576	5.04848	4.77265	4.62703	4.88834	4.78075	4.55453	4.75855	4.98313	4.92559
	---	16740406	1.229	0.031	0.481	1.207	0.012	0.339	1.151	0.039	0.355	chr11	-	65266414	65278498	25	7.35454	7.25878	7.50594	7.51357	7.24466	7.2013	7.48617	7.50238	7.04454	7.27779	7.44271	7.47335
FAM47A	NM_203408	17110032	1.229	0.038	0.497	0.925	0.639	0.899	1.037	0.628	0.872	chrX	-	34147869	34150447	11	5.44814	5.57703	5.67118	5.45858	5.10518	5.79579	5.49503	5.18175	5.32852	5.26911	5.46762	5.72321
PLEKHA6	NM_014935	16698312	1.229	0.044	0.506	0.929	0.239	0.702	1.131	0.09	0.469	chr1	-	204187981	204329044	22	6.26199	6.43438	6.53394	6.51863	6.82584	6.81688	6.664	6.76544	6.94948	7.18457	7.2807	7.44705
	---	17064097	1.229	0.051	0.519	1.149	0.054	0.487	0.921	0.22	0.617	chr7	-	148240641	148265340	24	3.71618	3.85738	3.71118	3.62512	3.73863	3.86434	3.99377	4.01082	3.85159	4.02365	4.3623	4.10604
	---	16804048	1.229	0.056	0.528	1.18	0.033	0.436	0.933	0.395	0.751	chr15	+	83511246	83514392	19	4.71824	4.70793	4.75211	4.47464	4.97728	4.82445	5.14089	5.13956	4.70554	4.45317	4.77492	4.97707
	---	17077648	1.229	0.057	0.529	1.013	0.835	0.957	1.001	0.992	0.998	chr8	-	62671653	62678528	21	3.85889	4.1149	3.97015	4.00592	3.77013	3.90365	3.82281	3.88896	3.62292	3.95029	4.08027	4.08728
	---	16963511	1.229	0.057	0.53	0.976	0.766	0.938	0.891	0.13	0.523	chr3	-	197171932	197185194	24	5.05205	4.97648	4.74789	4.94586	4.75419	4.85074	4.90438	4.63084	4.81811	4.90267	5.31801	4.99822
PWRN2	NR_026647	16806109	1.229	0.059	0.531	1.168	0.156	0.634	0.87	0.052	0.391	chr15	-	24407906	24415095	17	4.29826	4.43648	4.15071	4.18214	4.14858	3.76074	4.11334	4.24305	4.12351	4.39385	4.65256	4.45838
	---	16812886	1.229	0.069	0.541	1.12	0.139	0.618	1.252	0.015	0.263	chr15	-	86287340	86293512	21	6.01832	5.99164	6.22559	6.43303	5.88037	6.08023	6.11376	6.17438	6.22499	6.06239	6.60163	6.27913
	---	16755950	1.229	0.082	0.56	0.971	0.685	0.915	1.081	0.59	0.856	chr12	+	102707354	102709939	9	3.91622	4.03691	3.78236	4.397	4.07041	3.87684	3.86342	3.99758	3.7974	3.5418	3.81629	4.11841
	---	16973149	1.229	0.084	0.563	0.918	0.321	0.755	0.725	0.01	0.239	chr4	+	188593133	188596555	11	5.03311	4.75692	4.53238	4.33031	4.82484	4.66213	4.74563	4.49591	4.90694	4.65023	4.92294	5.23076
	---	17025703	1.229	0.098	0.582	1.152	0.2	0.673	1.022	0.73	0.914	chr6	-	167647448	167655400	14	4.62748	4.49079	4.54205	4.63886	4.38399	4.781	4.71049	4.86265	4.48568	4.51217	5.0122	4.58083
CCT6P1	NR_003110	17046573	1.229	0.11	0.595	1.184	0.046	0.471	1.31	0.056	0.399	chr7	+	65216092	65228662	9	7.66349	7.88495	7.94199	8.38603	7.98598	8.01309	8.13508	8.35244	8.30167	8.75016	8.87046	8.77633
JPH2	NM_020433	16919399	1.229	0.125	0.609	1.132	0.065	0.511	0.972	0.643	0.879	chr20	-	42740335	42816218	19	5.06215	5.21892	5.08843	5.10967	5.205	5.22975	5.43368	5.35876	5.04293	5.17869	5.64202	5.17328
	---	17127701	1.229	0.13	0.613	1.053	0.733	0.93	1.057	0.65	0.882	---	---	---	---	11	5.13539	4.86001	4.86105	5.2946	4.87116	5.54607	5.24282	5.32169	5.11541	5.28625	5.73131	5.26343
	---	16705354	1.229	0.16	0.642	1.203	0.015	0.359	0.895	0.415	0.764	chr10	+	69917836	69918165	14	5.06169	4.58379	4.50933	4.81602	4.5993	4.64257	4.92239	4.85257	4.65141	5.20968	5.21966	5.23675
GJC3	AF503615	17060376	1.229	0.174	0.653	1.031	0.736	0.93	1.027	0.667	0.889	chr7	-	99520892	99527243	16	5.58604	5.69673	5.73683	5.62302	5.20923	5.53225	5.47703	5.35204	5.22454	5.81277	5.80685	5.82726
	---	17082241	1.229	0.238	0.7	1.205	0.027	0.414	0.825	0.044	0.369	chr8	-	144791177	144796371	16	4.20533	4.08848	3.74524	3.99424	4.2181	4.40233	4.5589	4.59967	3.64578	4.22534	4.43349	4.03067
KRT17P1	ENST00000399211	16841817	1.229	0.3	0.742	0.908	0.244	0.706	1.046	0.856	0.959	chr17	-	16744057	16749197	8	3.92334	3.5551	3.26657	4.34213	4.07743	3.80602	3.8152	3.78914	3.95829	4.12132	3.92788	4.74792
	---	16936531	1.229	0.661	0.902	1.048	0.539	0.863	0.686	0	0.064	chr22	-	50775556	50778197	12	6.21818	6.2824	5.68233	5.73282	7.04262	7.15543	7.05834	7.27358	6.90093	4.86039	5.84848	6.50963
LOC100131132	AK125684	16706403	1.228	0.011	0.408	1.064	0.292	0.736	0.862	0.026	0.314	chr10	+	79626633	79629368	24	4.65041	4.64594	4.41412	4.45283	4.49861	4.47716	4.60263	4.55318	4.42603	4.43703	4.69057	4.76451
IGLV10-54	ENST00000390287	16927708	1.228	0.014	0.423	1.071	0.367	0.783	0.841	0.017	0.275	chr22	+	22569184	22569660	19	6.69015	6.6512	6.45657	6.38612	6.39886	6.63729	6.60895	6.62564	6.61018	6.70841	6.9225	6.98807
	---	16944495	1.228	0.016	0.432	1.001	0.983	0.997	1.12	0.216	0.615	chr3	+	120005001	120008319	19	3.54304	3.5943	3.89039	3.57537	3.95501	3.95409	3.99665	3.91606	3.61779	3.74745	3.99849	3.95932
	---	16662333	1.228	0.016	0.433	1.121	0.217	0.687	0.871	0.058	0.403	chr1	+	35316295	35317156	23	4.88448	4.7397	4.58495	4.64023	4.94105	4.88478	4.91677	5.23821	5.01732	4.93092	5.21593	5.32352
TGFA	NM_003236	16898788	1.228	0.016	0.438	1.056	0.418	0.809	1.528	0	0.065	chr2	-	70674412	70781325	22	8.08854	8.08196	8.61688	8.77717	7.29618	7.42817	7.48951	7.39039	7.5935	7.52283	7.79269	7.91494
	---	16775879	1.228	0.017	0.443	0.898	0.251	0.709	0.927	0.348	0.72	chr13	+	97798987	97799773	20	4.96812	5.21847	5.03151	4.938	4.8211	4.77609	4.81165	4.47485	4.49336	4.36232	4.68784	4.75884
	---	16660884	1.228	0.02	0.457	1.035	0.652	0.904	0.86	0.057	0.401	chr1	+	25367664	25373839	19	5.22736	5.05149	4.96577	4.87649	5.18822	5.154	5.34533	5.09587	4.82528	4.98857	5.22928	5.17579
NTM	NM_016522	16733553	1.228	0.022	0.46	0.921	0.4	0.8	0.91	0.198	0.599	chr11	+	131240371	132207115	29	5.08396	5.00332	5.00265	4.8124	5.28016	4.97743	5.1225	4.89867	4.73776	4.66281	5.0805	4.9128
	---	16860134	1.228	0.03	0.477	1.023	0.799	0.949	0.916	0.284	0.674	chr19	+	20655812	20657239	11	3.90215	3.74973	3.81076	3.58932	3.77883	3.71266	3.95012	3.60759	3.86499	3.65057	4.01515	4.09247
CCDC144A	AB011137	16831486	1.228	0.041	0.5	0.99	0.892	0.972	1.234	0.103	0.485	chr17	+	16592851	16681195	8	4.66402	4.66231	4.73059	5.20255	4.8597	4.86342	4.73527	4.95963	4.98204	4.77365	5.08468	5.26219
LOC100192426	NR_024419	16853799	1.228	0.042	0.502	0.993	0.9	0.974	0.89	0.263	0.657	chr18	-	8360818	8367032	23	5.61395	5.32529	5.16896	5.43329	5.40665	5.37464	5.3431	5.41721	5.36392	5.23182	5.47088	5.71589
OVOS2	BC046190	16762887	1.228	0.045	0.507	0.943	0.312	0.75	1.135	0.098	0.48	chr12	-	31264592	31265970	12	4.11587	4.14242	4.41291	4.21206	4.22683	4.20293	4.14267	4.11697	4.05112	4.05896	4.20641	4.49627
RBM38	NM_017495	16915173	1.228	0.048	0.515	1.333	0.002	0.174	1.274	0.003	0.162	chr20	+	55966454	55984389	14	8.05721	8.01043	8.39902	8.36707	7.93471	7.89428	8.29163	8.36641	8.54872	8.27428	8.65025	8.76547
LOC100289488	ENST00000419190	16697981	1.228	0.075	0.548	0.976	0.813	0.953	1.006	0.947	0.986	chr1	-	201969179	201979481	19	5.84145	5.84569	6.04999	5.65608	5.18469	5.50404	5.44959	5.16888	4.35016	4.59423	4.6264	4.909
CYP2D6	X16866	16935577	1.228	0.093	0.575	1.056	0.36	0.778	1.076	0.323	0.704	chr22	-	42532442	42535938	24	5.01012	4.96538	5.2062	4.98135	5.14189	5.11616	5.24044	5.17433	5.05102	4.90335	5.468	5.07756
	---	17023994	1.228	0.094	0.576	0.948	0.425	0.812	1.097	0.288	0.677	chr6	-	136415853	136546733	18	3.79117	3.62443	3.96656	3.71544	3.90605	3.74642	3.71779	3.77994	4.6636	4.55701	5.11065	4.70275
	---	16710656	1.228	0.126	0.61	1.247	0.011	0.334	1.018	0.786	0.935	chr10	+	132011022	132050307	19	5.4501	5.26209	5.39004	5.37336	5.33368	5.16732	5.55824	5.57947	5.13945	5.27256	5.73623	5.26712
GH2	NM_002059	16847676	1.228	0.129	0.612	1.161	0.067	0.514	0.775	0.006	0.198	chr17	-	61957572	61959295	8	7.28337	7.20411	6.80451	6.94967	6.59051	6.76633	6.95285	6.83375	6.7245	7.11019	7.36932	7.05781
APOC1	NM_001645	16863124	1.228	0.142	0.624	1.017	0.862	0.964	0.687	0.006	0.201	chr19	+	45417921	45422606	11	5.67438	5.37738	5.09021	4.87915	6.30788	6.04683	6.0684	6.33334	6.25212	5.78329	6.42541	6.2016
	---	16663851	1.228	0.234	0.698	0.986	0.817	0.953	0.982	0.787	0.935	chr1	+	44509600	44570647	26	5.46667	5.32804	5.44062	5.30226	5.28793	5.22498	5.28758	5.18475	4.86037	5.16451	5.62327	4.99416
	---	17084479	1.227	0.01	0.404	1.137	0.224	0.692	1.027	0.736	0.916	chr9	+	34478620	34478903	16	3.25731	3.53123	3.42967	3.43495	3.11483	3.4479	3.35411	3.57791	3.31427	3.29128	3.61089	3.58394
	---	16783708	1.227	0.012	0.413	0.871	0.124	0.597	1.001	0.989	0.997	chr14	+	39901834	39982984	23	4.8824	4.98638	4.86361	5.00765	5.3599	5.10205	4.96352	5.09869	4.81121	4.76711	5.12745	5.04164
RGS9	NM_003835	16837101	1.227	0.019	0.454	1.004	0.945	0.987	0.987	0.862	0.961	chr17	+	63133456	63223821	35	6.06118	6.31925	6.18078	6.16168	6.35054	6.2528	6.34675	6.26883	5.85367	6.01733	6.21922	6.24262
AQP1	NM_198098	17044862	1.227	0.021	0.46	1.11	0.174	0.654	0.893	0.217	0.615	chr7	+	30951415	30965131	21	6.50476	6.52203	6.509	6.19037	6.22193	6.36353	6.36133	6.52437	6.14233	6.22583	6.55821	6.39948
SLC12A4	NM_005072	16827502	1.227	0.024	0.464	1.501	0	0.06	1.47	0	0.062	chr16	-	67977377	68002597	18	8.33317	8.41619	8.95021	8.91146	8.93384	8.99554	9.5595	9.5428	9.49932	9.62672	9.93234	9.78341
	---	17093439	1.227	0.025	0.464	1.007	0.922	0.98	1.151	0.095	0.476	chr9	-	34389941	34390049	14	3.18011	3.01896	3.39642	3.2093	3.09213	3.25422	3.25958	3.10706	3.03008	2.84453	3.27243	3.19284
TRIQK	NM_001171796	17079114	1.227	0.026	0.469	1.084	0.18	0.659	1.067	0.248	0.643	chr8	-	93895758	94029901	25	6.21934	6.16885	6.2779	6.29726	6.01531	6.03807	6.15663	6.13008	5.98504	5.94131	6.15637	6.36038
	---	16683951	1.227	0.032	0.481	1.053	0.426	0.813	0.864	0.07	0.429	chr1	-	27555597	27560974	15	6.19298	5.99948	5.83988	5.93029	5.81064	5.70583	5.88158	5.78263	6.13086	6.05659	6.5003	6.27706
	---	16887558	1.227	0.032	0.481	1.31	0.011	0.33	1.085	0.478	0.8	chr2	+	172167776	172170351	20	4.01164	4.22502	4.44563	4.02738	3.83439	4.0959	4.39812	4.31192	3.85423	4.08489	4.28439	4.24431
	---	17116818	1.227	0.032	0.481	1.15	0.065	0.512	1.101	0.15	0.548	chrY	-	7192338	7192636	24	3.84597	3.77616	3.88316	4.01681	3.89044	3.72945	4.04259	3.98216	4.26388	4.10472	4.39269	4.56563
	---	17058104	1.227	0.09	0.571	0.891	0.304	0.744	0.851	0.03	0.328	chr7	-	63348578	63359219	17	6.12103	6.03053	5.79467	5.89071	5.84277	6.2838	5.85396	5.94101	5.88489	5.50382	5.91702	6.06086
	---	17002871	1.227	0.198	0.67	1.209	0.257	0.713	1.044	0.809	0.944	chr5	-	172447231	172461895	24	6.41556	5.61871	6.05194	6.10709	6.50953	6.00116	6.792	6.26691	6.80808	6.87167	6.82388	7.44663
KRTAP24-1	NM_001085455	16924797	1.226	0.01	0.404	0.999	0.989	0.998	1.025	0.702	0.903	chr21	-	31653192	31655276	22	3.37721	3.20283	3.35773	3.2943	3.43197	3.33407	3.45072	3.31284	3.35941	3.31335	3.64093	3.61959
CTF1	NM_001330	16818064	1.226	0.011	0.408	1.137	0.088	0.548	1.18	0.045	0.372	chr16	+	30907928	30914881	20	7.11443	7.04945	7.22278	7.41819	6.78372	6.61216	6.86239	6.90335	7.53264	7.51907	7.78354	7.8571
CAPSL	NM_144647	16995214	1.226	0.012	0.409	1.093	0.19	0.665	0.827	0.037	0.35	chr5	-	35904397	35938881	20	3.96339	3.73268	3.53084	3.61648	3.53446	3.67855	3.72051	3.74891	3.71773	3.66452	4.01174	3.95797
TGM1	NM_000359	16791219	1.226	0.012	0.411	1.327	0.007	0.292	1.087	0.149	0.547	chr14	-	24718320	24733638	35	6.27921	6.33235	6.43372	6.41987	6.00378	5.93777	6.25811	6.4988	6.24438	6.32129	6.59501	6.55848
RAB33B	NM_031296	16970896	1.226	0.013	0.416	1.145	0.061	0.501	1.204	0.012	0.249	chr4	+	140374386	140397763	21	7.53244	7.51705	7.75762	7.82884	8.12331	8.06144	8.22841	8.34724	7.52988	7.51508	7.86764	7.76573
SNORD116-28	NR_003361	16798166	1.226	0.015	0.429	1.017	0.837	0.958	0.948	0.722	0.911	chr15	+	25326301	25359074	16	4.04085	4.60865	4.08272	4.41221	4.13519	4.34107	4.37414	4.15146	4.40869	4.38565	4.75162	4.63164
TRIM32	NM_012210	17088511	1.226	0.016	0.432	1.302	0.003	0.213	1.497	0	0.061	chr9	+	119449581	119463579	20	9.08374	9.18207	9.68431	9.74628	8.78353	8.74744	9.19273	9.09995	9.49368	9.41278	9.69562	9.79815
ANKRD37	ENST00000335174	16972950	1.226	0.016	0.433	0.983	0.797	0.948	1.17	0.028	0.322	chr4	+	186317175	186321782	27	5.84708	5.94941	6.11295	6.13645	6.11376	6.28998	6.20023	6.15402	6.09789	6.11989	6.46798	6.33757
JUND	NM_005354	16870384	1.226	0.017	0.44	1.137	0.152	0.629	1.227	0.007	0.21	chr19	-	18390563	18392432	20	8.66777	8.64627	8.97247	8.93203	7.65741	7.52848	7.64519	7.90995	7.93426	7.82621	8.12939	8.21847
GOLGA2	NM_004486	17098808	1.226	0.021	0.457	0.973	0.622	0.895	1.074	0.199	0.6	chr9	-	131018108	131038274	15	9.0259	9.03243	9.14256	9.12231	9.27177	9.24857	9.19761	9.24175	9.68095	9.51456	9.91489	9.8678
MAT1A	NM_000429	16716063	1.226	0.029	0.477	0.942	0.313	0.75	1.142	0.049	0.381	chr10	-	82031576	82049440	25	5.73126	5.80493	5.99133	5.92697	6.12348	6.10242	6.0506	6.00387	5.3135	5.10896	5.54679	5.46379
PDE6H	NM_006205	16748695	1.226	0.03	0.477	1.026	0.671	0.91	0.988	0.823	0.948	chr12	+	15125956	15134799	26	3.77619	3.76396	3.72836	3.77782	3.80124	3.75143	3.76338	3.86315	3.606	3.81143	4.04884	3.95749
KCTD11	NM_001002914	16830398	1.226	0.029	0.477	0.984	0.769	0.939	1.444	0.002	0.12	chr17	+	7255208	7258263	21	6.82434	7.03033	7.45379	7.46065	7.67992	7.69083	7.64544	7.67774	7.30975	7.15397	7.44669	7.60561
MYOM2	NM_003970	17065226	1.226	0.052	0.52	0.965	0.539	0.863	1.095	0.179	0.577	chr8	+	1993155	2113475	38	5.14846	4.98548	5.20101	5.19544	5.58842	5.61315	5.53281	5.56772	4.82454	5.00537	5.33359	5.08527
LRRN2	NM_006338	16698407	1.226	0.073	0.547	0.868	0.039	0.452	0.776	0.017	0.275	chr1	-	204586298	204654861	22	6.51818	6.40583	5.96746	6.22613	5.86764	5.81158	5.64873	5.6195	5.41538	5.12592	5.67818	5.452
MIR378H	NR_039667	16991418	1.226	0.081	0.557	1.153	0.339	0.768	1.083	0.433	0.775	chr5	+	154209018	154209100	10	5.01046	4.87089	4.87127	5.2401	4.88121	4.69916	5.30808	4.68346	4.59143	4.92192	5.15058	4.951
SCAND2	NR_004859	16804228	1.226	0.122	0.607	1.203	0.019	0.379	1.389	0.002	0.129	chr15	+	85174691	85185694	13	6.60972	6.77926	7.1717	7.16622	7.00027	7.07354	7.25015	7.3568	6.98958	7.4424	7.43598	7.58403
	---	16714528	1.226	0.16	0.642	0.968	0.617	0.893	0.947	0.357	0.727	chr10	-	58867073	58868602	10	3.63218	3.51845	3.47883	3.5135	3.27605	3.31136	3.32272	3.17162	3.20418	3.60292	3.88842	3.50708
SMEK1	ENST00000554684	16795878	1.225	0.011	0.408	1.321	0.002	0.177	1.349	0.001	0.111	chr14	-	91923955	91976898	17	9.47477	9.43169	9.85937	9.91135	9.88779	9.82043	10.2552	10.2574	9.55829	9.627	9.89184	9.87901
WBSCR28	NM_182504	17046993	1.225	0.019	0.453	0.935	0.302	0.743	1.181	0.073	0.438	chr7	+	73275489	73280223	23	5.20271	5.45172	5.63436	5.50069	5.90101	5.99551	5.90481	5.79672	5.00066	4.9259	5.18561	5.32759
	---	16811181	1.225	0.023	0.462	1.006	0.936	0.985	0.886	0.084	0.458	chr15	-	70113095	70115195	21	5.59234	5.5903	5.34086	5.49193	5.60753	5.52974	5.69785	5.45695	5.50978	5.34533	5.76267	5.67933
	---	17127395	1.225	0.025	0.464	1.056	0.427	0.813	0.874	0.045	0.372	---	---	---	---	25	4.24199	4.16334	4.03617	3.97928	4.04565	4.23106	4.20614	4.22886	4.1578	4.12893	4.33829	4.53351
	---	16897489	1.225	0.039	0.498	0.823	0.038	0.449	0.922	0.318	0.7	chr2	-	51429219	51448902	16	4.12101	3.87711	3.82074	3.94248	4.16988	3.90381	3.74424	3.76693	3.71534	3.8628	3.97349	4.19164
LOC646034	AK125175	16703747	1.225	0.041	0.5	0.868	0.067	0.514	1.028	0.605	0.863	chr10	+	31893292	31895146	17	3.85527	3.78759	3.87564	3.84813	4.05024	3.87445	3.78466	3.73119	3.61591	3.65523	4.06113	3.79534
	---	16808735	1.225	0.058	0.53	0.931	0.338	0.767	1.068	0.423	0.769	chr15	-	48095581	48138433	22	4.11707	3.84444	4.11805	4.03348	4.01656	4.08198	4.05316	3.83934	3.8127	4.13077	4.23596	4.2933
RN5S491	ENST00000362936	16922634	1.225	0.067	0.539	1.122	0.076	0.529	0.875	0.067	0.423	chr21	+	38224211	38224328	15	5.13344	5.01527	4.8285	4.93586	5.02646	5.0524	5.18102	5.22975	5.22159	5.322	5.73269	5.39733
	---	16841163	1.225	0.076	0.548	0.96	0.48	0.837	0.965	0.635	0.875	chr17	-	10178300	10182496	24	4.80925	4.65919	4.57682	4.78709	4.92825	4.93488	4.84538	4.90014	4.78016	4.94828	4.99188	5.32213
TRAJ40	ENST00000390497	16782044	1.225	0.091	0.572	1.054	0.376	0.787	1.018	0.748	0.921	chr14	+	22968672	22968732	8	2.74979	2.75037	2.72999	2.82126	2.69393	2.74806	2.7692	2.82493	2.99316	2.70365	2.9979	3.28489
	---	16987280	1.225	0.101	0.587	0.882	0.155	0.633	1.04	0.501	0.812	chr5	+	92906435	92910714	22	4.49196	4.58195	4.62477	4.56113	4.64664	4.88759	4.66588	4.50642	4.33107	4.7489	4.78176	4.88337
	---	17001149	1.225	0.11	0.595	0.835	0.07	0.52	0.817	0.018	0.279	chr5	-	144602173	144608545	16	4.79797	4.62377	4.44275	4.39681	4.59511	4.92137	4.51006	4.48369	4.1796	4.58971	4.76947	4.58609
RN5S269	ENST00000459032	17069809	1.225	0.124	0.609	0.99	0.864	0.965	0.955	0.534	0.828	chr8	+	69607878	69608014	17	2.9939	3.22684	3.02141	3.06749	3.10873	3.06575	3.06344	3.08318	3.12475	3.20762	3.22423	3.69495
HMOX1	ENST00000216117	16929562	1.224	0.011	0.408	1.183	0.019	0.379	1.073	0.217	0.615	chr22	+	35776354	35790207	20	8.23855	8.18282	8.31744	8.30612	7.58776	7.61035	7.83311	7.84957	8.89117	8.92779	9.2181	9.18402
LOC389906	NR_034031	17108843	1.224	0.017	0.44	1.518	0.001	0.115	1.478	0.031	0.331	chrX	-	3734598	3761935	14	6.531	6.73535	7.49103	6.90244	6.89025	7.10735	7.60414	7.59699	7.83295	7.70583	8.03817	8.08397
	---	16818703	1.224	0.017	0.442	0.964	0.628	0.896	1.008	0.872	0.964	chr16	+	49151037	49154982	13	4.01751	3.98286	4.03691	3.98812	4.14436	3.90332	3.98943	3.95315	3.91726	3.92708	4.28355	4.14461
PPAPDC3	NM_032728	17090517	1.224	0.021	0.457	1.036	0.567	0.874	0.971	0.656	0.884	chr9	+	134165081	134184649	23	6.10249	6.28179	6.17779	6.12198	6.21716	6.23041	6.21368	6.33579	6.25184	6.08164	6.45486	6.46296
	---	16999122	1.224	0.021	0.458	0.973	0.669	0.91	1.089	0.343	0.717	chr5	-	116156689	116165883	18	4.14644	3.93806	4.04264	4.28703	4.16428	4.19001	4.21335	4.06192	4.07369	4.23545	4.47377	4.41937
SIGLEC14	NM_001098612	16874922	1.224	0.03	0.479	1.084	0.182	0.661	1.058	0.405	0.758	chr19	-	52145806	52150151	17	4.75355	4.56833	4.76371	4.72058	4.54107	4.5512	4.67897	4.64571	4.66071	4.70545	4.86548	5.08551
	---	16704347	1.224	0.037	0.497	1.046	0.486	0.839	1.008	0.871	0.964	chr10	+	45472442	45474257	24	5.30466	5.30197	5.29308	5.33799	5.51056	5.35817	5.49571	5.50347	5.45788	5.63238	5.74516	5.92896
TMEM151A	NM_153266	16727377	1.224	0.038	0.497	1.127	0.31	0.749	0.943	0.399	0.754	chr11	+	66059341	66064135	20	6.35025	6.2022	6.11898	6.26315	5.30763	4.94248	5.45277	5.14094	4.92365	5.16254	5.29037	5.37967
	---	16764016	1.224	0.043	0.504	0.971	0.75	0.935	0.944	0.346	0.719	chr12	-	49194956	49204315	20	3.65472	3.54353	3.55236	3.47966	3.80034	3.67723	3.52196	3.86961	3.49635	3.46297	3.63558	3.90799
TNFRSF10C	ENST00000356864	17066815	1.224	0.065	0.539	1.149	0.244	0.706	3.883	0	0.039	chr8	+	22941868	22990110	18	6.04936	6.13915	8.40955	7.6927	5.39519	5.69652	5.55784	5.9367	5.30704	5.64917	5.77264	5.76743
	---	17083729	1.224	0.079	0.553	1.012	0.875	0.968	0.988	0.884	0.967	chr9	+	16473186	16476235	23	3.53938	3.81757	3.63188	3.69151	3.78846	3.58739	3.76643	3.64269	3.49379	3.86638	3.99562	3.9477
RAB25	NM_020387	16671901	1.224	0.08	0.554	1.002	0.968	0.994	1.01	0.862	0.96	chr1	+	156030951	156040295	22	9.08656	9.16137	9.13487	9.14012	9.59918	9.58801	9.56137	9.63237	4.37217	4.38484	4.4809	4.86016
NMS	NM_001011717	16883468	1.224	0.084	0.565	1.054	0.501	0.848	0.902	0.182	0.58	chr2	+	101086944	101099742	25	4.72943	4.5292	4.53567	4.42524	4.552	4.77565	4.66904	4.8115	4.45025	4.67359	5.01319	4.69421
	---	16858003	1.224	0.153	0.636	0.975	0.81	0.952	0.744	0.017	0.275	chr19	+	9649409	9650405	15	5.86811	5.74778	5.21228	5.55156	8.46066	8.87893	8.66692	8.60142	5.57766	5.12134	5.50274	5.78034
	---	17074071	1.224	0.175	0.654	1.148	0.299	0.741	1.054	0.528	0.826	chr8	-	1196789	1198760	11	5.81442	5.63241	5.91564	5.68233	5.93078	5.45846	6.04331	5.74331	5.37608	5.95219	5.95343	5.95903
IGLV3-10	ENST00000390315	16927824	1.224	0.179	0.657	0.877	0.202	0.675	0.865	0.032	0.334	chr22	+	23154244	23154782	8	5.88072	5.87262	5.70545	5.62834	5.70681	5.51764	5.25428	5.59084	5.43858	5.24859	5.91059	5.36016
ANKRD20A2	NM_001012421	17085196	1.224	0.255	0.713	1.032	0.617	0.893	1.212	0.021	0.294	chr9	+	42368303	42411410	42	4.10261	3.98072	4.38352	4.25409	4.066	4.08638	4.18918	4.05373	3.44718	4.16844	4.05566	4.14362
PVT1	M34429	17072678	1.223	0.01	0.404	1.579	0.001	0.115	1.4	0.001	0.085	chr8	+	128806779	129113503	42	7.33036	7.36942	7.81245	7.85796	6.92851	6.66918	7.42636	7.48877	7.94592	7.94377	8.24787	8.22326
LOC387895	BC040060	16772285	1.223	0.014	0.423	0.904	0.266	0.719	0.973	0.679	0.894	chr12	-	127214333	127256957	23	4.64343	4.70321	4.72075	4.54814	4.04049	3.89385	3.9653	3.67844	4.00144	4.04767	4.35918	4.26945
SEC16B	ENST00000354921	16696779	1.223	0.015	0.429	0.769	0.002	0.189	1.178	0.034	0.341	chr1	-	177942328	177942444	16	3.55383	3.49931	3.68706	3.83882	4.30608	4.32639	3.94697	3.92774	3.08642	3.201	3.41592	3.45391
	---	16701438	1.223	0.023	0.464	0.94	0.346	0.771	1.027	0.637	0.876	chr1	-	246996750	246996831	21	2.93814	3.05068	3.01222	3.05556	3.11325	2.9667	2.96372	2.93804	2.82172	2.98553	3.23575	3.15348
ZNF430	NM_025189	16860152	1.223	0.034	0.487	1.025	0.903	0.975	0.849	0.102	0.484	chr19	+	21203426	21242852	9	5.54225	5.54009	5.13641	5.47134	5.94494	6.42511	6.64711	5.79582	5.99801	6.11196	6.24259	6.44658
INA	NM_032727	16708796	1.223	0.037	0.495	0.842	0.033	0.435	0.967	0.722	0.911	chr10	+	105036920	105050108	20	5.53893	5.23362	5.23865	5.43747	5.29539	5.14919	4.92967	5.01976	5.27781	5.32104	5.46804	5.71266
	---	16998976	1.223	0.045	0.507	0.944	0.426	0.812	0.975	0.677	0.893	chr5	-	114522574	114528483	16	4.15519	4.15838	4.18894	4.05309	4.19879	3.98757	4.02334	3.99704	4.18353	4.28951	4.65548	4.39739
	---	16980632	1.223	0.047	0.513	1.033	0.564	0.874	1.145	0.142	0.538	chr4	-	152326614	152330005	21	4.93501	4.97963	5.00165	5.3025	6.54875	6.59197	6.62261	6.61277	5.17907	5.35162	5.67101	5.44224
LOC440335	NM_001253790	16815601	1.223	0.056	0.528	1.019	0.832	0.957	0.891	0.079	0.447	chr16	+	4838398	4846492	15	4.84341	4.89791	4.75203	4.65537	4.70651	4.91257	4.96489	4.70746	4.73123	4.8553	5.22801	4.94024
	---	17096186	1.223	0.14	0.622	0.984	0.909	0.977	1.176	0.018	0.28	chr9	-	99018498	99018601	8	2.78457	2.81804	3.03109	3.04021	3.15628	3.54636	3.07014	3.58538	2.98733	3.13795	3.59344	3.11247
GAS5-AS1	NR_037605	16674005	1.223	0.191	0.665	0.934	0.439	0.818	1.145	0.074	0.439	chr1	+	173831290	173833079	17	3.94913	4.13109	4.22316	4.24696	5.02181	4.90831	5.0161	4.71898	4.65685	5.16597	5.36117	5.04246
ANKRD20A12P	AK090412	16691766	1.223	0.265	0.72	1.721	0.014	0.353	1.099	0.437	0.777	chr1	-	142620645	142714605	9	4.48904	4.84386	4.62877	4.97694	4.20949	4.65161	4.89539	5.53255	5.70491	4.96489	5.63771	5.61248
LOC100653515	NM_001243541	16849567	1.222	0.013	0.413	0.834	0.067	0.514	0.934	0.464	0.793	chr17	-	76886662	76899299	27	5.41913	5.69363	5.34515	5.56934	5.81572	5.50227	5.4307	5.36268	5.17907	5.14399	5.48627	5.41474
TTLL10	NM_001130045	16657656	1.222	0.017	0.44	1.004	0.945	0.988	0.926	0.346	0.719	chr1	+	1109264	1133315	32	6.35835	6.13758	6.22147	6.05156	6.53788	6.54747	6.49526	6.60186	6.1019	6.12535	6.4662	6.33893
	---	16882730	1.222	0.022	0.46	1.135	0.446	0.821	0.798	0.055	0.398	chr2	+	89975669	89977515	8	4.96198	4.87197	4.78185	4.40018	4.48913	5.20211	5.14348	4.91338	4.61781	4.45502	4.8003	4.8514
GNRH2	ENST00000380347	16910948	1.222	0.039	0.498	1.253	0.008	0.304	0.985	0.79	0.936	chr20	+	3024268	3026393	17	5.89513	5.9072	5.93334	5.82555	6.07036	5.99461	6.41117	6.30302	5.81273	5.99664	6.2827	6.10478
	---	17076757	1.222	0.04	0.5	1.077	0.46	0.828	1.037	0.634	0.875	chr8	-	42091193	42128715	19	4.33835	4.32194	4.51247	4.25285	4.12708	4.45866	4.28981	4.50974	4.35871	4.41219	4.80138	4.54754
	---	17023298	1.222	0.048	0.516	0.922	0.34	0.768	1.12	0.126	0.519	chr6	-	125229389	125284185	17	3.85976	3.67436	3.8968	3.96591	3.95933	3.68886	3.76827	3.64545	3.47536	3.76197	3.90449	3.91182
	---	17072661	1.222	0.061	0.532	1.291	0.017	0.371	1.001	0.994	0.999	chr8	+	128351519	128404876	22	4.18791	4.22653	4.42806	3.98863	6.25744	6.06204	6.41401	6.64401	3.94946	4.08488	4.45383	4.15804
	---	16882939	1.222	0.068	0.539	1.255	0.012	0.341	0.975	0.696	0.901	chr2	+	96331832	96334463	19	4.39294	4.27402	4.23351	4.36138	4.21451	4.1037	4.40601	4.5691	4.35058	4.3375	4.4616	4.80535
	---	16764334	1.222	0.074	0.548	1.067	0.417	0.809	0.955	0.621	0.869	chr12	-	49686414	49718359	23	4.56344	4.42657	4.26787	4.59076	4.43667	4.23766	4.51559	4.34396	4.3592	4.7046	4.8738	4.76878
	---	16750431	1.222	0.12	0.605	0.991	0.907	0.976	0.971	0.656	0.884	chr12	+	47641907	47652378	20	3.21016	3.3971	3.24245	3.27979	3.42184	3.66019	3.57469	3.48176	2.96893	3.41643	3.53819	3.42518
POLL	NM_001174084	16717706	1.221	0.011	0.407	1.199	0.015	0.359	1.412	0.001	0.101	chr10	-	103338639	103348027	30	6.79808	6.92519	7.33678	7.38291	6.83181	6.87129	7.08867	7.13795	6.40743	6.41516	6.69216	6.70563
	---	16858967	1.221	0.012	0.411	0.958	0.532	0.862	0.788	0.008	0.221	chr19	+	14444555	14454723	18	5.63295	5.80072	5.39164	5.35535	5.03779	5.15938	4.96469	5.10903	4.87045	4.87681	5.13025	5.19231
ARID3A	NM_005224	16856315	1.221	0.029	0.476	1.449	0.001	0.098	1.078	0.187	0.586	chr19	+	926037	972816	19	7.81431	7.8446	7.96024	7.9163	7.15709	7.20512	7.76616	7.66693	8.06086	8.24599	8.48795	8.39391
	---	16992694	1.221	0.032	0.481	0.918	0.172	0.652	0.949	0.506	0.814	chr5	+	175399604	175414364	8	4.04068	4.13351	3.88928	4.13552	3.94397	3.97825	3.87696	3.79682	3.75481	3.81461	4.18063	3.9657
SERPINB8	NM_002640	16852905	1.221	0.041	0.501	0.967	0.611	0.891	1.224	0.052	0.39	chr18	+	61637159	61688260	20	6.10216	6.39424	6.4705	6.60936	7.06014	7.08037	7.10307	6.9418	6.99178	7.2524	7.41962	7.40063
PTTG1	ENST00000393964	16991741	1.221	0.045	0.506	0.887	0.085	0.544	0.857	0.038	0.351	chr5	+	159848829	159855748	20	6.8949	7.03862	6.75514	6.73238	6.71892	6.77229	6.62932	6.51647	7.24092	7.14692	7.61069	7.35328
	---	16956254	1.221	0.045	0.507	0.921	0.204	0.676	1.037	0.518	0.82	chr3	-	72712435	72713404	26	3.71763	3.74215	3.83518	3.73148	3.8649	3.76283	3.67183	3.72	3.97026	3.84809	4.07416	4.31968
	---	17008512	1.221	0.047	0.515	1.13	0.175	0.655	1.003	0.963	0.991	chr6	+	41688134	41701770	16	4.61775	4.54396	4.69686	4.47444	4.28278	4.58494	4.63078	4.58927	4.28263	4.56298	4.69347	4.72891
LOC392364	NR_040117	17095518	1.221	0.05	0.519	1.157	0.231	0.697	0.984	0.866	0.962	chr9	-	90471930	90474314	10	5.93336	5.56158	5.7264	5.72232	5.79895	5.36669	5.67241	5.91612	5.45286	5.64817	5.94551	5.7314
	---	17056635	1.221	0.052	0.521	1.145	0.055	0.49	1.168	0.057	0.401	chr7	-	35297992	35299340	22	4.82456	4.81647	4.9395	5.15031	4.59946	4.71244	4.85847	4.844	4.67969	4.9752	5.0956	5.13511
	---	16763006	1.221	0.058	0.53	0.946	0.385	0.792	1.216	0.102	0.484	chr12	-	32068570	32068641	13	4.8443	4.628	4.83423	5.20185	4.76226	4.62509	4.61168	4.61513	5.02275	4.72486	5.21393	5.11001
PDE4C	NM_001098818	16870338	1.221	0.069	0.541	1.092	0.183	0.662	1.256	0.012	0.25	chr19	-	18318771	18359010	24	5.50174	5.46554	5.90787	5.71671	5.35935	5.48315	5.56719	5.52972	5.52927	5.50718	5.97799	5.63424
MMP23B	NM_006983	16657895	1.221	0.098	0.582	0.847	0.051	0.479	0.921	0.163	0.563	chr1	+	1567474	1570639	13	6.51321	6.48359	6.41188	6.34907	6.4765	6.67419	6.28066	6.38995	5.94739	6.35861	6.46452	6.41809
	---	16774545	1.221	0.105	0.59	0.932	0.474	0.834	0.932	0.299	0.684	chr13	+	45924458	45925485	24	3.85917	3.70133	3.72129	3.63725	4.03935	3.67658	3.68908	3.82356	4.14679	3.71857	4.21531	4.2255
TRDJ3	ENST00000390476	16782001	1.221	0.135	0.617	1.191	0.137	0.615	0.953	0.562	0.843	chr14	+	22928090	22928148	18	5.90051	5.60853	5.67434	5.697	5.2509	5.49282	5.81141	5.43537	5.22433	4.94054	5.17107	5.56997
	---	16907409	1.221	0.14	0.622	1.163	0.184	0.662	1.058	0.678	0.894	chr2	-	203043383	203044114	25	5.50931	5.69477	5.40681	5.96047	5.62928	5.20865	5.70335	5.57087	5.24538	5.60731	5.54234	5.88638
BCHE	ENST00000264381	16961172	1.22	0.011	0.407	0.989	0.912	0.978	0.943	0.407	0.759	chr3	-	165490692	165555260	23	3.51127	3.69333	3.57405	3.46056	3.78001	3.46677	3.74236	3.47219	3.43692	3.42377	3.71757	3.71765
	---	16870916	1.22	0.011	0.408	0.901	0.221	0.689	0.982	0.791	0.936	chr19	-	23214621	23244067	12	3.39653	3.20009	3.25413	3.29124	3.38607	3.18704	3.03865	3.23513	3.016	3.01883	3.31717	3.29153
	---	16894690	1.22	0.011	0.408	1.034	0.586	0.882	1.016	0.802	0.941	chr2	-	16137171	16203007	15	4.98047	4.83224	4.98576	4.87393	4.64038	4.60342	4.72139	4.61744	4.79239	4.81498	5.09708	5.08415
	---	16717753	1.22	0.041	0.501	0.992	0.925	0.981	1.045	0.418	0.766	chr10	-	103464409	103468158	13	2.86657	2.92456	2.94677	2.9722	3.0435	2.8876	2.83179	3.07734	3.00233	2.89832	3.35681	3.11802
COLQ	NM_005677	16951191	1.22	0.044	0.506	0.971	0.717	0.925	0.992	0.877	0.965	chr3	-	15491640	15563258	15	6.60817	6.59582	6.55126	6.62852	6.56985	6.53925	6.65084	6.37512	6.16617	6.29252	6.63669	6.39664
	---	16971484	1.22	0.054	0.525	1.131	0.143	0.621	1.053	0.745	0.92	chr4	+	152877106	152890533	20	4.25094	4.24856	4.66819	3.97853	4.54416	4.65313	4.65795	4.89487	4.41152	4.12018	4.59397	4.51234
	---	16854372	1.22	0.066	0.539	0.932	0.238	0.702	1.058	0.329	0.707	chr18	-	23537979	23539215	22	4.23089	4.18488	4.33483	4.2448	4.32682	4.37998	4.25655	4.24628	4.09093	4.39786	4.5991	4.46466
	---	16751479	1.22	0.136	0.618	0.912	0.147	0.626	0.94	0.4	0.754	chr12	+	52478518	52486069	17	4.7754	4.88817	4.84176	4.64393	4.75109	4.75752	4.57814	4.66408	4.6146	4.78416	4.75658	5.21584
	---	16713008	1.219	0.011	0.408	0.938	0.339	0.768	0.951	0.418	0.766	chr10	-	31097184	31099571	25	5.60695	5.71435	5.64029	5.53488	5.77076	5.60791	5.57862	5.61389	5.4069	5.42079	5.71211	5.68855
	---	16767987	1.219	0.011	0.408	1.049	0.435	0.816	0.913	0.184	0.583	chr12	-	80977462	80987480	17	3.29075	3.40851	3.15663	3.27983	3.2846	3.25462	3.28658	3.39048	3.23597	3.26573	3.55104	3.52354
ZDHHC12	NM_032799	17098900	1.219	0.011	0.408	0.972	0.62	0.894	1.027	0.637	0.876	chr9	-	131483148	131486408	19	10.029	9.91077	10.0147	10.0037	10.2039	10.2718	10.207	10.1859	9.82112	9.82322	10.1072	10.1095
HSD17B3	NM_000197	17096166	1.219	0.012	0.411	1.141	0.142	0.619	1.139	0.113	0.5	chr9	-	98997588	99064434	30	4.07892	3.87774	4.10039	4.23209	4.59891	4.59092	4.63788	4.93145	4.01034	4.06278	4.31357	4.33135
DTWD1	NM_020234	16800933	1.219	0.023	0.462	1.181	0.043	0.464	1.209	0.012	0.249	chr15	+	49913177	49937333	25	7.17275	7.11075	7.38268	7.44948	6.89557	7.09495	7.23576	7.23489	7.45052	7.28064	7.63923	7.66395
LOC100271702	NR_036546	16759974	1.219	0.027	0.469	0.982	0.834	0.957	1.144	0.045	0.37	chr12	-	2038368	2045742	23	4.77851	4.83579	4.96677	5.03493	5.00114	4.90255	5.07821	4.77385	4.76347	4.8552	5.00906	5.18121
MGRN1	NM_001142290	16815557	1.219	0.029	0.477	1.211	0.014	0.351	1.17	0.023	0.3	chr16	+	4674825	4740975	23	9.89005	9.82788	10.0871	10.0827	10.0947	10.0613	10.3093	10.399	10.1681	10.0383	10.4699	10.3079
	---	16801682	1.219	0.031	0.48	1.014	0.861	0.964	1	0.997	0.999	chr15	+	61890713	61897440	14	4.96095	4.8188	5.01651	4.76422	4.90762	4.69472	4.73391	4.90838	4.691	4.87533	5.01348	5.12432
	---	16831315	1.219	0.052	0.521	0.913	0.229	0.695	0.961	0.481	0.801	chr17	+	14276848	14324343	21	3.79479	3.71137	3.6884	3.70451	3.71115	3.93038	3.68152	3.69675	3.63593	3.45483	3.94731	3.7155
ZNF28	BC070146	16875088	1.219	0.092	0.575	0.961	0.799	0.949	1.094	0.128	0.521	chr19	-	53300661	53324922	9	7.49855	7.47348	7.59332	7.63608	6.78003	6.77884	7.0822	6.36115	7.7251	8.11355	8.24551	8.16487
	---	16749379	1.219	0.098	0.582	1.254	0.053	0.483	1.108	0.227	0.624	chr12	+	27124519	27132515	22	4.29022	4.19289	4.25697	4.52301	4.24579	3.98743	4.28837	4.59943	4.03124	4.3436	4.60742	4.34029
	---	16828468	1.219	0.127	0.611	1.176	0.025	0.408	0.923	0.216	0.615	chr16	-	75499272	75499773	16	5.26419	5.41041	5.20612	5.23631	4.8684	4.94531	5.13822	5.14414	4.92475	5.17874	5.14008	5.53482
DKFZp434J0226	NR_027003	16863404	1.219	0.178	0.656	1.085	0.353	0.774	0.888	0.121	0.512	chr19	+	46704187	46718714	18	5.61101	5.52476	5.49255	5.29866	5.24339	5.5571	5.53873	5.49764	5.38841	5.05237	5.27863	5.73388
LINC00357	ENST00000420140	16777533	1.219	0.368	0.779	0.893	0.454	0.825	1.133	0.182	0.581	chr13	-	25511014	25512491	11	6.27354	6.53572	6.67686	6.49193	8.38627	8.03435	7.75983	8.33413	4.63621	5.3674	5.58807	4.98848
REEP2	ENST00000254901	16989719	1.218	0.011	0.408	1.39	0.001	0.118	1.017	0.808	0.944	chr5	+	137774706	137782658	20	6.73866	6.81461	6.90962	6.69346	8.82241	8.88232	9.3307	9.3234	8.80519	8.81168	9.08166	9.10397
EI24	NM_004879	16733045	1.218	0.012	0.411	1.18	0.023	0.399	1.192	0.014	0.261	chr11	+	125439112	125454575	32	11.0646	11.0138	11.2777	11.3071	11.0545	11.0722	11.3382	11.2665	10.9191	10.9378	11.1857	11.2422
	---	16754836	1.218	0.012	0.412	1.109	0.171	0.651	1.003	0.951	0.987	chr12	+	84665119	84688341	23	3.28403	3.29449	3.3185	3.26923	3.36418	3.26892	3.3738	3.55716	3.23842	3.24185	3.5544	3.49489
CCDC159	NM_001080503	16858435	1.218	0.013	0.415	0.98	0.728	0.929	1.006	0.961	0.99	chr19	+	11457181	11465620	21	5.39333	5.30287	5.59329	5.11909	5.60531	5.66984	5.59114	5.62617	5.28897	5.23091	5.56774	5.52173
CEACAM20	NM_001102597	16873190	1.218	0.014	0.423	1.077	0.217	0.687	0.998	0.968	0.992	chr19	-	45005729	45033811	20	5.17507	5.31913	5.24104	5.24617	5.37957	5.36386	5.50509	5.45309	5.33403	5.36476	5.6746	5.59361
PTPRU	NM_133178	16661730	1.218	0.014	0.426	1.142	0.05	0.478	1.166	0.04	0.357	chr1	+	29563028	29653325	28	8.51603	8.57111	8.6946	8.837	9.3679	9.30512	9.51421	9.5429	8.69173	8.6745	8.92218	9.01332
	---	17108883	1.218	0.015	0.429	0.966	0.709	0.923	1.128	0.096	0.478	chrX	-	4689124	4692236	18	4.16401	3.99646	4.23169	4.27764	4.2162	4.03746	4.23304	3.9211	4.17945	4.26992	4.48581	4.53334
	---	16920237	1.218	0.017	0.441	1.123	0.106	0.576	1.073	0.214	0.613	chr20	-	48927248	48937879	20	5.57852	5.61756	5.69205	5.70511	5.46782	5.55933	5.61678	5.74596	5.2844	5.39599	5.65306	5.59806
SPSB4	ENST00000310546	16946331	1.218	0.018	0.449	1.115	0.107	0.578	0.699	0.012	0.249	chr3	+	140770244	140867453	20	5.46145	5.22141	4.9968	4.65437	4.72007	4.82495	4.9567	4.90326	4.77449	4.86801	5.05794	5.15312
	---	16836330	1.218	0.019	0.453	1.084	0.426	0.813	1.078	0.21	0.61	chr17	+	55043460	55048783	17	3.80933	3.73537	3.84531	3.91726	3.84542	3.95538	4.2135	3.82209	3.51782	3.66138	3.87017	3.87962
CHST10	NM_004854	16901125	1.218	0.019	0.453	1.069	0.282	0.73	0.947	0.506	0.814	chr2	-	101008322	101034130	32	5.17494	5.01977	4.89831	5.13975	5.15503	5.09069	5.25345	5.1838	5.04214	4.90266	5.2734	5.24061
CALCOCO1	NM_020898	16765404	1.218	0.019	0.453	1.185	0.029	0.42	1.317	0.002	0.127	chr12	-	54104902	54121529	26	6.32856	6.33806	6.75261	6.70886	7.64377	7.78174	7.97841	7.938	6.78171	6.79116	7.00134	7.13915
LOC100507291	ENST00000510068	16946260	1.218	0.024	0.464	1.078	0.543	0.865	1.386	0.001	0.088	chr3	+	139108657	139302161	26	5.71844	5.70273	6.20553	6.15683	6.38123	6.07689	6.55138	6.12185	5.30818	5.48181	5.66661	5.69319
SIM1	ENST00000369208	17022018	1.218	0.023	0.464	0.973	0.66	0.906	0.849	0.027	0.32	chr6	-	100832891	100912805	24	4.17763	4.09972	3.95349	3.84943	4.042	3.91355	3.92486	3.952	3.95556	3.9081	4.13356	4.29875
RSAD2	NM_080657	16876764	1.218	0.03	0.479	0.89	0.091	0.553	0.859	0.059	0.404	chr2	+	7005937	7038370	28	4.60864	4.49552	4.24652	4.41774	4.82872	4.70782	4.61209	4.58888	4.39533	4.25689	4.68963	4.53176
	---	16763011	1.218	0.031	0.48	0.999	0.981	0.997	1.033	0.647	0.881	chr12	-	32257051	32260462	20	5.14201	5.24445	5.34338	5.13788	5.35866	5.23132	5.34502	5.24053	5.04586	5.22181	5.47546	5.35962
TCP11L2	NM_152772	16756310	1.218	0.04	0.498	1.01	0.885	0.97	1.232	0.009	0.229	chr12	+	106695707	106740793	42	5.93865	5.83415	6.16789	6.20788	6.92341	7.10943	7.10057	6.96268	6.73977	6.67235	6.87029	7.11123
	---	16754410	1.218	0.042	0.502	1.129	0.127	0.602	0.815	0.027	0.318	chr12	+	76709531	76709828	22	4.04012	3.85632	3.57736	3.72881	3.86126	3.74184	3.88169	4.07062	3.68337	3.60928	4.05445	3.80674
ACER1	NM_133492	16867648	1.218	0.044	0.506	0.963	0.53	0.861	0.991	0.914	0.976	chr19	-	6306510	6333640	19	4.52048	4.80267	4.61932	4.67869	4.49119	4.56602	4.44294	4.5059	4.61932	4.76533	4.86569	5.08644
	---	16733550	1.218	0.061	0.531	0.907	0.145	0.624	1.117	0.082	0.454	chr11	+	131123317	131170666	22	3.98252	3.91518	4.13627	4.07985	4.09033	3.97366	3.86516	3.91648	3.89059	3.90507	4.02445	4.34026
	---	17074102	1.218	0.068	0.539	1.09	0.365	0.781	0.986	0.925	0.979	chr8	-	1741068	1744122	19	4.45711	4.0799	3.98512	4.51177	3.91645	4.15572	4.02612	4.29428	4.00625	4.32528	4.39595	4.50451
STX1B	NM_052874	16825911	1.218	0.098	0.582	1.097	0.34	0.768	0.92	0.316	0.699	chr16	-	31000577	31021829	20	5.27681	5.55046	5.32663	5.26038	5.24728	5.53807	5.64242	5.4111	5.20374	5.60841	5.70572	5.67406
	---	16847207	1.218	0.112	0.597	1.595	0.036	0.442	1.011	0.894	0.97	chr17	-	56756888	56757051	9	7.21695	7.43772	7.45726	7.23021	4.86593	4.99096	6.02494	5.17943	6.41259	6.06798	6.39002	6.66145
IGLL1	NM_020070	16933009	1.218	0.129	0.612	1.065	0.397	0.799	1.02	0.728	0.913	chr22	-	23915312	23922495	10	5.89534	5.98044	5.94019	5.99151	6.04201	6.06245	6.25471	6.03091	5.35721	5.82638	5.89755	5.85585
LOC100128531	NR_038941	16933252	1.218	0.174	0.653	1.027	0.711	0.923	1.098	0.154	0.552	chr22	-	25498384	25508659	14	5.3905	5.25027	5.448	5.46311	5.40248	5.29203	5.28871	5.4828	5.46108	5.30639	5.40114	5.93549
	---	16690288	1.218	0.204	0.676	1.12	0.255	0.712	0.648	0.002	0.121	chr1	-	103960701	104068139	9	6.42762	6.37467	5.91828	5.63425	6.01974	6.33949	6.24682	6.43878	5.93724	5.50402	6.2181	5.79039
CD300LF	NM_139018	16848619	1.217	0.012	0.412	1.069	0.362	0.78	0.82	0.135	0.53	chr17	-	72690452	72709117	21	5.27853	5.09574	4.6673	5.13435	5.26467	5.13222	5.37691	5.21146	4.98624	4.93319	5.23585	5.25048
CXorf23	ENST00000379687	17109644	1.217	0.013	0.414	0.908	0.158	0.637	1.342	0.003	0.156	chrX	-	19930978	19988416	27	6.43342	6.60457	6.94818	6.93852	7.81339	7.67018	7.60057	7.60486	6.25013	6.20358	6.53321	6.48633
	---	16697387	1.217	0.015	0.429	1.134	0.119	0.592	1	0.998	0.999	chr1	-	188124970	188125311	14	3.77092	3.45368	3.74467	3.48082	3.5991	3.79479	3.81792	3.93868	3.41261	3.39252	3.73572	3.63616
	---	16811159	1.217	0.015	0.429	1.09	0.367	0.783	0.959	0.567	0.844	chr15	-	69617632	69617759	17	5.23334	5.00153	5.01793	5.09402	5.34854	5.10216	5.48004	5.21784	5.07635	5.15795	5.42545	5.37488
	---	17051067	1.217	0.016	0.438	1.07	0.592	0.883	0.945	0.559	0.842	chr7	+	126855181	126869975	18	4.39364	4.03559	4.18248	4.08479	4.14432	4.16186	3.97687	4.52422	4.12057	4.23226	4.44794	4.47181
	---	16930132	1.217	0.018	0.452	1.084	0.236	0.7	1.239	0.184	0.583	chr22	+	39130730	39134995	20	5.54694	5.94327	5.79729	6.31061	6.45506	6.30131	6.49079	6.4969	6.00215	5.86848	6.22264	6.21478
HMGA1P7	NR_037938	17023807	1.217	0.027	0.47	1.008	0.914	0.978	0.802	0.02	0.288	chr6	-	134435100	134438818	16	6.18274	5.96979	5.70376	5.81011	5.88854	5.76622	5.74976	5.92692	5.93829	5.94171	6.12702	6.31801
	---	16927958	1.217	0.044	0.504	1.068	0.358	0.777	1.015	0.778	0.933	chr22	+	23775751	23777258	17	6.911	6.86727	6.94781	6.87478	6.85139	6.89352	6.86837	7.06649	6.82037	6.94325	7.28054	7.04997
GDPD3	ENST00000406256	16825647	1.217	0.046	0.508	0.913	0.189	0.665	0.977	0.771	0.93	chr16	-	30116131	30125177	18	6.42292	6.60893	6.36711	6.59621	6.26921	6.22517	6.03584	6.19409	6.32219	6.57672	6.69202	6.77255
	---	17010604	1.217	0.062	0.533	1.016	0.817	0.953	1.187	0.016	0.27	chr6	+	81128031	81175644	21	5.29838	5.27955	5.50745	5.56448	5.30815	5.10382	5.24617	5.21248	4.81076	4.93704	5.30148	5.01197
ZBED2	ENST00000317012	16957304	1.217	0.101	0.586	1.018	0.757	0.936	1.041	0.494	0.809	chr3	-	111311747	111314290	23	7.59064	7.60466	7.59448	7.7173	7.13094	7.11826	7.18136	7.11893	5.24758	4.85786	5.39848	5.27302
TGS1	NM_024831	17069045	1.216	0.012	0.41	1.175	0.022	0.397	1.147	0.044	0.369	chr8	+	56685701	56738007	25	9.36259	9.36523	9.51061	9.61413	8.88206	8.91646	9.13312	9.13221	9.71416	9.69768	9.99355	9.98141
LOC100653319	ENST00000380259	16734922	1.216	0.012	0.411	0.981	0.727	0.928	0.989	0.838	0.953	chr11	-	5593552	5646126	15	3.35914	3.2747	3.28265	3.31883	3.31883	3.28757	3.26641	3.28349	3.10951	3.15031	3.40972	3.41464
PDE11A	NM_016953	16905528	1.216	0.012	0.411	0.943	0.363	0.78	1.058	0.447	0.783	chr2	-	178487977	178973081	29	4.46757	4.6462	4.7197	4.5581	4.49234	4.6294	4.4972	4.45441	4.77011	4.73276	5.03991	5.02637
MVP	NM_017458	16817692	1.216	0.013	0.414	1.025	0.697	0.919	1.223	0.039	0.355	chr16	+	29831715	29859360	27	8.07984	8.11213	8.24737	8.52738	7.65773	7.55285	7.67675	7.60313	6.69943	6.66008	6.93944	6.98425
ZNF195	NR_040083	16734621	1.216	0.021	0.46	1.343	0.006	0.279	1.338	0.002	0.127	chr11	-	3360491	3400452	26	6.74767	6.79789	7.15134	7.23437	6.69783	6.61104	6.95816	7.20025	7.11189	7.0889	7.45871	7.3066
TGM3	NM_003245	16910766	1.216	0.022	0.46	1.079	0.214	0.684	0.995	0.944	0.985	chr20	+	2276613	2321725	24	5.02317	4.93483	5.05339	4.89143	5.25291	5.18088	5.33622	5.31774	4.94733	4.9208	5.29275	5.1393
CEP76	NM_024899	16854046	1.216	0.022	0.462	1.176	0.022	0.398	1.381	0.001	0.111	chr18	-	12672631	12702773	23	8.33682	8.44415	8.83119	8.88251	8.59721	8.56013	8.80747	8.8169	8.3463	8.19632	8.58369	8.52294
WDFY2-AS1	ENST00000413571	16779280	1.216	0.026	0.468	0.934	0.249	0.709	1.02	0.771	0.93	chr13	-	52195049	52197358	18	3.02991	2.92	2.92543	3.07971	2.99426	2.97628	2.88244	2.89258	3.14611	2.96632	3.3554	3.3219
LOC100129620	NR_033940	16667512	1.216	0.026	0.469	1.017	0.777	0.942	0.821	0.008	0.215	chr1	+	99469832	99614408	17	3.96703	3.97393	3.6758	3.69625	3.55623	3.5601	3.63731	3.52801	3.40707	3.58968	3.79649	3.76395
	---	17015884	1.216	0.026	0.469	0.978	0.764	0.938	1.061	0.473	0.798	chr6	-	17501598	17511496	18	3.23508	3.12451	3.39723	3.13219	3.36065	3.17034	3.30353	3.16384	2.98983	3.06834	3.39543	3.22766
TSIX	NR_003255	17104920	1.216	0.03	0.477	1.048	0.581	0.88	1.044	0.655	0.884	chrX	+	73012040	73049066	21	4.464	4.10137	4.30436	4.38419	4.2492	4.44746	4.53717	4.29543	4.12525	4.3126	4.46097	4.54075
PYCARD	ENST00000247470	16825997	1.216	0.032	0.483	0.922	0.27	0.722	0.934	0.339	0.714	chr16	-	31212807	31214313	15	5.04212	4.84854	4.88989	4.80329	5.31645	5.12582	5.14602	5.0622	4.78928	4.78149	5.17469	4.96012
	---	16979900	1.216	0.048	0.516	1.203	0.085	0.545	0.716	0.063	0.416	chr4	-	138621974	138622024	12	5.52554	5.64572	5.43203	4.77813	5.60663	5.98059	6.08075	6.0408	5.96296	6.23029	6.40803	6.34917
	---	17073368	1.216	0.075	0.548	0.868	0.046	0.471	1.361	0.021	0.293	chr8	+	144624280	144624570	8	5.52992	5.42064	5.72089	6.1188	5.65837	5.59278	5.37694	5.46409	5.57672	5.50852	5.65299	5.99563
C6orf223	NM_153246	17009117	1.216	0.098	0.582	1.037	0.726	0.928	1	0.997	0.999	chr6	+	43968317	43973695	20	6.7517	6.90909	6.83455	6.82684	6.22864	5.9872	6.34277	5.97942	5.89911	6.19467	6.46367	6.19321
	---	17107485	1.216	0.115	0.601	1.014	0.839	0.958	1.013	0.849	0.956	chrX	+	144138628	144138957	12	3.31232	3.48823	3.42147	3.4142	3.54434	3.3515	3.50213	3.43441	3.50551	3.5895	4.04321	3.61484
GPR173	ENST00000332582	17103946	1.216	0.119	0.604	0.92	0.201	0.674	1.044	0.558	0.841	chrX	+	53078273	53109797	24	6.43173	6.49134	6.40789	6.63969	6.74543	6.86094	6.66101	6.70447	5.23727	5.53479	5.83284	5.5028
LOC100506105	ENST00000500612	16820863	1.216	0.162	0.644	1.187	0.04	0.456	0.899	0.143	0.539	chr16	+	71496181	71499844	21	6.58425	6.45508	6.29957	6.4347	6.43531	6.27479	6.53951	6.66408	6.4513	6.35241	6.94232	6.42489
LCE2C	NM_178429	16671041	1.215	0.016	0.433	0.99	0.919	0.979	0.938	0.451	0.785	chr1	+	152647771	152649050	11	4.19805	4.17267	4.2454	3.93901	4.12997	4.35528	4.3709	4.08733	4.10404	4.00439	4.34861	4.32194
FAM46A	ENST00000369754	17021092	1.215	0.025	0.464	1.145	0.052	0.479	0.893	0.069	0.427	chr6	-	82201156	82462491	23	8.43621	8.47119	8.3183	8.2602	7.99824	7.97824	8.13675	8.23021	7.01547	7.11978	7.41956	7.27864
OR2L1P	NR_002145	16679769	1.215	0.027	0.471	1.02	0.722	0.927	1.028	0.704	0.904	chr1	+	248153569	248154493	12	7.72291	7.68425	7.62589	7.86109	7.96684	7.98894	8.0066	8.00644	7.86502	7.68975	8.02359	8.09236
MTRNR2L10	NM_001190708	17111545	1.215	0.029	0.476	1.17	0.253	0.71	0.959	0.619	0.869	chrX	-	55207824	55208944	8	4.08606	4.20625	3.9497	4.22354	4.21216	3.86962	4.50185	4.03467	4.05624	4.10079	4.4552	4.264
HS3ST2	ENST00000261374	16816948	1.215	0.029	0.477	1.07	0.414	0.807	0.843	0.149	0.546	chr16	+	22825498	22928087	20	4.318	4.59562	4.38028	4.04059	4.35304	4.16105	4.45885	4.24936	4.13019	4.23642	4.5476	4.38076
	---	16703237	1.215	0.044	0.505	1.013	0.896	0.973	0.983	0.756	0.923	chr10	+	23632886	23634110	20	5.84151	5.78189	5.82816	5.74506	5.57267	5.74732	5.49743	5.85975	5.63195	5.54646	5.99237	5.7481
LOC401320	BX648714	17056372	1.215	0.044	0.506	1.067	0.293	0.737	1.096	0.154	0.552	chr7	-	30555925	30617395	15	5.51464	5.47931	5.56646	5.69228	6.07573	6.09196	6.12888	6.22612	5.59648	5.48095	5.70359	5.93495
	---	16702422	1.215	0.056	0.528	1.013	0.831	0.957	0.945	0.302	0.687	chr10	+	11072297	11072831	23	3.17153	3.19786	3.09941	3.10825	3.3002	3.38023	3.31472	3.40305	3.02554	3.16299	3.5062	3.24412
	---	16889048	1.215	0.058	0.53	1.008	0.934	0.984	1.024	0.835	0.952	chr2	+	197124748	197128928	20	3.37733	3.52233	3.70979	3.25843	3.34558	3.38218	3.54065	3.20816	3.53761	3.42252	3.9002	3.6219
	---	16661723	1.215	0.068	0.539	0.997	0.958	0.991	0.959	0.431	0.774	chr1	+	29479001	29479503	18	5.26745	5.2619	5.21168	5.19734	5.16676	5.22404	5.09443	5.28583	5.14292	5.1747	5.2759	5.604
	---	16739229	1.215	0.08	0.554	1.189	0.055	0.489	1.12	0.265	0.658	chr11	-	61883944	61891289	10	5.93763	6.06729	5.98876	6.34225	6.11712	5.92529	6.18352	6.35975	6.25939	6.55768	6.78956	6.58997
	---	17025320	1.215	0.11	0.595	0.934	0.292	0.736	0.864	0.042	0.364	chr6	-	160536101	160539659	18	4.32728	4.19806	4.03642	4.06648	4.38238	4.2461	4.2073	4.22339	3.99633	4.41124	4.43875	4.53081
LUST	NR_045388	16954343	1.215	0.115	0.601	0.903	0.116	0.59	1.11	0.146	0.542	chr3	-	50137036	50138421	18	4.76906	4.68449	4.95896	4.79521	4.91035	4.84218	4.75539	4.70408	4.74446	5.00322	4.98057	5.32965
LXN	NM_020169	16960911	1.215	0.153	0.636	0.999	0.986	0.998	0.951	0.35	0.721	chr3	-	158363611	158390482	26	3.5977	3.60256	3.54833	3.5055	3.40376	3.51354	3.42524	3.4889	6.41921	6.03131	6.34115	6.67206
	---	16956356	1.215	0.16	0.642	0.906	0.353	0.773	1.218	0.156	0.554	chr3	-	75758794	75834734	11	3.34073	2.99423	3.65661	3.2464	4.73925	4.66174	4.76682	4.34873	4.24949	4.40109	4.35739	4.85459
	---	16840442	1.215	0.167	0.649	1.099	0.131	0.607	0.927	0.595	0.858	chr17	-	6778553	6784435	14	5.3796	5.16867	4.87864	5.45123	5.68423	5.73794	5.8361	5.85865	4.99764	4.71038	5.36121	4.90946
OTOP3	NM_178233	16837670	1.214	0.012	0.412	1.228	0.01	0.324	0.959	0.601	0.861	chr17	+	72931897	72945541	23	5.68946	5.48188	5.43281	5.61841	5.56961	5.61426	5.8411	5.93446	5.47105	5.50974	5.77252	5.76877
SEC22A	NM_012430	16944763	1.214	0.012	0.413	1.111	0.093	0.556	1.265	0.007	0.211	chr3	+	122920774	122993395	26	7.69903	7.84515	8.10045	8.12257	8.32074	8.32608	8.4776	8.47269	8.28116	8.2592	8.56677	8.53325
CPT2	NM_000098	16664852	1.214	0.013	0.414	1.017	0.775	0.941	1.287	0.003	0.154	chr1	+	53662101	53679869	22	7.93194	8.00066	8.34528	8.3146	8.53174	8.59086	8.5473	8.62401	8.80355	8.75821	9.05764	9.06356
DQX1	NM_133637	16899316	1.214	0.014	0.427	2.63	0	0.011	1.555	0.002	0.127	chr2	-	74745258	74753463	28	5.33877	5.0791	5.92709	5.76398	7.04049	6.83436	8.2651	8.39966	5.27593	5.3318	5.61286	5.55495
CUL7	NM_014780	17019287	1.214	0.02	0.457	1.009	0.905	0.975	1.237	0.028	0.323	chr6	-	43005355	43021683	21	7.56382	7.82458	7.98556	8.01674	8.45428	8.2186	8.34466	8.35359	7.77081	7.66457	8.04389	7.9507
	---	16706382	1.214	0.022	0.462	0.986	0.799	0.949	0.893	0.086	0.461	chr10	+	78737456	78738351	18	4.60221	4.48954	4.36958	4.39573	4.58553	4.58633	4.55139	4.57945	4.58298	4.51665	4.7582	4.9017
	---	16805891	1.214	0.024	0.464	1.117	0.116	0.59	0.872	0.053	0.391	chr15	-	21912351	21913857	21	5.07974	4.94799	4.81893	4.81445	4.87611	4.95081	5.13925	5.00758	4.82447	4.75563	5.14416	4.99528
C9orf139	ENST00000314330	17091539	1.214	0.028	0.475	1.194	0.036	0.442	0.861	0.062	0.413	chr9	+	139921916	139931234	19	6.39239	6.22701	6.15392	6.0342	6.07905	6.13817	6.26611	6.46398	6.04693	6.02736	6.22159	6.41279
	---	17101551	1.214	0.031	0.481	1.066	0.365	0.782	0.968	0.707	0.905	chrX	+	13066231	13104187	24	3.74895	3.58066	3.75583	3.47979	3.74319	3.68726	3.89972	3.71452	3.74459	3.54325	3.94422	3.90293
	---	16983738	1.214	0.035	0.491	1.013	0.838	0.958	0.969	0.622	0.87	chr5	+	31754326	31754763	19	3.63893	3.54964	3.62457	3.47232	3.69819	3.63737	3.63737	3.73366	3.55413	3.51889	3.70652	3.92669
	---	17055244	1.214	0.046	0.512	1.027	0.693	0.917	0.931	0.485	0.803	chr7	-	10676620	10677930	22	4.21299	3.86013	4.02865	3.8381	4.00676	4.18963	4.15688	4.11669	3.89086	4.08907	4.35792	4.18206
	---	16983016	1.214	0.061	0.533	0.981	0.792	0.946	1.01	0.9	0.972	chr5	+	7344692	7346034	18	3.34965	3.52991	3.34456	3.56399	3.45068	3.68741	3.52656	3.55544	3.22954	3.53201	3.69609	3.62619
	---	17067357	1.214	0.07	0.543	1.121	0.088	0.549	0.923	0.218	0.616	chr8	+	27761998	27767827	12	6.99041	6.8445	6.78512	6.81857	6.61321	6.71249	6.83606	6.81959	6.37734	6.70973	6.82293	6.82451
	---	16911145	1.214	0.097	0.581	0.952	0.565	0.874	0.998	0.983	0.995	chr20	+	4849630	4849764	16	5.1051	4.77976	4.87594	5.0034	4.88115	5.00491	4.72648	5.01691	4.79628	5.0471	5.04876	5.3539
	---	16764325	1.214	0.196	0.668	1.186	0.356	0.776	1.025	0.869	0.963	chr12	-	49658939	49667089	17	5.93483	5.59238	5.52323	6.07483	5.31415	5.07564	5.83938	5.04202	6.01506	6.08366	6.039	6.61918
	---	17085602	1.214	0.276	0.728	0.998	0.973	0.995	1.053	0.498	0.81	chr9	+	70941645	70945547	9	5.46395	5.43838	5.39895	5.65328	5.55863	5.44312	5.54115	5.4545	4.84325	5.53977	5.35657	5.58697
POU5F2	NM_153216	16998130	1.213	0.014	0.429	1.058	0.353	0.773	0.907	0.248	0.643	chr5	-	93076015	93077309	19	5.4126	5.13098	5.12748	5.13472	5.29759	5.20313	5.34186	5.32238	5.12485	5.05961	5.34966	5.39186
LOC100507501	NR_039999	16823504	1.213	0.015	0.43	1.183	0.023	0.4	1.186	0.032	0.334	chr16	-	4295340	4303792	21	5.21469	5.38638	5.55014	5.5432	5.44694	5.45201	5.6482	5.73401	5.58319	5.66188	5.92341	5.87928
	---	16850505	1.213	0.019	0.456	0.897	0.094	0.557	1.032	0.547	0.836	chr18	+	2167794	2170196	15	4.18198	4.15073	4.19146	4.23404	4.23485	4.29698	4.12885	4.08898	3.97029	4.02131	4.33499	4.21369
	---	16743806	1.213	0.02	0.457	1.027	0.74	0.932	1.109	0.177	0.576	chr11	-	103655495	103720223	24	3.534	3.5986	3.60869	3.82116	3.5675	3.54398	3.73246	3.45531	3.59695	3.46196	3.82702	3.78993
	---	16915691	1.213	0.024	0.464	0.954	0.419	0.809	0.994	0.936	0.982	chr20	+	61055655	61066245	18	5.82271	5.61054	5.77362	5.64246	5.55268	5.49298	5.46756	5.44169	5.48589	5.34305	5.6533	5.73335
	---	17098460	1.213	0.024	0.464	1.027	0.646	0.902	0.943	0.302	0.687	chr9	-	129032400	129038197	21	4.43042	4.3606	4.29356	4.32863	4.4102	4.3745	4.45003	4.41014	4.20545	4.34758	4.5134	4.59564
CHRDL2	ENST00000263671	16742124	1.213	0.029	0.476	0.99	0.864	0.965	0.907	0.111	0.497	chr11	-	74407474	74442430	31	5.80188	5.72585	5.60801	5.6378	5.78006	5.78347	5.79111	5.74457	5.73391	5.69296	6.08655	5.89864
CTSK	NM_000396	16692846	1.213	0.03	0.479	0.988	0.883	0.97	1.245	0.035	0.342	chr1	-	150768684	150780917	22	5.33085	5.63293	5.77983	5.81543	5.63552	5.71551	5.52191	5.79518	5.21186	5.40029	5.61328	5.55458
C3orf79	AF086445	16947131	1.213	0.032	0.481	0.99	0.885	0.971	0.872	0.045	0.372	chr3	+	153202284	153220486	17	3.21191	3.11289	2.95354	2.97803	3.1775	2.95357	3.08258	3.01817	3.16929	3.00716	3.30307	3.4323
SOWAHA	NM_175873	16989124	1.213	0.032	0.481	0.854	0.068	0.515	0.908	0.353	0.724	chr5	+	132149033	132152489	21	5.88976	5.50227	5.5138	5.60122	5.85003	6.07944	5.78159	5.69296	5.31237	5.5075	5.65578	5.72263
CELA1	NM_001971	16764749	1.213	0.031	0.481	1.018	0.754	0.936	0.873	0.036	0.345	chr12	-	51722227	51740463	22	4.55631	4.55323	4.3408	4.3771	4.76666	4.69167	4.78088	4.73038	4.5006	4.37976	4.79857	4.63681
FAM129A	NM_052966	16697196	1.213	0.034	0.489	1.049	0.402	0.801	1.529	0	0.065	chr1	-	184759858	184943682	31	6.21434	6.37359	6.8875	6.92738	5.20718	5.2155	5.28937	5.27182	4.81378	5.0097	5.14385	5.2364
KRT12	ENST00000251643	16844487	1.213	0.037	0.496	1.053	0.416	0.808	1.057	0.434	0.775	chr17	-	39017195	39023462	14	2.88393	2.99373	2.92557	3.113	3.14028	3.01578	3.12385	3.18187	3.073	2.89552	3.19032	3.3359
	---	16729784	1.213	0.049	0.518	1.12	0.127	0.602	0.943	0.637	0.876	chr11	+	86438397	86476307	20	3.57175	3.82492	3.84439	3.38134	3.92855	3.91836	3.99357	4.18081	3.70336	3.76641	3.88234	4.14486
	---	17112337	1.213	0.049	0.518	1.086	0.552	0.868	1.156	0.181	0.58	chrX	-	77380890	77381770	20	8.85335	8.72014	8.80823	9.18333	8.36242	7.97393	8.52525	8.04917	8.67504	8.61328	8.79055	9.05494
	---	16995996	1.213	0.087	0.567	1.022	0.749	0.935	1.008	0.868	0.962	chr5	-	44495720	44510384	25	3.32868	3.32242	3.34247	3.33322	3.18331	3.37185	3.26384	3.35621	3.40924	3.46229	3.53103	3.89792
PTX4	NM_001013658	16822757	1.213	0.099	0.583	0.928	0.458	0.828	0.896	0.252	0.647	chr16	-	1535940	1538910	23	5.77873	5.82427	5.8146	5.47015	5.75767	6.04614	5.9343	5.65252	5.57316	5.94978	6.10109	5.97834
SP7	ENST00000536324	16765315	1.213	0.104	0.589	1.161	0.072	0.522	0.88	0.077	0.445	chr12	-	53720359	53739099	23	5.3945	5.234	5.11165	5.14761	5.05247	5.21436	5.42508	5.27084	5.20476	4.80328	5.24705	5.3185
OR8B8	NM_012378	16745651	1.213	0.106	0.591	1.03	0.753	0.936	0.968	0.628	0.873	chr11	-	124310022	124311054	9	4.39326	4.37127	4.23421	4.43548	4.27314	4.47566	4.25622	4.57946	4.60866	4.22719	4.77767	4.61692
	---	16704006	1.213	0.115	0.601	0.973	0.711	0.923	0.982	0.783	0.934	chr10	+	38265753	38281395	23	3.68134	3.51118	3.61138	3.52916	3.72283	3.48985	3.57096	3.56332	3.53213	3.46007	3.98484	3.56332
SEMA3B	NM_004636	16941024	1.213	0.125	0.609	1.309	0.002	0.179	1.247	0.009	0.222	chr3	+	50305040	50314573	28	6.78571	6.71339	7.01113	7.12307	9.01208	8.9891	9.38842	9.39121	6.01091	6.06016	6.53766	6.09097
	---	17001501	1.213	0.127	0.611	1.022	0.734	0.93	1.103	0.193	0.593	chr5	-	149016983	149020628	19	5.65176	5.44128	5.72169	5.65564	5.63049	5.50516	5.62845	5.56841	5.47516	5.06286	5.64431	5.45237
UNC5D	NM_080872	17067801	1.213	0.13	0.612	0.981	0.788	0.945	0.857	0.022	0.297	chr8	+	35092975	35654068	19	4.48597	4.51915	4.28409	4.27487	4.49382	4.48972	4.57504	4.35282	4.37596	4.52805	4.94754	4.51418
	---	16821411	1.213	0.13	0.613	1.295	0.003	0.216	1.067	0.453	0.786	chr16	+	83964877	83967981	14	5.42028	5.22768	5.54377	5.29303	4.96547	5.05242	5.37888	5.38558	5.14986	4.79989	5.40249	5.10451
OR1D5	NM_014566	16839671	1.213	0.148	0.63	1.045	0.774	0.941	1.14	0.058	0.403	chr17	-	2965963	2966901	11	3.24125	3.20098	3.46979	3.35125	3.08491	3.51393	3.63893	3.08666	3.197	3.40993	3.80401	3.35976
	---	17104573	1.213	0.187	0.662	1.112	0.221	0.69	0.967	0.539	0.831	chrX	+	69670729	69670872	13	3.16996	3.25184	3.14808	3.17543	3.01783	3.26611	3.2169	3.37365	3.19607	3.07637	3.13906	3.68918
GUSBP3	NR_027386	16996946	1.213	0.299	0.742	0.696	0.036	0.441	1.435	0.112	0.5	chr5	-	68935290	69006272	26	4.56316	4.32907	4.52815	5.40544	5.59703	4.96246	4.79327	4.72313	4.01724	4.75792	4.78378	4.55038
TTTY18	NR_001550	17116832	1.213	0.3	0.742	1.135	0.081	0.537	0.758	0.005	0.193	chrY	-	8551411	8551919	21	4.75724	4.7845	4.46979	4.2738	4.76414	4.9064	4.99087	5.04536	4.32318	4.51484	5.07307	4.32237
ZSWIM4	NM_023072	16858865	1.212	0.013	0.415	0.953	0.455	0.826	1.14	0.12	0.511	chr19	+	13906274	13943044	25	6.40373	6.30154	6.65845	6.42444	6.40372	6.3066	6.23436	6.33797	6.52913	6.50699	6.7785	6.81132
	---	16711790	1.212	0.014	0.423	1.013	0.9	0.974	1.019	0.764	0.926	chr10	-	12124194	12125895	18	4.03958	4.01188	4.13425	3.97145	4.18579	4.54204	4.50467	4.26088	4.0896	4.15416	4.3963	4.40154
	---	16734752	1.212	0.015	0.429	1.119	0.087	0.546	0.945	0.548	0.836	chr11	-	3875548	3876739	20	5.24812	5.60347	5.36481	5.32449	5.45295	5.37934	5.58687	5.56884	5.17635	5.25483	5.48455	5.50147
NUPR1	NM_001042483	16825371	1.212	0.016	0.436	1.035	0.761	0.937	1.739	0	0.041	chr16	-	28548606	28550495	22	5.75112	5.54391	6.44713	6.44384	5.5578	5.91155	5.61989	5.94885	5.51156	5.55323	5.76597	5.8523
	---	16851078	1.212	0.018	0.444	1.214	0.03	0.426	1.006	0.941	0.984	chr18	+	12288322	12291290	21	4.82653	4.55895	4.74849	4.65387	4.73912	4.82709	5.1695	4.95655	4.66141	4.74809	4.94701	5.01584
	---	16976886	1.212	0.022	0.46	0.932	0.595	0.884	1.467	0.008	0.215	chr4	-	75919087	75960034	17	5.18646	4.95316	5.78509	5.46006	5.69502	5.14177	5.40512	5.22893	4.40562	4.5471	4.7723	4.73515
ECT2L	NM_001077706	17013033	1.212	0.026	0.468	0.991	0.879	0.969	1.02	0.743	0.918	chr6	+	139117063	139225207	26	3.79205	3.79325	3.9015	3.74243	3.92497	4.02051	3.9267	3.99224	3.79675	3.64231	3.95777	4.03549
SCNN1D	NM_001130413	16657683	1.212	0.026	0.469	1.146	0.057	0.492	1.015	0.804	0.942	chr1	+	1210339	1227409	19	5.43807	5.2898	5.40349	5.36798	5.20148	5.11572	5.30904	5.40298	5.0898	5.13379	5.3036	5.47439
PVRL3-AS1	NR_045114	16957292	1.212	0.031	0.481	1.078	0.303	0.743	0.984	0.781	0.934	chr3	-	110612555	110790400	28	4.25185	4.38348	4.26223	4.32479	3.60971	3.81652	3.79776	3.84707	4.02659	3.83744	4.17599	4.24242
APOA1	ENST00000236850	16744723	1.212	0.042	0.501	1.02	0.865	0.965	0.965	0.609	0.864	chr11	-	116706467	116708666	16	5.71403	5.93142	5.78494	5.75676	5.79132	6.1676	6.16524	5.84996	5.69066	5.46065	5.89084	5.81416
	---	16722029	1.212	0.042	0.502	0.955	0.496	0.844	0.835	0.026	0.316	chr11	+	11591631	11595329	19	5.0993	5.262	4.95128	4.89001	4.91001	4.90763	4.93045	4.75513	4.7858	5.02794	5.16446	5.20255
	---	16682447	1.212	0.052	0.521	1.154	0.19	0.665	1.188	0.018	0.28	chr1	-	18493423	18505840	19	4.70172	4.76657	4.95033	5.01461	4.5258	4.67027	5.00112	4.60867	4.39235	4.66873	4.78874	4.82713
	---	17076976	1.212	0.053	0.522	1.068	0.446	0.821	0.906	0.202	0.603	chr8	-	49510018	49533578	22	5.97185	5.89155	5.89867	5.68045	5.73054	6.00278	6.03998	5.88366	5.75544	5.84302	6.20932	5.94353
	---	17042853	1.212	0.055	0.527	1.186	0.181	0.66	0.886	0.059	0.405	chr7	+	1114086	1117672	20	5.45197	5.46291	5.24959	5.31792	5.16159	5.26585	5.70952	5.20932	5.28246	5.47407	5.76198	5.5485
FAM47C	NM_001013736	17102508	1.212	0.066	0.539	1.035	0.743	0.933	0.888	0.185	0.585	chrX	+	37026432	37029739	11	4.43333	4.38627	4.38707	4.09029	4.17757	4.54455	4.30345	4.51628	4.19895	4.27842	4.6699	4.36225
	---	16956220	1.212	0.127	0.61	1.129	0.123	0.596	0.988	0.829	0.95	chr3	-	71834486	71835757	25	4.49077	4.56016	4.5652	4.44905	4.43902	4.64472	4.68411	4.74892	4.61745	4.63126	5.12584	4.67674
PPP1R14B	NM_138689	16739859	1.212	0.242	0.702	0.965	0.586	0.882	0.87	0.079	0.447	chr11	-	64011951	64016966	18	6.67873	6.7869	6.44267	6.62146	6.43317	6.57842	6.42802	6.48216	5.67925	6.33197	6.33421	6.23139
	---	16813822	1.211	0.013	0.416	1.073	0.466	0.831	0.975	0.718	0.909	chr15	-	101093557	101100057	13	3.84337	3.63582	3.71092	3.69698	3.71071	3.38275	3.55504	3.74219	3.86642	3.84581	4.14915	4.11532
	---	16881933	1.211	0.015	0.429	0.986	0.83	0.957	0.994	0.929	0.98	chr2	+	78315856	78354932	23	4.62038	4.65162	4.53313	4.72194	4.58095	4.68009	4.68657	4.5331	4.61255	4.55609	4.88708	4.83383
C11orf54	ENST00000528288	16730106	1.211	0.016	0.432	1.136	0.06	0.498	1.287	0.005	0.19	chr11	+	93474757	93497915	28	7.64797	7.5012	7.94206	7.93471	7.6435	7.67851	7.80779	7.8827	7.20853	7.17228	7.42692	7.50549
	---	16764830	1.211	0.025	0.464	1.159	0.067	0.514	0.917	0.162	0.561	chr12	-	52700400	52702155	23	5.58996	5.57769	5.51393	5.40316	6.95822	6.79226	7.02587	7.15086	5.49529	5.66045	5.86077	5.846
MIR130A	NR_029673	16724899	1.211	0.03	0.477	0.916	0.467	0.832	0.765	0.009	0.23	chr11	+	57408671	57408759	13	3.8693	4.10554	3.57393	3.62686	4.22602	3.86922	4.10479	3.73705	3.79367	3.6194	4.01963	3.94485
RP11-165H20.1	NR_003928	16668649	1.211	0.031	0.479	1.096	0.244	0.706	0.902	0.088	0.466	chr1	+	111823146	111828730	18	3.68554	3.63241	3.50772	3.5119	3.45257	3.60065	3.75568	3.56221	3.41597	3.44828	3.61197	3.80419
MYBPHL	NM_001010985	16690553	1.211	0.06	0.531	0.936	0.312	0.75	1.051	0.374	0.739	chr1	-	109834987	109849663	21	5.06616	5.02585	5.08099	5.15581	5.33301	5.25337	5.25582	5.14054	5.3113	5.02052	5.40499	5.47906
TAB3	ENST00000467136	17102393	1.211	0.06	0.531	0.967	0.638	0.899	1.14	0.11	0.495	chrX	+	30852740	30853417	13	3.98722	4.22573	4.28756	4.30404	4.39848	4.21072	4.30283	4.21072	4.284	3.98682	4.40046	4.42284
CCDC151	NM_145045	16868968	1.211	0.065	0.537	1.097	0.203	0.676	1.017	0.835	0.952	chr19	-	11530812	11546603	23	5.89608	5.62565	5.86063	5.71158	5.96478	5.7967	5.96433	6.06593	5.88286	6.16498	6.36615	6.23429
	---	16775755	1.211	0.076	0.548	1.027	0.698	0.919	1.072	0.301	0.686	chr13	+	89925457	89932494	18	3.36515	3.30498	3.51666	3.35284	3.19543	3.13113	3.10328	3.30184	3.40415	3.20792	3.44396	3.71986
	---	16920576	1.21	0.015	0.429	0.992	0.887	0.971	1.056	0.618	0.868	chr20	-	55305453	55306516	17	4.79148	4.48759	4.55893	4.8758	4.52477	4.61454	4.57512	4.54003	4.62593	4.69471	4.93648	4.93329
	---	17078856	1.21	0.015	0.429	0.83	0.032	0.431	0.955	0.404	0.757	chr8	-	88554214	88767946	21	4.72129	4.74888	4.69838	4.63943	4.65629	4.63487	4.27028	4.48316	4.86742	4.83309	5.15436	5.0956
SMG6	ENST00000544865	16839554	1.21	0.021	0.457	1.024	0.68	0.913	1.235	0.024	0.305	chr17	-	1963133	2207069	39	7.92294	8.0393	8.18263	8.38992	8.15877	8.09052	8.17233	8.1458	8.31953	8.18845	8.54421	8.51371
	---	16794652	1.21	0.022	0.46	1.007	0.912	0.978	0.906	0.154	0.552	chr14	-	74674902	74684477	18	5.29514	5.46152	5.2231	5.249	5.09104	5.09385	5.18044	5.02479	5.11835	5.00053	5.29471	5.37418
SLC3A2	NM_001012662	16725984	1.21	0.026	0.468	0.993	0.904	0.975	1.103	0.095	0.477	chr11	+	62623484	62656816	23	11.5426	11.5507	11.6899	11.6862	11.7264	11.6598	11.6785	11.6879	10.4451	10.61	10.7871	10.8175
	---	16886236	1.21	0.033	0.484	1.001	0.997	0.999	1.041	0.532	0.827	chr2	+	144557036	144577168	21	3.43924	3.47182	3.59982	3.42798	3.73641	3.41753	3.49706	3.65795	3.34359	3.4032	3.55137	3.74542
	---	16702363	1.21	0.041	0.5	1.055	0.632	0.897	0.927	0.217	0.615	chr10	+	8137923	8139176	17	3.76998	3.64972	3.59211	3.60725	3.45646	3.90763	3.69794	3.81966	3.59484	3.69156	3.81081	4.02482
FAM48B2	NM_001136233	17109830	1.21	0.043	0.504	1.025	0.754	0.936	1.045	0.73	0.914	chrX	-	24328979	24331432	11	5.07289	4.70362	5.14911	4.75415	4.80086	4.96031	5.01872	4.81216	4.67438	4.79966	4.90651	5.11819
DUSP10	NM_007207	16699533	1.21	0.049	0.518	0.988	0.831	0.957	1.159	0.16	0.559	chr1	-	221874762	221915518	22	5.79637	6.17036	6.17707	6.21496	5.72389	5.78503	5.72615	5.7476	6.90752	6.65299	7.02281	7.08726
	---	17064902	1.21	0.075	0.548	1.086	0.292	0.736	0.915	0.324	0.704	chr7	-	157074230	157075380	19	5.49232	5.23897	5.14016	5.33595	5.37722	5.1376	5.39875	5.35331	5.08658	5.41297	5.48546	5.56368
STARD5	ENST00000302824	16812406	1.21	0.076	0.549	1.446	0.001	0.103	1.191	0.037	0.35	chr15	-	81601394	81616524	27	7.01585	7.14802	7.4114	7.25549	7.99891	8.00692	8.47722	8.59266	7.66837	7.35485	7.84835	7.72402
ZNF837	NR_049780	16876132	1.21	0.078	0.553	0.914	0.167	0.646	0.817	0.017	0.277	chr19	-	58878990	58892389	25	6.66258	6.49726	6.31756	6.26127	7.05114	6.94467	6.88694	6.84901	6.24398	6.5197	6.75818	6.55452
SEC14L2	NM_033382	16928938	1.21	0.086	0.565	0.98	0.77	0.94	1.027	0.626	0.872	chr22	+	30792846	30821291	19	6.98679	6.9926	7.06536	6.99038	7.27814	7.32369	7.17982	7.36483	6.45412	6.69638	6.98482	6.71662
	---	17102652	1.21	0.087	0.568	1.06	0.365	0.781	0.988	0.821	0.948	chrX	+	39796557	39797694	23	6.0184	5.98733	5.97383	5.99794	5.85544	5.88427	6.02202	5.88613	6.0432	6.01548	6.48686	6.12272
	---	16748151	1.21	0.099	0.583	0.985	0.825	0.955	0.923	0.376	0.74	chr12	+	9499309	9500599	16	3.337	3.64126	3.31137	3.43598	3.21804	3.01577	3.11166	3.07791	3.93156	3.6518	3.93124	4.20174
	---	16730972	1.21	0.103	0.589	1.061	0.318	0.753	1.094	0.271	0.663	chr11	+	109817287	109843963	21	4.35518	4.1361	4.29596	4.45612	4.18484	4.17335	4.22951	4.30112	4.21559	4.40814	4.41235	4.7606
PRDM11	AK097878	16737584	1.21	0.116	0.601	1.07	0.26	0.715	1.006	0.936	0.982	chr11	-	45168194	45236289	21	4.30854	4.08671	4.22196	4.18966	4.45795	4.42612	4.56868	4.51097	4.45828	4.04087	4.56174	4.48772
	---	16945465	1.21	0.152	0.634	0.899	0.255	0.712	0.901	0.206	0.606	chr3	+	129831393	129838359	13	4.21963	4.13614	3.90007	4.15311	4.59137	4.26249	4.24195	4.30651	4.34278	3.97007	4.27027	4.5924
RFPL2	NM_001098527	16934187	1.21	0.173	0.653	1.04	0.744	0.933	1.015	0.872	0.964	chr22	-	32586422	32600718	11	4.9103	5.0569	5.18178	4.83024	4.72994	5.17987	5.13153	4.88971	4.98059	4.74879	4.90083	5.37856
LOC400794	ENST00000438275	16695868	1.209	0.014	0.423	1.048	0.543	0.865	0.91	0.221	0.619	chr1	-	165446078	165551392	25	4.26703	4.2577	4.00836	4.24368	4.3117	4.24865	4.47144	4.22409	4.2958	4.24913	4.5499	4.54212
GLTP	NM_016433	16769972	1.209	0.015	0.429	1.268	0.006	0.267	1.263	0.006	0.194	chr12	-	110288748	110318293	22	9.76818	9.77232	10.0517	10.1635	10.095	10.1021	10.4979	10.3856	10.3328	10.2618	10.5806	10.5626
FLT3LG	NM_001204502	16864129	1.209	0.018	0.448	0.956	0.428	0.813	0.938	0.315	0.698	chr19	+	49977466	49989488	23	7.37702	7.22713	7.22333	7.19614	7.73568	7.72309	7.65665	7.67168	8.56476	8.51927	8.76724	8.86401
SLC17A2	NM_005835	17016338	1.209	0.02	0.457	0.976	0.732	0.929	1.003	0.965	0.991	chr6	-	25912982	25930946	21	4.50849	4.43592	4.43035	4.52125	4.36743	4.48837	4.48358	4.30171	4.28457	4.28731	4.49657	4.62315
	---	16916858	1.209	0.021	0.458	1.099	0.282	0.73	1.091	0.145	0.541	chr20	-	3868886	3869515	24	6.80077	6.75602	6.93777	6.87097	6.25696	6.23331	6.22823	6.53491	6.08146	6.2052	6.44143	6.39244
LOC100507554	ENST00000431856	16908184	1.209	0.022	0.462	0.864	0.052	0.482	0.993	0.899	0.972	chr2	-	217343753	217363484	22	6.97605	6.94018	6.91754	6.97912	6.76018	6.60755	6.48766	6.45818	6.0211	5.97488	6.3409	6.20317
	---	16983013	1.209	0.024	0.464	0.95	0.482	0.838	1.073	0.333	0.709	chr5	+	7326177	7326722	21	4.51595	4.57137	4.53995	4.74892	4.48247	4.2621	4.28125	4.315	4.5016	4.41024	4.66664	4.79418
	---	17003668	1.209	0.027	0.469	1.147	0.089	0.55	0.886	0.125	0.517	chr5	-	178804532	178805762	15	5.84288	5.63937	5.61255	5.5225	5.64928	5.57018	5.90898	5.70567	5.62091	5.79234	5.97032	5.99182
PIR-FIGF	NR_037859	17109272	1.209	0.028	0.472	1.08	0.242	0.705	1.022	0.784	0.934	chrX	-	15363713	15511711	21	5.67556	5.94099	5.79351	5.88578	6.11233	6.18928	6.32048	6.20384	5.25424	5.39883	5.54945	5.65193
FAM98C	NM_174905	16861724	1.209	0.037	0.496	1.455	0	0.078	1.41	0.001	0.084	chr19	+	38893775	38899728	23	9.22338	9.19047	9.66923	9.7363	9.26544	9.27163	9.79107	9.82877	9.58283	9.59745	9.97388	9.75469
IHH	NM_002181	16908552	1.209	0.041	0.5	1.26	0.022	0.395	1.033	0.56	0.842	chr2	-	219919140	219925238	17	4.46349	4.41541	4.44487	4.52851	4.34195	4.47025	4.61601	4.86258	4.51224	4.28271	4.69147	4.65082
	---	16914548	1.209	0.041	0.501	0.999	0.997	0.999	0.986	0.848	0.956	chr20	+	46523123	46527679	12	4.19012	4.11801	4.24673	4.02158	4.29725	4.58977	4.86632	4.01874	4.18055	4.03961	4.28955	4.47816
	---	17087495	1.209	0.05	0.519	0.871	0.075	0.527	0.92	0.185	0.584	chr9	+	101945655	101947173	23	3.56992	3.51823	3.47905	3.36991	3.63767	3.44831	3.33421	3.35263	3.35626	3.34912	3.75955	3.49357
SAMD9	NM_017654	17059771	1.209	0.055	0.526	0.744	0.003	0.22	1.232	0.02	0.287	chr7	-	92728826	92747336	24	6.9562	7.14571	7.30903	7.39503	6.46903	6.31856	6.02207	5.91219	6.54856	6.27982	6.72693	6.64989
HIST1H1B	NM_005322	17016499	1.209	0.057	0.529	1.037	0.706	0.922	1.201	0.216	0.614	chr6	-	27834570	27835359	11	4.33338	4.39882	4.9264	4.33441	4.4939	4.55429	4.76197	4.38984	4.27764	4.37674	4.46692	4.73515
SLC6A11	ENST00000254488	16937626	1.209	0.064	0.536	1.07	0.251	0.71	0.985	0.838	0.953	chr3	+	10857885	10982419	27	3.80994	3.66289	3.81189	3.61769	3.85846	3.84243	3.95984	3.93614	3.66878	3.76232	4.13381	3.84451
	---	16965516	1.209	0.065	0.537	0.993	0.945	0.987	1.001	0.995	0.999	chr4	+	24667011	24670951	18	5.37942	5.25677	5.43741	5.20006	5.20508	5.5329	5.48691	5.23095	5.12725	5.43443	5.55697	5.55267
FAM92B	ENST00000539556	16828852	1.209	0.089	0.57	0.936	0.41	0.804	1.124	0.443	0.781	chr16	-	85131965	85146114	15	5.78166	5.89521	6.32667	5.68734	5.67635	5.78019	5.50578	5.75867	5.42944	5.79178	5.85503	5.91494
YPEL2	NM_001005404	16836528	1.209	0.098	0.582	1.084	0.258	0.713	1.641	0.002	0.145	chr17	+	57409053	57479095	16	5.99876	6.13112	6.58893	6.97157	6.69567	6.64468	6.88002	6.69448	6.96621	6.87279	7.00654	7.37989
DDX12P	NR_033399	16761148	1.209	0.099	0.583	1.273	0.33	0.762	0.964	0.84	0.953	chr12	-	9570287	9600768	8	7.39427	6.58001	6.99629	6.8711	6.07573	7.18051	7.1045	6.84694	7.40423	7.67206	7.95131	7.67246
COL5A2	NM_000393	16906352	1.209	0.1	0.586	1.058	0.35	0.772	0.953	0.477	0.8	chr2	-	189896622	190044605	31	4.30063	4.3813	4.35984	4.18343	4.16927	4.23766	4.25767	4.31189	4.20395	4.29414	4.71312	4.33307
DCDC2B	NM_001099434	16662018	1.209	0.174	0.653	1.199	0.022	0.397	0.915	0.351	0.722	chr1	+	32674695	32681797	21	5.1809	4.82903	4.88792	4.8663	5.09633	5.04893	5.40352	5.2667	4.71268	4.65134	5.21904	4.69256
C6orf25	ENST00000375810	17006801	1.209	0.606	0.884	0.889	0.093	0.555	0.86	0.229	0.625	chr6	+	31686371	31694491	26	3.46951	3.04047	2.9214	3.15516	3.63276	3.63041	3.39742	3.52816	2.89377	3.9666	3.07077	4.33737
FAM105A	NM_019018	16983373	1.208	0.015	0.429	0.914	0.184	0.662	1.062	0.318	0.7	chr5	+	14581884	14616289	22	7.85678	7.9382	7.94021	8.0282	7.44942	7.596	7.40087	7.38395	8.40124	8.37879	8.69092	8.63481
	---	16743086	1.208	0.018	0.446	1.122	0.09	0.551	0.999	0.991	0.998	chr11	-	86603256	86636079	24	4.95075	4.77587	4.82799	4.89651	4.8623	4.90753	5.09987	5.00123	4.96079	4.98558	5.29451	5.19691
MIR16-1	NR_029486	16779178	1.208	0.021	0.46	1.008	0.917	0.979	0.992	0.935	0.982	chr13	-	50623109	50623197	11	3.83891	3.68853	3.9317	3.57266	3.61287	3.686	3.52778	3.79499	3.7245	3.60578	3.9083	3.96782
C6orf130	ENST00000479950	17018995	1.208	0.022	0.46	0.9	0.108	0.579	1.056	0.437	0.777	chr6	-	41032517	41065526	29	6.97	7.17841	7.16682	7.13889	6.88694	6.976	6.79573	6.7624	6.69328	6.55897	6.88284	6.91458
RNU6-64	NR_046935	16773642	1.208	0.025	0.464	1.003	0.971	0.995	0.982	0.819	0.947	chr13	+	30855902	30856006	19	4.2526	3.99859	4.15216	4.04725	4.2984	4.10274	4.19686	4.2115	4.2244	4.07502	4.39838	4.44618
FNDC9	NM_001001343	17002176	1.208	0.026	0.468	0.999	0.988	0.998	1.162	0.19	0.591	chr5	-	156768607	156772729	23	5.1137	4.69368	5.16265	5.07637	4.92686	4.95665	4.91768	4.96342	4.92216	4.87717	5.2524	5.09339
KDM4B	NM_015015	16857282	1.208	0.03	0.478	1.384	0.002	0.174	1.685	0	0.028	chr19	+	4969124	5153609	14	7.76761	7.83238	8.50691	8.59851	8.33542	8.39044	8.91524	8.74932	7.70207	7.88575	8.08346	8.04954
LINC00482	NR_038080	16849816	1.208	0.046	0.512	1.121	0.11	0.583	1.091	0.448	0.783	chr17	-	79276624	79283048	17	7.08552	6.90677	7.33414	6.90879	6.93839	7.00827	7.20841	7.06783	6.91657	6.75292	7.01204	7.20279
	---	16975478	1.208	0.061	0.531	0.932	0.328	0.761	0.901	0.332	0.708	chr4	-	41773962	41774120	19	4.74698	4.64399	4.747	4.34164	4.57595	4.58451	4.37877	4.57936	4.29411	4.58791	4.72956	4.69896
TRAV14DV4	ENST00000390440	16781885	1.208	0.066	0.539	1.015	0.821	0.954	0.979	0.835	0.952	chr14	+	22392239	22392827	23	4.43055	4.53405	4.25499	4.64862	4.5204	4.58515	4.64503	4.50225	4.52544	4.22093	4.6204	4.6716
	---	17117542	1.208	0.099	0.583	1.286	0.004	0.248	1.269	0.02	0.287	chr11	-	65266414	65278498	14	9.03447	8.76543	9.2248	9.26402	8.70396	8.82089	9.14005	9.11106	8.62461	8.99979	9.04086	9.13042
KRTAP17-1	NM_031964	16844640	1.208	0.117	0.603	1.1	0.171	0.651	0.904	0.221	0.619	chr17	-	39471169	39471947	22	5.87354	5.60641	5.57559	5.61156	5.72164	5.56221	5.7689	5.79026	5.33588	5.67533	5.90337	5.65339
LOC154761	NR_015421	17063977	1.208	0.17	0.651	0.985	0.901	0.975	0.963	0.693	0.9	chr7	-	143509061	143533810	11	5.17031	5.53284	5.28552	5.31054	5.94936	6.31085	6.30924	5.90694	5.49177	5.26989	5.41866	5.88823
TRAV19	ENST00000390447	16781912	1.208	0.184	0.66	0.959	0.627	0.895	0.901	0.137	0.532	chr14	+	22475751	22476420	22	4.8616	4.91248	4.65726	4.81737	4.72258	4.7344	4.82931	4.50568	4.86337	4.7017	5.31719	4.79464
TSSK1B	NM_032028	16998937	1.207	0.014	0.423	1.032	0.651	0.904	0.988	0.825	0.949	chr5	-	112768251	112770728	18	4.5833	4.55747	4.50568	4.59975	4.61091	4.6326	4.77503	4.56144	4.23364	4.23133	4.48193	4.52803
NPY6R	NR_002713	16989568	1.207	0.016	0.432	1.058	0.348	0.771	0.913	0.281	0.672	chr5	+	137136882	137146440	15	3.67025	3.39186	3.42936	3.37128	3.19199	3.26558	3.33959	3.28245	3.13864	3.10302	3.42373	3.36126
SPANXN4	NM_001009613	17107462	1.207	0.016	0.433	1.04	0.659	0.906	0.999	0.992	0.998	chrX	+	142113704	142122488	14	4.29059	4.05538	4.11956	4.22415	4.42726	4.27005	4.26057	4.54778	4.25501	4.18249	4.48173	4.49695
	---	16780444	1.207	0.016	0.439	1.007	0.933	0.983	1.06	0.305	0.69	chr13	-	98714196	98716549	17	3.5857	3.5091	3.62498	3.63753	3.98598	4.10964	4.19353	3.92215	3.76763	3.81942	4.03422	4.0941
	---	17092321	1.207	0.02	0.457	1.035	0.631	0.896	1.015	0.789	0.936	chr9	-	7924794	7926107	19	3.3633	3.36218	3.3315	3.43744	3.32177	3.45395	3.52341	3.35144	3.46123	3.34088	3.67495	3.6697
MXD4	NM_006454	16973708	1.207	0.023	0.462	1.028	0.625	0.895	1.506	0.001	0.103	chr4	-	2249159	2264021	25	6.40529	6.24301	6.99362	6.83707	7.56769	7.52098	7.5792	7.58958	6.94774	6.82629	7.12161	7.19541
CEP164	NM_014956	16731695	1.207	0.024	0.464	1.027	0.72	0.925	1.229	0.061	0.411	chr11	+	117185273	117283984	32	6.88834	6.53265	7.03938	6.97791	7.57562	7.35502	7.44816	7.56037	6.99682	7.07566	7.37397	7.24203
FAM27L	NR_028336	16832307	1.207	0.024	0.464	1.229	0.027	0.417	0.932	0.47	0.796	chr17	+	21825370	21826499	10	4.49175	4.59757	4.26402	4.62246	4.49548	4.61036	4.96207	4.74018	4.41981	4.28328	4.59197	4.65317
HTR1F	NM_000866	16942919	1.207	0.03	0.477	1.067	0.346	0.771	1.03	0.724	0.912	chr3	+	88031726	88042919	17	4.20316	4.37939	4.46637	4.20316	4.44762	4.38968	4.59368	4.42925	4.5112	4.39052	4.65305	4.79093
	---	16807423	1.207	0.031	0.481	0.945	0.395	0.798	0.947	0.426	0.772	chr15	-	40745643	40746838	15	3.9382	3.85886	3.9092	3.73157	3.77016	3.92469	3.79801	3.7322	3.64018	3.78163	3.91972	4.04607
NDUFA13	ENST00000507754	16860047	1.207	0.036	0.492	1.02	0.761	0.937	1.149	0.079	0.449	chr19	+	19626596	19639863	23	7.60842	7.56678	7.88928	7.68553	7.8613	7.7512	7.76638	7.90415	7.89719	7.69048	8.04243	8.08994
	---	16864774	1.207	0.041	0.5	1.058	0.397	0.799	0.99	0.886	0.968	chr19	+	52452415	52484613	15	5.9884	5.95801	6.07792	5.83823	5.68104	5.84267	5.86796	5.81992	5.85658	5.898	6.26229	6.0357
	---	16993185	1.207	0.045	0.506	1.013	0.82	0.954	0.99	0.87	0.963	chr5	+	177366623	177410055	15	4.30634	4.40465	4.30027	4.38323	4.46296	4.40961	4.49469	4.41654	3.97172	4.17205	4.27321	4.41422
GLDN	NM_181789	16801075	1.207	0.045	0.507	1.05	0.408	0.803	1.081	0.275	0.665	chr15	+	51633713	51700210	29	5.35582	5.35062	5.36417	5.5661	6.28517	6.33569	6.34947	6.41341	4.72586	4.96663	5.14156	5.09368
SMARCA1	NM_003069	17113980	1.207	0.048	0.517	1.25	0.056	0.492	1.102	0.155	0.553	chrX	-	128580478	128657477	17	9.40079	9.48863	9.65389	9.51649	4.04042	4.01945	4.14917	4.55374	3.71527	3.92111	4.01375	4.16534
	---	17094920	1.207	0.05	0.519	1.064	0.381	0.79	1.067	0.418	0.766	chr9	-	75797125	75799444	11	2.94661	2.88541	3.14538	2.87564	2.96132	2.88367	3.10709	2.9186	2.91478	2.95075	3.07463	3.33311
SLA2	NM_032214	16918941	1.207	0.053	0.522	1.167	0.136	0.613	1.042	0.723	0.912	chr20	-	35240721	35274619	21	5.10055	5.25122	5.46175	5.00779	4.93548	5.26754	5.40977	5.2391	5.03165	5.29315	5.40088	5.46705
	---	16887003	1.207	0.055	0.527	0.916	0.425	0.812	1.103	0.107	0.491	chr2	+	162929766	162931679	19	4.89368	4.93516	5.08858	5.0244	5.38023	5.48344	5.08338	5.52567	4.673	4.88496	5.14127	4.96137
	---	16679593	1.207	0.059	0.531	1.119	0.153	0.63	1.194	0.022	0.299	chr1	+	245293033	245295590	20	3.99241	3.99086	4.31932	4.17666	4.0689	3.96239	4.27627	4.07865	4.02393	4.06866	4.45881	4.17546
KCNB1	ENST00000371741	16920150	1.207	0.069	0.541	1.083	0.196	0.669	1.026	0.783	0.934	chr20	-	47984946	48099184	24	6.06297	6.1778	6.32777	5.98668	6.11574	6.0424	6.1866	6.20186	5.53802	5.83875	6.00887	5.91271
ZNF860	NM_001137674	16938620	1.207	0.071	0.543	1.166	0.03	0.426	1.023	0.73	0.914	chr3	+	32023263	32033228	14	6.72999	6.61507	6.62464	6.78713	6.61098	6.66426	6.88456	6.83365	5.52524	5.73293	6.02314	5.7794
SGK2	ENST00000373100	16913915	1.207	0.099	0.584	1.045	0.601	0.887	0.931	0.437	0.777	chr20	+	42187608	42216877	27	4.70366	4.76805	4.46496	4.80056	4.94108	4.65115	4.89945	4.81864	4.33126	4.41491	4.83187	4.45748
	---	16743827	1.207	0.121	0.607	0.921	0.302	0.742	1.035	0.698	0.901	chr11	-	104316596	104480062	19	3.33949	3.01225	3.18417	3.26756	3.35185	3.13585	3.05455	3.19527	3.10143	3.0875	3.1528	3.57951
PGM5-AS1	AK098218	17094671	1.207	0.133	0.616	1.106	0.248	0.708	0.899	0.44	0.779	chr9	-	71012849	71014187	23	5.8776	5.48383	5.31874	5.73734	4.68607	4.80575	5.02925	4.75351	5.52703	5.40629	5.95546	5.52147
	---	16795460	1.207	0.174	0.653	1.043	0.524	0.857	0.975	0.686	0.897	chr14	-	84761936	84765469	17	3.83293	3.72711	3.68437	3.80328	3.89364	3.77398	3.95095	3.83776	3.80534	3.89594	3.86364	4.3797
	---	17116159	1.207	0.176	0.655	1.142	0.456	0.827	0.795	0.004	0.179	chrY	+	9559279	9596085	34	4.29699	4.35204	3.99897	3.98798	4.62183	4.0231	4.24087	4.78679	3.73578	3.78222	3.76699	4.29445
	---	17042888	1.207	0.248	0.708	0.986	0.857	0.963	0.815	0.007	0.209	chr7	+	1306989	1308903	22	4.5181	4.53042	4.21107	4.24768	4.58571	4.60915	4.44792	4.70699	4.20968	4.81624	4.90758	4.65999
LOC402269	XM_377941	17046371	1.207	0.282	0.732	0.929	0.459	0.828	0.845	0.077	0.445	chr7	+	63092986	63161735	10	4.63401	4.92284	4.49925	4.5718	4.43967	4.6112	4.5946	4.24445	4.67275	4.44033	4.48801	5.16816
	---	16866562	1.207	0.314	0.749	0.957	0.504	0.849	1.104	0.106	0.49	chr19	-	1037312	1039056	24	5.57214	5.57121	5.67546	5.75361	5.79326	5.6417	5.63877	5.67094	5.66203	5.52852	5.48235	6.25163
ZNF93	NM_031218	16860103	1.207	0.342	0.765	0.835	0.123	0.597	0.774	0.018	0.28	chr19	+	20011722	20046860	8	4.42423	4.12761	3.89294	3.91864	4.48021	4.22397	4.27145	3.91242	4.20821	4.03083	4.80222	3.98155
WDR54	NM_032118	16881687	1.206	0.014	0.423	0.998	0.968	0.994	1.083	0.178	0.577	chr2	+	74648805	74652882	35	8.50677	8.5513	8.67833	8.60984	8.45278	8.43567	8.46413	8.41771	8.45322	8.45423	8.71029	8.73812
	---	16748351	1.206	0.015	0.431	0.999	0.99	0.998	0.917	0.219	0.617	chr12	+	10658201	10675734	13	4.04736	4.00189	3.99206	3.80792	3.79627	3.67628	3.79202	3.67812	3.91694	3.88358	4.14356	4.19746
	---	16914986	1.206	0.016	0.433	0.941	0.43	0.814	1.048	0.414	0.764	chr20	+	54039581	54084752	20	3.5496	3.45694	3.60071	3.54282	3.80884	3.59965	3.68115	3.55321	3.30153	3.28272	3.52916	3.59463
	---	17086698	1.206	0.016	0.44	1.088	0.219	0.688	0.881	0.069	0.427	chr9	+	92731704	92767420	23	4.08751	4.01959	3.80905	3.93163	4.00403	3.97088	4.18726	4.03079	3.81146	3.89095	4.11944	4.12363
ITGA3	NM_002204	16835672	1.206	0.022	0.462	1.361	0.004	0.24	1.316	0.003	0.154	chr17	+	48133332	48167849	32	10.152	10.1444	10.478	10.6108	8.95702	8.7274	9.2637	9.30997	8.33126	8.28262	8.64059	8.51354
LOC728769	AF086472	16997498	1.206	0.029	0.476	0.939	0.45	0.823	1.353	0.032	0.334	chr5	-	77638189	77656331	18	5.16751	5.48235	5.9307	5.59038	5.64063	5.70492	5.43654	5.72606	5.68804	5.55961	5.95208	5.83544
	---	16806230	1.206	0.034	0.49	1.05	0.554	0.869	1.096	0.134	0.529	chr15	-	26902177	26903910	22	4.98089	5.06565	5.14141	5.16872	5.37021	5.20176	5.4772	5.23601	4.99784	5.19893	5.37295	5.36402
LOC100507300	NR_038907	16737503	1.206	0.035	0.491	0.997	0.963	0.992	0.866	0.07	0.429	chr11	-	43930839	43942494	28	3.54798	3.74703	3.41185	3.46701	3.43972	3.40372	3.3843	3.45141	3.32238	3.40606	3.7274	3.54176
LOC100130587	AK127527	16915963	1.206	0.035	0.491	1.069	0.577	0.878	0.931	0.432	0.775	chr20	+	61991340	62002529	22	5.21806	4.98754	4.87839	5.12139	4.86103	5.31354	5.0644	5.30246	4.9354	5.01252	5.33786	5.1496
	---	16783170	1.206	0.042	0.502	0.859	0.146	0.624	1.127	0.078	0.446	chr14	+	31889492	31922089	24	5.14466	5.04173	5.22753	5.30275	5.46946	5.46124	5.05289	5.43694	5.16019	4.93742	5.35211	5.28541
	---	16690922	1.206	0.044	0.504	1.031	0.621	0.894	0.923	0.299	0.685	chr1	-	112635477	112686569	21	3.76583	3.52861	3.51149	3.55358	3.52732	3.61867	3.65756	3.576	3.73614	3.53169	3.84406	3.96289
	---	16715083	1.206	0.053	0.522	1.045	0.5	0.847	0.959	0.66	0.886	chr10	-	71754382	71768162	22	4.68242	4.35416	4.53751	4.37956	4.58248	4.63215	4.59426	4.74818	4.47355	4.62001	4.92716	4.70586
	---	17016101	1.206	0.06	0.531	0.988	0.857	0.963	1.015	0.843	0.954	chr6	-	22589366	22594062	22	3.54085	3.28681	3.42074	3.44992	3.27004	3.15468	3.14591	3.24573	3.01016	3.18311	3.25237	3.48092
CTAGE7P	NR_044994	16710630	1.206	0.082	0.559	1.069	0.361	0.779	0.998	0.979	0.995	chr10	+	131904273	131907102	12	3.27486	3.14917	3.2969	3.12189	3.20958	3.098	3.16045	3.33821	3.05799	3.09716	3.51778	3.17783
TRAJ32	ENST00000390505	16782060	1.206	0.257	0.714	1.228	0.026	0.411	0.886	0.121	0.511	chr14	+	22978325	22978390	14	4.6634	4.87531	4.62022	4.56944	4.63113	4.74226	4.87849	5.08669	5.09119	4.57309	5.31367	4.89059
PGAM1	NM_002629	16769440	1.206	0.303	0.744	1.134	0.548	0.867	1.158	0.235	0.632	chr12	-	104424522	104426026	21	8.25983	7.90181	8.12906	8.45748	8.01386	7.1681	8.01335	7.53103	8.0827	7.93785	7.90939	8.65187
	---	16811168	1.205	0.015	0.429	0.953	0.518	0.855	0.962	0.559	0.842	chr15	-	69750281	69750488	13	3.19084	3.00746	3.06418	3.0225	3.1988	3.03128	3.13067	2.95955	3.02686	3.03498	3.27931	3.31969
ZNF788	NR_027049	16858607	1.205	0.016	0.433	0.913	0.235	0.699	0.988	0.85	0.957	chr19	+	12203078	12225499	16	4.091	4.27309	4.14683	4.18187	4.29126	4.3436	4.29641	4.07563	4.38577	4.34988	4.60895	4.6644
	---	16990094	1.205	0.017	0.442	0.979	0.769	0.939	1.071	0.362	0.73	chr5	+	139959252	139959377	15	2.85025	2.91179	2.86549	3.09395	2.71996	2.93918	2.78715	2.81133	2.73605	2.81351	3.05875	3.02962
TMEM30A	ENST00000230461	17020930	1.205	0.017	0.443	1.114	0.106	0.576	1.12	0.069	0.427	chr6	-	75962638	75994684	30	10.5998	10.6408	10.764	10.802	10.2312	10.3317	10.4576	10.4173	10.4351	10.4203	10.7397	10.6539
IGKV4-1	ENST00000390243	16882710	1.205	0.022	0.46	1.103	0.185	0.662	1.255	0.11	0.496	chr2	+	89184913	89185669	17	3.60456	3.67831	4.23547	3.70402	3.66575	3.83325	3.836	3.94751	3.69153	3.65686	4.00347	3.88225
BHLHE41	NM_030762	16762470	1.205	0.024	0.464	1.035	0.725	0.927	0.773	0.012	0.249	chr12	-	26272959	26278060	28	6.11453	6.36418	5.85927	5.87703	5.21155	4.8296	5.01996	5.12082	7.59518	7.52799	7.89485	7.76721
KCNG3	NM_133329	16896905	1.205	0.025	0.464	1.175	0.075	0.526	0.939	0.267	0.659	chr2	-	42669157	42721237	24	5.8784	5.92596	5.83658	5.7865	4.51027	4.7305	4.77102	4.93509	4.65365	4.80186	4.99337	5.00013
	---	16757535	1.205	0.027	0.47	1.205	0.036	0.443	1.221	0.044	0.368	chr12	+	115151616	115205762	12	4.25023	4.15769	4.35341	4.63074	4.12601	4.1388	4.51927	4.28418	4.18961	4.07498	4.45899	4.34275
	---	16965303	1.205	0.031	0.48	0.972	0.713	0.924	0.968	0.632	0.874	chr4	+	17484658	17487209	20	4.2702	4.35536	4.35998	4.17069	3.88099	3.99821	3.7795	4.01733	4.27785	4.17051	4.56859	4.41876
SEMA3E	NM_012431	17059292	1.205	0.034	0.487	1.071	0.245	0.707	1.119	0.286	0.676	chr7	-	82993222	83278479	22	4.43565	4.26406	4.33127	4.69246	3.84496	3.80971	3.93043	3.92274	3.56736	3.74195	3.96697	3.87982
LCN15	NM_203347	17100154	1.205	0.034	0.487	1.065	0.32	0.755	1.069	0.246	0.642	chr9	-	139654086	139660707	31	5.66463	5.72707	5.80929	5.7736	5.49445	5.61601	5.63637	5.65588	5.75097	5.61285	5.88104	6.02152
KLC1	AY180165	16789305	1.205	0.039	0.498	1.069	0.456	0.827	1.091	0.171	0.571	chr14	+	104177607	104179149	21	6.58841	6.61264	6.66458	6.78639	7.62529	7.37573	7.4881	7.70466	6.23984	6.43951	6.65305	6.56446
LPIN3	NM_022896	16913811	1.205	0.052	0.521	1.309	0.03	0.424	1.586	0	0.056	chr20	+	39969560	39989222	17	7.62216	7.72996	8.40795	8.27474	8.26053	8.5008	8.60261	8.93534	7.87224	8.11174	8.2064	8.3154
	---	16806516	1.205	0.09	0.572	0.955	0.451	0.824	0.863	0.059	0.407	chr15	-	30345145	30365267	14	4.78595	4.66848	4.58971	4.43952	4.87501	4.90842	4.76641	4.88203	4.26977	4.61118	4.7643	4.65428
PCDHB9	ENST00000239446	16990294	1.205	0.16	0.642	0.886	0.097	0.562	1.244	0.054	0.394	chr5	+	140571942	140575215	19	4.39869	4.03486	4.50146	4.56146	6.23479	6.07667	5.99256	5.97138	7.09231	6.6217	7.05265	7.19881
TRBV6-4	ENST00000390360	17063832	1.205	0.267	0.721	1.226	0.028	0.419	0.709	0.008	0.214	chr7	-	142250703	142251158	8	4.91256	4.66177	4.40619	4.17658	4.47498	4.71993	4.88023	4.90183	4.76896	4.45468	5.18432	4.5774
AGBL5	NM_021831	16878036	1.204	0.014	0.426	1	0.996	0.999	1.14	0.051	0.387	chr2	+	27265232	27293490	26	6.62586	6.52617	6.77119	6.75902	7.14452	7.11758	7.09148	7.17145	6.47129	6.48556	6.7384	6.75503
MIR617	NR_030348	16768004	1.204	0.015	0.429	0.885	0.082	0.539	1.081	0.198	0.598	chr12	-	81226312	81226408	23	3.43687	3.35586	3.47564	3.54257	3.60284	3.48462	3.39473	3.34149	3.29445	3.25033	3.54897	3.53187
VPS33B	NM_018668	16813372	1.204	0.015	0.429	1.054	0.366	0.782	1.297	0.002	0.137	chr15	-	91541646	91565833	21	8.75427	8.73809	9.12514	9.11755	8.76648	8.73628	8.845	8.80968	8.3381	8.36862	8.61125	8.63108
PCDHB2	ENST00000194155	16990257	1.204	0.016	0.432	0.843	0.083	0.539	0.905	0.104	0.487	chr5	+	140474227	140476964	20	4.4534	4.50158	4.36394	4.30345	4.86603	5.08419	4.84881	4.60887	8.47212	8.53178	8.77165	8.76867
KDM5D	NM_001146705	17117126	1.204	0.022	0.462	1.086	0.183	0.661	1.097	0.278	0.669	chrY	-	21865751	21906825	21	4.4213	4.70161	4.65524	4.73482	4.07534	4.14447	4.215	4.24323	4.06225	4.08435	4.27764	4.40415
	---	17006878	1.204	0.025	0.464	0.842	0.045	0.467	1.071	0.235	0.631	chr6	+	31789991	31795104	19	7.12248	7.17386	7.27927	7.21582	5.79898	6.00575	5.61419	5.69528	7.05761	7.1056	7.27905	7.42
CEP95	ENST00000556440	16837065	1.204	0.028	0.473	1.153	0.044	0.465	1.172	0.023	0.303	chr17	+	62502255	62534064	34	10.3674	10.2894	10.5641	10.5509	9.21613	9.26345	9.4015	9.48786	9.33487	9.2342	9.48629	9.61899
ZEB1	NM_030751	16703715	1.204	0.036	0.492	1.063	0.301	0.742	1.174	0.021	0.291	chr10	+	31607424	31821599	25	5.89748	5.85211	6.12815	6.08477	5.3063	5.28198	5.40066	5.36315	5.94235	6.07196	6.19655	6.35406
	---	16968312	1.204	0.041	0.5	0.947	0.418	0.809	1.127	0.108	0.493	chr4	+	80764256	80764382	16	3.35459	3.31336	3.41288	3.60199	3.312	3.4011	3.2047	3.35119	3.25858	3.12702	3.37037	3.55084
	---	17044174	1.204	0.06	0.531	0.915	0.237	0.701	0.984	0.774	0.931	chr7	+	22629324	22631241	17	4.15948	4.1292	4.06925	4.17263	4.17363	3.95767	3.93493	3.94032	3.94897	4.21139	4.29334	4.40273
FLJ20444	AK000451	17094437	1.204	0.061	0.532	0.997	0.977	0.996	1.078	0.324	0.704	chr9	-	66523532	66553911	18	4.29062	4.52116	4.55754	4.4731	4.45749	4.54688	4.72699	4.26842	4.2151	4.39552	4.46223	4.68343
TRIM46	NR_046327	16671671	1.204	0.068	0.539	1.346	0.007	0.295	0.88	0.062	0.414	chr1	+	155145873	155157447	24	5.98641	5.86102	5.72962	5.74701	5.33239	5.55526	5.95749	5.78886	5.29324	5.52849	5.77607	5.58183
IFIT3	NM_001031683	16707184	1.204	0.066	0.539	0.78	0.056	0.491	1.06	0.671	0.891	chr10	+	91087602	91100728	18	4.50236	4.84062	4.51597	4.99484	4.90449	4.55917	4.21405	4.53267	5.17017	5.10805	5.2607	5.55354
LOC100507417	ENST00000532943	16738018	1.204	0.078	0.551	0.972	0.638	0.899	1.093	0.181	0.579	chr11	-	47404544	47430741	22	3.65339	3.54509	3.67361	3.78074	3.93268	3.82936	3.81336	3.86628	3.81359	3.85241	3.93813	4.26443
RNY5P5	ENST00000410441	17005418	1.204	0.077	0.551	0.898	0.17	0.65	1.032	0.6	0.86	chr6	+	25192641	25192718	10	4.29497	4.15987	4.30791	4.23992	4.21666	3.99492	3.91531	3.98381	4.34927	4.20574	4.39845	4.69237
GPR182	ENST00000300098	16752695	1.204	0.11	0.595	0.825	0.034	0.438	1.075	0.553	0.839	chr12	+	57388230	57392225	16	5.22775	4.79437	5.24176	4.98797	5.37496	5.15552	5.03658	4.94029	5.02067	5.16388	5.54675	5.17437
	---	17076512	1.204	0.112	0.596	1.001	0.99	0.998	1.013	0.857	0.959	chr8	-	39267715	39274897	20	3.49387	3.50095	3.40244	3.62924	3.43756	3.48954	3.47977	3.4494	3.44395	3.50555	3.94019	3.54431
BASP1	NM_006317	16983451	1.204	0.116	0.601	1.136	0.119	0.592	0.893	0.317	0.699	chr5	+	17217669	17276943	8	5.62842	5.30836	5.15051	5.45882	5.08401	4.9599	5.10457	5.30636	5.03337	5.15572	5.16708	5.55701
	---	16896875	1.204	0.12	0.605	1.047	0.487	0.84	0.956	0.424	0.77	chr2	-	42329148	42329924	20	4.19447	4.18182	4.08004	4.16648	4.14953	4.05573	4.23731	4.10064	4.16442	3.98573	4.15499	4.53017
PRKAA2	NM_006252	16665182	1.204	0.133	0.616	0.984	0.776	0.942	0.988	0.925	0.979	chr1	+	57110990	57181008	21	7.10261	7.2043	6.84426	7.42564	3.99614	4.08782	4.04191	3.99324	4.15112	3.92234	4.49535	4.11505
KRTAP6-3	ENST00000391624	16922070	1.204	0.165	0.646	1.045	0.562	0.873	1.001	0.992	0.998	chr21	+	31964759	31965394	8	2.76793	2.6756	2.67385	2.77137	2.91663	3.15849	3.13527	3.06778	2.84513	2.78127	2.83323	3.32987
ANKRD5	NM_022096	16911394	1.204	0.184	0.66	1.216	0.026	0.411	1.225	0.007	0.212	chr20	+	9966736	10037410	22	8.76886	8.72672	9.03127	9.05038	5.10959	5.29615	5.43684	5.53354	4.78891	4.7501	4.7716	5.3031
SLC9A1	NM_003047	16683925	1.203	0.016	0.432	0.971	0.622	0.895	1.144	0.066	0.423	chr1	-	27425300	27493472	17	7.38732	7.52806	7.60956	7.69457	8.23763	8.14763	8.13773	8.16328	8.03518	8.03822	8.32908	8.27826
	---	16768894	1.203	0.016	0.44	0.934	0.448	0.822	0.82	0.032	0.334	chr12	-	96820978	96821264	18	4.72943	4.73894	4.32506	4.57111	4.41768	4.70315	4.54898	4.37514	4.40759	4.44436	4.66453	4.72081
	---	17083108	1.203	0.018	0.449	0.989	0.849	0.961	0.942	0.293	0.681	chr9	+	1045426	1049242	25	4.77686	4.81018	4.74128	4.67391	4.74476	4.68236	4.74384	4.6503	4.55242	4.64092	4.86977	4.8569
COLEC12	NM_130386	16853399	1.203	0.023	0.462	0.967	0.573	0.877	0.965	0.604	0.862	chr18	-	319355	500729	23	3.79245	3.65275	3.747	3.59565	3.76334	3.81042	3.78152	3.69525	3.53318	3.65673	3.83857	3.88612
IGHV7-81	ENST00000390639	16797611	1.203	0.024	0.464	1.172	0.151	0.628	0.974	0.655	0.884	chr14	-	107282792	107283280	13	3.86615	3.94209	3.91947	3.81271	3.55211	3.84402	3.77995	4.07343	3.59857	3.73629	3.95327	3.91626
GRXCR1	NM_001080476	16966432	1.203	0.026	0.467	0.99	0.897	0.973	0.935	0.292	0.68	chr4	+	42895283	43032675	20	4.52221	4.38238	4.32947	4.38128	4.39558	4.65409	4.4499	4.56975	4.31392	4.32553	4.6619	4.51184
OR2T6	NM_001005471	16679801	1.203	0.029	0.476	1.073	0.375	0.786	0.877	0.181	0.58	chr1	+	248550910	248551836	20	5.81407	5.55008	5.60427	5.38192	5.5235	5.70705	5.81167	5.62288	5.46821	5.62409	5.78259	5.84322
TSC22D3	NM_198057	17113147	1.203	0.029	0.477	1.111	0.102	0.571	1.12	0.072	0.435	chrX	-	106956451	107020572	45	6.27932	6.23726	6.39152	6.45147	6.19097	6.23529	6.33725	6.39284	6.21764	6.19443	6.3887	6.55718
SCRIB	ENST00000356994	17082263	1.203	0.032	0.482	1.336	0.002	0.181	1.274	0.003	0.162	chr8	-	144873090	144897549	31	8.11881	8.13643	8.44992	8.50246	7.78505	7.6732	8.15106	8.14387	8.32879	8.3966	8.71592	8.54381
PRLHR	ENST00000239032	16718836	1.203	0.038	0.497	1.144	0.05	0.478	1.013	0.876	0.965	chr10	-	120352916	120355160	23	5.47298	5.24462	5.48232	5.27318	5.26466	5.34429	5.50581	5.4907	5.30384	5.13541	5.42439	5.54916
	---	17058294	1.203	0.039	0.498	0.976	0.668	0.909	0.989	0.867	0.962	chr7	-	68689683	68895909	18	4.06599	4.10662	4.15889	3.98253	4.18321	4.16581	4.14861	4.13116	3.8019	4.0134	4.15243	4.19737
	---	16970173	1.203	0.042	0.502	1.186	0.197	0.669	1.152	0.253	0.649	chr4	+	120328235	120329039	20	6.28261	5.82096	6.17877	6.33226	5.99884	5.45891	5.97136	5.97907	5.85309	5.73209	5.96393	6.15522
CLP1	ENST00000533682	16724886	1.203	0.043	0.504	1.186	0.021	0.39	1.152	0.052	0.39	chr11	+	57405497	57429340	39	6.44451	6.54509	6.75475	6.64361	6.27588	6.33416	6.52402	6.57785	6.50235	6.48158	6.87215	6.64487
	---	17053794	1.203	0.043	0.504	0.96	0.599	0.886	0.957	0.574	0.848	chr7	+	153086676	153093207	16	4.48891	4.42987	4.25963	4.53022	4.60493	4.64851	4.4379	4.6974	4.52522	4.36051	4.62923	4.79049
	---	16906105	1.203	0.048	0.516	1.104	0.209	0.68	0.981	0.732	0.915	chr2	-	182286881	182290476	17	3.81816	3.80557	3.83257	3.73628	3.53289	3.59409	3.59101	3.82154	3.55602	3.79934	3.95686	3.93195
OSTM1-AS1	AF520419	17011393	1.203	0.051	0.52	1.029	0.723	0.927	0.874	0.129	0.521	chr6	+	108444719	108480599	21	5.35069	5.2838	5.26015	4.98508	5.09028	5.28455	5.32744	5.12873	4.9979	5.1385	5.22839	5.44129
	---	16755073	1.203	0.052	0.521	0.886	0.071	0.52	0.991	0.866	0.962	chr12	+	93396903	93413688	24	3.58996	3.58703	3.61718	3.53324	3.65008	3.56482	3.41851	3.44551	3.56102	3.53612	3.68677	3.94529
PPP1R1B	NM_032192	16833787	1.203	0.063	0.536	1.147	0.085	0.545	1.007	0.907	0.974	chr17	+	37783177	37792879	14	5.34416	5.26849	5.37828	5.2545	5.22584	5.31312	5.56455	5.37138	5.17202	5.23772	5.61229	5.33119
CLDN25	ENST00000453129	16731401	1.203	0.091	0.572	0.956	0.658	0.906	1.065	0.353	0.724	chr11	+	113650469	113651222	21	5.53672	5.44694	5.50019	5.66545	5.82189	5.48576	5.71215	5.46515	5.00295	5.33698	5.49886	5.37496
FUT6	NM_000150	16867558	1.203	0.097	0.58	0.849	0.093	0.555	0.792	0.007	0.213	chr19	-	5830621	5839742	17	6.2753	6.42404	6.00992	6.0145	6.51549	6.33863	6.05235	6.32692	6.31112	6.05597	6.31796	6.58225
DKFZp451B082	NR_033862	17025477	1.203	0.106	0.591	1.017	0.766	0.938	0.964	0.637	0.876	chr6	-	163759374	163768065	20	4.43173	4.20973	4.19223	4.34317	4.48411	4.46679	4.45758	4.54341	4.17305	4.50307	4.70672	4.50336
LOC100293977	ENST00000475182	17034731	1.203	0.14	0.622	0.961	0.535	0.863	1.032	0.746	0.92	chr6_mann_hap4	-	4082537	4091831	8	2.93556	2.91872	3.17101	2.77615	2.99457	2.89764	2.9446	2.83309	2.87427	2.65407	2.83309	3.22935
	---	16984414	1.203	0.201	0.672	1.196	0.135	0.612	1.014	0.8	0.94	chr5	+	42994639	42997566	18	3.66079	3.68735	3.65673	3.73097	3.68066	3.70655	4.18192	3.72229	3.4977	3.87566	4.16037	3.74662
PGA3	ENST00000325558	16725485	1.203	0.256	0.713	0.862	0.035	0.441	1.229	0.132	0.526	chr11	+	60970779	60980570	8	3.70248	4.15952	4.35188	4.10429	4.39253	4.3669	4.12525	4.20403	4.62413	3.96727	4.54668	4.57829
IER5L	NM_203434	17099027	1.202	0.016	0.432	1.165	0.067	0.512	1.02	0.73	0.914	chr9	-	131937831	131940540	24	8.60267	8.5678	8.67774	8.5513	7.85223	7.93237	8.00804	8.2164	7.9276	7.88585	8.15883	8.1875
ZBTB4	NM_020899	16840685	1.202	0.018	0.452	1.073	0.266	0.72	1.008	0.901	0.972	chr17	-	7362685	7387568	20	8.01373	8.02787	7.92778	8.13836	8.69345	8.58571	8.73427	8.74656	7.93734	8.02522	8.25345	8.24032
	---	16895054	1.202	0.019	0.453	0.997	0.966	0.993	0.969	0.564	0.844	chr2	-	21853420	21859181	21	3.18526	3.12165	3.133	3.08232	3.25566	3.15681	3.24137	3.16351	3.21987	3.30863	3.53871	3.51937
HOXB-AS2	ENST00000464382	16835423	1.202	0.021	0.457	0.967	0.668	0.909	0.925	0.526	0.825	chr17	+	46634624	46637695	25	3.58087	3.30631	3.54542	3.11715	3.73639	3.9985	3.81459	3.8245	3.35527	3.40192	3.69431	3.59355
PTP4A1	NM_003463	17009918	1.202	0.02	0.457	1.327	0.004	0.225	1.088	0.159	0.558	chr6	+	64231666	64293492	27	11.0888	11.0843	11.1649	11.252	10.5131	10.6525	11.0351	10.9458	10.8343	10.8951	11.0884	11.1701
LOC100130430	AK126997	16822649	1.202	0.022	0.46	0.981	0.754	0.936	0.939	0.596	0.858	chr16	-	1355571	1359414	21	5.11152	5.15554	5.2868	4.79914	5.18752	5.22868	5.11879	5.24179	4.81533	4.9361	5.15142	5.13268
CCDC82	NM_024725	16743527	1.202	0.022	0.462	0.887	0.09	0.551	1.045	0.436	0.777	chr11	-	96085929	96123087	33	7.15428	7.23532	7.2679	7.24722	6.96166	7.08279	6.81529	6.88409	7.56314	7.60228	7.90593	7.78932
LOC100129936	AK124820	16933406	1.202	0.024	0.464	1.191	0.053	0.483	0.806	0.028	0.323	chr22	-	27063656	27068617	19	5.89229	5.75333	5.39659	5.62664	5.58589	5.35507	5.77977	5.66505	5.65482	5.53944	5.90373	5.82315
	---	16988131	1.202	0.028	0.471	1.071	0.408	0.804	0.903	0.199	0.6	chr5	+	113589210	113589451	15	6.38109	6.35149	6.3403	6.09887	6.59765	6.38592	6.49461	6.68607	6.48342	6.54298	6.70507	6.85383
OR2M4	NM_017504	16679795	1.202	0.03	0.477	1.246	0.008	0.301	0.986	0.914	0.976	chr1	+	248402231	248403166	20	4.19491	3.73211	3.7602	4.12461	3.60423	3.70615	3.97842	3.96584	3.81548	3.66746	3.96364	4.04983
	---	16688195	1.202	0.031	0.48	0.897	0.284	0.731	1.031	0.611	0.865	chr1	-	65437908	65468159	25	3.22939	3.15904	3.18049	3.29529	3.5617	3.17957	3.17174	3.25457	3.22636	3.23714	3.40972	3.58518
MUC19	HM801842	16750002	1.202	0.034	0.487	1.068	0.287	0.733	1.065	0.271	0.663	chr12	+	40787197	40964632	81	3.97664	3.90347	4.0425	4.01877	3.95697	3.91363	3.98658	4.07367	3.97853	4.03014	4.36179	4.17908
MIR24-2	NR_029497	16869489	1.202	0.034	0.49	1.206	0.109	0.581	1.157	0.106	0.49	chr19	-	13945330	13947173	18	6.03826	6.09204	6.41436	6.13661	7.27129	7.55489	7.51825	7.8488	6.00041	6.06126	6.3869	6.20503
MIR635	NR_030365	16848095	1.202	0.04	0.498	0.89	0.102	0.572	0.996	0.967	0.992	chr17	-	66420592	66420689	12	4.43817	4.09288	4.13244	4.38625	4.33479	4.19195	4.06987	4.12062	4.03429	3.89978	4.14958	4.31583
	---	16942883	1.202	0.042	0.502	1.045	0.47	0.833	1.025	0.701	0.903	chr3	+	86174366	86174437	12	2.72866	2.87746	2.78895	2.8886	2.85974	2.93312	2.92331	2.99588	2.74985	2.71562	3.10812	2.88773
FLJ40852	NR_015392	17052392	1.202	0.043	0.502	1.163	0.042	0.46	0.989	0.872	0.964	chr7	+	141427784	141427948	8	6.32003	6.53054	6.39933	6.41943	6.66705	6.60704	6.91362	6.79592	6.37359	6.17246	6.58726	6.48919
	---	16894076	1.202	0.044	0.504	0.965	0.619	0.894	1.017	0.782	0.934	chr2	-	5950773	5952728	20	3.52179	3.45815	3.43349	3.59734	3.34136	3.55213	3.42208	3.36871	3.45937	3.42633	3.5953	3.82021
PCDH7	NM_032457	16965798	1.202	0.045	0.507	1.033	0.609	0.89	1.171	0.148	0.545	chr4	+	30722030	31148423	21	5.93217	6.16036	6.11343	6.4354	5.68076	5.82169	5.82527	5.77158	4.58158	4.80963	4.98348	4.93735
GH1	NM_000515	16847711	1.202	0.054	0.523	1.174	0.207	0.679	1.37	0.081	0.453	chr17	-	61994563	61996198	8	4.26368	4.17733	5.01539	4.33428	4.06844	4.53252	4.64826	4.41761	4.70783	4.78103	5.13457	4.88486
LOC647086	XR_132608	16825894	1.202	0.062	0.535	1.117	0.139	0.618	0.641	0.019	0.285	chr16	-	30831838	30833358	8	4.93635	4.63395	3.86928	4.41741	4.56505	4.53841	4.80867	4.61503	4.52744	4.25448	4.61702	4.69608
RABL2A	ENST00000465711	16884766	1.202	0.064	0.536	1.097	0.136	0.614	1.107	0.239	0.636	chr2	+	114384806	114400975	8	7.2626	7.13567	7.47793	7.21433	7.02845	6.97877	7.12335	7.1518	7.08736	7.34503	7.41712	7.54453
LOC100129476	AK098599	16681263	1.202	0.069	0.541	1.033	0.675	0.912	0.934	0.34	0.715	chr1	-	7110002	7111764	18	5.5092	5.5062	5.51659	5.30019	5.46525	5.27536	5.32954	5.50421	5.16706	5.4186	5.47385	5.64391
C10orf122	NM_001128202	16719325	1.202	0.094	0.576	1.015	0.837	0.958	0.862	0.037	0.349	chr10	-	127265091	127371713	28	4.72359	4.62524	4.49552	4.42285	4.00482	3.87881	3.87944	4.04574	3.99857	3.886	4.03745	4.37915
LOC401357	AK125790	17058026	1.202	0.095	0.577	1.118	0.13	0.605	0.935	0.328	0.706	chr7	-	56876811	56880467	11	6.48963	6.30588	6.33092	6.26983	6.60052	6.65186	6.69959	6.87544	6.27257	6.43884	6.78195	6.46007
	---	16762681	1.202	0.098	0.582	1.024	0.736	0.93	0.989	0.836	0.952	chr12	-	28974908	28978764	18	3.27028	3.26637	3.2205	3.28434	3.39239	3.18771	3.30307	3.34534	3.04641	3.20135	3.55822	3.22245
	---	16718121	1.202	0.106	0.59	1.027	0.708	0.922	1.11	0.179	0.578	chr10	-	105697904	105726769	25	5.86948	5.86941	5.90504	6.13305	6.59534	6.72106	6.60902	6.7842	5.17837	5.17913	5.63692	5.25243
SLC2A9	NM_001001290	16974250	1.202	0.114	0.6	1.023	0.838	0.958	0.99	0.92	0.977	chr4	-	9772777	10056560	16	4.33605	4.53293	4.60585	4.23301	3.78045	4.2448	3.99771	4.0933	4.11073	4.1661	4.20564	4.60073
LOC100506394	NR_044993	16776961	1.202	0.116	0.601	1.077	0.432	0.815	1.36	0.021	0.293	chr13	+	114567150	114569805	18	4.99223	5.38542	5.57017	5.69593	4.13758	4.36846	4.49712	4.22222	5.91318	5.53885	5.91555	6.06835
PLIN5	NM_001013706	16867334	1.202	0.115	0.601	1.116	0.104	0.574	0.913	0.177	0.577	chr19	-	4522543	4535208	20	6.51071	6.53152	6.30717	6.47064	6.34279	6.45058	6.57584	6.53448	6.31171	6.69886	6.82814	6.71507
	---	16661811	1.202	0.123	0.608	1.107	0.106	0.578	0.938	0.443	0.78	chr1	+	31333698	31335492	17	5.25741	4.97447	5.05816	4.98993	5.13972	5.16781	5.27907	5.32311	5.03914	5.11308	5.13649	5.54659
TPTE2P5	NR_038258	16778413	1.202	0.123	0.609	1.134	0.377	0.788	1.094	0.481	0.801	chr13	-	41371121	41495910	10	4.43711	3.91587	4.33669	4.27379	4.47296	4.96111	4.7083	5.08745	3.86099	3.63106	3.83687	4.18516
	---	16711299	1.202	0.297	0.74	0.911	0.178	0.657	0.992	0.882	0.967	chr10	-	4242829	4285981	17	3.31566	3.34611	3.36965	3.26805	3.40125	3.241	3.18391	3.18813	3.97785	3.72944	4.46015	3.77693
CCL3L3	ENST00000492788	16843627	1.202	0.301	0.742	1.074	0.516	0.854	0.85	0.374	0.739	chr17	-	34623842	34625731	8	2.49595	3.2777	2.61417	2.69079	2.50607	2.53154	2.39408	2.84985	2.7356	2.50799	3.23575	2.53741
	---	17072293	1.202	0.359	0.774	1.252	0.033	0.434	0.852	0.214	0.614	chr8	+	123683530	123683633	10	4.60024	5.09969	4.66094	4.57623	4.39406	4.44493	4.90089	4.58522	4.23448	4.39947	4.99746	4.16553
GPR25	ENST00000304244	16675695	1.201	0.017	0.44	1.125	0.13	0.606	0.818	0.043	0.365	chr1	+	200842083	200843306	15	6.44947	6.3977	5.99133	6.2781	6.16016	6.31038	6.48318	6.32826	6.0608	6.05671	6.35163	6.2934
	---	17014792	1.201	0.017	0.443	1.057	0.541	0.864	1.011	0.875	0.964	chr6	+	168643618	168663261	22	4.77767	4.58773	4.76534	4.63247	4.80226	4.93482	5.10545	4.79088	4.8214	4.76076	5.07108	5.03972
SNORD17	NR_003045	16917529	1.201	0.021	0.457	1.142	0.092	0.553	1.057	0.342	0.716	chr20	-	17943353	17943589	21	7.72663	7.83108	7.86662	7.85161	7.53225	7.38262	7.71851	7.5786	8.21267	8.10522	8.427	8.41858
	---	16731565	1.201	0.021	0.46	0.923	0.285	0.732	0.986	0.826	0.95	chr11	+	116191061	116191162	8	2.97049	3.14329	3.08436	2.98715	3.05168	2.94218	2.78585	2.97717	2.88947	2.99993	3.2215	3.19659
HSDL2	NM_032303	17088124	1.201	0.022	0.462	1.216	0.012	0.337	1.291	0.006	0.201	chr9	+	115142189	115234690	17	9.59018	9.54192	9.85037	10.017	9.49243	9.51717	9.82707	9.74588	9.96191	9.84924	10.1867	10.1515
	---	16966365	1.201	0.028	0.472	0.943	0.434	0.816	0.989	0.927	0.979	chr4	+	41752362	41759358	15	5.04271	4.58003	4.92115	4.66868	4.89654	4.8793	4.69096	4.91761	4.84483	4.9966	5.16652	5.2027
	---	16852539	1.201	0.028	0.474	0.876	0.093	0.556	0.999	0.996	0.999	chr18	+	54702544	54703800	19	4.03004	4.29766	4.01496	4.31133	4.77994	4.96706	4.72741	4.63734	4.17517	4.33423	4.52013	4.51769
QPRT	ENST00000395384	16817630	1.201	0.042	0.501	0.999	0.99	0.998	0.905	0.394	0.75	chr16	+	29690329	29709325	17	5.21196	4.78986	4.96262	4.75063	4.92468	4.78348	4.71652	4.98853	4.95479	5.03935	5.36161	5.16042
CGB2	ENST00000474913	16863963	1.201	0.051	0.519	0.892	0.292	0.736	0.927	0.216	0.615	chr19	+	49535130	49536495	10	6.28442	6.16938	6.13099	6.10326	4.98238	4.96896	5.02557	4.596	5.19391	5.33468	5.62991	5.42606
	---	17000669	1.201	0.055	0.527	0.961	0.637	0.899	0.894	0.215	0.614	chr5	-	139028584	139029313	23	5.4463	5.69626	5.50101	5.3184	5.42126	5.69491	5.57521	5.42521	5.22748	5.44187	5.52297	5.67493
DEFB108B	NM_001002035	16728529	1.201	0.076	0.548	0.901	0.113	0.587	1.097	0.389	0.748	chr11	+	71544246	71548756	11	4.07584	3.68818	3.9332	4.09777	3.93904	3.8604	3.71991	3.77889	3.91316	4.04411	4.09918	4.38514
	---	16719553	1.201	0.077	0.551	1.103	0.2	0.674	0.874	0.101	0.483	chr10	-	131170474	131179081	19	4.48868	4.66662	4.30562	4.46097	4.53182	4.61935	4.61574	4.81805	4.42107	4.49333	4.87714	4.56558
LRP5L	NM_182492	16933265	1.201	0.097	0.58	1.006	0.935	0.984	1.039	0.588	0.855	chr22	-	25747385	25801344	12	6.81237	6.76336	6.94927	6.73636	7.08407	6.95617	6.90541	7.15338	6.97267	7.33253	7.39535	7.43787
BPIFA1	NM_130852	16912776	1.201	0.104	0.589	1.025	0.722	0.926	0.92	0.343	0.717	chr20	+	31823801	31831115	29	4.36027	4.11799	4.21564	4.02357	4.38469	4.19356	4.33627	4.31211	4.01249	4.23967	4.24009	4.53917
	---	16813413	1.201	0.168	0.649	1.043	0.509	0.85	0.967	0.734	0.915	chr15	-	92706028	92715666	24	3.87858	4.21306	3.89584	4.099	3.89446	3.81441	3.97348	3.85658	4.07257	4.56847	4.57475	4.59392
CAPN3	ENST00000356316	16800058	1.201	0.377	0.785	1.338	0.105	0.576	1.254	0.154	0.552	chr15	+	42646538	42646651	8	4.99615	5.08897	5.05821	5.68091	4.63144	5.29835	5.5423	5.22759	5.86451	5.07621	5.53335	5.93582
NPR1	NM_000906	16671187	1.2	0.015	0.431	1.102	0.159	0.638	0.986	0.84	0.953	chr1	+	153651113	153666468	24	4.86505	5.07251	4.94624	4.95181	4.89099	5.02318	5.06315	5.13047	4.91504	4.91108	5.17184	5.17981
FAM171B	ENST00000304698	16888554	1.2	0.016	0.433	0.911	0.212	0.683	0.914	0.131	0.525	chr2	+	187558698	187630685	28	10.2881	10.3273	10.1487	10.2068	9.87352	9.90038	9.85554	9.65015	10.3513	10.3232	10.6165	10.5849
	---	16966438	1.2	0.016	0.436	1.058	0.422	0.81	1.037	0.577	0.849	chr4	+	43135884	43236973	22	3.6658	3.84586	3.80348	3.81299	3.69439	3.66453	3.66124	3.8625	3.53035	3.53134	3.81643	3.77137
PORCN	NM_022825	17103303	1.2	0.017	0.44	1.21	0.012	0.337	1.262	0.004	0.181	chrX	+	48367350	48379202	34	7.50917	7.58183	7.87385	7.88913	8.67997	8.63627	8.91536	8.95064	8.52286	8.46807	8.75986	8.75742
	---	16764492	1.2	0.02	0.457	1.18	0.047	0.474	1.006	0.918	0.976	chr12	-	50345295	50356707	22	6.1853	6.13858	6.17427	6.16514	5.7731	5.94675	6.15778	6.04033	5.84781	5.75776	6.08261	6.04891
MIR934	NR_030631	17107319	1.2	0.022	0.462	0.894	0.264	0.717	1.063	0.354	0.724	chrX	+	135633037	135633119	22	3.28015	3.11136	3.27441	3.29212	3.48678	3.40692	3.0974	3.47146	3.20194	3.31588	3.5076	3.53666
RN5S37	ENST00000365420	16780436	1.2	0.028	0.472	0.804	0.007	0.291	0.971	0.69	0.899	chr13	-	98015226	98015355	12	3.51696	3.7493	3.54411	3.63623	3.78008	3.77569	3.42299	3.50414	3.8838	3.74458	4.04383	4.11045
OR6T1	ENST00000321252	16745628	1.2	0.031	0.48	1.008	0.89	0.972	1.003	0.961	0.99	chr11	-	123813492	123814580	18	3.23443	3.41762	3.24666	3.41595	3.35979	3.25753	3.37036	3.27181	3.2625	3.43181	3.6019	3.61776
	---	17005414	1.2	0.038	0.497	1.055	0.507	0.85	0.965	0.541	0.832	chr6	+	25042067	25056892	24	3.38078	3.49267	3.37789	3.3937	3.35641	3.33847	3.56046	3.28754	3.14793	3.18882	3.33274	3.53078
KIAA1217	NM_019590	16703251	1.2	0.043	0.504	0.961	0.59	0.883	1.322	0.002	0.122	chr10	+	23983675	24837184	31	6.85362	6.8503	7.27525	7.2356	8.18151	7.94969	8.01094	8.00584	7.53683	7.36014	7.77881	7.64505
	---	16926762	1.2	0.049	0.518	0.957	0.606	0.889	0.891	0.148	0.544	chr22	+	16062157	16063236	16	4.2215	4.24929	3.95188	4.18607	4.43249	4.1263	4.21086	4.22256	4.03556	4.23989	4.46575	4.33578
	---	16836070	1.2	0.053	0.523	0.977	0.815	0.953	0.844	0.285	0.675	chr17	+	48774005	48774121	11	5.12047	4.91937	5.08825	4.46443	4.79406	5.04916	4.72827	5.04749	4.98856	5.21704	5.30981	5.42171
	---	16903856	1.2	0.061	0.532	0.977	0.735	0.93	1.035	0.526	0.825	chr2	-	154278130	154449801	16	3.39753	3.35613	3.46193	3.39259	3.45734	3.66603	3.52115	3.53375	3.17576	3.43584	3.61489	3.5226
ZNF558	NM_144693	16868254	1.2	0.065	0.539	0.955	0.435	0.816	1.048	0.402	0.756	chr19	-	8920382	8933565	16	7.49672	7.57111	7.59679	7.60527	7.21108	7.27127	7.15698	7.19324	7.82446	7.55977	8.01171	7.89901
	---	16740825	1.2	0.074	0.548	1.208	0.019	0.381	0.885	0.277	0.667	chr11	-	66326337	66327855	22	6.12841	5.78773	5.91566	5.64939	5.67374	5.75793	6.04967	5.92762	5.48709	5.78816	5.93538	5.86562
OR10H3	NM_013938	16859199	1.2	0.077	0.551	0.978	0.701	0.92	1.051	0.691	0.899	chr19	+	15852203	15853153	10	5.11806	4.58832	4.92929	4.92106	4.6236	4.64603	4.63796	4.56776	4.60014	4.71014	5.06766	4.769
ACPT	NM_033068	16864586	1.2	0.078	0.551	0.909	0.433	0.816	0.934	0.43	0.773	chr19	+	51293672	51298481	13	5.29574	5.19968	5.00473	5.29534	4.88361	5.14775	4.65959	5.09802	4.73947	4.90815	5.22194	4.95156
	---	16974491	1.2	0.091	0.573	1.094	0.521	0.856	0.849	0.13	0.523	chr4	-	15095391	15095718	18	8.31342	8.0293	8.06407	7.80606	8.03983	8.55241	8.59316	8.2565	8.11746	7.76936	8.20884	8.20344
	---	16751077	1.2	0.092	0.574	1.125	0.235	0.7	1.103	0.257	0.652	chr12	+	50552484	50556731	17	3.42112	3.32961	3.65701	3.37651	3.52198	3.37444	3.44883	3.78794	3.67124	3.72353	3.78736	4.13417
LOC641746	NR_033245	17046458	1.2	0.103	0.588	1.034	0.602	0.887	1.005	0.96	0.99	chr7	+	64042988	64044129	12	3.64995	3.35327	3.40526	3.61137	3.44264	3.34263	3.49664	3.38481	3.39375	3.59699	3.60183	3.91498
FADS3	NM_021727	16739165	1.2	0.104	0.589	1.272	0.004	0.235	1.128	0.094	0.476	chr11	-	61640991	61659523	21	8.89286	8.90954	9.15915	8.99085	8.4375	8.41395	8.79484	8.74996	9.12793	9.44547	9.45063	9.64781
	---	16853989	1.2	0.113	0.598	1.04	0.521	0.856	1.016	0.898	0.972	chr18	-	12228875	12234483	19	3.601	4.08423	3.97821	3.75317	4.12575	4.03284	4.1163	4.15355	3.98785	3.61281	4.12139	4.00438
	---	16721124	1.2	0.123	0.608	1.179	0.047	0.474	0.942	0.424	0.77	chr11	+	3943797	3943933	12	7.20102	6.97433	7.03958	6.96364	6.62115	6.50057	6.88126	6.71496	6.37253	6.78245	6.82533	6.85502
HFE2	NM_213653	16669787	1.2	0.13	0.613	1.052	0.393	0.797	1.007	0.917	0.976	chr1	+	145413095	145417545	22	4.17117	4.35854	4.22625	4.32416	4.29856	4.34808	4.42422	4.36841	3.95751	4.26313	4.52175	4.22522
PIM2	NM_006875	17110670	1.199	0.019	0.453	1.293	0.006	0.267	1.353	0.001	0.113	chrX	-	48770459	48776413	25	8.779	8.82116	9.27106	9.20037	8.69712	8.86128	9.1482	9.15223	9.34005	9.41829	9.6453	9.63668
	---	16686275	1.199	0.019	0.456	0.951	0.513	0.852	1.148	0.055	0.397	chr1	-	45224709	45241482	24	5.67919	5.57241	5.77618	5.87253	5.93893	5.74538	5.85116	5.68766	5.70622	5.75335	6.02911	5.95437
KCTD13	NM_178863	16825583	1.199	0.022	0.46	1.113	0.191	0.666	1.137	0.049	0.383	chr16	-	29917457	29937549	19	9.82876	9.77142	10.0072	9.962	9.95296	9.95516	9.98008	10.2381	9.57589	9.59899	9.90267	9.79539
	---	16949789	1.199	0.029	0.477	0.83	0.018	0.376	0.989	0.863	0.961	chr3	+	194353652	194366130	23	5.59744	5.48948	5.44757	5.60654	6.41298	6.38324	6.06811	6.18977	5.76336	5.60578	5.96218	5.93105
FSD1	NM_024333	16857163	1.199	0.048	0.517	1.245	0.066	0.512	0.969	0.596	0.858	chr19	+	4304591	4323843	20	8.81212	8.92421	8.85046	8.79619	5.911	6.33485	6.45778	6.42003	6.00183	6.06651	6.18229	6.41098
PRSS27	NM_031948	16823169	1.199	0.053	0.522	1.062	0.4	0.8	1.094	0.157	0.554	chr16	-	2762419	2770552	16	6.27022	6.21333	6.31647	6.42708	6.88069	7.08858	7.08251	7.06139	6.04297	6.29391	6.42215	6.43835
	---	16725888	1.199	0.077	0.551	0.967	0.761	0.937	1.017	0.883	0.967	chr11	+	62373633	62373877	18	3.20933	3.69271	3.43867	3.51285	3.78004	3.46265	3.74824	3.39658	3.52087	3.37665	3.57057	3.85027
	---	16997849	1.199	0.094	0.576	1.107	0.227	0.694	0.957	0.438	0.778	chr5	-	86398420	86398663	15	3.24507	3.24609	3.22645	3.13919	3.27854	3.21592	3.53061	3.25855	3.09341	3.30887	3.60353	3.32364
	---	17116820	1.199	0.104	0.589	1.015	0.857	0.963	0.869	0.033	0.337	chrY	-	7291095	7291199	12	3.09804	3.10861	2.92786	2.87283	2.83507	2.90678	3.03055	2.7532	3.02064	2.71158	3.23377	3.023
OR2L5	NM_001258284	16679773	1.199	0.16	0.642	1.165	0.065	0.512	1.02	0.856	0.958	chr1	+	248185250	248186188	10	3.89893	3.77504	4.09032	3.64254	3.81682	3.91747	4.18512	3.98961	4.31738	3.84371	4.31511	4.36975
MAGED4B	NM_001242362	17111025	1.199	0.548	0.863	1.094	0.462	0.83	1.016	0.942	0.984	chrX	-	51804923	51812368	29	3.70069	2.84985	3.02899	3.56835	3.46701	3.98962	3.86342	3.85346	3.10795	3.09119	4.03691	2.68668
SMPD1	NM_000543	16721375	1.198	0.017	0.443	0.913	0.154	0.631	1.218	0.03	0.328	chr11	+	6411644	6416228	26	6.63987	6.84486	7.08386	6.97024	9.60061	9.50369	9.42367	9.41616	7.78572	7.83624	8.0865	8.05768
SMOX	ENST00000379460	16911108	1.198	0.019	0.453	1.139	0.165	0.644	1.257	0.005	0.19	chr20	+	4101627	4168394	24	8.916	8.93839	9.29883	9.21548	8.43248	8.64766	8.60604	8.8503	8.98078	8.9385	9.25053	9.19005
RIMKLB	NM_020734	16747991	1.198	0.02	0.457	1.008	0.882	0.97	0.965	0.512	0.817	chr12	+	8834196	8935691	27	4.41789	4.50079	4.40292	4.41105	4.53612	4.44994	4.51097	4.50002	4.22007	4.29397	4.54436	4.49093
	---	16944259	1.198	0.022	0.46	1.001	0.995	0.999	0.94	0.579	0.85	chr3	+	115377380	115380126	23	5.61376	5.48798	5.68233	5.23847	5.53259	5.57106	5.57815	5.52653	5.34146	5.26691	5.60469	5.52544
LIME1	NM_017806	16916092	1.198	0.025	0.464	1.064	0.285	0.732	0.979	0.727	0.913	chr20	+	62367635	62370460	18	6.93294	6.97038	6.99013	6.85276	7.23781	7.2304	7.32323	7.32449	6.47338	6.3747	6.64223	6.72704
	---	16926289	1.198	0.025	0.464	1.095	0.143	0.621	0.888	0.227	0.624	chr21	-	45593932	45608380	20	4.68442	4.52742	4.59393	4.27549	4.72604	4.77878	4.87794	4.88886	4.58456	4.71825	4.90639	4.91925
F8	NM_000132	17115729	1.198	0.028	0.476	1.195	0.016	0.365	1.296	0.002	0.142	chrX	-	154064063	154255215	35	5.53991	5.53015	5.88532	5.93237	6.07189	6.12848	6.36512	6.34876	5.29356	5.1418	5.46413	5.49384
GOLIM4	ENST00000470487	16961308	1.198	0.031	0.479	1.24	0.008	0.304	1.322	0.004	0.171	chr3	-	167726465	167813763	28	8.81364	8.95336	9.24029	9.3328	10.5162	10.5315	10.8798	10.7872	9.5105	9.36466	9.65997	9.73743
	---	17045879	1.198	0.035	0.491	1.004	0.963	0.992	0.88	0.119	0.508	chr7	+	47622655	47630846	19	4.04427	3.99235	3.95172	3.71703	4.23074	4.01667	3.99515	4.26433	3.8176	3.9737	4.20919	4.10477
SUGT1P1	NR_003667	17093300	1.198	0.036	0.492	0.978	0.755	0.936	0.858	0.037	0.348	chr9	-	33503823	33511164	11	4.39446	4.42623	4.25548	4.12406	4.26908	4.43104	4.24433	4.39164	3.88919	4.07228	4.26724	4.21656
DLK2	NM_023932	17019378	1.198	0.047	0.515	1.169	0.047	0.473	0.868	0.032	0.335	chr6	-	43418090	43424370	20	6.98348	7.00055	6.76234	6.81351	6.28848	6.42449	6.63435	6.52783	6.19929	6.39084	6.62024	6.49132
BMP1	ENST00000520970	17066523	1.198	0.053	0.522	1.107	0.186	0.663	1.129	0.059	0.405	chr8	+	22022249	22069839	21	7.30407	7.31528	7.44684	7.5225	7.41046	7.46482	7.47667	7.69342	6.71946	6.52517	6.80528	6.96211
RNU6-56	NR_046930	16774158	1.198	0.061	0.532	0.927	0.279	0.728	0.98	0.736	0.916	chr13	+	39353561	39353653	10	3.41233	3.2981	3.36716	3.28516	3.42283	3.41697	3.40301	3.21589	3.38965	3.57278	3.84298	3.64105
TMEM204	NM_024600	16814738	1.198	0.072	0.544	1.048	0.509	0.85	0.948	0.441	0.78	chr16	+	1584231	1605243	19	4.93467	4.73076	4.75237	4.75916	4.60211	4.80425	4.74625	4.79555	4.58264	4.88047	5.00638	4.97816
	---	16711517	1.198	0.076	0.549	0.977	0.782	0.943	0.936	0.271	0.662	chr10	-	6163691	6168004	20	5.05106	5.07375	5.02176	4.91255	5.10711	5.16414	4.95049	5.2537	4.95185	5.2392	5.29797	5.41418
PRM3	NM_021247	16823874	1.198	0.105	0.59	1.147	0.185	0.663	0.864	0.156	0.554	chr16	-	11367141	11367452	20	6.1628	5.94045	5.69617	5.98575	5.49687	5.83804	5.95605	5.7754	5.64872	5.92645	6.17367	5.92374
FXYD3	NM_001136007	16860888	1.198	0.107	0.592	1.259	0.079	0.533	1.374	0.002	0.124	chr19	+	35606732	35615228	18	6.41347	6.33248	6.77371	6.88923	7.06346	6.94524	7.09825	7.57533	5.03575	5.26028	5.25752	5.55999
ZNF705D	NM_001039615	17065842	1.198	0.126	0.61	1.078	0.252	0.71	0.886	0.326	0.705	chr8	+	11946847	11973025	10	5.16515	5.53357	5.00934	5.3401	5.41515	5.55403	5.58032	5.60719	4.91845	5.13018	5.10714	5.46439
	---	16774110	1.198	0.146	0.629	1.054	0.368	0.783	0.883	0.053	0.394	chr13	+	38444084	38446356	22	5.65253	5.7157	5.51997	5.4904	5.60666	5.55432	5.64607	5.66705	5.44878	5.68653	6.0196	5.63768
MIR1180	NR_031591	16842264	1.198	0.172	0.653	0.937	0.302	0.743	0.973	0.608	0.864	chr17	-	19247819	19247887	12	5.97533	5.98576	5.92513	5.95837	6.26456	6.14458	6.11545	6.10494	5.38053	5.74599	5.99208	5.65637
	---	17084901	1.198	0.283	0.732	0.923	0.207	0.679	1.067	0.401	0.755	chr9	+	36307039	36315276	18	4.0989	3.9625	4.01667	4.23279	4.01727	4.09087	3.90575	3.97264	4.08792	3.71846	4.45383	3.87359
MIG7	DQ080207	16689734	1.197	0.017	0.44	0.988	0.883	0.97	0.986	0.86	0.96	chr1	-	94218480	94241000	23	4.5307	4.79611	4.57814	4.70714	4.13914	4.02245	4.20875	3.91693	3.8846	3.91557	4.1497	4.17089
C6orf141	ENST00000529246	17009502	1.197	0.017	0.44	0.962	0.609	0.89	1.172	0.096	0.478	chr6	+	49518113	49529620	25	4.96518	5.2419	5.26727	5.39766	4.06518	4.2053	3.97321	4.18437	4.20907	4.17362	4.44592	4.45683
	---	17069114	1.197	0.017	0.44	1.099	0.149	0.628	1.017	0.892	0.969	chr8	+	57942969	57965702	18	3.22789	3.59585	3.26045	3.61055	3.26197	3.33503	3.39359	3.47566	3.44815	3.43267	3.71272	3.68683
	---	16971097	1.197	0.017	0.444	1.021	0.737	0.931	1.094	0.179	0.578	chr4	+	144874788	145047512	18	4.1735	4.07877	4.31703	4.19356	4.15316	4.06325	4.18757	4.08886	4.18157	4.15694	4.40667	4.45003
MOS	NM_005372	17077327	1.197	0.018	0.453	0.921	0.261	0.715	1.087	0.484	0.803	chr8	-	57025501	57026541	17	4.81518	4.43321	4.8988	4.59104	4.73158	4.77776	4.53743	4.73515	4.63689	4.70743	4.93192	4.93226
	---	16662936	1.197	0.02	0.457	1.144	0.086	0.545	0.942	0.374	0.739	chr1	+	40289924	40303684	21	4.29182	4.45147	4.24201	4.32965	4.33611	4.53707	4.62038	4.6418	4.29162	4.20246	4.51292	4.4988
	---	16749577	1.197	0.02	0.457	1.073	0.355	0.775	1.037	0.744	0.919	chr12	+	29193463	29209554	22	3.52334	3.94669	3.70513	3.86906	3.55676	3.35023	3.49691	3.6134	3.58591	3.66911	3.88095	3.89236
APBB3	NM_133174	17000756	1.197	0.02	0.457	1.513	0.016	0.363	1.359	0.003	0.154	chr5	-	139937853	139973337	25	6.63983	6.54196	7.11651	6.95208	7.01709	7.29604	7.49554	8.01094	6.82676	6.80465	7.11313	7.03613
RPS10P7	NR_026667	16675787	1.197	0.022	0.462	0.839	0.03	0.424	1.097	0.164	0.563	chr1	+	201487831	201499602	19	3.62089	3.75683	3.7902	3.85439	4.04885	4.10273	3.90341	3.74018	3.60906	3.54614	3.88008	3.79268
NINJ1	NM_004148	17095959	1.197	0.023	0.462	1.454	0.002	0.166	1.646	0	0.03	chr9	-	95883771	95896570	19	7.78125	7.82779	8.48173	8.56463	7.48895	7.66006	8.19844	8.03148	8.14612	8.06132	8.39833	8.32675
	---	16746013	1.197	0.024	0.464	0.883	0.062	0.504	1.027	0.723	0.912	chr11	-	128485760	128491711	17	4.34592	4.16469	4.39223	4.19725	4.10198	4.16892	3.96757	3.9432	4.0676	3.95872	4.30031	4.24683
GRIN1	ENST00000371561	17091610	1.197	0.027	0.469	0.943	0.472	0.834	0.908	0.2	0.601	chr9	+	140032842	140063214	27	6.26068	6.07427	5.96672	6.0883	5.48381	5.76077	5.5636	5.51184	5.38544	5.52414	5.70818	5.71966
	---	16946611	1.197	0.029	0.477	1.035	0.68	0.913	1.043	0.445	0.782	chr3	+	142884490	142884579	12	2.71177	2.77038	2.82161	2.78171	2.70006	2.7397	2.62441	2.91245	2.65769	2.78623	2.93985	3.02112
AMZ1	NM_133463	17043072	1.197	0.034	0.49	1.045	0.485	0.839	0.862	0.03	0.328	chr7	+	2719156	2815134	24	6.0151	5.94724	5.78694	5.74494	5.78716	5.91757	5.8992	5.93248	5.73303	5.75329	6.09349	5.91308
	---	16937832	1.197	0.051	0.519	1.37	0.01	0.32	0.951	0.503	0.812	chr3	+	13054481	13057307	19	4.54362	4.45228	4.54035	4.31003	4.23215	4.52371	4.92865	4.73508	4.52097	4.37162	4.80013	4.61147
	---	16898456	1.197	0.052	0.521	1.143	0.051	0.478	0.971	0.687	0.898	chr2	-	66924257	66930359	21	4.71446	4.46513	4.53927	4.55346	4.37165	4.3948	4.53761	4.61462	4.55127	4.42567	4.64285	4.85241
ACHE	NM_015831	17060791	1.197	0.055	0.527	1.268	0.011	0.327	1.184	0.03	0.328	chr7	-	100487615	100494594	27	6.09619	6.00889	6.36241	6.23132	5.94216	5.77488	6.14443	6.25758	6.82307	6.5707	6.96925	6.94487
RNF112	NM_007148	16832084	1.197	0.056	0.528	0.999	0.991	0.998	0.945	0.632	0.874	chr17	+	19314491	19320589	26	5.70149	5.43726	5.69136	5.28562	5.47256	5.47463	5.66612	5.27781	5.14949	5.40275	5.51918	5.55302
RNY3P6	ENST00000390895	16780611	1.197	0.064	0.536	0.91	0.43	0.814	0.962	0.48	0.801	chr13	-	100188573	100188650	9	3.59102	3.52641	3.48353	3.52184	3.55716	4.03338	3.74018	3.57797	3.34051	3.6129	3.70959	3.76319
	---	16754841	1.197	0.063	0.536	0.958	0.481	0.837	1.006	0.915	0.976	chr12	+	85306655	85386508	17	2.72514	2.81553	2.78237	2.77518	2.73	2.77638	2.64342	2.73942	2.62619	2.79447	2.86039	3.07898
	---	16733329	1.197	0.065	0.539	1.128	0.233	0.698	0.868	0.051	0.387	chr11	+	126862348	126865354	24	5.38584	5.24604	5.13062	5.09338	5.08694	5.46318	5.47172	5.42566	5.06141	5.30154	5.36712	5.51625
NBPF22P	NR_003719	16986965	1.197	0.066	0.539	1.289	0.027	0.416	0.921	0.17	0.57	chr5	+	85578262	85593362	9	3.51595	3.47037	3.41018	3.34099	3.31499	3.19486	3.45047	3.79226	3.34887	3.31645	3.73123	3.45113
	---	16935991	1.197	0.07	0.543	1.071	0.394	0.798	0.847	0.07	0.43	chr22	-	45659261	45664778	22	5.71913	5.72106	5.61788	5.34491	5.41263	5.67464	5.68011	5.60587	5.53494	5.24205	5.64872	5.64731
TM6SF1	NM_023003	16804062	1.197	0.075	0.548	1.066	0.385	0.792	0.975	0.651	0.883	chr15	+	83776159	83806111	21	3.57557	3.47944	3.50821	3.47335	3.45207	3.66416	3.61881	3.68225	3.58313	3.47604	3.64638	3.92994
MS4A14	NR_049734	16725227	1.197	0.077	0.551	1.037	0.625	0.895	1.001	0.986	0.996	chr11	+	60163487	60185229	28	3.32472	3.20034	3.38743	3.14146	3.28341	3.39024	3.28523	3.49243	3.18635	3.37879	3.42002	3.66432
LOC100289388	AK124949	16729475	1.197	0.084	0.563	0.878	0.152	0.629	1.109	0.1	0.482	chr11	+	77850806	77886582	15	4.52449	4.52263	4.71984	4.62586	4.61751	4.86339	4.64192	4.46356	5.60874	5.93063	6.013	6.04394
NTF4	NM_006179	16874214	1.197	0.089	0.569	0.996	0.955	0.99	1.222	0.024	0.305	chr19	-	49559050	49568333	9	6.03287	5.90864	6.17374	6.34487	6.22765	6.15291	6.27646	6.09297	6.42803	6.75868	6.88209	6.82363
TREML4	NM_198153	17008451	1.197	0.125	0.609	0.997	0.959	0.991	1.046	0.581	0.851	chr6	+	41196062	41206620	12	4.89669	4.61457	4.78503	4.85676	4.79205	4.65265	4.68221	4.75293	4.39386	4.64647	4.94093	4.61923
TC2N	NM_152332	16795943	1.197	0.134	0.617	0.901	0.113	0.587	0.909	0.127	0.521	chr14	-	92246095	92333880	30	8.9702	9.04888	8.90667	8.83669	10.235	10.2125	10.1199	10.0285	4.52535	4.5387	4.57887	5.00345
	---	16672706	1.197	0.148	0.631	1.015	0.79	0.946	0.945	0.342	0.717	chr1	+	161054255	161057361	23	4.87048	4.88774	4.8576	4.73581	4.78317	4.73168	4.77816	4.78017	4.45084	4.83319	5.02308	4.78165
EVPLL	NM_001145127	16831844	1.197	0.25	0.708	1.048	0.473	0.834	0.765	0.002	0.137	chr17	+	18281079	18292961	9	6.12496	6.0734	5.69346	5.73101	5.79081	5.85714	5.95577	5.82533	5.81045	5.21012	5.68245	5.85537
NMB	NM_021077	16812824	1.196	0.017	0.443	0.837	0.019	0.38	1.048	0.437	0.777	chr15	-	85198360	85201802	22	6.91992	7.04652	7.03494	7.06611	7.58805	7.49048	7.29474	7.27221	8.97506	8.9756	9.21196	9.25548
FAM19A5	NM_015381	16931532	1.196	0.017	0.443	1.167	0.062	0.504	1.061	0.322	0.703	chr22	+	48885272	49262410	25	5.17395	5.06973	5.17559	5.24064	5.18561	5.01237	5.25663	5.38666	4.95255	4.94094	5.22246	5.18632
MBD6	NM_052897	16752965	1.196	0.024	0.464	1.163	0.037	0.444	1.275	0.005	0.191	chr12	+	57914493	57923931	22	6.92871	6.9964	7.36629	7.25841	7.59929	7.53011	7.74236	7.82216	7.29119	7.40613	7.61011	7.60244
PAEP	ENST00000479141	17091128	1.196	0.028	0.472	0.984	0.814	0.953	0.93	0.435	0.776	chr9	+	138453602	138458801	16	3.99351	4.30415	3.97399	4.11642	4.2024	4.20708	4.29124	4.06979	3.91786	3.89751	4.23697	4.09497
LRRC6	ENST00000519595	17081323	1.196	0.029	0.476	0.901	0.15	0.628	0.926	0.184	0.583	chr8	-	133584320	133687838	34	7.4167	7.48286	7.3465	7.33045	6.35853	6.20904	6.08887	6.17945	5.8403	5.83969	6.17243	6.02343
LOC643072	ENST00000418474	16886860	1.196	0.029	0.477	1.006	0.915	0.978	1.231	0.031	0.332	chr2	+	160465681	160473599	20	6.12887	5.9293	6.24252	6.4155	7.03963	7.0368	6.99789	7.09668	6.07236	6.22023	6.39328	6.41486
	---	16741902	1.196	0.037	0.496	1.018	0.78	0.943	1.053	0.395	0.751	chr11	-	72920555	72929202	18	4.26889	4.16909	4.33959	4.24816	4.25074	4.38966	4.38553	4.30676	4.47645	4.29372	4.62189	4.66439
	---	16684851	1.196	0.039	0.498	0.984	0.883	0.97	1.01	0.892	0.969	chr1	-	33603694	33606476	17	5.57828	5.35839	5.52323	5.44156	5.295	5.68156	5.6102	5.31837	5.64265	5.49817	5.89656	5.76103
BMX	NM_203281	17101698	1.196	0.047	0.514	0.923	0.196	0.669	0.977	0.706	0.904	chrX	+	15482369	15574652	39	3.68584	3.79873	3.76	3.65794	3.74315	3.79531	3.67811	3.63093	3.69491	3.72003	3.85348	4.07815
ZNF197-AS1	ENST00000447691	16952734	1.196	0.049	0.518	0.959	0.554	0.869	1.188	0.074	0.44	chr3	-	44658620	44666289	15	4.36765	4.60365	4.64086	4.82641	4.88621	4.72041	4.81253	4.67119	4.05742	4.27358	4.38273	4.46381
PTCH2	ENST00000372192	16686297	1.196	0.051	0.519	1.061	0.369	0.783	0.947	0.505	0.814	chr1	-	45285516	45308735	19	6.21779	6.0194	6.14566	5.93327	6.11479	5.96617	6.12522	6.12522	6.04787	6.21098	6.47477	6.30094
ADAMTS16	NM_139056	16982870	1.196	0.06	0.531	1.075	0.277	0.726	1.061	0.356	0.726	chr5	+	5140443	5320417	22	5.22183	5.22344	5.38841	5.22803	4.74638	4.60327	4.76969	4.78698	4.89421	4.62962	5.03507	5.00575
	---	16910150	1.196	0.064	0.536	1.06	0.453	0.825	0.971	0.662	0.886	chr2	-	241375118	241401918	17	6.47612	6.43749	6.32007	6.50959	6.69061	6.44044	6.67066	6.62826	6.12456	6.37769	6.45535	6.56265
	---	16994696	1.196	0.088	0.568	0.984	0.883	0.97	1.069	0.241	0.638	chr5	-	18965970	19142455	14	3.95449	3.90638	4.04699	4.0054	3.74108	4.22477	3.94477	3.97284	4.07637	3.81225	4.30214	4.10273
	---	16660309	1.196	0.101	0.587	1.123	0.082	0.538	0.949	0.378	0.741	chr1	+	20480831	20487061	16	5.27287	5.15721	5.12778	5.15151	5.12944	5.12943	5.33863	5.25327	5.14882	5.46931	5.48648	5.64831
MIR30C1	NR_029833	16663131	1.196	0.131	0.613	0.984	0.793	0.947	0.893	0.483	0.802	chr1	+	41222956	41223044	14	4.5278	4.53	4.02007	4.71255	4.42717	4.52543	4.47991	4.42736	4.53725	4.5902	4.61576	5.02745
LOC646778	ENST00000565978	16851795	1.196	0.174	0.653	1.069	0.337	0.767	1.094	0.161	0.56	chr18	+	29265049	29266701	23	5.39761	5.46388	5.50416	5.61725	5.56536	5.41154	5.6352	5.53421	5.6032	5.16989	5.7626	5.52725
BSDC1	NM_001143888	16684700	1.195	0.017	0.441	1.05	0.538	0.863	1.27	0.004	0.169	chr1	-	32830704	32860332	31	8.18439	8.22215	8.51971	8.57735	8.89786	8.93087	8.85103	9.11828	8.74375	8.74568	8.99648	9.00664
BBS2	NM_031885	16826718	1.195	0.017	0.444	0.964	0.534	0.862	1.276	0.003	0.151	chr16	-	56518259	56554008	32	8.88729	8.88082	9.23453	9.23759	9.80052	9.74825	9.75208	9.69132	9.11816	9.11792	9.39229	9.35705
RIOK3	NM_003831	16851443	1.195	0.023	0.464	1.239	0.008	0.304	1.55	0.001	0.1	chr18	+	21032787	21063104	25	9.23881	9.46463	9.92859	10.039	9.56202	9.56472	9.91986	9.82491	9.39199	9.33444	9.57392	9.66558
GGN	NM_152657	16871935	1.195	0.024	0.464	1.03	0.747	0.934	0.949	0.486	0.804	chr19	-	38874992	38878668	23	5.53163	5.59624	5.60636	5.37082	5.67444	5.35741	5.48208	5.63438	5.62208	5.7053	5.88174	5.95913
FAM185A	NM_001145268	17049882	1.195	0.024	0.464	1.081	0.196	0.668	1.196	0.022	0.299	chr7	+	102389399	102467706	24	7.74239	7.88852	8.06835	8.07801	8.83627	8.81786	8.94718	8.93031	8.45538	8.46318	8.7724	8.66037
FZD6	NM_003506	17071625	1.195	0.025	0.466	1.119	0.087	0.546	1.179	0.018	0.279	chr8	+	104310661	104345094	22	10.3588	10.3403	10.6131	10.5629	10.3252	10.2556	10.4713	10.4341	10.6615	10.5451	10.8828	10.837
GPR50	NM_004224	17107765	1.195	0.027	0.469	1.114	0.234	0.699	0.863	0.042	0.364	chrX	+	150345056	150349937	25	5.73779	5.63462	5.51928	5.4268	5.45421	5.65258	5.58412	5.83456	5.56605	5.68944	5.85565	5.91374
THSD7A	NM_015204	17055263	1.195	0.028	0.472	0.997	0.976	0.996	0.955	0.444	0.781	chr7	-	11410062	11871824	21	4.0461	3.91338	3.91798	3.90841	3.81313	4.13126	3.99298	3.94402	3.73831	3.83838	4.09355	3.99665
LOC100507521	ENST00000524942	16739226	1.195	0.029	0.477	1.123	0.257	0.713	0.91	0.111	0.497	chr11	-	61844749	61849656	15	4.61066	4.62908	4.46034	4.50693	4.71064	4.32557	4.64773	4.72421	4.57075	4.51096	4.72893	4.86694
EZH1	NM_001991	16845222	1.195	0.029	0.477	1.229	0.023	0.4	1.306	0.006	0.196	chr17	-	40852293	40897071	34	8.74499	8.80333	9.24783	9.07056	9.2067	9.34513	9.48548	9.66272	9.16268	9.27099	9.52361	9.42331
ZFHX4	NM_024721	17070177	1.195	0.03	0.477	1.001	0.992	0.998	1.086	0.373	0.739	chr8	+	77593454	77779521	37	6.04587	6.11053	6.02986	6.36486	4.34787	4.23273	4.47515	4.10819	4.14494	4.22	4.50542	4.37398
MCOLN3	NM_018298	16689020	1.195	0.034	0.488	1.059	0.424	0.811	1.106	0.109	0.494	chr1	-	85483765	85514223	32	7.65137	7.5924	7.81119	7.72552	7.46566	7.58438	7.52132	7.69466	8.49776	8.66643	8.86034	8.81869
HAVCR1	NM_012206	17002128	1.195	0.041	0.5	1.146	0.159	0.638	1.103	0.223	0.62	chr5	-	156456424	156486130	17	3.22929	3.46869	3.53336	3.44717	3.58303	3.44819	3.55621	3.86699	3.2693	3.4324	3.66819	3.54807
TMIGD1	NM_206832	16843115	1.195	0.051	0.519	1.01	0.89	0.972	0.956	0.522	0.822	chr17	-	28643366	28661065	27	3.58721	3.3705	3.39742	3.42946	3.34298	3.54456	3.46592	3.44913	3.22992	3.27856	3.62671	3.39632
	---	16887981	1.195	0.054	0.524	0.913	0.149	0.628	0.835	0.105	0.488	chr2	+	177042445	177043737	21	4.4267	4.23227	4.23807	3.89992	4.6252	4.54117	4.43978	4.4619	4.88133	5.04544	5.1296	5.31106
SLC34A3	NM_001177316	17091678	1.195	0.058	0.53	1.13	0.162	0.641	1.116	0.354	0.725	chr9	+	140125209	140131006	22	5.58533	5.11065	5.50961	5.5033	5.69663	5.64256	5.98614	5.7057	5.58904	5.46516	5.89642	5.67213
	---	17108773	1.195	0.062	0.535	1.117	0.212	0.683	1.379	0.025	0.308	chrX	-	2737206	2742169	11	5.18983	5.64928	5.89458	5.87328	5.53919	5.31862	5.4845	5.69283	5.39231	5.64755	5.81976	5.73483
	---	16888216	1.195	0.067	0.539	0.975	0.79	0.946	1.013	0.833	0.951	chr2	+	179641653	179644690	21	3.11902	3.02705	3.05077	3.13038	3.39996	3.0112	3.14801	3.18861	3.39708	3.18571	3.6403	3.45602
	---	17114878	1.195	0.075	0.548	0.853	0.154	0.631	1.087	0.314	0.697	chrX	-	148629755	148631380	14	3.69016	3.45289	3.61679	3.76747	3.9901	3.59972	3.48256	3.64699	3.40524	3.64836	3.8735	3.69469
	---	17063807	1.195	0.081	0.557	1.041	0.768	0.939	0.821	0.02	0.287	chr7	-	142197570	142198069	15	3.10795	3.00637	2.69732	2.84749	2.97021	2.61669	2.60421	3.09811	2.5368	2.77745	3.01484	2.81377
	---	16748617	1.195	0.088	0.569	0.927	0.207	0.679	1.079	0.347	0.72	chr12	+	14369524	14374231	10	3.64932	3.73701	3.67426	3.93172	3.84749	3.87419	3.7361	3.76707	4.19506	3.98798	4.47766	4.22004
	---	16836194	1.195	0.142	0.624	0.896	0.163	0.643	1.078	0.263	0.657	chr17	+	50995288	51004254	20	3.36038	3.39431	3.57273	3.40007	3.32533	3.55534	3.29712	3.26488	3.37821	3.23728	3.77087	3.35928
	---	16952458	1.195	0.217	0.688	0.936	0.312	0.75	1.008	0.917	0.976	chr3	-	40758901	40762498	18	4.57358	4.78726	4.77372	4.61032	4.78323	4.64591	4.6472	4.58958	4.67356	4.56317	4.59892	5.1528
	---	16989441	1.195	0.225	0.692	1.117	0.092	0.553	1.049	0.405	0.758	chr5	+	134456216	134475371	22	4.44472	4.49453	4.49467	4.58284	4.35875	4.44213	4.54899	4.57251	4.39298	4.95767	4.8729	4.992
S100A16	ENST00000368705	16693474	1.195	0.249	0.708	1.063	0.296	0.739	1.035	0.52	0.821	chr1	-	153579362	153585644	16	9.92616	9.90124	9.98613	9.94056	10.0439	10.0075	10.115	10.113	6.84846	6.90897	6.82807	7.4429
	---	16973203	1.195	0.265	0.721	1.12	0.093	0.556	0.87	0.242	0.639	chr4	+	189717668	189718050	18	4.425	3.97516	3.94748	4.05137	4.03504	3.96116	4.11948	4.20568	4.05852	4.24906	4.72087	4.10168
	---	16772523	1.195	0.391	0.794	0.955	0.57	0.876	0.903	0.329	0.707	chr12	-	131780655	131782517	8	4.04845	3.69326	3.81697	3.62975	3.92248	4.19917	3.94826	4.0387	4.31704	3.90116	4.75738	3.97396
KIT	NM_000222	16966855	1.194	0.021	0.458	1.017	0.761	0.937	0.888	0.07	0.43	chr4	+	55524085	55606881	19	3.88398	3.78217	3.65515	3.66887	3.79978	3.72351	3.77832	3.79563	3.6128	3.64123	3.842	3.92497
	---	16938897	1.194	0.025	0.464	1.056	0.466	0.831	1.005	0.94	0.983	chr3	+	36726531	36726860	14	3.48136	3.31199	3.36603	3.44132	3.22595	3.39291	3.46887	3.30664	3.21787	3.24499	3.42865	3.54639
KIF4A	NM_012310	17104484	1.194	0.024	0.464	0.922	0.193	0.667	1.046	0.428	0.772	chrX	+	69509879	69640774	9	9.8757	9.97173	9.98098	9.99687	9.75557	9.83136	9.65736	9.69533	9.83488	9.94512	10.1353	10.1571
	---	16818668	1.194	0.027	0.469	1.054	0.537	0.863	0.892	0.131	0.525	chr16	+	47999593	48005582	18	3.59224	3.76197	3.45043	3.57279	3.51175	3.53422	3.7519	3.44524	3.57646	3.45049	3.74608	3.79347
LOC100289187	NM_001195541	17049003	1.194	0.027	0.469	1.002	0.979	0.996	1.087	0.156	0.554	chr7	+	99195689	99208456	18	6.63359	6.64414	6.72724	6.78973	7.83283	7.56952	7.66515	7.74326	6.14306	6.00935	6.33605	6.32925
LOC100505835	NR_040036	16860376	1.194	0.028	0.472	1.011	0.846	0.96	1.053	0.354	0.724	chr19	+	29493462	29504862	22	3.93724	3.9133	4.035	3.96517	3.8363	3.91077	3.88403	3.89532	3.7006	3.72931	3.903	4.03981
LIPH	NM_139248	16962316	1.194	0.036	0.493	0.997	0.972	0.995	1.209	0.067	0.424	chr3	-	185224050	185270401	21	8.78112	9.10983	9.24815	9.19083	11.4057	11.5347	11.5562	11.3768	6.85582	6.68087	7.048	7.00152
MMRN1	ENST00000394980	16968878	1.194	0.04	0.498	1.082	0.333	0.764	1.103	0.138	0.533	chr4	+	90800683	90875780	24	4.17702	4.04386	4.23245	4.27054	4.06064	3.79727	4.0117	4.07346	4.08114	4.0931	4.24596	4.43956
	---	16899474	1.194	0.05	0.519	0.924	0.254	0.712	0.783	0.101	0.484	chr2	-	78176532	78178621	12	3.54481	4.10466	3.44428	3.5	3.68447	3.78816	3.69168	3.55236	3.49918	3.72139	3.89563	3.8362
	---	16747141	1.194	0.053	0.523	0.865	0.066	0.512	1.983	0.001	0.112	chr12	+	5385995	5492819	20	5.69053	6.20906	6.94631	6.92875	4.61535	4.73981	4.39333	4.54312	4.33585	4.2757	4.67815	4.44538
	---	16719204	1.194	0.055	0.527	1.062	0.336	0.766	1.073	0.33	0.707	chr10	-	125673090	125691113	19	4.75038	4.6898	4.92579	4.71763	4.72305	4.83804	4.86611	4.86858	4.60226	4.84658	4.99058	4.96984
SAT2	NM_133491	16840723	1.194	0.058	0.53	1.358	0.002	0.171	1.321	0.002	0.135	chr17	-	7529552	7531194	20	8.82329	8.89508	9.28568	9.23586	9.79532	9.907	10.3183	10.2663	9.71674	9.69397	9.83485	10.0875
GNG12-AS1	NR_040077	16665941	1.194	0.063	0.536	0.989	0.896	0.973	1.021	0.701	0.903	chr1	+	68297971	68668670	30	4.25435	4.16987	4.23298	4.25211	4.45514	4.19138	4.21356	4.40046	4.29297	4.02768	4.39133	4.44205
	---	16805933	1.194	0.067	0.539	0.969	0.714	0.924	0.879	0.151	0.548	chr15	-	22541418	22546063	26	4.79775	4.90384	4.80199	4.52844	4.88925	4.87398	4.99488	4.67778	4.29657	4.57049	4.66499	4.71331
	---	16898194	1.194	0.068	0.539	0.969	0.772	0.94	1.045	0.695	0.901	chr2	-	62296582	62374016	19	4.64887	4.21097	4.43414	4.55075	4.45699	4.12572	4.41228	4.07767	4.2125	4.36946	4.43031	4.66419
LOC100271832	BC035107	16878939	1.194	0.069	0.54	1.027	0.702	0.92	0.862	0.03	0.33	chr2	+	33152163	33171203	22	4.72149	4.8019	4.54955	4.54596	4.59978	4.79534	4.69941	4.77327	4.42354	4.59353	4.87684	4.6518
OR4C15	NM_001001920	16724728	1.194	0.071	0.543	1.099	0.23	0.695	0.997	0.964	0.991	chr11	+	55321783	55322895	12	4.26489	4.11242	4.25711	4.11129	4.01879	4.25844	4.27298	4.27654	4.15016	4.29062	4.603	4.35014
MIR3200	NR_036171	16929049	1.194	0.09	0.572	1.074	0.345	0.77	0.923	0.384	0.744	chr22	+	31127544	31127628	23	3.92362	3.61486	3.59079	3.71839	3.61762	3.71092	3.66081	3.87406	3.92648	3.85915	3.98591	4.31218
	---	17095683	1.194	0.143	0.625	1.023	0.739	0.932	1.076	0.441	0.779	chr9	-	93881420	93925540	24	4.62428	4.5656	4.87694	4.52397	4.73625	4.68328	4.64574	4.84023	4.42952	4.85039	4.94713	4.84492
	---	16897623	1.193	0.017	0.443	1.01	0.863	0.965	0.916	0.135	0.53	chr2	-	54743185	54767834	25	3.14127	3.1285	2.97962	3.03649	3.10455	3.06766	3.11805	3.08223	3.10682	3.10682	3.36645	3.3565
BCAS3	NM_001099432	16836697	1.193	0.017	0.444	0.978	0.721	0.926	1.154	0.074	0.44	chr17	+	58755172	59470199	26	9.11036	9.06802	9.19136	9.40056	10.0221	9.89741	9.93114	9.92537	8.57398	8.55483	8.82329	8.81526
P2RX5-TAX1BP3	NR_037928	16839769	1.193	0.018	0.449	0.98	0.741	0.932	1.008	0.866	0.962	chr17	-	3566187	3599698	34	9.44775	9.44916	9.46364	9.45827	9.38178	9.44018	9.33537	9.42926	9.55181	9.588	9.82061	9.82865
RALB	NM_002881	16885118	1.193	0.018	0.449	1.012	0.885	0.97	1.02	0.725	0.912	chr2	+	120997640	121052286	17	9.2608	9.2691	9.24941	9.33623	9.4149	9.71186	9.54802	9.61356	8.87654	8.8936	9.15381	9.12403
	---	17076188	1.193	0.019	0.453	1.085	0.529	0.86	0.927	0.451	0.785	chr8	-	33462453	33467086	17	3.94691	4.07037	3.71582	4.0834	4.11184	3.71661	3.82856	4.23671	4.1166	4.10927	4.33873	4.39665
PSG11	ENST00000320078	16872904	1.193	0.019	0.454	0.982	0.811	0.952	1.042	0.445	0.782	chr19	-	43511808	43530664	8	2.99085	2.95132	3.05492	3.00722	3.07251	3.15383	2.96757	3.20651	3.00252	2.9806	3.21867	3.27328
TM7SF2	ENST00000279263	16726680	1.193	0.027	0.469	1.067	0.344	0.77	1.42	0.001	0.083	chr11	+	64879317	64883856	27	6.92619	6.99667	7.44296	7.49241	8.05838	7.88841	8.05672	8.07583	7.00167	7.04083	7.33826	7.2142
ZNF385A	ENST00000394313	16765542	1.193	0.026	0.469	1.111	0.093	0.555	1.306	0.002	0.13	chr12	-	54762917	54785083	17	8.77334	8.76581	9.15017	9.15932	8.9636	8.96652	9.12011	9.1146	7.92277	7.85226	8.08899	8.19675
	---	16961101	1.193	0.027	0.47	0.955	0.47	0.833	0.995	0.936	0.982	chr3	-	164431883	164549268	19	3.29838	3.21892	3.28529	3.21899	3.29769	3.29466	3.15581	3.30233	3.14947	3.18192	3.48244	3.35634
C17orf103	ENST00000399011	16842477	1.193	0.027	0.471	1.032	0.619	0.894	0.914	0.122	0.513	chr17	-	21142183	21156722	23	6.52341	6.52295	6.40884	6.37859	6.65244	6.68831	6.78745	6.64462	6.73858	6.78832	6.95641	7.07809
	---	16788190	1.193	0.03	0.479	0.967	0.557	0.87	1.008	0.897	0.971	chr14	+	98561563	98576723	13	5.09117	4.98164	4.99798	5.09744	4.97235	4.90649	4.88672	4.89402	5.00419	4.86359	5.16389	5.21128
RBM18	NR_027125	17098103	1.193	0.031	0.481	1.111	0.131	0.607	1.128	0.07	0.429	chr9	-	125001834	125027143	27	9.23367	9.29295	9.38997	9.48419	8.72764	8.58426	8.8332	8.78348	9.42114	9.31785	9.56612	9.68356
GRID1-AS1	NR_038986	16706822	1.193	0.032	0.484	1.033	0.668	0.909	1.079	0.413	0.762	chr10	+	87337488	87366972	20	4.47548	4.13189	4.39096	4.43656	4.51831	4.4393	4.64586	4.40594	4.16993	4.32993	4.49262	4.518
	---	17044542	1.193	0.04	0.499	0.9	0.099	0.567	0.895	0.421	0.769	chr7	+	27255062	27261329	16	3.9026	4.16627	3.61759	4.1312	3.97627	3.9845	3.85647	3.80088	4.02729	4.04104	4.38512	4.19255
HOXA7	NM_006896	17056152	1.193	0.041	0.5	0.908	0.119	0.591	0.92	0.198	0.599	chr7	-	27193335	27197555	23	8.85483	8.75245	8.73514	8.63037	8.51436	8.47812	8.3499	8.36229	8.48313	8.53162	8.85696	8.66626
D4S234E	ENST00000421177	16964549	1.193	0.041	0.501	0.994	0.92	0.979	0.906	0.197	0.598	chr4	+	4349867	4420785	24	4.78295	4.65227	4.66774	4.48284	4.79417	4.8502	4.84167	4.786	4.63704	4.71491	4.83939	5.02314
GSC	ENST00000238558	16796313	1.193	0.046	0.511	1.161	0.04	0.455	1.05	0.398	0.753	chr14	-	95234553	95236562	18	5.56373	5.47064	5.5636	5.61188	5.4907	5.59451	5.73403	5.7806	5.46865	5.68336	5.81816	5.84443
CCL7	NM_006273	16833210	1.193	0.048	0.516	0.807	0.008	0.304	1.035	0.554	0.839	chr17	+	32597240	32599666	8	4.12532	4.06587	4.0938	4.19688	4.18198	4.14962	3.8999	3.8131	3.8609	3.66805	4.07177	3.96617
	---	16962481	1.193	0.048	0.517	0.906	0.25	0.709	0.857	0.056	0.399	chr3	-	186359299	186383496	20	3.92302	4.01679	3.83782	3.65802	3.92233	4.14958	3.98631	3.79925	3.90385	3.69036	4.07841	4.02323
	---	16921114	1.193	0.052	0.521	1.066	0.427	0.813	1.101	0.108	0.493	chr20	-	61416930	61423490	22	4.81106	4.79929	4.97557	4.91361	4.81201	5.01804	5.09428	4.91953	4.71389	4.77689	4.88711	5.11328
LHX3	NM_014564	17099836	1.193	0.057	0.529	1.079	0.225	0.693	0.856	0.047	0.377	chr9	-	139088096	139096955	13	7.34501	7.17069	7.05753	7.01096	7.08874	7.16117	7.26578	7.20321	7.14869	6.9221	7.23864	7.33982
SLC40A1	ENST00000261024	16906419	1.193	0.061	0.531	0.812	0.012	0.337	0.961	0.467	0.794	chr2	-	190425305	190448484	30	5.25889	5.29583	5.25402	5.18449	6.98605	6.88228	6.6768	6.59132	4.60551	4.82176	4.89777	5.03661
OR10R2	NM_001004472	16672353	1.193	0.061	0.532	1.081	0.278	0.728	1.023	0.677	0.894	chr1	+	158449668	158450675	17	3.46333	3.45589	3.53482	3.45027	3.3377	3.46212	3.5914	3.43469	3.63857	3.39213	3.81061	3.72878
	---	17004849	1.193	0.072	0.544	0.981	0.742	0.933	1.023	0.69	0.899	chr6	+	11417583	11481472	18	2.98221	2.9735	3.06394	2.95696	2.98865	2.89148	2.88731	2.936	3.07744	2.85502	3.13038	3.31015
	---	17090954	1.193	0.078	0.552	1.061	0.406	0.803	1.035	0.537	0.829	chr9	+	137519676	137521252	21	7.14923	7.06108	7.15058	7.15887	7.22607	7.07021	7.2996	7.16748	6.88135	7.10599	7.3493	7.14723
KLHL33	NM_001109997	16790026	1.193	0.08	0.554	1.003	0.959	0.991	0.964	0.497	0.81	chr14	-	20896970	20903801	21	5.89721	5.83334	5.82545	5.79817	5.82014	5.87362	5.81103	5.89147	5.81465	5.52513	5.97629	5.87402
	---	16796583	1.193	0.084	0.565	1.077	0.257	0.713	1.198	0.182	0.581	chr14	-	99391474	99394142	21	4.25145	4.46673	4.86258	4.37819	4.44322	4.43928	4.61528	4.4808	4.46642	4.26011	4.49782	4.73798
CTNNBIP1	NM_020248	16681501	1.193	0.084	0.565	1.007	0.908	0.976	1.098	0.151	0.548	chr1	-	9908334	9970394	21	7.23355	7.10596	7.32745	7.28186	7.66	7.64839	7.6972	7.63022	6.72852	6.94308	7.20528	6.9741
FAM153C	NR_038353	16993202	1.193	0.092	0.575	0.849	0.08	0.535	1.3	0.079	0.448	chr5	+	177433406	177482560	8	4.556	4.12857	4.54758	4.89346	4.54815	4.54193	4.45608	4.15919	4.43888	4.54403	4.90345	4.58762
BMP8A	NM_181809	16662890	1.193	0.094	0.576	1.107	0.323	0.757	0.977	0.839	0.953	chr1	+	39957318	39995541	11	7.7486	7.38278	7.68778	7.37626	7.71247	7.5376	7.59067	7.95293	7.29097	7.5734	7.78125	7.59375
	---	16943679	1.193	0.105	0.589	0.878	0.328	0.761	0.894	0.072	0.435	chr3	+	108293412	108293545	10	3.77015	3.81877	3.65188	3.61498	3.31779	3.86418	3.47779	3.32803	3.51924	3.64302	3.66723	4.00573
	---	17009323	1.193	0.103	0.589	1.064	0.333	0.764	0.953	0.567	0.845	chr6	+	46182812	46184920	20	5.271	4.97745	5.09833	5.01059	5.3396	5.23085	5.41737	5.33363	5.09154	5.35048	5.35274	5.60008
PDE2A	NM_001143839	16741725	1.193	0.111	0.595	1.153	0.08	0.536	1.207	0.034	0.338	chr11	-	72287184	72385635	34	5.39274	5.29294	5.51252	5.71652	4.88526	4.89816	5.20476	4.98797	4.61753	4.9432	5.12645	4.94527
	---	16658982	1.193	0.111	0.595	0.865	0.05	0.478	0.886	0.1	0.482	chr1	+	11418037	11424587	18	6.12436	5.96386	5.91434	5.82407	6.06526	6.19088	5.88161	5.95368	5.92849	5.9556	6.37982	6.01166
	---	16700397	1.193	0.12	0.605	0.992	0.916	0.978	0.896	0.099	0.481	chr1	-	230959387	230960453	13	3.6302	3.69196	3.56004	3.44489	3.48069	3.46296	3.57492	3.34657	3.49601	3.10649	3.56233	3.5509
FOXI1	NM_012188	16992197	1.193	0.128	0.611	0.981	0.732	0.929	1.01	0.867	0.962	chr5	+	169532901	169536729	21	4.78785	4.64305	4.73126	4.72874	4.82198	4.79151	4.79686	4.76092	4.71147	4.92371	5.24197	4.90088
	---	17088451	1.193	0.139	0.621	1.115	0.183	0.662	0.953	0.37	0.737	chr9	+	118501942	118506511	22	3.36793	3.37823	3.30882	3.29938	3.24242	3.38083	3.57542	3.36225	3.43381	3.37601	3.86737	3.45006
CST9L	NM_080610	16917928	1.193	0.156	0.637	1.008	0.894	0.972	0.988	0.903	0.973	chr20	-	23545369	23549386	19	4.7444	4.71488	4.5223	4.90318	4.809	4.72972	4.77257	4.78843	4.80232	4.51025	5.08548	4.73762
ZNF676	NM_001001411	16870854	1.193	0.184	0.66	0.95	0.497	0.845	1.091	0.257	0.652	chr19	-	22361903	22379753	12	3.16324	3.09766	3.14284	3.36709	3.14851	3.07559	2.92121	3.15411	3.25629	2.99162	3.16589	3.58933
MIR3926-2	NR_037495	17065905	1.193	0.196	0.668	1.048	0.463	0.83	0.728	0.02	0.287	chr8	+	12584746	12584808	9	3.66081	3.79266	3.07055	3.46701	3.22401	3.34742	3.38685	3.31972	3.49156	3.41451	3.44983	3.96596
	---	16803489	1.193	0.197	0.669	1.059	0.433	0.815	1.006	0.932	0.981	chr15	+	78585628	78588391	24	3.31201	3.4248	3.26068	3.49483	3.15582	3.08474	3.31021	3.09719	3.36377	3.21014	3.29168	3.79069
	---	16889836	1.193	0.225	0.692	1.106	0.235	0.7	1.022	0.703	0.904	chr2	+	204955180	204974572	19	3.47614	3.38962	3.49222	3.43544	3.36628	3.41503	3.39742	3.67335	3.40177	3.60021	4.02248	3.48827
	---	17089052	1.193	0.244	0.704	1.003	0.968	0.994	1.116	0.092	0.473	chr9	+	128003942	128019297	23	3.59327	3.56116	3.78991	3.68102	3.62887	3.59554	3.50301	3.72974	4.09389	4.0324	4.01817	4.61701
	---	16917650	1.193	0.261	0.717	0.945	0.622	0.895	1.091	0.273	0.664	chr20	-	19715460	19715553	8	3.23875	3.11931	3.41765	3.19163	3.54294	3.63824	3.74809	3.26991	3.35934	3.29964	3.89888	3.26927
ATP6V1G2-DDX39B	NR_037853	17017172	1.193	0.423	0.81	0.947	0.843	0.96	0.77	0.27	0.662	chr6	-	31497996	31516204	46	5.61756	6.50492	5.93341	5.43334	5.65395	6.75406	5.75659	6.49441	5.40739	5.67837	5.34153	6.25178
IER5	NM_016545	16674618	1.192	0.019	0.453	1.389	0.001	0.131	1.346	0.003	0.15	chr1	+	181057638	181060400	21	8.47096	8.36076	8.90122	8.78761	8.88965	8.85422	9.30176	9.39042	8.0286	7.99658	8.25122	8.27996
POU4F1-AS1	NR_047001	16775626	1.192	0.019	0.453	0.969	0.607	0.889	0.903	0.158	0.555	chr13	+	79152611	79193239	23	5.11204	4.9243	4.85852	4.88432	4.91343	5.02599	4.92631	4.92318	4.85112	4.81798	5.07015	5.10436
HIST1H3E	NM_003532	17005593	1.192	0.019	0.453	0.914	0.263	0.717	0.895	0.093	0.474	chr6	+	26225383	26225844	8	11.3316	11.3767	11.1393	11.2499	12.1114	11.9057	11.9531	11.8062	11.5912	11.6291	11.8481	11.8784
FBXO16	NM_172366	17075852	1.192	0.02	0.457	1.07	0.27	0.722	1.21	0.01	0.231	chr8	-	28285925	28347835	20	9.29225	9.28795	9.58561	9.54473	9.44552	9.39865	9.55729	9.48234	8.9635	9.02077	9.24332	9.24626
LOC100507299	NR_039990	17094755	1.192	0.025	0.464	0.916	0.199	0.672	1.179	0.083	0.455	chr9	-	72830975	72873790	15	5.5488	5.7709	5.79823	5.99671	5.96993	5.8176	5.77058	5.76442	5.29117	5.36912	5.54225	5.62489
AGAP11	NM_133447	16706912	1.192	0.025	0.465	1.393	0.001	0.126	1.022	0.821	0.947	chr10	+	88730498	88769960	15	4.33737	4.66794	4.44461	4.62326	5.96737	6.05604	6.50514	6.47471	4.31449	4.20027	4.51543	4.50527
ZNF385B	NM_152520	16906031	1.192	0.027	0.47	0.992	0.898	0.973	0.883	0.251	0.647	chr2	-	180306709	180726232	19	8.54697	8.94377	8.51556	8.617	4.07592	3.98105	3.97558	4.05871	3.91733	3.91308	4.23118	4.10475
GZMB	ENST00000216341	16791444	1.192	0.032	0.481	1.202	0.014	0.353	0.88	0.114	0.501	chr14	-	25100160	25103473	18	3.40968	3.39432	3.10134	3.33382	3.49357	3.45408	3.75798	3.71933	3.37977	3.50173	3.74009	3.64788
ECRP	NR_033909	16781606	1.192	0.036	0.492	1.087	0.399	0.8	0.961	0.582	0.851	chr14	+	21387500	21388458	11	4.79229	5.01761	4.87143	4.82372	4.77392	4.56267	4.94788	4.62836	5.4145	5.26633	5.6388	5.54901
	---	17072641	1.192	0.08	0.555	1.014	0.822	0.954	1.094	0.243	0.639	chr8	+	127570120	127725660	15	3.62176	3.75036	3.71679	3.91435	3.58985	3.72318	3.67497	3.67814	3.58278	3.51152	3.65257	3.94854
FPGT-TNNI3K	NM_001112808	16666143	1.192	0.081	0.557	1.029	0.626	0.895	1.095	0.142	0.538	chr1	+	74663896	75010116	50	5.52922	5.55195	5.72172	5.62149	5.74743	5.67563	5.75977	5.7447	5.53118	5.66701	5.71553	5.98948
	---	16945230	1.192	0.096	0.578	0.851	0.056	0.492	1.07	0.336	0.712	chr3	+	128191835	128193950	21	3.74886	3.83773	3.79962	3.98186	3.89835	4.054	3.66484	3.8241	3.83263	3.64697	3.85177	4.13448
	---	16701884	1.192	0.129	0.612	1.057	0.465	0.831	1.019	0.786	0.935	chr10	+	3247908	3248816	20	3.74957	3.82437	3.71791	3.90905	4.00596	3.79582	4.04199	3.91997	3.70028	4.08403	4.20432	4.08548
PDGFD	NM_025208	16743816	1.192	0.149	0.632	1.24	0.008	0.306	0.879	0.047	0.376	chr11	-	103777914	104035107	23	4.83625	4.88296	4.64877	4.69809	4.62277	4.72157	4.99913	4.96562	4.39691	4.82397	4.91226	4.81489
	---	17082247	1.192	0.196	0.668	1.223	0.024	0.408	0.855	0.096	0.478	chr8	-	144800416	144801061	20	6.33484	6.14715	6.13238	5.89717	6.68619	6.89449	7.10824	7.05147	6.17396	5.65998	6.20185	6.13848
WNT1	NM_005430	16750690	1.192	0.218	0.689	1.131	0.07	0.519	0.929	0.285	0.675	chr12	+	49372236	49376396	22	6.54554	6.40485	6.30813	6.43064	6.29973	6.3959	6.53248	6.51849	6.14794	6.65042	6.53568	6.7682
PAGE2	ENST00000374968	17104098	1.192	0.336	0.76	1.075	0.442	0.819	0.807	0.131	0.525	chrX	+	55115441	55119275	10	5.56332	5.93015	5.23557	5.63838	6.02936	5.6933	5.90096	6.03089	5.18828	5.43382	5.92603	5.20299
AMOTL1	NM_130847	16730268	1.191	0.019	0.453	1.107	0.134	0.61	0.877	0.123	0.513	chr11	+	94439597	94609918	25	7.30292	7.32115	6.99299	7.25251	6.03919	6.12035	6.17433	6.27878	6.03975	6.07022	6.29553	6.31802
IRX4	ENST00000505790	16994054	1.191	0.019	0.456	0.929	0.411	0.805	0.718	0.005	0.188	chr5	-	1877541	1887350	20	7.65831	7.56378	7.26303	7.00232	6.08931	6.32903	6.21685	5.98891	6.16428	6.13452	6.41936	6.38287
ZMYND15	NM_001136046	16829858	1.191	0.02	0.457	0.918	0.165	0.644	0.897	0.137	0.533	chr17	+	4643319	4649411	27	6.33725	6.16911	6.04832	6.1437	7.14572	7.13415	7.04951	6.98164	6.15921	6.13849	6.43076	6.37081
HIPK3	ENST00000303296	16723400	1.191	0.021	0.46	0.997	0.958	0.991	1.171	0.019	0.286	chr11	+	33278218	33378569	35	9.26193	9.25808	9.48338	9.49338	10.2368	10.1504	10.1858	10.1927	9.53294	9.49635	9.734	9.7984
CSF2RA	NM_001161529	17101081	1.191	0.024	0.464	0.78	0.115	0.588	1.027	0.813	0.946	chrX	+	1387693	1429274	27	5.79179	5.52787	5.89963	5.49867	5.60203	5.93263	5.13737	5.6821	5.69844	5.75213	5.93464	6.0195
RTP2	NM_001004312	16962579	1.191	0.027	0.469	1.16	0.105	0.576	0.96	0.535	0.828	chr3	-	187416047	187420345	21	4.78347	4.72488	4.60695	4.78318	4.66296	4.67605	5.03141	4.73645	4.56725	4.65191	4.81838	4.90506
	---	17073011	1.191	0.026	0.469	0.938	0.306	0.746	0.911	0.148	0.544	chr8	+	137543022	137997178	24	3.4275	3.48127	3.3773	3.26435	3.55153	3.62828	3.53774	3.45719	3.27433	3.23272	3.44968	3.56221
	---	16995978	1.191	0.028	0.474	0.916	0.611	0.891	0.974	0.78	0.933	chr5	-	43575425	43603770	16	4.815	4.65699	4.86417	4.53182	7.32479	7.75551	7.08486	7.74394	4.81378	4.69055	5.0274	4.98107
DGKA	ENST00000331886	16752244	1.191	0.029	0.477	1.636	0	0.041	2.192	0	0.008	chr12	+	56321103	56347811	44	7.1432	7.23032	8.3267	8.31051	8.51249	8.50048	9.14676	9.28703	7.70012	7.63907	7.8592	7.98496
FOXN1	ENST00000226247	16832499	1.191	0.03	0.477	1.067	0.552	0.868	0.995	0.932	0.981	chr17	+	26850959	26865914	25	4.968	5.03351	4.92994	5.05682	5.92957	5.48792	5.75454	5.84993	5.02099	4.87934	5.19489	5.21006
CASP16	AF098666	16815394	1.191	0.031	0.48	1.047	0.497	0.846	1.055	0.341	0.716	chr16	+	3194244	3199964	25	6.32851	6.25214	6.37131	6.36388	6.30712	6.26479	6.43931	6.26501	5.99996	5.89691	6.25155	6.14873
COL2A1	NM_001844	16763783	1.191	0.038	0.497	1.112	0.218	0.687	1.006	0.921	0.977	chr12	-	48366748	48398285	28	5.78029	5.92039	5.92588	5.79355	5.83749	6.04323	6.19519	5.99208	5.918	5.87024	6.23316	6.0587
FOXJ1	NM_001454	16849142	1.191	0.039	0.498	1.03	0.613	0.891	0.957	0.629	0.873	chr17	-	74132414	74137380	16	5.39487	5.49469	5.21536	5.547	5.37204	5.44573	5.45438	5.44803	5.46411	5.63692	5.77122	5.83421
SLC25A41	NM_173637	16867705	1.191	0.04	0.5	1.055	0.513	0.852	0.921	0.486	0.804	chr19	-	6426048	6433790	19	4.99908	4.80553	4.5648	5.00362	4.67144	4.50754	4.5499	4.7832	4.73524	4.7529	5.09021	4.90211
AOAH-IT1	NR_046764	17056734	1.191	0.041	0.5	0.909	0.156	0.636	0.997	0.962	0.99	chr7	-	36637440	36639726	22	3.36991	3.31616	3.41427	3.26332	3.56983	3.61048	3.38931	3.5159	3.21452	3.20333	3.55773	3.36495
	---	16883809	1.191	0.067	0.539	0.999	0.993	0.998	0.822	0.013	0.255	chr2	+	103603781	103605023	22	4.6667	4.60833	4.29949	4.40961	4.59783	4.43101	4.72262	4.30347	4.49718	4.55372	4.9098	4.64489
	---	16781108	1.191	0.069	0.541	1.15	0.16	0.639	1.051	0.666	0.889	chr13	-	112834895	112835527	17	4.09738	3.77134	3.83297	4.17891	3.98761	3.67123	3.94891	4.11322	3.83846	3.78339	3.92795	4.19833
CD6	NM_006725	16725432	1.191	0.076	0.549	1.01	0.865	0.965	0.981	0.783	0.934	chr11	+	60739113	60787849	19	4.51808	4.6723	4.64583	4.48898	4.46778	4.52714	4.57004	4.4549	4.47352	4.58419	4.91737	4.645
BOLL	ENST00000321801	16907006	1.191	0.076	0.549	0.906	0.177	0.656	0.988	0.83	0.951	chr2	-	198591603	198651486	26	4.26709	4.16198	4.18903	4.20517	4.39196	4.20369	4.16034	4.15119	4.02665	4.23068	4.48572	4.27563
	---	16685503	1.191	0.118	0.603	1.339	0.095	0.558	0.863	0.452	0.786	chr1	-	38292232	38293886	6	3.14041	3.83361	3.52681	3.0219	2.90751	3.61197	3.64067	3.72168	3.49552	3.36048	3.50313	3.85594
	---	16979792	1.191	0.125	0.609	1.003	0.96	0.991	0.992	0.88	0.966	chr4	-	133757927	133902832	16	3.55589	3.50738	3.49835	3.54178	3.41677	3.46221	3.35274	3.53597	3.49486	3.43352	3.52303	3.90835
PRRX2	NM_016307	17090103	1.191	0.128	0.611	1.081	0.434	0.816	0.754	0.009	0.223	chr9	+	132427920	132484953	16	8.15859	7.97308	7.74817	7.57031	6.16888	6.51004	6.552	6.35303	6.13314	6.4428	6.41593	6.66344
CNIH2	NM_182553	16727363	1.191	0.133	0.615	0.867	0.123	0.597	0.887	0.18	0.579	chr11	+	66045661	66052772	17	6.57681	6.73804	6.61093	6.35693	6.7803	7.08633	6.70844	6.74567	5.97486	6.16673	6.50101	6.14419
	---	17076624	1.191	0.139	0.621	0.979	0.754	0.936	1.096	0.208	0.608	chr8	-	41397900	41402563	13	3.56708	3.44339	3.55612	3.71835	3.52258	3.33841	3.39736	3.40279	3.60721	3.74533	4.12519	3.73124
LOC100287477	XM_002343656	16874486	1.191	0.266	0.721	0.899	0.099	0.567	0.932	0.243	0.639	chr19	-	50561973	50577699	26	5.06375	5.00369	4.97652	4.88924	5.04828	5.12204	4.93337	4.92885	4.628	5.05921	5.3271	4.86431
TBC1D7	AK296391	17015731	1.191	0.303	0.744	1.191	0.021	0.392	1.037	0.687	0.898	chr6	-	13273623	13295818	16	4.3077	4.32555	4.1993	4.5382	4.4892	4.55043	4.72765	4.81658	4.26967	3.66505	4.04431	4.39412
[truncated: 35,281 more rows]
