# Supplementary material for: Prosurvival long noncoding RNA PINCR regulates a subset of p53 targets in human colorectal cancer cells by binding to Matrin 3
Source: eLife journal article supplement (doi:10.7554/elife.23244), 2017-06-05
Supplement: supp [file elife-23244-supp-v1.zip › elife_poa_e23244_Supplementary_File_2.xls]

## Sheet: Supplementary File 2
Supplementary File 2. LncRNAs induced after Nutlin treatment in HCT116, RKO and SW48 cells.
Symbol	Accession	probeset_id	RKOp53wt.Ctl_vs_Nutlin3a:FoldChange	RKOp53wt.Ctl_vs_Nutlin3a:P.Value	RKOp53wt.Ctl_vs_Nutlin3a:adj.P.Val	SW48p53wt.Ctl_vs_Nutlin3a:FoldChange	SW48p53wt.Ctl_vs_Nutlin3a:P.Value	SW48p53wt.Ctl_vs_Nutlin3a:adj.P.Val	HCT116p53wt.Ctl_vs_Nutlin-3a:FoldChange	HCT116p53wt.Ctl_vs_Nutlin-3a:P.Value	HCT116p53wt.Ctl_vs_Nutlin-3a:adj.P.Val	chr	strand	start	stop	total_probes	HCT116p53wt_Ctl_1	HCT116p53wt_Ctl_2	HCT116p53wt_Nutlin_3a_1	HCT116p53wt_Nutlin_3a_2	SW48p53wt_Ctl_1	SW48p53wt_Ctl_2	SW48p53wt_Nutlin_3a_1	SW48p53wt_Nutlin_3a_2	RKOp53wt_Ctl_1	RKOp53wt_Ctl_2	RKOp53wt_Nutlin_3a_1	RKOp53wt_Nutlin_3a_2
LOC643401	NR_038848	16983611	3.458	0	0.018	2.519	0	0.029	2.898	0	0.01	chr5	+	27472391	27496508	23	5.63364	5.62361	7.30648	7.01994	5.05201	4.95126	6.11555	6.55392	7.05714	7.0064	8.90444	8.73952
RP3-326I13.1 (PINCR)	---	17102819	2.563	0	0.039	1.866	0	0.014	5.748	0	0.003	chrX	+	43036243	43085847	17	3.68802	3.47523	5.99402	6.21567	3.6731	3.65802	4.60375	4.52758	3.80649	3.68686	4.96234	5.24654
RP11-347C18.3	---	17071079	2.523	0	0.023	2.313	0	0.026	2.474	0	0.007	chr8	+	95962265	95963624	20	6.83669	6.85466	8.23501	8.07032	6.96122	6.97466	7.99152	8.36514	8.06171	8.15144	9.40397	9.47872
RP11-134G8.8	---	16697927	2.986	0	0.018	3.565	0	0.002	3.371	0	0.006	chr1	-	201433511	201434274	16	5.73055	5.81126	7.40632	7.64061	6.79622	6.78001	8.60112	8.64278	6.77537	6.6948	8.26809	8.35714
