# Supplementary material for: Prosurvival long noncoding RNA PINCR regulates a subset of p53 targets in human colorectal cancer cells by binding to Matrin 3
Source: eLife journal article supplement (doi:10.7554/elife.23244), 2017-06-05
Supplement: supp [file elife-23244-supp-v1.zip › elife_poa_e23244_Supplementary_File_3.xls]

## Sheet: Supplementary File 3
Supplementary File 3. Microarray analysis from PINCR-WT and PINCR-KO cells untreated or treated with 5-FU (100 uM). "KO" refers to PINCR-KO and WT refers to PINCR-WT. "FC" refers to fold change. The 11 genes regulated by PINCR and also p53 are shown in red.
SYMBOL	ACCESSION	ProbeID	PROBE_ID	Chr	logFC	FC(KO_CTL/WT_CTL)	P.Value	adj.P.Val	logFC	FC(KO_5-FU/WT_CTL)	P.Value	adj.P.Val	logFC	FC(WT_5-FU/WT_CTL)	P.Value	adj.P.Val	logFC	FC(KO_5-FU/KO_CTL)	P.Value	adj.P.Val
42064	NM_017923.2	4610113	ILMN_2094942	4	-0.004	0.997231	0.935547	0.989562	0.016	1.01115	0.753576	0.929556	0.001	1.00069	0.975917	0.995124	0.02	1.01396	0.719122	0.945933
42064	NM_017923.2	2000386	ILMN_1681101	4	0.076	1.05409	0.201492	0.689685	-0.045	0.96929	0.43113	0.769749	0.05	1.03526	0.381481	0.78937	-0.122	0.918913	0.028529	0.243445
42065	NM_001005416.1	6770360	ILMN_1669592	19	-0.112	0.925304	0.081853	0.506879	0.083	1.05922	0.163495	0.490154	0.487	1.40153	0.000843	0.017282	0.194	1.14393	0.001444	0.035075
42065	NM_016496.4	4180736	ILMN_2271336	19	-0.159	0.895646	0.021373	0.278987	-0.187	0.87843	0.003106	0.024997	0.072	1.05117	0.456435	0.832326	-0.028	0.980779	0.609519	0.915049
42065	NM_001005415.1	5670735	ILMN_2337789	19	-0.087	0.941478	0.106451	0.557729	-0.007	0.99516	0.884281	0.969428	0.288	1.22095	0.001405	0.024888	0.08	1.05702	0.172881	0.623326
42065	NM_001005416.1	1470196	ILMN_1703142	19	-0.038	0.974004	0.700039	0.940126	0.269	1.20497	0.000603	0.006609	0.525	1.43893	0.000576	0.013187	0.306	1.23628	0.016565	0.172761
42066	NM_178450.2	3290332	ILMN_1735038	5	-0.096	0.935623	0.116991	0.576438	-0.009	0.993781	0.865961	0.964642	-0.056	0.961927	0.27702	0.708831	0.087	1.06216	0.13308	0.558729
42066	XM_001127871.1	6760167	ILMN_1655796		0.15	1.10957	0.038991	0.371141	0.176	1.12975	0.008988	0.059148	0.121	1.08749	0.20021	0.623414	0.026	1.01819	0.703113	0.942758
42066	XM_001127871.1	4670255	ILMN_1699644		0.05	1.03526	0.305891	0.774391	0.169	1.12428	0.012593	0.077321	0.222	1.16635	0.002442	0.036579	0.119	1.08598	0.059498	0.374845
42067	NM_020814.1	3940044	ILMN_1789991	2	-0.015	0.989657	0.708909	0.941671	-0.018	0.987601	0.692349	0.906618	-0.041	0.971981	0.419791	0.811961	-0.002	0.998615	0.951421	0.992105
42068	NM_017824.4	1300059	ILMN_2047430	10	0.101	1.07252	0.091827	0.5282	0.128	1.09278	0.040067	0.193219	-0.131	0.913198	0.060615	0.341088	0.027	1.01889	0.609642	0.91513
42068	NM_017824.4	6450324	ILMN_1702764	10	0.109	1.07848	0.157707	0.6361	0.178	1.13131	0.003735	0.028818	-0.01	0.993092	0.864608	0.971921	0.069	1.04899	0.316656	0.769011
42069	NM_005885.2	780544	ILMN_1757106	5	0.003	1.00208	0.967752	0.994331	0.173	1.1274	0.023063	0.125743	-0.011	0.992404	0.851912	0.968967	0.17	1.12506	0.037011	0.285586
42070	NM_022826.2	7560594	ILMN_1717337	2	0.03	1.02101	0.83063	0.969232	-0.354	0.782412	0.031626	0.161312	-0.141	0.90689	0.279217	0.711404	-0.384	0.76631	0.012585	0.145928
42071	NM_001002266.1	430711	ILMN_1677318	10	0.029	1.0203	0.611011	0.917729	0.012	1.00835	0.82085	0.950958	-0.015	0.989657	0.729988	0.937344	-0.017	0.988286	0.795456	0.963243
42071	NM_145021.4	3170482	ILMN_2336335	10	-0.023	0.984184	0.690016	0.9381	-0.012	0.991717	0.817642	0.949905	0.033	1.02314	0.525017	0.867141	0.011	1.00765	0.849043	0.974133
42071	NM_001002265.1	620129	ILMN_2257749	10	0.081	1.05775	0.13486	0.604965	-0.04	0.972655	0.417614	0.761917	0.047	1.03311	0.521672	0.865119	-0.122	0.918913	0.023585	0.215254
42071	NM_001002266.1	5360435	ILMN_1812607	10	-0.006	0.99585	0.914426	0.984932	0.015	1.01045	0.785215	0.940038	0.063	1.04464	0.259977	0.692663	0.022	1.01537	0.69658	0.941063
42071	NM_001002265.1	2600634	ILMN_2341626	10	-0.024	0.983502	0.607609	0.916722	-0.003	0.997923	0.956613	0.989409	0.064	1.04536	0.381105	0.789135	0.022	1.01537	0.632368	0.923084
42072	NM_138396.4	4890131	ILMN_1748393	12	-0.143	0.905634	0.061753	0.45307	-0.099	0.93368	0.122778	0.415138	-0.122	0.918913	0.082786	0.409457	0.044	1.03097	0.362777	0.800836
42073	NM_001100875.1	1990356	ILMN_3305472	17	-0.029	0.980099	0.56024	0.901139	-0.024	0.983502	0.624038	0.877091	-0.043	0.970634	0.378064	0.788308	0.005	1.00347	0.926247	0.988592
42073	NM_001100875.1	6420131	ILMN_3228863	17	-0.092	0.938221	0.164444	0.645283	-0.108	0.927873	0.064018	0.271278	-0.026	0.98214	0.66053	0.915724	-0.016	0.988971	0.770559	0.957712
42074	NM_001102562.1	60731	ILMN_3234892	5	-0.015	0.989657	0.745545	0.949707	-0.016	0.988971	0.740995	0.925378	0.017	1.01185	0.717961	0.934628	-0.002	0.998615	0.973742	0.995772
42248	NM_052838.2	4480279	ILMN_2415162	16	-0.085	0.942785	0.143405	0.618192	-0.151	0.900626	0.02225	0.122365	-0.072	0.951318	0.231714	0.662685	-0.066	0.955283	0.167795	0.617694
42248	XM_944593.1	290022	ILMN_1671854		-0.016	0.988971	0.810884	0.964288	0.079	1.05629	0.202859	0.55031	0.09	1.06437	0.20645	0.630764	0.095	1.06807	0.113521	0.519083
42249	NM_004404.3	630601	ILMN_2365711	2	0.232	1.17446	0.269659	0.748295	-0.458	0.727995	0.000194	0.002652	-0.243	0.844986	0.117399	0.493398	-0.689	0.620284	0.009285	0.118681
42249	NM_001008492.1	3940139	ILMN_1747665	2	-0.007	0.99516	0.897476	0.981226	-0.07	0.952638	0.250419	0.610849	0.025	1.01748	0.636689	0.90831	-0.063	0.957271	0.250074	0.713622
42249	NM_001008491.1	6940619	ILMN_1676737	2	0.021	1.01466	0.786341	0.957806	-0.098	0.934327	0.107557	0.383387	0.221	1.16554	0.110953	0.479621	-0.119	0.920826	0.153868	0.595582
42249	NM_001008491.1	5960703	ILMN_1748546	2	-0.244	0.844401	0.062131	0.453878	-0.709	0.611744	3e-06	0.000128	-0.47	0.721965	0.000824	0.017037	-0.465	0.724471	0.001067	0.029094
42250	NM_019106.4	4890021	ILMN_1746673	22	0.994	1.9917	3e-06	0.002279	0.666	1.58667	1e-06	4.3e-05	-0.06	0.959264	0.272324	0.704919	-0.328	0.79664	0.00516	0.08053
42250	NM_019106.4	6040066	ILMN_1659953	22	0.577	1.49174	1.1e-05	0.004317	0.509	1.42306	7.5e-05	0.001274	-0.057	0.961261	0.471322	0.840624	-0.067	0.954621	0.42203	0.835127
42251	NM_004574.2	6180215	ILMN_2294123	17	-0.069	0.953299	0.189193	0.676842	-0.071	0.951978	0.212658	0.564174	-0.082	0.944747	0.140201	0.535659	-0.003	0.997923	0.957243	0.99312
42251	NM_080417.1	6110075	ILMN_1778079	17	0.016	1.01115	0.825771	0.968192	0.01	1.00696	0.855626	0.962367	-0.007	0.99516	0.891319	0.977634	-0.006	0.99585	0.932783	0.989665
42251	NM_080415.1	3420639	ILMN_2251114	17	0.074	1.05263	0.202364	0.690566	0.028	1.0196	0.573983	0.854099	0.018	1.01255	0.705799	0.931651	-0.046	0.968618	0.393505	0.818395
42251	NM_080416.1	5900543	ILMN_2402172	17	0.029	1.0203	0.627991	0.922147	0.07	1.04972	0.344924	0.703985	0.19	1.14076	0.031599	0.227567	0.041	1.02883	0.580743	0.905402
42251	NM_080415.1	4670458	ILMN_1776157	17	0.246	1.18591	0.074706	0.49046	0.367	1.28967	0.000133	0.001971	0.646	1.56482	5e-06	0.000552	0.122	1.08824	0.345137	0.789672
42252	NM_002688.4	5910446	ILMN_1688067	22	0	1	0.993192	0.998806	0.019	1.01326	0.679646	0.901365	0.026	1.01819	0.588273	0.892002	0.019	1.01326	0.662689	0.931697
42252	NM_001009939.1	5890537	ILMN_1674893	22	0.115	1.08298	0.069045	0.474402	-0.001	0.999307	0.975627	0.993745	0.055	1.03886	0.244974	0.67535	-0.116	0.922742	0.075268	0.425422
42252	NM_002688.4	6960022	ILMN_1789627	22	0.296	1.22774	0.06203	0.453764	0.223	1.16716	0.045705	0.213066	0.192	1.14235	0.0773	0.39364	-0.073	0.950659	0.494509	0.869027
42253	NM_145799.2	6270020	ILMN_1661342	X	-0.061	0.958599	0.419436	0.841804	-0.058	0.960595	0.328896	0.690797	-0.025	0.982821	0.763816	0.946232	0.003	1.00208	0.95467	0.992865
42253	NM_145800.2	7610370	ILMN_2399264	X	0.052	1.0367	0.450506	0.859528	-0.012	0.991717	0.83089	0.955043	-0.022	0.984866	0.644009	0.910925	-0.064	0.956608	0.417427	0.831725
42253	NM_145800.2	610278	ILMN_1681798	X	0.046	1.0324	0.478632	0.870713	0.036	1.02527	0.555367	0.844828	0.036	1.02527	0.676797	0.92136	-0.01	0.993092	0.810429	0.966587
42254	NM_001788.4	450195	ILMN_1729019	7	-0.151	0.900626	0.261368	0.74156	-0.021	0.985549	0.814494	0.949347	-0.08	0.946058	0.41668	0.810692	0.13	1.09429	0.216673	0.676945
42255	NM_001098813.1	1500451	ILMN_1721910	5	-0.094	0.936921	0.038825	0.3706	-0.038	0.974004	0.43442	0.772124	-0.014	0.990343	0.771686	0.94833	0.055	1.03886	0.255745	0.718054
42256	NM_006640.3	4590110	ILMN_1769118	17	0.233	1.17528	0.143688	0.618538	0.058	1.04102	0.666399	0.895151	-0.008	0.99447	0.941	0.988653	-0.175	0.885768	0.337727	0.784576
42257	NM_178584.1	7400327	ILMN_1691864	2	-0.037	0.97468	0.587888	0.910967	-0.262	0.833931	0.000222	0.002955	-0.187	0.87843	0.015232	0.137095	-0.226	0.855002	0.011371	0.136077
42257	NM_144710.2	3710386	ILMN_2343757	2	-0.105	0.929805	0.427869	0.846914	-0.467	0.723467	0.001156	0.011223	-0.181	0.882091	0.144586	0.542776	-0.362	0.778085	0.00071	0.022737
42257	NM_144710.2	6940184	ILMN_2258958	2	0.063	1.04464	0.228029	0.71531	0.026	1.01819	0.575682	0.854853	0.003	1.00208	0.955623	0.99155	-0.037	0.97468	0.467297	0.855598
42258	NM_018243.2	20288	ILMN_1788778	4	-0.333	0.793884	0.032799	0.342503	-0.269	0.829895	0.009262	0.060601	-0.139	0.908148	0.165291	0.576327	0.064	1.04536	0.551553	0.893562
42259	NM_144605.2	1260102	ILMN_1788061	16	-0.106	0.929161	0.045034	0.395975	-0.007	0.99516	0.892161	0.971616	-0.028	0.980779	0.589688	0.892002	0.099	1.07103	0.081506	0.442646
42260	NR_024271.1	2350110	ILMN_3239164	7	0.057	1.0403	0.215484	0.703755	0.04	1.02811	0.382859	0.735706	0.009	1.00626	0.852011	0.968973	-0.017	0.988286	0.67842	0.935977
42261	NM_207366.2	7200010	ILMN_1798053	7	-0.016	0.988971	0.808042	0.963415	-0.017	0.988286	0.716238	0.915712	-0.032	0.978063	0.499831	0.854087	-0.001	0.999307	0.98736	0.998196
42262	NM_004261.3	6100288	ILMN_2407082	1	-0.406	0.754713	0.045862	0.398962	-0.237	0.848508	0.024309	0.13116	-0.053	0.96393	0.525987	0.867533	0.169	1.12428	0.318618	0.770651
42339	NM_017418.1	3830482	ILMN_1659893	9	0.031	1.02172	0.485568	0.873741	0.035	1.02456	0.523224	0.82796	0.037	1.02598	0.476821	0.843616	0.004	1.00278	0.942489	0.990427
7A5	NM_182762.2	6450255	ILMN_1762337	7	0.004	1.00278	0.93901	0.989937	0.068	1.04826	0.239684	0.598108	0.111	1.07998	0.105432	0.466901	0.064	1.04536	0.307719	0.76194
A1BG	NM_130786.2	2570615	ILMN_2055271	19	0.009	1.00626	0.909843	0.983989	-0.015	0.989657	0.848212	0.959627	-0.042	0.971307	0.561503	0.883006	-0.023	0.984184	0.686043	0.938394
A1BG	NM_130786.2	6370619	ILMN_1736007	19	-0.025	0.982821	0.65581	0.929454	0.002	1.00139	0.963817	0.990867	0.048	1.03383	0.402566	0.802824	0.028	1.0196	0.578715	0.905002
A1CF	NM_138932.1	2600039	ILMN_2383229	10	-0.023	0.984184	0.664042	0.931007	0.01	1.00696	0.836207	0.956572	-0.056	0.961927	0.281326	0.713121	0.033	1.02314	0.519378	0.880356
A1CF	NM_138933.1	5340672	ILMN_1779670	10	0.02	1.01396	0.657196	0.929736	0.072	1.05117	0.178038	0.513324	-0.044	0.969962	0.331074	0.754415	0.051	1.03598	0.365083	0.802354
A1CF	NM_014576.2	2650615	ILMN_1806310	10	0.009	1.00626	0.876982	0.977759	0.109	1.07848	0.05977	0.258891	0.034	1.02385	0.548511	0.876683	0.1	1.07177	0.109323	0.510217
A26C3	NM_001004053.2	3870044	ILMN_1717783	22	0.01	1.00696	0.889433	0.979759	0.011	1.00765	0.854334	0.961694	-0.006	0.99585	0.914803	0.982775	0.001	1.00069	0.992143	0.998848
A26C3	NM_001004053.2	2000519	ILMN_1653355	22	0.008	1.00556	0.865987	0.975964	-0.063	0.957271	0.295659	0.657963	0.02	1.01396	0.693217	0.928023	-0.072	0.951318	0.197518	0.654992
A26C3	NM_001004053.2	7050209	ILMN_1705025	22	-0.002	0.998615	0.959283	0.993013	0.067	1.04754	0.367572	0.723635	0.044	1.03097	0.453376	0.830862	0.069	1.04899	0.349371	0.792573
A2BP1	NM_145891.1	5220554	ILMN_2359168	16	-0.08	0.946058	0.104721	0.55564	-0.017	0.988286	0.722434	0.91848	-0.072	0.951318	0.182495	0.601804	0.064	1.04536	0.210585	0.669929
A2BP1	NM_018723.2	6420681	ILMN_1787689	16	0.137	1.09962	0.035244	0.353023	0.094	1.06733	0.06634	0.277957	-0.007	0.99516	0.869416	0.972855	-0.042	0.971307	0.480394	0.861044
A2BP1	NM_145893.1	5390438	ILMN_1731507	16	0.025	1.01748	0.692812	0.938939	-0.015	0.989657	0.760987	0.931938	0.034	1.02385	0.536963	0.872104	-0.041	0.971981	0.507449	0.875073
A2BP1	NM_145891.1	1580181	ILMN_1814316	16	-0.03	0.97942	0.585342	0.909942	-0.058	0.960595	0.24359	0.603008	0.057	1.0403	0.267496	0.700355	-0.028	0.980779	0.61913	0.918941
A2LD1	NM_033110.1	4760377	ILMN_3241953	13	0.088	1.0629	0.129452	0.596484	-0.127	0.915734	0.042832	0.202994	-0.213	0.862741	0.003122	0.043729	-0.215	0.861546	0.001282	0.032657
A2M	NM_000014.4	2370438	ILMN_1745607	12	-0.025	0.982821	0.548869	0.896313	-0.076	0.948684	0.12409	0.417729	0.063	1.04464	0.2889	0.720142	-0.051	0.965267	0.2744	0.735236
A2ML1	NM_144670.2	4050154	ILMN_2136495	12	-0.027	0.981459	0.517797	0.885897	0.043	1.03025	0.438196	0.77496	0.028	1.0196	0.541589	0.873559	0.071	1.05044	0.228188	0.687586
A3GALT2	NM_001080438.1	4830092	ILMN_2295559	1	0.008	1.00556	0.898466	0.981292	0.019	1.01326	0.760287	0.931687	0.01	1.00696	0.86009	0.970836	0.011	1.00765	0.829197	0.970365
A3GALT2	NM_001080438.1	1740066	ILMN_1668111	1	0.061	1.04319	0.350312	0.801461	0.061	1.04319	0.231279	0.587109	0.027	1.01889	0.580099	0.888868	0	1	0.99623	0.999359
A4GALT	NM_017436.4	3610072	ILMN_1735045	22	0.081	1.05775	0.555225	0.899165	0.45	1.36604	0.000984	0.009867	0.115	1.08298	0.355123	0.772473	0.369	1.29146	0.00341	0.06141
A4GNT	NM_016161.1	6480136	ILMN_1680754	3	-0.045	0.96929	0.473467	0.868424	-0.102	0.93174	0.077029	0.307701	-0.119	0.920826	0.073879	0.384536	-0.057	0.961261	0.329215	0.779402
AAA1	NM_207284.1	2480367	ILMN_2375184	7	-0.009	0.993781	0.848572	0.972288	-0.038	0.974004	0.402757	0.751978	-0.012	0.991717	0.785496	0.952778	-0.029	0.980099	0.553585	0.893936
AAA1	NM_207290.1	2750273	ILMN_1659452	7	-0.056	0.961927	0.199446	0.688027	0.02	1.01396	0.668515	0.896076	0.023	1.01607	0.689477	0.926347	0.075	1.05336	0.111553	0.514865
AAA1	NM_207289.1	5360113	ILMN_1675204	7	0.021	1.01466	0.637242	0.925291	0.098	1.07029	0.072551	0.295858	0.027	1.01889	0.546158	0.875533	0.077	1.05482	0.156373	0.600024
AAA1	NM_207285.1	4560202	ILMN_1767388	7	0.064	1.04536	0.168112	0.649706	0.018	1.01255	0.740902	0.925378	0.029	1.0203	0.620699	0.903964	-0.046	0.968618	0.420068	0.833972
AAA1	NM_207283.1	6180500	ILMN_1673870	7	0.073	1.0519	0.171777	0.654936	0.076	1.05409	0.104681	0.377516	0.098	1.07029	0.086993	0.420462	0.002	1.00139	0.965691	0.994311
AAAS	NM_015665.4	60689	ILMN_1755321	12	0.005	1.00347	0.94408	0.990911	-0.231	0.852044	0.002852	0.023386	-0.273	0.827597	0.001767	0.029072	-0.235	0.849685	0.001202	0.031327
AACS	NM_023928.3	1580504	ILMN_1698554	12	-0.1	0.933033	0.249856	0.733416	-0.141	0.90689	0.03546	0.176115	-0.119	0.920826	0.074529	0.386265	-0.041	0.971981	0.65139	0.929024
AACSL	XM_376454.3	4570132	ILMN_1814092	5	-0.097	0.934975	0.131698	0.59994	-0.03	0.97942	0.655125	0.890881	-0.032	0.978063	0.605113	0.898173	0.067	1.04754	0.319386	0.770975
AADAC	NM_001086.2	6200619	ILMN_1760414	3	-0.043	0.970634	0.365177	0.810958	0.119	1.08598	0.062391	0.266824	0.109	1.07848	0.202776	0.626335	0.162	1.11884	0.033365	0.268683
AADACL1	NM_020792.3	7650020	ILMN_1676336	3	-0.454	0.730016	0.000402	0.032217	0.536	1.44995	7.2e-05	0.001234	0.911	1.88035	1e-06	0.000229	0.99	1.98618	2e-06	0.000845
AADACL1	NM_020792.3	7210327	ILMN_2061446	3	-0.195	0.873573	0.057818	0.441875	0.53	1.44393	7e-06	0.000229	0.683	1.60547	5e-06	0.000529	0.726	1.65405	2.7e-05	0.003271
AADACL2	NM_207365.2	1780408	ILMN_1752884	3	-0.086	0.942131	0.127499	0.593263	-0.062	0.957935	0.232954	0.589115	-0.025	0.982821	0.594662	0.894006	0.024	1.01677	0.673641	0.934708
AADACL3	XM_938346.2	6840400	ILMN_1660703		-0.126	0.916369	0.071428	0.481866	-0.037	0.97468	0.506754	0.818139	-0.081	0.945402	0.257593	0.689608	0.089	1.06363	0.143898	0.578549
AADACL4	NM_001013630.1	2600309	ILMN_1668851	1	0.08	1.05702	0.158825	0.636923	0.039	1.0274	0.487152	0.806375	0.028	1.0196	0.594221	0.893909	-0.041	0.971981	0.447778	0.847563
AADAT	NM_182662.1	6270181	ILMN_1726986	4	0.302	1.23285	0.002588	0.089503	0.26	1.19748	0.011632	0.072713	-0.287	0.819605	0.000625	0.013956	-0.041	0.971981	0.691391	0.939859
AADAT	NM_182662.1	4220717	ILMN_2357031	4	-0.088	0.940826	0.062085	0.453878	-0.074	0.95	0.126144	0.422247	-0.125	0.917004	0.033753	0.237508	0.014	1.00975	0.740297	0.952384
AADAT	NM_182662.1	1110326	ILMN_1809959	4	0.013	1.00905	0.795305	0.960146	-0.012	0.991717	0.819121	0.950401	-0.052	0.964598	0.349877	0.768308	-0.025	0.982821	0.593456	0.910027
AADAT	NM_016228.3	520039	ILMN_2270015	4	0.095	1.06807	0.072261	0.483973	0.065	1.04608	0.26462	0.626631	-0.012	0.991717	0.799217	0.95762	-0.03	0.97942	0.60527	0.913952
AAGAB	NM_024666.3	5490500	ILMN_3237396	15	-0.194	0.874179	0.141666	0.616325	-0.287	0.819605	0.001663	0.015053	0.007	1.00486	0.923582	0.984959	-0.093	0.937571	0.407077	0.825786
AAK1	NM_014911.3	1170332	ILMN_1688755	2	-0.054	0.963262	0.312575	0.779469	-0.033	0.977386	0.455701	0.787338	-0.019	0.986917	0.718971	0.935093	0.021	1.01466	0.683209	0.937528
AAK1	NM_014911.2	6860170	ILMN_1689211	2	-0.042	0.971307	0.438409	0.853531	0.007	1.00486	0.879467	0.968266	0.016	1.01115	0.81701	0.961421	0.049	1.03455	0.365233	0.8024
AAK1	NM_014911.3	4390201	ILMN_1880387	2	0.009	1.00626	0.881627	0.978046	0.059	1.04174	0.26542	0.627339	0.038	1.02669	0.478114	0.844369	0.05	1.03526	0.372095	0.806777
AAMP	NM_001087.3	4610048	ILMN_1653165	2	-0.342	0.788947	0.057687	0.441235	-0.294	0.815637	0.001792	0.01599	-0.118	0.921464	0.098713	0.449723	0.048	1.03383	0.776417	0.958477
AANAT	NM_001088.1	1070703	ILMN_1729835	17	-0.039	0.973329	0.380614	0.821302	-0.058	0.960595	0.23972	0.598136	-0.043	0.970634	0.408246	0.805868	-0.019	0.986917	0.656365	0.930153
AARS	NM_001605.2	290603	ILMN_1662364	16	-0.161	0.894405	0.433205	0.849954	-0.955	0.515842	0	4e-06	-0.412	0.751581	0.000156	0.0052	-0.794	0.576743	0.00356	0.063222
AARS2	NM_020745.2	540255	ILMN_1674698	6	0.168	1.1235	0.109706	0.564128	0.15	1.10957	0.037366	0.183105	-0.038	0.974004	0.441708	0.824803	-0.018	0.987601	0.864276	0.97711
AARSD1	NM_025267.2	60154	ILMN_1700461	17	0.335	1.26138	0.002939	0.095279	0.148	1.10803	0.187017	0.526757	0.074	1.05263	0.477276	0.843873	-0.187	0.87843	0.142728	0.577259
AASDH	NM_181806.2	4150561	ILMN_1784269	4	-0.029	0.980099	0.58325	0.90905	-0.169	0.889459	0.02122	0.117672	-0.134	0.911301	0.024336	0.189974	-0.14	0.907519	0.047925	0.332
AASDHPPT	NM_015423.2	7040717	ILMN_2096191	11	0.111	1.07998	0.149443	0.62661	-0.399	0.758384	0.000161	0.002281	-0.112	0.925304	0.174931	0.590653	-0.51	0.702222	2.2e-05	0.003014
AASDHPPT	NM_015423.2	6060767	ILMN_1698189	11	-0.204	0.86814	0.122686	0.584788	-0.341	0.789494	0.008665	0.057367	0.15	1.10957	0.134272	0.525752	-0.137	0.909408	0.235212	0.696859
AASS	NM_005763.2	60280	ILMN_1678323	7	0.025	1.01748	0.674601	0.934639	-0.017	0.988286	0.771117	0.935985	0.002	1.00139	0.973875	0.994819	-0.042	0.971307	0.559201	0.896593
AASS	NM_005763.2	1500465	ILMN_2157219	7	0.006	1.00417	0.89924	0.981377	0.006	1.00417	0.91	0.977193	0.043	1.03025	0.37172	0.783904	0	1	0.994511	0.999132
AATF	NM_012138.3	6020372	ILMN_1703743	17	-0.072	0.951318	0.537835	0.891954	0.068	1.04826	0.503366	0.815913	0.027	1.01889	0.753261	0.944056	0.14	1.10191	0.317377	0.769658
AATK	NM_001080395.1	5550132	ILMN_1687609	17	0.003	1.00208	0.95188	0.991863	-0.125	0.917004	0.025804	0.137313	-0.059	0.959929	0.296702	0.726859	-0.128	0.915099	0.019465	0.192162
AATK	NM_001080395.1	6370746	ILMN_2068874	17	-0.013	0.99103	0.819045	0.966728	-0.012	0.991717	0.838636	0.956996	-0.041	0.971981	0.497459	0.853097	0	1	0.996431	0.999378
AATK	NM_001080395.1	7400300	ILMN_1699334	17	0.144	1.10496	0.154899	0.632157	0.122	1.08824	0.116723	0.402258	0.02	1.01396	0.844697	0.967272	-0.023	0.984184	0.742967	0.952534
ABAT	NM_020686.4	1110025	ILMN_1670117	16	0.029	1.0203	0.591144	0.911185	0.07	1.04972	0.134895	0.439776	0.01	1.00696	0.813567	0.960912	0.041	1.02883	0.470051	0.856527
ABAT	NM_000663.3	6580291	ILMN_2404407	16	0.007	1.00486	0.875139	0.977325	0.002	1.00139	0.968179	0.991571	0.046	1.0324	0.452736	0.830719	-0.005	0.99654	0.908803	0.985234
ABAT	NM_000663.3	1230592	ILMN_1805104	16	0.1	1.07177	0.042522	0.386555	0.124	1.08975	0.028445	0.148478	0.08	1.05702	0.153745	0.557133	0.024	1.01677	0.636162	0.924304
ABCA1	NM_005502.2	4060358	ILMN_1766054	9	0.158	1.11574	0.012201	0.208372	0.41	1.32869	5.2e-05	0.000965	0.196	1.14552	0.002201	0.034018	0.252	1.19086	0.005929	0.087789
ABCA10	NM_080282.2	7550128	ILMN_2070570	17	0.065	1.04608	0.318053	0.782946	0.064	1.04536	0.232287	0.588293	-0.053	0.96393	0.273947	0.706092	0	1	0.996839	0.999431
ABCA10	NM_080282.3	3190541	ILMN_1753388	17	-0.042	0.971307	0.559937	0.901136	-0.03	0.97942	0.659022	0.892174	-0.036	0.975355	0.637842	0.908612	0.013	1.00905	0.819129	0.968348
ABCA11	NR_002451.1	2320403	ILMN_2232084	4	0.167	1.12272	0.024136	0.29595	0.089	1.06363	0.094298	0.352316	-0.002	0.998615	0.965219	0.993242	-0.077	0.948027	0.250308	0.713821
ABCA12	NM_173076.2	4570152	ILMN_1750250	2	0.062	1.04391	0.226406	0.713857	0.044	1.03097	0.477935	0.800469	0.009	1.00626	0.865565	0.972147	-0.018	0.987601	0.780106	0.959484
ABCA12	NM_015657.3	4900711	ILMN_2361400	2	0.118	1.08523	0.079976	0.50311	0.31	1.23971	0.001688	0.015231	0.192	1.14235	0.008567	0.091714	0.192	1.14235	0.035766	0.279906
ABCA13	NM_152701.2	1780537	ILMN_1704579	7	0.021	1.01466	0.633761	0.924074	0.048	1.03383	0.349515	0.708464	-0.053	0.96393	0.343631	0.763928	0.028	1.0196	0.579652	0.905231
ABCA2	NM_212533.2	2320243	ILMN_1747627	9	-0.309	0.807201	0.002467	0.087169	-0.527	0.693996	1.1e-05	0.0003	-0.328	0.79664	0.002955	0.042025	-0.218	0.859756	0.013333	0.151365
ABCA2	NM_212533.2	450333	ILMN_1687636	9	0.005	1.00347	0.911339	0.984285	-0.013	0.99103	0.801512	0.945568	0.022	1.01537	0.660899	0.915812	-0.018	0.987601	0.686784	0.938591
ABCA3	NM_001089.1	430402	ILMN_1758523	16	-0.08	0.946058	0.096382	0.536641	-0.055	0.962594	0.354199	0.712359	-0.115	0.923382	0.031926	0.228866	0.025	1.01748	0.666793	0.932522
ABCA4	NM_000350.2	6650504	ILMN_1794965	1	0.039	1.0274	0.401564	0.831481	0.177	1.13053	0.004997	0.036642	0.037	1.02598	0.465478	0.837805	0.138	1.10038	0.027963	0.240258
ABCA5	NM_172232.1	3450278	ILMN_1722286	17	-0.071	0.951978	0.472358	0.868023	-0.095	0.936272	0.282984	0.645283	-0.061	0.958599	0.497679	0.853143	-0.024	0.983502	0.650075	0.928811
ABCA5	NM_018672.2	7650253	ILMN_1749001	17	-0.056	0.961927	0.284519	0.759527	-0.037	0.97468	0.478621	0.800883	-0.001	0.999307	0.98571	0.997384	0.019	1.01326	0.673773	0.93477
ABCA5	NM_018672.2	3780445	ILMN_1784176	17	-0.054	0.963262	0.29807	0.769122	0.016	1.01115	0.739324	0.924894	0.054	1.03814	0.304995	0.734177	0.07	1.04972	0.17959	0.631948
ABCA6	NM_080284.2	3400753	ILMN_1701551	17	-0.041	0.971981	0.492762	0.87747	0.034	1.02385	0.494164	0.810196	-0.056	0.961927	0.273144	0.705542	0.075	1.05336	0.204131	0.66308
ABCA6	NM_080284.2	6940519	ILMN_1795507	17	0.014	1.00975	0.759163	0.952703	0.019	1.01326	0.705627	0.911972	0.048	1.03383	0.373945	0.785566	0.004	1.00278	0.914832	0.986334
ABCA7	NM_019112.3	2570100	ILMN_1743205	19	0.251	1.19003	0.006079	0.142739	0.409	1.32777	0.000503	0.005677	-0.144	0.905006	0.240354	0.670996	0.158	1.11574	0.148493	0.585948
ABCA7	NM_019112.3	1710193	ILMN_1729894	19	-0.057	0.961261	0.423658	0.845038	-0.014	0.990343	0.873951	0.966611	0.022	1.01537	0.760666	0.945247	0.043	1.03025	0.57682	0.904123
ABCA7	NM_033308.1	5810091	ILMN_2259319	19	0	1	0.993555	0.998847	0.055	1.03886	0.254139	0.6154	0.026	1.01819	0.582636	0.889957	0.056	1.03958	0.339801	0.786193
ABCA8	NM_007168.2	150035	ILMN_2129886	17	0.016	1.01115	0.704042	0.941075	0.084	1.05995	0.079498	0.314428	0.044	1.03097	0.325842	0.749645	0.068	1.04826	0.153058	0.594147
ABCA8	NM_007168.2	2710392	ILMN_1796801	17	0.043	1.03025	0.430537	0.848483	-0.027	0.981459	0.643085	0.88588	0.044	1.03097	0.354641	0.771798	-0.07	0.952638	0.304083	0.759229
ABCA9	NM_080283.3	5220386	ILMN_1668446	17	0	1	0.996748	0.999392	-0.016	0.988971	0.790057	0.941697	0.012	1.00835	0.806428	0.959471	-0.016	0.988971	0.799932	0.964607
ABCA9	NM_080283.3	4730370	ILMN_1720501	17	0.038	1.02669	0.491899	0.876981	0.035	1.02456	0.5914	0.862904	0.102	1.07326	0.244663	0.675168	-0.003	0.997923	0.963914	0.994259
ABCB1	NM_000927.3	4210039	ILMN_2094875	7	-0.083	0.944092	0.166165	0.647332	-0.105	0.929805	0.082801	0.322906	-0.048	0.967276	0.404687	0.804678	-0.021	0.985549	0.670513	0.933683
ABCB1	NM_000927.3	1230048	ILMN_1812070	7	-0.099	0.93368	0.084961	0.513719	0.002	1.00139	0.972105	0.992504	0.114	1.08222	0.299805	0.729616	0.101	1.07252	0.205139	0.663633
ABCB10	NM_012089.1	4810048	ILMN_1665730	1	-0.278	0.824734	0.000679	0.042762	-0.658	0.633756	1e-06	4.2e-05	-0.41	0.752623	1.9e-05	0.00136	-0.38	0.768438	0.000435	0.016627
ABCB11	NM_003742.2	7330332	ILMN_2232066	2	-0.045	0.96929	0.384041	0.823236	-0.077	0.948027	0.155177	0.476385	-0.015	0.989657	0.793928	0.955992	-0.032	0.978063	0.497775	0.871078
ABCB4	NM_018850.2	1070594	ILMN_1767349	7	0.077	1.05482	0.201235	0.68958	0.109	1.07848	0.061243	0.263224	0.123	1.089	0.075122	0.387888	0.032	1.02243	0.570315	0.901696
ABCB5	NM_178559.3	650376	ILMN_1658257	7	-0.028	0.980779	0.565612	0.903367	-0.037	0.97468	0.489044	0.807348	0.045	1.03168	0.402436	0.802824	-0.009	0.993781	0.863158	0.976929
ABCB6	NM_005689.1	2810367	ILMN_2193980	2	0.422	1.33978	5.2e-05	0.010656	0.795	1.73508	0	5e-06	0.185	1.13682	0.002154	0.033489	0.373	1.29504	0.000201	0.010316
ABCB7	NM_004299.3	5700286	ILMN_1687840	X	0.15	1.10957	0.111123	0.567037	-0.337	0.791686	0.001227	0.011755	-0.106	0.929161	0.13283	0.522451	-0.487	0.713507	0.000409	0.015946
ABCB8	NM_007188.2	3990592	ILMN_2102422	7	-0.178	0.883928	0.044435	0.394097	-0.136	0.910039	0.048663	0.223291	-0.001	0.999307	0.992878	0.998803	0.042	1.02954	0.495786	0.87004
ABCB9	NM_019624.2	6900241	ILMN_2343048	12	0.482	1.39668	0.006065	0.142544	2.047	4.13246	0	0	1.367	2.57934	0	7.3e-05	1.565	2.95878	1e-06	0.000648
ABCB9	NM_019624.2	5290598	ILMN_2343047	12	0.093	1.06659	0.446969	0.857712	1.329	2.51228	0	3e-06	1.257	2.38998	0	7.3e-05	1.236	2.35545	4e-06	0.001319
ABCB9	NM_203444.1	2600315	ILMN_1788928	12	0.003	1.00208	0.945293	0.991019	0.022	1.01537	0.683044	0.90266	0.029	1.0203	0.586521	0.891417	0.019	1.01326	0.718776	0.945786
ABCC1	NM_019901.1	580707	ILMN_2335302	16	-0.064	0.956608	0.299968	0.770558	-0.074	0.95	0.252985	0.613958	-0.08	0.946058	0.185511	0.604804	-0.01	0.993092	0.872908	0.978287
ABCC1	NM_019900.2	1500187	ILMN_1802404	16	-0.095	0.936272	0.152337	0.629754	-0.138	0.908778	0.04966	0.226284	0.046	1.0324	0.561893	0.883006	-0.043	0.970634	0.5162	0.878937
ABCC10	NM_033450.2	650646	ILMN_1776119	6	0.048	1.03383	0.323905	0.785679	-0.021	0.985549	0.707097	0.91245	-0.101	0.932386	0.066099	0.360004	-0.069	0.953299	0.220488	0.680465
ABCC11	NM_145186.2	110138	ILMN_2358714	16	-0.105	0.929805	0.09546	0.534292	-0.065	0.955945	0.181059	0.517994	0.011	1.00765	0.822732	0.962024	0.041	1.02883	0.465359	0.85496
ABCC11	NM_145186.1	6900537	ILMN_1713008	16	0.054	1.03814	0.450458	0.859528	-0.014	0.990343	0.777767	0.93805	0.025	1.01748	0.615213	0.902111	-0.067	0.954621	0.319653	0.7711
ABCC11	NM_033151.3	2600541	ILMN_1732140	16	0.027	1.01889	0.642849	0.926105	0.07	1.04972	0.228612	0.584125	0.047	1.03311	0.386047	0.792509	0.042	1.02954	0.486845	0.865261
ABCC12	NM_033226.2	6290348	ILMN_1762093	16	-0.024	0.983502	0.590213	0.911185	-0.044	0.969962	0.404974	0.753294	0.07	1.04972	0.185305	0.60458	-0.02	0.986233	0.675589	0.935236
ABCC13	NR_003087.1	3990441	ILMN_1709092	21	-0.063	0.957271	0.215736	0.704005	-0.001	0.999307	0.980006	0.994739	-0.024	0.983502	0.663643	0.916785	0.061	1.04319	0.203879	0.662825
ABCC13	NM_138726.2	4250497	ILMN_1678409	21	0.011	1.00765	0.792723	0.959217	-0.019	0.986917	0.679883	0.901368	0.029	1.0203	0.520166	0.864531	-0.03	0.97942	0.525744	0.883579
ABCC13	NM_172024.1	4780553	ILMN_1774344	21	0.062	1.04391	0.293358	0.76527	0.094	1.06733	0.068512	0.28409	0.143	1.1042	0.009394	0.097997	0.032	1.02243	0.600749	0.912788
ABCC2	NM_000392.1	2230746	ILMN_1676278	10	0.098	1.07029	0.348302	0.80057	0.4	1.31951	2.2e-05	0.000509	0.125	1.09051	0.197692	0.619989	0.302	1.23285	0.01189	0.140241
ABCC3	NM_020038.1	60114	ILMN_1717466	17	0.025	1.01748	0.648845	0.927919	-0.005	0.99654	0.914733	0.978545	-0.055	0.962594	0.324747	0.748634	-0.03	0.97942	0.513917	0.877703
ABCC3	NM_003786.2	270615	ILMN_1677814	17	-0.289	0.818469	0.001924	0.074781	-0.648	0.638164	1e-06	5e-05	-0.417	0.74898	7.4e-05	0.003225	-0.358	0.780245	0.000367	0.014779
ABCC4	NM_005845.2	6110181	ILMN_2194009	13	-0.563	0.676893	3e-05	0.007909	-0.568	0.674551	8e-06	0.000239	-0.249	0.841479	0.002208	0.034082	-0.005	0.99654	0.934073	0.989666
ABCC4	NM_005845.2	2450201	ILMN_1788457	13	-0.661	0.63244	0.00039	0.031717	-0.596	0.661586	0.000193	0.002646	-0.234	0.850274	0.096596	0.444977	0.066	1.04681	0.491333	0.867571
ABCC5	NM_001023587.1	3460630	ILMN_2302358	3	0.13	1.09429	0.066012	0.465658	0.131	1.09505	0.011978	0.074377	0.067	1.04754	0.167156	0.579625	0.001	1.00069	0.987361	0.998196
ABCC5	NM_005688.2	6580553	ILMN_1706531	3	0.163	1.11961	0.15963	0.638039	0.32	1.24833	0.000103	0.001618	0.068	1.04826	0.250852	0.682302	0.157	1.11497	0.18102	0.633548
ABCC5	NM_001023587.1	7610050	ILMN_1651964	3	0.202	1.15029	0.003873	0.11085	0.385	1.30586	6.1e-05	0.001097	0.083	1.05922	0.208935	0.633375	0.183	1.13524	0.017393	0.178221
ABCC6	NM_001079528.1	7160603	ILMN_2406654	16	0.003	1.00208	0.959337	0.993013	-0.025	0.982821	0.658157	0.892042	-0.064	0.956608	0.259316	0.691607	-0.028	0.980779	0.631791	0.922915
ABCC6	NM_001171.3	4230093	ILMN_1725414	16	-0.042	0.971307	0.416583	0.840387	-0.021	0.985549	0.744464	0.926064	-0.004	0.997231	0.934535	0.987392	0.021	1.01466	0.741423	0.952384
ABCC6	NM_001079528.1	5310021	ILMN_2293902	16	0.002	1.00139	0.97374	0.995434	-0.067	0.954621	0.234949	0.591946	0.005	1.00347	0.932869	0.987297	-0.069	0.953299	0.136853	0.565882
ABCC6	NM_001171.3	3370332	ILMN_1778352	16	0.056	1.03958	0.267167	0.747083	0.103	1.074	0.094978	0.353991	0.029	1.0203	0.53877	0.872343	0.047	1.03311	0.438141	0.843785
ABCC6	NM_001171.3	3060279	ILMN_1725675	16	0.049	1.03455	0.274498	0.752501	0.054	1.03814	0.268865	0.630513	0.039	1.0274	0.426106	0.81546	0.005	1.00347	0.904051	0.984771
ABCC6	NM_001171.3	7100390	ILMN_1801521	16	0.111	1.07998	0.056087	0.437412	0.108	1.07773	0.096338	0.357679	0.049	1.03455	0.33782	0.759292	-0.002	0.998615	0.970802	0.995237
ABCC6P1	NR_003569.1	4050386	ILMN_3246902	16	-0.007	0.99516	0.880112	0.977827	-0.053	0.96393	0.281512	0.643712	-0.005	0.99654	0.907967	0.981694	-0.046	0.968618	0.28635	0.745196
ABCC6P2	NR_023387.1	1340162	ILMN_3244070	16	-0.049	0.966606	0.417822	0.840773	-0.029	0.980099	0.586409	0.860212	-0.037	0.97468	0.537077	0.872142	0.02	1.01396	0.680479	0.936348
ABCC8	NM_000352.3	4850086	ILMN_1767129	11	0.082	1.05848	0.109798	0.564368	0.023	1.01607	0.640034	0.884741	0.074	1.05263	0.145435	0.544152	-0.06	0.959264	0.282781	0.742057
ABCC9	NM_020298.2	4040025	ILMN_2366473	12	0.005	1.00347	0.915311	0.984956	0.001	1.00069	0.978485	0.994311	-0.045	0.96929	0.415995	0.81044	-0.003	0.997923	0.93559	0.989729
ABCC9	NM_020297.1	4490093	ILMN_1751453	12	-0.019	0.986917	0.647419	0.927919	0.018	1.01255	0.686041	0.903746	0.033	1.02314	0.46003	0.834571	0.037	1.02598	0.402274	0.823566
ABCC9	NM_005691.1	3370408	ILMN_1746196	12	0.064	1.04536	0.224967	0.712699	0.133	1.09657	0.022775	0.124635	0.076	1.05409	0.158117	0.564743	0.07	1.04972	0.229699	0.6896
ABCD1	NM_000033.2	4890609	ILMN_1772189	X	-0.007	0.99516	0.907512	0.983305	0.02	1.01396	0.697646	0.909008	0.167	1.12272	0.0413	0.26975	0.027	1.01889	0.690157	0.93973
ABCD2	NM_005164.2	2940709	ILMN_1652959	12	0	1	0.997796	0.999613	-0.07	0.952638	0.300731	0.663555	-0.014	0.990343	0.820158	0.961832	-0.07	0.952638	0.211372	0.669997
ABCD2	NM_005164.2	4850541	ILMN_2198897	12	-0.007	0.99516	0.870829	0.976813	0.041	1.02883	0.39123	0.742501	0.083	1.05922	0.154903	0.558848	0.048	1.03383	0.261731	0.723048
ABCD3	NM_002858.2	1580736	ILMN_1674032	1	-0.075	0.949342	0.41107	0.836625	-0.264	0.832776	0.002998	0.02428	-0.008	0.99447	0.902586	0.980432	-0.189	0.877214	0.042915	0.311529
ABCD4	NM_020325.1	6420427	ILMN_1746032	14	-0.044	0.969962	0.377073	0.819297	-0.105	0.929805	0.089839	0.341072	-0.027	0.981459	0.641352	0.909714	-0.061	0.958599	0.262901	0.724083
ABCD4	NM_020323.1	7200102	ILMN_1651501	14	0.014	1.00975	0.761761	0.952844	-0.1	0.933033	0.051416	0.232298	0.012	1.00835	0.797374	0.956904	-0.114	0.924023	0.022496	0.209581
ABCD4	NR_003256.1	3130209	ILMN_2343917	14	0.054	1.03814	0.274762	0.752641	0.068	1.04826	0.173746	0.506974	0.018	1.01255	0.729102	0.937273	0.014	1.00975	0.755954	0.95553
ABCD4	NM_020326.2	1430301	ILMN_1737656	14	-0.02	0.986233	0.701847	0.940589	0.06	1.04247	0.304119	0.667085	0.019	1.01326	0.746456	0.942241	0.08	1.05702	0.112764	0.517364
ABCE1	NM_001040876.1	1090543	ILMN_2330267	4	-0.203	0.868742	0.24684	0.730898	-0.429	0.742776	0.000229	0.003026	-0.309	0.807201	0.007744	0.085299	-0.225	0.855595	0.219837	0.679879
ABCE1	NM_001040876.1	5310152	ILMN_1676846	4	-0.188	0.877822	0.440767	0.854142	-0.378	0.769504	0.005574	0.040102	-0.26	0.835088	0.00302	0.042669	-0.19	0.876606	0.455228	0.850917
ABCF1	NM_001025091.1	2190273	ILMN_2392635	6	0.041	1.02883	0.668765	0.932557	0.073	1.0519	0.387615	0.739768	-0.183	0.880869	0.136536	0.529793	0.031	1.02172	0.656653	0.930255
ABCF1	NM_001025091.1	7380113	ILMN_1763875	6	0.486	1.40056	0.035078	0.352414	0.454	1.36983	4e-06	0.000145	-0.095	0.936272	0.081214	0.404597	-0.032	0.978063	0.868162	0.977421
ABCF2	NM_005692.3	2230039	ILMN_2284941	7	-0.046	0.968618	0.329336	0.788711	-0.052	0.964598	0.325137	0.686556	-0.102	0.93174	0.086785	0.419754	-0.006	0.99585	0.89721	0.983304
ABCF2	NM_007189.1	7100039	ILMN_1669201	7	0.01	1.00696	0.870825	0.976813	0.207	1.15429	0.005582	0.040137	-0.099	0.93368	0.074438	0.385963	0.197	1.14631	0.026973	0.234092
ABCF2	NM_005692.3	5420142	ILMN_1781999	7	-0.081	0.945402	0.553873	0.898549	0.012	1.00835	0.889464	0.970606	0.083	1.05922	0.336422	0.758852	0.093	1.06659	0.496664	0.870152
ABCF3	NM_018358.2	4560689	ILMN_1810085	3	-0.047	0.967947	0.348747	0.80057	-0.019	0.986917	0.717536	0.91625	-0.124	0.91764	0.032815	0.23278	0.028	1.0196	0.57576	0.90384
ABCG1	NM_207629.1	4540091	ILMN_1658176	21	0.105	1.07549	0.128789	0.595694	0.042	1.02954	0.456467	0.787741	-0.035	0.976032	0.492777	0.851499	-0.063	0.957271	0.354472	0.795513
ABCG1	NM_207627.1	3440292	ILMN_2262362	21	-0.056	0.961927	0.352245	0.802737	-0.043	0.970634	0.426071	0.766654	-0.028	0.980779	0.608433	0.899014	0.013	1.00905	0.824554	0.969625
ABCG1	NM_207174.1	6450059	ILMN_1695968	21	0.081	1.05775	0.237467	0.723346	0.034	1.02385	0.501838	0.815226	-0.012	0.991717	0.836027	0.965487	-0.047	0.967947	0.443242	0.845861
ABCG1	NM_016818.2	5860377	ILMN_2329927	21	-0.119	0.920826	0.047998	0.408347	-0.013	0.99103	0.779344	0.938362	0.057	1.0403	0.410423	0.807148	0.106	1.07624	0.055633	0.36131
ABCG1	NM_207630.1	4290020	ILMN_1743638	21	0.048	1.03383	0.569618	0.904667	0.04	1.02811	0.486688	0.806114	0.074	1.05263	0.232333	0.663214	-0.007	0.99516	0.934668	0.989725
ABCG1	NM_016818.2	6060377	ILMN_1794782	21	-0.156	0.89751	0.01387	0.222252	-0.107	0.928517	0.045238	0.211392	0.108	1.07773	0.068436	0.366949	0.049	1.03455	0.337212	0.784261
ABCG2	NM_004827.2	7160220	ILMN_1789641	4	0.045	1.03168	0.34947	0.801053	-0.054	0.963262	0.315074	0.677677	0	1	0.991803	0.998708	-0.098	0.934327	0.074371	0.422372
ABCG4	NM_022169.3	3360390	ILMN_1779470	11	0.119	1.08598	0.112129	0.568615	0.195	1.14472	0.02565	0.136726	0.111	1.07998	0.107181	0.470843	0.076	1.05409	0.277878	0.738282
ABCG5	NM_022436.2	6290575	ILMN_1716592	2	0.051	1.03598	0.283276	0.75889	0.002	1.00139	0.967331	0.991313	0.024	1.01677	0.62138	0.904138	-0.049	0.966606	0.313435	0.76653
ABCG8	NM_022437.2	2690367	ILMN_1680309	2	0.007	1.00486	0.896657	0.981041	0.048	1.03383	0.327147	0.688894	0.04	1.02811	0.49437	0.852259	0.041	1.02883	0.415482	0.830424
ABHD1	NM_032604.2	620113	ILMN_1743371	2	-0.007	0.99516	0.924052	0.986818	0.061	1.04319	0.401911	0.751319	0.02	1.01396	0.775013	0.949755	0.068	1.04826	0.214677	0.67442
ABHD10	NM_018394.1	1300328	ILMN_1770031	3	-0.127	0.915734	0.173263	0.65702	-0.305	0.809442	0.002204	0.018973	-0.092	0.938221	0.322886	0.747568	-0.178	0.883928	0.027267	0.236085
ABHD11	NM_148912.2	6110592	ILMN_1737475	7	0.168	1.1235	0.080542	0.50471	-0.06	0.959264	0.394899	0.745636	-0.149	0.901875	0.069651	0.371064	-0.228	0.853818	0.019038	0.189353
ABHD11	NM_148916.2	1940068	ILMN_2338268	7	0.033	1.02314	0.445961	0.856926	-0.067	0.954621	0.188988	0.529493	-0.11	0.926588	0.049999	0.304418	-0.1	0.933033	0.051494	0.346385
ABHD11	NM_031295.3	3170639	ILMN_1753912	7	0.006	1.00417	0.890468	0.979986	0.049	1.03455	0.415389	0.760692	0.032	1.02243	0.497098	0.852989	0.043	1.03025	0.474522	0.858901
ABHD12	NM_001042472.1	7610382	ILMN_2245305	20	-0.107	0.928517	0.024121	0.295852	-0.128	0.915099	0.017842	0.10226	0.179	1.1321	0.011161	0.109841	-0.021	0.985549	0.627105	0.921218
ABHD12	NM_001042472.1	7100615	ILMN_2318685	20	-0.139	0.908148	0.201363	0.68958	-0.17	0.888843	0.008786	0.058046	0.341	1.26663	0.003086	0.04334	-0.031	0.978742	0.768516	0.957712
ABHD12	NM_015600.3	2710615	ILMN_1745116	20	-0.106	0.929161	0.243284	0.727898	0.229	1.17202	0.004001	0.030491	0.476	1.39088	7.9e-05	0.003346	0.336	1.26225	0.004117	0.069561
ABHD12B	NM_181533.3	2690040	ILMN_1707925	14	0.024	1.01677	0.575749	0.906438	-0.061	0.958599	0.204475	0.552141	-0.05	0.965936	0.339822	0.761198	-0.085	0.942785	0.068411	0.406071
ABHD12B	NM_181533.3	4880437	ILMN_2367487	14	-0.088	0.940826	0.095117	0.533532	-0.051	0.965267	0.332463	0.693778	-0.04	0.972655	0.430624	0.818521	0.037	1.02598	0.479679	0.860712
ABHD12B	NM_181533.3	3120274	ILMN_1698311	14	-0.03	0.97942	0.612854	0.918381	0.032	1.02243	0.526657	0.82995	0.012	1.00835	0.810827	0.960305	0.062	1.04391	0.259789	0.721455
ABHD13	NM_032859.2	4810600	ILMN_1785285	13	0.013	1.00905	0.840903	0.971111	0.009	1.00626	0.883391	0.969253	0.049	1.03455	0.439622	0.823506	-0.004	0.997231	0.938681	0.990163
ABHD13	NM_032859.2	5870288	ILMN_2073969	13	0.089	1.06363	0.167017	0.648278	0.06	1.04247	0.336103	0.696803	0.114	1.08222	0.116582	0.49182	-0.03	0.97942	0.500564	0.872097
ABHD14A	NM_015407.3	1430360	ILMN_1794213	3	0.14	1.10191	0.07929	0.501993	0.04	1.02811	0.49814	0.812565	0.146	1.1065	0.03996	0.264102	-0.1	0.933033	0.136092	0.564537
ABHD14B	NM_032750.1	150064	ILMN_2227533	3	0.114	1.08222	0.215064	0.703322	-0.307	0.808321	0.000195	0.002668	-0.392	0.762072	4.7e-05	0.002387	-0.421	0.746907	0.00151	0.036023
ABHD15	NM_198147.1	5340450	ILMN_1769390	17	-0.046	0.968618	0.395075	0.82828	0.091	1.06511	0.119726	0.408571	0.142	1.10343	0.090067	0.428232	0.138	1.10038	0.051894	0.348115
ABHD2	NM_007011.5	6520291	ILMN_1787618	15	0.038	1.02669	0.370637	0.815059	-0.044	0.969962	0.331905	0.693327	0.034	1.02385	0.483516	0.847402	-0.082	0.944747	0.066373	0.398993
ABHD2	NM_152924.3	2970201	ILMN_2403446	15	0.072	1.05117	0.202548	0.690566	0.123	1.089	0.08071	0.31771	0.041	1.02883	0.503852	0.855481	0.051	1.03598	0.457249	0.85182
ABHD2	NM_152924.3	6900475	ILMN_1723662	15	0.088	1.0629	0.116754	0.576196	0.333	1.25963	0.000131	0.001943	0.135	1.09809	0.034695	0.241586	0.245	1.18509	0.002978	0.056131
ABHD3	NM_138340.3	5050241	ILMN_1801767	18	-0.572	0.672684	0.001316	0.061414	-0.343	0.7884	0.002237	0.01921	0.156	1.11419	0.094487	0.440001	0.229	1.17202	0.066935	0.401084
ABHD4	NM_022060.2	3120014	ILMN_1700633	14	-0.054	0.963262	0.270055	0.748295	0.19	1.14076	0.003065	0.024731	0.598	1.51362	4e-06	0.000439	0.244	1.18427	0.001231	0.031765
ABHD5	NM_016006.3	5860215	ILMN_1655702	3	-0.063	0.957271	0.505287	0.880934	0.224	1.16797	0.010605	0.067523	0.386	1.30677	0.001728	0.028662	0.287	1.2201	0.00513	0.08033
ABHD6	NM_020676.4	2690402	ILMN_1706344	3	-0.597	0.661127	6.6e-05	0.011945	-0.329	0.796088	0.001764	0.015782	0.735	1.6644	8e-06	0.00072	0.268	1.20414	0.003806	0.066198
ABHD7	NM_173567.3	1240672	ILMN_1719498	1	-0.218	0.859756	0.024156	0.29595	0.093	1.06659	0.361495	0.718832	0.128	1.09278	0.314289	0.741439	0.312	1.24143	0.016259	0.171077
ABHD8	NM_024527.4	4880288	ILMN_1712707	19	0.329	1.25614	0.008136	0.167449	0.731	1.65979	0	1e-05	0.29	1.22264	8e-05	0.003363	0.402	1.32134	0.003423	0.06158
ABHD9	NM_024794.1	2710070	ILMN_1699750	19	-0.024	0.983502	0.648227	0.927919	-0.064	0.956608	0.298573	0.661278	-0.02	0.986233	0.714424	0.933731	-0.04	0.972655	0.503884	0.873591
ABI1	NM_001012751.1	5130725	ILMN_2329958	10	-0.056	0.961927	0.506193	0.881269	-0.182	0.88148	0.065847	0.276627	-0.166	0.89131	0.050516	0.3063	-0.126	0.916369	0.219328	0.679588
ABI1	NM_005470.2	3520706	ILMN_1739081	10	-0.022	0.984866	0.699739	0.940126	-0.082	0.944747	0.172776	0.505528	0.024	1.01677	0.67904	0.922547	-0.059	0.959929	0.234732	0.696064
ABI2	XM_938458.1	6860487	ILMN_1707274		0.01	1.00696	0.813385	0.964885	-0.033	0.977386	0.520896	0.82677	-0.025	0.982821	0.606109	0.898229	-0.042	0.971307	0.420089	0.833972
ABI2	XM_001126750.1	5820379	ILMN_1720988		-0.225	0.855595	0.007817	0.16479	-0.135	0.91067	0.076938	0.307543	0.08	1.05702	0.30317	0.732716	0.09	1.06437	0.331864	0.781092
ABI2	XM_001126750.1	670326	ILMN_1775944		-0.107	0.928517	0.097068	0.538031	-0.097	0.934975	0.095997	0.356749	0.1	1.07177	0.147759	0.547557	0.01	1.00696	0.86523	0.977142
ABI2	XM_001126750.1	2000100	ILMN_1724497		-0.467	0.723467	0.002743	0.092192	-0.239	0.847332	0.014093	0.084578	0.153	1.11188	0.137316	0.53134	0.228	1.17121	0.013674	0.153618
ABI3	NM_016428.2	3840717	ILMN_1755658	17	0.063	1.04464	0.261996	0.742275	0.027	1.01889	0.649448	0.888772	-0.024	0.983502	0.654417	0.913995	-0.036	0.975355	0.531987	0.885737
ABI3BP	NM_015429.2	6980739	ILMN_1673639	3	-0.132	0.912565	0.040597	0.377515	-0.048	0.967276	0.33934	0.699773	-0.139	0.908148	0.014246	0.130914	0.084	1.05995	0.170923	0.621009
ABL1	NM_005157.3	4180088	ILMN_1713732	9	0.484	1.39862	0.003517	0.10498	0.032	1.02243	0.742203	0.92577	-0.289	0.818469	0.001682	0.028151	-0.452	0.731029	0.0146	0.159257
ABL1	NM_005157.3	4880170	ILMN_2268241	9	0.055	1.03886	0.431691	0.849343	0.019	1.01326	0.768403	0.934965	-0.01	0.993092	0.880173	0.975622	-0.036	0.975355	0.5887	0.908348
ABL1	NM_007313.2	4590440	ILMN_1708922	9	0.023	1.01607	0.699496	0.940027	0.064	1.04536	0.217114	0.570021	-0.004	0.997231	0.930131	0.986785	0.041	1.02883	0.523558	0.882572
ABL2	NM_005158.3	2510520	ILMN_1657870	1	-0.042	0.971307	0.389077	0.82555	-0.005	0.99654	0.914448	0.978395	-0.06	0.959264	0.211234	0.636583	0.037	1.02598	0.439933	0.844233
ABL2	NM_007314.1	4670717	ILMN_2240003	1	0.01	1.00696	0.860121	0.974836	-0.001	0.999307	0.990965	0.997701	0.01	1.00696	0.872179	0.973413	-0.011	0.992404	0.860477	0.976315
ABL2	NM_007314.2	1990288	ILMN_1741628	1	-0.058	0.960595	0.3733	0.816877	0.025	1.01748	0.730432	0.921628	0.13	1.09429	0.131752	0.52019	0.083	1.05922	0.31823	0.770146
ABLIM1	NM_006720.3	2570112	ILMN_1785424	10	0	1	0.998765	0.999868	-0.06	0.959264	0.280362	0.642263	-0.138	0.908778	0.084354	0.413569	-0.06	0.959264	0.536483	0.887416
ABLIM1	NM_001003407.1	6400243	ILMN_2396672	10	-0.234	0.850274	0.126183	0.591174	-0.325	0.798298	0.003975	0.030329	-0.068	0.95396	0.526082	0.867533	-0.091	0.938872	0.409829	0.827388
ABLIM1	NM_002313.5	6130162	ILMN_1696682	10	0.029	1.0203	0.46313	0.864255	0.091	1.06511	0.110869	0.390455	0.016	1.01115	0.792411	0.95534	0.062	1.04391	0.259581	0.721307
ABLIM1	NM_006720.3	3610315	ILMN_1731610	10	0.138	1.10038	0.243995	0.728254	0.146	1.1065	0.157081	0.479401	0.088	1.0629	0.541274	0.87341	0.008	1.00556	0.871086	0.97795
ABLIM2	NM_032432.3	2260471	ILMN_1758825	4	-0.177	0.88454	0.025152	0.301923	-0.4	0.757858	7.5e-05	0.00127	-0.246	0.843231	0.003171	0.044214	-0.223	0.856782	0.001309	0.033197
ABLIM3	NM_014945.2	2350747	ILMN_1656940	5	-0.142	0.906262	0.07968	0.502518	-0.196	0.872968	0.004766	0.035221	-0.113	0.924663	0.103288	0.461581	-0.054	0.963262	0.475797	0.858938
ABO	NM_020469.2	1240575	ILMN_1656979	9	-0.037	0.97468	0.563137	0.902057	-0.086	0.942131	0.161634	0.48677	-0.075	0.949342	0.231042	0.661993	-0.048	0.967276	0.357857	0.798237
ABP1	NM_001091.2	5420440	ILMN_1731433	7	0.026	1.01819	0.679084	0.935448	0.046	1.0324	0.441887	0.777852	0.009	1.00626	0.855974	0.969838	0.02	1.01396	0.774441	0.95807
ABR	NM_001092.3	620240	ILMN_1672878	17	0.753	1.68529	0.016068	0.240601	0.333	1.25963	0.000834	0.008611	-0.281	0.82302	0.006304	0.073146	-0.42	0.747425	0.127587	0.548295
ABR	NM_021962.2	6270753	ILMN_1657045	17	0.049	1.03455	0.368838	0.813633	0.033	1.02314	0.538588	0.836558	-0.017	0.988286	0.755449	0.944571	-0.016	0.988971	0.716988	0.945544
ABR	NM_001092.3	5860431	ILMN_1655114	17	-0.008	0.99447	0.838783	0.970814	0.097	1.06955	0.056118	0.247399	0.012	1.00835	0.813412	0.960912	0.105	1.07549	0.030774	0.255236
ABRA	NM_139166.3	3610382	ILMN_1766991	8	-0.033	0.977386	0.595074	0.91212	-0.024	0.983502	0.685966	0.903746	-0.056	0.961927	0.351312	0.769381	0.009	1.00626	0.847458	0.973921
ABT1	NM_013375.2	6480392	ILMN_1658083	6	0.03	1.02101	0.771997	0.954188	0.047	1.03311	0.495033	0.810824	0.053	1.03742	0.48707	0.848578	0.017	1.01185	0.862907	0.976929
ABTB1	NM_172028.1	6620609	ILMN_2367165	3	-0.021	0.985549	0.790282	0.958672	-0.076	0.948684	0.171539	0.503767	-0.067	0.954621	0.245936	0.676606	-0.055	0.962594	0.463371	0.853932
ABTB1	NM_032548.2	2970044	ILMN_1802096	3	0.034	1.02385	0.758832	0.952674	-0.1	0.933033	0.244175	0.603713	-0.013	0.99103	0.877252	0.974879	-0.134	0.911301	0.163866	0.61161
ABTB2	NM_145804.1	940148	ILMN_1753370	11	0.108	1.07773	0.222437	0.70996	0.001	1.00069	0.991015	0.997701	-0.033	0.977386	0.629472	0.906354	-0.107	0.928517	0.214367	0.674107
ACAA1	NM_001607.2	3520753	ILMN_1738921	3	0.242	1.18263	0.007612	0.162568	0.119	1.08598	0.054219	0.241593	0.06	1.04247	0.521462	0.865039	-0.124	0.91764	0.091002	0.468997
ACAA2	NM_006111.1	1450093	ILMN_1660199	18	1.007	2.00973	1e-06	0.000794	0.728	1.65634	1e-06	3.7e-05	-0.206	0.866938	0.012414	0.118786	-0.278	0.824734	0.001835	0.041079
ACACA	NM_198839.1	6650328	ILMN_1667641	17	0.079	1.05629	0.217072	0.704854	0.016	1.01115	0.781688	0.939011	-0.004	0.997231	0.941003	0.988653	-0.063	0.957271	0.272842	0.734599
ACACA	NM_198836.1	2190414	ILMN_2331636	17	0.187	1.13839	0.310445	0.777714	-0.607	0.656561	4.1e-05	0.000802	-0.678	0.625031	3.4e-05	0.001912	-0.794	0.576743	0.000836	0.024942
ACACA	NM_198839.1	2630692	ILMN_1772123	17	0.313	1.24229	0.014579	0.22748	-0.284	0.821311	0.009853	0.063694	-0.749	0.595016	5e-06	0.000531	-0.597	0.661127	0.001386	0.034301
ACACB	NM_001093.3	2230678	ILMN_1763852	12	0.047	1.03311	0.503797	0.88072	-0.123	0.918276	0.035377	0.175764	-0.117	0.922103	0.043156	0.277133	-0.17	0.888843	0.030972	0.256425
ACAD10	NM_025247.4	6560327	ILMN_1687303	12	0.201	1.14949	0.019281	0.26557	-0.123	0.918276	0.066467	0.278366	-0.135	0.91067	0.051719	0.310698	-0.324	0.798852	0.001014	0.028265
ACAD11	NM_032169.4	3370136	ILMN_1761058	3	0.064	1.04536	0.553169	0.898413	-0.357	0.780786	0.001735	0.015559	0.036	1.02527	0.660665	0.915781	-0.421	0.746907	0.001192	0.031164
ACAD8	NM_014384.1	2650324	ILMN_1724699	11	-0.078	0.94737	0.197027	0.685768	-0.049	0.966606	0.356137	0.713994	-0.167	0.890693	0.021952	0.176466	0.029	1.0203	0.622878	0.920495
ACAD8	NM_014384.2	730671	ILMN_2225595	11	0.111	1.07998	0.059075	0.445729	-0.026	0.98214	0.71493	0.915159	-0.143	0.905634	0.02259	0.180277	-0.137	0.909408	0.093128	0.473427
ACAD9	NM_014049.3	5340561	ILMN_1775579	3	0.312	1.24143	0.12168	0.583996	-0.243	0.844986	0.016136	0.094383	-0.362	0.778085	0.000105	0.004009	-0.555	0.680657	0.019396	0.191637
ACADL	NM_001608.2	130193	ILMN_1660890	2	-0.021	0.985549	0.636621	0.925089	-0.024	0.983502	0.595106	0.864374	0.023	1.01607	0.639044	0.909033	-0.002	0.998615	0.961826	0.993814
ACADM	NM_000016.2	430139	ILMN_1778104	1	-0.273	0.827597	0.074493	0.489751	-0.2	0.870551	0.156507	0.478364	0.281	1.21504	0.029077	0.214868	0.072	1.05117	0.557334	0.895668
ACADM	NM_000016.2	2470279	ILMN_2053679	1	-0.026	0.98214	0.680579	0.935928	-0.035	0.976032	0.659957	0.892472	0.322	1.25006	0.000737	0.01576	-0.008	0.99447	0.902677	0.984336
ACADS	NM_000017.1	110441	ILMN_1795104	12	-0.024	0.983502	0.753502	0.951384	-0.251	0.840314	0.004679	0.034745	-0.182	0.88148	0.007911	0.086614	-0.227	0.85441	0.02462	0.220614
ACADSB	NM_001609.3	3610136	ILMN_1740920	10	-0.016	0.988971	0.71538	0.943373	0.034	1.02385	0.486842	0.806225	-0.08	0.946058	0.11134	0.480451	0.049	1.03455	0.283708	0.743044
ACADVL	NM_001033859.1	1170647	ILMN_1806408	17	0.157	1.11497	0.26848	0.747791	0.255	1.19334	0.034114	0.171194	0.018	1.01255	0.860228	0.970836	0.098	1.07029	0.378487	0.810429
ACADVL	NM_000018.2	610093	ILMN_2263466	17	0.139	1.10114	0.067755	0.471112	0.196	1.14552	0.004546	0.033972	0.183	1.13524	0.016552	0.144928	0.056	1.03958	0.366777	0.803599
ACADVL	NM_000018.2	1240551	ILMN_2352009	17	0.158	1.11574	0.034242	0.348954	0.285	1.21841	0.002259	0.019358	0.315	1.24401	0.014325	0.131485	0.127	1.09202	0.179484	0.631891
ACAN	NM_013227.2	6770470	ILMN_1693148	15	-0.007	0.99516	0.88812	0.9794	0.038	1.02669	0.402878	0.75206	0.015	1.01045	0.73547	0.939004	0.045	1.03168	0.363739	0.801356
ACAP1	NM_014716.2	7210682	ILMN_1808395	17	0.042	1.02954	0.364642	0.810774	0.027	1.01889	0.578999	0.856681	0.022	1.01537	0.668701	0.918086	-0.014	0.990343	0.730195	0.949518
ACAP2	NM_012287.4	4280026	ILMN_3236270	3	-0.3	0.812252	0.000641	0.041601	-0.566	0.675487	1e-06	6e-05	-0.267	0.831046	0.002098	0.032836	-0.266	0.831622	0.00077	0.023808
ACAP3	NM_030649.1	4850215	ILMN_1743847	1	-0.002	0.998615	0.975994	0.995651	-0.024	0.983502	0.674527	0.898989	-0.076	0.948684	0.121406	0.501176	-0.022	0.984866	0.738371	0.952069
ACAT1	NM_000019.2	2070605	ILMN_1800008	11	0.801	1.74231	0.000213	0.022525	0.27	1.20581	0.010876	0.06889	-0.126	0.916369	0.213491	0.640201	-0.531	0.692075	0.000474	0.017483
ACAT2	NM_005891.1	6420056	ILMN_2133799	6	-0.187	0.87843	0.024026	0.295374	-0.2	0.870551	0.009668	0.062767	-0.018	0.987601	0.774083	0.949308	-0.013	0.99103	0.829338	0.970411
ACAT2	NM_005891.2	7330753	ILMN_1708672	6	-0.479	0.717475	0.005268	0.132009	-0.31	0.806642	0.0054	0.039051	0.202	1.15029	0.049417	0.302418	0.169	1.12428	0.183762	0.636788
ACBD3	NM_022735.3	5890112	ILMN_1665945	1	-0.134	0.911301	0.275088	0.752851	0.169	1.12428	0.023359	0.127119	0.302	1.23285	0.002755	0.039979	0.303	1.23371	0.020992	0.201182
ACBD4	NM_024722.1	70068	ILMN_1676288	17	-0.041	0.971981	0.445139	0.856614	-0.1	0.933033	0.103096	0.373823	-0.049	0.966606	0.407765	0.805859	-0.059	0.959929	0.263433	0.724859
ACBD5	NM_145698.2	150156	ILMN_1693250	10	-0.121	0.91955	0.016843	0.246691	-0.06	0.959264	0.208942	0.558926	-0.034	0.976709	0.739224	0.939762	0.061	1.04319	0.18827	0.642971
ACBD5	NM_145698.2	4060435	ILMN_2410362	10	0.006	1.00417	0.916005	0.985118	-0.092	0.938221	0.143703	0.45722	0.025	1.01748	0.739189	0.939762	-0.098	0.934327	0.146385	0.582877
ACBD5	NM_145698.2	3390228	ILMN_2295980	10	0.001	1.00069	0.986531	0.997261	-0.026	0.98214	0.661635	0.893105	0.078	1.05555	0.18719	0.607169	-0.027	0.981459	0.720644	0.94657
ACBD6	NM_032360.2	870349	ILMN_1684271	1	0.06	1.04247	0.354054	0.80389	0.418	1.33607	4.1e-05	0.000805	0.385	1.30586	4.9e-05	0.002445	0.359	1.28254	0.00076	0.023611
ACBD7	XM_928013.1	630678	ILMN_1726388	10	0.036	1.02527	0.467229	0.865418	-0.005	0.99654	0.93471	0.983913	-0.062	0.957935	0.296168	0.726152	-0.041	0.971981	0.542145	0.890086
ACBD7	NM_001039844.2	1410367	ILMN_2106002	10	0.03	1.02101	0.714377	0.942993	-0.012	0.991717	0.802386	0.945837	0.04	1.02811	0.423662	0.813819	-0.041	0.971981	0.607337	0.914363
ACCN1	NM_001094.4	240592	ILMN_1779685	17	-0.044	0.969962	0.392143	0.826826	-0.072	0.951318	0.198994	0.544823	-0.082	0.944747	0.158453	0.565358	-0.027	0.981459	0.596302	0.911651
ACCN1	NM_001094.4	2100255	ILMN_1665932	17	-0.025	0.982821	0.656131	0.929454	-0.068	0.95396	0.216738	0.569519	0.053	1.03742	0.318641	0.744231	-0.043	0.970634	0.383853	0.813425
ACCN2	NM_020039.2	3290445	ILMN_1727251	12	-0.025	0.982821	0.599587	0.9138	-0.021	0.985549	0.659019	0.892174	-0.009	0.993781	0.847898	0.968137	0.004	1.00278	0.926611	0.988592
ACCN2	NM_001095.2	1690050	ILMN_1769694	12	0.457	1.37268	0.003034	0.097087	-0.091	0.938872	0.188933	0.529413	-0.412	0.751581	0.000511	0.01211	-0.548	0.683968	0.000651	0.021583
ACCN3	NM_020322.1	6110482	ILMN_1734479	7	-0.059	0.959929	0.289129	0.762351	-0.064	0.956608	0.179534	0.515596	-0.03	0.97942	0.499146	0.853944	-0.005	0.99654	0.929413	0.989095
ACCN3	NM_020321.1	6130451	ILMN_2368728	7	-0.03	0.97942	0.513372	0.884146	-0.027	0.981459	0.55466	0.844419	0.028	1.0196	0.546162	0.875533	0.003	1.00208	0.950965	0.9919
ACCN4	NM_018674.3	2850341	ILMN_2394897	2	0.049	1.03455	0.310993	0.777973	0.024	1.01677	0.654023	0.890725	-0.005	0.99654	0.922594	0.984674	-0.025	0.982821	0.64573	0.927194
ACCN4	NM_018674.3	3190082	ILMN_2394902	2	0.007	1.00486	0.921627	0.986344	0.002	1.00139	0.969402	0.991792	0.023	1.01607	0.749916	0.9434	-0.004	0.997231	0.933514	0.989666
ACCN4	NM_018674.3	6130408	ILMN_2287535	2	-0.023	0.984184	0.693718	0.939023	-0.031	0.978742	0.593165	0.86335	0.102	1.07326	0.066142	0.360158	-0.008	0.99447	0.906885	0.984995
ACCN5	NM_017419.2	3310397	ILMN_1750295	4	-0.012	0.991717	0.786572	0.9579	-0.007	0.99516	0.909999	0.977193	-0.029	0.980099	0.548453	0.87662	0.006	1.00417	0.924877	0.988259
ACCS	NM_032592.3	3390379	ILMN_3187680	11	0.108	1.07773	0.24772	0.731571	-0.237	0.848508	0.000365	0.00437	-0.193	0.874785	0.005654	0.067738	-0.346	0.786762	0.004319	0.071969
ACCSL	NM_001031854.2	4880612	ILMN_3242266	11	0.001	1.00069	0.989003	0.997949	0.012	1.00835	0.835738	0.956534	0.003	1.00208	0.963783	0.993152	0.012	1.00835	0.876205	0.979108
ACCSL	NM_001031854.2	6130291	ILMN_1780630	11	0.085	1.06069	0.159277	0.637672	-0.003	0.997923	0.945017	0.985875	0.04	1.02811	0.47082	0.840455	-0.088	0.940826	0.109424	0.510217
ACD	NM_022914.2	1300154	ILMN_1716480	16	-0.105	0.929805	0.156893	0.634902	-0.094	0.936921	0.135679	0.441453	0.072	1.05117	0.31794	0.743964	0.011	1.00765	0.832582	0.971028
ACE	NM_000789.2	3830398	ILMN_1779984	17	-0.028	0.980779	0.633036	0.923768	-0.075	0.949342	0.16458	0.491972	-0.059	0.959929	0.241838	0.671994	-0.047	0.967947	0.421217	0.834705
ACE	NM_152830.1	3460364	ILMN_2339410	17	-0.073	0.950659	0.094551	0.532225	-0.074	0.95	0.147232	0.463454	0.003	1.00208	0.947923	0.989721	-0.001	0.999307	0.980524	0.99675
ACE	NM_152831.1	3060725	ILMN_1715192	17	-0.011	0.992404	0.810421	0.964273	-0.003	0.997923	0.955798	0.989409	0.014	1.00975	0.787975	0.953675	0.009	1.00626	0.837325	0.972109
ACE2	NM_021804.1	7100468	ILMN_1667018	X	0.097	1.06955	0.108391	0.562192	0.061	1.04319	0.258546	0.620249	0.056	1.03958	0.303455	0.732716	-0.037	0.97468	0.47166	0.857497
ACER1	NM_133492.1	650131	ILMN_1773243	19	0.054	1.03814	0.309382	0.777178	0.017	1.01185	0.733216	0.92276	-0.019	0.986917	0.700223	0.930632	-0.037	0.97468	0.455621	0.851011
ACER1	NM_133492.1	3360019	ILMN_3241214	19	0.057	1.0403	0.232074	0.719057	0.038	1.02669	0.44962	0.783391	-0.01	0.993092	0.855436	0.969838	-0.018	0.987601	0.693922	0.940366
ACER2	NM_001010887.2	1010307	ILMN_1761000	9	-0.018	0.987601	0.716451	0.943764	0.178	1.13131	0.002442	0.020653	0.319	1.24747	0.000131	0.004674	0.196	1.14552	0.004003	0.068292
ACER2	NM_001010887.2	520500	ILMN_3235340	9	0.082	1.05848	0.143717	0.618593	0.285	1.21841	0.000776	0.008134	0.351	1.27544	0.000133	0.004684	0.203	1.15109	0.011917	0.14045
ACER3	NM_018367.5	2360228	ILMN_3237774	11	-0.029	0.980099	0.661835	0.929954	-0.004	0.997231	0.940909	0.985062	-0.015	0.989657	0.840465	0.966487	0.025	1.01748	0.734826	0.950749
ACHE	NM_015831.1	2190168	ILMN_1735471	7	0.046	1.0324	0.352751	0.80325	0.058	1.04102	0.370629	0.725402	-0.062	0.957935	0.208928	0.633375	0.012	1.00835	0.868053	0.977421
ACHE	NM_015831.1	1710500	ILMN_1780485	7	0.001	1.00069	0.971001	0.994955	0.027	1.01889	0.551991	0.843181	0.035	1.02456	0.525701	0.867533	0.026	1.01819	0.56738	0.900502
ACHE	NM_000665.3	1170594	ILMN_2333219	7	-0.113	0.924663	0.077663	0.49811	0.24	1.18099	0.014495	0.086526	0.238	1.17936	0.000621	0.013889	0.353	1.27721	0.005413	0.082699
ACIN1	NM_014977.2	4860204	ILMN_1699636	14	-0.169	0.889459	0.132335	0.600685	-0.191	0.875998	0.025654	0.136731	0.096	1.06881	0.329033	0.752024	-0.022	0.984866	0.775528	0.958103
ACLY	NM_001096.2	4290279	ILMN_1749014	17	-0.13	0.913831	0.430808	0.848559	-0.66	0.632878	2e-06	9e-05	-0.677	0.625465	0.000126	0.004574	-0.53	0.692555	0.011463	0.136801
ACLY	NM_198830.1	4200259	ILMN_2371379	17	0.172	1.12662	0.17095	0.653192	-0.655	0.635075	3.1e-05	0.000652	-0.862	0.550189	0.000105	0.004009	-0.828	0.56331	1e-05	0.002
ACMSD	NM_138326.2	7040450	ILMN_1727091	2	0.036	1.02527	0.527614	0.888805	0.001	1.00069	0.975861	0.993745	0.02	1.01396	0.665771	0.917147	-0.035	0.976032	0.563015	0.898378
ACN9	NM_020186.1	6040088	ILMN_2134039	7	-0.159	0.895646	0.383332	0.822919	0.032	1.02243	0.659885	0.892472	0.459	1.37459	2.4e-05	0.001554	0.19	1.14076	0.296677	0.754062
ACN9	NM_020186.1	520575	ILMN_1771348	7	0.654	1.57352	6.8e-05	0.012067	0.906	1.87384	1e-06	4.8e-05	0.495	1.40932	3e-05	0.001772	0.251	1.19003	0.020162	0.19662
ACO1	NM_002197.1	2450608	ILMN_1750800	9	-0.301	0.81169	0.008045	0.166624	-0.441	0.736624	8e-06	0.000231	-0.105	0.929805	0.078084	0.396225	-0.14	0.907519	0.117565	0.526351
ACO2	NM_001098.2	3930639	ILMN_1654861	22	-0.3	0.812252	0.000275	0.025872	-0.322	0.79996	7e-05	0.001211	-0.004	0.997231	0.954763	0.991503	-0.022	0.984866	0.66962	0.93326
ACOT1	NM_001037161.1	4810471	ILMN_2121389	14	-0.022	0.984866	0.688548	0.937727	0.022	1.01537	0.687624	0.904217	-0.007	0.99516	0.887181	0.977168	0.044	1.03097	0.515246	0.87834
ACOT1	NM_001037161.1	4900438	ILMN_1715543	14	0.025	1.01748	0.626876	0.921809	0.005	1.00347	0.924768	0.981625	0.032	1.02243	0.558876	0.881496	-0.02	0.986233	0.694696	0.940506
ACOT11	NM_015547.2	7400315	ILMN_2353978	1	-0.119	0.920826	0.015731	0.237432	-0.031	0.978742	0.526588	0.82995	0.013	1.00905	0.820361	0.961872	0.088	1.0629	0.090096	0.466239
ACOT11	NM_147161.2	1050253	ILMN_1739594	1	0.321	1.2492	0.014314	0.225201	-0.26	0.835088	0.003016	0.024394	-0.456	0.729005	2.1e-05	0.001446	-0.581	0.6685	0.000816	0.024605
ACOT12	NM_130767.1	2070181	ILMN_1785474	5	-0.038	0.974004	0.510211	0.88266	0	1	0.996096	0.998904	-0.087	0.941478	0.128391	0.513566	0.038	1.02669	0.454036	0.850133
ACOT2	NM_006821.4	6290059	ILMN_1716237	14	-0.016	0.988971	0.79426	0.959756	0.027	1.01889	0.640207	0.884805	-0.002	0.998615	0.974237	0.994914	0.043	1.03025	0.361702	0.800353
ACOT2	NM_006821.3	1230189	ILMN_2188959	14	-0.011	0.992404	0.802965	0.962329	-0.002	0.998615	0.972282	0.99257	0.032	1.02243	0.578473	0.887886	0.009	1.00626	0.852615	0.974381
ACOT4	NM_152331.2	4780709	ILMN_1764321	14	0.006	1.00417	0.914168	0.984932	-0.028	0.980779	0.599542	0.866158	0.038	1.02669	0.517497	0.862871	-0.034	0.976709	0.46917	0.856236
ACOT6	NM_001037162.1	4920072	ILMN_2156699	14	-0.047	0.967947	0.370135	0.814593	-0.055	0.962594	0.360065	0.717348	-0.071	0.951978	0.300085	0.729842	-0.008	0.99447	0.888483	0.981512
ACOT7	NM_181864.2	4290050	ILMN_1740265	1	-0.01	0.993092	0.929111	0.98825	-0.287	0.819605	0.00392	0.029986	-0.21	0.864537	0.0506	0.30654	-0.277	0.825305	0.019056	0.189388
ACOT7	NM_007274.3	6040403	ILMN_2252621	1	0.004	1.00278	0.9182	0.985478	-0.038	0.974004	0.535993	0.834928	-0.049	0.966606	0.324107	0.748127	-0.042	0.971307	0.495487	0.869818
ACOT7	NM_007274.3	6580639	ILMN_2332250	1	-0.417	0.74898	0.019078	0.263511	-0.39	0.76313	0.010387	0.066442	-0.04	0.972655	0.790726	0.954788	0.027	1.01889	0.543359	0.890278
ACOT7	NM_181865.2	5290564	ILMN_1788078	1	-0.047	0.967947	0.449804	0.858977	-0.052	0.964598	0.343776	0.703194	-0.002	0.998615	0.975986	0.995124	-0.005	0.99654	0.931555	0.989221
ACOT7	NM_181864.2	7610044	ILMN_1719178	1	-0.026	0.98214	0.541766	0.893432	0.026	1.01819	0.565026	0.850382	0.052	1.0367	0.271369	0.70391	0.053	1.03742	0.271209	0.733088
ACOT7	NM_181866.2	2320553	ILMN_1784756	1	0.094	1.06733	0.088385	0.521469	0.126	1.09126	0.017019	0.098353	0.059	1.04174	0.285321	0.716794	0.032	1.02243	0.531164	0.885522
ACOT7	NM_181862.2	3460681	ILMN_1728883	1	0.024	1.01677	0.713144	0.94287	0.066	1.04681	0.316025	0.678367	0.069	1.04899	0.320592	0.745528	0.041	1.02883	0.365335	0.802483
ACOT8	NM_005469.2	2900291	ILMN_1679600	20	-0.149	0.901875	0.048599	0.410442	-0.158	0.896267	0.012261	0.07574	-0.003	0.997923	0.948142	0.989785	-0.009	0.993781	0.873093	0.978287
ACOT9	NM_001037171.1	5220497	ILMN_2367070	X	-0.42	0.747425	0.001438	0.063939	-0.4	0.757858	4.2e-05	0.000813	-0.063	0.957271	0.365917	0.779941	0.021	1.01466	0.794204	0.962858
ACOT9	NM_001033583.2	7160592	ILMN_1658995	X	-0.159	0.895646	0.025274	0.302705	0.172	1.12662	0.056065	0.247326	0.051	1.03598	0.391692	0.796413	0.33	1.25701	0.005158	0.08053
ACOX1	NM_004035.4	6180324	ILMN_1765767	17	0.016	1.01115	0.7966	0.960671	0.076	1.05409	0.263354	0.625187	-0.032	0.978063	0.657757	0.915266	0.06	1.04247	0.237951	0.699937
ACOX1	NM_007292.3	3940408	ILMN_1668839	17	-0.077	0.948027	0.258947	0.739437	-0.06	0.959264	0.364015	0.720869	-0.018	0.987601	0.781556	0.951396	0.017	1.01185	0.714185	0.945134
ACOX1	NM_007292.4	1190327	ILMN_1750158	17	-0.276	0.825878	0.067603	0.470774	-0.215	0.861546	0.015641	0.091988	0.169	1.12428	0.021984	0.176662	0.061	1.04319	0.658499	0.930898
ACOX2	NM_003500.2	1010114	ILMN_1685703	3	-0.512	0.70125	0.005243	0.131662	-0.725	0.604997	1.6e-05	0.000407	-0.141	0.90689	0.183411	0.602826	-0.214	0.862144	0.053751	0.354621
ACOX3	NM_003501.1	4540010	ILMN_1743396	4	-0.137	0.909408	0.156749	0.634722	-0.096	0.935623	0.212186	0.563449	-0.015	0.989657	0.868487	0.97267	0.041	1.02883	0.693674	0.94035
ACOXL	NM_018308.1	1300300	ILMN_1743680	2	-0.057	0.961261	0.268526	0.747805	-0.024	0.983502	0.680064	0.901401	-0.006	0.99585	0.904087	0.980594	0.033	1.02314	0.528754	0.884529
ACP1	NM_001040649.1	6110672	ILMN_2344956	2	-0.022	0.984866	0.854471	0.973937	-0.086	0.942131	0.241122	0.599801	0.233	1.17528	0.041	0.268582	-0.064	0.956608	0.577004	0.904123
ACP1	NM_007099.2	1500152	ILMN_1669633	2	0.192	1.14235	0.017055	0.248647	0.126	1.09126	0.063312	0.269469	0.306	1.23628	0.000242	0.007081	-0.066	0.955283	0.347262	0.791114
ACP2	NM_001610.1	2480025	ILMN_2104830	11	0.015	1.01045	0.887313	0.97925	-0.067	0.954621	0.42729	0.767564	0.047	1.03311	0.679736	0.922691	-0.083	0.944092	0.324429	0.77496
ACP5	NM_001611.2	7050082	ILMN_2078599	19	-0.04	0.972655	0.421633	0.843267	0.006	1.00417	0.904391	0.975398	0.04	1.02811	0.418443	0.811517	0.045	1.03168	0.368452	0.805078
ACP6	NM_016361.2	4670671	ILMN_2234343	1	-0.052	0.964598	0.498439	0.879267	-0.323	0.799406	0.000225	0.002985	-0.329	0.796088	8.9e-05	0.003576	-0.271	0.828745	0.008993	0.116179
ACPL2	NM_152282.2	3800538	ILMN_1706598	3	-0.118	0.921464	0.235135	0.721949	-0.132	0.912565	0.132315	0.434628	-0.069	0.953299	0.510187	0.85905	-0.013	0.99103	0.789573	0.961241
ACPL2	NM_152282.3	5720537	ILMN_2306955	3	-0.004	0.997231	0.961706	0.993164	-0.053	0.96393	0.36866	0.724197	0.039	1.0274	0.532348	0.870186	-0.049	0.966606	0.539432	0.889058
ACPP	NM_001099.2	2680725	ILMN_1758323	3	-0.057	0.961261	0.355802	0.805254	-0.004	0.997231	0.933761	0.983613	0.057	1.0403	0.260224	0.693005	0.053	1.03742	0.41861	0.832785
ACPT	NM_033068.2	6280204	ILMN_2351906	19	0.071	1.05044	0.226614	0.713864	0.026	1.01819	0.639007	0.884451	0.001	1.00069	0.989288	0.998107	-0.045	0.96929	0.391387	0.817292
ACPT	NM_033068.2	2690369	ILMN_1728331	19	-0.057	0.961261	0.487362	0.87429	0.084	1.05995	0.10601	0.380278	0.114	1.08222	0.182527	0.601821	0.141	1.10267	0.101607	0.493819
ACR	NM_001097.2	6900576	ILMN_1705637	22	0.005	1.00347	0.921172	0.986204	-0.011	0.992404	0.835886	0.956534	-0.016	0.988971	0.751009	0.943762	-0.017	0.988286	0.77591	0.95825
ACRBP	NM_032489.2	7510253	ILMN_1784203	12	-0.017	0.988286	0.737948	0.948668	0.074	1.05263	0.230659	0.586258	-0.014	0.990343	0.808594	0.960044	0.091	1.06511	0.175281	0.62636
ACRC	NM_052957.3	3850192	ILMN_1666690	X	-0.043	0.970634	0.46948	0.866662	0.005	1.00347	0.93913	0.984763	-0.012	0.991717	0.854201	0.969383	0.048	1.03383	0.385705	0.814414
ACRV1	NM_020115.3	2570576	ILMN_1654468	11	0.031	1.02172	0.625326	0.921501	-0.036	0.975355	0.42779	0.767903	-0.121	0.91955	0.033369	0.235719	-0.067	0.954621	0.312828	0.765787
ACRV1	NM_020109.3	5550075	ILMN_2320277	11	0.019	1.01326	0.735701	0.948108	0.004	1.00278	0.944923	0.985875	0.007	1.00486	0.899449	0.979832	-0.015	0.989657	0.750326	0.954064
ACSBG1	NM_015162.3	2480730	ILMN_2227011	15	0.001	1.00069	0.983934	0.996879	0.041	1.02883	0.405284	0.753403	-0.003	0.997923	0.946297	0.98932	0.04	1.02811	0.402771	0.823751
ACSBG2	NM_030924.3	1660376	ILMN_1730002	19	-0.053	0.96393	0.375995	0.819035	-0.06	0.959264	0.301275	0.663869	-0.071	0.951978	0.187505	0.607672	-0.007	0.99516	0.915308	0.986416
ACSF2	NM_025149.4	2810253	ILMN_3236756	17	0.335	1.26138	0.010324	0.189456	0.309	1.23885	0.000178	0.00248	-0.115	0.923382	0.0766	0.391939	-0.026	0.98214	0.783818	0.960158
ACSF3	NM_174917.1	5820142	ILMN_1716832	16	-0.075	0.949342	0.290014	0.763367	-0.074	0.95	0.220768	0.575209	-0.058	0.960595	0.394716	0.798564	0.001	1.00069	0.991776	0.998848
ACSL1	NM_001995.2	1030431	ILMN_1684585	4	-0.077	0.948027	0.103976	0.554047	0.03	1.02101	0.567546	0.851299	-0.085	0.942785	0.124423	0.507048	0.107	1.07699	0.076846	0.430175
ACSL3	NM_004457.3	3440367	ILMN_1654414	2	0.018	1.01255	0.757366	0.952179	-0.246	0.843231	0.002743	0.022666	-0.227	0.85441	0.028382	0.211281	-0.264	0.832776	0.003894	0.067177
ACSL3	NM_004457.3	3930593	ILMN_1666096	2	-0.227	0.85441	0.236533	0.722764	-0.913	0.53108	3.2e-05	0.000671	-0.892	0.538867	7.1e-05	0.003121	-0.686	0.621575	0.000624	0.020987
ACSL3	NM_203372.1	1580524	ILMN_2360705	2	-0.391	0.762601	0.015403	0.234304	-1.204	0.43407	0	1.1e-05	-0.898	0.53663	3e-06	0.00041	-0.813	0.569197	0.000723	0.022943
ACSL4	NM_004458.1	7000307	ILMN_1683598	X	-0.34	0.790041	0.012968	0.214362	-0.256	0.837406	0.00649	0.04549	-0.365	0.776469	0.001098	0.020843	0.085	1.06069	0.391413	0.817292
ACSL4	NM_022977.1	130131	ILMN_2391458	X	0.046	1.0324	0.259446	0.739904	0.185	1.13682	0.001624	0.014786	0.066	1.04681	0.188994	0.610217	0.138	1.10038	0.008979	0.116153
ACSL4	NM_022977.1	3800133	ILMN_2285506	X	0.093	1.06659	0.233678	0.720292	0.131	1.09505	0.083546	0.324985	0.112	1.08073	0.137469	0.53154	0.038	1.02669	0.458241	0.851873
ACSL4	NM_022977.1	6580411	ILMN_1691714	X	0.021	1.01466	0.685052	0.937144	0.049	1.03455	0.307724	0.670651	0.12	1.08673	0.035846	0.246617	0.027	1.01889	0.593335	0.909999
ACSL5	NM_203379.1	2320332	ILMN_2273911	10	0.118	1.08523	0.141087	0.615676	-0.144	0.905006	0.073922	0.299449	-0.147	0.903127	0.066481	0.361174	-0.262	0.833931	0.001794	0.040467
ACSL5	NM_203380.1	6380228	ILMN_1807914	10	-0.038	0.974004	0.446253	0.857151	0.03	1.02101	0.540181	0.837176	-0.019	0.986917	0.694973	0.928988	0.068	1.04826	0.179665	0.632042
ACSL5	NM_016234.3	6400707	ILMN_1678517	10	0.021	1.01466	0.67017	0.933168	-0.09	0.939523	0.116722	0.402258	-0.008	0.99447	0.887113	0.977168	-0.112	0.925304	0.040584	0.301636
ACSL5	NM_203379.1	620577	ILMN_2370882	10	0.585	1.50004	0.002435	0.086476	-0.106	0.929161	0.204491	0.552141	-0.392	0.762072	0.002417	0.036328	-0.691	0.619424	0.000225	0.010963
ACSL5	NM_016234.3	7040286	ILMN_1705247	10	0.857	1.81127	0.000181	0.020124	-0.073	0.950659	0.400826	0.750773	-0.546	0.684916	0.00069	0.014952	-0.93	0.524858	1e-05	0.002036
ACSL6	NM_015256.2	5570477	ILMN_2278242	5	0.034	1.02385	0.47523	0.869415	-0.032	0.978063	0.487979	0.806746	-0.061	0.958599	0.235657	0.666524	-0.066	0.955283	0.172706	0.623085
ACSL6	NM_001009185.1	1190746	ILMN_1737418	5	-0.015	0.989657	0.779599	0.956272	-0.024	0.983502	0.638045	0.884083	0.004	1.00278	0.941793	0.988752	-0.009	0.993781	0.865456	0.977142
ACSL6	NM_001009185.1	5890040	ILMN_1730025	5	0.098	1.07029	0.04754	0.406464	0.083	1.05922	0.093455	0.350164	0.031	1.02172	0.547098	0.875651	-0.015	0.989657	0.733521	0.950379
ACSL6	NM_015256.2	6770255	ILMN_2378555	5	-0.013	0.99103	0.755073	0.951838	0.059	1.04174	0.212248	0.563533	0.08	1.05702	0.206098	0.630217	0.072	1.05117	0.10541	0.502255
ACSM1	NM_052956.1	5870669	ILMN_1661434	16	0.037	1.02598	0.411671	0.836821	-0.02	0.986233	0.691905	0.906467	0.013	1.00905	0.794539	0.956054	-0.057	0.961261	0.250813	0.714452
ACSM2A	NM_001010845.2	6550452	ILMN_1809623	16	-0.121	0.91955	0.035773	0.355307	-0.088	0.940826	0.104897	0.377864	0.023	1.01607	0.65244	0.913372	0.033	1.02314	0.430958	0.839309
ACSM2B	NM_182617.2	3390280	ILMN_1765912	16	-0.044	0.969962	0.411795	0.836909	0.001	1.00069	0.982522	0.995314	-0.031	0.978742	0.600225	0.896346	0.046	1.0324	0.414576	0.829998
ACSM2B	NM_182617.2	4760202	ILMN_1746128	16	-0.014	0.990343	0.757468	0.952179	0.001	1.00069	0.975097	0.993733	-0.019	0.986917	0.721947	0.935827	0.016	1.01115	0.758092	0.955871
ACSM2B	NM_182617.2	630228	ILMN_1657592	16	0.011	1.00765	0.815774	0.96577	0.011	1.00765	0.840501	0.957888	0.03	1.02101	0.532609	0.870326	0	1	0.995395	0.999217
ACSM3	NM_005622.3	6580735	ILMN_1771084	16	0.087	1.06216	0.091787	0.5282	-0.055	0.962594	0.311799	0.674823	-0.19	0.876606	0.049526	0.30269	-0.142	0.906262	0.030725	0.255006
ACSM3	NM_202000.2	4180292	ILMN_1662738	16	0.187	1.13839	0.004032	0.113472	-0.023	0.984184	0.701675	0.910335	-0.084	0.943438	0.269302	0.702089	-0.209	0.865137	0.008711	0.113836
ACSM3	NM_005622.3	3840632	ILMN_1685952	16	0.069	1.04899	0.149538	0.626658	0.026	1.01819	0.602289	0.867396	-0.015	0.989657	0.740739	0.940143	-0.043	0.970634	0.411569	0.828378
ACSM4	NM_001080454.1	6980181	ILMN_1791923	12	0.05	1.03526	0.24812	0.731571	0.036	1.02527	0.428751	0.768536	0.013	1.00905	0.77561	0.949808	-0.014	0.990343	0.744137	0.952792
ACSM5	NM_017888.2	4880736	ILMN_2070792	16	-0.051	0.965267	0.419897	0.841942	-0.055	0.962594	0.368416	0.723997	-0.118	0.921464	0.074734	0.386943	-0.004	0.997231	0.941144	0.990246
ACSM5	NM_017888.2	4850092	ILMN_1766966	16	-0.071	0.951978	0.28465	0.759527	-0.087	0.941478	0.076562	0.306483	-0.078	0.94737	0.140006	0.535313	-0.016	0.988971	0.804363	0.965318
ACSM5	NM_017888.2	520364	ILMN_1801698	16	0.017	1.01185	0.745149	0.949551	-0.026	0.98214	0.604463	0.868323	0.084	1.05995	0.228975	0.659304	-0.043	0.970634	0.384447	0.813864
ACSS1	NM_032501.2	5220377	ILMN_1752269	20	-0.087	0.941478	0.191392	0.678381	-0.086	0.942131	0.103695	0.375191	-0.027	0.981459	0.637015	0.908547	0.001	1.00069	0.981474	0.996844
ACSS2	NM_001076552.1	3310019	ILMN_2254962	20	-0.05	0.965936	0.343711	0.797884	0.035	1.02456	0.513284	0.822577	0.005	1.00347	0.92135	0.984487	0.085	1.06069	0.156085	0.599712
ACSS2	NM_139274.1	5570059	ILMN_1742859	20	0.06	1.04247	0.258536	0.739312	0.044	1.03097	0.39249	0.743591	0.091	1.06511	0.129683	0.51601	-0.015	0.989657	0.736723	0.95147
ACSS2	NM_018677.2	1980709	ILMN_1697510	20	-0.031	0.978742	0.477419	0.870356	0.027	1.01889	0.594829	0.864189	0.105	1.07549	0.084321	0.413569	0.059	1.04174	0.285464	0.744826
ACSS2	NM_018677.2	4670544	ILMN_1714197	20	-0.38	0.768438	0.011909	0.205446	-0.139	0.908148	0.038553	0.18764	0.142	1.10343	0.030323	0.220965	0.241	1.18181	0.063438	0.388698
ACSS2	NM_001076552.1	4490524	ILMN_2336595	20	-0.245	0.843816	0.078237	0.499166	-0.205	0.867539	0.018867	0.107139	0.263	1.19997	0.000599	0.013539	0.04	1.02811	0.762898	0.956972
ACSS3	NM_024560.2	2810154	ILMN_1659885	12	0.15	1.10957	0.015306	0.233431	0.068	1.04826	0.266328	0.628426	0.066	1.04681	0.207909	0.63209	-0.082	0.944747	0.208229	0.66701
ACTA1	NM_001100.3	5080132	ILMN_2125869	1	0.013	1.00905	0.821956	0.967379	0.04	1.02811	0.552947	0.843723	0.007	1.00486	0.902971	0.980498	0.027	1.01889	0.635906	0.924296
ACTA2	NM_001613.1	6480059	ILMN_1671703	10	1.286	2.43851	0.000744	0.044744	2.122	4.35297	0	0	1.507	2.84218	0	3.6e-05	0.836	1.78509	0.006294	0.091281
ACTB	NM_001101.2	5270730	ILMN_1777296	7	-0.112	0.925304	0.1271	0.592349	-0.014	0.990343	0.895851	0.972507	-0.02	0.986233	0.810096	0.960221	0.097	1.06955	0.398767	0.821502
ACTB	NM_001101.2	4610390	ILMN_2152131	7	0.103	1.074	0.128087	0.594767	0.082	1.05848	0.27191	0.633011	-0.017	0.988286	0.741847	0.940717	-0.021	0.985549	0.79952	0.964367
ACTB	NM_001101.2	5570132	ILMN_2038777	7	-0.038	0.974004	0.749943	0.950929	0.116	1.08373	0.035633	0.176684	0.153	1.11188	0.112152	0.481988	0.154	1.11265	0.220293	0.680309
ACTBL2	NM_001017992.2	6100600	ILMN_3246895	5	0.036	1.02527	0.49235	0.877292	0.03	1.02101	0.523209	0.82796	0.064	1.04536	0.241137	0.671715	-0.006	0.99585	0.901425	0.98423
ACTC1	NM_005159.4	6940739	ILMN_1829919	15	-0.017	0.988286	0.743007	0.94912	0.052	1.0367	0.386022	0.738423	-0.045	0.96929	0.38542	0.792106	0.069	1.04899	0.258101	0.719901
ACTC1	NM_005159.4	4260201	ILMN_1658660	15	-0.009	0.993781	0.855664	0.974172	-0.085	0.942785	0.105182	0.378343	-0.007	0.99516	0.885635	0.976697	-0.076	0.948684	0.170782	0.621009
ACTG1	NM_001614.2	6510072	ILMN_1704961	17	-0.028	0.980779	0.813625	0.965016	-0.229	0.853226	0.083055	0.3236	-0.204	0.86814	0.053591	0.317812	-0.202	0.869345	0.132699	0.558211
ACTG1	NM_001614.2	3310424	ILMN_2053178	17	-0.023	0.984184	0.767871	0.95392	-0.131	0.913198	0.137052	0.444025	0.017	1.01185	0.802959	0.958394	-0.107	0.928517	0.344787	0.789448
ACTG2	NM_001615.3	4610431	ILMN_1795325	2	-0.049	0.966606	0.353599	0.80373	-0.044	0.969962	0.364761	0.721085	-0.017	0.988286	0.729364	0.937273	0.005	1.00347	0.913636	0.986182
ACTL6A	NM_177989.2	5080603	ILMN_1749297	3	-0.163	0.893166	0.111246	0.567331	-0.428	0.743291	7.8e-05	0.001315	-0.499	0.707597	4.8e-05	0.002422	-0.264	0.832776	0.007617	0.104103
ACTL6A	NM_004301.3	5220358	ILMN_2328280	3	-0.372	0.772711	0.033765	0.346969	-0.66	0.632878	0	2.7e-05	-0.408	0.753667	0.000529	0.012365	-0.288	0.819037	0.070272	0.410759
ACTL6B	NM_016188.3	5390008	ILMN_1657855	7	0.002	1.00139	0.972187	0.995109	-0.003	0.997923	0.961845	0.990436	0.042	1.02954	0.64515	0.91123	-0.005	0.99654	0.925182	0.988259
ACTL7A	NM_006687.2	6960669	ILMN_1717900	9	-0.057	0.961261	0.300594	0.770847	-0.05	0.965936	0.431086	0.769749	-0.014	0.990343	0.809467	0.960153	0.007	1.00486	0.908998	0.985318
ACTL7B	NM_006686.2	7550092	ILMN_1796088	9	-0.057	0.961261	0.363004	0.809498	0.07	1.04972	0.197295	0.542244	0.013	1.00905	0.790717	0.954788	0.127	1.09202	0.083048	0.446611
ACTL8	NM_030812.1	1450100	ILMN_1704078	1	0.014	1.00975	0.737293	0.94851	0.015	1.01045	0.76975	0.935517	-0.058	0.960595	0.220747	0.650031	0.001	1.00069	0.983288	0.9974
ACTN1	NM_001102.2	5080364	ILMN_2232177	14	-0.398	0.75891	0.001679	0.070359	-0.492	0.711039	0.000876	0.008961	0.257	1.19499	0.005181	0.063702	-0.094	0.936921	0.440448	0.844268
ACTN2	NM_001103.1	3400110	ILMN_1654422	1	0.138	1.10038	0.055563	0.436562	0.162	1.11884	0.010897	0.068974	0.1	1.07177	0.086804	0.41977	0.024	1.01677	0.714021	0.945093
ACTN3	NM_001104.1	830348	ILMN_1665691	11	-0.104	0.93045	0.093203	0.529779	0.003	1.00208	0.946513	0.986483	0.005	1.00347	0.92544	0.985338	0.108	1.07773	0.049255	0.337224
ACTN4	NM_004924.3	270437	ILMN_1725534	19	-0.775	0.584389	0.004759	0.124338	-0.605	0.657471	2e-06	8.3e-05	-0.055	0.962594	0.391614	0.796355	0.17	1.12506	0.396335	0.819835
ACTR10	NM_018477.2	2630064	ILMN_1798254	14	-0.096	0.935623	0.202728	0.690566	-0.112	0.925304	0.152741	0.472805	0.006	1.00417	0.96466	0.993236	-0.016	0.988971	0.771783	0.957712
ACTR1A	NM_005736.2	4280561	ILMN_1792314	10	0.384	1.30495	0.123067	0.585637	0.572	1.48658	0.00018	0.002502	0.293	1.22519	0.007593	0.084199	0.188	1.13918	0.403171	0.82392
ACTR1B	NM_005735.2	2120088	ILMN_1695821	2	-0.161	0.894405	0.096865	0.537794	-0.64	0.641713	1e-06	4.5e-05	-0.407	0.75419	0.000169	0.00552	-0.479	0.717475	0.000546	0.019249
ACTR2	NM_001005386.1	5570196	ILMN_2388605	2	-0.265	0.832199	0.050223	0.417156	-0.328	0.79664	0.000616	0.00672	-0.36	0.779165	0.022991	0.182433	-0.063	0.957271	0.563778	0.898681
ACTR3	NM_005721.3	6940176	ILMN_1657153	2	-0.191	0.875998	0.268285	0.747645	-0.115	0.923382	0.089179	0.339848	0.013	1.00905	0.856281	0.969838	0.076	1.05409	0.64014	0.925401
ACTR3B	NM_020445.4	2750403	ILMN_2260392	7	-0.003	0.997923	0.961661	0.993164	-0.091	0.938872	0.201254	0.548221	-0.245	0.843816	0.003467	0.047093	-0.087	0.941478	0.208041	0.666832
ACTR3B	NM_001040135.1	5490278	ILMN_1787513	7	-0.008	0.99447	0.866249	0.976005	-0.057	0.961261	0.267557	0.629325	-0.165	0.891929	0.009483	0.098552	-0.049	0.966606	0.31672	0.769025
ACTR3B	NM_020445.4	4010066	ILMN_2346451	7	-0.034	0.976709	0.40552	0.833043	0.03	1.02101	0.545354	0.840409	-0.026	0.98214	0.55406	0.879284	0.064	1.04536	0.220448	0.680386
ACTR3B	XM_937674.1	6180603	ILMN_1680941		0.04	1.02811	0.376312	0.819035	-0.008	0.99447	0.860256	0.963393	0.011	1.00765	0.802234	0.958246	-0.048	0.967276	0.311277	0.764565
ACTR5	NM_024855.3	2690670	ILMN_1652594	20	0.022	1.01537	0.871283	0.976852	-0.157	0.896888	0.025149	0.134635	-0.471	0.721464	0.000357	0.009283	-0.179	0.883315	0.20475	0.663414
ACTR6	NM_022496.3	1580168	ILMN_1697585	12	-0.166	0.89131	0.215691	0.703968	-0.297	0.813943	0.008065	0.054089	-0.047	0.967947	0.741524	0.94058	-0.131	0.913198	0.264476	0.725995
ACTR8	NM_022899.3	270278	ILMN_1689162	3	-0.072	0.951318	0.144641	0.619728	-0.133	0.911933	0.019865	0.111743	-0.078	0.94737	0.154037	0.557677	-0.06	0.959264	0.225652	0.685527
ACTRT1	NM_138289.2	2710368	ILMN_1815392	X	0.086	1.06142	0.308568	0.776252	0.081	1.05775	0.17336	0.506463	-0.061	0.958599	0.440418	0.823819	-0.005	0.99654	0.948747	0.991449
ACTRT2	NM_080431.4	7100201	ILMN_3241416	1	0.047	1.03311	0.352414	0.803005	0.036	1.02527	0.493913	0.810196	-0.019	0.986917	0.74155	0.94058	-0.01	0.993092	0.818698	0.968276
ACVR1	NM_001105.2	6940360	ILMN_1760490	2	-0.198	0.871758	0.082388	0.507966	-0.148	0.902501	0.136102	0.442246	-0.148	0.902501	0.031243	0.225865	0.05	1.03526	0.708857	0.944008
ACVR1B	NM_004302.3	4570240	ILMN_2243308	12	0.008	1.00556	0.928621	0.988228	-0.064	0.956608	0.224494	0.579776	-0.149	0.901875	0.087854	0.422207	-0.072	0.951318	0.407963	0.826442
ACVR1B	NM_004302.3	1410132	ILMN_1786544	12	0.051	1.03598	0.37251	0.816124	-0.021	0.985549	0.693858	0.907424	-0.023	0.984184	0.669079	0.918139	-0.072	0.951318	0.182143	0.63499
ACVR1B	NM_020327.2	6510717	ILMN_1766723	12	-0.021	0.985549	0.670419	0.933296	-0.044	0.969962	0.398895	0.748875	-0.003	0.997923	0.955116	0.991544	-0.024	0.983502	0.583951	0.906588
ACVR1B	NM_020328.2	2060615	ILMN_1763916	12	0.037	1.02598	0.528255	0.88953	0.06	1.04247	0.251543	0.612267	0.017	1.01185	0.735479	0.939004	0.022	1.01537	0.664341	0.932195
ACVR1C	NM_145259.1	450064	ILMN_1689217	2	0.037	1.02598	0.51419	0.884345	0.012	1.00835	0.853939	0.961655	0.034	1.02385	0.496087	0.852714	-0.025	0.982821	0.728887	0.949092
ACVR2A	NM_001616.3	4590349	ILMN_2152711	2	0.174	1.12818	0.007777	0.164321	0.125	1.09051	0.026298	0.139331	-0.086	0.942131	0.122868	0.504396	-0.048	0.967276	0.302707	0.75854
ACVR2A	NM_001616.3	4260681	ILMN_1670912	2	-0.03	0.97942	0.670154	0.933168	-0.086	0.942131	0.184814	0.523578	-0.028	0.980779	0.671937	0.918964	-0.056	0.961927	0.337806	0.784582
ACVR2B	NM_001106.3	610564	ILMN_1668983	3	-0.001	0.999307	0.984838	0.996989	-0.006	0.99585	0.905427	0.975587	-0.046	0.968618	0.367056	0.780701	-0.005	0.99654	0.933471	0.989666
ACVR2B	NM_001106.3	1450253	ILMN_1824337	3	-0.099	0.93368	0.157391	0.635583	0.026	1.01819	0.620328	0.875632	0.026	1.01819	0.586957	0.891592	0.124	1.08975	0.100311	0.491609
ACVRL1	NM_000020.2	5910451	ILMN_3250257	12	0.02	1.01396	0.671078	0.933636	0.017	1.01185	0.755047	0.930111	0.007	1.00486	0.893223	0.978238	-0.003	0.997923	0.952915	0.992494
ACVRL1	NM_000020.1	4610746	ILMN_1807493	12	-0.089	0.940174	0.238377	0.723932	-0.115	0.923382	0.084947	0.328485	0.026	1.01819	0.691032	0.927142	-0.027	0.981459	0.625999	0.920885
ACY1	NM_000666.1	1400341	ILMN_1683883	3	-0.008	0.99447	0.949516	0.991367	-0.281	0.82302	0.005522	0.039755	-0.241	0.846159	0.17709	0.59411	-0.273	0.827597	0.046234	0.325481
ACY3	NM_080658.1	1170228	ILMN_1670193	11	0.013	1.00905	0.767494	0.95392	-0.003	0.997923	0.953925	0.988961	-0.012	0.991717	0.80608	0.959459	-0.016	0.988971	0.754155	0.955194
ACYP1	NM_001107.3	5910148	ILMN_1694233	14	0.087	1.06216	0.165351	0.646722	0.634	1.55186	1.5e-05	0.000393	0.719	1.64604	1e-06	0.000165	0.547	1.46104	0.000355	0.014523
ACYP1	NM_203488.1	5960142	ILMN_1686432	14	-0.026	0.98214	0.609067	0.917091	0.034	1.02385	0.467903	0.794249	0.043	1.03025	0.399535	0.801282	0.06	1.04247	0.278969	0.739065
ACYP1	NM_001107.3	3440689	ILMN_2319825	14	0.304	1.23456	0.033609	0.346121	0.568	1.48247	2.8e-05	0.000611	0.426	1.3435	0.002576	0.038048	0.264	1.2008	0.047181	0.329618
ACYP2	NM_138448.3	130367	ILMN_1697550	2	0.007	1.00486	0.874305	0.977277	0.02	1.01396	0.658943	0.892144	-0.018	0.987601	0.69968	0.930451	0.013	1.00905	0.775108	0.958099
ACYP2	NM_138448.2	5290672	ILMN_2158705	2	-0.355	0.78187	0.004971	0.127814	-0.242	0.845572	0.003369	0.026579	0.217	1.16231	0.006831	0.077642	0.113	1.08147	0.279202	0.739475
ADA	NM_000022.2	7210192	ILMN_1803686	20	0.39	1.31039	0.007706	0.163405	0.066	1.04681	0.554959	0.844519	-0.237	0.848508	0.053063	0.315674	-0.324	0.798852	0.004165	0.070047
ADAD1	NM_139243.2	3140326	ILMN_1745580	4	-0.006	0.99585	0.90651	0.983162	-0.059	0.959929	0.240021	0.598451	-0.029	0.980099	0.563796	0.883766	-0.053	0.96393	0.297651	0.75468
ADAD2	NM_139174.2	3400424	ILMN_1745108	16	-0.064	0.956608	0.178642	0.664619	0.035	1.02456	0.485093	0.805192	0.005	1.00347	0.921415	0.984487	0.099	1.07103	0.048027	0.332219
ADAL	NM_001012969.1	5910554	ILMN_1725043	15	0.034	1.02385	0.679895	0.935847	-0.014	0.990343	0.763484	0.932981	-0.085	0.942785	0.118294	0.495073	-0.048	0.967276	0.565248	0.899483
ADAM10	NM_001110.2	5290300	ILMN_1718946	15	0.046	1.0324	0.72093	0.944575	-0.3	0.812252	0.012199	0.075422	-0.136	0.910039	0.254546	0.686704	-0.346	0.786762	0.001694	0.03881
ADAM10	NM_001110.2	3130364	ILMN_2148360	15	-0.108	0.927873	0.061413	0.45149	-0.247	0.842647	0.006171	0.043674	-0.121	0.91955	0.045343	0.286124	-0.139	0.908148	0.082215	0.444574
ADAM11	NM_002390.4	1260661	ILMN_1711374	17	-0.019	0.986917	0.686101	0.937296	-0.034	0.976709	0.483225	0.803736	0.002	1.00139	0.981114	0.996041	-0.016	0.988971	0.691815	0.939859
ADAM12	NM_021641.2	520689	ILMN_1726266	10	-0.058	0.960595	0.316242	0.78169	0	1	0.994815	0.998742	-0.061	0.958599	0.252138	0.684071	0.059	1.04174	0.378992	0.810842
ADAM12	NM_003474.3	6420692	ILMN_1785393	10	-0.031	0.978742	0.632741	0.923683	0.033	1.02314	0.56855	0.851589	-0.023	0.984184	0.699141	0.930451	0.064	1.04536	0.214553	0.674379
ADAM12	NM_003474.3	6180392	ILMN_1705689	10	0.024	1.01677	0.588883	0.911111	-0.076	0.948684	0.169317	0.499692	0.043	1.03025	0.63492	0.907912	-0.1	0.933033	0.090873	0.46871
ADAM15	NM_207195.1	3440452	ILMN_1756920	1	0.255	1.19334	0.266698	0.746493	0.041	1.02883	0.6591	0.892176	-0.303	0.810565	0.007882	0.086451	-0.214	0.862144	0.306728	0.761184
ADAM15	NM_003815.3	1980553	ILMN_2384544	1	-0.352	0.783497	0.014478	0.226715	-0.36	0.779165	7.5e-05	0.00127	0.037	1.02598	0.448705	0.828642	-0.008	0.99447	0.944853	0.990538
ADAM15	NM_207195.1	6480131	ILMN_1751500	1	-0.144	0.905006	0.047499	0.406464	-0.092	0.938221	0.167937	0.497621	0.076	1.05409	0.29087	0.721657	0.052	1.0367	0.522172	0.881711
ADAM15	XM_937888.1	3990626	ILMN_1799728		0.037	1.02598	0.677099	0.934952	0.025	1.01748	0.768679	0.93514	0.161	1.11806	0.075112	0.387888	-0.012	0.991717	0.859199	0.97591
ADAM17	NM_003183.4	5420762	ILMN_1765779	2	0.009	1.00626	0.864838	0.975822	-0.012	0.991717	0.838638	0.956996	-0.031	0.978742	0.577944	0.887684	-0.021	0.985549	0.70402	0.942989
ADAM17	NM_003183.4	5260546	ILMN_2121068	2	0.104	1.07475	0.317005	0.782224	0.209	1.15589	0.093063	0.349161	-0.028	0.980779	0.728228	0.937242	0.105	1.07549	0.428181	0.837836
ADAM18	NM_014237.1	6560010	ILMN_2201386	8	0.03	1.02101	0.624102	0.920988	-0.046	0.968618	0.434262	0.772052	-0.055	0.962594	0.39184	0.796557	-0.076	0.948684	0.103644	0.498547
ADAM19	NM_023038.3	4920692	ILMN_1682225	5	-0.111	0.925946	0.062049	0.453764	-0.006	0.99585	0.909997	0.977193	-0.076	0.948684	0.179626	0.597005	0.105	1.07549	0.031724	0.260358
ADAM19	NM_033274.2	5220341	ILMN_1788481	5	-0.068	0.95396	0.20715	0.69468	-0.069	0.953299	0.147357	0.46363	0.013	1.00905	0.766448	0.946721	0	1	0.992482	0.998848
ADAM19	NM_033274.2	6900209	ILMN_1713751	5	0.127	1.09202	0.306955	0.775167	-0.372	0.772711	0.00285	0.023373	-0.88	0.543367	9e-06	0.000817	-0.498	0.708088	0.001124	0.029903
ADAM2	NM_001464.3	6110315	ILMN_1662675	8	0.01	1.00696	0.849265	0.972527	0.075	1.05336	0.284653	0.646995	0.038	1.02669	0.493056	0.851499	0.064	1.04536	0.376296	0.809505
ADAM20	NM_003814.4	2320270	ILMN_1737629	14	0.002	1.00139	0.956218	0.99231	0.033	1.02314	0.488783	0.807087	-0.039	0.973329	0.428973	0.817591	0.03	1.02101	0.460545	0.852903
ADAM21	NM_003813.2	2690368	ILMN_1812112	14	-0.116	0.922742	0.035949	0.356166	-0.09	0.939523	0.075563	0.303715	-0.158	0.896267	0.006291	0.073074	0.026	1.01819	0.592083	0.909583
ADAM21P	NR_003951.1	5310202	ILMN_3241313	14	-0.067	0.954621	0.199865	0.688201	-0.127	0.915734	0.147973	0.464551	-0.125	0.917004	0.026027	0.199074	-0.06	0.959264	0.531584	0.885592
ADAM22	NM_021723.2	1470039	ILMN_1675210	7	0.004	1.00278	0.947537	0.991151	0.01	1.00696	0.870943	0.965758	-0.07	0.952638	0.323316	0.747849	0.005	1.00347	0.920373	0.987498
ADAM22	NM_021721.2	7400600	ILMN_2351754	7	-0.018	0.987601	0.778019	0.955566	-0.056	0.961927	0.264031	0.626148	-0.061	0.958599	0.272661	0.705433	-0.038	0.974004	0.531732	0.885652
ADAM22	NM_021722.2	2490255	ILMN_1706302	7	-0.072	0.951318	0.161726	0.640727	0.017	1.01185	0.729889	0.921507	-0.044	0.969962	0.374496	0.785923	0.089	1.06363	0.072516	0.417326
ADAM23	NM_003812.2	110731	ILMN_2060086	2	-0.01	0.993092	0.852185	0.97346	0.019	1.01326	0.725604	0.919685	0.009	1.00626	0.887388	0.977168	0.029	1.0203	0.526926	0.884134
ADAM28	NM_021777.3	290451	ILMN_1664236	8	-0.085	0.942785	0.110023	0.564836	-0.055	0.962594	0.308105	0.671079	-0.055	0.962594	0.308305	0.737079	0.03	1.02101	0.564236	0.898992
ADAM28	NM_014265.4	7330333	ILMN_1802100	8	-0.077	0.948027	0.154769	0.632003	-0.029	0.980099	0.59114	0.862765	0.065	1.04608	0.49712	0.852989	0.047	1.03311	0.374131	0.807812
ADAM28	NM_021777.3	6180491	ILMN_1664631	8	0.114	1.08222	0.086541	0.517468	0.09	1.06437	0.08168	0.320223	0.12	1.08673	0.17191	0.58669	-0.024	0.983502	0.682392	0.937194
ADAM29	NM_014269.3	1770672	ILMN_2194158	4	0.055	1.03886	0.248925	0.732713	0.041	1.02883	0.404883	0.753294	0.014	1.00975	0.767713	0.946721	-0.014	0.990343	0.749319	0.954064
ADAM30	NM_021794.2	830601	ILMN_2100871	1	-0.007	0.99516	0.897591	0.981226	-0.04	0.972655	0.468024	0.794249	-0.096	0.935623	0.097071	0.445969	-0.033	0.977386	0.53792	0.888296
ADAM32	NM_145004.4	6450164	ILMN_2293012	8	-0.003	0.997923	0.972155	0.995109	0.007	1.00486	0.919361	0.980072	-0.036	0.975355	0.540218	0.872811	0.01	1.00696	0.910555	0.985754
ADAM32	NM_145004.5	5860541	ILMN_1798045	8	0.007	1.00486	0.873655	0.977277	-0.023	0.984184	0.631936	0.881538	0.004	1.00278	0.947276	0.989681	-0.029	0.980099	0.520028	0.880745
ADAM32	NM_145004.5	5050328	ILMN_1806841	8	0.033	1.02314	0.441846	0.854761	0.04	1.02811	0.392217	0.743422	0.019	1.01326	0.692164	0.927527	0.007	1.00486	0.878945	0.979359
ADAM32	XM_940500.1	7550491	ILMN_1703383		0.034	1.02385	0.511193	0.883223	-0.048	0.967276	0.287407	0.649935	0.033	1.02314	0.569701	0.885716	-0.083	0.944092	0.132709	0.558211
ADAM33	NM_153202.1	3420025	ILMN_1671297	20	-0.024	0.983502	0.590204	0.911185	-0.061	0.958599	0.213896	0.565525	0.013	1.00905	0.818563	0.961672	-0.038	0.974004	0.38544	0.814353
ADAM33	NM_025220.2	1440224	ILMN_1651657	20	-0.033	0.977386	0.465004	0.865082	-0.001	0.999307	0.984897	0.995907	0.031	1.02172	0.610554	0.900025	0.033	1.02314	0.496879	0.870344
ADAM3A	NR_001569.1	4150292	ILMN_2223911	8	-0.086	0.942131	0.11308	0.570442	-0.008	0.99447	0.874319	0.966769	-0.049	0.966606	0.328539	0.752024	0.079	1.05629	0.167643	0.617379
ADAM3A	NR_001569.1	1430241	ILMN_1795204	8	-0.095	0.936272	0.22406	0.711497	-0.086	0.942131	0.198798	0.544539	-0.047	0.967947	0.520582	0.864675	0.009	1.00626	0.855188	0.974951
ADAM3A	NR_001569.1	1170390	ILMN_1669486	8	-0.071	0.951978	0.245185	0.729235	0.036	1.02527	0.53345	0.833829	0.004	1.00278	0.946155	0.989264	0.106	1.07624	0.061666	0.381994
ADAM5	XR_001286.1	3850379	ILMN_1764554		0.012	1.00835	0.791456	0.958752	-0.031	0.978742	0.567568	0.851299	-0.013	0.99103	0.808765	0.960088	-0.043	0.970634	0.369533	0.80563
ADAM5	XR_001283.1	1770082	ILMN_1685531		0.05	1.03526	0.399919	0.830642	0.013	1.00905	0.814818	0.94949	0.03	1.02101	0.63817	0.908802	-0.037	0.97468	0.509504	0.876232
ADAM5P	NR_001448.1	540195	ILMN_2302214	8	0.077	1.05482	0.172876	0.65654	0.114	1.08222	0.052197	0.234885	0.117	1.08448	0.051811	0.311035	0.038	1.02669	0.359811	0.799153
ADAM6	NR_002224.1	6480634	ILMN_1783312	14	0.025	1.01748	0.736206	0.948124	0.015	1.01045	0.826457	0.953518	-0.007	0.99516	0.91537	0.982916	-0.01	0.993092	0.851626	0.974234
ADAM6	NR_002224.1	7040601	ILMN_2143210	14	-0.003	0.997923	0.940399	0.989951	0.029	1.0203	0.578545	0.85643	0.014	1.00975	0.775318	0.949798	0.032	1.02243	0.529133	0.88462
ADAM7	NM_003817.2	1260424	ILMN_1750294	8	0.04	1.02811	0.358955	0.807417	0.013	1.00905	0.781861	0.939026	0.027	1.01889	0.577688	0.887545	-0.026	0.98214	0.587831	0.90803
ADAM8	NM_001109.3	780725	ILMN_1708348	10	-0.006	0.99585	0.906582	0.983162	0.008	1.00556	0.883542	0.969253	0.015	1.01045	0.737819	0.939638	0.014	1.00975	0.826624	0.97014
ADAM9	NM_003816.2	2940730	ILMN_1727524	8	0.238	1.17936	0.003459	0.10404	0.17	1.12506	0.008941	0.05892	-0.04	0.972655	0.639549	0.909249	-0.068	0.95396	0.193327	0.649416
ADAMDEC1	NM_014479.2	1690192	ILMN_1716909	8	-0.04	0.972655	0.548783	0.896287	-0.063	0.957271	0.292786	0.654722	-0.111	0.925946	0.103166	0.461391	-0.023	0.984184	0.65447	0.929877
ADAMDEC1	NM_014479.2	2470184	ILMN_2103107	8	-0.013	0.99103	0.870988	0.976813	0.05	1.03526	0.328241	0.690183	0.092	1.06585	0.069368	0.370182	0.063	1.04464	0.454547	0.850356
ADAMTS1	NM_006988.3	6900086	ILMN_1673566	21	0.033	1.02314	0.557854	0.900644	0.083	1.05922	0.090517	0.342871	-0.015	0.989657	0.815038	0.960925	0.05	1.03526	0.37354	0.807642
ADAMTS10	NM_030957.2	840370	ILMN_1751168	19	0.023	1.01607	0.686578	0.937466	0.048	1.03383	0.449386	0.7833	0.029	1.0203	0.560358	0.882401	0.025	1.01748	0.723756	0.9477
ADAMTS12	NM_030955.2	4060682	ILMN_1660970	5	0.02	1.01396	0.739882	0.948673	-0.039	0.973329	0.533046	0.833737	0.041	1.02883	0.497401	0.853091	-0.06	0.959264	0.254442	0.716966
ADAMTS13	NM_139027.2	4200735	ILMN_2413732	9	0.014	1.00975	0.799336	0.961308	0.015	1.01045	0.776259	0.937556	-0.06	0.959264	0.326867	0.750546	0.002	1.00139	0.967176	0.994375
ADAMTS13	NM_139027.2	1030253	ILMN_1787386	9	-0.039	0.973329	0.404741	0.832437	0.011	1.00765	0.843406	0.958333	-0.025	0.982821	0.678672	0.922212	0.05	1.03526	0.318784	0.770739
ADAMTS13	NM_139025.2	1240470	ILMN_2286570	9	0.032	1.02243	0.482603	0.87251	0.005	1.00347	0.918335	0.979933	-0.015	0.989657	0.760108	0.945247	-0.027	0.981459	0.629258	0.922224
ADAMTS14	NM_080722.3	4230341	ILMN_1676452	10	-0.034	0.976709	0.53585	0.891362	-0.032	0.978063	0.531432	0.832703	-0.046	0.968618	0.387127	0.79303	0.002	1.00139	0.96787	0.994603
ADAMTS14	NM_139155.2	7610372	ILMN_2358134	10	-0.108	0.927873	0.031673	0.337586	-0.148	0.902501	0.028047	0.146921	-0.041	0.971981	0.39345	0.797583	-0.04	0.972655	0.514172	0.877762
ADAMTS14	NM_080722.3	2000538	ILMN_1873412	10	0.07	1.04972	0.28759	0.761265	0.048	1.03383	0.428303	0.768233	0.062	1.04391	0.353623	0.771074	-0.022	0.984866	0.624699	0.920712
ADAMTS15	NM_139055.1	6520458	ILMN_1683781	11	-0.053	0.96393	0.38094	0.821302	-0.029	0.980099	0.60906	0.870237	0.035	1.02456	0.564072	0.883855	0.024	1.01677	0.612621	0.916017
ADAMTS16	NM_139056.1	7320519	ILMN_1726247	5	0.083	1.05922	0.147762	0.623633	-0.049	0.966606	0.382282	0.735431	0.07	1.04972	0.194893	0.61612	-0.131	0.913198	0.068718	0.40699
ADAMTS17	NM_139057.2	4040494	ILMN_1682989	15	-0.006	0.99585	0.89684	0.981041	-0.06	0.959264	0.230531	0.586128	-0.068	0.95396	0.149466	0.550395	-0.055	0.962594	0.284253	0.743364
ADAMTS18	NM_199355.2	2030487	ILMN_1739872	16	0.02	1.01396	0.741584	0.949097	-0.061	0.958599	0.240867	0.599387	-0.035	0.976032	0.480694	0.845912	-0.081	0.945402	0.232748	0.693422
ADAMTS18	NM_199355.2	3290133	ILMN_1770152	16	-0.027	0.981459	0.638137	0.925487	-0.07	0.952638	0.242473	0.60158	0.035	1.02456	0.659767	0.915586	-0.043	0.970634	0.340846	0.786815
ADAMTS19	NM_133638.2	70487	ILMN_1656171	5	-0.006	0.99585	0.878133	0.977827	-0.052	0.964598	0.315358	0.67795	0.009	1.00626	0.869957	0.972942	-0.045	0.96929	0.361702	0.800353
ADAMTS2	NM_014244.2	3400600	ILMN_1796628	5	-0.013	0.99103	0.79769	0.960867	0.035	1.02456	0.483452	0.803817	0.013	1.00905	0.806997	0.959613	0.048	1.03383	0.314927	0.768092
ADAMTS2	NM_021599.1	7150609	ILMN_1811765	5	0.024	1.01677	0.625406	0.92156	0.066	1.04681	0.185518	0.524654	0.02	1.01396	0.760942	0.945367	0.042	1.02954	0.359101	0.798856
ADAMTS20	NM_025003.3	4010035	ILMN_1787908	12	-0.02	0.986233	0.675588	0.934725	-0.032	0.978063	0.524107	0.828331	0.015	1.01045	0.803968	0.95877	-0.012	0.991717	0.822349	0.96891
ADAMTS20	NM_025003.3	4060747	ILMN_1651717	12	-0.027	0.981459	0.660007	0.92982	-0.013	0.99103	0.830384	0.954971	0.024	1.01677	0.742869	0.94133	0.014	1.00975	0.750525	0.9541
ADAMTS20	NM_175851.1	2650592	ILMN_1791795	12	0.034	1.02385	0.50228	0.880224	-0.038	0.974004	0.467763	0.794182	0.034	1.02385	0.514651	0.861198	-0.072	0.951318	0.105949	0.503604
ADAMTS3	NM_014243.1	2120364	ILMN_1703803	4	0.009	1.00626	0.851888	0.973457	-0.046	0.968618	0.35218	0.710443	-0.067	0.954621	0.260931	0.69388	-0.055	0.962594	0.294258	0.751753
ADAMTS4	NM_005099.3	1660497	ILMN_2092933	1	0.014	1.00975	0.758737	0.952674	-0.137	0.909408	0.055475	0.245755	-0.134	0.911301	0.048288	0.297899	-0.151	0.900626	0.0608	0.378716
ADAMTS5	NM_007038.2	6180332	ILMN_1681886	21	0.011	1.00765	0.790535	0.958672	-0.091	0.938872	0.074183	0.300184	-0.022	0.984866	0.628182	0.905912	-0.102	0.93174	0.057478	0.368151
ADAMTS6	NM_197941.2	20100	ILMN_1767362	5	-0.03	0.97942	0.535445	0.891268	0.098	1.07029	0.046979	0.217591	0.029	1.0203	0.698539	0.930262	0.128	1.09278	0.023722	0.215576
ADAMTS7	NM_014272.2	3440451	ILMN_2211790	15	0.051	1.03598	0.223298	0.710638	-0.083	0.944092	0.094699	0.353297	-0.008	0.99447	0.851516	0.968894	-0.134	0.911301	0.0135	0.152559
ADAMTS7	NM_014272.3	240673	ILMN_3251322	15	-0.005	0.99654	0.927199	0.987801	-0.009	0.993781	0.875291	0.967226	0.011	1.00765	0.840331	0.966461	-0.004	0.997231	0.939233	0.990163
ADAMTS8	NM_007037.3	2480239	ILMN_1672403	11	-0.011	0.992404	0.838358	0.970779	0.032	1.02243	0.703734	0.911048	0.045	1.03168	0.468306	0.839126	0.043	1.03025	0.606904	0.914231
ADAMTS9	NM_182920.1	1570382	ILMN_1805543	3	0.057	1.0403	0.20648	0.693595	-0.021	0.985549	0.643048	0.885879	0.028	1.0196	0.543608	0.874537	-0.079	0.946714	0.123888	0.540225
ADAMTSL1	NM_139238.1	2470044	ILMN_1684919	9	-0.027	0.981459	0.597133	0.912718	-0.033	0.977386	0.487553	0.806559	-0.072	0.951318	0.15018	0.551781	-0.006	0.99585	0.897968	0.983426
ADAMTSL1	NM_052866.3	6180209	ILMN_1722621	9	-0.046	0.968618	0.322748	0.784873	-0.023	0.984184	0.62658	0.878776	-0.052	0.964598	0.333548	0.756745	0.023	1.01607	0.571705	0.902076
ADAMTSL1	NM_052866.3	5890326	ILMN_1705250	9	0.001	1.00069	0.987235	0.997484	-0.028	0.980779	0.579784	0.85703	-0.018	0.987601	0.696498	0.929765	-0.029	0.980099	0.604286	0.91362
ADAMTSL1	NM_001040272.4	3140368	ILMN_1727084	9	-0.005	0.99654	0.915161	0.984956	-0.03	0.97942	0.632175	0.881703	0.006	1.00417	0.895987	0.979202	-0.024	0.983502	0.690554	0.939859
ADAMTSL1	NM_139264.1	580747	ILMN_1706992	9	0.011	1.00765	0.83896	0.970814	-0.063	0.957271	0.190555	0.53225	0.013	1.00905	0.766758	0.946721	-0.074	0.95	0.201245	0.659587
ADAMTSL2	NM_014694.2	4810575	ILMN_1721495	9	-0.022	0.984866	0.693064	0.938978	0.034	1.02385	0.517036	0.824434	0.006	1.00417	0.91397	0.982595	0.056	1.03958	0.266388	0.728204
ADAMTSL3	NM_207517.2	5130400	ILMN_1798690	15	-0.045	0.96929	0.427006	0.846496	-0.083	0.944092	0.163226	0.489581	-0.08	0.946058	0.185146	0.604345	-0.038	0.974004	0.41048	0.827707
ADAMTSL4	NM_025008.3	10286	ILMN_1687035	1	0.015	1.01045	0.804964	0.962693	0.045	1.03168	0.473179	0.797657	-0.04	0.972655	0.452952	0.830719	0.03	1.02101	0.662764	0.931697
ADAMTSL4	NM_025008.3	780678	ILMN_1762294	1	0.059	1.04174	0.270544	0.748781	0.095	1.06807	0.071818	0.29389	-0.035	0.976032	0.470988	0.840455	0.036	1.02527	0.488061	0.866224
ADAMTSL4	NM_019032.4	780315	ILMN_1777683	1	0.029	1.0203	0.532646	0.890305	0.021	1.01466	0.713467	0.914793	0.021	1.01466	0.636007	0.90824	-0.008	0.99447	0.895104	0.98258
ADAMTSL5	NM_213604.1	3460356	ILMN_1793040	19	-0.074	0.95	0.26727	0.747129	-0.079	0.946714	0.221855	0.576709	-0.089	0.940174	0.289881	0.720892	-0.005	0.99654	0.920276	0.987498
ADAP1	NM_006869.2	7570669	ILMN_3247424	7	-0.059	0.959929	0.301297	0.771405	0.043	1.03025	0.620671	0.875831	0.176	1.12975	0.049106	0.301307	0.102	1.07326	0.270606	0.73263
ADAP2	NM_018404.2	3990433	ILMN_1763000	17	0.156	1.11419	0.361785	0.808968	0.129	1.09354	0.077478	0.308929	-0.093	0.937571	0.141338	0.537969	-0.028	0.980779	0.867759	0.977421
ADAR	NM_001111.3	2900450	ILMN_1776777	1	0.365	1.28788	0.040963	0.379085	-0.121	0.91955	0.059305	0.257441	-0.352	0.783497	0.002847	0.040983	-0.486	0.714002	0.009414	0.119668
ADAR	NM_015840.2	5490433	ILMN_2320964	1	-0.185	0.879649	0.120715	0.582149	-0.531	0.692075	1.4e-05	0.000359	-0.134	0.911301	0.068733	0.367707	-0.346	0.786762	0.006869	0.096825
ADAR	NM_001025107.1	5130612	ILMN_1706963	1	-0.016	0.988971	0.784	0.957247	-0.053	0.96393	0.320506	0.682472	-0.006	0.99585	0.90362	0.980585	-0.037	0.97468	0.563813	0.898681
ADARB1	NM_015833.2	4760079	ILMN_2319326	21	-0.017	0.988286	0.728607	0.946873	-0.172	0.887611	0.005548	0.039929	-0.074	0.95	0.157392	0.563481	-0.155	0.898132	0.006353	0.091744
ADARB1	NM_001112.2	2320228	ILMN_1697628	21	-0.014	0.990343	0.749541	0.950649	0.008	1.00556	0.861353	0.963393	0.051	1.03598	0.275852	0.707949	0.022	1.01537	0.641606	0.925736
ADARB1	NM_001033049.1	6520072	ILMN_1657442	21	-0.029	0.980099	0.543869	0.894436	0.048	1.03383	0.339231	0.699694	0.064	1.04536	0.239808	0.67038	0.077	1.05482	0.092652	0.472489
ADARB1	NM_001112.2	7330097	ILMN_1679797	21	-0.095	0.936272	0.337925	0.794046	-0.386	0.765248	0.000579	0.006384	-0.38	0.768438	0.002409	0.036255	-0.291	0.817335	0.001623	0.037722
ADARB2	NM_018702.1	6110519	ILMN_1749493	10	0.021	1.01466	0.712137	0.94287	-0.045	0.96929	0.368513	0.723997	-0.024	0.983502	0.663949	0.91687	-0.066	0.955283	0.25625	0.718722
ADAT1	NM_012091.2	1710204	ILMN_1657139	16	0.072	1.05117	0.458634	0.862603	-0.066	0.955283	0.42619	0.766711	-0.133	0.911933	0.136537	0.529793	-0.138	0.908778	0.027667	0.238457
ADAT2	NM_182503.2	2760725	ILMN_3245693	6	-0.015	0.989657	0.76622	0.953613	-0.066	0.955283	0.231621	0.58744	-0.114	0.924023	0.058054	0.332373	-0.05	0.965936	0.340647	0.786815
ADAT3	NM_138422.1	2230253	ILMN_1806275	19	-0.125	0.917004	0.268199	0.747642	0.12	1.08673	0.081597	0.320054	0.56	1.47427	0.000111	0.004173	0.245	1.18509	0.049662	0.338779
ADC	NM_052998.2	130707	ILMN_1659599	1	0.046	1.0324	0.487186	0.874283	-0.001	0.999307	0.993107	0.998165	-0.065	0.955945	0.377129	0.787762	-0.047	0.967947	0.384872	0.814189
ADCK1	NM_020421.2	780379	ILMN_1698777	14	-0.122	0.918913	0.12065	0.582149	-0.409	0.753145	0.000111	0.001716	-0.369	0.774319	0.000315	0.008486	-0.287	0.819605	0.002924	0.05542
ADCK2	NM_052853.3	1780647	ILMN_1663132	7	0.343	1.26839	0.13929	0.611907	0.595	1.51047	6.3e-05	0.001121	0.176	1.12975	0.045921	0.288352	0.252	1.19086	0.282389	0.741781
ADCK4	NM_024876.2	4290053	ILMN_1700349	19	0.086	1.06142	0.188151	0.675802	-0.087	0.941478	0.23618	0.593308	-0.201	0.869947	0.007056	0.079535	-0.172	0.887611	0.058498	0.371816
ADCK5	NM_174922.3	2480709	ILMN_1761309	8	0.018	1.01255	0.737527	0.948548	-0.078	0.94737	0.18589	0.525114	-0.031	0.978742	0.556575	0.880483	-0.096	0.935623	0.080012	0.438256
ADCY1	NM_021116.1	580561	ILMN_2120555	7	0.017	1.01185	0.681666	0.936081	0.06	1.04247	0.207443	0.556912	0.006	1.00417	0.921432	0.984487	0.043	1.03025	0.322987	0.773625
ADCY1	NM_021116.1	610592	ILMN_1742073	7	0.027	1.01889	0.58181	0.908762	0.049	1.03455	0.355329	0.713161	0.053	1.03742	0.277027	0.708831	0.021	1.01466	0.696746	0.941067
ADCY10	NM_018417.3	5690100	ILMN_3241894	1	-0.028	0.980779	0.538538	0.89224	-0.015	0.989657	0.776687	0.937579	-0.012	0.991717	0.81018	0.960221	0.013	1.00905	0.799774	0.964508
ADCY2	NM_020546.2	2970288	ILMN_1810691	5	0.05	1.03526	0.307085	0.775167	0.009	1.00626	0.844623	0.958512	0.012	1.00835	0.811272	0.960452	-0.041	0.971981	0.439438	0.844028
ADCY3	NM_004036.3	3800050	ILMN_1676893	2	0.071	1.05044	0.533127	0.890445	-0.582	0.668037	2e-05	0.000471	-0.61	0.655197	1e-06	0.000229	-0.653	0.635957	0.001033	0.028561
ADCY4	NM_139247.2	6330224	ILMN_2148944	14	0.113	1.08147	0.115939	0.574171	0.129	1.09354	0.019051	0.108064	0.125	1.09051	0.022255	0.178412	0.017	1.01185	0.801745	0.964879
ADCY5	NM_183357.1	1030187	ILMN_1708588	3	-0.039	0.973329	0.494677	0.878295	-0.059	0.959929	0.320351	0.682405	-0.11	0.926588	0.079656	0.40072	-0.02	0.986233	0.685652	0.938361
ADCY6	NM_020983.2	2190463	ILMN_2311674	12	-0.087	0.941478	0.168674	0.650436	-0.094	0.936921	0.113521	0.395676	0.029	1.0203	0.593941	0.893876	-0.007	0.99516	0.88832	0.981512
ADCY6	NM_020983.2	3120600	ILMN_1685156	12	-0.101	0.932386	0.090514	0.526324	-0.155	0.898132	0.007781	0.052617	0.072	1.05117	0.377511	0.787944	-0.054	0.963262	0.315952	0.768695
ADCY7	NM_001114.3	50735	ILMN_1655935	16	-0.028	0.980779	0.697859	0.939617	0.042	1.02954	0.386876	0.739385	-0.049	0.966606	0.494084	0.852131	0.07	1.04972	0.34564	0.790039
ADCY8	NM_001115.1	5310431	ILMN_1754440	8	0.093	1.06659	0.124914	0.588648	0.062	1.04391	0.220421	0.574697	0.022	1.01537	0.650519	0.912947	-0.031	0.978742	0.561897	0.898102
ADCY9	NM_001116.2	3060100	ILMN_1654287	16	0.055	1.03886	0.383841	0.823227	0.117	1.08448	0.062711	0.267636	-0.168	0.890076	0.019567	0.162483	0.062	1.04391	0.257362	0.719703
ADCYAP1	NM_001117.3	3060064	ILMN_1763344	18	0.078	1.05555	0.104049	0.554133	0.062	1.04391	0.218787	0.572489	0.087	1.06216	0.095997	0.443366	-0.016	0.988971	0.693493	0.940297
ADCYAP1R1	NM_001118.3	7100020	ILMN_1711736	7	-0.012	0.991717	0.781461	0.95673	-0.001	0.999307	0.990096	0.99756	0.02	1.01396	0.704152	0.93157	0.011	1.00765	0.79226	0.962137
ADD1	NM_176801.1	5900685	ILMN_1759252	4	-0.246	0.843231	0.061531	0.452072	-0.622	0.64977	7e-06	0.000228	-0.485	0.714497	0.000202	0.006272	-0.376	0.770571	0.019483	0.192284
ADD1	NM_001119.3	1230289	ILMN_2356786	4	-0.121	0.91955	0.159706	0.638112	-0.214	0.862144	0.008889	0.058611	0.037	1.02598	0.739883	0.939863	-0.093	0.937571	0.356888	0.797431
ADD2	NM_017483.2	2630021	ILMN_2336146	2	0.013	1.00905	0.773065	0.954188	-0.056	0.961927	0.248366	0.608761	-0.094	0.936921	0.084809	0.414737	-0.069	0.953299	0.182447	0.635225
ADD2	NM_017488.2	6040601	ILMN_2286339	2	0.013	1.00905	0.802308	0.96211	0.005	1.00347	0.916513	0.979431	-0.073	0.950659	0.173499	0.588928	-0.008	0.99447	0.867067	0.977265
ADD2	NM_017483.2	6250193	ILMN_1694133	2	0.049	1.03455	0.411275	0.836625	-0.013	0.99103	0.814881	0.949517	-0.056	0.961927	0.340274	0.761659	-0.062	0.957935	0.177936	0.629725
ADD2	NM_017483.2	2600609	ILMN_1678791	2	-0.037	0.97468	0.524303	0.888085	0.021	1.01466	0.698641	0.909575	-0.033	0.977386	0.560669	0.882526	0.057	1.0403	0.316517	0.768957
ADD3	NM_019903.3	730747	ILMN_1678501	10	-0.037	0.97468	0.523333	0.887486	0.014	1.00975	0.837927	0.956828	-0.015	0.989657	0.787023	0.953241	0.051	1.03598	0.43359	0.840908
ADD3	NM_001121.2	3420747	ILMN_2311278	10	-0.216	0.860949	0.138535	0.610978	-0.257	0.836826	0.031917	0.162496	0.073	1.0519	0.531928	0.870186	-0.041	0.971981	0.658945	0.93102
ADD3	NM_016824.3	1010477	ILMN_1787378	10	-0.27	0.82932	0.099363	0.54387	-0.162	0.893785	0.182488	0.520006	0.149	1.1088	0.221918	0.65115	0.108	1.07773	0.25403	0.716608
ADD3	NM_001121.2	1990468	ILMN_1814526	10	-0.498	0.708088	0.001185	0.05765	-0.505	0.70466	3.6e-05	0.000731	0.399	1.31859	0.000299	0.008218	-0.007	0.99516	0.9465	0.991045
ADH1A	NM_000667.2	3370347	ILMN_1764309	4	0.035	1.02456	0.529512	0.889786	0.034	1.02385	0.588248	0.861187	0.022	1.01537	0.708136	0.931838	-0.001	0.999307	0.989508	0.998661
ADH1B	NM_000668.3	2490612	ILMN_1811598	4	-0.034	0.976709	0.470141	0.866944	-0.053	0.96393	0.347699	0.706484	-0.003	0.997923	0.947093	0.989621	-0.018	0.987601	0.706209	0.943527
ADH1C	NM_000669.3	1510750	ILMN_1740717	4	-0.029	0.980099	0.588058	0.910992	-0.013	0.99103	0.806698	0.947256	-0.021	0.985549	0.666984	0.9176	0.016	1.01115	0.786398	0.960834
ADH4	NM_000670.3	7550632	ILMN_1797912	4	-0.009	0.993781	0.896687	0.981041	-0.001	0.999307	0.987307	0.99647	-0.019	0.986917	0.751643	0.943849	0.008	1.00556	0.904851	0.984922
ADH4	NM_000670.3	5490382	ILMN_2136010	4	0.006	1.00417	0.910196	0.984019	-0.047	0.967947	0.387759	0.739768	0.022	1.01537	0.692509	0.92766	-0.053	0.96393	0.321534	0.772571
ADH5	NM_000671.3	5720161	ILMN_1738604	4	0.043	1.03025	0.561785	0.901557	-0.131	0.913198	0.129113	0.428576	-0.191	0.875998	0.101951	0.458526	-0.174	0.886382	0.074477	0.422771
ADH6	NM_000672.2	3800368	ILMN_1691175	4	-0.056	0.961927	0.190801	0.677808	0.034	1.02385	0.530366	0.832423	-0.047	0.967947	0.378015	0.788308	0.09	1.06437	0.122711	0.537369
ADH7	NM_000673.3	3520709	ILMN_2223359	4	0.03	1.02101	0.53958	0.892504	0.057	1.0403	0.282531	0.644797	0.037	1.02598	0.49751	0.853102	0.027	1.01889	0.568226	0.90095
ADHFE1	NM_001077593.1	3890598	ILMN_2363634		-0.007	0.99516	0.883614	0.978488	-0.012	0.991717	0.82411	0.952366	-0.051	0.965267	0.346625	0.765944	-0.004	0.997231	0.938873	0.990163
ADHFE1	NM_144650.2	2760121	ILMN_1702858	8	-0.012	0.991717	0.816471	0.966148	0.042	1.02954	0.474199	0.798246	0.124	1.08975	0.044333	0.282087	0.054	1.03814	0.383024	0.81263
ADI1	NM_018269.1	6620278	ILMN_1813975	2	-0.392	0.762072	0.001621	0.068649	-0.003	0.997923	0.954702	0.989151	0.392	1.31221	1.1e-05	0.000922	0.389	1.30949	0.001937	0.042514
ADIG	NM_001018082.1	3800722	ILMN_1743331	20	0.059	1.04174	0.226122	0.713857	0.063	1.04464	0.23863	0.596709	0.031	1.02172	0.500364	0.854415	0.004	1.00278	0.943712	0.990427
ADIPOQ	NM_004797.2	4200471	ILMN_1775045	3	0.063	1.04464	0.175432	0.659358	0.062	1.04391	0.28994	0.65177	0.089	1.06363	0.114981	0.48868	-0.001	0.999307	0.992138	0.998848
ADIPOR1	NM_015999.2	3460201	ILMN_2096322	1	-0.045	0.96929	0.632523	0.923641	0.554	1.46815	2e-06	0.000102	0.432	1.3491	0.003354	0.046064	0.598	1.51362	0.000133	0.008079
ADIPOR1	NM_015999.2	6100767	ILMN_1688322	1	-0.438	0.738157	0.03064	0.330993	-0.139	0.908148	0.12207	0.413584	0.473	1.38799	0.000143	0.004925	0.299	1.23029	0.123941	0.540405
ADIPOR2	NM_024551.2	6960685	ILMN_2224833	12	-0.217	0.860353	0.142562	0.617275	-0.428	0.743291	0.000991	0.009922	-0.314	0.804408	0.016318	0.143675	-0.211	0.863938	0.167374	0.617002
ADK	NM_001123.2	7100414	ILMN_2358628	10	-0.04	0.972655	0.329657	0.788843	-0.093	0.937571	0.067342	0.281209	-0.056	0.961927	0.24156	0.671912	-0.053	0.96393	0.242145	0.70446
ADK	NM_006721.2	3130450	ILMN_1768062	10	0.003	1.00208	0.966205	0.993874	0.15	1.10957	0.040551	0.194857	-0.034	0.976709	0.647349	0.912182	0.147	1.10726	0.068625	0.406758
ADK	NM_001123.2	7550161	ILMN_1801020	10	0.093	1.06659	0.336102	0.792458	0.318	1.2466	0.000323	0.003982	0.282	1.21588	0.001521	0.026201	0.224	1.16797	0.026068	0.228807
ADK	NM_001123.2	1030241	ILMN_2358626	10	0.019	1.01326	0.873131	0.977277	0.153	1.11188	0.062209	0.266334	0.44	1.3566	0.000142	0.004915	0.134	1.09733	0.338136	0.784837
ADM	NM_001124.1	5670465	ILMN_1708934	11	-0.14	0.907519	0.555029	0.899165	0.311	1.24057	0.038345	0.186897	0.302	1.23285	0.052976	0.315432	0.451	1.36699	0.04264	0.310755
ADM2	NM_024866.4	3610626	ILMN_1702933	22	0.185	1.13682	0.055829	0.43673	0.151	1.11034	0.017009	0.098327	0.049	1.03455	0.478738	0.844646	-0.034	0.976709	0.708074	0.943942
ADNP	NM_181442.1	360678	ILMN_1657993	20	-0.076	0.948684	0.395153	0.82828	-0.499	0.707597	3.6e-05	0.000736	-0.358	0.780245	0.000127	0.004586	-0.423	0.745872	0.003415	0.061471
ADNP	NM_015339.2	1770551	ILMN_1666019	20	0.076	1.05409	0.246244	0.730364	-0.028	0.980779	0.551527	0.842963	-0.03	0.97942	0.604293	0.897932	-0.103	0.931095	0.113248	0.518539
ADNP2	NM_014913.2	7330270	ILMN_2080751	18	-0.045	0.96929	0.660011	0.92982	-0.332	0.794434	0.004744	0.035099	-0.276	0.825878	0.002356	0.035736	-0.286	0.820173	0.052099	0.348567
ADO	NM_032804.5	4480546	ILMN_1690352	10	-0.017	0.988286	0.754642	0.951835	0.266	1.20247	0.000612	0.006689	0.461	1.3765	1.5e-05	0.001181	0.283	1.21672	0.000997	0.027987
ADORA1	NM_000674.2	3830148	ILMN_2373444	1	0.094	1.06733	0.128278	0.595018	0.056	1.03958	0.332752	0.693955	0.001	1.00069	0.988582	0.997849	-0.039	0.973329	0.460802	0.852942
ADORA1	NM_000674.1	4060519	ILMN_1747227	1	0.025	1.01748	0.741849	0.949097	0.103	1.074	0.086004	0.331353	0.027	1.01889	0.71277	0.933517	0.078	1.05555	0.310018	0.763691
ADORA1	NM_000674.2	2100110	ILMN_2275396	1	-0.011	0.992404	0.830079	0.969232	-0.011	0.992404	0.843778	0.958365	0.047	1.03311	0.403418	0.803344	0.001	1.00069	0.988972	0.998661
ADORA2A	NM_000675.3	7560440	ILMN_1807372	22	-0.045	0.96929	0.50599	0.881269	0.041	1.02883	0.455024	0.787051	0.152	1.11111	0.026829	0.203236	0.085	1.06069	0.188754	0.643592
ADORA2B	NM_000676.2	2060040	ILMN_1703946	17	0	1	0.994471	0.999198	0.495	1.40932	6.9e-05	0.001201	0.55	1.46409	2e-05	0.001376	0.495	1.40932	0.000148	0.008749
ADORA3	NM_000677.3	6580482	ILMN_1730710	1	-0.042	0.971307	0.296594	0.768173	-0.044	0.969962	0.343849	0.703236	-0.056	0.961927	0.384742	0.791605	-0.002	0.998615	0.958652	0.993424
ADORA3	NM_001081976.1	870138	ILMN_1733259	1	0.089	1.06363	0.115841	0.574033	0.081	1.05775	0.094173	0.352008	0.129	1.09354	0.033483	0.236237	-0.008	0.99447	0.879813	0.979484
ADPGK	NM_031284.3	5550619	ILMN_1793959	15	0.016	1.01115	0.830292	0.969232	-0.011	0.992404	0.897969	0.97311	-0.116	0.922742	0.138105	0.532607	-0.027	0.981459	0.734761	0.950749
ADPRH	NM_001125.2	5550369	ILMN_1794512	3	0.061	1.04319	0.185026	0.672312	0.058	1.04102	0.269635	0.631208	0.083	1.05922	0.1192	0.49697	-0.003	0.997923	0.948186	0.991337
ADPRHL1	NM_199162.1	3390735	ILMN_1760335	13	0.301	1.232	0.107114	0.559127	0.43	1.34723	0.001442	0.013418	0.016	1.01115	0.854146	0.969383	0.129	1.09354	0.431291	0.839409
ADPRHL1	NM_138430.3	1990070	ILMN_1795788	13	-0.04	0.972655	0.397169	0.829245	-0.028	0.980779	0.535303	0.834435	0.022	1.01537	0.681427	0.923154	0.012	1.00835	0.792782	0.962296
ADPRHL1	NM_138430.3	5570446	ILMN_1788530	13	-0.118	0.921464	0.251363	0.733416	-0.224	0.856188	0.006183	0.04374	0.113	1.08147	0.258599	0.690431	-0.106	0.929161	0.306569	0.76116
ADPRHL2	NM_017825.1	730010	ILMN_1811480	1	0.17	1.12506	0.531708	0.890062	0.432	1.3491	0.009967	0.064234	-0.025	0.982821	0.866946	0.972359	0.261	1.19831	0.264366	0.725865
ADRA1A	NM_033303.3	4590215	ILMN_1709167	8	-0.102	0.93174	0.067356	0.469773	-0.16	0.895025	0.010287	0.065961	-0.107	0.928517	0.070281	0.37316	-0.058	0.960595	0.193129	0.649171
ADRA1A	NM_033302.1	1070315	ILMN_1653821	8	-0.013	0.99103	0.802027	0.961973	-0.089	0.940174	0.132555	0.435044	-0.098	0.934327	0.140477	0.536157	-0.076	0.948684	0.118744	0.5291
ADRA1A	NM_000680.2	1110731	ILMN_1780551	8	-0.088	0.940826	0.220019	0.707902	0.084	1.05995	0.182454	0.519992	0.012	1.00835	0.84331	0.967123	0.172	1.12662	0.014176	0.156834
ADRA1A	NM_033302.2	780670	ILMN_1813598	8	0.049	1.03455	0.316696	0.782197	0.064	1.04536	0.256091	0.617615	0.025	1.01748	0.613364	0.901262	0.016	1.01115	0.780722	0.959707
ADRA1A	NM_033304.1	2690500	ILMN_1669227	8	0.018	1.01255	0.72196	0.944877	0.052	1.0367	0.436182	0.773481	0.026	1.01819	0.640698	0.909532	0.034	1.02385	0.581637	0.906119
ADRA1B	NM_000679.3	2140022	ILMN_1679754	5	0.04	1.02811	0.554898	0.899165	0.099	1.07103	0.123973	0.417491	0.026	1.01819	0.674073	0.920292	0.059	1.04174	0.268203	0.729507
ADRA1D	NM_000678.3	1340630	ILMN_1716421	20	-0.018	0.987601	0.725676	0.946309	0.023	1.01607	0.660015	0.892472	0.049	1.03455	0.491891	0.851443	0.041	1.02883	0.350621	0.793113
ADRA2A	NM_000681.2	5720523	ILMN_1659371	10	0.043	1.03025	0.432927	0.849885	0.114	1.08222	0.040194	0.193715	0.093	1.06659	0.174801	0.590508	0.071	1.05044	0.245633	0.708647
ADRA2B	NM_000682.5	3390286	ILMN_1677868	2	0.076	1.05409	0.150509	0.627735	0.027	1.01889	0.583759	0.858881	0.045	1.03168	0.510308	0.859073	-0.049	0.966606	0.356308	0.796929
ADRA2C	XM_001128592.1	870474	ILMN_1707445		0.057	1.0403	0.410071	0.835975	0.026	1.01819	0.62854	0.879549	-0.006	0.99585	0.895135	0.978917	-0.032	0.978063	0.662633	0.931697
ADRA2C	XM_001128592.1	3460672	ILMN_1733963		0.032	1.02243	0.609797	0.917091	0.014	1.00975	0.763889	0.933162	0.047	1.03311	0.344258	0.764285	-0.018	0.987601	0.78392	0.960195
ADRB1	NM_000684.2	7050440	ILMN_1804255	10	-0.025	0.982821	0.586346	0.910405	0.02	1.01396	0.680355	0.901524	-0.035	0.976032	0.508295	0.857776	0.045	1.03168	0.345381	0.789764
ADRB2	NM_000024.4	7570326	ILMN_1695590	5	-0.054	0.963262	0.240893	0.726103	0.205	1.15269	0.003588	0.027881	0.438	1.35472	4e-06	0.000438	0.259	1.19665	0.002348	0.048067
ADRB3	NM_000025.1	1430722	ILMN_1694007	8	-0.019	0.986917	0.727418	0.94686	0.005	1.00347	0.926768	0.982109	-0.063	0.957271	0.274962	0.70685	0.024	1.01677	0.662773	0.931697
ADRBK1	NM_001619.3	3290113	ILMN_3307926	11	0.127	1.09202	0.464773	0.864968	0.109	1.07848	0.434055	0.771932	-0.131	0.913198	0.437224	0.822107	-0.018	0.987601	0.836533	0.972106
ADRBK1	NM_001619.2	5700181	ILMN_1673330	11	-0.047	0.967947	0.412309	0.837228	0.007	1.00486	0.89437	0.972245	-0.068	0.95396	0.16703	0.579399	0.055	1.03886	0.407503	0.826136
ADRBK2	NM_005160.3	2120528	ILMN_1668900	22	-0.097	0.934975	0.217772	0.705586	-0.092	0.938221	0.222369	0.577284	-0.073	0.950659	0.332598	0.756121	0.005	1.00347	0.917201	0.98706
ADRM1	NM_175573.1	4390121	ILMN_1760143	20	-0.134	0.911301	0.332692	0.790832	0.33	1.25701	0.006966	0.04816	0.42	1.33793	0.003182	0.044329	0.464	1.37936	0.001079	0.029195
ADRM1	NM_175573.1	4280136	ILMN_2389013	20	-0.284	0.821311	0.061201	0.451052	0.097	1.06955	0.17939	0.515457	0.693	1.61664	1.9e-05	0.001336	0.38	1.30134	0.016443	0.172094
ADSL	NM_000026.1	5870228	ILMN_1790757	22	0.627	1.54435	0.002173	0.080726	0.011	1.00765	0.877949	0.967762	-0.423	0.745872	5e-05	0.002467	-0.616	0.652477	0.003254	0.059363
ADSS	NM_001126.2	6020333	ILMN_1778796	1	-0.245	0.843816	0.241862	0.727032	-0.522	0.696406	2.6e-05	0.000572	-0.224	0.856188	0.014017	0.129721	-0.277	0.825305	0.175541	0.626651
ADSS	NM_001126.2	5960097	ILMN_2092664	1	-0.034	0.976709	0.692324	0.938769	-0.582	0.668037	2.8e-05	0.000608	-0.585	0.666649	2e-05	0.001373	-0.548	0.683968	7.8e-05	0.005825
ADSSL1	NM_152328.3	4830372	ILMN_1720235	14	-0.325	0.798298	0.003149	0.099108	-0.687	0.621144	5e-06	0.000159	-0.075	0.949342	0.416577	0.810692	-0.362	0.778085	0.000228	0.011071
ADSSL1	NM_152328.3	4900703	ILMN_2240009	14	0.003	1.00208	0.955457	0.992272	-0.083	0.944092	0.091925	0.346379	-0.043	0.970634	0.337698	0.759199	-0.085	0.942785	0.109377	0.510217
ADSSL1	NM_199165.1	1660446	ILMN_1749804	14	0.014	1.00975	0.764849	0.953501	0.05	1.03526	0.358863	0.716296	0.012	1.00835	0.78705	0.953242	0.037	1.02598	0.52455	0.883102
AEBP1	NM_001129.3	6580711	ILMN_1736178	7	-0.035	0.976032	0.634465	0.924252	-0.087	0.941478	0.201007	0.547926	-0.038	0.974004	0.573808	0.886794	-0.053	0.96393	0.260265	0.721682
AEBP2	NM_153207.3	4260671	ILMN_1803376	12	0.051	1.03598	0.428529	0.847243	-0.268	0.83047	0.003353	0.026512	-0.239	0.847332	0.005931	0.070183	-0.318	0.802181	0.001477	0.035545
AEN	NM_022767.3	5090438	ILMN_3240321	15	0.2	1.1487	0.008262	0.168928	0.637	1.55509	3e-06	0.000115	0.843	1.79378	2.4e-05	0.001554	0.436	1.35285	0.000147	0.008715
AES	NM_198969.1	6660491	ILMN_1707958	19	0.04	1.02811	0.547563	0.895468	0.01	1.00696	0.860831	0.963393	0.077	1.05482	0.242634	0.672685	-0.03	0.97942	0.579732	0.905232
AES	NM_198970.1	6180176	ILMN_2333107	19	-0.768	0.587231	0.003251	0.100445	-0.726	0.604578	3e-06	0.000112	0.24	1.18099	0.061415	0.343796	0.042	1.02954	0.816503	0.967795
AES	NM_001130.5	1230458	ILMN_1712944	19	-0.553	0.681601	0.023296	0.290754	-0.373	0.772175	0.000633	0.006881	0.315	1.24401	0.001441	0.025287	0.18	1.13288	0.39813	0.820843
AFAP1	NM_198595.2	2690187	ILMN_1701998	4	0.253	1.19168	0.011142	0.19774	0.078	1.05555	0.291171	0.653234	-0.134	0.911301	0.131444	0.519496	-0.175	0.885768	0.026527	0.231497
AFAP1	NM_198595.2	3130458	ILMN_1651235	4	0.052	1.0367	0.425464	0.845708	-0.032	0.978063	0.556217	0.845634	-0.012	0.991717	0.822334	0.961985	-0.084	0.943438	0.168345	0.618185
AFAP1	NM_021638.4	2190681	ILMN_1660424	4	0.056	1.03958	0.294768	0.766569	0.036	1.02527	0.466719	0.793544	0.077	1.05482	0.149191	0.549682	-0.02	0.986233	0.731345	0.949744
AFAP1L1	NM_152406.1	20154	ILMN_1694140	5	-0.195	0.873573	0.005311	0.132727	-0.189	0.877214	0.002163	0.018686	-0.129	0.914465	0.085011	0.415208	0.006	1.00417	0.907726	0.985043
AFAP1L2	NM_032550.2	6620711	ILMN_2404917	10	0.062	1.04391	0.218949	0.706842	0.064	1.04536	0.211794	0.562801	-0.066	0.955283	0.221792	0.651022	0.002	1.00139	0.958638	0.993424
AFAP1L2	NM_001001936.1	4590133	ILMN_1730995	10	0.387	1.30767	0.000298	0.027146	0.192	1.14235	0.003302	0.026196	0.135	1.09809	0.01995	0.164942	-0.196	0.872968	0.014981	0.162034
AFAR3	NM_201252.1	5270195	ILMN_1702696	1	-0.029	0.980099	0.479948	0.871138	-0.036	0.975355	0.477401	0.800117	-0.003	0.997923	0.956882	0.991829	-0.007	0.99516	0.891344	0.981809
AFARP1	NR_002796.1	1690086	ILMN_1769563	1	-0.044	0.969962	0.362466	0.809283	0.007	1.00486	0.9009	0.974288	0.012	1.00835	0.849842	0.968514	0.051	1.03598	0.392103	0.817759
AFARP1	NR_002796.1	1110687	ILMN_2084562	1	0.017	1.01185	0.791153	0.958711	0.011	1.00765	0.811544	0.948776	0.066	1.04681	0.176952	0.593873	-0.006	0.99585	0.924402	0.988259
AFF1	NM_005935.1	6060142	ILMN_2129015	4	-0.278	0.824734	0.000835	0.047097	-0.294	0.815637	0.001422	0.013281	0.047	1.03311	0.448206	0.828464	-0.016	0.988971	0.836839	0.972109
AFF1	NM_005935.1	3990673	ILMN_1673119	4	-0.039	0.973329	0.450852	0.859586	-0.016	0.988971	0.709604	0.913388	0.076	1.05409	0.257729	0.689654	0.023	1.01607	0.650373	0.928811
AFF2	NM_002025.2	3890088	ILMN_1725889	X	0.024	1.01677	0.665464	0.931467	-0.062	0.957935	0.341123	0.701295	-0.126	0.916369	0.046706	0.29149	-0.086	0.942131	0.162868	0.61021
AFF3	NM_001025108.1	650753	ILMN_1775235	2	-0.069	0.953299	0.154039	0.631325	-0.028	0.980779	0.579717	0.85703	-0.076	0.948684	0.129818	0.51617	0.041	1.02883	0.419974	0.833972
AFF3	NM_001025108.1	2230273	ILMN_1677951	2	-0.058	0.960595	0.310487	0.777714	-0.085	0.942785	0.15194	0.471529	-0.064	0.956608	0.290592	0.721456	-0.027	0.981459	0.613151	0.916292
AFF4	NM_014423.3	2360189	ILMN_1708502	5	-0.112	0.925304	0.149858	0.627115	0.017	1.01185	0.801325	0.94555	-0.006	0.99585	0.930332	0.986785	0.129	1.09354	0.160278	0.605821
AFG3L1	NM_001031805.1	60609	ILMN_1705447	16	0.039	1.0274	0.66151	0.92982	-0.038	0.974004	0.431731	0.770236	-0.134	0.911301	0.035481	0.245219	-0.077	0.948027	0.375557	0.808761
AFG3L1	NR_003226.1	730730	ILMN_1699172	16	-0.019	0.986917	0.685529	0.937296	-0.081	0.945402	0.128312	0.426785	-0.117	0.922103	0.043131	0.277011	-0.061	0.958599	0.165911	0.61431
AFG3L1	NR_003228.1	3180403	ILMN_2409898	16	0.036	1.02527	0.409521	0.83592	-0.051	0.965267	0.301192	0.663869	0.022	1.01537	0.650689	0.913029	-0.087	0.941478	0.066395	0.398993
AFG3L1	NR_003228.1	5670274	ILMN_2295698	16	0.124	1.08975	0.02314	0.289832	0.098	1.07029	0.083749	0.325502	0.102	1.07326	0.110548	0.478744	-0.027	0.981459	0.612528	0.915937
AFG3L2	NM_006796.1	1170538	ILMN_2066124	18	0.322	1.25006	0.033841	0.34713	0.038	1.02669	0.733318	0.922802	-0.338	0.791137	0.011808	0.114185	-0.285	0.820742	0.005808	0.086579
AFM	NM_001133.2	3120681	ILMN_1777797	4	-0.082	0.944747	0.114682	0.572184	-0.13	0.913831	0.023631	0.128305	-0.082	0.944747	0.193639	0.614848	-0.049	0.966606	0.313951	0.767209
AFMID	NM_001010982.1	2000497	ILMN_2095653	17	0.168	1.1235	0.08728	0.519377	-0.119	0.920826	0.155297	0.47654	0.043	1.03025	0.552857	0.8787	-0.287	0.819605	0.00992	0.123825
AFMID	NM_001010982.2	2070707	ILMN_1707551	17	-0.007	0.99516	0.950599	0.991686	0.471	1.38607	0.000149	0.002163	0.141	1.10267	0.262206	0.695122	0.478	1.39281	0.004207	0.070559
AFP	NM_001134.1	2030161	ILMN_1782204	4	-0.072	0.951318	0.175432	0.659358	-0.04	0.972655	0.420908	0.763577	-0.064	0.956608	0.197287	0.619506	0.032	1.02243	0.540206	0.889277
AFTPH	NM_203437.2	5570543	ILMN_2342841	2	-0.2	0.870551	0.00278	0.09278	-0.265	0.832199	0.000386	0.004572	-0.192	0.875391	0.006362	0.073567	-0.065	0.955945	0.225556	0.685443
AFTPH	NM_017657.3	450097	ILMN_2402766	2	-0.113	0.924663	0.520546	0.886593	-0.441	0.736624	0.007633	0.051823	-0.159	0.895646	0.273173	0.705542	-0.328	0.79664	0.009018	0.116277
AFTPH	NM_203437.2	2070600	ILMN_1767722	2	0.016	1.01115	0.751436	0.951142	-0.012	0.991717	0.798971	0.944578	0.026	1.01819	0.58375	0.890448	-0.028	0.980779	0.575402	0.903761
AGA	NM_000027.2	130064	ILMN_1802631	4	-0.025	0.982821	0.655746	0.929454	-0.261	0.834509	0.000226	0.003001	-0.154	0.898755	0.023149	0.18335	-0.236	0.849096	0.002333	0.047912
AGAP1	NM_001037131.1	2340563	ILMN_2318481	2	0.012	1.00835	0.761826	0.952844	-0.005	0.99654	0.927039	0.982109	-0.054	0.963262	0.237702	0.668402	-0.017	0.988286	0.747304	0.954064
AGAP1	NM_001037131.1	7400333	ILMN_2245223	2	0.003	1.00208	0.949123	0.99126	0.002	1.00139	0.969773	0.991854	0.027	1.01889	0.57147	0.886161	-0.001	0.999307	0.984747	0.997984
AGAP11	NM_133447.1	5290364	ILMN_3238543	10	0.089	1.06363	0.119966	0.581133	0.048	1.03383	0.375184	0.729429	0.084	1.05995	0.246	0.676642	-0.041	0.971981	0.356104	0.796814
AGAP2	NM_014770.2	3140608	ILMN_1735591	12	-0.002	0.998615	0.971426	0.995047	-0.041	0.971981	0.520139	0.826563	-0.002	0.998615	0.980445	0.995963	-0.04	0.972655	0.575714	0.90384
AGAP3	NM_001042535.1	3890431	ILMN_2269136	7	0.229	1.17202	0.188766	0.676526	0.406	1.32501	0.003433	0.026983	0.003	1.00208	0.975865	0.995111	0.177	1.13053	0.264901	0.726573
AGAP3	NM_001042535.1	1510615	ILMN_2362126	7	0.014	1.00975	0.819324	0.966863	0.154	1.11265	0.010379	0.066406	0.197	1.14631	0.006656	0.076152	0.14	1.10191	0.060671	0.378304
AGAP6	NM_001077665.2	6960050	ILMN_3239130	10	0.02	1.01396	0.632465	0.923641	-0.065	0.955945	0.19723	0.542151	0.069	1.04899	0.315097	0.741696	-0.085	0.942785	0.105316	0.502094
AGAP7	NM_001077685.1	4390523	ILMN_2120103	10	0.025	1.01748	0.537337	0.891864	0.034	1.02385	0.507687	0.818726	-0.019	0.986917	0.668089	0.917938	0.009	1.00626	0.857248	0.975298
AGAP8	NM_001077686.1	2140343	ILMN_3242883	10	0.019	1.01326	0.678314	0.935214	-0.078	0.94737	0.176759	0.511665	0.006	1.00417	0.9117	0.982044	-0.097	0.934975	0.09173	0.470641
AGBL1	NM_152336.2	990220	ILMN_2100055	15	-0.019	0.986917	0.680348	0.935849	0.057	1.0403	0.364701	0.72108	-0.037	0.97468	0.442256	0.825269	0.077	1.05482	0.278156	0.738442
AGBL1	NM_152336.2	5340681	ILMN_1887648	15	0.074	1.05263	0.273652	0.751666	-0.037	0.97468	0.525374	0.82922	-0.025	0.982821	0.692269	0.927543	-0.111	0.925946	0.0483	0.333361
AGBL2	NM_024783.2	4890338	ILMN_1688627	11	-0.024	0.983502	0.580166	0.90821	-0.034	0.976709	0.460529	0.790124	-0.007	0.99516	0.891098	0.977634	-0.01	0.993092	0.810595	0.966668
AGBL3	NM_178563.1	2350059	ILMN_1672767	7	0.071	1.05044	0.151018	0.628466	0.064	1.04536	0.293038	0.655092	-0.014	0.990343	0.789464	0.954283	-0.008	0.99447	0.905857	0.984922
AGBL4	NM_032785.1	520379	ILMN_2196642	1	-0.025	0.982821	0.562912	0.901987	-0.054	0.963262	0.281074	0.643116	-0.032	0.978063	0.502193	0.854949	-0.029	0.980099	0.561043	0.897867
AGBL5	NM_021831.5	6620403	ILMN_2290776	2	0.014	1.00975	0.819626	0.966902	-0.211	0.863938	0.001854	0.01645	-0.043	0.970634	0.449157	0.829235	-0.225	0.855595	0.003762	0.065818
AGBL5	NM_001035507.2	1850075	ILMN_2308689	2	0.427	1.34443	0.007031	0.154818	0.397	1.31677	0.000315	0.003889	0.139	1.10114	0.041116	0.268994	-0.03	0.97942	0.802688	0.965015
AGC1	NM_001135.1	4480747	ILMN_1777182	15	0.031	1.02172	0.569379	0.904658	0.085	1.06069	0.105378	0.378714	0.026	1.01819	0.651607	0.913144	0.055	1.03886	0.270899	0.732787
AGER	NM_001136.3	6620523	ILMN_1690829	6	-0.005	0.99654	0.910881	0.984066	0.042	1.02954	0.409945	0.756679	-0.04	0.972655	0.45686	0.832587	0.047	1.03311	0.328535	0.778869
AGER	NM_001136.3	7200369	ILMN_2257015	6	-0.102	0.93174	0.081366	0.505841	-0.115	0.923382	0.036922	0.181688	-0.019	0.986917	0.706141	0.931651	-0.013	0.99103	0.788304	0.961075
AGER	NM_001136.3	1940465	ILMN_1729777	6	-0.074	0.95	0.184799	0.671969	-0.072	0.951318	0.157441	0.480003	0.015	1.01045	0.799909	0.957739	0.002	1.00139	0.966753	0.994331
AGFG1	NM_001135189.1	4280681	ILMN_3260345	2	-0.149	0.901875	0.007873	0.16479	-0.252	0.839731	0.000235	0.003088	-0.24	0.846745	0.000627	0.014	-0.103	0.931095	0.035221	0.277648
AGFG1	NM_004504.4	990754	ILMN_3181215	2	-0.103	0.931095	0.048402	0.410069	-0.129	0.914465	0.018326	0.104619	-0.035	0.976032	0.46526	0.837805	-0.026	0.98214	0.604021	0.913609
AGFG2	NM_006076.4	4050368	ILMN_1703228	7	-0.097	0.934975	0.142561	0.617275	-0.112	0.925304	0.085103	0.328872	-0.061	0.958599	0.268368	0.701122	-0.014	0.990343	0.820212	0.968645
AGFG2	NM_006076.4	5550538	ILMN_1652023	7	0.055	1.03886	0.27139	0.749367	0.114	1.08222	0.106877	0.381941	0.132	1.09581	0.034166	0.239494	0.06	1.04247	0.430272	0.839005
AGGF1	NM_018046.3	5130102	ILMN_1776153	5	-0.095	0.936272	0.04658	0.402512	-0.079	0.946714	0.14113	0.452342	-0.109	0.927231	0.049346	0.302232	0.016	1.01115	0.742899	0.952534
AGGF1	NM_018046.3	70239	ILMN_2064917	5	-0.066	0.955283	0.580429	0.908286	-0.67	0.628507	1e-06	7.3e-05	-0.675	0.626332	5e-06	0.000527	-0.604	0.657927	0.001337	0.033631
AGK	NM_018238.2	7560452	ILMN_1772645	7	0.105	1.07549	0.282992	0.758752	-0.491	0.711532	0.000121	0.001832	-0.458	0.727995	0.000586	0.013338	-0.596	0.661586	0.000167	0.0094
AGL	NM_000645.2	2940113	ILMN_2371825	1	-0.944	0.51979	0.000678	0.042762	-1.15	0.450625	0	1.9e-05	-0.385	0.765779	0.000416	0.01042	-0.206	0.866938	0.246728	0.71016
AGL	NM_000642.2	7000672	ILMN_1664006	1	-0.467	0.723467	0.001348	0.061726	-0.496	0.70907	0.000288	0.003615	-0.298	0.813379	0.005792	0.068924	-0.029	0.980099	0.728979	0.949092
AGL	NM_000646.1	1440653	ILMN_1775082	1	-0.028	0.980779	0.565571	0.903367	-0.049	0.966606	0.452402	0.78541	-0.072	0.951318	0.214923	0.642251	-0.021	0.985549	0.745113	0.953162
AGL	NM_000645.2	5270041	ILMN_2274377	1	0.041	1.02883	0.425871	0.845766	-0.024	0.983502	0.672794	0.898279	-0.028	0.980779	0.588567	0.892002	-0.065	0.955945	0.231927	0.692528
AGL	NM_000028.2	3190468	ILMN_1717468	1	-0.022	0.984866	0.681964	0.936117	0.05	1.03526	0.362257	0.719479	-0.023	0.984184	0.700571	0.930694	0.073	1.0519	0.233963	0.694965
AGL	NM_000642.2	1440661	ILMN_1680343	1	0.006	1.00417	0.89664	0.981041	0.02	1.01396	0.656754	0.891693	-0.009	0.993781	0.846954	0.967986	0.014	1.00975	0.742442	0.952534
AGL	NM_000645.1	6110050	ILMN_1750235	1	-0.006	0.99585	0.880077	0.977827	-0.015	0.989657	0.746975	0.927062	-0.005	0.99654	0.929432	0.986544	-0.009	0.993781	0.839016	0.972109
AGL	NM_000646.2	2060255	ILMN_2277492	1	0.014	1.00975	0.809134	0.963831	0.048	1.03383	0.370584	0.725345	0.083	1.05922	0.191178	0.61265	0.035	1.02456	0.454072	0.850133
AGMAT	NM_024758.3	4890255	ILMN_1707169	1	0.046	1.0324	0.350302	0.801461	0.042	1.02954	0.390433	0.741955	-0.014	0.990343	0.779958	0.950912	-0.004	0.997231	0.924937	0.988259
AGPAT1	NM_006411.2	4610044	ILMN_1679520	6	-0.559	0.678772	0.005183	0.130949	-0.902	0.535144	0	1.7e-05	-0.216	0.860949	0.011717	0.113566	-0.344	0.787854	0.049673	0.338803
AGPAT1	NM_006411.2	990369	ILMN_1697790	6	-0.059	0.959929	0.361268	0.808482	-0.052	0.964598	0.465199	0.793106	-0.089	0.940174	0.132392	0.521476	0.007	1.00486	0.927551	0.988714
AGPAT1	NM_032741.3	630437	ILMN_1779109	6	0.024	1.01677	0.706571	0.94122	0.029	1.0203	0.617675	0.874591	0.054	1.03814	0.405681	0.805077	0.005	1.00347	0.925401	0.988281
AGPAT2	NM_001012727.1	5560102	ILMN_2377430	9	-0.11	0.926588	0.293058	0.765109	0.047	1.03311	0.599039	0.866077	0.063	1.04464	0.50816	0.857764	0.156	1.11419	0.009251	0.118427
AGPAT2	NM_006412.3	3850370	ILMN_1681081	9	-0.252	0.839731	0.018738	0.261181	0.079	1.05629	0.32193	0.683429	0.108	1.07773	0.099215	0.450965	0.331	1.25788	0.014459	0.15849
AGPAT2	NM_006412.3	3520671	ILMN_1732176	9	-0.262	0.833931	0.016814	0.246588	0.017	1.01185	0.824198	0.952421	0.115	1.08298	0.213297	0.639946	0.279	1.21335	0.017703	0.18015
AGPAT3	NM_001037553.1	620064	ILMN_1661373	21	0.004	1.00278	0.961256	0.993164	-0.114	0.924023	0.023003	0.125558	-0.112	0.925304	0.042082	0.272824	-0.118	0.921464	0.171946	0.622325
AGPAT3	NM_020132.4	2120204	ILMN_2288175	21	0.059	1.04174	0.303416	0.773293	0.032	1.02243	0.487973	0.806746	0.091	1.06511	0.066295	0.360537	-0.027	0.981459	0.641453	0.925687
AGPAT3	NM_020132.3	3850435	ILMN_1654010	21	0	1	0.991172	0.998332	-0.051	0.965267	0.311412	0.674431	0.102	1.07326	0.118504	0.495464	-0.052	0.964598	0.317584	0.769819
AGPAT4	NM_020133.2	3440025	ILMN_1730504	6	-0.095	0.936272	0.090881	0.526876	-0.079	0.946714	0.106871	0.381941	-0.064	0.956608	0.208055	0.632169	0.016	1.01115	0.749084	0.954064
AGPAT4	NM_001012733.1	1440364	ILMN_1732672	6	-0.054	0.963262	0.350927	0.801599	0.028	1.0196	0.596151	0.864903	0.004	1.00278	0.935271	0.987627	0.082	1.05848	0.13968	0.570992
AGPAT5	NM_018361.2	830719	ILMN_1662049	8	0.194	1.14393	0.09842	0.541841	-0.236	0.849096	0.025213	0.134945	-0.079	0.946714	0.333078	0.756454	-0.43	0.742262	0.002554	0.050662
AGPAT6	NM_178819.2	3870022	ILMN_1740752	8	-0.026	0.98214	0.708651	0.941635	0.058	1.04102	0.320545	0.682494	0.15	1.10957	0.029993	0.219647	0.084	1.05995	0.201012	0.659409
AGPAT9	NM_032717.3	2060477	ILMN_1794875	4	-0.34	0.790041	0.014022	0.222787	0.161	1.11806	0.055607	0.24613	0.373	1.29504	0.000302	0.008275	0.501	1.41519	0.003939	0.067589
AGPS	NM_003659.1	7560154	ILMN_1698209	2	0.062	1.04391	0.43091	0.848653	0.002	1.00139	0.977609	0.993993	0.063	1.04464	0.476121	0.843324	-0.06	0.959264	0.50717	0.87505
AGR2	NM_006408.2	3140463	ILMN_1814151	7	-0.005	0.99654	0.922929	0.986518	-0.019	0.986917	0.665923	0.894934	0.007	1.00486	0.909	0.981807	-0.015	0.989657	0.745099	0.953162
AGR2	NM_006408.3	1340021	ILMN_3307841	7	0.049	1.03455	0.297637	0.769053	0.036	1.02527	0.507877	0.818849	0.056	1.03958	0.356333	0.773356	-0.012	0.991717	0.804901	0.965504
AGR3	NM_176813.3	4590594	ILMN_2050246	7	0.021	1.01466	0.686984	0.937516	-0.033	0.977386	0.515994	0.824127	-0.067	0.954621	0.280023	0.712029	-0.055	0.962594	0.253613	0.716219
AGR3	NM_176813.3	5290273	ILMN_1728787	7	0.081	1.05775	0.216845	0.704583	0.053	1.03742	0.352919	0.711106	0.006	1.00417	0.904565	0.980685	-0.028	0.980779	0.660634	0.931345
AGRN	NM_198576.2	6370500	ILMN_1770454	1	0.075	1.05336	0.695647	0.939414	-0.265	0.832199	0.008012	0.05386	-0.146	0.903753	0.042464	0.274328	-0.34	0.790041	0.114208	0.519673
AGRN	NM_198576.2	4590131	ILMN_2234605	1	0.076	1.05409	0.127585	0.593548	0.033	1.02314	0.505192	0.816871	0.026	1.01819	0.602558	0.897413	-0.043	0.970634	0.318452	0.770502
AGRP	NM_007316.1	7160121	ILMN_1714253	16	0.016	1.01115	0.746533	0.949855	0.038	1.02669	0.403394	0.752454	0.011	1.00765	0.810494	0.960221	0.023	1.01607	0.632393	0.923084
AGRP	NM_001138.1	2690392	ILMN_1770336	16	0.043	1.03025	0.406377	0.833517	0.068	1.04826	0.325568	0.687035	0.066	1.04681	0.232143	0.663136	0.025	1.01748	0.713526	0.945093
AGT	NM_000029.2	2850301	ILMN_1813530	1	-0.04	0.972655	0.366406	0.812046	-0.052	0.964598	0.341546	0.70163	-0.1	0.933033	0.067527	0.36447	-0.013	0.99103	0.817226	0.968047
AGTPBP1	NM_015239.1	4760427	ILMN_1718071	9	-0.312	0.805524	0.003737	0.108467	-0.625	0.64842	5e-06	0.000176	-0.157	0.896888	0.0675	0.364379	-0.313	0.804966	0.00331	0.060115
AGTPBP1	NM_015239.1	2340347	ILMN_2223922	9	-0.168	0.890076	0.00765	0.162658	-0.128	0.915099	0.020879	0.116205	-0.056	0.961927	0.333861	0.756976	0.041	1.02883	0.436146	0.842239
AGTR1	NM_000685.4	160682	ILMN_1814327	3	0.024	1.01677	0.648336	0.927919	-0.088	0.940826	0.11157	0.392019	-0.032	0.978063	0.566467	0.884699	-0.113	0.924663	0.034471	0.274027
AGTR1	NM_004835.3	940040	ILMN_2341343	3	0.031	1.02172	0.497916	0.878868	0.035	1.02456	0.452696	0.785542	0.019	1.01326	0.808278	0.959891	0.004	1.00278	0.915357	0.986416
AGTR2	NM_000686.4	5550437	ILMN_1775634	X	0.072	1.05117	0.290215	0.76364	-0.013	0.99103	0.841586	0.957986	-0.039	0.973329	0.553581	0.879246	-0.085	0.942785	0.130163	0.552711
AGTRAP	NM_001040196.1	4610220	ILMN_1802458	1	-0.192	0.875391	0.14316	0.618182	0.111	1.07998	0.34355	0.703031	0.151	1.11034	0.201464	0.624917	0.303	1.23371	0.019714	0.19361
AGTRAP	NM_001040194.1	4900685	ILMN_2307656	1	-0.389	0.763659	0.001346	0.061726	-0.13	0.913831	0.049944	0.227143	0.456	1.37173	0.000183	0.005815	0.26	1.19748	0.014425	0.158372
AGXT	NM_000030.1	270709	ILMN_1709796	2	0.036	1.02527	0.580021	0.908206	0.047	1.03311	0.391795	0.743095	0.042	1.02954	0.423717	0.813819	0.011	1.00765	0.851346	0.974234
AGXT2	NM_031900.1	6350753	ILMN_1783963	5	0.007	1.00486	0.873107	0.977277	-0.019	0.986917	0.671622	0.897567	0.014	1.00975	0.77087	0.947943	-0.026	0.98214	0.543581	0.890278
AGXT2L1	NM_031279.2	2360762	ILMN_2134801	4	0.018	1.01255	0.737188	0.948486	0.001	1.00069	0.978587	0.994331	0.029	1.0203	0.592549	0.893177	-0.017	0.988286	0.725922	0.948331
AGXT2L1	NM_031279.2	2600768	ILMN_1757807	4	0.019	1.01326	0.723719	0.945641	0.012	1.00835	0.84284	0.958267	0.075	1.05336	0.191226	0.61266	-0.008	0.99447	0.883023	0.980566
AGXT2L2	NM_153373.1	870139	ILMN_1673529	5	0.002	1.00139	0.975332	0.995587	-0.01	0.993092	0.854401	0.961694	0.02	1.01396	0.727698	0.937063	-0.011	0.992404	0.817427	0.968047
AGXT2L2	NM_153373.1	5690082	ILMN_1686370	5	0.109	1.07848	0.034728	0.350979	0.008	1.00556	0.869747	0.965512	0.02	1.01396	0.678511	0.922182	-0.101	0.932386	0.054805	0.358759
AHCTF1	NM_015446.3	1230196	ILMN_1809139	1	0.082	1.05848	0.209494	0.697643	0.214	1.1599	0.041029	0.196539	-0.025	0.982821	0.649662	0.912807	0.131	1.09505	0.225667	0.685527
AHCTF1	NM_015446.3	6040747	ILMN_1747504	1	-0.093	0.937571	0.150095	0.627291	-0.023	0.984184	0.652749	0.890331	-0.006	0.99585	0.918033	0.983548	0.07	1.04972	0.194257	0.65048
AHCTF1	XM_942402.1	6220427	ILMN_1666679		-0.027	0.981459	0.575171	0.90625	0.03	1.02101	0.554565	0.844395	0.06	1.04247	0.334905	0.75789	0.057	1.0403	0.296938	0.754349
AHCY	NM_000687.1	3710537	ILMN_1657862	20	0.137	1.09962	0.42465	0.845371	0.415	1.3333	0.002182	0.018818	0.198	1.14711	0.175641	0.591953	0.278	1.21251	0.104105	0.499658
AHCYL1	NM_006621.4	1170440	ILMN_1770412	1	0.177	1.13053	0.158618	0.636781	-0.231	0.852044	0.051476	0.232472	0.083	1.05922	0.499635	0.854087	-0.408	0.753667	0.000233	0.011246
AHCYL2	NM_015328.1	870039	ILMN_1712786	7	-0.061	0.958599	0.301099	0.771175	-0.083	0.944092	0.105143	0.378258	-0.034	0.976709	0.565358	0.884208	-0.021	0.985549	0.687829	0.938924
AHDC1	NM_001029882.1	4250376	ILMN_1680111	1	-0.15	0.90125	0.01686	0.246857	-0.172	0.887611	0.005375	0.038894	-0.059	0.959929	0.234658	0.665611	-0.022	0.984866	0.676146	0.935452
AHI1	NM_017651.3	5860253	ILMN_1791006	6	0.001	1.00069	0.977771	0.996132	0.053	1.03742	0.272539	0.633782	0.006	1.00417	0.943585	0.988926	0.052	1.0367	0.330104	0.780152
AHNAK	NM_001620.1	450553	ILMN_1714567	11	-0.531	0.692075	0.000878	0.048331	0.22	1.16473	0.002677	0.022261	0.341	1.26663	0.001525	0.026233	0.75	1.68179	6.1e-05	0.004942
AHNAK	NM_024060.2	3710400	ILMN_1752159	11	-0.442	0.736113	0.003509	0.104864	-0.451	0.731536	8e-06	0.000242	-0.222	0.857376	0.023985	0.18808	-0.009	0.993781	0.929725	0.989109
AHNAK	NM_001620.1	2810482	ILMN_1792495	11	-0.112	0.925304	0.050816	0.418717	-0.103	0.931095	0.047502	0.219197	-0.061	0.958599	0.37877	0.788579	0.009	1.00626	0.843986	0.973298
AHNAK2	NM_138420.2	5260594	ILMN_3243156	14	-0.072	0.951318	0.380309	0.821302	0.142	1.10343	0.076159	0.305309	0.108	1.07773	0.188538	0.609747	0.214	1.1599	0.01035	0.127704
AHR	NM_001621.2	4890672	ILMN_1812640	7	0.492	1.40639	0.027876	0.317693	1.145	2.21146	2e-06	8e-05	-0.088	0.940826	0.362479	0.777378	0.653	1.57243	0.011976	0.140868
AHR	NM_001621.3	6060367	ILMN_2162799	7	-0.084	0.943438	0.201061	0.68958	0.152	1.11111	0.016846	0.097573	0.208	1.15509	0.002116	0.033029	0.235	1.17691	0.008481	0.112125
AHRR	NM_020731.3	5560433	ILMN_1782679	5	-0.042	0.971307	0.440314	0.853965	0.023	1.01607	0.612417	0.871727	0.066	1.04681	0.178943	0.596503	0.065	1.04608	0.233068	0.693912
AHSA1	NM_012111.1	4880561	ILMN_1703617	14	-0.206	0.866938	0.135964	0.60664	-0.656	0.634635	0.000378	0.004495	-0.518	0.698339	0.001533	0.026341	-0.45	0.732043	0.003203	0.058819
AHSA2	NM_152392.2	1170220	ILMN_1798308	2	-0.028	0.980779	0.629997	0.92256	-0.027	0.981459	0.664527	0.89443	-0.049	0.966606	0.501684	0.854929	0.001	1.00069	0.978068	0.996455
AHSG	NM_001622.1	2320377	ILMN_1730625	3	0.021	1.01466	0.703309	0.940891	0.008	1.00556	0.875324	0.967226	0.032	1.02243	0.578629	0.888009	-0.014	0.990343	0.792076	0.962055
AHSP	NM_016633.2	2350274	ILMN_1696512	16	-0.036	0.975355	0.598656	0.913411	0.054	1.03814	0.335395	0.696103	-0.065	0.955945	0.261968	0.69477	0.089	1.06363	0.130668	0.554047
AICDA	NM_020661.1	6110358	ILMN_2164164	12	-0.008	0.99447	0.919095	0.985561	-0.042	0.971307	0.547237	0.841416	-0.003	0.997923	0.964198	0.99319	-0.034	0.976709	0.504964	0.874236
AIDA	NM_022831.2	4640445	ILMN_3240117	1	-0.22	0.858565	0.073588	0.487804	-0.4	0.757858	0.001856	0.016457	-0.332	0.794434	0.005604	0.067269	-0.18	0.882703	0.106776	0.504934
AIF1	NM_004847.2	6520154	ILMN_1771827	6	-0.033	0.977386	0.609619	0.917091	-0.052	0.964598	0.260664	0.621828	-0.053	0.96393	0.323211	0.747773	-0.019	0.986917	0.765087	0.957451
AIF1	NM_032955.1	3800047	ILMN_1792473	6	0.023	1.01607	0.699584	0.940073	0.019	1.01326	0.801625	0.945576	0.032	1.02243	0.589955	0.892002	-0.005	0.99654	0.948436	0.991418
AIF1	NM_001623.3	1940047	ILMN_1703538	6	0.041	1.02883	0.440966	0.854142	0.052	1.0367	0.387024	0.739448	0.072	1.05117	0.304247	0.733301	0.011	1.00765	0.855419	0.974979
AIF1L	NM_031426.2	1410021	ILMN_3246401	9	-0.155	0.898132	0.327783	0.787789	-0.428	0.743291	0.001162	0.011281	-0.431	0.741747	0.002063	0.032479	-0.273	0.827597	0.063566	0.389175
AIF1L	NM_031426.2	4010647	ILMN_1770725	9	-0.093	0.937571	0.371572	0.815656	-0.113	0.924663	0.185717	0.52487	-0.164	0.892547	0.106568	0.469562	-0.02	0.986233	0.751964	0.954424
AIFM1	NM_145813.1	1500689	ILMN_2313821	X	0.21	1.15669	0.196617	0.684973	-0.035	0.976032	0.642108	0.885415	-0.288	0.819037	0.001865	0.030085	-0.245	0.843816	0.122215	0.536254
AIFM1	NM_145813.1	3290341	ILMN_1668408	X	0.094	1.06733	0.195918	0.684276	-0.092	0.938221	0.103652	0.375091	-0.113	0.924663	0.07744	0.394095	-0.186	0.87904	0.013204	0.150267
AIFM1	NM_004208.2	1940577	ILMN_1717357	X	0.048	1.03383	0.582945	0.908986	-0.17	0.888843	0.05261	0.236179	-0.055	0.962594	0.631753	0.906875	-0.218	0.859756	0.002084	0.044574
AIFM1	NM_145812.1	5420414	ILMN_1667183	X	0.045	1.03168	0.570495	0.904996	-0.068	0.95396	0.222709	0.5775	-0.032	0.978063	0.58253	0.889957	-0.113	0.924663	0.161271	0.607601
AIFM2	NM_032797.4	270612	ILMN_1712639	10	-0.044	0.969962	0.496438	0.878704	0.151	1.11034	0.035024	0.174486	0.295	1.22688	0.001304	0.023604	0.195	1.14472	0.014747	0.160129
AIFM3	NM_001018060.1	4260551	ILMN_1704173	22	0.06	1.04247	0.367114	0.812411	-0.029	0.980099	0.614159	0.8728	-0.09	0.939523	0.116485	0.491587	-0.089	0.940174	0.212846	0.672095
AIG1	NM_016108.2	3940056	ILMN_1797974	6	-0.095	0.936272	0.370241	0.814593	0.47	1.38511	0.000109	0.001701	0.422	1.33978	0.001326	0.023874	0.565	1.47939	8.9e-05	0.006374
AIM1	NM_001624.2	580255	ILMN_1688625	6	0.024	1.01677	0.666493	0.931836	-0.015	0.989657	0.771044	0.935944	-0.025	0.982821	0.688307	0.925723	-0.039	0.973329	0.436817	0.842812
AIM1L	NM_017977.2	610397	ILMN_1776916	1	-0.012	0.991717	0.845447	0.971948	0.002	1.00139	0.972052	0.992504	-0.056	0.961927	0.295605	0.725583	0.014	1.00975	0.814302	0.967395
AIM1L	NM_001039775.1	4220376	ILMN_2113340	1	-0.075	0.949342	0.200351	0.689054	0.069	1.04899	0.219418	0.573431	0.264	1.2008	0.002344	0.035583	0.144	1.10496	0.023213	0.213233
AIM1L	NM_001039775.2	7000082	ILMN_3307874	1	-0.043	0.970634	0.541106	0.893305	0.112	1.08073	0.139122	0.44849	0.313	1.24229	0.001699	0.028357	0.155	1.11342	0.079802	0.437945
AIM1L	NM_001039775.1	6620386	ILMN_1669557	1	-0.214	0.862144	0.001348	0.061726	-0.044	0.969962	0.372742	0.727424	0.363	1.2861	0.013374	0.125313	0.17	1.12506	0.005674	0.085382
AIM2	NM_004833.1	1260270	ILMN_1681301	1	-0.111	0.925946	0.043054	0.388479	-0.014	0.990343	0.774317	0.937066	-0.111	0.925946	0.094474	0.439987	0.097	1.06955	0.0942	0.476521
AIM2	NM_004833.1	130753	ILMN_2214232	1	-0.015	0.989657	0.810819	0.964288	0.069	1.04899	0.220836	0.57529	0.064	1.04536	0.336975	0.758942	0.084	1.05995	0.154829	0.597257
AIMP2	NM_006303.3	6960056	ILMN_1673252	7	-0.373	0.772175	0.000504	0.036144	-0.761	0.590087	0	8e-06	-0.633	0.644834	1e-06	0.00018	-0.388	0.764188	0.000283	0.012601
AIP	NM_003977.1	610689	ILMN_2103841	11	-0.367	0.775393	0.022175	0.284037	-0.035	0.976032	0.712106	0.914202	0.528	1.44193	0.001778	0.029179	0.332	1.25876	0.005449	0.083032
AIPL1	NM_001033054.1	3610138	ILMN_2415292	17	0.016	1.01115	0.775904	0.954781	-0.047	0.967947	0.298298	0.660978	0.054	1.03814	0.285685	0.717034	-0.063	0.957271	0.292561	0.750284
AIPL1	NM_014336.3	240142	ILMN_2368268	17	-0.016	0.988971	0.788761	0.958542	0.006	1.00417	0.916607	0.979486	0.124	1.08975	0.032692	0.232432	0.022	1.01537	0.751804	0.954365
AIRE	NM_000383.1	5820386	ILMN_2261519	21	0.29	1.22264	0.143776	0.618677	1.204	2.30378	0	2.1e-05	-0.204	0.86814	0.075862	0.390096	0.914	1.88426	0.000987	0.027822
AIRE	NM_000383.2	5820689	ILMN_1791236	21	-0.136	0.910039	0.020193	0.272339	-0.126	0.916369	0.035954	0.177939	-0.082	0.944747	0.214862	0.642251	0.01	1.00696	0.856523	0.975298
AIRE	NM_000658.1	2000093	ILMN_1670282	21	0.038	1.02669	0.474432	0.869141	0.044	1.03097	0.38553	0.738068	0.021	1.01466	0.681583	0.923187	0.005	1.00347	0.903649	0.984679
AJAP1	NM_001042478.1	5360195	ILMN_2242299	1	-0.047	0.967947	0.284355	0.759527	0.007	1.00486	0.892029	0.971573	-0.07	0.952638	0.269335	0.702089	0.054	1.03814	0.264215	0.725796
AJAP1	NM_018836.3	1300647	ILMN_1723521	1	0.019	1.01326	0.680184	0.935849	0.065	1.04608	0.28734	0.649935	0.008	1.00556	0.874244	0.973896	0.046	1.0324	0.426641	0.837375
AJAP1	NM_001042478.1	6480484	ILMN_2312764	1	0.073	1.0519	0.15565	0.633178	0.046	1.0324	0.403204	0.75244	0.049	1.03455	0.361894	0.777144	-0.027	0.981459	0.576021	0.903917
AK1	NM_000476.1	5130162	ILMN_1779965	9	0.218	1.16312	0.242273	0.727065	0.95	1.93187	0	8e-06	1.355	2.55797	0	2e-06	0.732	1.66094	0.003634	0.064093
AK2	NM_001625.2	1990491	ILMN_1670542	1	-0.081	0.945402	0.474605	0.869141	0.591	1.50629	3e-06	0.000108	0.628	1.54542	0.000254	0.007301	0.672	1.59328	0.000319	0.013614
AK2	NM_001625.2	5720669	ILMN_1716053	1	0.04	1.02811	0.59879	0.913543	0.402	1.32134	4e-05	0.000785	0.417	1.33515	0.000132	0.004674	0.362	1.28521	0.001591	0.037245
AK2	NM_013411.3	3140441	ILMN_1655645	1	0.149	1.1088	0.020791	0.27582	-0.05	0.965936	0.316819	0.679361	-0.246	0.843231	0.00434	0.055799	-0.199	0.871154	0.003681	0.064649
AK2P2	XR_017211.2	5090554	ILMN_3236458		-0.112	0.925304	0.191273	0.678366	0.097	1.06955	0.157291	0.479885	-0.033	0.977386	0.605653	0.898223	0.209	1.15589	0.021265	0.202699
AK3	NM_016282.2	670463	ILMN_1778173	9	0.163	1.11961	0.045207	0.396486	0.487	1.40153	2.2e-05	0.000506	0.392	1.31221	0.001047	0.020159	0.324	1.2518	0.000193	0.010142
AK3L1	NM_203464.1	4610554	ILMN_1798249	1	0.021	1.01466	0.749712	0.950765	0.585	1.50004	3.2e-05	0.000665	0.534	1.44794	0.000128	0.004611	0.564	1.47836	0.000114	0.00731
AK3L1	NM_203464.1	4290192	ILMN_1764090	1	-0.298	0.813379	0.030529	0.330525	0.363	1.2861	4.5e-05	0.000864	0.393	1.31312	1.9e-05	0.001362	0.661	1.58118	0.000428	0.016492
AK3L1	NM_013410.2	160148	ILMN_2338038	1	-0.119	0.920826	0.20549	0.692796	0.412	1.33053	2.3e-05	0.000531	0.236	1.17772	0.001621	0.027393	0.53	1.44393	0.000209	0.010514
AK3L1	NM_203464.1	1470681	ILMN_1686522	1	-0.038	0.974004	0.368456	0.813365	0.025	1.01748	0.594562	0.864089	-0.014	0.990343	0.801435	0.957973	0.063	1.04464	0.189952	0.645101
AK5	NM_012093.2	6270148	ILMN_2387712	1	-0.065	0.955945	0.175301	0.659135	0.041	1.02883	0.437917	0.774758	-0.007	0.99516	0.897986	0.979606	0.106	1.07624	0.06927	0.408646
AK5	NM_012093.2	5960209	ILMN_2283473	1	-0.043	0.970634	0.332823	0.790832	0.031	1.02172	0.575305	0.854616	-0.001	0.999307	0.98995	0.998184	0.073	1.0519	0.198752	0.656577
AK5	NM_174858.1	2680220	ILMN_1656593	1	0.031	1.02172	0.598502	0.913283	0.015	1.01045	0.804403	0.946352	0.116	1.08373	0.075122	0.387888	-0.016	0.988971	0.750902	0.954192
AK7	NM_152327.2	2760470	ILMN_1684305	14	0.015	1.01045	0.736213	0.948124	0.047	1.03311	0.297765	0.66034	0.022	1.01537	0.637389	0.908587	0.032	1.02243	0.477502	0.85998
AKAP1	NM_003488.3	4810494	ILMN_1712530	17	-0.168	0.890076	0.170562	0.652579	-0.302	0.811127	0.001181	0.01141	-0.299	0.812816	0.012221	0.11736	-0.134	0.911301	0.200406	0.658951
AKAP1	NM_139275.1	7040288	ILMN_1662598	17	-0.014	0.990343	0.773147	0.954188	-0.04	0.972655	0.419787	0.763133	-0.08	0.946058	0.201224	0.624763	-0.025	0.982821	0.609927	0.91513
AKAP10	NM_007202.2	460020	ILMN_1718808	17	0.004	1.00278	0.944149	0.990915	-0.107	0.928517	0.049872	0.226951	-0.079	0.946714	0.189786	0.611083	-0.111	0.925946	0.11438	0.520148
AKAP11	NM_016248.2	6420398	ILMN_1693220	13	-0.025	0.982821	0.701819	0.940589	-0.208	0.865737	0.004832	0.035632	-0.177	0.88454	0.008604	0.092029	-0.183	0.880869	0.028381	0.242488
AKAP11	NM_016248.2	1450333	ILMN_2293758	13	0	1	0.999166	0.999868	-0.13	0.913831	0.02094	0.116447	-0.102	0.93174	0.28909	0.72031	-0.13	0.913831	0.193772	0.6498
AKAP11	NM_144490.1	4570717	ILMN_1735539	13	0.008	1.00556	0.891509	0.980339	-0.011	0.992404	0.863148	0.963835	-0.036	0.975355	0.532579	0.870326	-0.019	0.986917	0.73702	0.951524
AKAP11	NM_144490.1	5720731	ILMN_2280189	13	-0.013	0.99103	0.849412	0.972601	0.036	1.02527	0.54293	0.838939	0.038	1.02669	0.445899	0.826817	0.049	1.03455	0.523943	0.882779
AKAP11	NM_016248.2	1070484	ILMN_1783818	13	0.011	1.00765	0.858272	0.974415	0.116	1.08373	0.038595	0.187794	0.044	1.03097	0.474154	0.842411	0.105	1.07549	0.149433	0.587891
AKAP12	NM_005100.2	6940475	ILMN_2308950	6	-0.233	0.850864	0.385672	0.82394	-0.31	0.806642	0.02305	0.125731	-0.12	0.920188	0.188905	0.610075	-0.077	0.948027	0.768737	0.957712
AKAP12	NM_144497.1	6900706	ILMN_1686846	6	-0.064	0.956608	0.644646	0.926968	-0.133	0.911933	0.216883	0.569755	-0.091	0.938872	0.383023	0.790225	-0.069	0.953299	0.489892	0.867055
AKAP12	NM_005100.2	3290564	ILMN_1715532	6	-0.071	0.951978	0.317769	0.782768	-0.035	0.976032	0.703901	0.911091	-0.003	0.997923	0.965085	0.993242	0.036	1.02527	0.678456	0.935977
AKAP12	NM_144497.1	670041	ILMN_1684836	6	-0.115	0.923382	0.582426	0.908762	-0.288	0.819037	0.124808	0.419108	0.11	1.07923	0.554611	0.879745	-0.173	0.886996	0.094637	0.477868
AKAP13	NM_007200.3	3940440	ILMN_2396956	15	-0.001	0.999307	0.990374	0.998122	-0.097	0.934975	0.070322	0.289612	-0.148	0.902501	0.067311	0.363925	-0.096	0.935623	0.351091	0.793316
AKAP13	NM_144767.3	650050	ILMN_1709101	15	0.009	1.00626	0.880534	0.977847	-0.053	0.96393	0.29826	0.660947	-0.067	0.954621	0.260342	0.693118	-0.063	0.957271	0.287197	0.745825
AKAP13	NM_006738.4	2060341	ILMN_1752247	15	-0.034	0.976709	0.555934	0.899487	0.031	1.02172	0.565224	0.850382	-0.056	0.961927	0.286289	0.717588	0.065	1.04608	0.301262	0.757651
AKAP14	NM_178813.5	270192	ILMN_1679987	X	-0.082	0.944747	0.114767	0.572386	-0.065	0.955945	0.224036	0.579133	-0.023	0.984184	0.662924	0.916578	0.018	1.01255	0.683472	0.937542
AKAP14	NM_178813.5	3850102	ILMN_1802537	X	-0.005	0.99654	0.919252	0.985561	0.016	1.01115	0.769961	0.935588	0.024	1.01677	0.649178	0.91267	0.022	1.01537	0.669746	0.933319
AKAP14	NM_001008535.1	270497	ILMN_1673542	X	-0.009	0.993781	0.847273	0.972276	0.016	1.01115	0.772339	0.936366	0.085	1.06069	0.174575	0.590167	0.025	1.01748	0.644807	0.92716
AKAP2	NM_001004065.3	2970162	ILMN_1675507	9	0.004	1.00278	0.94293	0.990631	0.067	1.04754	0.252024	0.612776	-0.046	0.968618	0.318298	0.744058	0.063	1.04464	0.377206	0.809908
AKAP2	NM_001004065.3	3610068	ILMN_1691959	9	0.136	1.09885	0.024946	0.300722	0.122	1.08824	0.042034	0.200157	0.071	1.05044	0.240192	0.67074	-0.014	0.990343	0.748664	0.954064
AKAP2	NM_001004065.3	6840608	ILMN_1737754	9	0.003	1.00208	0.950951	0.991768	0.143	1.1042	0.014891	0.0884	0.091	1.06511	0.079528	0.400333	0.14	1.10191	0.032769	0.265822
AKAP3	NM_006422.2	4860088	ILMN_1808905	12	0.024	1.01677	0.627289	0.922013	0.012	1.00835	0.814785	0.949483	0.026	1.01819	0.635975	0.90824	-0.012	0.991717	0.781061	0.959792
AKAP4	NM_139289.1	7100575	ILMN_1734794	X	0.015	1.01045	0.815317	0.965652	-0.025	0.982821	0.600817	0.866568	-0.012	0.991717	0.834026	0.965194	-0.04	0.972655	0.53781	0.888215
AKAP4	NM_139289.1	5560450	ILMN_2253207	X	0.009	1.00626	0.890123	0.979916	-0.011	0.992404	0.845315	0.958717	-0.001	0.999307	0.980792	0.995963	-0.021	0.985549	0.768489	0.957712
AKAP4	NM_003886.2	510008	ILMN_2268556	X	0.01	1.00696	0.804804	0.962693	0.019	1.01326	0.672699	0.898223	0.003	1.00208	0.951302	0.990566	0.008	1.00556	0.836208	0.972062
AKAP5	NM_004857.2	3800189	ILMN_1690818	14	0.017	1.01185	0.70026	0.940126	-0.047	0.967947	0.306925	0.669827	-0.06	0.959264	0.21652	0.644338	-0.064	0.956608	0.19699	0.654031
AKAP6	NM_004274.3	1510224	ILMN_1770758	14	0.017	1.01185	0.719829	0.944394	-0.001	0.999307	0.980769	0.994801	0.092	1.06585	0.061047	0.342544	-0.018	0.987601	0.714404	0.94517
AKAP7	NM_004842.2	5340504	ILMN_1733690	6	0.025	1.01748	0.696886	0.939617	-0.096	0.935623	0.110858	0.390448	-0.092	0.938221	0.237088	0.667887	-0.122	0.918913	0.04201	0.307836
AKAP7	NM_004842.2	6380689	ILMN_2410406	6	0.008	1.00556	0.886742	0.97916	-0.024	0.983502	0.649678	0.888772	0.001	1.00069	0.979358	0.995768	-0.032	0.978063	0.579256	0.905099
AKAP7	NM_016377.2	4780619	ILMN_1703049	6	0.037	1.02598	0.48969	0.875841	0.012	1.00835	0.801107	0.94544	0.019	1.01326	0.707654	0.931708	-0.025	0.982821	0.593693	0.910092
AKAP7	NM_138633.1	2370220	ILMN_2293529	6	0.046	1.0324	0.573092	0.905526	0.003	1.00208	0.962014	0.990436	0.034	1.02385	0.651683	0.913144	-0.043	0.970634	0.471067	0.85704
AKAP8	NM_005858.2	6550053	ILMN_1741572	19	0.12	1.08673	0.141988	0.616707	0.443	1.35943	3.5e-05	0.000714	0.155	1.11342	0.024248	0.189452	0.323	1.25093	0.004642	0.075501
AKAP8L	NM_014371.2	5340593	ILMN_1768962	19	-0.243	0.844986	0.007068	0.155041	0.135	1.09809	0.115262	0.399276	0.368	1.29056	0.000355	0.009261	0.378	1.29954	0.002955	0.055799
AKAP9	NM_147185.1	3170630	ILMN_2400663	7	-0.082	0.944747	0.248067	0.731571	0.006	1.00417	0.910465	0.977477	-0.023	0.984184	0.67447	0.920467	0.088	1.0629	0.225357	0.685432
AKAP9	NM_147166.1	3290592	ILMN_2396691	7	0.058	1.04102	0.353648	0.803765	0.014	1.00975	0.759471	0.931423	0.043	1.03025	0.350889	0.768831	-0.044	0.969962	0.468788	0.856006
AKIRIN1	NM_024595.1	1260544	ILMN_1679383	1	-0.192	0.875391	0.003182	0.099636	-0.054	0.963262	0.327098	0.688882	-0.026	0.98214	0.658944	0.915586	0.138	1.10038	0.039373	0.296244
AKIRIN1	NM_024595.1	520040	ILMN_1802799	1	-0.172	0.887611	0.023634	0.293068	-0.114	0.924023	0.070808	0.291157	0.136	1.09885	0.046349	0.29	0.059	1.04174	0.24958	0.713206
AKIRIN1	NM_024595.1	5820133	ILMN_1658337	1	0.045	1.03168	0.476932	0.87014	0.12	1.08673	0.058365	0.254459	0.296	1.22774	0.005507	0.066429	0.075	1.05336	0.27636	0.737436
AKIRIN2	NM_018064.2	5690202	ILMN_2148847	6	-0.117	0.922103	0.324466	0.786111	-0.172	0.887611	0.105912	0.380062	0.033	1.02314	0.758115	0.945057	-0.054	0.963262	0.680022	0.93625
AKNA	NM_030767.3	2850010	ILMN_1770673		-0.109	0.927231	0.198802	0.687245	-0.321	0.800515	5e-05	0.000934	-0.184	0.880259	0.004319	0.055579	-0.212	0.86334	0.02606	0.228807
AKNAD1	NM_152763.3	3130605	ILMN_2205785	1	-0.043	0.970634	0.427648	0.84674	0	1	0.997282	0.999368	0.074	1.05263	0.150416	0.552189	0.044	1.03097	0.475694	0.858938
AKR1A1	NM_006066.2	5550543	ILMN_1774938	1	0.172	1.12662	0.014543	0.227141	-0.033	0.977386	0.559594	0.847497	-0.04	0.972655	0.442834	0.825631	-0.206	0.866938	0.016326	0.171482
AKR1A1	NM_153326.1	6130424	ILMN_2380771	1	0.056	1.03958	0.489527	0.875753	-0.349	0.785128	0.000257	0.003302	-0.376	0.770571	0.000117	0.004341	-0.405	0.755236	0.000541	0.019158
AKR1A1	NM_006066.2	1500504	ILMN_1728047	1	0.115	1.08298	0.22853	0.716018	-0.296	0.814508	0.005583	0.040143	-0.39	0.76313	0.002877	0.041271	-0.411	0.752102	0.000277	0.012505
AKR1B1	NM_001628.2	4260139	ILMN_1701731	7	0.217	1.16231	0.063019	0.456136	0.306	1.23628	0.007489	0.051037	0.311	1.24057	0.005339	0.065008	0.089	1.06363	0.442905	0.845797
AKR1B10	NM_020299.3	5310646	ILMN_1672148	7	-0.004	0.997231	0.941578	0.990113	1.239	2.36035	0	3e-06	1.993	3.98064	0	1e-05	1.243	2.3669	0	0.000473
AKR1B15	NM_001080538.1	2760274	ILMN_2278335	7	-0.013	0.99103	0.798912	0.96119	0.369	1.29146	5.3e-05	0.000974	0.694	1.61776	1e-06	0.000163	0.383	1.30405	0.000342	0.014173
AKR1C1	NM_001353.5	1010358	ILMN_1662507	10	0.052	1.0367	0.256534	0.738039	0.002	1.00139	0.966452	0.991313	0.05	1.03526	0.3155	0.74198	-0.05	0.965936	0.371469	0.806564
AKR1C2	NM_001354.4	5340129	ILMN_2412336	10	0.03	1.02101	0.591702	0.911185	0.053	1.03742	0.365436	0.721517	-0.021	0.985549	0.678676	0.922212	0.023	1.01607	0.739229	0.952219
AKR1C2	XM_943415.1	4900113	ILMN_1773417		-0.013	0.99103	0.835909	0.970356	0.032	1.02243	0.587114	0.86067	-0.005	0.99654	0.944799	0.989023	0.045	1.03168	0.355623	0.796394
AKR1C2	NM_001135241.1	6510692	ILMN_3237488	10	-0.03	0.97942	0.521664	0.886617	-0.059	0.959929	0.201462	0.548564	0.022	1.01537	0.702391	0.931025	-0.029	0.980099	0.527723	0.884362
AKR1C2	XM_943427.1	7200563	ILMN_1730191		-0.002	0.998615	0.964415	0.993479	-0.038	0.974004	0.440925	0.777287	0.024	1.01677	0.623766	0.904958	-0.037	0.97468	0.440919	0.84446
AKR1C2	XM_943412.1	3610767	ILMN_1719154		0.039	1.0274	0.394804	0.82828	0.094	1.06733	0.09066	0.343186	0.061	1.04319	0.310973	0.739644	0.055	1.03886	0.271927	0.733763
AKR1C2	XM_937757.1	1510528	ILMN_1668617		0.045	1.03168	0.374506	0.817724	0.089	1.06363	0.153148	0.473168	0.092	1.06585	0.135071	0.527265	0.044	1.03097	0.509882	0.876348
AKR1C3	NM_003739.4	7210632	ILMN_1713124	10	-0.227	0.85441	0.002575	0.089346	-0.239	0.847332	0.000356	0.004286	0.223	1.16716	0.002292	0.035062	-0.011	0.992404	0.830345	0.970641
AKR1C4	NM_001818.2	3120598	ILMN_1687757	10	-0.083	0.944092	0.212489	0.700969	-0.046	0.968618	0.343299	0.70279	0.012	1.00835	0.835558	0.965407	0.037	1.02598	0.553186	0.893914
AKR1C4	NM_001818.2	2650736	ILMN_1668880	10	0.04	1.02811	0.374843	0.818057	-0.012	0.991717	0.834342	0.956109	0.043	1.03025	0.399977	0.801531	-0.053	0.96393	0.374069	0.807812
AKR1CL1	NM_001007536.2	6940278	ILMN_1685803	10	0.02	1.01396	0.686299	0.937341	-0.04	0.972655	0.433307	0.771185	-0.027	0.981459	0.622818	0.904796	-0.06	0.959264	0.252859	0.715909
AKR1CL1	NM_001007536.3	1400066	ILMN_3307911		0.089	1.06363	0.166265	0.647332	-0.006	0.99585	0.891003	0.971159	0.01	1.00696	0.821131	0.961902	-0.095	0.936272	0.138482	0.568838
AKR1D1	NM_005989.2	1770341	ILMN_1692661	7	-0.091	0.938872	0.124774	0.588479	-0.067	0.954621	0.223241	0.578151	-0.073	0.950659	0.181503	0.600546	0.024	1.01677	0.623666	0.920689
AKR1D1	NM_005989.2	5860347	ILMN_2157277	7	0.649	1.56808	0.013062	0.214868	1.694	3.23553	0	3e-06	0.335	1.26138	0.016556	0.144935	1.045	2.06337	0.001369	0.034086
AKR1E2	NM_001040177.1	5720372	ILMN_1694985	10	0.097	1.06955	0.084294	0.511815	0.013	1.00905	0.780451	0.938706	-0.039	0.973329	0.392103	0.796815	-0.084	0.943438	0.138909	0.569815
AKR7A2	NM_003689.2	6180681	ILMN_1677043	1	-0.111	0.925946	0.373705	0.817219	-0.23	0.852635	0.016324	0.095248	0.06	1.04247	0.500842	0.854528	-0.119	0.920826	0.280555	0.740668
AKR7A3	NM_012067.2	270300	ILMN_1718483	1	-0.079	0.946714	0.10301	0.552391	-0.04	0.972655	0.423761	0.765195	-0.043	0.970634	0.410466	0.807148	0.039	1.0274	0.41393	0.829579
AKR7A3	NM_012067.2	70484	ILMN_2145396	1	0.151	1.11034	0.31093	0.777973	0.168	1.1235	0.133108	0.436267	0.086	1.06142	0.439769	0.823567	0.017	1.01185	0.866823	0.977265
AKR7L	NM_201252.2	840039	ILMN_3243152		0.038	1.02669	0.485711	0.873741	0.096	1.06881	0.07019	0.289197	0.039	1.0274	0.463431	0.836977	0.058	1.04102	0.285777	0.74498
AKT1	NM_001014431.1	6200431	ILMN_2410909	14	-0.19	0.876606	0.149015	0.625935	-0.694	0.618138	0	2.1e-05	-0.507	0.703684	3.1e-05	0.001826	-0.504	0.705149	0.00324	0.059223
AKT1	NM_001014432.1	2470619	ILMN_2388507	14	0.243	1.18345	0.011315	0.199216	-0.448	0.733058	2.3e-05	0.000519	-0.198	0.871758	0.024263	0.189502	-0.69	0.619854	1.6e-05	0.002638
AKT1	NM_005163.2	7210424	ILMN_1748661	14	0.024	1.01677	0.716449	0.943764	0.117	1.08448	0.04275	0.202791	-0.041	0.971981	0.543745	0.874537	0.093	1.06659	0.146004	0.582583
AKT1S1	NM_032375.2	3870092	ILMN_1726906	19	-0.167	0.890693	0.12372	0.586293	-0.205	0.867539	0.003476	0.02724	0.134	1.09733	0.030108	0.220036	-0.038	0.974004	0.698448	0.941198
AKT2	NM_001626.3	5570041	ILMN_1743347	19	-0.032	0.978063	0.605625	0.916378	-0.039	0.973329	0.510436	0.820436	0.084	1.05995	0.25602	0.687975	-0.006	0.99585	0.91355	0.986178
AKT3	NM_181690.1	5870561	ILMN_2325610	1	0.029	1.0203	0.545989	0.894967	0.062	1.04391	0.251172	0.611993	-0.017	0.988286	0.775276	0.949798	0.032	1.02243	0.565307	0.899487
AKT3	NM_181690.1	2570044	ILMN_1733598	1	-0.085	0.942785	0.206027	0.693125	-0.039	0.973329	0.488507	0.806903	-0.011	0.992404	0.855541	0.969838	0.046	1.0324	0.404916	0.824938
AKT3	NM_181690.1	5490246	ILMN_2325612	1	0.013	1.00905	0.813137	0.964821	0.008	1.00556	0.864873	0.964236	0.075	1.05336	0.257805	0.689724	-0.005	0.99654	0.932168	0.989389
AKT3	NM_005465.3	5220307	ILMN_1757130	1	0.003	1.00208	0.962047	0.993164	0.025	1.01748	0.684304	0.903333	0.083	1.05922	0.233624	0.664602	0.022	1.01537	0.682816	0.937379
AKTIP	NM_022476.2	5720703	ILMN_1665982	16	-0.47	0.721965	0.002576	0.089346	-0.268	0.83047	0.000719	0.007642	0.138	1.10038	0.038387	0.257881	0.202	1.15029	0.09875	0.487946
AKTIP	NM_001012398.1	4480338	ILMN_2377240	16	-0.297	0.813943	0.001951	0.075519	-0.225	0.855595	0.001758	0.01574	0.177	1.13053	0.061921	0.345446	0.072	1.05117	0.220933	0.681169
ALAD	NM_001003945.1	6020592	ILMN_1679898	9	0.09	1.06437	0.113442	0.57057	0.029	1.0203	0.612086	0.871512	-0.044	0.969962	0.404264	0.804279	-0.061	0.958599	0.329261	0.779402
ALAD	NM_001003945.1	3120162	ILMN_1747577	9	0.176	1.12975	0.083043	0.510007	0.096	1.06881	0.078949	0.312939	-0.044	0.969962	0.473436	0.842005	-0.08	0.946058	0.358854	0.798635
ALAD	NM_000031.4	2070397	ILMN_2404657	9	0.029	1.0203	0.605209	0.91635	0.187	1.13839	0.070405	0.289899	0.142	1.10343	0.138955	0.533925	0.158	1.11574	0.147273	0.58435
ALAS1	NM_000688.4	7150014	ILMN_1728309	3	-0.01	0.993092	0.853192	0.973603	0.021	1.01466	0.716151	0.915712	-0.059	0.959929	0.30714	0.73578	0.031	1.02172	0.503444	0.873471
ALAS1	NM_000688.4	5220097	ILMN_1700047	3	-0.039	0.973329	0.501635	0.880145	0.13	1.09429	0.04659	0.216085	0.131	1.09505	0.045552	0.286873	0.169	1.12428	0.009521	0.120499
ALAS1	NM_199166.1	5860278	ILMN_2385647	3	0	1	0.998815	0.999868	0.283	1.21672	0.000338	0.00412	0.149	1.1088	0.013487	0.126095	0.283	1.21672	0.010567	0.129338
ALAS2	NM_001037968.1	4180768	ILMN_2367126	X	-0.037	0.97468	0.412406	0.837236	-0.021	0.985549	0.660965	0.892608	-0.067	0.954621	0.217872	0.646273	0.017	1.01185	0.694217	0.940439
ALAS2	NM_001037968.1	5270338	ILMN_2271875	X	-0.002	0.998615	0.967873	0.994335	0.011	1.00765	0.879249	0.968256	-0.034	0.976709	0.483404	0.847392	0.014	1.00975	0.875551	0.978932
ALAS2	NM_001037967.1	1230376	ILMN_1708323	X	-0.004	0.997231	0.92902	0.98825	-0.018	0.987601	0.722235	0.918406	0.028	1.0196	0.579889	0.88881	-0.014	0.990343	0.764631	0.957451
ALB	NM_000477.3	5910010	ILMN_1682763	4	-0.001	0.999307	0.975978	0.995651	-0.012	0.991717	0.794711	0.9433	-0.012	0.991717	0.806289	0.959459	-0.011	0.992404	0.811152	0.966972
ALB	NM_000477.3	4230156	ILMN_1782939	4	-0.098	0.934327	0.048957	0.412278	0.188	1.13918	0.009522	0.061959	0.04	1.02811	0.474509	0.842519	0.286	1.21926	0.001548	0.036528
ALCAM	NM_001627.2	2070575	ILMN_1670870	3	-1.101	0.466193	0.001539	0.066353	-0.8	0.574349	0	2.3e-05	-0.28	0.823591	0.033493	0.236237	0.301	1.232	0.210111	0.669311
ALDH16A1	NM_153329.2	940441	ILMN_2051381	19	-0.014	0.990343	0.879784	0.977827	-0.306	0.808881	0.00155	0.014248	-0.175	0.885768	0.007721	0.085199	-0.292	0.816769	0.024069	0.217591
ALDH18A1	NM_002860.3	2370255	ILMN_2302716	10	0.283	1.21672	0.098975	0.542809	0.245	1.18509	0.006901	0.047779	0.045	1.03168	0.578133	0.887684	-0.038	0.974004	0.786054	0.96078
ALDH1A1	NM_000689.3	1070477	ILMN_2096372	9	-0.052	0.964598	0.290872	0.763827	-0.109	0.927231	0.079689	0.314911	-0.039	0.973329	0.459206	0.833972	-0.058	0.960595	0.310436	0.763866
ALDH1A1	NM_000689.3	6510754	ILMN_1709348	9	0.011	1.00765	0.885261	0.979041	0.035	1.02456	0.564026	0.850149	0.019	1.01326	0.769762	0.947387	0.024	1.01677	0.75595	0.95553
ALDH1A2	NM_170696.1	5700102	ILMN_2383707	15	-0.037	0.97468	0.487704	0.874613	-0.036	0.975355	0.484973	0.805143	0.004	1.00278	0.944842	0.989023	0.001	1.00069	0.990705	0.998814
ALDH1A2	NM_170697.1	510687	ILMN_1748538	15	0.051	1.03598	0.421259	0.842981	0.116	1.08373	0.023704	0.128612	0.074	1.05263	0.153417	0.556702	0.065	1.04608	0.316436	0.768957
ALDH1A3	NM_000693.2	2360551	ILMN_1807439	15	0.096	1.06881	0.493237	0.877935	0.595	1.51047	0.002625	0.021909	0.715	1.64148	0.000498	0.011889	0.499	1.41323	0.003611	0.063829
ALDH1A3	NM_000693.1	4920148	ILMN_2139970	15	0.415	1.3333	0.090728	0.526566	0.997	1.99585	0.000828	0.008555	0.804	1.74594	0.004567	0.058063	0.582	1.49692	0.004092	0.069283
ALDH1B1	NM_000692.3	1240379	ILMN_2150894	9	0.04	1.02811	0.719449	0.944293	0.227	1.1704	0.007431	0.050714	0.088	1.0629	0.295026	0.725214	0.187	1.13839	0.107408	0.506423
ALDH1B1	NM_000692.3	2650204	ILMN_1675398	9	-0.134	0.911301	0.233786	0.720292	0.066	1.04681	0.182236	0.519571	0.116	1.08373	0.037823	0.255192	0.2	1.1487	0.087566	0.459725
ALDH1L1	NM_012190.2	6660341	ILMN_1802167	3	0.123	1.089	0.140148	0.613842	0.146	1.1065	0.009917	0.063995	0.066	1.04681	0.280011	0.712029	0.024	1.01677	0.751636	0.954307
ALDH1L2	XM_927536.1	1980747	ILMN_1736539	12	-0.029	0.980099	0.568119	0.904104	0.028	1.0196	0.575392	0.854641	-0.022	0.984866	0.737666	0.939544	0.057	1.0403	0.311573	0.764611
ALDH1L2	NM_001034173.1	4250411	ILMN_2182980	12	0.018	1.01255	0.688414	0.937701	-0.017	0.988286	0.75986	0.931619	0.075	1.05336	0.271798	0.704309	-0.034	0.976709	0.499777	0.871757
ALDH2	NM_000690.2	840253	ILMN_1793859	12	-0.186	0.87904	0.059681	0.447546	-0.105	0.929805	0.173529	0.506574	0.227	1.1704	0.009978	0.101649	0.081	1.05775	0.233401	0.69436
ALDH3A1	NM_000691.3	5560369	ILMN_1702503	17	-0.246	0.843231	0.007408	0.16003	-0.094	0.936921	0.317621	0.67988	0.345	1.27015	0.000967	0.019015	0.151	1.11034	0.105392	0.502255
ALDH3A2	NM_000382.2	1690608	ILMN_1794825	17	-0.352	0.783497	0.001477	0.064712	-0.421	0.746907	0.000207	0.002787	-0.647	0.638607	1.9e-05	0.001348	-0.069	0.953299	0.479209	0.860619
ALDH3A2	NM_001031806.1	3120196	ILMN_2401641	17	0.046	1.0324	0.837048	0.970477	-0.138	0.908778	0.189696	0.530732	-0.199	0.871154	0.061204	0.343103	-0.184	0.880259	0.390098	0.816328
ALDH3A2	NM_001031806.1	460746	ILMN_1667564	17	-0.21	0.864537	0.021966	0.282384	-0.066	0.955283	0.355908	0.713837	0.237	1.17854	0.006755	0.076995	0.144	1.10496	0.091476	0.469836
ALDH3B1	NM_000694.2	2970356	ILMN_1728662	11	-0.095	0.936272	0.061479	0.451765	-0.298	0.813379	0.000409	0.004798	-0.213	0.862741	0.008118	0.088187	-0.202	0.869345	0.010644	0.129835
ALDH3B1	NM_000694.2	1850440	ILMN_1727965	11	-0.024	0.983502	0.747922	0.950177	-0.009	0.993781	0.889971	0.97078	0.034	1.02385	0.663125	0.916614	0.015	1.01045	0.761044	0.956231
ALDH3B2	NM_001031615.1	2360201	ILMN_2363880	11	-0.017	0.988286	0.707156	0.941414	0.059	1.04174	0.449539	0.783307	-0.062	0.957935	0.374214	0.785697	0.076	1.05409	0.374444	0.807812
ALDH3B2	NM_001031615.1	4070647	ILMN_1763666	11	0.026	1.01819	0.629122	0.92235	0.065	1.04608	0.234787	0.591726	-0.016	0.988971	0.725109	0.936209	0.039	1.0274	0.534801	0.886521
ALDH3B2	NM_000695.3	2970039	ILMN_1761514	11	-0.034	0.976709	0.581934	0.908762	-0.033	0.977386	0.543971	0.839615	0.024	1.01677	0.670114	0.918485	0.001	1.00069	0.978888	0.996563
ALDH4A1	NM_170726.1	6220360	ILMN_2406557	1	0.034	1.02385	0.732918	0.947267	-0.074	0.95	0.238805	0.596944	-0.132	0.912565	0.028618	0.212367	-0.107	0.928517	0.332495	0.78155
ALDH4A1	NM_003748.2	2640273	ILMN_1696099	1	-0.12	0.920188	0.064419	0.46049	-0.192	0.875391	0.006789	0.04715	-0.027	0.981459	0.642064	0.910024	-0.072	0.951318	0.119569	0.530486
ALDH4A1	NM_170726.1	1470427	ILMN_1656368	1	0.178	1.13131	0.162606	0.641905	-0.046	0.968618	0.423778	0.765195	0.054	1.03814	0.271097	0.703637	-0.223	0.856782	0.097471	0.484112
ALDH4A1	NM_003748.2	160343	ILMN_2244841	1	0.053	1.03742	0.546008	0.894967	-0.089	0.940174	0.148883	0.466232	0.063	1.04464	0.342378	0.763144	-0.142	0.906262	0.097721	0.484905
ALDH5A1	NM_001080.3	7040327	ILMN_2372398	6	0.019	1.01326	0.889285	0.979723	-0.136	0.910039	0.057667	0.252206	-0.063	0.957271	0.424231	0.814047	-0.155	0.898132	0.27897	0.739065
ALDH5A1	NM_001080.3	2640274	ILMN_2372403	6	0.041	1.02883	0.537456	0.891889	-0.026	0.98214	0.64477	0.88664	-0.039	0.973329	0.455313	0.832013	-0.067	0.954621	0.339643	0.786193
ALDH6A1	NM_005589.2	5820373	ILMN_1785284	14	-0.428	0.743291	0.000554	0.038601	-0.654	0.635516	3e-06	0.00013	-0.344	0.787854	0.000646	0.01433	-0.226	0.855002	0.010579	0.129427
ALDH6A1	NM_005589.2	7100274	ILMN_2096985	14	-0.24	0.846745	0.001024	0.053248	-0.446	0.734075	1.8e-05	0.000446	-0.243	0.844986	0.00081	0.016813	-0.206	0.866938	0.006763	0.095778
ALDH7A1	NM_001182.2	4150544	ILMN_1763461	5	-0.043	0.970634	0.776968	0.955309	-0.068	0.95396	0.264969	0.626721	0.066	1.04681	0.39051	0.795506	-0.025	0.982821	0.868878	0.977635
ALDH7A1	NM_001182.2	70102	ILMN_1687508	5	0.037	1.02598	0.763617	0.953389	-0.164	0.892547	0.11102	0.390753	0.115	1.08298	0.29168	0.722089	-0.2	0.870551	0.034048	0.272136
ALDH8A1	NM_022568.2	6370138	ILMN_1699258	6	-0.019	0.986917	0.665583	0.931467	0.042	1.02954	0.423078	0.764881	0.015	1.01045	0.771411	0.948291	0.062	1.04391	0.246175	0.709563
ALDH8A1	NM_022568.2	7400541	ILMN_1681938	6	-0.05	0.965936	0.370181	0.814593	0.008	1.00556	0.871059	0.965764	0.038	1.02669	0.478451	0.844539	0.058	1.04102	0.351765	0.793918
ALDH8A1	NM_022568.2	2100546	ILMN_2365176	6	0.119	1.08598	0.092678	0.528933	0.16	1.11729	0.040798	0.195687	0.165	1.12117	0.011501	0.112018	0.041	1.02883	0.60783	0.914606
ALDH9A1	NM_000696.3	1820044	ILMN_1761804	1	-0.173	0.886996	0.125078	0.588923	-0.685	0.622006	0	1.6e-05	-0.436	0.739181	0.000312	0.008446	-0.512	0.70125	0.001339	0.033656
ALDOA	NM_184043.1	2850255	ILMN_2251253	16	-0.014	0.990343	0.859909	0.974803	-0.137	0.909408	0.044496	0.208894	-0.224	0.856188	0.005682	0.067906	-0.122	0.918913	0.079476	0.436788
ALDOA	NM_000034.2	2470341	ILMN_1681374	16	-0.046	0.968618	0.374876	0.818057	-0.005	0.99654	0.911009	0.977601	-0.017	0.988286	0.767564	0.946721	0.041	1.02883	0.433637	0.840931
ALDOA	NM_184043.1	6590253	ILMN_1741148	16	-0.272	0.828171	0.071711	0.482574	0.013	1.00905	0.896946	0.972678	0.086	1.06142	0.423027	0.813349	0.284	1.21757	0.013665	0.153568
ALDOA	NM_184041.1	2640088	ILMN_1736700	16	-0.098	0.934327	0.309225	0.777053	0.094	1.06733	0.350892	0.709159	0.165	1.12117	0.080625	0.403086	0.192	1.14235	0.091149	0.469265
ALDOB	NM_000035.2	650427	ILMN_1747716	9	0.076	1.05409	0.204904	0.692442	-0.022	0.984866	0.667591	0.895598	-0.016	0.988971	0.781306	0.951232	-0.098	0.934327	0.061883	0.382737
ALDOC	NM_005165.2	7330544	ILMN_1755974	17	0.129	1.09354	0.64685	0.92771	-0.058	0.960595	0.657292	0.891699	-0.151	0.900626	0.422813	0.813256	-0.187	0.87843	0.438939	0.844028
ALG1	NM_019109.3	5560670	ILMN_1718093	16	-0.102	0.93174	0.112266	0.568896	0.044	1.03097	0.34728	0.706205	-0.033	0.977386	0.645935	0.911526	0.146	1.1065	0.041534	0.305343
ALG10	NM_032834.3	3140711	ILMN_3243268	12	-0.059	0.959929	0.299903	0.770533	-0.068	0.95396	0.300115	0.662831	-0.122	0.918913	0.026007	0.199054	-0.009	0.993781	0.907639	0.985043
ALG10B	NM_001013620.3	5310524	ILMN_3251482	12	0.017	1.01185	0.866146	0.975964	-0.148	0.902501	0.065709	0.276213	-0.154	0.898755	0.061568	0.344082	-0.165	0.891929	0.073174	0.418791
ALG10B	NM_001013620.3	3060196	ILMN_1666325	12	-0.103	0.931095	0.275717	0.753471	-0.213	0.862741	0.006981	0.04824	-0.088	0.940826	0.13091	0.518208	-0.11	0.926588	0.296378	0.753715
ALG10B	NM_001013620.3	1110241	ILMN_1730304	12	0.041	1.02883	0.391225	0.826332	-0.075	0.949342	0.152523	0.47244	-0.019	0.986917	0.665105	0.917147	-0.117	0.922103	0.054444	0.357427
ALG11	NM_001004127.1	5550647	ILMN_2120982	13	-0.028	0.980779	0.510289	0.88266	-0.03	0.97942	0.515429	0.823595	-0.043	0.970634	0.363644	0.778394	-0.002	0.998615	0.953607	0.992617
ALG11	NM_001004127.1	4210358	ILMN_1660856	13	-0.093	0.937571	0.086332	0.517404	0.23	1.17283	0.000897	0.009148	0.16	1.11729	0.042233	0.273479	0.323	1.25093	0.000237	0.01135
ALG12	NM_024105.3	6940735	ILMN_1743995	22	-0.054	0.963262	0.411335	0.836625	-0.064	0.956608	0.312495	0.675523	-0.022	0.984866	0.737699	0.939562	-0.01	0.993092	0.829556	0.970415
ALG13	NM_018466.2	730520	ILMN_2147503	X	-0.266	0.831622	0.005892	0.140429	-0.088	0.940826	0.218967	0.572575	0.014	1.00975	0.831365	0.964437	0.179	1.1321	0.021251	0.202677
ALG13	NM_018466.3	6660411	ILMN_1761456	X	-0.045	0.96929	0.629635	0.922507	-0.055	0.962594	0.6463	0.887266	0.196	1.14552	0.01702	0.14762	-0.009	0.993781	0.94669	0.991059
ALG14	NM_144988.2	50128	ILMN_1743635	1	-0.04	0.972655	0.499041	0.879311	0.016	1.01115	0.770818	0.935851	-0.028	0.980779	0.649892	0.912947	0.056	1.03958	0.385124	0.814189
ALG14	NM_144988.2	2340524	ILMN_2191822	1	-0.07	0.952638	0.294771	0.766569	-0.019	0.986917	0.726593	0.919975	0.021	1.01466	0.706139	0.931651	0.051	1.03598	0.473346	0.858171
ALG1L	NM_001015050.1	2900681	ILMN_1782084	3	-0.069	0.953299	0.18269	0.669873	0.122	1.08824	0.039675	0.19178	0.391	1.3113	3.3e-05	0.00189	0.191	1.14155	0.004119	0.069561
ALG1L	NM_001015050.1	1440474	ILMN_2131293	3	-0.084	0.943438	0.169199	0.650874	0.203	1.15109	0.036057	0.178346	0.743	1.67365	0	0.000117	0.287	1.2201	0.014018	0.155918
ALG2	NM_033087.3	1990021	ILMN_1737945	9	-0.018	0.987601	0.815367	0.965686	-0.014	0.990343	0.828931	0.954324	-0.003	0.997923	0.963743	0.993133	0.004	1.00278	0.938701	0.990163
ALG2	NM_197973.2	4540025	ILMN_1722688	9	0.067	1.04754	0.305506	0.774335	0.129	1.09354	0.053336	0.23858	0.045	1.03168	0.481984	0.846488	0.062	1.04391	0.163499	0.610982
ALG3	NM_005787.4	2650167	ILMN_1711886	3	0.253	1.19168	0.212833	0.700969	-0.139	0.908148	0.229049	0.584593	-0.355	0.78187	0.019474	0.162026	-0.392	0.762072	0.02973	0.249865
ALG3	NM_001006940.1	2140427	ILMN_1806845	3	0.534	1.44794	8.6e-05	0.013921	0.337	1.26313	2.7e-05	0.000587	-0.086	0.942131	0.255267	0.687337	-0.197	0.872363	0.022875	0.211522
ALG5	NM_013338.3	6370113	ILMN_1664449	13	-0.233	0.850864	0.212494	0.700969	-0.089	0.940174	0.194526	0.538324	0.132	1.09581	0.091471	0.431775	0.144	1.10496	0.395664	0.819388
ALG6	NM_013339.2	6960243	ILMN_1771411	1	-0.043	0.970634	0.685124	0.937144	-0.22	0.858565	0.064853	0.273717	-0.417	0.74898	0.001713	0.028487	-0.177	0.88454	0.165098	0.613204
ALG8	NM_024079.4	4850632	ILMN_1685413	11	-0.047	0.967947	0.679926	0.935847	-0.288	0.819037	0.011311	0.0711	-0.351	0.78404	0.002131	0.03323	-0.241	0.846159	0.036571	0.28348
ALG8	NM_001007027.2	3610291	ILMN_2271014	11	0.058	1.04102	0.299816	0.770476	-0.014	0.990343	0.81237	0.948917	0.06	1.04247	0.28939	0.720399	-0.071	0.951978	0.179693	0.632051
ALG8	NM_001007027.2	2970296	ILMN_2365686	11	-0.178	0.883928	0.100912	0.548038	-0.707	0.612593	2.6e-05	0.00057	-0.4	0.757858	0.000351	0.009197	-0.528	0.693515	0.001074	0.029129
ALG9	NM_001077692.1	450204	ILMN_1732809	11	0.052	1.0367	0.531539	0.890052	-0.024	0.983502	0.769708	0.935517	-0.057	0.961261	0.663778	0.916785	-0.077	0.948027	0.329936	0.78008
ALK	NM_004304.3	6250431	ILMN_1753135	2	-0.033	0.977386	0.726343	0.946424	0.02	1.01396	0.820139	0.95075	0.066	1.04681	0.436823	0.82192	0.053	1.03742	0.591718	0.909573
ALKBH1	NM_006020.2	3360056	ILMN_1758038	14	-0.143	0.905634	0.077484	0.497637	0.328	1.25527	0.000577	0.006361	0.286	1.21926	0.003172	0.04422	0.471	1.38607	1.5e-05	0.002495
ALKBH1	NM_006020.2	1780020	ILMN_2276750	14	-0.055	0.962594	0.269165	0.747907	0.06	1.04247	0.280341	0.642246	-0.009	0.993781	0.860269	0.970836	0.115	1.08298	0.040574	0.301636
ALKBH1	NM_006020.2	7160167	ILMN_2375973	14	0.064	1.04536	0.45415	0.860913	0.444	1.36037	2.9e-05	0.000618	0.37	1.29235	0.000829	0.017087	0.38	1.30134	0.003417	0.061486
ALKBH2	NM_001001655.1	1340537	ILMN_1690252	12	0.567	1.48144	0.007028	0.154818	0.756	1.6888	5.2e-05	0.000965	0.356	1.27987	0.014384	0.131848	0.188	1.13918	0.182861	0.635726
ALKBH3	NM_139178.1	4610369	ILMN_2134062	11	0.03	1.02101	0.580908	0.908332	-0.054	0.963262	0.288265	0.650503	-0.107	0.928517	0.067009	0.362877	-0.085	0.942785	0.115349	0.522374
ALKBH4	NM_017621.2	1780379	ILMN_1805673	7	0.07	1.04972	0.400174	0.830642	0.176	1.12975	0.009656	0.062716	-0.019	0.986917	0.739214	0.939762	0.106	1.07624	0.187309	0.641101
ALKBH5	NM_017758.3	1400209	ILMN_1657283	17	0.376	1.29774	0.0648	0.461543	0.504	1.41814	0.000258	0.003312	0.064	1.04536	0.567892	0.884991	0.128	1.09278	0.415725	0.830431
ALKBH6	NM_198867.1	670360	ILMN_1808792	19	-0.053	0.96393	0.723582	0.945639	0.001	1.00069	0.985823	0.996098	0.012	1.00835	0.841179	0.966767	0.054	1.03814	0.720792	0.946622
ALKBH7	NM_032306.2	3310324	ILMN_1761764	19	0.024	1.01677	0.791515	0.958752	0.021	1.01466	0.692857	0.906833	0.079	1.05629	0.157852	0.56432	-0.003	0.997923	0.975851	0.995843
ALKBH8	NM_138775.1	6420044	ILMN_1779190	11	-0.031	0.978742	0.659912	0.92982	0.175	1.12896	0.035493	0.176165	0.015	1.01045	0.857762	0.970273	0.205	1.15269	0.012852	0.147858
ALLC	NM_018436.3	4070601	ILMN_1681046	2	-0.028	0.980779	0.649164	0.928123	-0.051	0.965267	0.294352	0.656357	-0.031	0.978742	0.552671	0.878643	-0.022	0.984866	0.709562	0.94408
ALLC	NM_199232.1	2100465	ILMN_1796946	2	0.018	1.01255	0.675484	0.934725	0.026	1.01819	0.606649	0.869519	0.016	1.01115	0.718495	0.934851	0.008	1.00556	0.868786	0.977635
ALLC	NM_018436.3	4060639	ILMN_1784583	2	-0.005	0.99654	0.937045	0.989861	0.068	1.04826	0.208639	0.558527	0.021	1.01466	0.68862	0.925936	0.073	1.0519	0.229419	0.689146
ALMS1	NM_015120.2	5130736	ILMN_1709474	2	0.018	1.01255	0.71978	0.944394	-0.136	0.910039	0.028279	0.147892	-0.121	0.91955	0.050665	0.306791	-0.154	0.898755	0.015102	0.16304
ALMS1P	NR_003683.1	7210050	ILMN_3237132	2	0.004	1.00278	0.952221	0.991884	-0.04	0.972655	0.438406	0.775099	0.057	1.0403	0.385458	0.792106	-0.044	0.969962	0.519159	0.880249
ALOX12	NM_000697.2	6040259	ILMN_1713731	17	-0.084	0.943438	0.107825	0.560568	-0.037	0.97468	0.473174	0.797657	-0.071	0.951978	0.179615	0.597005	0.046	1.0324	0.377018	0.809881
ALOX12B	NM_001139.2	7510671	ILMN_1692332	17	0.119	1.08598	0.147226	0.62315	0.032	1.02243	0.570788	0.852613	-0.078	0.94737	0.204553	0.628282	-0.087	0.941478	0.206326	0.665078
ALOX12P2	NR_002710.2	1770630	ILMN_2137544	17	-0.018	0.987601	0.770872	0.954139	-0.016	0.988971	0.789184	0.941591	-0.023	0.984184	0.695259	0.929133	0.002	1.00139	0.967558	0.99446
ALOX12P2	XR_000541.1	5130427	ILMN_1735987	17	0.001	1.00069	0.981367	0.996358	0.034	1.02385	0.481727	0.802703	0.01	1.00696	0.839353	0.96615	0.033	1.02314	0.51042	0.876611
ALOX15	XM_001131480.1	20397	ILMN_1676042		0.038	1.02669	0.409518	0.83592	-0.021	0.985549	0.645921	0.887035	-0.004	0.997231	0.937177	0.987879	-0.058	0.960595	0.223076	0.683321
ALOX15	NM_001140.3	1450719	ILMN_1729320	17	-0.037	0.97468	0.497547	0.878725	0.056	1.03958	0.349034	0.707945	0.029	1.0203	0.546763	0.875554	0.092	1.06585	0.196708	0.653711
ALOX15	NM_001140.3	5220278	ILMN_2403534	17	0.118	1.08523	0.058723	0.444636	0.098	1.07029	0.063979	0.271209	0.052	1.0367	0.350192	0.768348	-0.021	0.985549	0.707779	0.943942
ALOX15	XM_001131480.1	1230722	ILMN_1783443		-0.001	0.999307	0.974721	0.995558	0.079	1.05629	0.099286	0.365016	0.067	1.04754	0.168119	0.581345	0.08	1.05702	0.090676	0.468096
ALOX15B	NM_001141.2	2900639	ILMN_1751975	17	-0.013	0.99103	0.837829	0.970684	-0.005	0.99654	0.92908	0.982605	-0.016	0.988971	0.727355	0.936909	0.008	1.00556	0.905609	0.984922
ALOX15B	NM_001141.2	430152	ILMN_2276904	17	0.034	1.02385	0.499819	0.879497	0.044	1.03097	0.40107	0.750815	0.002	1.00139	0.962887	0.992953	0.01	1.00696	0.859552	0.975962
ALOX15B	NM_001039131.1	5810154	ILMN_2393149	17	0.027	1.01889	0.627355	0.922013	-0.037	0.97468	0.480616	0.801897	0.024	1.01677	0.671746	0.918885	-0.064	0.956608	0.205698	0.664153
ALOX5	XM_937295.1	4560670	ILMN_1651466		-0.065	0.955945	0.21656	0.704386	0.042	1.02954	0.393784	0.744454	0.025	1.01748	0.609316	0.899604	0.107	1.07699	0.059644	0.375258
ALOX5	NM_000698.2	2510037	ILMN_1792150	10	-0.026	0.98214	0.566676	0.903367	0.045	1.03168	0.408864	0.755922	0.088	1.0629	0.133168	0.52316	0.071	1.05044	0.205222	0.663633
ALOX5	XM_001127464.1	1780273	ILMN_1680996		0.639	1.55725	0.002509	0.088048	0.733	1.66209	0	2e-05	0.285	1.21841	0.000802	0.016711	0.094	1.06733	0.539167	0.888953
ALOX5AP	NM_001629.2	3930343	ILMN_1797875	13	-0.015	0.989657	0.818364	0.966728	-0.002	0.998615	0.973562	0.993187	0.011	1.00765	0.87117	0.973288	0.013	1.00905	0.779158	0.959289
ALOXE3	NM_021628.1	990685	ILMN_1678255	17	0.033	1.02314	0.561713	0.901503	-0.009	0.993781	0.861459	0.963393	0.011	1.00765	0.843344	0.967123	-0.041	0.971981	0.399829	0.821967
ALPI	NM_001631.2	2570162	ILMN_1752669	2	0.077	1.05482	0.279832	0.75605	0.041	1.02883	0.523206	0.82796	-0.022	0.984866	0.73987	0.939863	-0.036	0.975355	0.472044	0.85766
ALPK1	NM_025144.2	540390	ILMN_2078697	4	-0.132	0.912565	0.113203	0.57057	-0.313	0.804966	0.000126	0.001886	-0.15	0.90125	0.047559	0.295015	-0.181	0.882091	0.026465	0.231146
ALPK2	NM_052947.3	5270519	ILMN_1811238	18	0.028	1.0196	0.625503	0.92156	-0.031	0.978742	0.567626	0.851299	0.069	1.04899	0.29018	0.721124	-0.059	0.959929	0.21365	0.672952
ALPK3	NM_020778.3	5810017	ILMN_1734630	15	0.071	1.05044	0.22744	0.7146	-0.035	0.976032	0.43011	0.769342	-0.044	0.969962	0.376206	0.787155	-0.106	0.929161	0.087365	0.459098
ALPL	NM_000478.3	6100356	ILMN_1701603	1	0.176	1.12975	0.003617	0.106658	0.231	1.17365	0.000996	0.00996	-0.065	0.955945	0.195949	0.61755	0.055	1.03886	0.315922	0.768695
ALPP	NM_001632.3	2600133	ILMN_1693789	2	0.477	1.39185	0.001499	0.065011	1.642	3.12098	0	3e-06	0.061	1.04319	0.525758	0.867533	1.165	2.24233	3e-06	0.001093
ALPPL2	NM_031313.1	2490376	ILMN_1801851	2	0.031	1.02172	0.499569	0.879497	0.055	1.03886	0.386214	0.738522	0.087	1.06216	0.212428	0.638664	0.025	1.01748	0.718313	0.945665
ALS2	NM_020919.2	2140156	ILMN_1750256	2	0.041	1.02883	0.79909	0.961254	-0.003	0.997923	0.95063	0.987698	-0.09	0.939523	0.229123	0.659366	-0.044	0.969962	0.775209	0.958099
ALS2CL	NM_147129.2	4570630	ILMN_1702322	3	0.049	1.03455	0.430212	0.848196	0.043	1.03025	0.43015	0.769342	0.049	1.03455	0.373456	0.785222	-0.006	0.99585	0.920415	0.987504
ALS2CL	NM_147129.2	4060037	ILMN_1700596	3	0.023	1.01607	0.638773	0.925546	0.08	1.05702	0.113932	0.396458	0.061	1.04319	0.230164	0.660729	0.057	1.0403	0.277587	0.73809
ALS2CL	NM_182775.1	4760487	ILMN_1690636	3	0.099	1.07103	0.06135	0.451339	0.039	1.0274	0.446696	0.781259	0.093	1.06659	0.068494	0.367116	-0.059	0.959929	0.304882	0.759883
ALS2CR11	NM_152525.3	1450431	ILMN_1792449	2	0.043	1.03025	0.474309	0.869137	0.021	1.01466	0.658351	0.892062	0.06	1.04247	0.303129	0.732716	-0.022	0.984866	0.691044	0.939859
ALS2CR12	NM_139163.1	2100626	ILMN_1765674	2	0.012	1.00835	0.782279	0.956761	-0.001	0.999307	0.991387	0.997701	0.005	1.00347	0.911571	0.982044	-0.012	0.991717	0.788139	0.961075
ALS2CR14	NM_178231.1	6940709	ILMN_1787314	2	0.007	1.00486	0.92561	0.987284	0.061	1.04319	0.271919	0.633011	-0.048	0.967276	0.429514	0.817774	0.055	1.03886	0.460137	0.852863
ALS2CR16	XM_001134431.1	50132	ILMN_1663897	2	0.002	1.00139	0.972185	0.995109	-0.059	0.959929	0.315717	0.678186	-0.008	0.99447	0.88051	0.975781	-0.061	0.958599	0.315772	0.768695
ALS2CR4	NM_001044385.1	50348	ILMN_1800958	2	0.018	1.01255	0.660089	0.92982	0.358	1.28165	7.3e-05	0.001242	0.492	1.40639	9.3e-05	0.003696	0.34	1.26576	0.000309	0.013377
ALS2CR8	NM_024744.13	2100286	ILMN_1760889		-0.015	0.989657	0.824165	0.967693	0.003	1.00208	0.960821	0.990216	-0.004	0.997231	0.945617	0.989122	0.018	1.01255	0.786963	0.960834
ALX1	NM_006982.2	110521	ILMN_3236443	12	0.122	1.08824	0.079106	0.501492	0.04	1.02811	0.496877	0.812043	-0.03	0.97942	0.630803	0.90662	-0.083	0.944092	0.209793	0.668999
ALX3	NM_006492.1	6250762	ILMN_1729325	1	0.023	1.01607	0.681873	0.936092	0.049	1.03455	0.397797	0.747959	0.035	1.02456	0.545215	0.875091	0.026	1.01819	0.654913	0.929877
ALX3	NM_006492.2	3520619	ILMN_2191902	1	0.013	1.00905	0.782012	0.956761	0.047	1.03311	0.345725	0.704934	0.04	1.02811	0.451597	0.830142	0.034	1.02385	0.512311	0.877341
ALX4	NM_021926.2	4230358	ILMN_1803384	11	0.009	1.00626	0.834449	0.969929	-0.029	0.980099	0.530862	0.832555	-0.065	0.955945	0.177135	0.59411	-0.038	0.974004	0.42392	0.836128
AMAC1	NM_152462.1	1690187	ILMN_1797432	17	-0.003	0.997923	0.945424	0.991073	-0.023	0.984184	0.62551	0.878194	0.056	1.03958	0.297391	0.727454	-0.02	0.986233	0.659517	0.931078
AMAC1L1	XM_928960.2	2850278	ILMN_1794728	18	0.005	1.00347	0.932336	0.988717	0.039	1.0274	0.59394	0.863722	0.02	1.01396	0.740086	0.939944	0.034	1.02385	0.600497	0.912721
AMAC1L2	NM_054028.1	2600022	ILMN_1715988	8	-0.003	0.997923	0.958068	0.992827	-0.013	0.99103	0.802859	0.946041	-0.015	0.989657	0.772139	0.948567	-0.01	0.993092	0.865996	0.977142
AMAC1L2	NM_054028.1	6400661	ILMN_1713315	8	-0.033	0.977386	0.528343	0.88953	0.023	1.01607	0.641669	0.885278	0.008	1.00556	0.871408	0.973288	0.056	1.03958	0.279757	0.739995
AMAC1L2	NM_054028.1	6550360	ILMN_2194619	8	0.018	1.01255	0.765487	0.953613	0.035	1.02456	0.568336	0.85156	0.073	1.0519	0.254885	0.687149	0.017	1.01185	0.727578	0.948956
AMAC1L3	NM_001102614.1	5050167	ILMN_3246673	17	-0.048	0.967276	0.419216	0.841685	-0.002	0.998615	0.971907	0.992487	-0.016	0.988971	0.78767	0.953538	0.046	1.0324	0.347861	0.791614
AMACR	NM_014324.4	520544	ILMN_1759670	5	-0.078	0.94737	0.178384	0.664432	-0.068	0.95396	0.239064	0.597163	-0.059	0.959929	0.324751	0.748634	0.01	1.00696	0.852239	0.974309
AMACR	NM_203382.1	3130154	ILMN_2367172	5	-0.056	0.961927	0.247969	0.731571	-0.027	0.981459	0.695068	0.907728	-0.009	0.993781	0.853888	0.969383	0.029	1.0203	0.695386	0.940628
AMACR	NM_203382.1	5870286	ILMN_1792741	5	-0.007	0.99516	0.865663	0.975964	-0.037	0.97468	0.437023	0.774145	0.018	1.01255	0.745392	0.941973	-0.03	0.97942	0.493706	0.868585
AMBN	NM_016519.4	6400438	ILMN_1751092	4	0	1	0.998613	0.999868	-0.051	0.965267	0.49188	0.80888	-0.059	0.959929	0.432471	0.819029	-0.051	0.965267	0.338229	0.784952
AMBN	XM_001127613.1	5960743	ILMN_1688019		-0.019	0.986917	0.714616	0.943047	0.008	1.00556	0.872458	0.966104	-0.023	0.984184	0.657137	0.915262	0.028	1.0196	0.561813	0.898102
AMBN	NM_016519.4	6450037	ILMN_1697611	4	-0.001	0.999307	0.991536	0.998378	-0.002	0.998615	0.961027	0.990237	0.038	1.02669	0.452718	0.830719	-0.002	0.998615	0.972421	0.995419
AMBN	NM_016519.4	1190678	ILMN_1794384	4	0.035	1.02456	0.477605	0.870426	0.015	1.01045	0.790456	0.941715	0.077	1.05482	0.140076	0.535412	-0.02	0.986233	0.732473	0.949963
AMBP	NM_001633.2	4900433	ILMN_1695446	9	-0.002	0.998615	0.961781	0.993164	0.024	1.01677	0.640549	0.884942	0.024	1.01677	0.609672	0.899687	0.026	1.01819	0.599208	0.912279
AMBRA1	NM_017749.2	1110129	ILMN_1662681	11	0.029	1.0203	0.533095	0.890445	0.069	1.04899	0.326224	0.687893	-0.046	0.968618	0.386615	0.792771	0.04	1.02811	0.573985	0.903215
AMD1	NM_001033059.1	50050	ILMN_1788462	6	-0.069	0.953299	0.583222	0.909036	-0.281	0.82302	0.002227	0.019137	-0.303	0.810565	0.001757	0.028979	-0.212	0.86334	0.119787	0.530778
AMD1	NM_001634.4	3870619	ILMN_1667994	6	0.055	1.03886	0.562017	0.901721	0.037	1.02598	0.560664	0.848194	-0.107	0.928517	0.396625	0.799767	-0.018	0.987601	0.853783	0.97471
AMDHD1	NM_152435.1	6520112	ILMN_1788239	12	-0.082	0.944747	0.321228	0.784161	-0.122	0.918913	0.082863	0.323014	0.063	1.04464	0.352254	0.770111	-0.039	0.973329	0.579588	0.905212
AMDHD2	NM_015944.2	6110280	ILMN_1695759	16	0.052	1.0367	0.510711	0.88287	-0.109	0.927231	0.203793	0.551389	-0.014	0.990343	0.865874	0.972202	-0.162	0.893785	0.066679	0.400039
AMELX	NM_001142.2	5720730	ILMN_2397406	X	-0.022	0.984866	0.744047	0.94944	-0.028	0.980779	0.643836	0.886197	0.049	1.03455	0.422602	0.813256	-0.005	0.99654	0.917965	0.987128
AMELY	NM_001143.1	7040402	ILMN_1727258	Y	0.046	1.0324	0.365621	0.811151	-0.005	0.99654	0.933341	0.983484	0.045	1.03168	0.43517	0.82107	-0.051	0.965267	0.353247	0.794645
AMFR	NM_001144.4	1400672	ILMN_1723116	16	-0.125	0.917004	0.079082	0.501492	0.027	1.01889	0.649682	0.888772	-0.072	0.951318	0.191534	0.613081	0.152	1.11111	0.05925	0.374014
AMFR	NM_001144.4	4610594	ILMN_1666258	16	-0.045	0.96929	0.579461	0.907878	-0.022	0.984866	0.715873	0.91571	0.092	1.06585	0.16114	0.569406	0.023	1.01607	0.736131	0.951265
AMH	NM_000479.2	3780156	ILMN_1660995	19	-0.18	0.882703	0.00428	0.11677	-0.164	0.892547	0.009691	0.062866	-0.143	0.905634	0.03021	0.220521	0.016	1.01115	0.749131	0.954064
AMHR2	NM_020547.1	5420152	ILMN_1736412	12	-0.045	0.96929	0.348656	0.80057	-0.001	0.999307	0.976419	0.993745	-0.018	0.987601	0.700041	0.930632	0.043	1.03025	0.358598	0.798632
AMICA1	NM_153206.1	1580465	ILMN_1778723	11	-0.026	0.98214	0.515893	0.884912	-0.032	0.978063	0.543154	0.839045	0.043	1.03025	0.348681	0.767478	-0.006	0.99585	0.902804	0.984336
AMIGO1	NM_020703.2	4730598	ILMN_1765460	1	0.015	1.01045	0.773368	0.954188	0.076	1.05409	0.168321	0.4982	0.033	1.02314	0.474536	0.842535	0.061	1.04319	0.302526	0.758367
AMIGO2	NM_181847.3	7100053	ILMN_1725896	12	0.023	1.01607	0.75328	0.951384	-0.007	0.99516	0.897606	0.972904	-0.043	0.970634	0.370687	0.78328	-0.03	0.97942	0.694985	0.940511
AMIGO3	NM_198722.1	3060349	ILMN_1738233	3	0.039	1.0274	0.509009	0.882525	-0.071	0.951978	0.191586	0.533779	0.063	1.04464	0.208676	0.633351	-0.11	0.926588	0.097424	0.484082
AMMECR1	NM_015365.2	2340601	ILMN_1779374	X	-0.084	0.943438	0.34757	0.800465	-0.144	0.905006	0.108696	0.38587	-0.111	0.925946	0.189319	0.610478	-0.059	0.959929	0.565007	0.899226
AMMECR1	NM_015365.2	450176	ILMN_1670506	X	0.016	1.01115	0.773483	0.954188	-0.021	0.985549	0.676691	0.899909	-0.05	0.965936	0.335944	0.758498	-0.036	0.975355	0.534134	0.886377
AMMECR1	NM_001025580.1	7100093	ILMN_2394242	X	-0.054	0.963262	0.360436	0.808111	-0.061	0.958599	0.287952	0.650269	0.016	1.01115	0.849304	0.968495	-0.007	0.99516	0.869305	0.977635
AMMECR1L	NM_031445.2	4900605	ILMN_1727023	2	0.045	1.03168	0.559338	0.901136	0.107	1.07699	0.12414	0.417757	0.01	1.00696	0.876525	0.97463	0.061	1.04319	0.381392	0.811544
AMN	NM_030943.1	1110706	ILMN_1683901	14	0.035	1.02456	0.460595	0.863579	-0.008	0.99447	0.873018	0.96619	0.03	1.02101	0.581937	0.889738	-0.044	0.969962	0.369267	0.805578
AMN1	NM_207337.1	6900044	ILMN_1750880	12	0.154	1.11265	0.004516	0.120503	0.182	1.13446	0.002149	0.018588	-0.051	0.965267	0.274071	0.706092	0.027	1.01889	0.529597	0.884698
AMOT	NM_133265.2	3290646	ILMN_1792409	X	-0.136	0.910039	0.092645	0.528933	-0.215	0.861546	0.005515	0.039723	-0.208	0.865737	0.009991	0.101712	-0.079	0.946714	0.311554	0.764611
AMOTL1	NM_130847.1	2070301	ILMN_1748141	11	-0.075	0.949342	0.158302	0.636531	0.005	1.00347	0.927829	0.982205	-0.031	0.978742	0.515232	0.861356	0.079	1.05629	0.162855	0.61021
AMOTL2	NM_016201.2	6960079	ILMN_1778788	3	0.08	1.05702	0.122873	0.585268	0.087	1.06216	0.124713	0.41897	0.101	1.07252	0.09105	0.430734	0.007	1.00486	0.896719	0.983127
AMPD1	NM_000036.1	6660114	ILMN_1759312	1	0.028	1.0196	0.600071	0.914154	0.039	1.0274	0.476426	0.799701	0.024	1.01677	0.639332	0.909148	0.01	1.00696	0.835516	0.971945
AMPD2	NM_203404.1	1170474	ILMN_1696830	1	0.002	1.00139	0.966896	0.994089	-0.041	0.971981	0.378454	0.731937	-0.032	0.978063	0.493366	0.85152	-0.043	0.970634	0.430065	0.838913
AMPD2	NM_004037.6	70296	ILMN_1701589	1	-0.05	0.965936	0.261167	0.741432	-0.006	0.99585	0.908966	0.976993	-0.017	0.988286	0.739747	0.93986	0.044	1.03097	0.368038	0.804565
AMPD2	NM_139156.2	6940132	ILMN_1786899	1	-0.015	0.989657	0.813252	0.964821	-0.036	0.975355	0.567262	0.851299	0.036	1.02527	0.584445	0.890594	-0.02	0.986233	0.611295	0.915319
AMPD3	NM_000480.2	150504	ILMN_1774447	11	-0.066	0.955283	0.281973	0.758069	-0.051	0.965267	0.256972	0.618795	-0.008	0.99447	0.86683	0.972359	0.015	1.01045	0.805458	0.965709
AMPD3	NM_000480.2	990576	ILMN_1660854	11	-0.05	0.965936	0.494248	0.878159	-0.032	0.978063	0.55702	0.845965	-0.005	0.99654	0.925568	0.985338	0.018	1.01255	0.784887	0.960552
AMPD3	NM_001025390.1	7150390	ILMN_1731223	11	-0.031	0.978742	0.603023	0.915461	-0.073	0.950659	0.266875	0.628845	-0.005	0.99654	0.927154	0.985688	-0.041	0.971981	0.558151	0.896194
AMPD3	NM_001025389.1	2810072	ILMN_1665307	11	-0.028	0.980779	0.542173	0.89371	-0.007	0.99516	0.886051	0.970151	0.002	1.00139	0.970113	0.994052	0.021	1.01466	0.664409	0.932226
AMPH	NM_001635.2	360402	ILMN_1685834	7	0.018	1.01255	0.710738	0.942558	-0.063	0.957271	0.271388	0.632757	-0.074	0.95	0.161078	0.569315	-0.081	0.945402	0.139931	0.57136
AMPH	NM_001635.2	4040152	ILMN_1725297	7	-0.006	0.99585	0.905911	0.983144	-0.03	0.97942	0.561357	0.848555	-0.002	0.998615	0.969346	0.993964	-0.024	0.983502	0.662505	0.931697
AMT	NM_000481.2	940450	ILMN_1665331	3	-0.032	0.978063	0.618228	0.919402	0.058	1.04102	0.382457	0.735469	0.005	1.00347	0.932852	0.987297	0.09	1.06437	0.116956	0.525116
AMTN	NM_212557.2	7320450	ILMN_1713927	4	0.06	1.04247	0.303449	0.773293	0.095	1.06807	0.104431	0.377075	-0.001	0.999307	0.992192	0.99879	0.034	1.02385	0.443284	0.845874
AMY1A	NM_004038.3	1740220	ILMN_2294762	1	-0.373	0.772175	0.001324	0.06154	-0.649	0.637722	0.000179	0.002494	-0.211	0.863938	0.027132	0.204981	-0.276	0.825878	0.059334	0.374139
AMY1A	NM_004038.3	4180626	ILMN_2408219	1	-0.137	0.909408	0.023258	0.290668	0.051	1.03598	0.308128	0.671098	-0.047	0.967947	0.319181	0.744567	0.188	1.13918	0.007577	0.103816
AMY1A	NM_001008221.1	1030161	ILMN_1797796	1	-0.033	0.977386	0.545838	0.894967	0	1	0.99529	0.998904	-0.042	0.971307	0.498291	0.853447	0.034	1.02385	0.499717	0.871757
AMY1B	NM_001008218.1	5550288	ILMN_1726327	1	-0.165	0.891929	0.049944	0.415812	-0.212	0.86334	0.01241	0.07643	-0.156	0.89751	0.0668	0.362202	-0.047	0.967947	0.593317	0.909999
AMY1B	NM_001008218.1	4070164	ILMN_2094261	1	-0.083	0.944092	0.066891	0.46888	-0.081	0.945402	0.134322	0.438576	-0.084	0.943438	0.098982	0.450429	0.003	1.00208	0.955839	0.992957
AMY1B	NM_001008218.1	840500	ILMN_2094262	1	0.008	1.00556	0.860543	0.975172	-0.023	0.984184	0.653351	0.89041	0.025	1.01748	0.603451	0.897512	-0.031	0.978742	0.582239	0.906216
AMY1C	NM_001008219.1	1820068	ILMN_1663313	1	-0.452	0.731029	0.010995	0.196655	-0.429	0.742776	0.001922	0.016922	-0.286	0.820173	0.115961	0.490644	0.024	1.01677	0.793406	0.962488
AMY2A	NM_000699.2	1440403	ILMN_1719031	1	-0.069	0.953299	0.233229	0.72021	-0.102	0.93174	0.082129	0.321422	-0.088	0.940826	0.111654	0.481329	-0.033	0.977386	0.534132	0.886377
AMY2A	NM_000699.2	7380121	ILMN_1751102	1	0.042	1.02954	0.373426	0.817002	-0.005	0.99654	0.914438	0.978395	-0.023	0.984184	0.669452	0.918277	-0.048	0.967276	0.339406	0.785866
AMY2A	NM_000699.2	2450347	ILMN_2131123	1	0.008	1.00556	0.857641	0.974329	-0.017	0.988286	0.771828	0.936164	0.006	1.00417	0.900008	0.979911	-0.025	0.982821	0.687109	0.938767
AMY2A	NM_000699.2	3130296	ILMN_1801303	1	0.122	1.08824	0.13518	0.605481	0.021	1.01466	0.664497	0.894415	0.01	1.00696	0.846456	0.967817	-0.101	0.932386	0.202529	0.66114
AMY2B	NM_020978.3	7000754	ILMN_2073157	1	-0.077	0.948027	0.129677	0.596768	-0.009	0.993781	0.847661	0.959449	-0.058	0.960595	0.231648	0.662685	0.068	1.04826	0.192406	0.648341
AMY2B	NM_020978.3	4810176	ILMN_1694882	1	0.014	1.00975	0.78917	0.958636	0.06	1.04247	0.260741	0.621848	-0.029	0.980099	0.602596	0.897413	0.046	1.0324	0.325947	0.776623
AMZ1	NM_133463.1	4730402	ILMN_1785742	7	0.007	1.00486	0.876615	0.977705	-0.008	0.99447	0.856843	0.962587	0.063	1.04464	0.197437	0.619717	-0.015	0.989657	0.749109	0.954064
AMZ2	NM_001033569.1	510328	ILMN_1801606	17	-0.1	0.933033	0.328984	0.788595	0.495	1.40932	0.000242	0.003154	0.875	1.83401	1e-06	0.000241	0.595	1.51047	0.000207	0.010467
AMZ2	NM_001033574.1	270739	ILMN_2309549	17	-0.032	0.978063	0.681293	0.93608	0.483	1.39765	8.1e-05	0.001341	0.786	1.72429	3e-06	0.000363	0.515	1.42899	1.9e-05	0.002787
ANAPC1	NM_022662.2	730647	ILMN_1804812	2	-0.193	0.874785	0.183702	0.670762	-0.762	0.589678	0	1.2e-05	-0.643	0.64038	5e-06	0.000527	-0.57	0.673617	0.002566	0.050839
ANAPC1	NM_022662.2	7210259	ILMN_1659553	2	-0.096	0.935623	0.16993	0.65168	-0.276	0.825878	0.000554	0.006141	-0.226	0.855002	0.003288	0.045401	-0.179	0.883315	0.018847	0.188106
ANAPC1	XM_001129602.1	460609	ILMN_1664435		-0.045	0.96929	0.332695	0.790832	-0.01	0.993092	0.829036	0.954421	-0.035	0.976032	0.491229	0.851226	0.035	1.02456	0.387551	0.815331
ANAPC10	NM_014885.3	6840706	ILMN_1770378	4	0.027	1.01889	0.716425	0.943764	0.11	1.07923	0.139596	0.449374	0.02	1.01396	0.762247	0.945852	0.083	1.05922	0.225782	0.685557
ANAPC11	XM_942695.1	6590537	ILMN_1674988		-0.002	0.998615	0.96704	0.994089	-0.001	0.999307	0.981327	0.995067	-0.095	0.936272	0.101387	0.456994	0.001	1.00069	0.989513	0.998661
ANAPC11	NM_001002244.1	4230544	ILMN_1726281	17	-0.019	0.986917	0.699245	0.939982	0.028	1.0196	0.63045	0.880682	-0.069	0.953299	0.223309	0.652784	0.047	1.03311	0.446116	0.846889
ANAPC11	NM_001002244.1	4540162	ILMN_1753773	17	-0.007	0.99516	0.901739	0.981849	0.006	1.00417	0.903963	0.975274	-0.049	0.966606	0.344169	0.764277	0.013	1.00905	0.826318	0.970029
ANAPC11	NM_001002246.1	10220	ILMN_2343563	17	0.185	1.13682	0.106468	0.557729	0.67	1.59107	0	2.4e-05	0.105	1.07549	0.364715	0.778894	0.485	1.39959	0.001729	0.03941
ANAPC11	NM_001002246.1	4760288	ILMN_1722102	17	0.278	1.21251	0.167165	0.648644	0.494	1.40834	1.6e-05	0.000395	0.105	1.07549	0.209394	0.633958	0.216	1.16151	0.251863	0.715187
ANAPC13	NM_015391.2	6250382	ILMN_1793894	3	0.342	1.26751	0.006206	0.143928	0.363	1.2861	0.000639	0.006929	0.317	1.24574	0.002948	0.041975	0.02	1.01396	0.773068	0.957712
ANAPC2	NM_013366.3	4180634	ILMN_1813243	9	-0.043	0.970634	0.524176	0.888085	-0.03	0.97942	0.589319	0.861729	0.037	1.02598	0.476441	0.843531	0.013	1.00905	0.852992	0.974561
ANAPC2	NM_013366.3	3870424	ILMN_1733096	9	-0.027	0.981459	0.728274	0.946873	-0.076	0.948684	0.183969	0.522308	0.038	1.02669	0.544583	0.874697	-0.049	0.966606	0.484504	0.863605
ANAPC4	NM_013367.2	6450021	ILMN_1802973	4	0.065	1.04608	0.50373	0.880692	-0.299	0.812816	0.000287	0.003604	-0.34	0.790041	0.000156	0.005215	-0.364	0.777007	0.003638	0.06413
ANAPC5	NM_016237.3	4730408	ILMN_1723177	12	-0.028	0.980779	0.658147	0.929754	-0.11	0.926588	0.053507	0.239061	-0.353	0.782954	0.000103	0.003989	-0.083	0.944092	0.202035	0.660751
ANAPC7	NM_016238.1	160220	ILMN_2199284	12	-0.067	0.954621	0.355607	0.805042	-0.384	0.76631	0.000708	0.007549	-0.288	0.819037	0.001719	0.028557	-0.316	0.803294	0.00269	0.052707
ANG	NM_001097577.1	3890484	ILMN_1696974	14	0.092	1.06585	0.210878	0.699293	0.196	1.14552	0.02073	0.115514	0.122	1.08824	0.138871	0.53384	0.104	1.07475	0.161818	0.608747
ANG	NM_001097577.1	3930392	ILMN_1760727	14	0.197	1.14631	0.119813	0.581045	0.509	1.42306	2.5e-05	0.000557	0.149	1.1088	0.114873	0.488443	0.311	1.24057	0.01389	0.155306
ANGEL1	NM_015305.2	5550086	ILMN_1665871	14	0.063	1.04464	0.312824	0.779628	0.12	1.08673	0.057813	0.252635	-0.251	0.840314	0.000792	0.016559	0.058	1.04102	0.419107	0.833072
ANGEL2	NM_144567.3	1820441	ILMN_1736340	1	0.047	1.03311	0.422108	0.84355	-0.269	0.829895	0.00179	0.015976	-0.373	0.772175	8.9e-05	0.003585	-0.316	0.803294	0.000701	0.022688
ANGPT1	NM_001146.3	3120326	ILMN_1677723	8	-0.015	0.989657	0.746173	0.949855	-0.023	0.984184	0.695219	0.907728	-0.011	0.992404	0.833674	0.965116	-0.008	0.99447	0.887528	0.981397
ANGPT1	NM_001146.3	3360066	ILMN_2086890	8	-0.029	0.980099	0.571472	0.905375	-0.034	0.976709	0.518275	0.825374	0.002	1.00139	0.96623	0.993403	-0.005	0.99654	0.926943	0.988649
ANGPT2	NM_001118887.1	3360398	ILMN_3250879	8	-0.068	0.95396	0.267814	0.747329	-0.059	0.959929	0.287704	0.650047	-0.065	0.955945	0.270941	0.703533	0.009	1.00626	0.867034	0.977265
ANGPT2	NM_001147.1	3450066	ILMN_1774207	8	0.006	1.00417	0.906088	0.983162	-0.01	0.993092	0.836573	0.956649	-0.025	0.982821	0.665374	0.917147	-0.016	0.988971	0.746117	0.953636
ANGPT2	NM_001118888.1	3180689	ILMN_3250067	8	-0.028	0.980779	0.534586	0.891026	-0.127	0.915734	0.035478	0.176115	0.002	1.00139	0.968772	0.993754	-0.099	0.93368	0.08734	0.459098
ANGPT4	NM_015985.2	6040343	ILMN_1758443	20	-0.02	0.986233	0.634987	0.924296	-0.007	0.99516	0.876338	0.967345	-0.029	0.980099	0.572493	0.88647	0.013	1.00905	0.760569	0.956062
ANGPTL1	NM_004673.3	1230039	ILMN_1669773	1	-0.051	0.965267	0.290099	0.763505	-0.008	0.99447	0.886135	0.970153	0.027	1.01889	0.598489	0.895879	0.044	1.03097	0.449053	0.848119
ANGPTL1	NM_004673.3	2030450	ILMN_2145501	1	0.043	1.03025	0.475798	0.869654	0.008	1.00556	0.886415	0.970169	0.084	1.05995	0.189745	0.611083	-0.036	0.975355	0.547139	0.891754
ANGPTL2	NM_012098.2	7650672	ILMN_1772612	9	0.069	1.04899	0.153381	0.630891	-0.044	0.969962	0.320635	0.68252	-0.011	0.992404	0.798298	0.957285	-0.113	0.924663	0.035881	0.280245
ANGPTL3	NM_014495.2	1050561	ILMN_1695193	1	-0.103	0.931095	0.052705	0.426652	-0.053	0.96393	0.264754	0.626631	-0.106	0.929161	0.058223	0.333022	0.05	1.03526	0.281489	0.74134
ANGPTL3	NM_014495.2	6770427	ILMN_2143220	1	0.014	1.00975	0.79547	0.960216	0.01	1.00696	0.843152	0.958267	0.026	1.01819	0.650292	0.912947	-0.004	0.997231	0.92849	0.988787
ANGPTL4	NM_139314.1	4610433	ILMN_1707727	19	-0.04	0.972655	0.742648	0.94912	1.262	2.39828	2e-06	9.1e-05	1.099	2.14206	3e-06	0.000351	1.302	2.4657	2.7e-05	0.003271
ANGPTL4	NM_139314.1	990092	ILMN_1674376	19	0.018	1.01255	0.672943	0.93426	0.001	1.00069	0.989047	0.997268	-0.013	0.99103	0.818022	0.961672	-0.018	0.987601	0.73636	0.951394
ANGPTL4	NM_001039667.1	2450592	ILMN_2386444	19	-0.052	0.964598	0.583104	0.908986	0.173	1.1274	0.003117	0.025062	0.201	1.14949	0.001879	0.030261	0.225	1.16878	0.037472	0.287406
ANGPTL5	NM_178127.2	2360066	ILMN_2166696	11	-0.029	0.980099	0.695026	0.939209	-0.045	0.96929	0.541054	0.8379	0.063	1.04464	0.372533	0.784833	-0.015	0.989657	0.780361	0.959643
ANGPTL6	NM_031917.2	5050707	ILMN_1725518	19	-0.088	0.940826	0.070651	0.479608	-0.048	0.967276	0.320295	0.682351	-0.001	0.999307	0.990993	0.998507	0.04	1.02811	0.379236	0.810885
ANGPTL7	NM_021146.2	2640348	ILMN_1813361	1	0.055	1.03886	0.200983	0.68958	0.062	1.04391	0.195394	0.539518	0.092	1.06585	0.084723	0.41449	0.007	1.00486	0.866235	0.97724
ANK1	NM_020478.3	3180209	ILMN_1684694	8	0.029	1.0203	0.616961	0.919123	0.012	1.00835	0.803451	0.946103	0.027	1.01889	0.624224	0.905212	-0.016	0.988971	0.742751	0.952534
ANK1	NM_020475.2	2900402	ILMN_2317186	8	0.04	1.02811	0.362043	0.809148	0.041	1.02883	0.436118	0.773457	0.045	1.03168	0.356363	0.773356	0.001	1.00069	0.989029	0.998661
ANK2	NM_001148.3	4920441	ILMN_1652729	4	0.033	1.02314	0.515505	0.884616	0.013	1.00905	0.787485	0.941008	0.017	1.01185	0.723999	0.936209	-0.02	0.986233	0.704995	0.943221
ANK2	NM_020977.2	4780437	ILMN_1776363	4	0.013	1.00905	0.854488	0.973937	0.015	1.01045	0.813171	0.948974	0.02	1.01396	0.765016	0.946534	0.002	1.00139	0.975266	0.995835
ANK3	NM_001149.2	1850709	ILMN_2390609	10	0.093	1.06659	0.080095	0.503337	0.101	1.07252	0.054706	0.243193	-0.034	0.976709	0.629273	0.906261	0.008	1.00556	0.851057	0.974234
ANK3	NM_020987.2	2630600	ILMN_1651943	10	-0.012	0.991717	0.774846	0.954526	0.026	1.01819	0.64136	0.885261	-0.032	0.978063	0.569716	0.885716	0.038	1.02669	0.518734	0.880111
ANK3	NM_001149.2	1450672	ILMN_1661875	10	0.056	1.03958	0.377363	0.819451	0.057	1.0403	0.283551	0.645972	-0.025	0.982821	0.621688	0.904188	0.001	1.00069	0.986717	0.99816
ANKAR	NM_144708.2	110707	ILMN_2112829	2	-0.001	0.999307	0.990088	0.998107	-0.057	0.961261	0.240795	0.599344	-0.063	0.957271	0.257638	0.689619	-0.056	0.961927	0.191333	0.646739
ANKAR	NM_144708.2	1430563	ILMN_2112834	2	-0.033	0.977386	0.455066	0.86113	0.013	1.00905	0.790183	0.941715	-0.052	0.964598	0.323012	0.747568	0.046	1.0324	0.317628	0.769819
ANKDD1A	NM_182703.3	5890564	ILMN_1813139	15	0.104	1.07475	0.166331	0.647332	-0.004	0.997231	0.938704	0.984763	-0.003	0.997923	0.961715	0.992689	-0.108	0.927873	0.120305	0.531756
ANKFN1	NM_153228.2	6590152	ILMN_1811239	17	-0.024	0.983502	0.627878	0.922147	0.002	1.00139	0.960264	0.990047	0.066	1.04681	0.182861	0.602047	0.026	1.01819	0.586551	0.907349
ANKFY1	NM_016376.3	450300	ILMN_1794470	17	0.239	1.18017	0.114843	0.572397	-0.104	0.93045	0.25744	0.619215	-0.106	0.929161	0.22834	0.658501	-0.343	0.7884	0.020311	0.197288
ANKFY1	NM_020740.2	6220152	ILMN_1801464	17	-0.016	0.988971	0.729253	0.946873	-0.024	0.983502	0.610964	0.871086	-0.069	0.953299	0.185786	0.605106	-0.008	0.99447	0.851644	0.974234
ANKFY1	NM_016376.3	6980639	ILMN_1735364	17	-0.065	0.955945	0.280647	0.757137	-0.005	0.99654	0.933621	0.983609	0.001	1.00069	0.977954	0.995547	0.06	1.04247	0.428526	0.837837
ANKH	XM_944214.1	2680253	ILMN_1660778		-0.065	0.955945	0.253812	0.736331	-0.109	0.927231	0.10884	0.386126	-0.063	0.957271	0.310422	0.73916	-0.045	0.96929	0.457644	0.851835
ANKH	NM_054027.3	5130274	ILMN_1692080	5	-0.072	0.951318	0.150126	0.627291	-0.063	0.957271	0.22909	0.584595	-0.038	0.974004	0.496974	0.852955	0.009	1.00626	0.828851	0.970365
ANKHD1	NM_017747.1	610546	ILMN_1765091	5	-0.063	0.957271	0.541663	0.893383	-0.15	0.90125	0.110218	0.388885	-0.186	0.87904	0.077071	0.39315	-0.087	0.941478	0.306105	0.760957
ANKHD1	NM_024668.2	6380100	ILMN_2341382	5	-0.002	0.998615	0.973505	0.99542	-0.016	0.988971	0.777386	0.937894	-0.04	0.972655	0.526496	0.867615	-0.014	0.990343	0.759934	0.956057
ANKHD1	NM_017978.1	7150026	ILMN_1778304	5	0.039	1.0274	0.484727	0.87352	0.056	1.03958	0.350686	0.709005	0.064	1.04536	0.227027	0.656623	0.017	1.01185	0.774892	0.958099
ANKHD1-EIF4EBP3	NM_020690.4	520008	ILMN_1766560	5	-0.095	0.936272	0.05416	0.432505	-0.135	0.91067	0.01466	0.087346	-0.131	0.913198	0.030854	0.223717	-0.04	0.972655	0.381432	0.811544
ANKIB1	NM_019004.1	2970672	ILMN_3241218	7	-0.086	0.942131	0.24956	0.733395	-0.106	0.929161	0.041835	0.199436	-0.113	0.924663	0.048777	0.299837	-0.02	0.986233	0.777714	0.958845
ANKK1	NM_178510.1	780338	ILMN_1797873	11	-0.025	0.982821	0.65889	0.929776	-0.025	0.982821	0.648443	0.888323	0.005	1.00347	0.927124	0.985688	-0.001	0.999307	0.990591	0.998814
ANKLE1	NM_152363.4	110301	ILMN_3243457	19	-0.115	0.923382	0.075151	0.491415	-0.142	0.906262	0.012279	0.07581	-0.167	0.890693	0.008751	0.093267	-0.027	0.981459	0.65891	0.93102
ANKLE2	NM_015114.1	2360671	ILMN_3249608	12	0.415	1.3333	5.8e-05	0.011111	0.194	1.14393	0.002452	0.020717	0.006	1.00417	0.936663	0.987755	-0.221	0.857971	0.00506	0.079712
ANKMY1	NM_016552.2	6200358	ILMN_1799369	2	-0.001	0.999307	0.972249	0.995109	0.002	1.00139	0.961987	0.990436	-0.038	0.974004	0.456402	0.832326	0.004	1.00278	0.932615	0.989618
ANKMY1	NM_017844.2	2760102	ILMN_1675483	2	0.087	1.06216	0.224868	0.712578	-0.119	0.920826	0.038512	0.18748	-0.011	0.992404	0.847968	0.968161	-0.206	0.866938	0.009016	0.116277
ANKMY1	NM_017844.2	2970068	ILMN_2251062	2	0.02	1.01396	0.767565	0.95392	0.012	1.00835	0.831293	0.955193	-0.003	0.997923	0.96666	0.993464	-0.008	0.99447	0.905595	0.984922
ANKMY2	NM_020319.1	4890136	ILMN_1784292	7	0.223	1.16716	0.071233	0.481599	-0.123	0.918276	0.122144	0.413659	-0.403	0.756284	0.001849	0.029892	-0.346	0.786762	0.017529	0.179103
ANKRA2	NM_023039.2	7400114	ILMN_2185563	5	0.104	1.07475	0.04644	0.401714	0.286	1.21926	0.000682	0.007323	0.574	1.48865	1e-06	0.000237	0.182	1.13446	0.017473	0.178878
ANKRA2	NM_023039.2	1170630	ILMN_1687351	5	0.147	1.10726	0.039789	0.373851	0.258	1.19582	0.00278	0.022905	0.583	1.49796	3e-06	0.000429	0.111	1.07998	0.181051	0.633565
ANKRD1	NM_014391.2	6560112	ILMN_1716264	10	0.016	1.01115	0.765229	0.953613	0.163	1.11961	0.005281	0.038337	0.015	1.01045	0.74645	0.942241	0.147	1.10726	0.017989	0.182306
ANKRD10	NM_017664.2	6900674	ILMN_2115218	13	-0.06	0.959264	0.590167	0.911185	0.159	1.11651	0.097746	0.36115	-0.244	0.844401	0.01188	0.114674	0.219	1.16393	0.058056	0.370648
ANKRD10	NM_017664.2	4540689	ILMN_1711828	13	-0.061	0.958599	0.547942	0.895654	0.045	1.03168	0.602358	0.867415	0.045	1.03168	0.587581	0.891952	0.106	1.07624	0.264631	0.726255
ANKRD11	NM_013275.4	3370274	ILMN_2108709	16	0.33	1.25701	0.144777	0.619827	-0.38	0.768438	0.019347	0.109389	-0.444	0.735094	0.014077	0.129944	-0.71	0.61132	0.001469	0.035445
ANKRD11	NM_013275.4	5890403	ILMN_1690465	16	0.017	1.01185	0.739737	0.948673	-0.009	0.993781	0.867675	0.965062	-0.026	0.98214	0.630953	0.906636	-0.025	0.982821	0.657781	0.930733
ANKRD12	NM_015208.3	7040132	ILMN_1661833	18	-0.124	0.91764	0.076279	0.494515	-0.384	0.76631	2.7e-05	0.000584	-0.283	0.82188	0.00432	0.055579	-0.26	0.835088	0.001434	0.034962
ANKRD13A	NM_033121.1	2120224	ILMN_1689908	12	-0.072	0.951318	0.353701	0.803846	-0.191	0.875998	0.020652	0.11516	-0.044	0.969962	0.589561	0.892002	-0.119	0.920826	0.038252	0.290981
ANKRD13B	NM_152345.4	5910273	ILMN_1794070	17	0.191	1.14155	0.024885	0.300555	0.088	1.0629	0.185846	0.525053	0.014	1.00975	0.802468	0.958325	-0.103	0.931095	0.253444	0.7162
ANKRD13C	NM_030816.2	4810053	ILMN_2148507	1	-0.056	0.961927	0.472197	0.867926	-0.11	0.926588	0.147085	0.463237	-0.007	0.99516	0.919918	0.984025	-0.054	0.963262	0.282438	0.741781
ANKRD13D	XM_945561.1	610070	ILMN_1660183		-0.044	0.969962	0.395221	0.82828	-0.084	0.943438	0.191708	0.533964	-0.084	0.943438	0.233395	0.664267	-0.04	0.972655	0.50222	0.872723
ANKRD13D	XM_945565.1	2320064	ILMN_1667830		-0.071	0.951978	0.115214	0.573114	-0.072	0.951318	0.170557	0.502099	-0.075	0.949342	0.120574	0.499427	-0.001	0.999307	0.989827	0.998673
ANKRD13D	XM_945571.1	4010424	ILMN_1672356		-0.033	0.977386	0.612567	0.91837	0.008	1.00556	0.883551	0.969253	-0.032	0.978063	0.510762	0.859347	0.041	1.02883	0.562014	0.898182
ANKRD13D	NM_207354.1	4060451	ILMN_1662902	11	0.013	1.00905	0.800362	0.961497	0.029	1.0203	0.614992	0.873118	0.004	1.00278	0.92837	0.986153	0.016	1.01115	0.796475	0.963551
ANKRD13D	XM_945567.1	3850097	ILMN_1807112		0.073	1.0519	0.146905	0.623022	-0.037	0.97468	0.470954	0.796283	0.024	1.01677	0.650123	0.912947	-0.11	0.926588	0.068047	0.40514
ANKRD13D	XM_945557.1	3520692	ILMN_1790351		0.025	1.01748	0.592292	0.911194	0	1	0.997571	0.999515	0.027	1.01889	0.574265	0.887039	-0.025	0.982821	0.587652	0.907868
ANKRD16	NM_019046.1	50070	ILMN_1675435	10	-0.008	0.99447	0.888789	0.979544	0.011	1.00765	0.847056	0.959359	-0.092	0.938221	0.089638	0.427508	0.018	1.01255	0.785467	0.960702
ANKRD16	NM_019046.1	650008	ILMN_1659156	10	0.123	1.089	0.219009	0.706842	0.151	1.11034	0.009276	0.060689	-0.065	0.955945	0.223358	0.652802	0.027	1.01889	0.776734	0.95849
ANKRD16	NM_001009941.1	3450274	ILMN_2353431	10	0.139	1.10114	0.112442	0.569383	0.036	1.02527	0.538388	0.836372	-0.017	0.988286	0.770675	0.947827	-0.103	0.931095	0.168973	0.619075
ANKRD17	NM_032217.3	3130156	ILMN_1787064	4	-0.097	0.934975	0.189836	0.676842	-0.115	0.923382	0.072955	0.296987	-0.096	0.935623	0.147476	0.547205	-0.018	0.987601	0.752962	0.95478
ANKRD17	NM_198889.1	6940520	ILMN_1712019	4	-0.264	0.832776	0.047514	0.406464	-0.18	0.882703	0.06704	0.280246	-0.059	0.959929	0.402149	0.802601	0.084	1.05995	0.488508	0.866432
ANKRD17	NM_198889.1	4210437	ILMN_2406335	4	-0.183	0.880869	0.093815	0.530897	-0.129	0.914465	0.143169	0.456074	-0.012	0.991717	0.869802	0.972921	0.054	1.03814	0.538414	0.88855
ANKRD18A	XM_001717620.1	5810215	ILMN_3190486		-0.09	0.939523	0.129162	0.596079	-0.039	0.973329	0.446027	0.780712	-0.092	0.938221	0.089887	0.428028	0.051	1.03598	0.319629	0.7711
ANKRD18A	XM_001726105.1	7160022	ILMN_3255211	9	0.052	1.0367	0.334632	0.791641	0.023	1.01607	0.70428	0.911259	-0.004	0.997231	0.934101	0.98732	-0.029	0.980099	0.654505	0.929877
ANKRD18B	XM_001716325.1	5340202	ILMN_3192974		-0.044	0.969962	0.360971	0.80825	-0.012	0.991717	0.805418	0.946887	0.003	1.00208	0.957767	0.991832	0.032	1.02243	0.473659	0.858341
ANKRD18B	XM_001717197.1	5870356	ILMN_3233098		0.024	1.01677	0.617375	0.919232	0.048	1.03383	0.369314	0.72458	0.056	1.03958	0.257425	0.689529	0.024	1.01677	0.661254	0.931577
ANKRD19	NM_001010925.2	2480040	ILMN_1666221		0.045	1.03168	0.331349	0.790134	0.062	1.04391	0.209667	0.55986	0.161	1.11806	0.038269	0.257245	0.017	1.01185	0.713386	0.945093
ANKRD2	NM_020349.2	840333	ILMN_1682547	10	0.082	1.05848	0.079447	0.502443	0.117	1.08448	0.065967	0.276981	0.065	1.04608	0.187646	0.607858	0.035	1.02456	0.575876	0.90384
ANKRD20A1	NM_032250.1	6450661	ILMN_2215824	9	-0.097	0.934975	0.239032	0.724103	-0.181	0.882091	0.065035	0.274164	-0.048	0.967276	0.560407	0.882401	-0.084	0.943438	0.30212	0.758185
ANKRD20A1	NM_032250.2	4490484	ILMN_1679184		0.01	1.00696	0.823401	0.967571	-0.049	0.966606	0.30319	0.665861	-0.008	0.99447	0.850615	0.968735	-0.059	0.959929	0.238816	0.700558
ANKRD20A1	NM_032250.2	4290364	ILMN_1747839		0.048	1.03383	0.273538	0.751491	-0.049	0.966606	0.310392	0.673248	0.01	1.00696	0.831494	0.964437	-0.097	0.934975	0.064328	0.392419
ANKRD20A1	NM_032250.2	7050114	ILMN_1670452		-0.049	0.966606	0.408862	0.835743	0.024	1.01677	0.663636	0.894	0.019	1.01326	0.715891	0.934211	0.073	1.0519	0.233883	0.694865
ANKRD20A2	NM_001012421.1	2970564	ILMN_3244353	9	-0.003	0.997923	0.940893	0.989971	0.065	1.04608	0.293603	0.655539	0.059	1.04174	0.247516	0.678485	0.068	1.04826	0.312888	0.765797
ANKRD20A3	NM_001012419.1	4180609	ILMN_2289424	9	-0.015	0.989657	0.775562	0.954649	0.004	1.00278	0.944464	0.985875	0.005	1.00347	0.935373	0.987671	0.019	1.01326	0.724554	0.948115
ANKRD20A3	NM_001012419.1	5260703	ILMN_2398211	9	0.065	1.04608	0.157922	0.636128	0.034	1.02385	0.628222	0.879366	0.089	1.06363	0.123198	0.505096	-0.032	0.978063	0.673706	0.934708
ANKRD20A4	NM_001098805.1	6420095	ILMN_3240529	9	-0.014	0.990343	0.78785	0.958332	-0.004	0.997231	0.946004	0.986264	-0.063	0.957271	0.26975	0.702383	0.01	1.00696	0.877196	0.979114
ANKRD20B	NR_003366.1	6480523	ILMN_2181867		-0.149	0.901875	0.012602	0.211668	-0.132	0.912565	0.071772	0.293796	-0.106	0.929161	0.061536	0.344023	0.018	1.01255	0.804489	0.965346
ANKRD20B	NR_003366.1	7510500	ILMN_1757147		0.059	1.04174	0.173151	0.656863	0.062	1.04391	0.197002	0.541879	-0.029	0.980099	0.543111	0.874415	0.003	1.00208	0.945653	0.99072
ANKRD20B	NR_003366.1	2260372	ILMN_1680631		-0.016	0.988971	0.702607	0.940751	0.116	1.08373	0.020311	0.113713	0.003	1.00208	0.944241	0.989023	0.133	1.09657	0.014475	0.158562
ANKRD20B	NR_003366.2	770725	ILMN_3307747	2	-0.005	0.99654	0.91369	0.984838	0.009	1.00626	0.845038	0.958637	0.006	1.00417	0.91003	0.981949	0.014	1.00975	0.737801	0.951876
ANKRD21	NM_174981.2	4490414	ILMN_1671812	21	-0.015	0.989657	0.764765	0.953501	-0.121	0.91955	0.028283	0.147896	-0.057	0.961261	0.267064	0.699725	-0.106	0.929161	0.049215	0.337114
ANKRD22	NM_144590.1	4150270	ILMN_2132599	10	-0.151	0.900626	0.039714	0.373601	-0.156	0.89751	0.02594	0.137884	-0.038	0.974004	0.527298	0.867868	-0.004	0.997231	0.929448	0.989095
ANKRD22	NM_144590.2	130181	ILMN_1799848	10	-0.046	0.968618	0.426894	0.846396	-0.112	0.925304	0.128219	0.426604	-0.02	0.986233	0.746488	0.942241	-0.065	0.955945	0.414151	0.829741
ANKRD23	NM_144994.6	3520195	ILMN_1747151	2	-0.007	0.99516	0.911306	0.984272	0.015	1.01045	0.784755	0.940021	-0.047	0.967947	0.433361	0.81961	0.022	1.01537	0.682922	0.937379
ANKRD23	NM_144994.7	1300634	ILMN_2227338	2	0.018	1.01255	0.800696	0.961497	-0.029	0.980099	0.701879	0.910347	-0.001	0.999307	0.985763	0.997384	-0.047	0.967947	0.523804	0.882704
ANKRD24	NM_133475.1	3460626	ILMN_1768202	19	0.08	1.05702	0.174026	0.658276	0.028	1.0196	0.632955	0.88231	-0.014	0.990343	0.803031	0.958394	-0.052	0.964598	0.270846	0.732787
ANKRD24	NM_133475.1	6280551	ILMN_2101368	19	-0.018	0.987601	0.73353	0.947326	-0.057	0.961261	0.251414	0.612121	0	1	0.997699	0.999532	-0.04	0.972655	0.434293	0.841479
ANKRD26	NM_014915.2	5560189	ILMN_1740161	10	0.044	1.03097	0.291453	0.764215	0.004	1.00278	0.926524	0.982109	0.03	1.02101	0.646457	0.911852	-0.04	0.972655	0.376811	0.809814
ANKRD27	NM_032139.2	5670112	ILMN_1794063	19	-0.188	0.877822	0.121352	0.583249	-0.448	0.733058	0.000279	0.003521	-0.185	0.879649	0.097297	0.446367	-0.26	0.835088	0.013135	0.149838
ANKRD28	NM_015199.2	2760563	ILMN_2232520	3	0.206	1.15349	0.001349	0.06173	-0.06	0.959264	0.196882	0.541739	-0.188	0.877822	0.029911	0.219381	-0.266	0.831622	0.000191	0.010131
ANKRD28	NM_015199.2	360064	ILMN_1697594	3	0.086	1.06142	0.092664	0.528933	0.103	1.074	0.045956	0.213918	0.013	1.00905	0.784736	0.952417	0.017	1.01185	0.710211	0.944382
ANKRD29	NM_173505.2	3130114	ILMN_1749338	18	-0.117	0.922103	0.029279	0.324846	-0.173	0.886996	0.013749	0.082909	0.129	1.09354	0.031997	0.229161	-0.056	0.961927	0.399448	0.821855
ANKRD29	NM_173505.2	1500358	ILMN_2075643	18	-0.234	0.850274	0.001118	0.055971	-0.082	0.944747	0.255572	0.617104	0.217	1.16231	0.00239	0.03607	0.152	1.11111	0.067758	0.404064
ANKRD30A	XM_001131823.1	5910309	ILMN_1796059		-0.02	0.986233	0.780897	0.956578	0.02	1.01396	0.703769	0.911048	-0.002	0.998615	0.973935	0.994819	0.04	1.02811	0.565852	0.899689
ANKRD30A	XM_940707.1	3060537	ILMN_1756727		0.017	1.01185	0.683095	0.936384	0.019	1.01326	0.703618	0.911	0.017	1.01185	0.71934	0.935213	0.002	1.00139	0.971378	0.995303
ANKRD30A	XM_001131823.1	4900215	ILMN_1813607		0.069	1.04899	0.130302	0.597435	0.079	1.05629	0.095217	0.354576	0.061	1.04319	0.214431	0.641921	0.01	1.00696	0.807966	0.965893
ANKRD30B	NM_001029862.1	1770273	ILMN_1730678	18	0.415	1.3333	0.015089	0.232141	1.361	2.56863	0	3e-06	-0.059	0.959929	0.574656	0.887208	0.945	1.92519	0.000158	0.00907
ANKRD31	XM_927671.2	6100315	ILMN_1708056	5	0.017	1.01185	0.7257	0.946309	0.04	1.02811	0.502321	0.81537	0.028	1.0196	0.629072	0.906161	0.023	1.01607	0.731792	0.949871
ANKRD32	NM_032290.2	1070736	ILMN_2214278	5	-0.409	0.753145	0.00045	0.033865	-0.518	0.698339	2.3e-05	0.000521	-0.216	0.860949	0.009913	0.101239	-0.109	0.927231	0.05016	0.341091
ANKRD32	NM_032290.2	6380747	ILMN_1805985	5	-0.361	0.778625	0.000545	0.038186	-0.388	0.764188	5e-06	0.000181	-0.161	0.894405	0.153641	0.55697	-0.027	0.981459	0.670588	0.933683
ANKRD33	NM_182608.2	4860707	ILMN_1667748	12	0.182	1.13446	0.071459	0.481958	0.506	1.42011	4e-06	0.000134	0.339	1.26488	8.6e-05	0.003506	0.324	1.2518	0.009379	0.119497
ANKRD34A	NM_001039888.2	1090142	ILMN_2119793	1	-0.066	0.955283	0.279249	0.755893	-0.09	0.939523	0.169228	0.499519	-0.105	0.929805	0.079163	0.399343	-0.024	0.983502	0.72659	0.948504
ANKRD34B	NM_001004441.1	3390451	ILMN_1655766	5	-0.048	0.967276	0.4506	0.859568	-0.088	0.940826	0.163232	0.489581	-0.138	0.908778	0.050534	0.3063	-0.04	0.972655	0.524998	0.883102
ANKRD34C	XM_930512.2	2070576	ILMN_1758215	15	-0.072	0.951318	0.184389	0.671568	-0.085	0.942785	0.110005	0.388337	-0.048	0.967276	0.370567	0.78325	-0.013	0.99103	0.806649	0.96586
ANKRD35	NM_144698.3	4180437	ILMN_2145153	1	0.08	1.05702	0.181202	0.667989	0.04	1.02811	0.512721	0.82217	-0.073	0.950659	0.260459	0.693132	-0.039	0.973329	0.435139	0.841858
ANKRD35	NM_144698.2	4590377	ILMN_1798006	1	0.145	1.10573	0.015244	0.233014	0.071	1.05044	0.190968	0.532989	0.101	1.07252	0.063831	0.352702	-0.075	0.949342	0.204714	0.663414
ANKRD36	NM_198555.3	150730	ILMN_2382431	2	-0.003	0.997923	0.961188	0.993164	0.03	1.02101	0.60985	0.870604	-0.052	0.964598	0.4195	0.811879	0.033	1.02314	0.543259	0.890278
ANKRD36	NM_198555.3	5810050	ILMN_2280568	2	0.066	1.04681	0.225347	0.712999	0.079	1.05629	0.153267	0.47329	-0.02	0.986233	0.750298	0.943536	0.013	1.00905	0.765552	0.957451
ANKRD36	NM_198555.1	1450332	ILMN_1750459	2	-0.008	0.99447	0.890498	0.979986	0.033	1.02314	0.521655	0.827098	0.006	1.00417	0.905572	0.980902	0.042	1.02954	0.501972	0.872631
ANKRD36	XM_937233.2	1510246	ILMN_1686523		0.023	1.01607	0.699401	0.940008	0.01	1.00696	0.860399	0.963393	0.019	1.01326	0.74271	0.941281	-0.013	0.99103	0.824719	0.969717
ANKRD36B	NM_025190.2	3060010	ILMN_1780806	2	0.022	1.01537	0.688725	0.937829	-0.193	0.874785	0.004925	0.036238	-0.112	0.925304	0.123419	0.505493	-0.215	0.861546	0.008064	0.108065
ANKRD36B	NM_025190.2	6100066	ILMN_2189614	2	0.042	1.02954	0.30367	0.77353	-0.02	0.986233	0.692759	0.906761	0.012	1.00835	0.812032	0.960646	-0.061	0.958599	0.218826	0.678566
ANKRD37	NM_181726.2	240682	ILMN_1756417	4	-0.254	0.838568	0.003082	0.097789	0.068	1.04826	0.427561	0.767717	0.443	1.35943	5.3e-05	0.002545	0.322	1.25006	0.005225	0.081016
ANKRD38	NM_181712.3	7610128	ILMN_1776936		0.027	1.01889	0.558487	0.900939	0.02	1.01396	0.680068	0.901401	0.091	1.06511	0.065331	0.357595	-0.007	0.99516	0.893991	0.982367
ANKRD39	NM_016466.4	6220553	ILMN_1710979	2	0.215	1.1607	0.035286	0.353206	0.244	1.18427	0.005159	0.037635	0.159	1.11651	0.064023	0.353252	0.029	1.0203	0.71463	0.945238
ANKRD40	NM_052855.2	5560142	ILMN_1758846	17	-0.192	0.875391	0.010319	0.189456	-0.053	0.96393	0.36112	0.718656	0.262	1.19914	0.004635	0.058698	0.138	1.10038	0.042917	0.311529
ANKRD41	NM_152363.2	1050440	ILMN_1751744	19	-0.151	0.900626	0.008627	0.173046	-0.205	0.867539	0.001497	0.013835	-0.165	0.891929	0.006894	0.078154	-0.054	0.963262	0.283979	0.743305
ANKRD41	NM_152363.2	4670554	ILMN_2091590	19	0.117	1.08448	0.319494	0.783645	0.021	1.01466	0.664457	0.894396	-0.122	0.918913	0.067599	0.364607	-0.097	0.934975	0.401737	0.823276
ANKRD42	NM_182603.1	2120392	ILMN_1676605	11	-0.142	0.906262	0.023529	0.292082	-0.011	0.992404	0.822526	0.951581	-0.062	0.957935	0.24524	0.675456	0.131	1.09505	0.030394	0.253323
ANKRD43	NM_175873.4	2450274	ILMN_1779882	5	-0.045	0.96929	0.42837	0.847177	0.01	1.00696	0.824745	0.952745	-0.025	0.982821	0.585146	0.890654	0.055	1.03886	0.334691	0.782792
ANKRD44	NM_153697.1	520280	ILMN_1755049	2	-0.036	0.975355	0.58348	0.909162	0.017	1.01185	0.706847	0.912303	-0.031	0.978742	0.518054	0.863205	0.053	1.03742	0.424893	0.836501
ANKRD44	NM_153697.1	5810228	ILMN_2059844	2	-0.002	0.998615	0.97259	0.995178	0.057	1.0403	0.318223	0.680428	-0.027	0.981459	0.60067	0.896601	0.059	1.04174	0.303586	0.759053
ANKRD45	NM_198493.1	5560224	ILMN_1733716	1	-0.012	0.991717	0.830448	0.969232	0.016	1.01115	0.779865	0.938705	0.085	1.06069	0.151271	0.553253	0.028	1.0196	0.5537	0.893936
ANKRD46	NM_198401.2	2750598	ILMN_1712298	8	-0.005	0.99654	0.919261	0.985561	0.435	1.35191	2e-05	0.000471	0.279	1.21335	0.000397	0.01009	0.44	1.3566	5.6e-05	0.004737
ANKRD47	NM_198471.1	4860603	ILMN_1755588	19	0.14	1.10191	0.020562	0.274403	0.393	1.31312	0.000116	0.001783	0.62	1.53688	1e-06	0.000164	0.253	1.19168	0.003886	0.06712
ANKRD49	NM_017704.2	520341	ILMN_1669259	11	0.076	1.05409	0.186643	0.674044	0.152	1.11111	0.078244	0.311077	0.039	1.0274	0.552522	0.878625	0.076	1.05409	0.372747	0.807208
ANKRD5	NM_022096.4	1740546	ILMN_1793466	20	-0.018	0.987601	0.728629	0.946873	0.026	1.01819	0.655455	0.89103	0.047	1.03311	0.37109	0.783659	0.044	1.03097	0.458331	0.851951
ANKRD5	NM_022096.4	290450	ILMN_1728957	20	-0.015	0.989657	0.722703	0.945139	-0.032	0.978063	0.504129	0.816283	0.078	1.05555	0.169123	0.582932	-0.017	0.988286	0.731073	0.949744
ANKRD5	NM_198798.1	7100433	ILMN_2367300	20	-0.029	0.980099	0.592152	0.911185	-0.036	0.975355	0.486132	0.805787	0.145	1.10573	0.034216	0.239736	-0.007	0.99516	0.899832	0.983866
ANKRD50	NM_020337.1	1770187	ILMN_2226304	4	-0.089	0.940174	0.109174	0.563584	-0.026	0.98214	0.577159	0.855449	0.008	1.00556	0.901124	0.980189	0.063	1.04464	0.204938	0.663414
ANKRD52	NM_173595.3	3870402	ILMN_3244029	12	-0.096	0.935623	0.145533	0.621268	-0.115	0.923382	0.063811	0.270695	-0.068	0.95396	0.282024	0.713863	-0.019	0.986917	0.709727	0.94408
ANKRD53	NM_024933.2	150097	ILMN_1772660	2	-0.033	0.977386	0.464961	0.865082	-0.042	0.971307	0.448965	0.782951	-0.001	0.999307	0.979121	0.995768	-0.009	0.993781	0.867394	0.977295
ANKRD54	NM_138797.1	2340598	ILMN_1766309	22	-0.148	0.902501	0.132563	0.601042	-0.151	0.900626	0.050086	0.22758	-0.032	0.978063	0.737801	0.939638	-0.003	0.997923	0.969036	0.994925
ANKRD55	NM_001039935.1	4050600	ILMN_2341724	5	-0.028	0.980779	0.524511	0.888085	-0.078	0.94737	0.145699	0.460908	-0.012	0.991717	0.820986	0.961902	-0.049	0.966606	0.324294	0.774834
ANKRD56	NM_001029870.1	2190673	ILMN_2072045	4	-0.043	0.970634	0.34086	0.796035	-0.062	0.957935	0.209669	0.55986	-0.079	0.946714	0.115115	0.488858	-0.019	0.986917	0.66664	0.932522
ANKRD57	NM_023016.3	2510224	ILMN_1724040	2	0.046	1.0324	0.694233	0.939177	0.037	1.02598	0.617448	0.874482	0.302	1.23285	0.002226	0.034297	-0.009	0.993781	0.941868	0.990345
ANKRD58	XM_293380.4	5270474	ILMN_1692849	X	-0.036	0.975355	0.66893	0.932704	-0.028	0.980779	0.690436	0.905903	0.001	1.00069	0.9872	0.99748	0.008	1.00556	0.883227	0.980656
ANKRD6	NM_014942.2	4880465	ILMN_2178587	6	-0.039	0.973329	0.494245	0.878159	-0.138	0.908778	0.057203	0.25078	0.002	1.00139	0.973854	0.994819	-0.099	0.93368	0.15567	0.598874
ANKRD6	NM_014942.3	2030014	ILMN_1698159	6	0.011	1.00765	0.818945	0.966728	-0.032	0.978063	0.521178	0.827007	0.086	1.06142	0.100435	0.453982	-0.043	0.970634	0.423771	0.835951
ANKRD7	NM_001077708.1	2370672	ILMN_2354930	7	0.003	1.00208	0.95015	0.991632	0.021	1.01466	0.718445	0.916322	0.016	1.01115	0.742828	0.941319	0.019	1.01326	0.755938	0.95553
ANKRD7	NM_001077708.1	4260653	ILMN_1779951	7	0.012	1.00835	0.801084	0.961541	-0.03	0.97942	0.569937	0.852316	0.085	1.06069	0.17903	0.596572	-0.042	0.971307	0.374593	0.807898
ANKRD9	NM_152326.2	7050370	ILMN_2048607	14	0.435	1.35191	0.050238	0.417156	-0.153	0.899378	0.213337	0.564965	-0.399	0.758384	0.014561	0.132961	-0.587	0.665726	0.004045	0.068765
ANKRD9	NM_152326.2	4730767	ILMN_1675937	14	-0.123	0.918276	0.042147	0.384509	-0.233	0.850864	0.001073	0.010564	-0.071	0.951978	0.308071	0.73689	-0.111	0.925946	0.046119	0.324965
ANKS1A	NM_015245.2	5390064	ILMN_1813669	6	0.191	1.14155	0.066166	0.466287	-0.232	0.851454	0.022757	0.124574	-0.457	0.7285	0.001409	0.024946	-0.423	0.745872	0.001687	0.038756
ANKS1B	NM_181670.2	2350201	ILMN_1758392	12	-0.123	0.918276	0.015502	0.235279	-0.101	0.932386	0.057411	0.251338	-0.123	0.918276	0.03447	0.2408	0.022	1.01537	0.631988	0.923014
ANKS1B	NM_020140.2	6660463	ILMN_2340974	12	-0.036	0.975355	0.582761	0.908942	-0.087	0.941478	0.151595	0.470997	-0.038	0.974004	0.518465	0.863378	-0.05	0.965936	0.378421	0.810429
ANKS1B	NM_152788.3	6100113	ILMN_1696131	12	0.03	1.02101	0.646656	0.92771	0.035	1.02456	0.51703	0.824434	-0.014	0.990343	0.787584	0.953489	0.005	1.00347	0.930662	0.989221
ANKS3	NM_133450.2	6510445	ILMN_1751636	16	0.029	1.0203	0.501685	0.880196	-0.01	0.993092	0.817284	0.949905	-0.042	0.971307	0.423208	0.813503	-0.039	0.973329	0.393657	0.818486
ANKS4B	NM_145865.1	1110382	ILMN_2199658	16	-0.106	0.929161	0.034673	0.350789	-0.028	0.980779	0.524833	0.82899	-0.018	0.987601	0.70776	0.931758	0.077	1.05482	0.092103	0.471612
ANKS6	NM_173551.3	1050400	ILMN_1735108	9	0.045	1.03168	0.409104	0.835877	0.04	1.02811	0.541915	0.838274	-0.001	0.999307	0.989278	0.998107	-0.005	0.99654	0.939031	0.990163
ANKZF1	NM_001042410.1	580598	ILMN_1677487	2	-0.023	0.984184	0.74692	0.949896	-0.167	0.890693	0.007634	0.051823	-0.112	0.925304	0.124894	0.507906	-0.144	0.905006	0.04879	0.335394
ANKZF1	NM_018089.2	5090475	ILMN_2370692	2	-0.085	0.942785	0.137653	0.609243	-0.202	0.869345	0.002483	0.02092	-0.087	0.941478	0.148046	0.548047	-0.117	0.922103	0.039641	0.297534
ANKZF1	NM_018089.2	5050364	ILMN_2273796	2	0.016	1.01115	0.765184	0.953613	0.063	1.04464	0.313658	0.676386	-0.003	0.997923	0.962106	0.992722	0.047	1.03311	0.433882	0.841258
ANLN	NM_018685.2	6450669	ILMN_1739645	7	-0.942	0.520511	0.000275	0.025872	-1.355	0.390935	0	6e-06	-0.616	0.652477	2.4e-05	0.001559	-0.413	0.75106	0.014988	0.162071
ANO1	NM_018043.5	6350397	ILMN_3237961	11	-1.771	0.293006	0	9.1e-05	-1.32	0.400535	0	0	-0.002	0.998615	0.973829	0.994819	0.451	1.36699	4.4e-05	0.004132
ANO10	NM_018075.3	7040554	ILMN_1767111	3	-0.093	0.937571	0.063388	0.457476	-0.112	0.925304	0.048758	0.223491	-0.118	0.921464	0.033972	0.238592	-0.019	0.986917	0.713541	0.945093
ANO2	NM_020373.2	6580300	ILMN_3248094	12	-0.035	0.976032	0.592141	0.911185	0.037	1.02598	0.544423	0.839874	0.004	1.00278	0.942499	0.988817	0.072	1.05117	0.320943	0.771956
ANO3	NM_031418.2	5820300	ILMN_3240765	11	-0.045	0.96929	0.493437	0.877992	-0.068	0.95396	0.253058	0.614023	-0.014	0.990343	0.814185	0.960912	-0.023	0.984184	0.649832	0.928811
ANO4	NM_178826.2	6220440	ILMN_2228215	12	-0.014	0.990343	0.819302	0.966863	-0.094	0.936921	0.146287	0.462079	0.01	1.00696	0.869378	0.972855	-0.08	0.946058	0.123272	0.53868
ANO5	NM_213599.1	1450593	ILMN_1690154	11	-0.014	0.990343	0.760883	0.952769	-0.032	0.978063	0.495064	0.81084	-0.001	0.999307	0.977623	0.995403	-0.018	0.987601	0.730264	0.949518
ANO6	NM_001025356.1	7040674	ILMN_1674941	12	-0.357	0.780786	0.009191	0.177982	-0.53	0.692555	8.7e-05	0.001418	-0.378	0.769504	0.00459	0.058294	-0.172	0.887611	0.037667	0.28835
ANO7	NM_001001891.3	2470204	ILMN_1675423	2	-0.044	0.969962	0.432376	0.849881	-0.031	0.978742	0.55093	0.842758	0.015	1.01045	0.768121	0.946721	0.013	1.00905	0.812859	0.967145
ANO7	NM_001001891.3	6020008	ILMN_1683824	2	0.141	1.10267	0.051694	0.42245	0.034	1.02385	0.540988	0.837863	0.037	1.02598	0.502912	0.855129	-0.107	0.928517	0.078939	0.43552
ANO7	NM_001001666.3	6280746	ILMN_1732948	2	0.028	1.0196	0.556329	0.899512	-0.002	0.998615	0.963989	0.990901	0.039	1.0274	0.423534	0.8138	-0.03	0.97942	0.541565	0.889704
ANO8	NM_020959.1	2900438	ILMN_1709124	19	0.061	1.04319	0.346266	0.799509	0	1	0.995116	0.998832	-0.005	0.99654	0.93799	0.988101	-0.061	0.958599	0.332686	0.781763
ANO9	NM_001012302.2	3400121	ILMN_1769259	11	0.005	1.00347	0.927897	0.988054	-0.053	0.96393	0.362496	0.719637	-0.057	0.961261	0.316606	0.742883	-0.058	0.960595	0.317436	0.769726
ANO9	NM_001012302.2	5720373	ILMN_1798679	11	-0.012	0.991717	0.768753	0.95392	-0.079	0.946714	0.155767	0.477175	-0.009	0.993781	0.849808	0.968514	-0.067	0.954621	0.212326	0.671322
ANO9	NM_001012302.2	2750711	ILMN_1762629	11	0.087	1.06216	0.106622	0.558218	-0.028	0.980779	0.575342	0.854631	0.033	1.02314	0.548416	0.87662	-0.115	0.923382	0.055651	0.361344
ANP32A	NM_006305.2	1240424	ILMN_1807945	15	-0.097	0.934975	0.565792	0.903367	-0.28	0.823591	0.001701	0.015326	-0.255	0.837987	0.012709	0.120904	-0.183	0.880869	0.276111	0.737188
ANP32B	NM_006401.2	3850053	ILMN_1684293	9	-0.394	0.761017	0.00014	0.017693	-1.24	0.423373	0	1e-06	-0.639	0.642158	1e-06	0.000179	-0.846	0.556325	3e-06	0.001029
ANP32C	NM_012403.1	6980328	ILMN_1655868	4	0.152	1.11111	0.145834	0.621599	-0.047	0.967947	0.502569	0.815415	-0.16	0.895025	0.045673	0.287329	-0.199	0.871154	0.028248	0.242066
ANP32C	NM_012403.1	1230725	ILMN_2151412	4	0.04	1.02811	0.37755	0.819507	-0.013	0.99103	0.772761	0.936538	-0.004	0.997231	0.94251	0.988817	-0.053	0.96393	0.257992	0.719896
ANP32D	NM_012404.2	4850114	ILMN_1728191	12	0.038	1.02669	0.428659	0.847284	0.078	1.05555	0.222933	0.577777	0.087	1.06216	0.117911	0.494191	0.039	1.0274	0.542882	0.890278
ANP32E	NM_030920.2	1070632	ILMN_1684923	1	-0.04	0.972655	0.402865	0.832027	0.023	1.01607	0.614747	0.873104	0.001	1.00069	0.981449	0.996091	0.063	1.04464	0.198982	0.65684
ANPEP	NM_001150.1	5810612	ILMN_1763837	15	0.078	1.05555	0.22399	0.711463	0.05	1.03526	0.305603	0.668697	-0.02	0.986233	0.709479	0.932205	-0.029	0.980099	0.645857	0.927223
ANRIL	NR_003529.1	780538	ILMN_1887731	9	0.022	1.01537	0.681366	0.93608	-0.019	0.986917	0.756721	0.930581	0.037	1.02598	0.56738	0.884991	-0.041	0.971981	0.449374	0.848203
ANTXR1	NM_032208.1	20647	ILMN_1670379	2	0.298	1.22944	0.017884	0.25415	-0.22	0.858565	0.063297	0.269431	-0.107	0.928517	0.159147	0.566255	-0.518	0.698339	0.008322	0.110528
ANTXR1	NM_053034.1	3120689	ILMN_2387995	2	0.033	1.02314	0.517656	0.885877	0.165	1.12117	0.013535	0.081953	0.046	1.0324	0.30892	0.737876	0.132	1.09581	0.07311	0.418744
ANTXR1	NM_032208.1	5700025	ILMN_1780894	2	-0.029	0.980099	0.63548	0.924622	0.005	1.00347	0.908418	0.976665	0.082	1.05848	0.270781	0.703404	0.034	1.02385	0.588394	0.908299
ANTXR1	NM_018153.2	60255	ILMN_1811877	2	0.151	1.11034	0.010783	0.194406	0.037	1.02598	0.413112	0.759169	0.152	1.11111	0.085754	0.417412	-0.114	0.924023	0.035446	0.278746
ANTXR2	NM_058172.3	10685	ILMN_1812926	4	-0.111	0.925946	0.077187	0.496703	0.099	1.07103	0.096399	0.357878	0.21	1.15669	0.006934	0.078483	0.21	1.15669	0.007411	0.102489
ANTXRL	NR_003601.1	1740491	ILMN_1668044	10	0.007	1.00486	0.890544	0.979986	0.004	1.00278	0.940954	0.985062	-0.022	0.984866	0.661757	0.916236	-0.003	0.997923	0.9432	0.990427
ANUBL1	NM_174890.1	3840653	ILMN_1668566	10	0.092	1.06585	0.133778	0.603256	0.121	1.08749	0.022056	0.121496	0.11	1.07923	0.031797	0.228434	0.029	1.0203	0.620124	0.919183
ANXA1	NM_000700.1	6520215	ILMN_2184184	9	-0.89	0.539614	0.001521	0.065887	-0.756	0.592136	0	1.3e-05	-0.199	0.871154	0.009168	0.096297	0.133	1.09657	0.483443	0.862851
ANXA10	NM_007193.3	1050242	ILMN_1699421	4	-0.676	0.625898	0.000254	0.02468	-0.479	0.717475	0.000735	0.007785	0.213	1.1591	0.294692	0.725214	0.198	1.14711	0.009555	0.120696
ANXA11	NM_001157.2	5900735	ILMN_1685170	10	0.179	1.1321	0.10755	0.560216	0.101	1.07252	0.15995	0.483949	-0.207	0.866337	0.013015	0.122923	-0.078	0.94737	0.44032	0.844259
ANXA11	NM_001157.2	1300274	ILMN_2380494	10	-0.048	0.967276	0.40034	0.830707	-0.16	0.895025	0.016489	0.095996	-0.181	0.882091	0.009206	0.096675	-0.112	0.925304	0.071965	0.416169
ANXA11	NM_145869.1	6960594	ILMN_1807003	10	-0.062	0.957935	0.360578	0.808111	0.031	1.02172	0.561984	0.848839	0.105	1.07549	0.061264	0.343274	0.093	1.06659	0.171999	0.622396
ANXA13	NM_001003954.1	5080274	ILMN_1737612	8	-0.066	0.955283	0.252337	0.734528	-0.024	0.983502	0.651675	0.889657	-0.04	0.972655	0.479429	0.845165	0.041	1.02883	0.344733	0.789423
ANXA13	NM_004306.2	6450725	ILMN_1799243	8	0.026	1.01819	0.688361	0.937701	-0.035	0.976032	0.486314	0.80582	-0.02	0.986233	0.673089	0.919612	-0.06	0.959264	0.361116	0.800192
ANXA13	NM_004306.2	1030184	ILMN_2412490	8	-0.006	0.99585	0.919247	0.985561	0.034	1.02385	0.459566	0.789817	0.043	1.03025	0.408342	0.805868	0.04	1.02811	0.48875	0.866575
ANXA2	NM_001002858.1	4780615	ILMN_2409167	15	0.231	1.17365	0.024297	0.296942	0.135	1.09809	0.196067	0.540352	-0.217	0.860353	0.012987	0.122707	-0.096	0.935623	0.412401	0.828762
ANXA2	NM_001002857.1	770730	ILMN_1711899	15	1.009	2.01252	0.000378	0.031301	0.76	1.69349	0.000953	0.009616	-0.066	0.955283	0.631641	0.90686	-0.249	0.841479	0.111864	0.515446
ANXA2	NM_001002857.1	3520328	ILMN_1755937	15	0.674	1.59549	8e-06	0.003622	1.061	2.08638	0	9e-06	0.205	1.15269	0.013441	0.125716	0.387	1.30767	0.000301	0.01319
ANXA2P1	NR_001562.1	270609	ILMN_1698100	4	0.118	1.08523	0.481188	0.871651	0.423	1.34071	0.000393	0.004652	-0.361	0.778625	0.003042	0.042855	0.305	1.23542	0.109621	0.510619
ANXA2P1	NR_001562.1	3370202	ILMN_2041101	4	-0.231	0.852044	0.256569	0.738039	-0.171	0.888227	0.139275	0.448652	-0.083	0.944092	0.424136	0.814027	0.06	1.04247	0.73489	0.950749
ANXA2P2	NR_003573.1	4890494	ILMN_3235632	9	0.253	1.19168	0.250538	0.733416	0.588	1.50316	0.00017	0.002389	-0.336	0.792235	0.021051	0.171322	0.335	1.26138	0.104281	0.500135
ANXA2P3	NR_001446.2	2810411	ILMN_1798372	10	0.372	1.29415	0.0039	0.11116	0.6	1.51572	7e-06	0.000216	-0.058	0.960595	0.522579	0.865743	0.228	1.17121	0.018034	0.182423
ANXA3	NM_005139.2	240594	ILMN_1694548	4	-0.583	0.667574	5.8e-05	0.011063	-0.462	0.725979	0.000185	0.002554	-0.253	0.83915	0.001433	0.025196	0.122	1.08824	0.240018	0.701952
ANXA4	NM_001153.2	3440079	ILMN_1711408	2	0.075	1.05336	0.51312	0.884027	-0.054	0.963262	0.460868	0.790192	0.429	1.3463	0.000654	0.014441	-0.129	0.914465	0.249034	0.712465
ANXA5	NM_001154.2	1070451	ILMN_1741003	4	-0.25	0.840896	0.055199	0.435302	-0.381	0.767905	0.001013	0.0101	-0.06	0.959264	0.5474	0.875855	-0.131	0.913198	0.1136	0.519238
ANXA6	NM_001155.3	2490598	ILMN_1678612	5	0.083	1.05922	0.136102	0.606853	0.112	1.08073	0.062962	0.268343	-0.028	0.980779	0.583775	0.890448	0.03	1.02101	0.636823	0.924448
ANXA6	NM_004033.2	450671	ILMN_2326591	5	-0.005	0.99654	0.919199	0.985561	0.092	1.06585	0.150842	0.469603	0.042	1.02954	0.489314	0.850039	0.097	1.06955	0.175203	0.62636
ANXA7	NM_004034.1	6330044	ILMN_1703791	10	-0.148	0.902501	0.223113	0.710585	-0.418	0.748461	0.004107	0.031203	-0.102	0.93174	0.296342	0.726334	-0.27	0.82932	0.038577	0.292044
ANXA7	NM_004034.1	6180671	ILMN_1662322	10	0.051	1.03598	0.348788	0.80057	0.147	1.10726	0.086231	0.331856	0.064	1.04536	0.360636	0.775984	0.096	1.06881	0.23871	0.700465
ANXA8	NM_001040084.1	2490682	ILMN_2095610	10	-0.001	0.999307	0.980302	0.996302	0.04	1.02811	0.462066	0.791062	0.057	1.0403	0.271569	0.704191	0.042	1.02954	0.409031	0.82701
ANXA8	NM_001630.1	1400711	ILMN_1778087	10	-0.001	0.999307	0.975053	0.995587	0.064	1.04536	0.229808	0.585542	0.256	1.19416	0.000676	0.014767	0.066	1.04681	0.186077	0.639418
ANXA8L1	NM_001098845.1	1580259	ILMN_3242004	10	0.062	1.04391	0.591244	0.911185	0.043	1.03025	0.436524	0.773764	-0.024	0.983502	0.661535	0.91621	-0.018	0.987601	0.865539	0.977142
ANXA8L2	NM_001630.2	7330132	ILMN_2186983	10	-0.011	0.992404	0.838617	0.970779	0.008	1.00556	0.872706	0.966136	0.013	1.00905	0.795083	0.956072	0.019	1.01326	0.717013	0.945544
ANXA9	NM_003568.1	1260100	ILMN_2217601	1	0.027	1.01889	0.662269	0.930051	0.006	1.00417	0.9324	0.983063	0.055	1.03886	0.388376	0.793972	-0.022	0.984866	0.741156	0.952384
AOAH	NM_001637.1	2940424	ILMN_1709820	7	0.048	1.03383	0.33894	0.794809	0.111	1.07998	0.036026	0.178275	0.072	1.05117	0.143664	0.541387	0.063	1.04464	0.216509	0.676824
AOC2	NM_001158.3	4290180	ILMN_2405185	17	-0.059	0.959929	0.338802	0.794809	-0.046	0.968618	0.397944	0.748071	-0.025	0.982821	0.602432	0.897396	0.013	1.00905	0.837249	0.972109
AOC2	NM_001158.3	4230307	ILMN_1741431	17	-0.003	0.997923	0.963787	0.993323	-0.09	0.939523	0.169359	0.499785	-0.023	0.984184	0.695867	0.92942	-0.087	0.941478	0.134234	0.560851
AOC2	NM_009590.2	580736	ILMN_1799863	17	-0.009	0.993781	0.862407	0.975536	-0.031	0.978742	0.559059	0.847222	0.09	1.06437	0.124243	0.506907	-0.022	0.984866	0.616317	0.918061
AOC3	NM_003734.2	6860309	ILMN_1782086	17	0.043	1.03025	0.339543	0.795173	0.076	1.05409	0.132678	0.435371	0.067	1.04754	0.31138	0.740164	0.033	1.02314	0.503567	0.873524
AOF2	NM_015013.2	730725	ILMN_1813840	1	0.571	1.48555	0.001614	0.068593	0.058	1.04102	0.302673	0.665375	-0.345	0.787308	0.001281	0.023279	-0.513	0.700764	0.00232	0.047811
AOX1	NM_001159.3	3780095	ILMN_1767113	2	-0.042	0.971307	0.360592	0.808111	-0.005	0.99654	0.932431	0.983063	-0.02	0.986233	0.696077	0.929464	0.037	1.02598	0.522855	0.882235
AOX2P	NR_001557.2	5290487	ILMN_1789676	2	0.075	1.05336	0.144292	0.619435	0.054	1.03814	0.270364	0.631656	-0.004	0.997231	0.923986	0.985085	-0.021	0.985549	0.680522	0.936348
AP1B1	NM_145730.1	730301	ILMN_2387505	22	-0.031	0.978742	0.557356	0.90028	-0.001	0.999307	0.9768	0.993754	-0.034	0.976709	0.491298	0.851226	0.029	1.0203	0.564556	0.899093
AP1B1	NM_145730.1	2470327	ILMN_1781983	22	0.232	1.17446	0.242564	0.727177	0.14	1.10191	0.101836	0.370761	0.159	1.11651	0.070595	0.374088	-0.091	0.938872	0.632876	0.923121
AP1G1	NM_001128.5	1850593	ILMN_2399622	16	0.085	1.06069	0.575344	0.90625	-0.028	0.980779	0.809136	0.948163	0.024	1.01677	0.842103	0.966884	-0.113	0.924663	0.244326	0.706953
AP1G1	NM_001128.5	1820136	ILMN_2399627	16	0.059	1.04174	0.649782	0.928351	-0.031	0.978742	0.730176	0.921569	0.163	1.11961	0.12647	0.510695	-0.09	0.939523	0.366347	0.803168
AP1G2	NM_003917.2	7400468	ILMN_1754179	14	-0.162	0.893785	0.017719	0.253178	-0.25	0.840896	0.001389	0.013026	-0.144	0.905006	0.012124	0.116552	-0.088	0.940826	0.217592	0.677694
AP1G2	NM_080545.1	3130215	ILMN_2276598	14	-0.052	0.964598	0.327512	0.787788	-0.012	0.991717	0.822215	0.951384	-0.075	0.949342	0.187075	0.607006	0.04	1.02811	0.388941	0.81599
AP1GBP1	NM_007247.3	4610112	ILMN_2415467	17	0.025	1.01748	0.595894	0.912461	0.038	1.02669	0.438179	0.77496	0.032	1.02243	0.506473	0.856702	0.014	1.00975	0.768291	0.957712
AP1GBP1	NM_007247.3	1580674	ILMN_1805247	17	0.08	1.05702	0.105042	0.556102	0.029	1.0203	0.537559	0.835744	0.046	1.0324	0.405166	0.804923	-0.05	0.965936	0.276486	0.737472
AP1M1	NM_032493.2	2190241	ILMN_1754738	19	0.171	1.12584	0.414682	0.838975	0.449	1.36509	0.000756	0.007966	0.14	1.10191	0.156832	0.562488	0.278	1.21251	0.208718	0.667614
AP1M2	NM_005498.3	1170041	ILMN_1705861	19	-0.043	0.970634	0.713401	0.94287	-0.244	0.844401	0.004298	0.032393	-0.026	0.98214	0.772393	0.948583	-0.201	0.869947	0.079918	0.437993
AP1S1	NM_057089.2	2190341	ILMN_1751345	7	-0.005	0.99654	0.944768	0.990915	0.129	1.09354	0.100088	0.366611	-0.027	0.981459	0.632656	0.907132	0.133	1.09657	0.142747	0.577259
AP1S1	NM_001283.2	7040079	ILMN_2316173	7	-0.053	0.96393	0.666062	0.931652	-0.074	0.95	0.453314	0.785834	0.019	1.01326	0.832183	0.964591	-0.022	0.984866	0.827812	0.970267
AP1S1	NM_057089.2	5490673	ILMN_1712806	7	-0.322	0.79996	0.00864	0.173046	0.04	1.02811	0.61043	0.870917	0.105	1.07549	0.168052	0.581199	0.362	1.28521	0.003362	0.060728
AP1S2	NM_003916.3	940706	ILMN_1766411	X	-0.088	0.940826	0.517684	0.885877	0.313	1.24229	0.006711	0.046699	0.378	1.29954	0.004089	0.053345	0.4	1.31951	0.008153	0.10887
AP1S2	NM_003916.3	1070192	ILMN_2120273	X	-0.049	0.966606	0.383753	0.823172	0.19	1.14076	0.024744	0.132992	0.513	1.42701	7.1e-05	0.003118	0.239	1.18017	0.01526	0.164148
AP1S3	NM_001039569.1	4480491	ILMN_1768610	2	-0.261	0.834509	0.000621	0.041036	-0.272	0.828171	0.00075	0.007914	-0.191	0.875998	0.020188	0.166283	-0.012	0.991717	0.844325	0.973432
AP2A1	NM_130787.2	1660072	ILMN_1815306	19	-0.196	0.872968	0.297739	0.769053	-0.482	0.715984	0.000138	0.002026	-0.155	0.898132	0.074639	0.386625	-0.286	0.820173	0.14471	0.580307
AP2A1	NM_130787.2	4390180	ILMN_2359211	19	-0.445	0.734584	0.001431	0.063939	-0.609	0.655651	2.2e-05	0.000512	-0.068	0.95396	0.312499	0.740604	-0.163	0.893166	0.131217	0.555092
AP2A1	NM_014203.2	5130019	ILMN_1673108	19	0.006	1.00417	0.917583	0.985478	-0.021	0.985549	0.710811	0.913671	-0.043	0.970634	0.438025	0.822712	-0.027	0.981459	0.620769	0.919482
AP2A2	NM_012305.2	6270041	ILMN_1803779	11	-0.025	0.982821	0.640778	0.926006	0.12	1.08673	0.062465	0.267048	0.096	1.06881	0.148882	0.549234	0.145	1.10573	0.024285	0.218956
AP2B1	NM_001282.2	2340451	ILMN_2331735	17	-0.225	0.855595	0.236684	0.722955	-0.174	0.886382	0.135363	0.440665	-0.022	0.984866	0.853749	0.969383	0.05	1.03526	0.744638	0.95312
AP2B1	NM_001282.2	1400605	ILMN_1681998	17	0.137	1.09962	0.074036	0.488543	0.103	1.074	0.136944	0.444025	0.112	1.08073	0.227031	0.656623	-0.034	0.976709	0.533196	0.886102
AP2M1	NM_004068.3	240187	ILMN_1699598	3	0.007	1.00486	0.950224	0.991675	0.163	1.11961	0.055782	0.24651	0.11	1.07923	0.19296	0.614348	0.156	1.11419	0.128935	0.551485
AP2M1	NM_004068.3	840148	ILMN_2402798	3	-0.074	0.95	0.480026	0.871138	0.235	1.17691	0.013291	0.080794	0.275	1.20999	0.014943	0.135391	0.309	1.23885	0.008067	0.108084
AP2S1	NM_004069.3	6370661	ILMN_1809957	19	-0.171	0.888227	0.028121	0.318421	-0.017	0.988286	0.845063	0.958642	0.023	1.01607	0.78954	0.954283	0.154	1.11265	0.170929	0.621009
AP2S1	NM_004069.3	3120228	ILMN_1662426	19	-0.569	0.674084	0.002977	0.095916	-0.142	0.906262	0.06289	0.268134	0.058	1.04102	0.438536	0.822905	0.427	1.34443	0.009291	0.118731
AP3B1	NM_003664.3	2230603	ILMN_1768867	5	0.037	1.02598	0.559683	0.901136	-0.387	0.764718	3.9e-05	0.000776	-0.193	0.874785	0.004446	0.056819	-0.425	0.744839	9.9e-05	0.006837
AP3B2	NM_004644.3	4230360	ILMN_1679256	15	-0.104	0.93045	0.150653	0.627992	-0.08	0.946058	0.251563	0.612283	-0.101	0.932386	0.153092	0.556258	0.024	1.01677	0.612339	0.915921
AP3D1	NM_001077523.1	1050053	ILMN_2284667	19	-0.152	0.900002	0.026625	0.310017	-0.207	0.866337	0.004457	0.033419	-0.002	0.998615	0.977045	0.995303	-0.055	0.962594	0.241338	0.703805
AP3D1	NM_003938.5	4210612	ILMN_1764945	19	0.185	1.13682	0.009993	0.185901	-0.192	0.875391	0.030876	0.158186	-0.447	0.733567	0.000217	0.006562	-0.377	0.770037	0.001439	0.035011
AP3D1	NM_001077523.1	6100719	ILMN_2390114	19	0.058	1.04102	0.513537	0.884205	-0.309	0.807201	0.002332	0.0199	-0.505	0.70466	0.000132	0.004677	-0.367	0.775393	0.000114	0.007305
AP3M1	NM_012095.4	2760202	ILMN_2362122	10	-0.088	0.940826	0.407271	0.83423	-0.156	0.89751	0.035952	0.177939	-0.116	0.922742	0.0919	0.432566	-0.068	0.95396	0.518504	0.880046
AP3M1	NM_207012.2	6200437	ILMN_1667086	10	-0.023	0.984184	0.812186	0.964745	-0.008	0.99447	0.888875	0.970512	-0.037	0.97468	0.751935	0.943928	0.015	1.01045	0.88372	0.980704
AP3M1	NM_207012.2	6380523	ILMN_1701774	10	0.055	1.03886	0.265285	0.745287	0.038	1.02669	0.43558	0.773079	0.023	1.01607	0.675733	0.921043	-0.017	0.988286	0.70908	0.944008
AP3M2	NM_006803.2	3420128	ILMN_1676946	8	0.688	1.61105	0.000972	0.052011	0.412	1.33053	6.5e-05	0.001145	0.007	1.00486	0.926727	0.985658	-0.276	0.825878	0.050583	0.342919
AP3S1	NM_001002924.1	7200402	ILMN_2311761	5	-1.024	0.491751	9.2e-05	0.01451	-0.751	0.594192	1.4e-05	0.00036	0.294	1.22603	0.016381	0.143988	0.273	1.20832	0.027069	0.234624
AP3S2	NM_005829.3	2750286	ILMN_1731596	15	-0.005	0.99654	0.937944	0.989937	-0.068	0.95396	0.141754	0.453268	-0.056	0.961927	0.35397	0.77141	-0.063	0.957271	0.359522	0.798997
AP4B1	NM_006594.1	510129	ILMN_1669377	1	0.184	1.13603	0.119531	0.580819	0.194	1.14393	0.06778	0.282316	0.233	1.17528	0.001596	0.027128	0.009	1.00626	0.946508	0.991045
AP4E1	NM_007347.3	270343	ILMN_1754531	15	-0.15	0.90125	0.036663	0.359296	-0.245	0.843816	0.000773	0.008108	-0.157	0.896888	0.017056	0.147832	-0.095	0.936272	0.093188	0.473678
AP4M1	NM_004722.3	2750168	ILMN_1779512	7	0.095	1.06807	0.159381	0.637848	0.005	1.00347	0.942365	0.985138	-0.075	0.949342	0.246072	0.676733	-0.09	0.939523	0.06921	0.40851
AP4S1	NM_007077.2	2970669	ILMN_1760466	14	-0.035	0.976032	0.604961	0.916308	-0.117	0.922103	0.080087	0.31594	-0.054	0.963262	0.445771	0.826814	-0.082	0.944747	0.135691	0.563813
APAF1	NM_181869.1	2760082	ILMN_2344798	12	0.045	1.03168	0.359196	0.807586	0.001	1.00069	0.983815	0.995567	0.148	1.10803	0.011029	0.108936	-0.044	0.969962	0.390059	0.816328
APAF1	NM_013229.2	1820324	ILMN_1659463	12	-0.088	0.940826	0.27166	0.749424	0.228	1.17121	0.002444	0.020659	0.65	1.56917	0.000101	0.003935	0.316	1.24487	0.002699	0.052819
APBA1	NM_001163.2	520372	ILMN_1668285	9	-0.083	0.944092	0.133218	0.602529	-0.044	0.969962	0.434993	0.772646	-0.066	0.955283	0.258418	0.690177	0.039	1.0274	0.412371	0.828762
APBA1	NM_001163.2	430112	ILMN_2182656	9	-0.029	0.980099	0.561569	0.901503	-0.025	0.982821	0.631014	0.880845	-0.031	0.978742	0.561131	0.882867	0.004	1.00278	0.941339	0.990323
APBA2	NM_005503.2	3710053	ILMN_1723626	15	0.071	1.05044	0.232656	0.719426	0.068	1.04826	0.210449	0.561061	0.082	1.05848	0.205054	0.628392	-0.002	0.998615	0.958288	0.993397
APBA2BP	NM_031232.2	7560243	ILMN_2364928	20	-0.024	0.983502	0.62575	0.921708	-0.109	0.927231	0.058621	0.255245	-0.017	0.988286	0.764318	0.946347	-0.085	0.942785	0.182257	0.635104
APBA2BP	NM_031232.2	1580152	ILMN_2270491	20	0.012	1.00835	0.781628	0.956761	0.005	1.00347	0.914792	0.978572	0.024	1.01677	0.597922	0.895455	-0.007	0.99516	0.882502	0.980406
APBA3	NM_004886.3	4070014	ILMN_1686610	19	0.101	1.07252	0.413657	0.838085	-0.121	0.91955	0.204308	0.552076	-0.261	0.834509	0.010107	0.102361	-0.222	0.857376	0.079402	0.436699
APBB1	NM_145689.1	1340040	ILMN_1769918	11	0.018	1.01255	0.689264	0.937861	0.008	1.00556	0.878533	0.967919	-0.035	0.976032	0.523592	0.866298	-0.011	0.992404	0.828961	0.970365
APBB1	NM_001164.2	6900180	ILMN_1699646	11	-0.04	0.972655	0.474722	0.869161	-0.033	0.977386	0.453541	0.785973	-0.006	0.99585	0.891221	0.977634	0.007	1.00486	0.902463	0.984336
APBB1	NM_145689.1	4570592	ILMN_1796271	11	0.009	1.00626	0.886661	0.97916	-0.073	0.950659	0.167799	0.4975	0.075	1.05336	0.230641	0.661403	-0.083	0.944092	0.264334	0.725838
APBB1IP	NM_019043.3	1820722	ILMN_1801710	10	0.252	1.19086	0.029161	0.324374	0.405	1.32409	0.000335	0.004096	0.191	1.14155	0.005281	0.064502	0.153	1.11188	0.203419	0.662126
APBB2	NM_173075.3	380707	ILMN_3251699		-0.033	0.977386	0.444514	0.856093	-0.056	0.961927	0.278071	0.639889	-0.022	0.984866	0.668863	0.918086	-0.022	0.984866	0.650046	0.928811
APBB2	NM_173075.2	990392	ILMN_1716790	4	0.012	1.00835	0.793862	0.959661	0.032	1.02243	0.48179	0.802704	0.176	1.12975	0.004722	0.05952	0.02	1.01396	0.682236	0.937171
APBB3	NM_133172.2	4120279	ILMN_1740772	5	0.264	1.2008	0.06885	0.474108	0.115	1.08298	0.183836	0.522118	-0.041	0.971981	0.60612	0.898229	-0.149	0.901875	0.24307	0.705302
APBB3	NM_133173.2	7320402	ILMN_2320513	5	0.144	1.10496	0.026615	0.309976	-0.038	0.974004	0.441113	0.77732	0.03	1.02101	0.551361	0.877985	-0.182	0.88148	0.010961	0.132522
APC	NM_000038.3	5720722	ILMN_1662668	5	-0.01	0.993092	0.895001	0.980935	-0.062	0.957935	0.252698	0.61372	-0.043	0.970634	0.526797	0.867718	-0.052	0.964598	0.456809	0.851453
APC2	NM_005883.2	4180358	ILMN_1659950	19	0.047	1.03311	0.415817	0.839835	0.031	1.02172	0.584164	0.859077	0.047	1.03311	0.481643	0.84626	-0.016	0.988971	0.720484	0.94656
APCDD1	NM_153000.3	4280739	ILMN_1656951	18	-0.124	0.91764	0.028673	0.321869	-0.082	0.944747	0.127683	0.425292	-0.037	0.97468	0.551928	0.878229	0.042	1.02954	0.451365	0.84929
APCDD1L	NM_153360.1	130138	ILMN_1689431	20	-0.035	0.976032	0.493632	0.878054	0.026	1.01819	0.607817	0.869823	-0.047	0.967947	0.353934	0.77141	0.061	1.04319	0.242156	0.70446
APCS	NM_001639.2	3460279	ILMN_1708833	1	0.069	1.04899	0.152347	0.629754	0.067	1.04754	0.178141	0.513528	0.04	1.02811	0.396982	0.799882	-0.002	0.998615	0.966052	0.994311
APEG1	NM_005876.3	6620484	ILMN_1740052	2	-0.019	0.986917	0.746679	0.949855	0.1	1.07177	0.161701	0.48678	-0.015	0.989657	0.84746	0.968005	0.119	1.08598	0.180846	0.633548
APEH	NM_001640.3	450475	ILMN_1718023	3	-0.375	0.771105	0.008666	0.173199	-1.17	0.444421	0	1.4e-05	-0.859	0.551335	6e-06	0.000619	-0.795	0.576343	1e-05	0.001976
APEX1	NM_080649.1	6510053	ILMN_1661886	14	0.396	1.31585	0.006156	0.143577	-0.151	0.900626	0.149896	0.467825	-0.337	0.791686	0.001157	0.021653	-0.546	0.684916	0.005224	0.081016
APEX1	NM_001641.2	3120309	ILMN_2319344	14	0.561	1.47529	0.001304	0.06113	0.075	1.05336	0.201999	0.549206	-0.266	0.831622	0.024388	0.190232	-0.486	0.714002	0.00187	0.041554
APEX2	NM_014481.2	1430047	ILMN_1652505	X	0.336	1.26225	0.007743	0.163892	0.696	1.62001	5e-06	0.000184	0.264	1.2008	0.002613	0.038422	0.359	1.28254	0.006707	0.095232
APH1A	NM_001077628.1	1850221	ILMN_1658472	1	-0.388	0.764188	0.008038	0.166555	-0.475	0.719467	0.000382	0.004533	-0.223	0.856782	0.02463	0.191614	-0.088	0.940826	0.536777	0.887586
APH1A	NM_001077628.1	7550364	ILMN_2398388	1	-0.381	0.767905	0.001687	0.070433	-0.379	0.76897	3.7e-05	0.000739	-0.094	0.936921	0.099142	0.450798	0.003	1.00208	0.974222	0.995772
APH1B	NM_031301.2	7160224	ILMN_1767816	15	-0.147	0.903127	0.169037	0.650833	0.05	1.03526	0.425548	0.766285	0.241	1.18181	0.010382	0.104496	0.198	1.14711	0.055161	0.359816
API5	NM_006595.2	7050523	ILMN_1815051	11	0.048	1.03383	0.783488	0.957041	-0.092	0.938221	0.322602	0.684256	-0.196	0.872968	0.008389	0.090422	-0.14	0.907519	0.471198	0.857121
APIP	NM_015957.1	7380010	ILMN_2128293	11	-0.701	0.615146	0	0.000521	-0.554	0.681129	2e-06	8.4e-05	-0.003	0.997923	0.955202	0.991544	0.147	1.10726	0.029218	0.247184
APIP	NM_015957.1	6200202	ILMN_1793598	11	-1.197	0.436181	0.000104	0.015352	-1.085	0.471392	0	1.8e-05	0.115	1.08298	0.088885	0.425303	0.113	1.08147	0.509728	0.87628
APITD1	NM_199295.1	5960709	ILMN_1793360	1	-0.421	0.746907	0.003398	0.102952	-0.577	0.670356	1.6e-05	0.000406	-0.337	0.791686	0.006718	0.076657	-0.155	0.898132	0.065186	0.395309
APITD1	NM_199295.1	1070360	ILMN_1788135	1	0.117	1.08448	0.108789	0.563128	-0.042	0.971307	0.530839	0.832555	-0.134	0.911301	0.096846	0.44542	-0.159	0.895646	0.076646	0.429469
APLF	NM_173545.1	7550673	ILMN_1808597	2	-0.065	0.955945	0.24459	0.728868	-0.066	0.955283	0.354882	0.712822	0.01	1.00696	0.861865	0.971185	0	1	0.995243	0.999179
APLF	NM_173545.1	4640477	ILMN_3243695	2	0.013	1.00905	0.77703	0.955318	0.012	1.00835	0.791172	0.942015	0.03	1.02101	0.531117	0.869836	-0.002	0.998615	0.969648	0.995199
APLN	NM_017413.3	7200427	ILMN_1689353	X	0.062	1.04391	0.19315	0.680536	0.047	1.03311	0.439601	0.77598	0	1	0.995407	0.999131	-0.016	0.988971	0.784921	0.960552
APLNR	NM_005161.3	4070438	ILMN_1700183	11	-0.085	0.942785	0.211918	0.700548	-0.059	0.959929	0.250943	0.611718	-0.058	0.960595	0.289818	0.720892	0.027	1.01889	0.670875	0.933701
APLP1	NM_005166.3	3140431	ILMN_2396198	19	-0.086	0.942131	0.061293	0.451306	0.027	1.01889	0.599976	0.866227	0.212	1.15829	0.006103	0.071418	0.112	1.08073	0.046123	0.324965
APLP1	NM_001024807.1	7000008	ILMN_1763834	19	0.086	1.06142	0.502152	0.880214	0.299	1.23029	0.002653	0.022099	0.394	1.31403	0.000473	0.011442	0.213	1.1591	0.095876	0.480655
APLP2	NM_001642.1	3060717	ILMN_2081465	11	-0.069	0.953299	0.342403	0.796868	-0.048	0.967276	0.366351	0.722319	0.071	1.05044	0.174542	0.590158	0.022	1.01537	0.752203	0.954565
APLP2	NM_001642.1	3450577	ILMN_1710482	11	0.118	1.08523	0.067983	0.471962	0.1	1.07177	0.129369	0.429	0.28	1.21419	0.000714	0.015335	-0.018	0.987601	0.751501	0.954307
APM-1	XM_113971.4	6270703	ILMN_1796737	18	0.043	1.03025	0.432904	0.849885	0.003	1.00208	0.963113	0.990715	-0.022	0.984866	0.762049	0.945749	-0.04	0.972655	0.410783	0.827865
APOA1	NM_000039.1	4570364	ILMN_1690884	11	-0.001	0.999307	0.985407	0.997044	0.012	1.00835	0.820686	0.950958	0.073	1.0519	0.208319	0.632546	0.013	1.00905	0.808763	0.966137
APOA1BP	NM_144772.1	1570725	ILMN_1729533	1	0.108	1.07773	0.393959	0.827888	0.341	1.26663	0.011655	0.072838	0.112	1.08073	0.329376	0.752251	0.233	1.17528	0.003881	0.067078
APOA2	NM_001643.1	6380020	ILMN_1688543	1	0.011	1.00765	0.837491	0.970604	0.001	1.00069	0.983641	0.995567	0.011	1.00765	0.829431	0.96399	-0.01	0.993092	0.86056	0.976321
APOA4	NM_000482.3	3780468	ILMN_1675706	11	0.03	1.02101	0.500104	0.879497	0.067	1.04754	0.190698	0.532559	-0.066	0.955283	0.19209	0.613447	0.037	1.02598	0.415795	0.830431
APOA5	NM_052968.3	1470600	ILMN_1754055	11	-0.058	0.960595	0.196512	0.684973	0.016	1.01115	0.737822	0.924173	-0.076	0.948684	0.128423	0.513606	0.074	1.05263	0.145197	0.581265
APOB	NM_000384.2	240541	ILMN_1664024	2	-0.039	0.973329	0.453238	0.860539	-0.021	0.985549	0.687785	0.904303	0.062	1.04391	0.226233	0.655518	0.018	1.01255	0.715023	0.945275
APOB48R	NM_018690.2	6250241	ILMN_1697925	16	-0.034	0.976709	0.553052	0.898413	-0.008	0.99447	0.886691	0.970169	-0.003	0.997923	0.955548	0.99155	0.026	1.01819	0.608948	0.914899
APOBEC1	NM_001644.3	990438	ILMN_1813881	12	0.018	1.01255	0.648187	0.927919	0.007	1.00486	0.884305	0.969428	0.021	1.01466	0.736799	0.93923	-0.011	0.992404	0.818161	0.968102
APOBEC2	NM_006789.2	3890743	ILMN_1719143	6	-0.072	0.951318	0.247094	0.731053	-0.086	0.942131	0.140841	0.451783	-0.084	0.943438	0.17049	0.58439	-0.014	0.990343	0.803722	0.965144
APOBEC3A	NM_145699.2	7330671	ILMN_1680192	22	-0.056	0.961927	0.185134	0.672312	-0.046	0.968618	0.308432	0.671365	0.018	1.01255	0.702034	0.930971	0.01	1.00696	0.804846	0.965504
APOBEC3B	NM_004900.3	3170068	ILMN_2219466	22	1.051	2.07197	9e-06	0.00403	1.541	2.90996	0	4e-06	0.264	1.2008	0.000392	0.009976	0.491	1.40542	0.005545	0.084157
APOBEC3C	NM_014508.2	3120221	ILMN_1675684	22	0.043	1.03025	0.381746	0.822051	0.15	1.10957	0.019402	0.109661	0.325	1.25266	0.000178	0.005712	0.107	1.07699	0.069983	0.410155
APOBEC3D	NM_152426.3	4760035	ILMN_3307651	22	0.043	1.03025	0.397347	0.829248	0.001	1.00069	0.991482	0.997701	0.016	1.01115	0.794452	0.956054	-0.042	0.971307	0.467851	0.85575
APOBEC3D	NM_152426.2	6350402	ILMN_1661572	22	0	1	0.996423	0.999392	-0.004	0.997231	0.937542	0.984506	0.027	1.01889	0.66236	0.916503	-0.004	0.997231	0.924843	0.988259
APOBEC3F	NM_145298.5	6290743	ILMN_1710726	22	0.505	1.41912	0.000164	0.019293	0.804	1.74594	0	2.6e-05	0.288	1.22095	0.000996	0.01943	0.299	1.23029	0.001856	0.041367
APOBEC3F	NM_145298.5	5340403	ILMN_1702706	22	-0.046	0.968618	0.463314	0.864339	-0.124	0.91764	0.044457	0.208791	-0.113	0.924663	0.115983	0.490644	-0.078	0.94737	0.207399	0.6664
APOBEC3F	NM_001006666.1	610379	ILMN_2412172	22	0.178	1.13131	0.035926	0.356082	0.39	1.31039	0.000312	0.003866	0.106	1.07624	0.08606	0.418087	0.213	1.1591	0.040239	0.300012
APOBEC3F	NM_001006666.1	1410279	ILMN_2296950	22	0.37	1.29235	0.002473	0.087233	0.501	1.41519	4e-06	0.000157	0.149	1.1088	0.015797	0.140599	0.132	1.09581	0.164178	0.611839
APOBEC3G	NM_021822.1	4120369	ILMN_2232478	22	0.454	1.36983	0.001186	0.05765	0.372	1.29415	2.7e-05	0.000586	-0.081	0.945402	0.163355	0.573349	-0.082	0.944747	0.35591	0.796615
APOBEC3G	NM_021822.1	1190026	ILMN_1802106	22	0.376	1.29774	0.00015	0.018322	0.337	1.26313	0.000549	0.006104	0.037	1.02598	0.542356	0.874129	-0.039	0.973329	0.631645	0.922849
APOBEC3H	NM_181773.2	160292	ILMN_1664828	22	0.301	1.232	0.000232	0.023827	0.602	1.51782	0	2.8e-05	0.39	1.31039	3.4e-05	0.001931	0.301	1.232	0.000165	0.009361
APOBEC4	NM_203454.2	7100128	ILMN_1815425	1	0.082	1.05848	0.11441	0.571481	0.004	1.00278	0.931506	0.982932	0.027	1.01889	0.547867	0.876204	-0.077	0.948027	0.171342	0.621682
APOC1	NM_001645.3	3830465	ILMN_1789007	19	-0.01	0.993092	0.881966	0.978152	0.069	1.04899	0.193611	0.536996	-0.071	0.951978	0.250868	0.682308	0.079	1.05629	0.222127	0.682357
APOC2	NM_000483.3	3800403	ILMN_1802923	19	0.084	1.05995	0.170264	0.652268	0.026	1.01819	0.605896	0.868861	0.143	1.1042	0.076669	0.392049	-0.058	0.960595	0.333695	0.782612
APOC3	NM_000040.1	2630010	ILMN_1722070	11	0.016	1.01115	0.771013	0.954139	-0.027	0.981459	0.648677	0.888512	0.013	1.00905	0.781683	0.951406	-0.044	0.969962	0.540377	0.889277
APOC4	NM_001646.1	3440717	ILMN_1765605	19	-0.056	0.961927	0.32289	0.784997	-0.067	0.954621	0.171529	0.503767	-0.015	0.989657	0.750974	0.943762	-0.012	0.991717	0.814195	0.967392
APOD	NM_001647.2	7150634	ILMN_1780170	3	-0.005	0.99654	0.910208	0.984019	0.26	1.19748	0.000454	0.005222	0.378	1.29954	4.3e-05	0.00225	0.265	1.20164	0.00127	0.032426
APOE	NM_000041.2	730414	ILMN_1740938	19	0.049	1.03455	0.388955	0.825481	0.126	1.09126	0.066168	0.27761	0.055	1.03886	0.376384	0.787247	0.077	1.05482	0.169348	0.619603
APOF	NM_001638.2	130400	ILMN_1809311	12	-0.026	0.98214	0.606802	0.916621	0	1	0.997248	0.999368	-0.091	0.938872	0.139208	0.534376	0.026	1.01819	0.568397	0.900992
APOH	NM_000042.2	1740669	ILMN_1761511	17	-0.027	0.981459	0.617859	0.919402	-0.091	0.938872	0.143034	0.455873	-0.045	0.96929	0.406915	0.805625	-0.064	0.956608	0.292369	0.750186
APOL1	NM_145343.1	6370470	ILMN_1688631	22	0.021	1.01466	0.710282	0.942541	-0.007	0.99516	0.904246	0.975377	0.022	1.01537	0.694067	0.928353	-0.028	0.980779	0.587654	0.907868
APOL1	NM_145343.1	4040386	ILMN_1761793	22	-0.005	0.99654	0.940218	0.989951	-0.024	0.983502	0.695524	0.90778	0.094	1.06733	0.186095	0.605484	-0.019	0.986917	0.63472	0.924124
APOL2	NM_145637.1	1570358	ILMN_2325338	22	-0.072	0.951318	0.269753	0.748295	-0.099	0.93368	0.140319	0.450722	-0.098	0.934327	0.116553	0.491741	-0.027	0.981459	0.640453	0.925414
APOL2	NM_030882.2	4040270	ILMN_1706582	22	0.007	1.00486	0.870715	0.976813	0.017	1.01185	0.73016	0.921569	-0.016	0.988971	0.763805	0.946232	0.01	1.00696	0.823645	0.969206
APOL2	NM_145637.1	4880291	ILMN_2248822	22	-0.066	0.955283	0.239029	0.724103	0.028	1.0196	0.581125	0.857391	0.013	1.00905	0.814266	0.960912	0.094	1.06733	0.086278	0.456508
APOL2	NM_145637.1	3370066	ILMN_2325337	22	0.094	1.06733	0.187405	0.674916	0.026	1.01819	0.648178	0.888194	0.061	1.04319	0.254494	0.686646	-0.069	0.953299	0.334904	0.782792
APOL3	NM_014349.2	460327	ILMN_2283195	22	-0.062	0.957935	0.155112	0.632354	0.06	1.04247	0.211059	0.561889	-0.025	0.982821	0.635359	0.907912	0.122	1.08824	0.02112	0.202179
APOL3	NM_145641.1	1980750	ILMN_1756862	22	-0.031	0.978742	0.637444	0.925343	-0.011	0.992404	0.853999	0.961672	0.013	1.00905	0.869013	0.972822	0.02	1.01396	0.723177	0.947623
APOL3	NM_145641.1	4900102	ILMN_2369144	22	-0.056	0.961927	0.403538	0.832061	-0.073	0.950659	0.194722	0.538506	0.046	1.0324	0.411353	0.807807	-0.016	0.988971	0.786497	0.960834
APOL4	NM_030643.3	3400142	ILMN_1779070	22	-0.034	0.976709	0.508225	0.882366	-0.024	0.983502	0.656083	0.891332	-0.055	0.962594	0.315075	0.741696	0.011	1.00765	0.805832	0.965812
APOL4	NM_145660.1	610661	ILMN_1704682	22	0.01	1.00696	0.89666	0.981041	0.018	1.01255	0.765135	0.933438	-0.045	0.96929	0.516853	0.862479	0.008	1.00556	0.901839	0.98423
APOL5	NM_030642.1	6450301	ILMN_1676177	22	0.072	1.05117	0.195162	0.683649	-0.001	0.999307	0.993078	0.998165	0.012	1.00835	0.80023	0.957753	-0.073	0.950659	0.309293	0.76322
APOL6	NM_030641.3	5550397	ILMN_1687201	22	0.07	1.04972	0.295071	0.76678	0.072	1.05117	0.244093	0.603681	0.082	1.05848	0.171808	0.586385	0.001	1.00069	0.981563	0.996844
APOLD1	NM_030817.1	1770364	ILMN_1723522	12	-0.066	0.955283	0.449806	0.858977	-0.251	0.840314	0.001927	0.016955	-0.087	0.941478	0.259018	0.691101	-0.185	0.879649	0.047598	0.330994
APOM	NM_019101.2	3830022	ILMN_1731941	6	-0.06	0.959264	0.291244	0.764169	-0.142	0.906262	0.042483	0.201726	-0.095	0.936272	0.203202	0.627147	-0.082	0.944747	0.194296	0.65048
APOO	NM_024122.2	2690132	ILMN_1721623	X	-0.212	0.86334	0.03679	0.360044	0.005	1.00347	0.944534	0.985875	0.435	1.35191	0.000458	0.011162	0.217	1.16231	0.048247	0.333161
APOOL	NM_198450.3	5090093	ILMN_1777483	X	0.065	1.04608	0.238585	0.724032	0.22	1.16473	0.00407	0.030952	0.184	1.13603	0.006427	0.07412	0.154	1.11265	0.058681	0.372331
APP	NM_201414.1	3370577	ILMN_2404063	21	0.274	1.20916	0.026236	0.307987	0.325	1.25266	0.001294	0.012274	-0.058	0.960595	0.446098	0.826926	0.051	1.03598	0.521433	0.881273
APP	NM_201414.1	650110	ILMN_2404065	21	-0.169	0.889459	0.23857	0.724032	-0.124	0.91764	0.250362	0.61084	0.005	1.00347	0.966098	0.993403	0.045	1.03168	0.605394	0.913993
APP	NM_000484.2	1190735	ILMN_1653283	21	0.029	1.0203	0.566014	0.903367	-0.06	0.959264	0.232749	0.588819	0.021	1.01466	0.695255	0.929133	-0.088	0.940826	0.075616	0.426081
APPBP2	NM_006380.2	5270333	ILMN_2149766	17	-0.163	0.893166	0.241085	0.726438	-0.66	0.632878	2e-06	9.3e-05	-0.373	0.772175	0.001748	0.028883	-0.497	0.708579	0.004643	0.075501
APPBP2	NM_006380.2	1440707	ILMN_1694875	17	-0.169	0.889459	0.025519	0.304253	-0.265	0.832199	0.00086	0.008849	-0.134	0.911301	0.021533	0.174103	-0.096	0.935623	0.185745	0.639118
APPL1	NM_012096.2	5860554	ILMN_1763730	3	-0.249	0.841479	0.019117	0.2639	-0.311	0.806083	0.002652	0.022095	-0.159	0.895646	0.090595	0.429724	-0.063	0.957271	0.385868	0.814507
APPL2	NM_018171.3	4180100	ILMN_1765076	12	-0.169	0.889459	0.1098	0.564368	-0.442	0.736113	2.2e-05	0.000503	-0.334	0.793334	0.002866	0.041176	-0.273	0.827597	0.011201	0.134418
APRIN	NM_015928.1	4780292	ILMN_1686011	13	0.011	1.00765	0.874737	0.977302	-0.068	0.95396	0.230084	0.585806	-0.071	0.951978	0.293828	0.724562	-0.079	0.946714	0.227192	0.686965
APRT	NM_000485.2	6510603	ILMN_1726410	16	0.107	1.07699	0.098374	0.541841	0.017	1.01185	0.78075	0.938706	-0.038	0.974004	0.610557	0.900025	-0.091	0.938872	0.222717	0.682976
APRT	NM_000485.2	160746	ILMN_1722491	16	-0.201	0.869947	0.214887	0.703023	-0.231	0.852044	0.02065	0.11516	0.008	1.00556	0.965862	0.993403	-0.03	0.97942	0.8511	0.974234
APTX	NM_175071.1	6590674	ILMN_1726752	9	0.096	1.06881	0.337338	0.793596	0.611	1.52732	8e-06	0.000249	0.722	1.64947	1e-06	0.000244	0.515	1.42899	0.000711	0.022737
APTX	NM_175069.1	1570138	ILMN_2317348	9	0.21	1.15669	0.030552	0.330638	0.548	1.46206	1.7e-05	0.000427	0.566	1.48041	1.6e-05	0.001216	0.338	1.264	0.001502	0.035889
APTX	NM_017692.2	4150703	ILMN_2260058	9	0.022	1.01537	0.6347	0.924252	-0.002	0.998615	0.967521	0.991313	0.046	1.0324	0.363786	0.778521	-0.024	0.983502	0.654341	0.929877
AQP1	NM_198098.1	450619	ILMN_1681103	7	0.008	1.00556	0.846328	0.972152	0.028	1.0196	0.581191	0.857391	-0.046	0.968618	0.387756	0.79334	0.019	1.01326	0.663909	0.932187
AQP1	NM_198098.1	70338	ILMN_1776857	7	0.078	1.05555	0.165426	0.646722	-0.021	0.985549	0.72104	0.917628	0.073	1.0519	0.209883	0.634452	-0.099	0.93368	0.112878	0.517398
AQP10	NM_080429.2	2340577	ILMN_2090004	1	-0.009	0.993781	0.876146	0.977705	0.004	1.00278	0.944526	0.985875	-0.027	0.981459	0.614071	0.901425	0.013	1.00905	0.842615	0.972993
AQP11	NM_173039.1	780594	ILMN_1762606	11	-0.032	0.978063	0.593268	0.911668	-0.048	0.967276	0.337863	0.698169	0.085	1.06069	0.113313	0.485182	-0.016	0.988971	0.798724	0.964029
AQP12A	NM_198998.1	7150706	ILMN_1757036	2	0.024	1.01677	0.685316	0.937292	0.055	1.03886	0.360693	0.718202	0.1	1.07177	0.050896	0.307699	0.031	1.02172	0.669982	0.93351
AQP12B	NM_001102467.1	1780195	ILMN_3246595	2	0.071	1.05044	0.228396	0.716018	0.265	1.20164	0.001514	0.013975	0.053	1.03742	0.298975	0.728948	0.194	1.14393	0.026048	0.228795
AQP2	NM_000486.3	4480079	ILMN_1732149	12	-0.062	0.957935	0.240708	0.726052	-0.122	0.918913	0.039415	0.190795	-0.061	0.958599	0.298834	0.728911	-0.06	0.959264	0.240057	0.702022
AQP3	NM_004925.3	1050040	ILMN_1651574	9	0.121	1.08749	0.041038	0.379486	0.275	1.20999	0.000259	0.003327	0.038	1.02669	0.604644	0.898	0.154	1.11265	0.023477	0.214654
AQP4	NM_001650.4	2750176	ILMN_1747683	18	-0.073	0.950659	0.219185	0.7069	-0.082	0.944747	0.18293	0.520731	-0.1	0.933033	0.083312	0.410767	-0.01	0.993092	0.859152	0.97591
AQP4	NM_001650.4	2070161	ILMN_1676649	18	0.063	1.04464	0.467887	0.865757	-0.003	0.997923	0.964524	0.991023	-0.016	0.988971	0.793434	0.955863	-0.066	0.955283	0.435363	0.842133
AQP5	NM_001651.1	2810543	ILMN_1807036	12	-0.005	0.99654	0.892071	0.980488	-0.011	0.992404	0.842506	0.958267	0.046	1.0324	0.396807	0.799767	-0.005	0.99654	0.919419	0.987347
AQP6	NM_053286.1	3290168	ILMN_1666519	12	-0.044	0.969962	0.47385	0.868805	-0.044	0.969962	0.458037	0.788886	-0.078	0.94737	0.265914	0.69937	0	1	0.995089	0.999157
AQP6	NM_001652.3	4490678	ILMN_1786381	12	0.03	1.02101	0.681669	0.936081	0.038	1.02669	0.495094	0.81084	0.03	1.02101	0.59255	0.893177	0.008	1.00556	0.919861	0.987469
AQP7	NM_001170.1	5090209	ILMN_1738494	9	0.064	1.04536	0.292974	0.765109	0.109	1.07848	0.135194	0.440467	0.091	1.06511	0.13996	0.535215	0.045	1.03168	0.573404	0.902835
AQP7P1	NR_002817.2	7100022	ILMN_3245829	9	-0.062	0.957935	0.402456	0.831676	0.04	1.02811	0.563669	0.849954	0.115	1.08298	0.121675	0.501721	0.102	1.07326	0.248096	0.711673
AQP7P2	XR_001076.1	2630543	ILMN_1765610	9	-0.047	0.967947	0.512228	0.883655	-0.129	0.914465	0.056005	0.247222	-0.085	0.942785	0.212189	0.638199	-0.082	0.944747	0.19484	0.650696
AQP7P2	NR_002823.1	270647	ILMN_3251648	9	-0.017	0.988286	0.81005	0.964136	0.025	1.01748	0.681234	0.901979	-0.046	0.968618	0.537793	0.872187	0.041	1.02883	0.499207	0.871715
AQP7P2	NR_002823.1	4200494	ILMN_2053902	9	-0.011	0.992404	0.86066	0.975191	-0.076	0.948684	0.19541	0.539518	-0.025	0.982821	0.69987	0.930537	-0.064	0.956608	0.280651	0.740668
AQP7P2	NR_002823.1	5960382	ILMN_1672057	9	-0.017	0.988286	0.738297	0.948668	0.051	1.03598	0.295825	0.658119	0.002	1.00139	0.98172	0.996151	0.068	1.04826	0.207965	0.666785
AQP7P2	XR_001073.1	5720246	ILMN_1751586	9	0.036	1.02527	0.545397	0.894967	-0.035	0.976032	0.520275	0.826607	0.005	1.00347	0.927719	0.985838	-0.071	0.951978	0.2372	0.699114
AQP8	NM_001169.2	2470064	ILMN_1713462	16	0.061	1.04319	0.226018	0.713857	0.042	1.02954	0.401164	0.750842	-0.041	0.971981	0.427719	0.816799	-0.018	0.987601	0.689025	0.939409
AQP9	NM_020980.2	160494	ILMN_1715068	15	0.102	1.07326	0.064106	0.459919	0.027	1.01889	0.594625	0.864092	-0.041	0.971981	0.427886	0.816813	-0.075	0.949342	0.088803	0.462215
AQR	NM_014691.2	2690639	ILMN_1717154	15	0.063	1.04464	0.462443	0.864181	-0.117	0.922103	0.059034	0.256526	-0.208	0.865737	0.003485	0.047286	-0.18	0.882703	0.050888	0.343919
AQR	NM_014691.2	1070546	ILMN_2177460	15	0.019	1.01326	0.67331	0.93426	-0.039	0.973329	0.421059	0.763578	0.023	1.01607	0.639181	0.909042	-0.058	0.960595	0.188584	0.643481
AR	NM_000044.2	3710017	ILMN_1659572	X	-0.088	0.940826	0.080019	0.50313	-0.003	0.997923	0.953904	0.988961	-0.055	0.962594	0.248841	0.679954	0.086	1.06142	0.082256	0.444574
AR	NM_001011645.1	2000494	ILMN_1767351	X	0.061	1.04319	0.181041	0.667801	0.058	1.04102	0.382382	0.735467	-0.024	0.983502	0.701333	0.930971	-0.003	0.997923	0.96728	0.994411
AR	NM_001011645.1	6900072	ILMN_1792540	X	0.062	1.04391	0.211909	0.700548	0.044	1.03097	0.325781	0.68724	0.002	1.00139	0.969633	0.993964	-0.017	0.988286	0.710702	0.944565
ARAF	NM_001654.1	2100576	ILMN_1658883	X	-0.566	0.675487	0.001101	0.055455	-0.627	0.647521	5e-06	0.000176	0.058	1.04102	0.469779	0.839996	-0.061	0.958599	0.505926	0.874769
ARAP1	NM_001040118.2	7560044	ILMN_3269719	11	-0.032	0.978063	0.545275	0.894967	-0.042	0.971307	0.45041	0.783739	-0.045	0.96929	0.398309	0.800647	-0.01	0.993092	0.825625	0.96992
ARAP2	NM_015230.2	3520438	ILMN_3244434	4	-0.008	0.99447	0.910342	0.984019	-0.08	0.946058	0.146524	0.462394	-0.103	0.931095	0.052375	0.313324	-0.071	0.951978	0.364246	0.801619
ARAP2	NM_015230.2	6940497	ILMN_1767541	4	-0.046	0.968618	0.311726	0.778664	0.015	1.01045	0.742501	0.925812	0.08	1.05702	0.222791	0.652044	0.061	1.04319	0.20725	0.666163
ARAP3	NM_022481.5	7380255	ILMN_1812618	5	0.163	1.11961	0.079902	0.503062	0.092	1.06585	0.122572	0.414606	-0.13	0.913831	0.039229	0.261056	-0.071	0.951978	0.416353	0.830914
ARAP3	NM_022481.5	6040097	ILMN_3240997	5	0.013	1.00905	0.889133	0.979699	0.008	1.00556	0.916001	0.979167	-0.09	0.939523	0.254082	0.686275	-0.005	0.99654	0.934339	0.989666
ARC	NM_015193.3	430674	ILMN_1711120	8	-0.062	0.957935	0.325529	0.786382	0.041	1.02883	0.521383	0.827081	0.074	1.05263	0.350636	0.768686	0.103	1.074	0.103553	0.498406
ARCN1	NM_001655.3	2750653	ILMN_1699703	11	-0.29	0.817902	0.081142	0.505743	-0.155	0.898132	0.027807	0.145924	-0.008	0.99447	0.911348	0.982044	0.135	1.09809	0.395024	0.819085
ARD1A	NM_003491.2	6590053	ILMN_1721977	X	0.218	1.16312	0.184875	0.672046	0.309	1.23885	0.006478	0.045424	-0.247	0.842647	0.065809	0.359048	0.092	1.06585	0.585548	0.907281
ARD1B	NM_032693.2	2630184	ILMN_3236351	4	-0.009	0.993781	0.86257	0.975536	0.022	1.01537	0.64412	0.88629	0.064	1.04536	0.196499	0.618348	0.031	1.02172	0.531509	0.885592
AREG	NM_001657.2	6520600	ILMN_1804421	4	-0.024	0.983502	0.681935	0.936104	-0.043	0.970634	0.419261	0.762921	0.007	1.00486	0.891278	0.977634	-0.019	0.986917	0.704943	0.94322
AREGB	XM_001125684.2	990376	ILMN_3236613	4	0.091	1.06511	0.132382	0.600685	0.077	1.05482	0.131839	0.433761	0.025	1.01748	0.632307	0.906979	-0.014	0.990343	0.811988	0.967059
ARF1	NM_001024227.1	3310139	ILMN_1802203	1	-0.017	0.988286	0.930197	0.988495	-0.121	0.91955	0.213974	0.565565	-0.297	0.813943	0.029974	0.219574	-0.103	0.931095	0.580433	0.905364
ARF1	NM_001024228.1	1430259	ILMN_2330948	1	-0.321	0.800515	0.00027	0.025706	-0.371	0.773246	8.7e-05	0.001418	-0.176	0.885154	0.008446	0.090774	-0.05	0.965936	0.340317	0.786597
ARF1	NM_001024226.1	5550491	ILMN_1661458	1	0.053	1.03742	0.323951	0.785679	0.027	1.01889	0.587684	0.860981	-0.092	0.938221	0.117756	0.493951	-0.026	0.98214	0.670405	0.933683
ARF3	NM_001659.1	2680446	ILMN_1682938	12	-0.308	0.807761	0.022423	0.285978	-0.415	0.750019	0.00241	0.020447	-0.308	0.807761	0.052956	0.315404	-0.107	0.928517	0.424261	0.836146
ARF4	NM_001660.2	6770176	ILMN_1719518	3	0.116	1.08373	0.295387	0.76693	0.184	1.13603	0.069703	0.287868	0.094	1.06733	0.395609	0.799193	0.068	1.04826	0.519024	0.880188
ARF4	NM_001660.2	1430136	ILMN_1723884	3	0.292	1.22434	0.010624	0.19257	0.389	1.30949	0.000296	0.0037	0.33	1.25701	0.000984	0.019263	0.097	1.06955	0.377191	0.809908
ARF5	NM_001662.2	3370189	ILMN_1752340	7	-0.057	0.961261	0.588342	0.911044	-0.2	0.870551	0.034523	0.172607	0.089	1.06363	0.365217	0.77949	-0.143	0.905634	0.257535	0.719818
ARF6	NM_001663.2	510300	ILMN_1764297	14	-0.019	0.986917	0.627895	0.922147	-0.005	0.99654	0.912894	0.97781	0.02	1.01396	0.670142	0.918485	0.014	1.00975	0.748892	0.954064
ARFGAP1	NM_175609.1	2710209	ILMN_2406873	20	-0.013	0.99103	0.850897	0.973047	-0.022	0.984866	0.711331	0.913898	-0.056	0.961927	0.412139	0.808258	-0.009	0.993781	0.873795	0.978377
ARFGAP1	NM_018209.2	5900445	ILMN_1675709	20	0.086	1.06142	0.394644	0.82828	0.361	1.28432	0.000866	0.008889	0.061	1.04319	0.438302	0.822753	0.275	1.20999	0.010041	0.12501
ARFGAP2	NM_032389.3	3190066	ILMN_1769250	11	0.17	1.12506	0.329436	0.788711	-0.095	0.936272	0.204353	0.552076	-0.25	0.840896	0.004733	0.059619	-0.265	0.832199	0.126132	0.544886
ARFGAP3	NM_014570.3	5090056	ILMN_1731287	22	-0.256	0.837406	0.003767	0.108933	0.036	1.02527	0.572256	0.853312	0.421	1.33886	0.00066	0.014532	0.292	1.22434	0.000335	0.013956
ARFGAP3	NM_014570.3	3850639	ILMN_2227800	22	0.038	1.02669	0.439626	0.853832	0.011	1.00765	0.819825	0.950665	0.014	1.00975	0.799315	0.957656	-0.027	0.981459	0.513692	0.877703
ARFGEF1	NM_006421.3	6100524	ILMN_1728471	8	-0.061	0.958599	0.474882	0.869161	-0.377	0.770037	0.000229	0.003034	-0.404	0.75576	8.9e-05	0.003585	-0.316	0.803294	0.005761	0.086049
ARFGEF1	NM_006421.3	3710681	ILMN_2221408	8	-0.064	0.956608	0.38488	0.823738	-0.187	0.87843	0.014623	0.087162	-0.15	0.90125	0.031424	0.22682	-0.123	0.918276	0.081024	0.441243
ARFGEF2	NM_006420.2	3610554	ILMN_1789990	20	0.133	1.09657	0.081242	0.505841	0.033	1.02314	0.597117	0.865321	0.022	1.01537	0.730575	0.937488	-0.101	0.932386	0.071244	0.4138
ARFIP1	NM_001025593.1	10753	ILMN_2403906	4	-0.329	0.796088	0.053542	0.429685	-0.37	0.773782	0.000104	0.001638	-0.149	0.901875	0.057123	0.329919	-0.042	0.971307	0.783537	0.960158
ARFIP1	NM_001025595.1	4220484	ILMN_1768399	4	-0.024	0.983502	0.646766	0.92771	-0.166	0.89131	0.00881	0.058178	-0.102	0.93174	0.119916	0.498112	-0.142	0.906262	0.009003	0.116195
ARFIP1	NM_001025593.1	2060630	ILMN_2403911	4	0.161	1.11806	0.028944	0.323627	-0.037	0.97468	0.436161	0.773472	0.056	1.03958	0.286256	0.717588	-0.198	0.871758	0.014269	0.157382
ARFIP2	NM_012402.2	870082	ILMN_1750690	11	0.018	1.01255	0.702309	0.940627	0.03	1.02101	0.629709	0.880249	0.069	1.04899	0.231266	0.662153	0.012	1.00835	0.845292	0.973507
ARFRP1	NM_003224.2	6110520	ILMN_1703989	20	0.016	1.01115	0.725286	0.94609	-0.013	0.99103	0.791143	0.942015	-0.127	0.915734	0.04417	0.281615	-0.029	0.980099	0.54781	0.892008
ARG1	NM_000045.2	5270753	ILMN_1812281	6	-0.026	0.98214	0.639656	0.925701	-0.079	0.946714	0.188306	0.528566	-0.021	0.985549	0.697328	0.92993	-0.052	0.964598	0.330356	0.780408
ARG2	NM_001172.3	5720725	ILMN_1800898	14	0.157	1.11497	0.005738	0.138348	0.405	1.32409	0.000497	0.00562	0.503	1.41716	0.000182	0.005804	0.248	1.18756	0.022356	0.208775
ARG99	NM_031920.2	4570735	ILMN_1707529	12	0.003	1.00208	0.951989	0.991863	0.07	1.04972	0.189864	0.53095	0.064	1.04536	0.285339	0.716795	0.067	1.04754	0.167172	0.616604
ARGFX	NM_001012659.1	7330307	ILMN_1716068	3	0.001	1.00069	0.978877	0.996214	-0.036	0.975355	0.475654	0.79914	-0.004	0.997231	0.948798	0.989976	-0.038	0.974004	0.3596	0.799097
ARGFXP2	NR_002222.1	2340537	ILMN_2095571	17	-0.002	0.998615	0.969088	0.994698	-0.042	0.971307	0.542235	0.838412	0	1	0.996869	0.999532	-0.039	0.973329	0.512565	0.877366
ARGFXP2	NR_002222.1	5720176	ILMN_1814353	17	0.041	1.02883	0.450705	0.859568	-0.037	0.97468	0.42155	0.763932	0.155	1.11342	0.03033	0.220965	-0.078	0.94737	0.1709	0.621009
ARGLU1	NM_018011.3	4880132	ILMN_1788468	13	-0.109	0.927231	0.248014	0.731571	-0.095	0.936272	0.310148	0.673051	-0.175	0.885768	0.116177	0.491005	0.014	1.00975	0.877071	0.979114
ARHGAP1	NM_004308.2	6480082	ILMN_1732060	11	-0.023	0.984184	0.697176	0.939617	-0.08	0.946058	0.146389	0.462238	0.016	1.01115	0.779785	0.9508	-0.057	0.961261	0.311314	0.764596
ARHGAP10	NM_024605.3	2000669	ILMN_1736112	4	-0.129	0.914465	0.212225	0.700821	-0.221	0.857971	0.033678	0.169456	-0.205	0.867539	0.055797	0.32563	-0.093	0.937571	0.097169	0.483218
ARHGAP11A	NM_014783.2	990121	ILMN_1744830	15	-0.064	0.956608	0.300271	0.770666	-0.222	0.857376	0.003415	0.026876	-0.169	0.889459	0.017971	0.153381	-0.159	0.895646	0.040957	0.303038
ARHGAP11A	NM_199357.1	5700403	ILMN_1673815	15	0.032	1.02243	0.506133	0.881269	0.009	1.00626	0.859897	0.963351	-0.018	0.987601	0.737314	0.939467	-0.023	0.984184	0.66492	0.932277
ARHGAP11A	NM_199357.1	4180537	ILMN_2395913	15	0.014	1.00975	0.844461	0.971757	0.02	1.01396	0.744308	0.926011	0.006	1.00417	0.921793	0.984539	0.006	1.00417	0.897181	0.983304
ARHGAP11B	NM_001039841.1	6060050	ILMN_2215881	15	-0.008	0.99447	0.890946	0.980094	-0.047	0.967947	0.312862	0.675784	-0.121	0.91955	0.021203	0.172276	-0.039	0.973329	0.523461	0.882572
ARHGAP12	NM_018287.5	5490612	ILMN_1753500	10	-0.241	0.846159	0.225074	0.712799	-0.618	0.651574	0.000242	0.003151	-0.32	0.80107	0.026442	0.201179	-0.376	0.770571	0.028658	0.244188
ARHGAP12	NM_018287.4	5340747	ILMN_2101810	10	-0.072	0.951318	0.272423	0.75018	-0.131	0.913198	0.062885	0.268133	-0.165	0.891929	0.022965	0.182433	-0.059	0.959929	0.253554	0.716219
ARHGAP15	NM_018460.2	3310463	ILMN_2208413	2	0.053	1.03742	0.278427	0.755392	0.066	1.04681	0.174159	0.507632	0.117	1.08448	0.052853	0.315028	0.013	1.00905	0.783012	0.960093
ARHGAP17	NM_018054.4	160561	ILMN_1718610	16	0.278	1.21251	0.113732	0.570851	0.222	1.16635	0.010454	0.066726	-0.176	0.885154	0.083202	0.410542	-0.057	0.961261	0.711742	0.944702
ARHGAP17	NM_001006634.1	6590564	ILMN_1756693	16	-0.025	0.982821	0.54686	0.895324	-0.03	0.97942	0.533919	0.834058	0.025	1.01748	0.768741	0.946966	-0.004	0.997231	0.926359	0.988592
ARHGAP17	NM_018054.4	3170520	ILMN_2398847	16	-0.011	0.992404	0.82407	0.967676	-0.085	0.942785	0.197017	0.541879	0.062	1.04391	0.263269	0.696339	-0.074	0.95	0.239974	0.701932
ARHGAP18	NM_033515.2	3140445	ILMN_1791186	6	0.381	1.30224	0.00524	0.131636	0.027	1.01889	0.768078	0.934836	-0.309	0.807201	0.000211	0.006434	-0.355	0.78187	0.022522	0.209698
ARHGAP19	NM_032900.4	6110332	ILMN_1688953	10	-0.024	0.983502	0.777773	0.955507	-0.73	0.602904	4e-06	0.000138	-0.54	0.687771	8e-06	0.000762	-0.707	0.612593	0.000204	0.010394
ARHGAP20	NM_020809.2	6480593	ILMN_1782761	11	-0.039	0.973329	0.577276	0.906849	-0.042	0.971307	0.539905	0.836952	-0.043	0.970634	0.523019	0.866005	-0.003	0.997923	0.956858	0.993014
ARHGAP21	NM_020824.2	1260543	ILMN_1811592	10	-0.377	0.770037	0.002748	0.092192	-0.646	0.63905	2e-06	8e-05	-0.398	0.75891	1.2e-05	0.000985	-0.269	0.829895	0.027728	0.238889
ARHGAP22	NM_021226.2	510520	ILMN_1676361	10	0.208	1.15509	0.085087	0.514028	0.169	1.12428	0.01541	0.090798	-0.121	0.91955	0.104613	0.464784	-0.039	0.973329	0.686252	0.938395
ARHGAP23	XM_936596.1	5910367	ILMN_1673224		-0.044	0.969962	0.372411	0.816097	-0.058	0.960595	0.320132	0.682201	-0.072	0.951318	0.17523	0.591156	-0.015	0.989657	0.779407	0.959289
ARHGAP23	XM_290799.6	4590706	ILMN_1672742	17	-0.041	0.971981	0.39591	0.828769	0.002	1.00139	0.971858	0.992487	-0.008	0.99447	0.887383	0.977168	0.043	1.03025	0.362653	0.800836
ARHGAP23	XM_290799.7	4210630	ILMN_1764571	17	0.192	1.14235	0.011187	0.197912	0.612	1.52838	0	1.4e-05	0.471	1.38607	0.010488	0.105145	0.42	1.33793	0.000126	0.007748
ARHGAP24	NM_031305.2	10239	ILMN_1775441	4	-0.058	0.960595	0.365064	0.810958	-0.03	0.97942	0.614916	0.873104	-0.081	0.945402	0.231427	0.662394	0.028	1.0196	0.558673	0.896515
ARHGAP24	NM_001025616.2	2260538	ILMN_1765876	4	-0.028	0.980779	0.588223	0.911038	0.034	1.02385	0.549952	0.842642	0.013	1.00905	0.82297	0.96203	0.062	1.04391	0.272544	0.734465
ARHGAP24	NM_001042669.1	130008	ILMN_2352633	4	0.04	1.02811	0.534941	0.891026	0.112	1.08073	0.055654	0.246226	0.071	1.05044	0.281687	0.713385	0.072	1.05117	0.225455	0.685443
ARHGAP24	NM_031305.2	4290243	ILMN_1801833	4	0.031	1.02172	0.509348	0.882585	0.103	1.074	0.111562	0.392019	0.098	1.07029	0.166973	0.579314	0.072	1.05117	0.243316	0.705492
ARHGAP25	NM_014882.2	6520196	ILMN_1661971	2	-0.028	0.980779	0.493859	0.878134	-0.003	0.997923	0.958925	0.989847	-0.054	0.963262	0.301124	0.731026	0.025	1.01748	0.610522	0.915222
ARHGAP25	NM_014882.2	3850148	ILMN_1777998	2	-0.026	0.98214	0.606607	0.916621	0.041	1.02883	0.462906	0.791412	0.008	1.00556	0.908891	0.981775	0.067	1.04754	0.241012	0.703393
ARHGAP25	NM_001007231.1	5290523	ILMN_1658853	2	-0.015	0.989657	0.720022	0.944457	0.006	1.00417	0.898808	0.973367	0.045	1.03168	0.327972	0.751765	0.021	1.01466	0.63163	0.922849
ARHGAP26	NM_015071.3	6350706	ILMN_1711490	5	-0.041	0.971981	0.386513	0.82412	-0.076	0.948684	0.123264	0.415975	-0.031	0.978742	0.541723	0.873657	-0.035	0.976032	0.484884	0.863988
ARHGAP27	NM_199282.1	1260239	ILMN_2103362	17	-0.107	0.928517	0.064245	0.460003	-0.167	0.890693	0.003413	0.026862	0.03	1.02101	0.514019	0.860849	-0.06	0.959264	0.250741	0.714452
ARHGAP28	NM_001010000.1	5810458	ILMN_1796772	18	-0.048	0.967276	0.465548	0.86518	0.049	1.03455	0.380969	0.73404	0.014	1.00975	0.799392	0.957683	0.097	1.06955	0.14391	0.578549
ARHGAP28	NM_001010000.1	510575	ILMN_2290204	18	0.039	1.0274	0.400756	0.83115	0.093	1.06659	0.09825	0.362476	0.022	1.01537	0.661533	0.91621	0.054	1.03814	0.310411	0.763866
ARHGAP28	NM_030672.2	1850521	ILMN_1731178	18	-0.039	0.973329	0.339165	0.794888	0.019	1.01326	0.67361	0.898441	0.023	1.01607	0.602123	0.897293	0.058	1.04102	0.204147	0.66308
ARHGAP28	NM_030672.2	4670753	ILMN_1797753	18	0.006	1.00417	0.894355	0.980896	0.006	1.00417	0.894836	0.97241	0.025	1.01748	0.650773	0.913111	0	1	0.997999	0.999507
ARHGAP29	NM_004815.3	7000390	ILMN_1751474	1	0.169	1.12428	0.060671	0.449536	0.047	1.03311	0.330553	0.692489	-0.113	0.924663	0.044494	0.282794	-0.122	0.918913	0.139103	0.569959
ARHGAP30	NM_001025598.1	1440634	ILMN_1750805	1	-0.025	0.982821	0.623725	0.920578	-0.004	0.997231	0.937391	0.984418	-0.029	0.980099	0.543421	0.874537	0.021	1.01466	0.676639	0.935594
ARHGAP30	NM_001025598.1	7650747	ILMN_1751164	1	-0.011	0.992404	0.844147	0.971738	0.005	1.00347	0.922136	0.980736	0.021	1.01466	0.657024	0.915213	0.016	1.01115	0.791939	0.962055
ARHGAP30	NM_181720.2	4390441	ILMN_2408851	1	-0.015	0.989657	0.823211	0.96757	0.192	1.14235	0.005144	0.037552	0.129	1.09354	0.052228	0.312955	0.207	1.15429	0.008367	0.110974
ARHGAP4	NM_001666.2	7200240	ILMN_1770824	X	0.109	1.07848	0.189884	0.676842	-0.217	0.860353	0.011544	0.072264	-0.269	0.829895	0.003066	0.043111	-0.326	0.797745	0.000958	0.02725
ARHGAP5	NM_001173.2	2570605	ILMN_2322747	14	-0.037	0.97468	0.593357	0.911668	0.003	1.00208	0.948029	0.986958	0.017	1.01185	0.735922	0.939113	0.041	1.02883	0.561587	0.897978
ARHGAP6	NM_013423.2	3130646	ILMN_1806655	X	0.03	1.02101	0.484847	0.873569	-0.005	0.99654	0.92151	0.98065	-0.038	0.974004	0.4675	0.838742	-0.035	0.976032	0.388714	0.815972
ARHGAP6	NM_013423.2	620364	ILMN_1673358	X	-0.055	0.962594	0.395088	0.82828	-0.011	0.992404	0.861213	0.963393	-0.035	0.976032	0.59043	0.892064	0.044	1.03097	0.45345	0.850115
ARHGAP6	NM_013422.2	130653	ILMN_2388746	X	-0.006	0.99585	0.909047	0.983696	-0.016	0.988971	0.768175	0.934836	-0.003	0.997923	0.963969	0.99319	-0.01	0.993092	0.816456	0.96779
ARHGAP6	NM_001174.3	830187	ILMN_1732641	X	-0.067	0.954621	0.273023	0.750954	-0.026	0.98214	0.619639	0.875237	0.022	1.01537	0.701668	0.930971	0.041	1.02883	0.463579	0.854039
ARHGAP8	NM_001017526.1	7550403	ILMN_2297096	22	-0.085	0.942785	0.083565	0.511288	-0.146	0.903753	0.007093	0.048843	-0.048	0.967276	0.282085	0.713863	-0.061	0.958599	0.212499	0.671501
ARHGAP8	NM_181335.2	60551	ILMN_2342851	22	0.108	1.07773	0.053998	0.431876	-0.004	0.997231	0.942965	0.985192	0.003	1.00208	0.961023	0.992491	-0.111	0.925946	0.052293	0.349308
ARHGAP8	NM_001017526.1	6760482	ILMN_2412475	22	0.098	1.07029	0.042453	0.386223	0.214	1.1599	0.012311	0.07594	0.087	1.06216	0.234643	0.665611	0.116	1.08373	0.164584	0.612358
ARHGAP9	NM_001080156.1	2650594	ILMN_2382657	12	-0.05	0.965936	0.379413	0.821025	0.009	1.00626	0.857708	0.962652	-0.055	0.962594	0.324737	0.748634	0.059	1.04174	0.292165	0.750022
ARHGAP9	NM_001080157.1	110180	ILMN_1663916	12	0.032	1.02243	0.70151	0.940479	0.125	1.09051	0.12218	0.413662	0.063	1.04464	0.409131	0.806297	0.093	1.06659	0.105709	0.503157
ARHGDIA	NM_004309.3	4760255	ILMN_1734742	17	-0.425	0.744839	0.187152	0.674601	-0.362	0.778085	0.025399	0.135696	-0.025	0.982821	0.861035	0.971088	0.063	1.04464	0.81645	0.96779
ARHGDIB	NM_001175.4	1570193	ILMN_1678143	12	-0.077	0.948027	0.471243	0.867563	-0.077	0.948027	0.282642	0.644953	-0.224	0.856188	0.001295	0.023467	0.001	1.00069	0.996016	0.999359
ARHGDIG	NM_001176.2	4180377	ILMN_2049274	16	0.031	1.02172	0.651181	0.928721	-0.02	0.986233	0.678281	0.90082	-0.045	0.96929	0.379547	0.788727	-0.051	0.965267	0.451043	0.849096
ARHGDIG	NM_001176.1	6650653	ILMN_1711278	16	0.033	1.02314	0.417177	0.840645	0.029	1.0203	0.504815	0.816698	0.014	1.00975	0.772024	0.948523	-0.004	0.997231	0.931626	0.989221
ARHGEF1	NM_199002.1	2490672	ILMN_2293131	19	0.002	1.00139	0.974605	0.995513	-0.014	0.990343	0.829802	0.954811	-0.008	0.99447	0.903873	0.980585	-0.016	0.988971	0.789411	0.961224
ARHGEF1	NM_004706.3	870324	ILMN_1772370	19	-0.281	0.82302	0.021806	0.281282	-0.267	0.831046	0.000274	0.003475	0.035	1.02456	0.606348	0.898281	0.014	1.00975	0.889561	0.981572
ARHGEF1	NM_199002.1	3180736	ILMN_2405129	19	-0.101	0.932386	0.293671	0.76551	-0.057	0.961261	0.271761	0.632955	0.205	1.15269	0.024477	0.190739	0.044	1.03097	0.634116	0.923903
ARHGEF10	NM_014629.2	6900703	ILMN_2132809	8	-0.313	0.804966	0.016071	0.240601	-0.684	0.622437	1e-06	5.1e-05	-0.534	0.690637	1e-05	0.000843	-0.37	0.773782	0.009933	0.123923
ARHGEF10L	NM_001011722.2	5550170	ILMN_2389445	1	-0.025	0.982821	0.593679	0.911787	-0.006	0.99585	0.895439	0.972466	-0.094	0.936921	0.074269	0.385499	0.019	1.01326	0.681947	0.936964
ARHGEF10L	NM_018125.3	730561	ILMN_1689770	1	0.024	1.01677	0.695446	0.939335	-0.009	0.993781	0.879576	0.968305	-0.076	0.948684	0.174336	0.590158	-0.033	0.977386	0.601803	0.913025
ARHGEF10L	NM_018125.3	70048	ILMN_1727205	1	-0.009	0.993781	0.869592	0.976678	-0.007	0.99516	0.911204	0.977601	0.028	1.0196	0.756725	0.944823	0.002	1.00139	0.965898	0.994311
ARHGEF11	NM_014784.2	6520594	ILMN_2347380	1	0.044	1.03097	0.377045	0.819297	0.001	1.00069	0.983233	0.995479	-0.038	0.974004	0.463505	0.837037	-0.043	0.970634	0.469883	0.85632
ARHGEF11	NM_014784.2	7150070	ILMN_1733861	1	-0.074	0.95	0.372227	0.816097	-0.155	0.898132	0.034323	0.172007	0.014	1.00975	0.799399	0.957683	-0.081	0.945402	0.408479	0.826801
ARHGEF11	NM_198236.1	2510594	ILMN_1656546	1	-0.013	0.99103	0.783292	0.95701	0.014	1.00975	0.770796	0.935851	0.041	1.02883	0.516645	0.862444	0.027	1.01889	0.513413	0.877639
ARHGEF12	NM_015313.1	5270193	ILMN_1810712	11	0.073	1.0519	0.215693	0.703968	0.05	1.03526	0.4805	0.801873	-0.041	0.971981	0.55053	0.877609	-0.023	0.984184	0.746548	0.953787
ARHGEF15	NM_173728.2	3610601	ILMN_1792571	17	0.029	1.0203	0.565509	0.903367	-0.007	0.99516	0.870267	0.965675	-0.007	0.99516	0.880986	0.975852	-0.037	0.97468	0.458456	0.85201
ARHGEF16	NM_014448.2	1030753	ILMN_1669928	1	0.167	1.12272	0.290498	0.763827	-0.074	0.95	0.373251	0.727977	-0.1	0.933033	0.121588	0.501535	-0.241	0.846159	0.177338	0.629179
ARHGEF17	NM_014786.2	1660020	ILMN_1754562	11	-0.091	0.938872	0.079539	0.502443	-0.043	0.970634	0.351644	0.709799	-0.051	0.965267	0.384211	0.791329	0.049	1.03455	0.33026	0.780338
ARHGEF18	NM_015318.2	6130725	ILMN_1664016	19	0.229	1.17202	0.164047	0.644258	0.212	1.15829	0.025528	0.136213	-0.079	0.946714	0.363618	0.778373	-0.017	0.988286	0.915613	0.98648
ARHGEF19	NM_153213.3	6250546	ILMN_1808999	1	0.815	1.7593	0.00074	0.044702	0.695	1.61888	1e-06	4.1e-05	0.102	1.07326	0.141743	0.538375	-0.121	0.91955	0.445834	0.846885
ARHGEF2	NM_004723.2	4120411	ILMN_1703477	1	0.193	1.14314	0.027868	0.317693	-0.378	0.769504	3.2e-05	0.000659	-0.242	0.845572	0.000435	0.01077	-0.571	0.67315	0.0001	0.006882
ARHGEF3	NM_019555.1	6250435	ILMN_1781010	3	-0.023	0.984184	0.752765	0.951374	0.508	1.42208	7e-06	0.000223	0.331	1.25788	0.001492	0.025868	0.531	1.44493	0.000172	0.0095
ARHGEF4	NM_015320.2	3850333	ILMN_1666076	2	-0.252	0.839731	0.011175	0.197912	-0.366	0.775931	8e-06	0.00024	-0.165	0.891929	0.020214	0.16643	-0.114	0.924023	0.163086	0.610296
ARHGEF4	NM_032995.1	6250370	ILMN_2342282	2	0.003	1.00208	0.940556	0.989971	-0.045	0.96929	0.32746	0.689279	-0.052	0.964598	0.294718	0.725214	-0.049	0.966606	0.288447	0.746368
ARHGEF5	NM_005435.3	4150356	ILMN_1708093	7	0.23	1.17283	0.001692	0.070462	0.31	1.23971	0.000127	0.001908	-0.047	0.967947	0.415233	0.809955	0.08	1.05702	0.172488	0.623005
ARHGEF5L	NM_001003702.1	1030646	ILMN_2214473	7	0.117	1.08448	0.214614	0.70289	0.343	1.26839	0.000145	0.002113	0.201	1.14949	0.007406	0.082521	0.226	1.16959	0.034818	0.275861
ARHGEF6	NM_004840.2	770703	ILMN_1803423	X	0.083	1.05922	0.393622	0.827791	-0.021	0.985549	0.783263	0.939566	-0.116	0.922742	0.161104	0.569323	-0.104	0.93045	0.295534	0.752685
ARHGEF7	NM_145735.1	5340484	ILMN_1798587	13	-0.002	0.998615	0.978119	0.996164	-0.032	0.978063	0.591869	0.862975	-0.034	0.976709	0.572595	0.88647	-0.03	0.97942	0.592726	0.909698
ARHGEF7	NM_145735.1	1430379	ILMN_2235679	13	0.057	1.0403	0.240848	0.726059	0.06	1.04247	0.314215	0.676752	-0.027	0.981459	0.618825	0.903579	0.004	1.00278	0.949779	0.991593
ARHGEF7	NM_003899.2	2320445	ILMN_1675984	13	0.011	1.00765	0.855174	0.974064	-0.022	0.984866	0.686388	0.903746	-0.01	0.993092	0.866166	0.972359	-0.033	0.977386	0.519342	0.880356
ARHGEF7	NM_003899.2	510554	ILMN_1796912	13	-0.07	0.952638	0.322439	0.784843	-0.478	0.717972	4e-06	0.000156	-0.503	0.705638	8e-06	0.000762	-0.408	0.753667	0.000196	0.010194
ARHGEF9	NM_015185.1	1070196	ILMN_1779370	X	0.028	1.0196	0.606962	0.916621	-0.007	0.99516	0.909022	0.977009	-0.019	0.986917	0.733403	0.93834	-0.035	0.976032	0.606282	0.91405
ARID1A	NM_139135.2	6280411	ILMN_1797341	1	0.382	1.30315	0.167823	0.64938	-0.403	0.756284	0.001058	0.010454	-0.614	0.653383	3.9e-05	0.002114	-0.786	0.57995	0.012745	0.147208
ARID1A	NM_006015.4	2030471	ILMN_1734496	1	0.069	1.04899	0.273561	0.751501	0.085	1.06069	0.134819	0.439591	0.084	1.05995	0.182741	0.6019	0.016	1.01115	0.788796	0.961143
ARID1B	NM_175863.2	6480289	ILMN_2415357	6	0.014	1.00975	0.729861	0.946873	0.003	1.00208	0.941835	0.985062	0.008	1.00556	0.86674	0.972359	-0.011	0.992404	0.803748	0.965144
ARID1B	NM_175863.2	7200717	ILMN_1660433	6	-0.007	0.99516	0.890504	0.979986	0.072	1.05117	0.278794	0.640718	0.063	1.04464	0.292483	0.723001	0.078	1.05555	0.28817	0.746291
ARID2	NM_152641.2	7100044	ILMN_2182335	12	0.01	1.00696	0.868872	0.976498	-0.037	0.97468	0.450665	0.783998	-0.21	0.864537	0.003202	0.044525	-0.047	0.967947	0.451048	0.849096
ARID2	NM_152641.2	4920463	ILMN_1795247	12	0.022	1.01537	0.802668	0.962192	-0.145	0.904379	0.043467	0.205203	-0.203	0.868742	0.016306	0.143599	-0.167	0.890693	0.120621	0.532606
ARID3A	NM_005224.2	6510553	ILMN_1670130	19	0.414	1.33237	0.000213	0.022525	0.447	1.3632	3.5e-05	0.000715	0.14	1.10191	0.083677	0.411926	0.032	1.02243	0.635533	0.924222
ARID3B	NM_006465.2	5960670	ILMN_1696956	15	0.176	1.12975	0.101182	0.548512	0.166	1.12194	0.038639	0.187943	-0.068	0.95396	0.384532	0.791605	-0.01	0.993092	0.917942	0.987128
ARID3C	NM_001017363.1	3120634	ILMN_1757626	9	-0.071	0.951978	0.102665	0.551728	-0.065	0.955945	0.162616	0.488789	-0.03	0.97942	0.520064	0.864453	0.006	1.00417	0.880224	0.979493
ARID4A	NM_023001.2	7160440	ILMN_1810229	14	0.006	1.00417	0.904326	0.982899	0	1	0.99605	0.998904	-0.075	0.949342	0.234884	0.665783	-0.007	0.99516	0.899234	0.983748
ARID4A	NM_023000.2	2510368	ILMN_2338447	14	0.076	1.05409	0.119856	0.581045	-0.039	0.973329	0.476494	0.799715	0.063	1.04464	0.221848	0.651022	-0.114	0.924023	0.057412	0.368019
ARID4A	NM_002892.3	2600402	ILMN_1676626	14	0.121	1.08749	0.051963	0.423257	0.069	1.04899	0.367798	0.723859	0.104	1.07475	0.127886	0.512684	-0.052	0.964598	0.481204	0.861462
ARID4B	NM_016374.5	2470603	ILMN_2269564	1	-0.081	0.945402	0.474885	0.869161	-0.21	0.864537	0.049242	0.225009	-0.198	0.871758	0.040718	0.267414	-0.128	0.915099	0.195365	0.651368
ARID4B	NM_016374.5	2940722	ILMN_1761334	1	-0.088	0.940826	0.134743	0.60484	-0.036	0.975355	0.476181	0.79956	-0.012	0.991717	0.811424	0.960583	0.052	1.0367	0.372657	0.807208
ARID4B	NM_016374.5	6590722	ILMN_2362982	1	0.076	1.05409	0.182345	0.669359	0.037	1.02598	0.540249	0.83723	-0.006	0.99585	0.916628	0.983455	-0.039	0.973329	0.555969	0.895052
ARID5A	NM_212481.1	4850014	ILMN_2298567	2	-0.035	0.976032	0.582195	0.908762	-0.071	0.951978	0.300167	0.662914	-0.036	0.975355	0.576369	0.887282	-0.036	0.975355	0.481399	0.861663
ARID5A	NM_212481.1	7200301	ILMN_2415157	2	0.021	1.01466	0.760752	0.952769	-0.009	0.993781	0.849697	0.959861	0.008	1.00556	0.883329	0.976562	-0.029	0.980099	0.674025	0.934773
ARID5A	NM_212481.1	160554	ILMN_1689700	2	-0.038	0.974004	0.430088	0.848066	-0.011	0.992404	0.836829	0.956711	0.024	1.01677	0.72639	0.936587	0.026	1.01819	0.604554	0.91362
ARID5B	NM_032199.1	1410408	ILMN_1721626	10	0.584	1.499	5.8e-05	0.011063	0.393	1.31312	2.3e-05	0.00053	0.324	1.2518	0.000248	0.007209	-0.191	0.875998	0.020017	0.195532
ARIH1	NM_005744.2	6560433	ILMN_1694219	15	0.047	1.03311	0.648794	0.927919	0.27	1.20581	0.000703	0.007509	0.47	1.38511	5e-06	0.000551	0.223	1.16716	0.067665	0.403617
ARIH2	NM_006321.2	1010682	ILMN_1792825	3	0.554	1.46815	0.042166	0.384509	0.045	1.03168	0.418366	0.762465	-0.31	0.806642	0.000402	0.010187	-0.509	0.702709	0.052379	0.349398
ARL1	NM_001177.3	4860468	ILMN_1813091	12	0.027	1.01889	0.757374	0.952179	-0.309	0.807201	0.000637	0.006907	-0.047	0.967947	0.466152	0.837881	-0.336	0.792235	0.003193	0.058699
ARL10	NM_173664.4	5270053	ILMN_1769168	5	-0.05	0.965936	0.312527	0.77939	-0.034	0.976709	0.531465	0.832727	0.049	1.03455	0.320619	0.745528	0.016	1.01115	0.777209	0.958543
ARL11	NM_138450.4	3360138	ILMN_1808383	13	0.012	1.00835	0.852037	0.97346	-0.011	0.992404	0.859378	0.963351	0.017	1.01185	0.724148	0.936209	-0.023	0.984184	0.764799	0.957451
ARL13A	NM_001012990.2	4730291	ILMN_1777550	X	-0.044	0.969962	0.403975	0.832169	-0.099	0.93368	0.079976	0.315631	0.01	1.00696	0.877196	0.974879	-0.055	0.962594	0.229022	0.688579
ARL13B	NM_144996.2	4480722	ILMN_2403047	3	-0.24	0.846745	0.007643	0.162603	-0.314	0.804408	0.00013	0.001939	-0.059	0.959929	0.465242	0.837805	-0.074	0.95	0.237706	0.699687
ARL13B	NM_182896.1	5050471	ILMN_1777301	3	-0.068	0.95396	0.27381	0.751793	-0.114	0.924023	0.042806	0.202913	0.002	1.00139	0.975551	0.995023	-0.046	0.968618	0.404833	0.824914
ARL14	NM_025047.1	3400209	ILMN_2232463	3	0.064	1.04536	0.22178	0.709307	0.019	1.01326	0.748605	0.927739	0.093	1.06659	0.129273	0.515194	-0.045	0.96929	0.478249	0.860269
ARL15	NM_019087.1	2140605	ILMN_1774161	5	-0.044	0.969962	0.370229	0.814593	0.127	1.09202	0.031646	0.161386	0.083	1.05922	0.281142	0.712881	0.172	1.12662	0.005592	0.084649
ARL15	NM_019087.1	5670494	ILMN_2202967	5	0.028	1.0196	0.69317	0.939023	0.13	1.09429	0.071762	0.293796	0.09	1.06437	0.289711	0.720743	0.102	1.07326	0.044057	0.316179
ARL16	NM_001040025.1	7050500	ILMN_1679917	17	-0.317	0.802737	0.012152	0.207845	-0.09	0.939523	0.331345	0.69298	-0.142	0.906262	0.154973	0.558972	0.227	1.1704	0.009514	0.120436
ARL16	NM_001040025.1	990154	ILMN_2188119	17	0.357	1.28076	0.145414	0.621093	1.865	3.64268	1e-06	4.5e-05	0.037	1.02598	0.85081	0.968802	1.507	2.84218	7.7e-05	0.005808
ARL17B	NM_001103154.1	3360286	ILMN_3231952	17	-0.17	0.888843	0.009888	0.185181	-0.229	0.853226	0.001291	0.012253	-0.183	0.880869	0.00719	0.080756	-0.059	0.959929	0.20092	0.659348
ARL17B	NM_001039083.3	6200433	ILMN_3181503	17	-0.08	0.946058	0.149776	0.627043	0.041	1.02883	0.414565	0.760223	-0.009	0.993781	0.86657	0.972359	0.121	1.08749	0.032105	0.262273
ARL17B	NM_001039083.3	3710195	ILMN_3231502	17	0.033	1.02314	0.480119	0.871138	0.2	1.1487	0.001457	0.01351	0.009	1.00626	0.917961	0.983548	0.166	1.12194	0.005001	0.079089
ARL17P1	NM_016632.1	6560307	ILMN_1698680	17	0.051	1.03598	0.578754	0.90748	-0.032	0.978063	0.703179	0.910756	-0.041	0.971981	0.656771	0.915194	-0.082	0.944747	0.087265	0.458856
ARL2	NM_001667.2	3290739	ILMN_1787879	11	0.439	1.35566	0.087434	0.51964	0.062	1.04391	0.496081	0.811501	-0.368	0.774856	0.003701	0.049369	-0.378	0.769504	0.106101	0.50396
ARL2BP	NM_012106.3	2570523	ILMN_1755391	16	0.063	1.04464	0.528987	0.889786	0.373	1.29504	0.000406	0.004765	0.473	1.38799	0.000955	0.018862	0.31	1.23971	0.007419	0.102533
ARL3	NM_004311.2	7150671	ILMN_1780444	10	0.347	1.27191	0.006167	0.143577	0.532	1.44593	4.2e-05	0.000815	-0.009	0.993781	0.921076	0.984485	0.185	1.13682	0.015692	0.167237
ARL4A	NM_001037164.1	7560615	ILMN_1743241	7	0.932	1.90792	3e-06	0.002289	0.442	1.35849	0.001561	0.014331	-0.354	0.782412	0.000132	0.004675	-0.49	0.712025	0.003989	0.068122
ARL4A	NM_001037164.1	1010161	ILMN_1704842	7	0.256	1.19416	0.00458	0.121255	-0.042	0.971307	0.535914	0.834833	-0.173	0.886996	0.020987	0.171205	-0.298	0.813379	0.007021	0.098545
ARL4A	NM_001037164.1	6290369	ILMN_1753663	7	0.267	1.2033	0.013258	0.216807	0.101	1.07252	0.200772	0.547663	-0.082	0.944747	0.121156	0.500616	-0.166	0.89131	0.157587	0.601717
ARL4A	NM_001037164.1	1260364	ILMN_2369953	7	0.241	1.18181	0.001173	0.057203	0.106	1.07624	0.097917	0.361668	-0.078	0.94737	0.270043	0.702731	-0.135	0.91067	0.034049	0.272136
ARL4A	NM_005738.3	1410113	ILMN_1775405	7	1.918	3.77899	1.6e-05	0.005347	1.5	2.82843	2e-06	0.000106	0.315	1.24401	0.097181	0.446135	-0.418	0.748461	0.003241	0.059225
ARL4C	NM_005737.3	1300192	ILMN_1768391	2	-0.143	0.905634	0.037016	0.361481	-0.164	0.892547	0.009497	0.061827	-0.134	0.911301	0.038708	0.259006	-0.021	0.985549	0.686485	0.93851
ARL4D	NM_001661.3	4780010	ILMN_1719010	17	-0.084	0.943438	0.33299	0.790832	0.028	1.0196	0.606275	0.869244	0.014	1.00975	0.767554	0.946721	0.112	1.08073	0.23605	0.697635
ARL5A	NM_001037174.1	2630209	ILMN_2332558	2	0.13	1.09429	0.204758	0.692374	0.003	1.00208	0.965826	0.991313	-0.181	0.882091	0.020651	0.169144	-0.127	0.915734	0.235252	0.696859
ARL5A	NM_012097.3	70364	ILMN_1771738	2	-0.054	0.963262	0.505285	0.880934	-0.106	0.929161	0.248799	0.609349	0.021	1.01466	0.810125	0.960221	-0.052	0.964598	0.4795	0.860644
ARL5A	NM_001037174.1	6270195	ILMN_1688526	2	-0.071	0.951978	0.50127	0.879932	-0.592	0.663423	1e-06	7.2e-05	-0.35	0.784584	0.000905	0.018159	-0.52	0.697372	0.00063	0.021154
ARL5B	NM_178815.3	2340564	ILMN_1680465	10	-0.23	0.852635	0.022856	0.288218	-0.184	0.880259	0.010468	0.066794	0.22	1.16473	0.003654	0.048976	0.046	1.0324	0.585838	0.907326
ARL5B	NM_178815.3	1710753	ILMN_2120022	10	-0.04	0.972655	0.616263	0.91893	-0.084	0.943438	0.241694	0.600497	0.226	1.16959	0.00773	0.08523	-0.043	0.970634	0.617441	0.918388
ARL5C	XM_936698.1	1260743	ILMN_1679295		-0.067	0.954621	0.192472	0.679969	-0.025	0.982821	0.645045	0.886704	-0.041	0.971981	0.488246	0.849313	0.042	1.02954	0.443476	0.845923
ARL6	NM_177976.1	5270646	ILMN_1771822	3	-0.14	0.907519	0.073757	0.487878	-0.092	0.938221	0.177424	0.512521	0.003	1.00208	0.969415	0.993964	0.048	1.03383	0.404637	0.824875
ARL6	NM_177976.1	6520471	ILMN_1750488	3	0.009	1.00626	0.859082	0.974504	0.004	1.00278	0.939642	0.984906	0.039	1.0274	0.480093	0.845485	-0.005	0.99654	0.922647	0.988022
ARL6	NM_032146.3	1090482	ILMN_2307266	3	-0.045	0.96929	0.325549	0.786382	0.034	1.02385	0.487228	0.806386	0.078	1.05555	0.122011	0.50239	0.079	1.05629	0.139426	0.570486
ARL6	NM_032146.3	2850154	ILMN_1703325	3	0.064	1.04536	0.325059	0.786382	0.078	1.05555	0.278633	0.640567	0.088	1.0629	0.293324	0.723948	0.013	1.00905	0.806391	0.96586
ARL6IP1	NM_015161.1	2690047	ILMN_1708416	16	-0.577	0.670356	0.002203	0.081241	-0.926	0.526316	0	1.6e-05	-0.612	0.654289	0.000116	0.004323	-0.349	0.785128	0.016493	0.172494
ARL6IP1	NM_015161.1	5960324	ILMN_2113362	16	-0.336	0.792235	0.000107	0.015511	-0.465	0.724471	8e-05	0.001328	-0.185	0.879649	0.02036	0.167438	-0.129	0.914465	0.111514	0.514784
ARL6IP4	NM_001002251.1	4900053	ILMN_2393144	12	-0.192	0.875391	0.026339	0.308582	-0.374	0.77164	0.000137	0.002016	-0.185	0.879649	0.093314	0.436899	-0.182	0.88148	0.038403	0.291503
ARL6IP4	NM_018694.2	2350192	ILMN_1791149	12	-0.255	0.837987	0.096815	0.537698	-0.328	0.79664	0.001672	0.015122	-0.025	0.982821	0.845577	0.967607	-0.073	0.950659	0.624918	0.920712
ARL6IP4	NM_001002252.1	3120289	ILMN_1779835	12	0.018	1.01255	0.666777	0.931836	0.023	1.01607	0.638089	0.884083	0.051	1.03598	0.27331	0.705542	0.006	1.00417	0.913265	0.986169
ARL6IP5	NM_006407.3	2070563	ILMN_1769810	3	0.101	1.07252	0.333016	0.790832	0.429	1.3463	0.00016	0.002279	0.267	1.2033	0.001209	0.022386	0.327	1.2544	0.017306	0.177637
ARL6IP6	NM_152522.3	670382	ILMN_1797964	2	-0.329	0.796088	0.048559	0.410442	-0.806	0.571965	5.3e-05	0.000975	-0.204	0.86814	0.159646	0.567121	-0.476	0.718968	0.004044	0.068765
ARL6IP6	NM_152522.2	7050438	ILMN_2117902	2	-0.03	0.97942	0.538213	0.892131	0.015	1.01045	0.745779	0.926551	-0.033	0.977386	0.582722	0.889957	0.045	1.03168	0.358628	0.798635
ARL8A	NM_138795.2	1190768	ILMN_1659148	1	-0.078	0.94737	0.088266	0.521263	-0.036	0.975355	0.505907	0.817339	-0.049	0.966606	0.37402	0.785566	0.042	1.02954	0.426313	0.837333
ARL8B	NM_018184.2	130685	ILMN_1752837	3	-0.111	0.925946	0.071084	0.480959	-0.06	0.959264	0.379751	0.733156	0.205	1.15269	0.010059	0.102129	0.05	1.03526	0.534496	0.88652
ARL9	NM_206919.1	6350066	ILMN_1777691	4	-0.005	0.99654	0.922368	0.986467	0.001	1.00069	0.990076	0.99756	0.03	1.02101	0.676761	0.92136	0.006	1.00417	0.893868	0.982367
ARMC1	NM_018120.3	7570209	ILMN_1722066	8	-0.13	0.913831	0.212395	0.700884	-0.496	0.70907	0.001031	0.010236	-0.5	0.707107	0.000189	0.005981	-0.366	0.775931	0.00827	0.110085
ARMC10	NM_031905.2	6840593	ILMN_2052598	7	-0.255	0.837987	0.016226	0.241773	-0.259	0.835667	0.000263	0.003358	-0.032	0.978063	0.530467	0.869494	-0.004	0.997231	0.963869	0.994259
ARMC10	NM_031905.2	2900372	ILMN_1689296	7	0.014	1.00975	0.797233	0.960739	0.057	1.0403	0.380186	0.733488	-0.017	0.988286	0.769867	0.947387	0.042	1.02954	0.483633	0.863113
ARMC2	NM_032131.4	6130324	ILMN_1779256	6	0.069	1.04899	0.318849	0.783369	0.049	1.03455	0.410103	0.756843	0.034	1.02385	0.661834	0.916236	-0.02	0.986233	0.690627	0.939859
ARMC2	NM_032131.3	1710152	ILMN_2213008	6	0.045	1.03168	0.495506	0.878481	0.048	1.03383	0.398694	0.748562	0.083	1.05922	0.158122	0.564743	0.003	1.00208	0.963932	0.994259
ARMC3	NM_173081.3	1850242	ILMN_3243057	10	-0.002	0.998615	0.975458	0.995587	0.035	1.02456	0.471636	0.796599	-0.051	0.965267	0.286546	0.717808	0.037	1.02598	0.483199	0.862718
ARMC4	NM_018076.2	4200274	ILMN_1776395	10	0.52	1.43396	1.7e-05	0.005613	0.285	1.21841	0.00112	0.010953	0.042	1.02954	0.381118	0.789135	-0.234	0.850274	0.011373	0.136077
ARMC5	NM_024742.1	2060154	ILMN_1697088	16	-0.051	0.965267	0.704208	0.941075	0.363	1.2861	0.001628	0.014805	0.214	1.1599	0.012521	0.119568	0.413	1.33145	0.014198	0.157044
ARMC6	NM_033415.2	2060128	ILMN_1697118	19	0.1	1.07177	0.18479	0.671969	0.307	1.23713	0.000304	0.003788	0.11	1.07923	0.150833	0.552656	0.206	1.15349	0.013284	0.15092
ARMC7	NM_024585.2	730020	ILMN_1797298	17	-0.277	0.825305	0.00322	0.100071	-0.19	0.876606	0.021103	0.117215	-0.366	0.775931	0.000232	0.006885	0.086	1.06142	0.227514	0.687093
ARMC8	NM_014154.2	6550750	ILMN_2385318	3	-0.059	0.959929	0.18917	0.676842	-0.117	0.922103	0.045847	0.213581	-0.131	0.913198	0.027602	0.2075	-0.058	0.960595	0.267972	0.729466
ARMC8	NM_015396.3	2510575	ILMN_1781151	3	-0.09	0.939523	0.046078	0.399557	-0.19	0.876606	0.003509	0.027402	-0.089	0.940174	0.07067	0.374301	-0.1	0.933033	0.071268	0.413809
ARMC8	NM_213654.1	6110369	ILMN_1656557	3	-0.012	0.991717	0.800308	0.961497	-0.007	0.99516	0.880733	0.968745	0.031	1.02172	0.550962	0.877848	0.005	1.00347	0.914678	0.986283
ARMC8	NM_015396.3	940736	ILMN_1797453	3	0.089	1.06363	0.118149	0.578817	0.081	1.05775	0.300419	0.663224	0.063	1.04464	0.295494	0.725562	-0.008	0.99447	0.91035	0.985754
ARMC9	NM_025139.2	4880619	ILMN_1755732	2	0.021	1.01466	0.66683	0.931836	0.028	1.0196	0.569456	0.851961	0.118	1.08523	0.207616	0.631821	0.007	1.00486	0.857526	0.975298
ARMCX1	NM_016608.1	3170113	ILMN_2180677	X	0.005	1.00347	0.933213	0.989012	0.079	1.05629	0.128161	0.426494	-0.017	0.988286	0.730542	0.937488	0.075	1.05336	0.220911	0.681169
ARMCX1	NM_016608.1	4230451	ILMN_1788192	X	-0.03	0.97942	0.537839	0.891954	0.016	1.01115	0.731488	0.921935	-0.001	0.999307	0.981532	0.996116	0.046	1.0324	0.354686	0.795747
ARMCX2	NM_177949.1	3930201	ILMN_1785170	X	-0.064	0.956608	0.196926	0.685569	0.025	1.01748	0.578163	0.856186	0.04	1.02811	0.398753	0.800801	0.089	1.06363	0.08927	0.463353
ARMCX3	NM_177948.2	6180725	ILMN_1664675	X	-0.038	0.974004	0.515212	0.884515	0.012	1.00835	0.81972	0.950665	-0.015	0.989657	0.812076	0.960646	0.05	1.03526	0.299169	0.756041
ARMCX3	NM_177948.2	3780753	ILMN_1651741	X	-0.033	0.977386	0.59332	0.911668	-0.057	0.961261	0.27985	0.641847	0.016	1.01115	0.751359	0.943849	-0.024	0.983502	0.731372	0.949744
ARMCX3	NM_177947.2	7150427	ILMN_2334765	X	0.139	1.10114	0.059889	0.4478	0.426	1.3435	8e-06	0.000234	0.125	1.09051	0.304829	0.734154	0.287	1.2201	0.001418	0.034724
ARMCX3	NM_177947.2	2320647	ILMN_2334760	X	0.118	1.08523	0.070523	0.479213	0.495	1.40932	0.000327	0.004014	0.311	1.24057	0.001037	0.020049	0.377	1.29864	0.00358	0.063458
ARMCX4	NM_152583.1	1470474	ILMN_1743345	X	0.035	1.02456	0.575196	0.90625	0.079	1.05629	0.227194	0.582916	0.025	1.01748	0.694256	0.92848	0.044	1.03097	0.431184	0.839359
ARMCX5	NM_022838.2	1580619	ILMN_1741156	X	0.039	1.0274	0.674084	0.934471	-0.043	0.970634	0.498818	0.813139	-0.094	0.936921	0.131427	0.519471	-0.082	0.944747	0.387539	0.815331
ARMCX6	NM_019007.3	4490215	ILMN_1716026	X	0.365	1.28788	0.006444	0.147633	0.49	1.40444	0.001379	0.012946	-0.033	0.977386	0.685557	0.924609	0.125	1.09051	0.296557	0.75391
ARMCX6	NM_019007.3	4150020	ILMN_1768226	X	-0.012	0.991717	0.866859	0.976181	0.129	1.09354	0.105384	0.378714	-0.012	0.991717	0.862849	0.971405	0.141	1.10267	0.063255	0.387853
ARMCX6	NM_019007.3	1690475	ILMN_2414533	X	0.354	1.2781	0.001127	0.056138	0.415	1.3333	7.7e-05	0.00129	0.142	1.10343	0.160571	0.568485	0.06	1.04247	0.347618	0.791399
ARMET	NM_006010.2	4560110	ILMN_2183510	3	0.075	1.05336	0.532144	0.890305	0.305	1.23542	0.012667	0.077688	-0.121	0.91955	0.189212	0.610277	0.23	1.17283	0.113015	0.517774
ARMS2	NM_001099667.1	4200324	ILMN_3249571	10	-0.047	0.967947	0.321209	0.784161	-0.036	0.975355	0.46615	0.793541	0.003	1.00208	0.958271	0.991988	0.011	1.00765	0.809396	0.966266
ARNT	NM_001668.2	2640338	ILMN_1762582	1	-0.02	0.986233	0.730072	0.946873	-0.007	0.99516	0.904745	0.975458	-0.001	0.999307	0.989778	0.998184	0.013	1.00905	0.86713	0.977265
ARNT	NM_178426.1	2190040	ILMN_2347314	1	-0.005	0.99654	0.938437	0.989937	-0.075	0.949342	0.215452	0.567579	0.024	1.01677	0.759052	0.945247	-0.07	0.952638	0.267587	0.729259
ARNT2	NM_014862.3	4180307	ILMN_1718046	15	0.215	1.1607	0.015711	0.237383	0.04	1.02811	0.409329	0.756196	0.037	1.02598	0.498705	0.85361	-0.175	0.885768	0.032863	0.266216
ARNTL	NM_001030273.1	20064	ILMN_1731476	11	-0.033	0.977386	0.598533	0.913283	0.041	1.02883	0.434645	0.77226	-0.041	0.971981	0.384645	0.791605	0.073	1.0519	0.28077	0.740668
ARNTL	NM_001030272.1	7150519	ILMN_2405305	11	-0.048	0.967276	0.634458	0.924252	0.082	1.05848	0.375019	0.729239	0.112	1.08073	0.222977	0.652395	0.131	1.09505	0.124514	0.541654
ARNTL2	NM_020183.3	770523	ILMN_1798064	12	0.054	1.03814	0.222487	0.710025	0.013	1.00905	0.76917	0.93532	-0.01	0.993092	0.839355	0.96615	-0.041	0.971981	0.340524	0.786809
ARP11	XR_041999.1	3830672	ILMN_3185198	7	-0.016	0.988971	0.768328	0.95392	0.068	1.04826	0.257985	0.619561	-0.016	0.988971	0.757072	0.944919	0.085	1.06069	0.161859	0.608752
ARPC1A	NM_006409.2	7610692	ILMN_1759915	7	-0.461	0.726483	0.001391	0.062842	-0.663	0.631564	1.7e-05	0.000428	-0.204	0.86814	0.12793	0.512804	-0.202	0.869345	0.000883	0.025899
ARPC1B	NM_005720.2	130717	ILMN_2085760	7	-0.147	0.903127	0.127341	0.592706	-0.553	0.681601	1e-05	0.00029	-0.303	0.810565	0.011257	0.110442	-0.407	0.75419	0.002895	0.055097
ARPC2	NM_005731.2	7560162	ILMN_1810200	2	-0.095	0.936272	0.063031	0.456144	-0.089	0.940174	0.077388	0.308717	-0.059	0.959929	0.301453	0.731275	0.006	1.00417	0.886722	0.981194
ARPC2	NM_152862.1	5340546	ILMN_2255021	2	-0.152	0.900002	0.073224	0.486943	0.047	1.03311	0.348615	0.707519	0.04	1.02811	0.616836	0.902745	0.199	1.1479	0.021911	0.206678
ARPC2	NM_005731.2	7160327	ILMN_1792489	2	-0.151	0.900626	0.125475	0.589765	-0.057	0.961261	0.386835	0.73935	0.283	1.21672	0.00227	0.034805	0.094	1.06733	0.327317	0.777802
ARPC3	NM_005719.2	7380193	ILMN_1655561	12	0.332	1.25876	0.042016	0.383872	0.454	1.36983	0.000135	0.001992	0.184	1.13603	0.046996	0.292735	0.122	1.08824	0.404276	0.824441
ARPC4	NM_005718.3	2230068	ILMN_1803183	3	-0.03	0.97942	0.628696	0.922292	-0.004	0.997231	0.943503	0.985347	0.026	1.01819	0.676919	0.921386	0.026	1.01819	0.589847	0.90879
ARPC4	NM_001024959.1	2690601	ILMN_1707336	3	0.114	1.08222	0.383506	0.823106	0.207	1.15429	0.067812	0.28234	0.064	1.04536	0.674643	0.920487	0.093	1.06659	0.505972	0.874769
ARPC4	NM_001024960.1	2600619	ILMN_2393763	3	-0.049	0.966606	0.542224	0.89371	0.134	1.09733	0.088796	0.338836	0.111	1.07998	0.275944	0.70813	0.183	1.13524	0.014518	0.1588
ARPC5	NM_005717.2	20142	ILMN_1768394	1	-0.435	0.739694	0.004449	0.11945	-0.397	0.759436	0.000488	0.005539	0.109	1.07848	0.27727	0.709088	0.037	1.02598	0.739402	0.952322
ARPC5L	NM_030978.1	4830056	ILMN_2043816	9	-0.063	0.957271	0.594341	0.911876	-0.045	0.96929	0.55954	0.847469	0.087	1.06216	0.283623	0.715001	0.018	1.01255	0.853622	0.97467
ARPM1	NM_032487.3	2480615	ILMN_1782810	3	0.004	1.00278	0.964376	0.993479	-0.073	0.950659	0.151839	0.47137	-0.149	0.901875	0.023819	0.187184	-0.077	0.948027	0.394555	0.81869
ARPM2	NM_080431.3	2600754	ILMN_1776442	1	0.07	1.04972	0.276794	0.754296	-0.012	0.991717	0.817586	0.949905	-0.091	0.938872	0.087525	0.421441	-0.082	0.944747	0.208694	0.667583
ARPP19	NM_006628.4	6620356	ILMN_2059505	15	-0.107	0.928517	0.043945	0.392488	0.136	1.09885	0.08836	0.337708	-0.003	0.997923	0.969676	0.993964	0.243	1.18345	0.013577	0.152997
ARPP19	NM_006628.4	2140368	ILMN_1772798	15	-0.163	0.893166	0.055067	0.435128	-0.036	0.975355	0.496877	0.812043	0.165	1.12117	0.054744	0.32208	0.127	1.09202	0.130737	0.554047
ARPP-21	NM_016300.4	1690561	ILMN_2289825	3	-0.091	0.938872	0.074268	0.48898	-0.056	0.961927	0.218501	0.572172	-0.078	0.94737	0.102637	0.460068	0.035	1.02456	0.461965	0.853423
ARPP-21	NM_016300.4	4560301	ILMN_1672161	3	-0.005	0.99654	0.90655	0.983162	-0.024	0.983502	0.610389	0.870917	-0.055	0.962594	0.339932	0.76129	-0.019	0.986917	0.666731	0.932522
ARPP-21	NM_001025068.1	7160437	ILMN_2374728	3	0.023	1.01607	0.590043	0.911185	-0.022	0.984866	0.636075	0.883544	0.006	1.00417	0.898195	0.979606	-0.045	0.96929	0.331522	0.780902
ARPP-21	NM_198399.1	6370551	ILMN_2251505	3	-0.025	0.982821	0.663924	0.930994	0.026	1.01819	0.590769	0.862606	0.009	1.00626	0.856854	0.970017	0.051	1.03598	0.343998	0.788997
ARPP-21	NM_016300.4	7210554	ILMN_1671402	3	0.014	1.00975	0.80376	0.962693	-0.019	0.986917	0.700827	0.910211	0.061	1.04319	0.238837	0.669481	-0.032	0.978063	0.5204	0.880919
ARR3	NM_004312.1	3850307	ILMN_1660126	X	-0.008	0.99447	0.863412	0.975748	-0.09	0.939523	0.071809	0.29389	-0.045	0.96929	0.395312	0.798728	-0.082	0.944747	0.096385	0.481893
ARRB1	NM_020251.2	2490288	ILMN_2325168	11	-0.052	0.964598	0.542592	0.893993	0.098	1.07029	0.165488	0.493844	0.052	1.0367	0.444013	0.826499	0.15	1.10957	0.072612	0.417494
ARRB1	NM_004041.3	5670673	ILMN_1730620	11	-0.019	0.986917	0.726595	0.946512	0.15	1.10957	0.048462	0.222651	0.145	1.10573	0.021675	0.174863	0.169	1.12428	0.060859	0.378932
ARRB2	NM_199004.1	4260347	ILMN_2395711	17	0.055	1.03886	0.543493	0.894284	-0.043	0.970634	0.48526	0.805244	-0.036	0.975355	0.54136	0.873418	-0.098	0.934327	0.316416	0.768957
ARRB2	NM_199004.1	3930133	ILMN_1675866	17	0.032	1.02243	0.471528	0.867625	-0.021	0.985549	0.677937	0.900616	-0.032	0.978063	0.495969	0.852684	-0.053	0.96393	0.305714	0.760674
ARRDC1	NM_152285.2	4850646	ILMN_1661492	9	-0.203	0.868742	0.041316	0.380962	-0.143	0.905634	0.02986	0.154098	0.121	1.08749	0.07927	0.399756	0.06	1.04247	0.459137	0.852464
ARRDC2	NM_015683.1	7000609	ILMN_1655612	19	0.1	1.07177	0.181036	0.667801	0.321	1.2492	0.000965	0.009716	-0.067	0.954621	0.406567	0.805621	0.221	1.16554	0.008631	0.113308
ARRDC2	NM_001025604.1	4730110	ILMN_1710229	19	-0.074	0.95	0.234114	0.72058	-0.041	0.971981	0.445573	0.780403	-0.019	0.986917	0.752118	0.943928	0.033	1.02314	0.625859	0.920861
ARRDC2	NM_015683.1	3870504	ILMN_1715181	19	0.17	1.12506	0.112008	0.568402	0.522	1.43594	2e-06	8.9e-05	0.339	1.26488	0.000136	0.004758	0.352	1.27633	0.004564	0.074685
ARRDC3	NM_020801.1	6450161	ILMN_2198516	5	0.04	1.02811	0.534858	0.891026	-0.002	0.998615	0.959684	0.989922	-0.068	0.95396	0.189956	0.611155	-0.043	0.970634	0.494777	0.869273
ARRDC3	NM_020801.1	4060672	ILMN_2198515	5	-0.001	0.999307	0.980011	0.996302	-0.019	0.986917	0.734637	0.923479	0	1	0.996106	0.999345	-0.017	0.988286	0.803155	0.965091
ARRDC4	NM_183376.1	3450463	ILMN_2184064	15	0.023	1.01607	0.74283	0.94912	-0.004	0.997231	0.942122	0.985062	-0.066	0.955283	0.225897	0.655214	-0.027	0.981459	0.714962	0.945238
ARRDC4	NM_183376.1	6580168	ILMN_1660544	15	-0.056	0.961927	0.312649	0.77949	0.043	1.03025	0.342422	0.702119	0.032	1.02243	0.485283	0.848084	0.099	1.07103	0.092261	0.471869
ARRDC5	NM_001080523.1	2370270	ILMN_2153787	19	-0.078	0.94737	0.266685	0.746493	-0.049	0.966606	0.417143	0.761644	-0.025	0.982821	0.695844	0.92942	0.029	1.0203	0.547489	0.891987
ARS2	NM_015908.4	3420121	ILMN_2358202	7	0.346	1.27103	0.114821	0.572386	0.364	1.28699	0.00079	0.008255	0.159	1.11651	0.042981	0.276367	0.017	1.01185	0.92831	0.988772
ARS2	NM_182800.2	7330646	ILMN_1733295	7	0.03	1.02101	0.629828	0.922531	0.04	1.02811	0.47729	0.800048	0.181	1.13367	0.01031	0.103915	0.01	1.00696	0.844518	0.973507
ARSA	NM_000487.3	4150168	ILMN_2047240	22	0.031	1.02172	0.769746	0.953947	-0.094	0.936921	0.280335	0.642246	-0.075	0.949342	0.425191	0.814732	-0.125	0.917004	0.311668	0.764751
ARSA	NM_001085425.1	4920546	ILMN_1656477	22	-0.024	0.983502	0.579726	0.908015	-0.045	0.96929	0.41683	0.761425	0.04	1.02811	0.409994	0.806983	-0.02	0.986233	0.71211	0.944811
ARSB	NM_000046.2	270215	ILMN_2242937	5	-0.005	0.99654	0.948966	0.991219	-0.078	0.94737	0.188586	0.528907	-0.188	0.877822	0.023726	0.18675	-0.073	0.950659	0.349955	0.792901
ARSB	NM_000046.2	7040600	ILMN_1712587	5	-0.015	0.989657	0.820682	0.967125	-0.097	0.934975	0.077592	0.309249	-0.049	0.966606	0.578029	0.887684	-0.082	0.944747	0.203891	0.662825
ARSB	NM_198709.1	150546	ILMN_1668727	5	0.019	1.01326	0.739952	0.948673	-0.017	0.988286	0.752303	0.929191	0.004	1.00278	0.942209	0.98876	-0.036	0.975355	0.53565	0.886886
ARSB	NM_000046.2	6900309	ILMN_1722045	5	0.004	1.00278	0.93528	0.989562	0.035	1.02456	0.535764	0.83475	0.105	1.07549	0.120611	0.499508	0.031	1.02172	0.53987	0.88919
ARSD	NM_001669.2	6580689	ILMN_1684873	X	-0.013	0.99103	0.830263	0.969232	-0.13	0.913831	0.069581	0.287464	-0.16	0.895025	0.033885	0.238085	-0.118	0.921464	0.089071	0.462949
ARSD	NM_001669.2	4230609	ILMN_1684956	X	0.038	1.02669	0.473	0.868242	-0.008	0.99447	0.875515	0.967233	-0.026	0.98214	0.654147	0.913924	-0.046	0.968618	0.310398	0.763866
ARSD	NM_009589.2	4540672	ILMN_1661624	X	0.081	1.05775	0.092028	0.528291	0.092	1.06585	0.062466	0.267048	0.015	1.01045	0.761187	0.945448	0.011	1.00765	0.800406	0.964767
ARSE	NM_000047.1	3940630	ILMN_1727462	X	-0.011	0.992404	0.81352	0.964972	-0.002	0.998615	0.96445	0.991023	0.051	1.03598	0.306554	0.735481	0.009	1.00626	0.874403	0.978566
ARSF	NM_004042.3	4390403	ILMN_1664001	X	0.031	1.02172	0.481704	0.871951	0.002	1.00139	0.966926	0.991313	0.008	1.00556	0.902966	0.980498	-0.029	0.980099	0.553211	0.893914
ARSG	NM_014960.2	3190753	ILMN_1720604	17	-0.04	0.972655	0.440501	0.853998	-0.2	0.870551	0.003679	0.028478	-0.064	0.956608	0.312987	0.740623	-0.161	0.894405	0.006128	0.089938
ARSH	NM_001011719.1	50292	ILMN_1757896	X	0.018	1.01255	0.766405	0.953613	-0.024	0.983502	0.613989	0.872716	-0.056	0.961927	0.387762	0.79334	-0.042	0.971307	0.511695	0.877003
ARSI	NM_001012301.1	4230161	ILMN_1727156	5	-0.071	0.951978	0.221782	0.709307	0.047	1.03311	0.379491	0.732864	-0.016	0.988971	0.783877	0.952138	0.117	1.08448	0.026209	0.229628
ARSJ	NM_024590.3	2640725	ILMN_1679318	4	-0.038	0.974004	0.463393	0.864368	-0.035	0.976032	0.487261	0.806386	-0.005	0.99654	0.921056	0.984485	0.002	1.00139	0.966041	0.994311
ARSK	NM_198150.1	7560255	ILMN_1657050	5	-0.107	0.928517	0.073821	0.487904	0.295	1.22688	0.000809	0.008407	0.154	1.11265	0.02924	0.2159	0.402	1.32134	0.000426	0.016461
ART1	NM_004314.1	3710114	ILMN_1807913	11	0.063	1.04464	0.409296	0.835912	-0.009	0.993781	0.886107	0.970153	-0.102	0.93174	0.131002	0.518483	-0.072	0.951318	0.24924	0.712657
ART3	NM_001179.3	7040497	ILMN_1693218	4	-0.024	0.983502	0.580402	0.908286	-0.025	0.982821	0.565008	0.850382	-0.025	0.982821	0.645787	0.911505	-0.001	0.999307	0.98522	0.998155
ART4	NM_021071.2	1400577	ILMN_1805773	12	0.024	1.01677	0.678096	0.935214	-0.037	0.97468	0.574144	0.854111	0.101	1.07252	0.0839	0.41255	-0.061	0.958599	0.429879	0.838791
ART5	NM_053017.3	3130239	ILMN_2338733	11	0.108	1.07773	0.088981	0.522738	0.215	1.1607	0.012276	0.075807	-0.027	0.981459	0.614696	0.901881	0.107	1.07699	0.173808	0.624812
ART5	NM_053017.2	50437	ILMN_1733583	11	0.015	1.01045	0.703066	0.940891	0.024	1.01677	0.588657	0.86132	0.001	1.00069	0.973647	0.994819	0.009	1.00626	0.827002	0.970162
ARTN	NM_057160.1	6270446	ILMN_1773295	1	0.015	1.01045	0.756776	0.952136	0.083	1.05922	0.081167	0.31887	-0.006	0.99585	0.904216	0.980643	0.068	1.04826	0.179307	0.631712
ARTN	NM_003976.2	4760468	ILMN_1727040	1	-0.037	0.97468	0.513141	0.884027	-0.006	0.99585	0.90794	0.976481	-0.003	0.997923	0.955221	0.991544	0.03	1.02101	0.486237	0.865029
ARTN	NM_057091.1	1850246	ILMN_1762952	1	0.01	1.00696	0.843117	0.971435	0.006	1.00417	0.8898	0.970759	0.1	1.07177	0.059412	0.337049	-0.004	0.997231	0.945816	0.990745
ARTN	NM_057091.1	6560494	ILMN_1803691	1	-0.196	0.872968	0.041691	0.382545	-0.018	0.987601	0.810314	0.948588	0.171	1.12584	0.04245	0.274312	0.178	1.13131	0.077358	0.431399
ARV1	NM_022786.1	1500246	ILMN_1800935	1	0.14	1.10191	0.022049	0.28306	0.063	1.04464	0.208755	0.558611	-0.089	0.940174	0.162976	0.572686	-0.077	0.948027	0.12756	0.548253
ARVCF	NM_001670.1	5810301	ILMN_1677226	22	-0.021	0.985549	0.628717	0.922292	0.011	1.00765	0.831819	0.955307	-0.024	0.983502	0.674871	0.920637	0.032	1.02243	0.520491	0.880919
ARVP6125	XR_041956.1	5890544	ILMN_3307108	3	-0.051	0.965267	0.52069	0.886593	-0.094	0.936921	0.203347	0.550872	-0.112	0.925304	0.153831	0.557242	-0.044	0.969962	0.422002	0.835127
ARVP6125	NM_001030078.1	7150255	ILMN_1720205	3	0.053	1.03742	0.27921	0.755893	-0.019	0.986917	0.682309	0.902319	-0.044	0.969962	0.490842	0.851108	-0.072	0.951318	0.143513	0.577922
ARX	NM_139058.1	4070020	ILMN_1724162	X	-0.034	0.976709	0.469315	0.866662	-0.054	0.963262	0.272876	0.634058	0.064	1.04536	0.193744	0.615061	-0.02	0.986233	0.667638	0.932563
AS3MT	NM_020682.3	4280390	ILMN_1771732	10	-0.002	0.998615	0.960278	0.99311	-0.033	0.977386	0.533357	0.833825	-0.012	0.991717	0.816493	0.96141	-0.03	0.97942	0.543727	0.890278
ASAH1	NM_177924.2	2030482	ILMN_1684054	8	0.253	1.19168	0.022494	0.285978	0.03	1.02101	0.67879	0.90095	-0.082	0.944747	0.322649	0.747314	-0.224	0.856188	0.007802	0.105691
ASAH1	NM_004315.3	5420332	ILMN_1655509	8	-0.058	0.960595	0.227459	0.714613	-0.025	0.982821	0.641688	0.885278	-0.005	0.99654	0.920922	0.984476	0.032	1.02243	0.57849	0.904876
ASAH2	NM_019893.1	1190112	ILMN_1780786	10	-0.09	0.939523	0.137553	0.609061	-0.074	0.95	0.188652	0.529032	-0.001	0.999307	0.992001	0.998753	0.016	1.01115	0.740934	0.952384
ASAH2	XM_001125770.1	4210132	ILMN_1800237		0.054	1.03814	0.326021	0.786647	0.004	1.00278	0.94061	0.985062	0.006	1.00417	0.906068	0.981001	-0.05	0.965936	0.394619	0.81869
ASAH2	NM_019893.1	4830544	ILMN_1776129	10	0.058	1.04102	0.221108	0.708976	-0.007	0.99516	0.890621	0.970899	0.025	1.01748	0.596971	0.895124	-0.064	0.956608	0.172649	0.623085
ASAH2B	NM_001079516.1	4810537	ILMN_1658602	10	-0.055	0.962594	0.431075	0.848692	-0.063	0.957271	0.273334	0.634457	0.034	1.02385	0.499211	0.853944	-0.009	0.993781	0.906647	0.984995
ASAH2B	NM_001079516.1	2370731	ILMN_2118773	10	0.044	1.03097	0.302441	0.772606	0.111	1.07998	0.069057	0.285848	0.076	1.05409	0.18404	0.60352	0.067	1.04754	0.254708	0.717203
ASAH2C	XM_927086.2	5080368	ILMN_3242048	10	-0.041	0.971981	0.337357	0.793596	0.023	1.01607	0.707959	0.913057	0.048	1.03383	0.400095	0.801533	0.063	1.04464	0.310366	0.763866
ASAM	NM_024769.2	5570682	ILMN_1656248	11	-0.112	0.925304	0.040765	0.378136	-0.098	0.934327	0.084277	0.326881	-0.026	0.98214	0.636256	0.90824	0.014	1.00975	0.772265	0.957712
ASAP1	NM_018482.2	7000072	ILMN_1690963	8	-0.167	0.890693	0.185214	0.672356	-0.146	0.903753	0.169524	0.500052	-0.063	0.957271	0.582649	0.889957	0.022	1.01537	0.687657	0.938867
ASAP1	NM_018482.2	940164	ILMN_2233366	8	-0.059	0.959929	0.607077	0.916621	-0.117	0.922103	0.187875	0.528019	-0.05	0.965936	0.463641	0.837037	-0.058	0.960595	0.619689	0.9191
ASAP1	NM_018482.2	6840129	ILMN_3245057	8	0.199	1.1479	0.212273	0.70083	-0.02	0.986233	0.870756	0.965758	0.117	1.08448	0.361522	0.776839	-0.219	0.859161	0.053889	0.355082
ASAP1IT1	NR_002765.2	1070209	ILMN_3244390	8	-0.049	0.966606	0.427868	0.846914	0.011	1.00765	0.822083	0.951384	-0.031	0.978742	0.512136	0.859952	0.06	1.04247	0.342803	0.78832
ASAP2	NM_003887.2	5340646	ILMN_3194508	2	-0.461	0.726483	0.011177	0.197912	-0.882	0.542615	2e-06	0.000104	-0.524	0.695441	0.000356	0.009279	-0.421	0.746907	0.007716	0.104958
ASAP2	NM_003887.2	2750674	ILMN_3270972	2	-0.194	0.874179	0.026709	0.310611	-0.439	0.737646	4e-06	0.000156	-0.282	0.82245	0.000298	0.008213	-0.244	0.844401	0.006417	0.092412
ASAP3	NM_017707.2	2190709	ILMN_1685441	1	0.255	1.19334	0.11729	0.576792	-0.2	0.870551	0.002843	0.023332	-0.161	0.894405	0.004982	0.061896	-0.456	0.729005	0.014811	0.160589
ASB1	NM_016114.3	1820347	ILMN_1683096	2	0.106	1.07624	0.410109	0.835975	0.097	1.06955	0.278323	0.640222	0.043	1.03025	0.683732	0.924092	-0.009	0.993781	0.926608	0.988592
ASB10	NM_080871.2	3190291	ILMN_1781148	7	0.077	1.05482	0.111345	0.567331	0.082	1.05848	0.153002	0.472997	0.091	1.06511	0.122752	0.504108	0.005	1.00347	0.924518	0.988259
ASB11	NM_001012428.1	1450474	ILMN_1722024	X	0.027	1.01889	0.647864	0.927919	-0.003	0.997923	0.947335	0.986656	-0.05	0.965936	0.341845	0.762722	-0.03	0.97942	0.582458	0.906216
ASB11	NM_080873.1	6510369	ILMN_2272251	X	-0.06	0.959264	0.334482	0.791585	0.023	1.01607	0.652642	0.890331	0.002	1.00139	0.964426	0.99319	0.083	1.05922	0.242374	0.704616
ASB11	NM_001012428.1	4640152	ILMN_1651643	X	0.037	1.02598	0.504369	0.880872	0.033	1.02314	0.511454	0.8212	0.073	1.0519	0.16941	0.583258	-0.003	0.997923	0.954941	0.992865
ASB12	NM_130388.2	7160519	ILMN_1656364	X	-0.011	0.992404	0.791661	0.958809	0.01	1.00696	0.817345	0.949905	-0.03	0.97942	0.504559	0.855685	0.021	1.01466	0.628213	0.92159
ASB13	NM_024701.2	5050575	ILMN_1654385	10	0.113	1.08147	0.057117	0.440081	-0.071	0.951978	0.21183	0.562864	-0.241	0.846159	0.015014	0.135908	-0.185	0.879649	0.006157	0.090121
ASB14	NM_130387.4	2850047	ILMN_1753737	3	0.027	1.01889	0.548581	0.896179	0.118	1.08523	0.031364	0.1602	0.144	1.10496	0.013845	0.128505	0.092	1.06585	0.091047	0.469048
ASB15	NM_080928.2	2030747	ILMN_1740528	7	0.002	1.00139	0.965682	0.99385	-0.003	0.997923	0.957947	0.989704	-0.02	0.986233	0.684811	0.924469	-0.004	0.997231	0.91985	0.987469
ASB16	NM_080863.4	2320152	ILMN_1810881	17	-0.066	0.955283	0.174746	0.6589	0.026	1.01819	0.581889	0.857704	-0.007	0.99516	0.903956	0.980585	0.091	1.06511	0.08693	0.458253
ASB17	NM_080868.1	270189	ILMN_2210101	1	-0.072	0.951318	0.119871	0.581045	-0.036	0.975355	0.490705	0.808199	-0.056	0.961927	0.253723	0.68587	0.035	1.02456	0.517365	0.879577
ASB17	NM_080868.1	1580523	ILMN_1670829	1	-0.015	0.989657	0.727438	0.94686	-0.039	0.973329	0.423329	0.765004	-0.045	0.96929	0.355753	0.77291	-0.025	0.982821	0.60971	0.91513
ASB18	NM_212556.2	1190048	ILMN_3248023	2	-0.03	0.97942	0.542948	0.894071	-0.033	0.977386	0.538179	0.836249	-0.025	0.982821	0.63979	0.909274	-0.004	0.997231	0.949707	0.991585
ASB2	NM_016150.3	3440674	ILMN_1795811	14	-0.052	0.964598	0.359921	0.808036	0.025	1.01748	0.638341	0.884187	-0.049	0.966606	0.316109	0.742464	0.078	1.05555	0.213391	0.672649
ASB3	NM_145863.1	2690068	ILMN_2358783	2	-0.185	0.879649	0.04387	0.392398	-0.086	0.942131	0.092095	0.346714	0.129	1.09354	0.025319	0.195472	0.099	1.07103	0.234516	0.695961
ASB3	NM_145863.1	60309	ILMN_2358784	2	-0.076	0.948684	0.187416	0.674916	0.057	1.0403	0.293189	0.655213	0.154	1.11265	0.044868	0.284336	0.132	1.09581	0.020576	0.198637
ASB3	NM_016115.3	5720458	ILMN_1699606	2	0.098	1.07029	0.179543	0.665869	0.178	1.13131	0.016438	0.095816	0.24	1.18099	0.004221	0.054706	0.08	1.05702	0.264163	0.725796
ASB4	NM_016116.1	2320014	ILMN_1702618	7	-0.049	0.966606	0.39856	0.829888	-0.025	0.982821	0.676758	0.899909	-0.053	0.96393	0.380029	0.788727	0.024	1.01677	0.695471	0.940683
ASB4	NM_145872.1	1170382	ILMN_1813668	7	-0.065	0.955945	0.246748	0.730836	0.002	1.00139	0.965021	0.991165	-0.007	0.99516	0.890534	0.977634	0.068	1.04826	0.1721	0.622502
ASB4	NM_016116.1	1740605	ILMN_1676066	7	-0.045	0.96929	0.379899	0.821244	0.04	1.02811	0.402984	0.752165	0	1	0.995714	0.999157	0.085	1.06069	0.121039	0.533721
ASB5	NM_080874.2	1440445	ILMN_1711269	4	-0.088	0.940826	0.211745	0.700358	-0.021	0.985549	0.766625	0.933959	-0.093	0.937571	0.189759	0.611083	0.066	1.04681	0.275443	0.736777
ASB5	NM_080874.2	5270554	ILMN_2126055	4	-0.029	0.980099	0.542237	0.89371	-0.024	0.983502	0.648445	0.888323	0.013	1.00905	0.800996	0.957973	0.004	1.00278	0.922419	0.987997
ASB6	NM_177999.1	1780450	ILMN_1806705	9	-0.12	0.920188	0.036417	0.358099	-0.056	0.961927	0.344578	0.703551	-0.056	0.961927	0.303555	0.732783	0.064	1.04536	0.252286	0.715606
ASB6	NM_017873.2	870164	ILMN_1655532	9	-0.052	0.964598	0.357195	0.806326	-0.027	0.981459	0.617698	0.874598	-0.005	0.99654	0.935408	0.987686	0.026	1.01819	0.564226	0.898992
ASB6	NM_177999.1	7000333	ILMN_2397776	9	-0.187	0.87843	0.009871	0.185095	-0.083	0.944092	0.146627	0.462518	0.038	1.02669	0.526014	0.867533	0.104	1.07475	0.036024	0.280993
ASB7	NM_024708.2	2190528	ILMN_1680419	15	-0.035	0.976032	0.542354	0.893809	0.025	1.01748	0.674168	0.898814	0.016	1.01115	0.798544	0.957386	0.059	1.04174	0.364482	0.801619
ASB7	NM_198243.1	2190156	ILMN_1753040	15	-0.051	0.965267	0.362075	0.809148	0.125	1.09051	0.037651	0.184215	0.035	1.02456	0.587926	0.892002	0.176	1.12975	0.009668	0.121575
ASB7	NM_024708.2	1470528	ILMN_1744050	15	0.099	1.07103	0.104424	0.554951	0.062	1.04391	0.364513	0.721062	0.051	1.03598	0.341024	0.762158	-0.038	0.974004	0.594464	0.910627
ASB8	NM_024095.3	870451	ILMN_2173740	12	0.106	1.07624	0.292096	0.7649	0.342	1.26751	0.000759	0.007992	0.028	1.0196	0.557115	0.880483	0.236	1.17772	0.066031	0.398187
ASB8	NM_024095.3	2490441	ILMN_1783675	12	0.038	1.02669	0.515115	0.884491	0.274	1.20916	0.001593	0.014573	0.162	1.11884	0.005622	0.067456	0.236	1.17772	0.016359	0.171713
ASB9	NM_024087.1	130110	ILMN_2373728	X	-0.038	0.974004	0.451837	0.859917	-0.037	0.97468	0.422435	0.764427	-0.118	0.921464	0.05057	0.306438	0	1	0.994253	0.999072
ASB9	NM_024087.1	4480091	ILMN_1786041	X	0.079	1.05629	0.412307	0.837228	0.039	1.0274	0.633587	0.882425	-0.098	0.934327	0.226565	0.656015	-0.04	0.972655	0.58724	0.907724
ASCC1	NM_015947.2	830528	ILMN_1685097	10	0.1	1.07177	0.20387	0.6917	-0.157	0.896888	0.017832	0.102218	-0.256	0.837406	0.004909	0.061248	-0.257	0.836826	0.004287	0.071641
ASCC2	NM_032204.3	1570523	ILMN_1679919	22	0.454	1.36983	0.219352	0.70708	0.387	1.30767	0.003497	0.027364	0.112	1.08073	0.164672	0.575442	-0.067	0.954621	0.84811	0.973993
ASCC3	NM_006828.2	650722	ILMN_1745772	6	-0.033	0.977386	0.781723	0.956761	0.629	1.54649	0	3.6e-05	0.818	1.76296	1e-06	0.00014	0.662	1.58227	0.00056	0.019517
ASCC3	NM_006828.2	5490138	ILMN_1772177	6	0.059	1.04174	0.357072	0.806234	0.065	1.04608	0.350767	0.709068	0.102	1.07326	0.156652	0.56241	0.006	1.00417	0.930053	0.989125
ASCC3	NM_022091.3	4890376	ILMN_1797656	6	0.053	1.03742	0.434293	0.851134	0.236	1.17772	0.007956	0.053551	0.185	1.13682	0.035583	0.245663	0.183	1.13524	0.0356	0.279347
ASCC3	NM_006828.2	870040	ILMN_2294751	6	0.163	1.11961	0.037584	0.36412	0.36	1.28343	3.3e-05	0.000677	0.594	1.50943	5e-06	0.00058	0.197	1.14631	0.012262	0.14348
ASCL1	NM_004316.2	4830376	ILMN_1701653	12	-0.025	0.982821	0.639462	0.925665	0.028	1.0196	0.581358	0.857391	0.01	1.00696	0.83797	0.96577	0.053	1.03742	0.315229	0.768294
ASCL2	NM_005170.2	7200435	ILMN_1723412	11	-0.041	0.971981	0.347712	0.800465	-0.01	0.993092	0.883502	0.969253	-0.028	0.980779	0.647177	0.91216	0.031	1.02172	0.674376	0.934974
ASCL3	NM_020646.1	6770500	ILMN_1695353	11	0.025	1.01748	0.659448	0.92982	-0.014	0.990343	0.791068	0.942001	-0.039	0.973329	0.538359	0.872208	-0.038	0.974004	0.415687	0.830431
ASCL4	NM_203436.1	540437	ILMN_1813075	12	0.013	1.00905	0.830498	0.969232	0.028	1.0196	0.623104	0.876948	0.01	1.00696	0.867406	0.972416	0.015	1.01045	0.741149	0.952384
ASCL5	XM_001719321.1	3940181	ILMN_3261705	1	-0.014	0.990343	0.824464	0.967878	0.029	1.0203	0.637651	0.884063	-0.093	0.937571	0.148677	0.548779	0.042	1.02954	0.485773	0.864742
ASCL5	XM_001719321.1	770521	ILMN_3185242	1	-0.054	0.963262	0.25963	0.740042	-0.05	0.965936	0.337086	0.697639	-0.07	0.952638	0.279368	0.711408	0.004	1.00278	0.941244	0.990246
ASF1A	NM_014034.1	7560048	ILMN_1714737	6	0.108	1.07773	0.476462	0.86996	-0.056	0.961927	0.455401	0.787255	-0.117	0.922103	0.128075	0.513052	-0.164	0.892547	0.251416	0.714977
ASF1B	NM_018154.2	2630673	ILMN_1695414	19	0.002	1.00139	0.987448	0.997548	-0.384	0.76631	0.005201	0.0379	-0.172	0.887611	0.174613	0.59017	-0.386	0.765248	0.000502	0.018199
ASFMR1	NR_024502.1	2000672	ILMN_3259153	X	0.015	1.01045	0.768007	0.95392	0.015	1.01045	0.80306	0.946058	-0.021	0.985549	0.661589	0.91621	0	1	0.997668	0.999477
ASGR1	NM_001671.2	2370064	ILMN_1769013	17	0.176	1.12975	0.012111	0.207362	0.411	1.32961	0.002183	0.018818	0.075	1.05336	0.280247	0.712393	0.235	1.17691	0.073409	0.419666
ASGR2	NM_080912.2	1030386	ILMN_1700340	17	-0.049	0.966606	0.286618	0.760793	-0.018	0.987601	0.776507	0.937571	-0.018	0.987601	0.714469	0.933741	0.031	1.02172	0.655204	0.929915
ASGR2	NM_080914.1	3800576	ILMN_2342638	17	0.001	1.00069	0.990463	0.998122	-0.022	0.984866	0.723233	0.918767	0.002	1.00139	0.97103	0.994361	-0.023	0.984184	0.677856	0.935977
ASGR2	NM_080914.1	4860753	ILMN_1694966	17	0.049	1.03455	0.297692	0.769053	0.044	1.03097	0.377169	0.730778	0.026	1.01819	0.602456	0.897396	-0.005	0.99654	0.905224	0.984922
ASH1L	NM_018489.2	4810239	ILMN_1782032	1	0.138	1.10038	0.042264	0.38503	0.098	1.07029	0.051022	0.23089	0.116	1.08373	0.03985	0.263632	-0.04	0.972655	0.493483	0.868417
ASH2L	NM_004674.2	3440348	ILMN_1666933		-0.083	0.944092	0.211001	0.699365	-0.69	0.619854	1e-06	4.8e-05	-0.194	0.874179	0.008886	0.094218	-0.607	0.656561	2.9e-05	0.003344
ASIP	NM_001672.2	3460474	ILMN_1791647	20	0.039	1.0274	0.439541	0.853832	0.022	1.01537	0.665081	0.894743	0.04	1.02811	0.418106	0.811496	-0.017	0.988286	0.737443	0.951765
ASL	NM_001024943.1	6620598	ILMN_2379393	7	0.083	1.05922	0.280184	0.756736	0.012	1.00835	0.796264	0.943866	-0.158	0.896267	0.010483	0.105145	-0.071	0.951978	0.356922	0.797431
ASL	NM_001024944.1	4850681	ILMN_1685037	7	-0.133	0.911933	0.021401	0.278987	-0.127	0.915734	0.030616	0.157194	-0.12	0.920188	0.039973	0.264149	0.006	1.00417	0.889576	0.981572
ASL	NM_000048.3	1690128	ILMN_1685142	7	-0.058	0.960595	0.399787	0.830546	-0.038	0.974004	0.556513	0.845756	-0.012	0.991717	0.858793	0.9704	0.02	1.01396	0.637866	0.924656
ASMT	NM_004043.1	6220546	ILMN_1690595	YX	0.009	1.00626	0.862763	0.975656	-0.006	0.99585	0.899802	0.973803	0.025	1.01748	0.668412	0.918086	-0.016	0.988971	0.778746	0.959151
ASMTL	NM_004192.1	6760619	ILMN_1689786	XY	0.237	1.17854	0.295388	0.76693	0.372	1.29415	0.003244	0.025848	-0.223	0.856782	0.074306	0.385499	0.136	1.09885	0.481988	0.861944
ASMTL	XM_942506.1	1010349	ILMN_1732615		-0.348	0.785673	0.009314	0.179292	-0.3	0.812252	0.006203	0.043841	-0.197	0.872363	0.076566	0.391939	0.048	1.03383	0.63384	0.923811
ASMTL	NM_004192.2	430376	ILMN_1804384	Y	-0.437	0.738669	0.001625	0.068689	-0.358	0.780245	0.009423	0.061442	-0.118	0.921464	0.284447	0.715889	0.079	1.05629	0.429799	0.838791
ASNA1	NM_004317.2	4480435	ILMN_1657571	19	0.173	1.1274	0.00678	0.15151	0.014	1.00975	0.791329	0.942105	0.032	1.02243	0.777608	0.950339	-0.159	0.895646	0.008952	0.116034
ASNS	NM_133436.1	1510296	ILMN_1796417	7	-0.567	0.675019	0.056542	0.438799	-1.307	0.40416	5e-06	0.000176	-0.16	0.895025	0.314281	0.741439	-0.74	0.598739	0.012047	0.141488
ASNS	NM_133436.1	5960181	ILMN_2398107	7	-1.07	0.476319	0.001424	0.063717	-1.501	0.353308	0	6e-06	-0.11	0.926588	0.252009	0.683926	-0.431	0.741747	0.068576	0.406747
ASNSD1	NM_019048.1	6960242	ILMN_2221673	2	-0.339	0.790589	0.040791	0.378161	0.017	1.01185	0.863854	0.963962	0.29	1.22264	0.014689	0.133839	0.356	1.27987	0.00948	0.120172
ASPA	NM_000049.2	3140209	ILMN_1692824	17	0.031	1.02172	0.744206	0.94944	0.093	1.06659	0.220237	0.574397	-0.027	0.981459	0.724168	0.936209	0.061	1.04319	0.384961	0.814189
ASPG	NM_001080464.1	3710280	ILMN_3246037	14	-0.037	0.97468	0.519965	0.886474	0.002	1.00139	0.969933	0.991864	-0.063	0.957271	0.256882	0.688904	0.039	1.0274	0.416333	0.83091
ASPH	NM_004318.2	5890619	ILMN_1693771	8	-0.477	0.71847	0.00042	0.032964	-0.622	0.64977	1.5e-05	0.000387	-0.236	0.849096	0.007743	0.085299	-0.145	0.904379	0.214517	0.674356
ASPH	NM_032468.2	2370450	ILMN_2352934	8	-0.32	0.80107	0.001936	0.075059	-0.242	0.845572	0.005444	0.039304	-0.126	0.916369	0.12829	0.513493	0.077	1.05482	0.334345	0.782643
ASPH	NM_004318.2	6100746	ILMN_1739719	8	-0.071	0.951978	0.266779	0.746526	-0.086	0.942131	0.090505	0.342858	0.007	1.00486	0.884172	0.976562	-0.016	0.988971	0.799238	0.964304
ASPHD1	NM_181718.3	6420561	ILMN_1708950	16	0.03	1.02101	0.74889	0.95052	0.036	1.02527	0.713124	0.914664	-0.112	0.925304	0.237071	0.667887	0.006	1.00417	0.954876	0.992865
ASPHD1	NM_181718.3	1440088	ILMN_1662390	16	0.057	1.0403	0.322128	0.784782	0.106	1.07624	0.049116	0.224589	0.069	1.04899	0.184909	0.604188	0.049	1.03455	0.343125	0.788349
ASPHD1	NM_198907.1	7210703	ILMN_1662490	16	0.025	1.01748	0.720067	0.944457	0.041	1.02883	0.563479	0.849898	0.087	1.06216	0.233172	0.664083	0.016	1.01115	0.767665	0.957712
ASPHD2	NM_020437.3	7400102	ILMN_2167426	22	0.083	1.05922	0.149939	0.62725	0.095	1.06807	0.066259	0.277841	-0.166	0.89131	0.025338	0.19551	0.012	1.00835	0.813013	0.967145
ASPM	NM_018136.3	6130441	ILMN_1815184	1	0.351	1.27544	0.000228	0.02359	-0.575	0.671286	4e-06	0.000134	-0.629	0.646624	1e-06	0.000246	-0.926	0.526316	0	0.000308
ASPN	NM_017680.3	4050431	ILMN_2168166	9	-0.077	0.948027	0.214457	0.702715	0.022	1.01537	0.699017	0.909782	-0.004	0.997231	0.946123	0.989264	0.099	1.07103	0.137276	0.566836
ASPRV1	NM_152792.1	4860255	ILMN_1762284	2	0.041	1.02883	0.361349	0.808528	0.112	1.08073	0.026676	0.141074	0.086	1.06142	0.170284	0.584152	0.07	1.04972	0.149175	0.587458
ASPSCR1	NM_024083.2	6940484	ILMN_1660749	17	0.428	1.34537	0.063661	0.458262	0.244	1.18427	0.000462	0.005287	-0.134	0.911301	0.139744	0.534859	-0.183	0.880869	0.373799	0.807807
ASPSCR1	XM_001132706.1	1850307	ILMN_1688180		-0.123	0.918276	0.266072	0.746115	-0.19	0.876606	0.004621	0.034415	0.037	1.02598	0.587617	0.891952	-0.067	0.954621	0.54941	0.892902
ASPSCR1	XM_001132706.1	3420576	ILMN_1661860		0.013	1.00905	0.79819	0.960956	-0.04	0.972655	0.395172	0.745797	0.139	1.10114	0.052092	0.312375	-0.053	0.96393	0.321797	0.772769
ASRGL1	NM_025080.2	6770270	ILMN_1810199	11	0.134	1.09733	0.034647	0.350683	-0.202	0.869345	0.036153	0.178682	-0.201	0.869947	0.00487	0.060838	-0.336	0.792235	0.004824	0.077226
ASS1	NM_000050.4	4900370	ILMN_1688234	9	-0.131	0.913198	0.123579	0.585864	-0.004	0.997231	0.959807	0.989952	0.058	1.04102	0.435873	0.821334	0.127	1.09202	0.08763	0.45996
ASS1	NM_000050.4	110433	ILMN_1708778	9	-0.876	0.544876	0.000771	0.04524	-0.46	0.726986	5.6e-05	0.00103	0.515	1.42899	0.000427	0.010615	0.416	1.33422	0.039281	0.295817
ASS1	NM_054012.3	2640544	ILMN_2395451	9	-0.873	0.54601	0.001807	0.072881	-0.418	0.748461	0.004453	0.033405	0.566	1.48041	0.001023	0.01985	0.455	1.37078	0.045053	0.320555
ASTE1	NM_014065.2	6650026	ILMN_1803813	3	-0.034	0.976709	0.660215	0.92982	-0.059	0.959929	0.331521	0.692983	-0.186	0.87904	0.009835	0.100839	-0.025	0.982821	0.713104	0.945093
ASTL	NM_001002036.2	6400070	ILMN_1728055	2	0.094	1.06733	0.05483	0.434661	0.052	1.0367	0.268279	0.629905	-0.004	0.997231	0.932305	0.987249	-0.042	0.971307	0.306198	0.760957
ASTN1	NM_004319.1	1990333	ILMN_1684959	1	-0.095	0.936272	0.105102	0.556232	0.063	1.04464	0.229276	0.584912	-0.042	0.971307	0.434912	0.820983	0.158	1.11574	0.016385	0.171893
ASTN1	NM_207108.1	2710736	ILMN_1702189	1	0.07	1.04972	0.188399	0.67621	0.05	1.03526	0.338846	0.699182	0.069	1.04899	0.198713	0.621316	-0.02	0.986233	0.687698	0.938867
ASTN2	NM_198186.2	10703	ILMN_1744118	9	0.185	1.13682	0.047456	0.406464	0.676	1.5977	1e-06	3.9e-05	0.383	1.30405	4.9e-05	0.002449	0.491	1.40542	0.00074	0.023214
ASTN2	NM_198188.1	3120132	ILMN_1797283	9	0.118	1.08523	0.059342	0.446571	0.396	1.31585	4.2e-05	0.00082	0.269	1.20497	0.001726	0.028648	0.278	1.21251	0.000893	0.02604
ASTN2	NM_198187.2	4010358	ILMN_2381559	9	0.012	1.00835	0.79138	0.958711	0.201	1.14949	0.002349	0.020015	0.159	1.11651	0.008506	0.091126	0.189	1.13997	0.00249	0.049912
ASXL1	NM_015338.4	5390180	ILMN_1726025	20	0.116	1.08373	0.151149	0.628466	-0.246	0.843231	0.000621	0.00676	-0.215	0.861546	0.009467	0.098476	-0.362	0.778085	0.001323	0.033397
ASXL2	NM_018263.4	650075	ILMN_1698968	2	0.036	1.02527	0.79667	0.960691	-0.238	0.84792	0.029561	0.152919	-0.146	0.903753	0.148071	0.548047	-0.274	0.827023	0.033278	0.268289
ASXL3	NM_030632.1	2340133	ILMN_1736957	18	-0.032	0.978063	0.543562	0.894312	-0.06	0.959264	0.254349	0.615602	0.039	1.0274	0.479127	0.844884	-0.028	0.980779	0.548595	0.892374
ASZ1	NM_130768.1	1510431	ILMN_1782246	7	-0.081	0.945402	0.299359	0.769984	-0.075	0.949342	0.304922	0.668113	-0.003	0.997923	0.96591	0.993403	0.006	1.00417	0.881385	0.980041
ASZ1	NM_130768.1	1190274	ILMN_2048957	7	0.012	1.00835	0.782551	0.956811	0.075	1.05336	0.22614	0.581648	0.025	1.01748	0.660373	0.915691	0.064	1.04536	0.313629	0.766778
ATAD1	NM_032810.2	5260221	ILMN_1654497	10	-0.402	0.756808	0.040479	0.376886	-0.463	0.725476	0.000942	0.009522	-0.115	0.923382	0.221372	0.650799	-0.062	0.957935	0.687848	0.938924
ATAD1	NM_032810.2	5340551	ILMN_2169983	10	-0.421	0.746907	0.016504	0.244192	-0.39	0.76313	8.7e-05	0.001427	-0.02	0.986233	0.769506	0.9473	0.031	1.02172	0.811551	0.967037
ATAD2	NM_014109.2	1410242	ILMN_2048700	8	-0.388	0.764188	0.033559	0.346038	-1.198	0.435879	5e-06	0.000183	-0.297	0.813943	0.120983	0.500277	-0.81	0.570382	1.6e-05	0.002581
ATAD2B	NM_017552.1	1230131	ILMN_3235282	2	0.04	1.02811	0.552662	0.898125	-0.004	0.997231	0.935012	0.983913	-0.053	0.96393	0.324178	0.74818	-0.044	0.969962	0.503796	0.873553
ATAD3A	NM_018188.2	4150086	ILMN_1738530	1	0.277	1.21167	0.146797	0.623007	-0.035	0.976032	0.826005	0.953362	-0.307	0.808321	0.081423	0.405159	-0.312	0.805524	0.006839	0.096526
ATAD3B	NM_031921.4	7330091	ILMN_2131936	1	-0.035	0.976032	0.596095	0.912506	-0.095	0.936272	0.194798	0.538603	-0.144	0.905006	0.04859	0.29888	-0.06	0.959264	0.401355	0.822902
ATAD3C	NM_001039211.1	540296	ILMN_2231569	1	-0.03	0.97942	0.533716	0.890762	-0.026	0.98214	0.604663	0.868323	-0.01	0.993092	0.820168	0.961832	0.004	1.00278	0.940401	0.990163
ATAD5	NM_024857.3	2120592	ILMN_1806956	17	0.042	1.02954	0.468233	0.865991	0.005	1.00347	0.928016	0.982205	0.041	1.02883	0.489258	0.850033	-0.038	0.974004	0.490107	0.867086
ATCAY	NM_033064.3	7050577	ILMN_1656576	19	-0.036	0.975355	0.456042	0.861626	-0.067	0.954621	0.319624	0.681678	0.065	1.04608	0.210132	0.634973	-0.032	0.978063	0.630912	0.922605
ATE1	NM_007041.2	6770243	ILMN_1756867	10	-0.054	0.963262	0.290782	0.763827	-0.233	0.850864	0.003891	0.029806	-0.062	0.957935	0.518202	0.863268	-0.178	0.883928	0.014396	0.15823
ATE1	NM_007041.2	3520427	ILMN_1812479	10	-0.139	0.908148	0.117035	0.576438	-0.16	0.895025	0.039269	0.19036	-0.043	0.970634	0.599103	0.896041	-0.021	0.985549	0.752318	0.954639
ATE1	NM_001001976.1	460731	ILMN_1791400	10	0.067	1.04754	0.181153	0.667989	-0.008	0.99447	0.871624	0.965902	0.016	1.01115	0.764014	0.946241	-0.076	0.948684	0.132637	0.558184
ATE1	NM_007041.2	4150626	ILMN_2381769	10	0.018	1.01255	0.722192	0.944946	-0.039	0.973329	0.51118	0.820985	0.045	1.03168	0.492963	0.851499	-0.057	0.961261	0.318464	0.770502
ATF1	NM_005171.3	7200575	ILMN_1801923	12	-0.318	0.802181	0.033319	0.345214	0.105	1.07549	0.120153	0.409465	0.419	1.337	0.000615	0.013796	0.423	1.34071	0.00512	0.080285
ATF2	NM_001880.2	2100735	ILMN_1748271	2	0.024	1.01677	0.732497	0.947267	0.058	1.04102	0.267367	0.629152	0.179	1.1321	0.004245	0.054909	0.034	1.02385	0.652061	0.929029
ATF3	NM_001040619.1	4780128	ILMN_2374865	1	0.914	1.88426	1.4e-05	0.004987	2.219	4.65571	0	0	1.715	3.28297	0	0	1.305	2.47084	3e-06	0.001015
ATF3	NM_001030287.2	6380735	ILMN_1661109	1	-0.002	0.998615	0.971692	0.995109	-0.006	0.99585	0.903475	0.975121	-0.045	0.96929	0.332149	0.755483	-0.005	0.99654	0.931859	0.989275
ATF3	NM_001040619.1	6560575	ILMN_1791346	1	-0.023	0.984184	0.634249	0.924196	0.032	1.02243	0.538099	0.8362	-0.021	0.985549	0.656948	0.915194	0.054	1.03814	0.316828	0.769075
ATF4	NM_001675.2	3460309	ILMN_1672128	22	0.267	1.2033	0.179684	0.66587	-0.671	0.628071	0.001526	0.014063	-0.08	0.946058	0.61349	0.901361	-0.938	0.521956	3.9e-05	0.003863
ATF4	NM_001675.2	6480053	ILMN_1783394	22	0.147	1.10726	0.065487	0.463984	-0.012	0.991717	0.79524	0.943526	0.002	1.00139	0.966365	0.993403	-0.159	0.895646	0.046919	0.328381
ATF4	NM_182810.1	7610187	ILMN_2358457	22	0.249	1.18838	0.179836	0.666052	-0.82	0.566442	0.000145	0.002111	0.002	1.00139	0.991582	0.998653	-1.07	0.476319	2e-06	0.000811
ATF5	NM_012068.3	1570484	ILMN_1669113	19	0.439	1.35566	0.002568	0.08919	0.454	1.36983	1.6e-05	0.000398	-0.086	0.942131	0.147663	0.547539	0.015	1.01045	0.882619	0.980413
ATF6	NM_007348.2	5420343	ILMN_1703471	1	-0.148	0.902501	0.502628	0.880224	-0.648	0.638164	5e-05	0.000934	-0.12	0.920188	0.211578	0.637082	-0.5	0.707107	0.040674	0.301976
ATF6B	NM_004381.4	4640110	ILMN_3194911	6	-0.015	0.989657	0.778275	0.955695	-0.201	0.869947	0.003288	0.026118	-0.085	0.942785	0.138034	0.532504	-0.186	0.87904	0.004819	0.077221
ATF6B	NM_001136153.1	1780360	ILMN_3273641	6	0.018	1.01255	0.727806	0.946873	-0.049	0.966606	0.411066	0.75736	-0.006	0.99585	0.921288	0.984487	-0.067	0.954621	0.234405	0.695778
ATF7	NM_006856.1	1500400	ILMN_1706967	12	0.009	1.00626	0.890663	0.979986	0.084	1.05995	0.195343	0.53948	0.222	1.16635	0.00787	0.086379	0.075	1.05336	0.128881	0.551324
ATF7IP	NM_018179.3	2570682	ILMN_1716435	12	-0.035	0.976032	0.466214	0.865334	-0.063	0.957271	0.212036	0.563192	0.026	1.01819	0.614122	0.901425	-0.028	0.980779	0.582323	0.906216
ATF7IP2	NM_024997.2	2480075	ILMN_1804445	16	0	1	0.994882	0.999198	0.15	1.10957	0.022424	0.123084	0.075	1.05336	0.180749	0.599388	0.15	1.10957	0.087875	0.460577
ATG10	NM_031482.3	20050	ILMN_1748968	5	0.022	1.01537	0.768269	0.95392	-0.045	0.96929	0.510383	0.820436	-0.237	0.848508	0.013389	0.125368	-0.066	0.955283	0.335947	0.783334
ATG10	NM_031482.3	5340603	ILMN_2206098	5	-0.04	0.972655	0.540208	0.892813	-0.173	0.886996	0.005216	0.037984	-0.139	0.908148	0.03666	0.250407	-0.133	0.911933	0.052017	0.348362
ATG12	NM_004707.2	5720142	ILMN_1673898	5	-0.253	0.83915	0.027679	0.316748	-0.055	0.962594	0.541114	0.837966	0.227	1.1704	0.04613	0.289318	0.198	1.14711	0.003498	0.06244
ATG12	NM_004707.2	1410348	ILMN_2188204	5	-0.718	0.60794	0.006965	0.154408	-0.289	0.818469	0.028728	0.149547	0.447	1.3632	0.001672	0.028078	0.429	1.3463	0.059603	0.375249
ATG16L1	NM_030803.5	2760491	ILMN_1725707	2	-0.353	0.782954	0.001658	0.069652	-0.272	0.828171	0.003201	0.025577	-0.021	0.985549	0.752382	0.943928	0.08	1.05702	0.372338	0.807044
ATG16L1	NM_017974.3	3420347	ILMN_2365881	2	-0.273	0.827597	0.041319	0.380962	-0.338	0.791137	0.001521	0.014026	-0.018	0.987601	0.845758	0.967607	-0.065	0.955945	0.458292	0.851935
ATG16L2	NM_033388.1	2000307	ILMN_1664644	11	0.041	1.02883	0.459282	0.863101	0.036	1.02527	0.485243	0.805244	0.013	1.00905	0.817137	0.961472	-0.005	0.99654	0.911131	0.985785
ATG2A	NM_015104.1	4200008	ILMN_1756006	11	0.034	1.02385	0.712531	0.94287	0.047	1.03311	0.337277	0.697736	-0.192	0.875391	0.003438	0.046815	0.014	1.00975	0.877765	0.979209
ATG2B	NM_018036.5	4780762	ILMN_1735006	14	0.004	1.00278	0.945894	0.991151	-0.015	0.989657	0.791695	0.942338	0.07	1.04972	0.296663	0.726801	-0.019	0.986917	0.754755	0.955394
ATG3	NM_022488.3	1690253	ILMN_2163732	3	-0.059	0.959929	0.302128	0.772214	-0.062	0.957935	0.405585	0.753574	-0.048	0.967276	0.514072	0.860849	-0.003	0.997923	0.970025	0.995237
ATG3	NM_022488.3	830035	ILMN_1769566	3	-0.249	0.841479	0.001023	0.053248	-0.177	0.88454	0.00902	0.059326	0.041	1.02883	0.650363	0.912947	0.072	1.05117	0.228084	0.687586
ATG4A	NM_178271.1	5290370	ILMN_1768960	X	-0.055	0.962594	0.241602	0.72692	-0.083	0.944092	0.102178	0.371634	0.015	1.01045	0.770866	0.947943	-0.028	0.980779	0.519484	0.880441
ATG4A	NM_178270.1	620168	ILMN_2313782	X	-0.001	0.999307	0.993527	0.998847	0.331	1.25788	5.5e-05	0.00101	0.405	1.32409	6.7e-05	0.002986	0.332	1.25876	0.015721	0.167464
ATG4A	NM_178270.1	6060358	ILMN_3307158	X	0.01	1.00696	0.944733	0.990915	0.318	1.2466	0.007302	0.050009	0.457	1.37268	0.00012	0.004435	0.308	1.23799	0.083157	0.447046
ATG4B	NM_013325.4	10348	ILMN_1691173	2	0.01	1.00696	0.879406	0.977827	0.072	1.05117	0.318123	0.680354	0.018	1.01255	0.77971	0.9508	0.061	1.04319	0.34692	0.790714
ATG4B	NM_178326.2	2060136	ILMN_2411915	2	-0.056	0.961927	0.616145	0.91893	0.277	1.21167	0.017472	0.100532	0.29	1.22264	0.043316	0.27801	0.333	1.25963	0.001769	0.040094
ATG4C	NM_032852.2	5090291	ILMN_1700923	1	-0.101	0.932386	0.202073	0.690566	-0.315	0.803851	0.002632	0.021961	-0.357	0.780786	0.000514	0.012136	-0.214	0.862144	0.047912	0.332
ATG4C	NM_032852.2	2970528	ILMN_2383727	1	-0.013	0.99103	0.748738	0.95052	-0.055	0.962594	0.274661	0.635947	-0.012	0.991717	0.819761	0.961832	-0.041	0.971981	0.363708	0.801356
ATG4D	NM_032885.4	730767	ILMN_2180315	19	-0.033	0.977386	0.428183	0.847151	0.012	1.00835	0.782275	0.939047	0.263	1.19997	0.00057	0.013079	0.046	1.0324	0.317672	0.769819
ATG4D	NM_032885.4	1450647	ILMN_1801905	19	-0.167	0.890693	0.096754	0.537698	0.01	1.00696	0.869012	0.96525	0.512	1.42603	0.000141	0.004896	0.178	1.13131	0.049219	0.337114
ATG5	NM_004849.1	2030228	ILMN_1718265	6	0.108	1.07773	0.043811	0.392168	0.058	1.04102	0.490022	0.807845	-0.232	0.851454	0.000934	0.018536	-0.05	0.965936	0.584981	0.90689
ATG7	NM_006395.1	5220754	ILMN_1790978	3	0.172	1.12662	0.227662	0.714872	-0.258	0.836246	0.001076	0.010588	-0.201	0.869947	0.01666	0.145585	-0.43	0.742262	0.010305	0.127416
ATG9A	NM_001077198.1	3890528	ILMN_1739008	2	-0.11	0.926588	0.097587	0.53946	-0.111	0.925946	0.104494	0.37717	-0.101	0.932386	0.130385	0.517384	-0.001	0.999307	0.986912	0.998196
ATG9A	NM_001077198.1	1850605	ILMN_2296290	2	-0.018	0.987601	0.729964	0.946873	-0.042	0.971307	0.544649	0.840058	0.008	1.00556	0.901317	0.980243	-0.025	0.982821	0.709736	0.94408
ATG9A	NM_001077198.1	3190326	ILMN_2410975	2	-0.23	0.852635	0.063421	0.457592	-0.226	0.855002	0.004236	0.031993	0.03	1.02101	0.707245	0.931651	0.004	1.00278	0.970794	0.995237
ATG9B	NM_173681.4	2570204	ILMN_1734655	7	-0.058	0.960595	0.233563	0.720292	0.004	1.00278	0.94297	0.985192	-0.036	0.975355	0.471858	0.841136	0.062	1.04391	0.172742	0.623085
ATHL1	NM_025092.3	4070239	ILMN_1794707	11	0.019	1.01326	0.823884	0.967633	-0.067	0.954621	0.204384	0.552076	-0.04	0.972655	0.433858	0.820178	-0.086	0.942131	0.334343	0.782643
ATIC	NM_004044.4	1770546	ILMN_1673991	2	-0.201	0.869947	0.019887	0.270123	-0.532	0.691595	1.3e-05	0.000347	-0.279	0.824162	0.008479	0.090936	-0.331	0.794985	0.000212	0.010597
ATL1	NM_181598.3	2680475	ILMN_3181411	14	-0.032	0.978063	0.572556	0.905526	0.009	1.00626	0.85994	0.963351	-0.137	0.909408	0.025876	0.198369	0.04	1.02811	0.429763	0.838791
ATL1	NM_015915.4	990192	ILMN_3255124	14	-0.048	0.967276	0.26746	0.747141	-0.071	0.951978	0.295667	0.657963	0.067	1.04754	0.222656	0.651845	-0.023	0.984184	0.740215	0.952384
ATL2	NM_022374.1	2850494	ILMN_1716384	2	-0.199	0.871154	0.063056	0.456144	0.003	1.00208	0.966624	0.991313	0.153	1.11188	0.05605	0.326593	0.202	1.15029	0.063365	0.388349
ATL3	NM_015459.3	1240243	ILMN_1751086	11	-0.82	0.566442	1.5e-05	0.005027	-0.447	0.733567	6e-06	0.000188	0.476	1.39088	4.8e-05	0.002412	0.373	1.29504	0.002142	0.045452
ATM	NM_000051.3	6840605	ILMN_1779214	11	0.077	1.05482	0.147089	0.623032	-0.035	0.976032	0.529358	0.831848	-0.116	0.922742	0.090046	0.428232	-0.112	0.925304	0.039579	0.297164
ATM	NM_138292.3	7330592	ILMN_1716231	11	-0.026	0.98214	0.531408	0.890031	-0.004	0.997231	0.927191	0.98212	-0.043	0.970634	0.383119	0.790327	0.021	1.01466	0.63881	0.92505
ATM	NM_000051.3	580537	ILMN_1713630	11	-0.039	0.973329	0.505609	0.881147	-0.004	0.997231	0.944603	0.985875	-0.014	0.990343	0.801767	0.957973	0.035	1.02456	0.466283	0.855399
ATM	NM_000051.3	4250008	ILMN_2370825	11	0.147	1.10726	0.008928	0.175994	-0.032	0.978063	0.471328	0.796522	-0.008	0.99447	0.848411	0.968359	-0.179	0.883315	0.002873	0.054878
ATMIN	NM_015251.2	6620600	ILMN_2223720	16	-0.238	0.84792	0.137156	0.608201	-0.397	0.759436	0.001716	0.015415	-0.374	0.77164	0.013519	0.126297	-0.159	0.895646	0.178424	0.630387
ATMIN	NM_015251.2	1050180	ILMN_1772540	16	-0.112	0.925304	0.191933	0.679194	-0.372	0.772711	0.001217	0.011679	-0.352	0.783497	0.000732	0.015679	-0.26	0.835088	0.016703	0.173778
ATN1	NM_001007026.1	4390543	ILMN_1737833	12	-0.077	0.948027	0.582164	0.908762	-0.421	0.746907	4.2e-05	0.000811	-0.011	0.992404	0.822549	0.961993	-0.344	0.787854	0.038053	0.290074
ATN1	NM_001007026.1	6580040	ILMN_1711210	12	0.023	1.01607	0.648197	0.927919	-0.082	0.944747	0.130838	0.432029	0	1	0.999796	0.999888	-0.105	0.929805	0.037785	0.288849
ATN1	NM_001940.3	4220754	ILMN_2373830	12	-0.055	0.962594	0.421056	0.842865	-0.169	0.889459	0.024681	0.132702	0.15	1.10957	0.139436	0.534512	-0.114	0.924023	0.031562	0.259403
ATOH1	NM_005172.1	6660129	ILMN_1740671	4	-0.009	0.993781	0.82842	0.96905	-0.011	0.992404	0.807895	0.947836	-0.012	0.991717	0.795781	0.956304	-0.002	0.998615	0.958688	0.993424
ATOH7	NM_145178.2	5690092	ILMN_2168228	10	0.021	1.01466	0.706381	0.941201	0.003	1.00208	0.952437	0.988199	-0.035	0.976032	0.496517	0.852815	-0.018	0.987601	0.713499	0.945093
ATOH7	NM_145178.2	4480047	ILMN_1752393	10	0.006	1.00417	0.895756	0.981041	0.004	1.00278	0.932112	0.983052	0.032	1.02243	0.55705	0.880483	-0.002	0.998615	0.967175	0.994375
ATOH8	NM_032827.4	3840376	ILMN_1654065	2	-0.006	0.99585	0.932014	0.988714	-0.01	0.993092	0.845549	0.958773	-0.055	0.962594	0.297897	0.727975	-0.004	0.997231	0.959076	0.993424
ATOX1	NM_004045.3	5560131	ILMN_1670609	5	-0.459	0.72749	0.00979	0.184302	0.013	1.00905	0.87211	0.965922	0.547	1.46104	0.003116	0.04367	0.472	1.38703	0.008287	0.110219
ATP10A	NM_024490.2	1580717	ILMN_1813434	15	0.007	1.00486	0.900692	0.981617	0.002	1.00139	0.979329	0.994602	-0.008	0.99447	0.8941	0.978667	-0.005	0.99654	0.936073	0.989729
ATP10A	NM_024490.3	1580301	ILMN_3307935	15	0.164	1.12039	0.068845	0.474108	0.188	1.13918	0.027922	0.146397	0.117	1.08448	0.135199	0.527417	0.024	1.01677	0.720187	0.946353
ATP10B	NM_025153.2	4730180	ILMN_1698804	5	0.058	1.04102	0.200951	0.68958	0.069	1.04899	0.166745	0.495842	0.114	1.08222	0.027638	0.207681	0.011	1.00765	0.812775	0.967145
[truncated: 45,310 more rows]
[truncated: 1 more columns]
