# Supplementary material for: Prosurvival long noncoding RNA PINCR regulates a subset of p53 targets in human colorectal cancer cells by binding to Matrin 3
Source: eLife journal article supplement (doi:10.7554/elife.23244), 2017-06-05
Supplement: supp [file elife-23244-supp-v1.zip › elife_poa_e23244_Supplementary_File_4.xls]

## Sheet: Supplementary File 4
Supplementary File 4. Mass spectrometry analysis from RNA pulldowns. PSM refers to peptide-spectrum match. Proteins enrcihed at least 2-fold in the PINCR pulldowns as compared to Luciferase pulldowns under untreated condition (Unt) and Doxorubicin treatment (DOXO) are shown. To obtain a non-zero fold change a value of "1" was assigned to the PSM if it was zero.
Gene Symbol	Group Description	# PSMs - Luc Unt	# PSMs - Luc DOXO	# PSMs - PINCR Unt	# PSMs - PINCR DOXO	Fold enrichment: PINCR Unt/Luc Unt	Fold enrichment: PINCR DOXO/Luc DOXO
MATR3	Matrin-3	2	2	16	32	8	16
CPSF1	Cleavage and polyadenylation specificity factor subunit 1	1	1	2	14	2	14
THRAP3	Thyroid hormone receptor-associated protein 3	1	1	4	8	4	8
BCLAF1	Bcl-2-associated transcription factor 1	1	1	2	7	2	7
MYBBP1A	Myb-binding protein 1A	1	1	3	6	3	6
PTBP1	Polypyrimidine tract-binding protein 1	1	1	2	5	2	5
SF3B2	Splicing factor 3B subunit 2	3	6	6	21	2	3.5
NUMA1	Nuclear mitotic apparatus protein 1	2	7	6	22	3	3.14286
TCERG1	Transcription elongation regulator 1	1	2	3	6	3	3
SUPT16H	FACT complex subunit SPT16	1	2	2	5	2	2.5
PRPF19	Pre-mRNA-processing factor 19	1	4	4	10	4	2.5
