# Supplementary material for: Prosurvival long noncoding RNA PINCR regulates a subset of p53 targets in human colorectal cancer cells by binding to Matrin 3
Source: eLife journal article supplement (doi:10.7554/elife.23244), 2017-06-05
Supplement: supp [file elife-23244-supp-v1.zip › elife_poa_e23244_Supplementary_File_5.xls]

## Sheet: Supplementary File 5
Supplementary File 5. Sequence of primers.
BTG2-FP	AGCGAGCAGAGGCTTAAGGT
BTG2-RP	GATGATGGGGTCCATCTTGT
GAPDH-FP	TGCACCACCAACTGCTTAGC
GAPDH-RP	GGCATGGACTGTGGTCATGAG
GPX1-FP	GAGAATGTGGCGTCCCTCT
GPX1-RP	CTCTTCGTTCTTGGCGTTCT
LOC643401-FP	CGTGTGAAAAGAACCCAGGTA
LOC643401-RP	CGCCTGGTAAAACAACCAGT
MALAT1-FP	GACGGAGGTTGAGATGAAGC
MALAT1-RP	ATTCGGGGCTCTGTAGTCCT
Matrin 3-FP	GGGTTTTACTGTAAGCTGTGTTCA
Matrin 3-RP	GTCTGCGTTCTTCTGCCAAT
PINCR-CRISPR_analysis-FP	CACCCCACAAGTGTTTACATCA
PINCR-CRISPR_analysis-RP	CCTGACAGAAGTGGGGAGAC
PINCR-qPCR-FP	CACAGGTGTTGATCCCTTCA
PINCR-qPCR-RP	CGTGATCAAAGGGTTCTTGC
PINCR-FL-FP	ATTCAATCTGTGAGGTGGATGCGTG
PINCR-T7-FL-FP	TCTGATGTCCTAATACGACTCACTATAGGGATTCAATCTGTGAGGTGGATGCGTG
PINCR-FL-RP	AAAGTTTTATTTGGTTCACAGTTCTG
PINCR-Promoter-FP	ACTTGAGGCCAGGAGTTCAA
PINCR-Promoter-RP	TAAGGAACGAATCCCCAGTG
PINCR Det FP	CTCTCCCTTGCTCCCTCTCT
PINCR S1-FP	ATGTGACATGCTTGCTCCAG
PINCR S1-RP	CATGATTCTGGTCGGTGGAT
Targeting vector Det RP	TGCCCTTGTCTTGTAGTTTCC
PUMA-FP	GACCTCAACGCACAGTACGAG
PUMA-RP	AGGAGTCCCATGATGAGATTGT
p21-FP	GGATTAGGGCTTCCTCTTGG
p21-RP	GACTCTCAGGGTCGAAAACG
RP11-134G8.8-FP	ACACTTCTTCCCCCACCTCT
RP11-134G8.8-RP	CGTGTTAGCCAGGTTGGTCT
RP11-347C18.3-FP	AGAGGCCATCTCCACATTCA
RP11-347C18.3-RP	AGCTGGGATGAGCTGAAGAG
RRM2B-FP	AACAGAAGCCTTGCCAGTTG
RRM2B-RP	TCAAAAGGATTTTCTGCCTGA
UBC-FP	GGTCTTGCCAGTGAGTGTCTT
UBC-RP	GATGGTCGTACCCTGTCTGAC
ChIP Primers
ChIP_NEG-FP	GTCTAACCTCATGGTTGCCACTGG
ChIP_NEG-RP	TCAAGCAGATGTTCGCGGTGATG
BTG2-p53RE-FP	CCCTGGACCTCCTGAAAAAC
BTG2-p53RE-RP	CAGGAGGCTGGAGAGGAAG
GPX1-p53RE-FP	CAGGAAAAGGCTGGAGAGTG
GPX1-p53RE-RP	CCAAACCCCACATCCTAACT
RRM2B-p53RE-FP	CCAGTTTCCGACTGACTCAA
RRM2B-p53RE-RP	AAACGGAAGTGGTGGAATTG
PINCR-p53RE-FP	CAACCACCCCACAAGTGTTT
PINCR-p53RE-RP	CACCACACACACAACCTGAA
PINCR-KO p53RE-FP	CACCCCACAAGTGTTTACATC
PINCR-KO #1 p53RE-RP	CCTGACAGAAGTGGGGAGAC
PINCR-KO #2 p53RE-RP	CAGGCATCTTTATGGCCTCT
p21-p53RE-FP	GTGGCTCTGATTGGCTTTCTG
p21-p53RE-RP	CTGAAAACAGGCAGCCCAAG
Enhancer Primers
BTG2-Enhancer-FP	CCCACCTTGGCAACAAGC
BTG2-Enhancer-RP	TTAATAGTTCTCGGCCAAACG
GPX1-Enhancer-FP	AGACGTGAGCCACTGCTCTT
GPX1-Enhancer-RP	TGGCATGCAAGCACATAACT
RRM2B-Enhancer-FP	GGTCTGTCTGTGGGAAGAGC
RRM2B-Enhancer-RP	CCAGCACGTGGTGTCTACAG
ASO sequences
CTL	TTCTACCTCGCGCGATTTAC
PINCR	GATCAGTTAGGGTCCTTAAA
