# Supplementary material for: Prosurvival long noncoding RNA PINCR regulates a subset of p53 targets in human colorectal cancer cells by binding to Matrin 3
Source: eLife journal article supplement (doi:10.7554/elife.23244), 2017-06-05
Supplement: supp [file elife-23244-supp-v1.zip › elife_poa_e23244_Supplementary_File_6.xls]

## Sheet: Supplementary File 6
Supplementary File 6. Sequence of guide RNAs.
	gRNA sequences
PINCR_5.1.1	GCCTGCTCACTGGAAGCAT	E5.1
PINCR_5.1.2	ATGCTTCCAGTGAGCAGGC
PINCR_3.1.1	GATCTCAGCCTTAAATATA	E3.1
PINCR_3.1.2	TATATTTAAGGCTGAGATC
gRNA for PINCR S1-tagging
PINCR sgRNA S	5’-CACCGATTTGGTTCACAGTTCTGT-3’
PINCR sgRNA AS	5’-AAACACAGAACTGTGAACCAAATC-3’
PINCR Targeting Vector S	5’- CACCGATTTGGTTCACAGTTCTGTAGG-3’
PINCR Targeting Vector AS	5’- ATCCCCTACAGAACTGTGAACCAAATC-3’
