# Supplementary figures and images for: Prosurvival long noncoding RNA PINCR regulates a subset of p53 targets in human colorectal cancer cells by binding to Matrin 3
Source: eLife journal article supplement (doi:10.7554/elife.23244), 2017-06-05

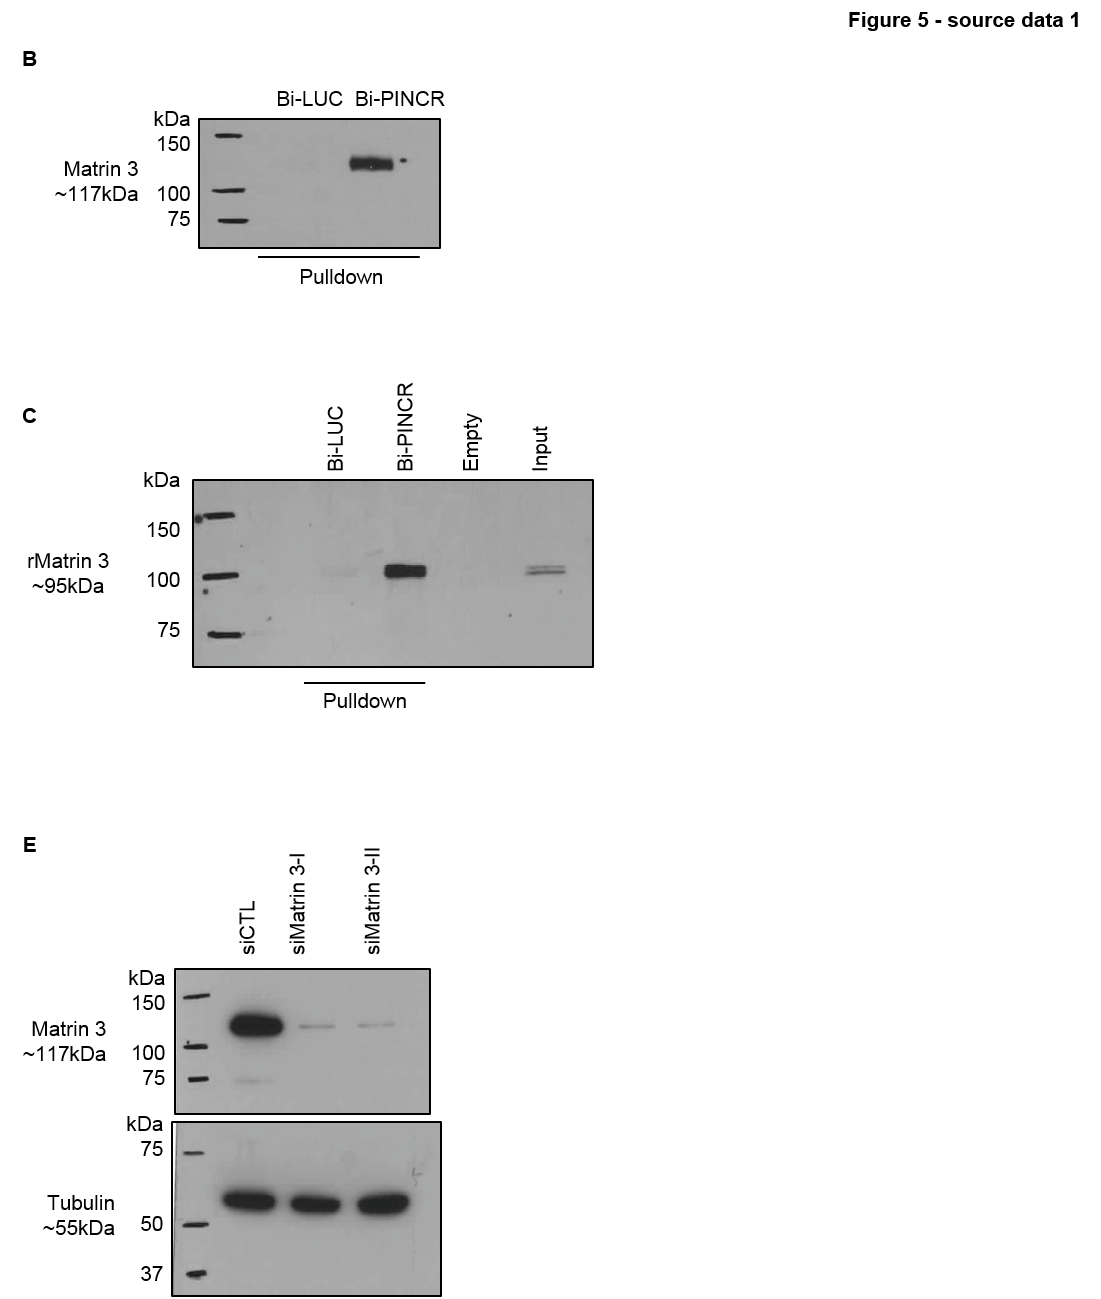

Supplement: supp [file elife-23244-supp-v1.zip › elife_poa_e23244_Figure_5_Source_Data_1.docx]

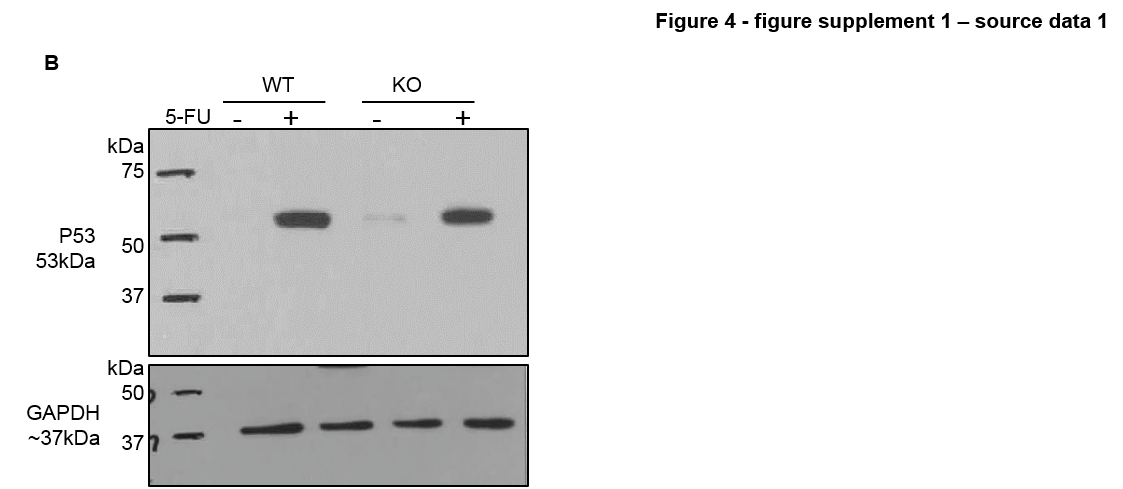

Supplement: supp [file elife-23244-supp-v1.zip › elife_poa_e23244_Figure_4_figure_supplement_1_Source_Data_1.docx]

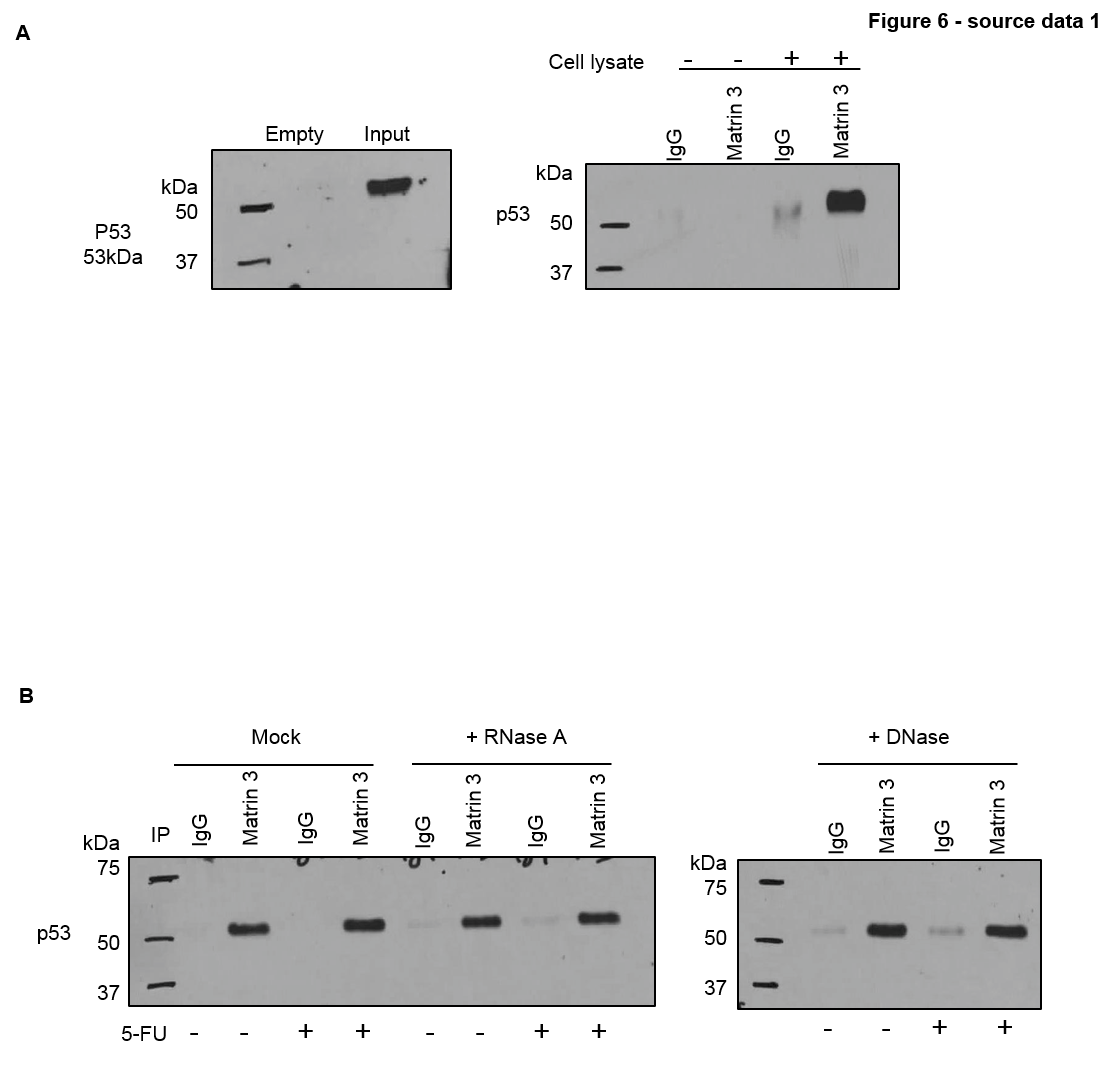

Supplement: supp [file elife-23244-supp-v1.zip › elife_poa_e23244_Figure_6_Source_Data_1.docx]

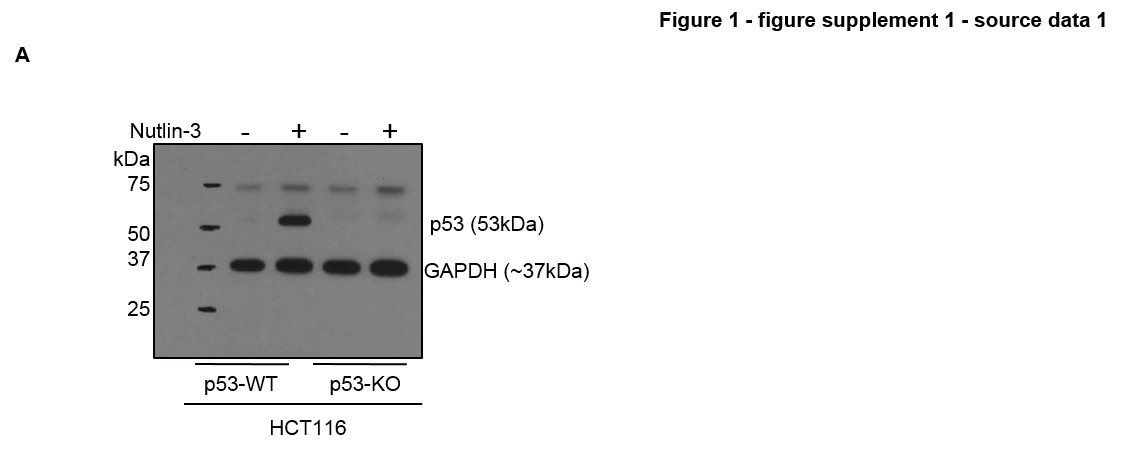

Supplement: supp [file elife-23244-supp-v1.zip › elife_poa_e23244_Figure_1_figure_supplement_1_Source_Data_1.docx]

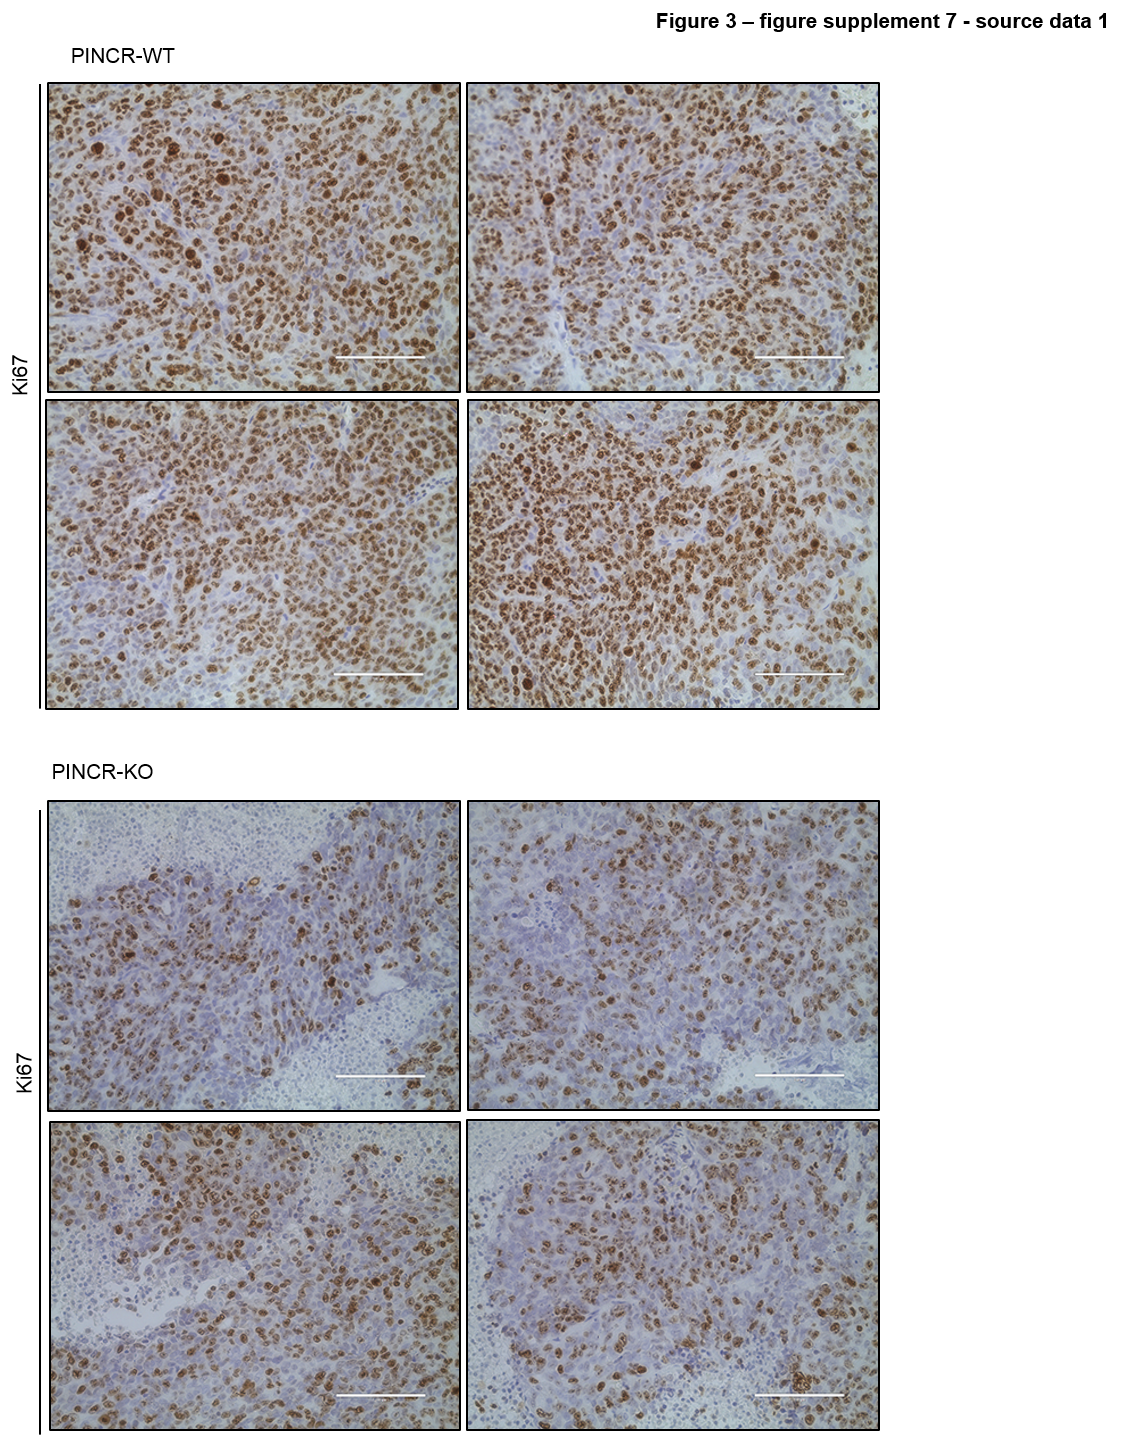

Supplement: supp [file elife-23244-supp-v1.zip › elife_poa_e23244_Figure_3_figure_supplement_7_Source_Data_1.docx]

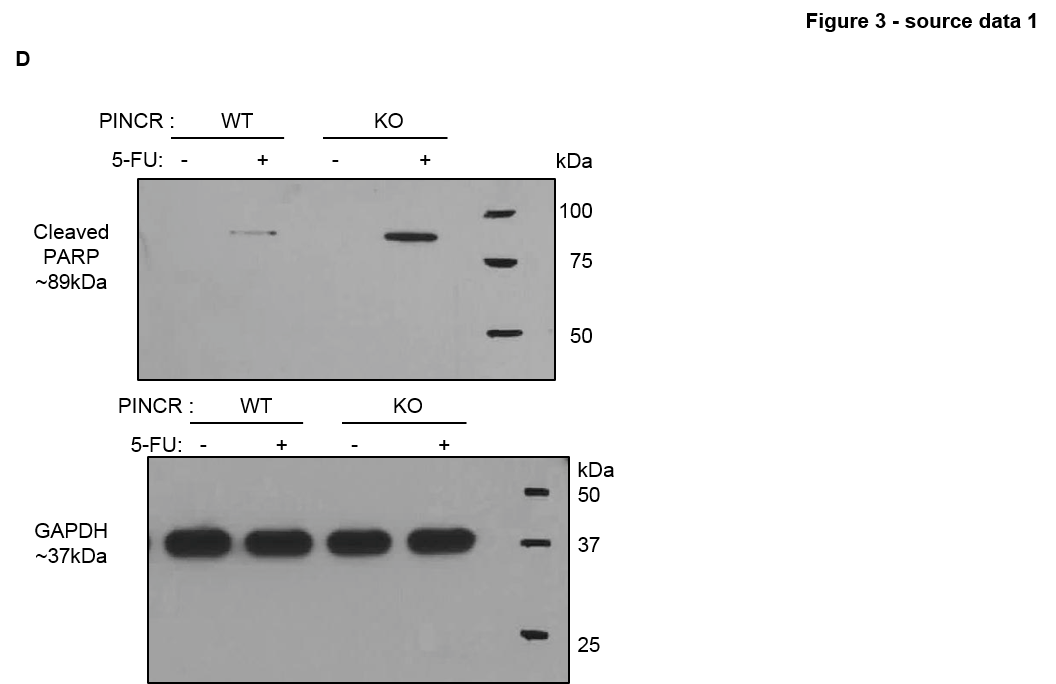

Supplement: supp [file elife-23244-supp-v1.zip › elife_poa_e23244_Figure_3_Source_Data_1.docx]

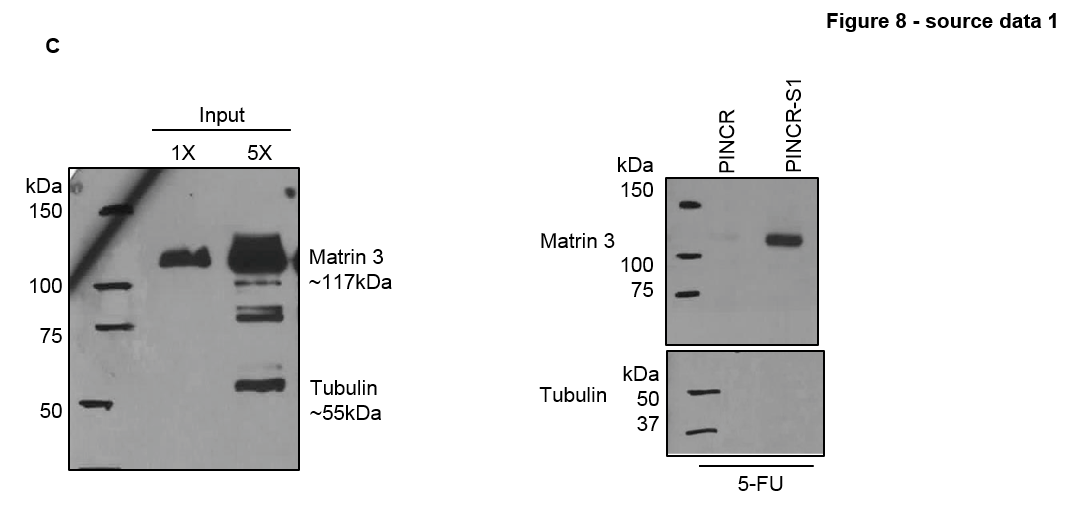

Supplement: supp [file elife-23244-supp-v1.zip › elife_poa_e23244_Figure_8_Source_Data_1.docx]

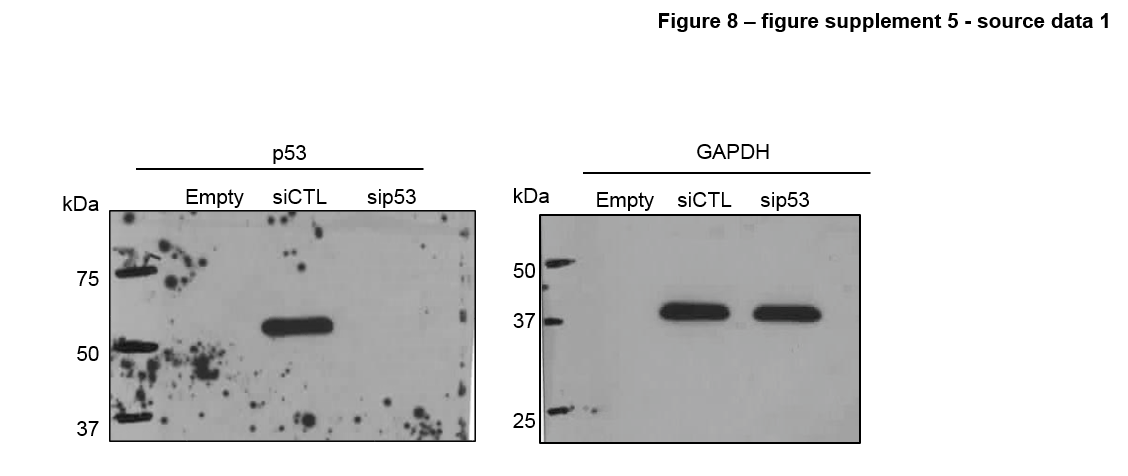

Supplement: supp [file elife-23244-supp-v1.zip › elife_poa_e23244_Figure_8_figure_supplement_5_Source_Data_1.docx]

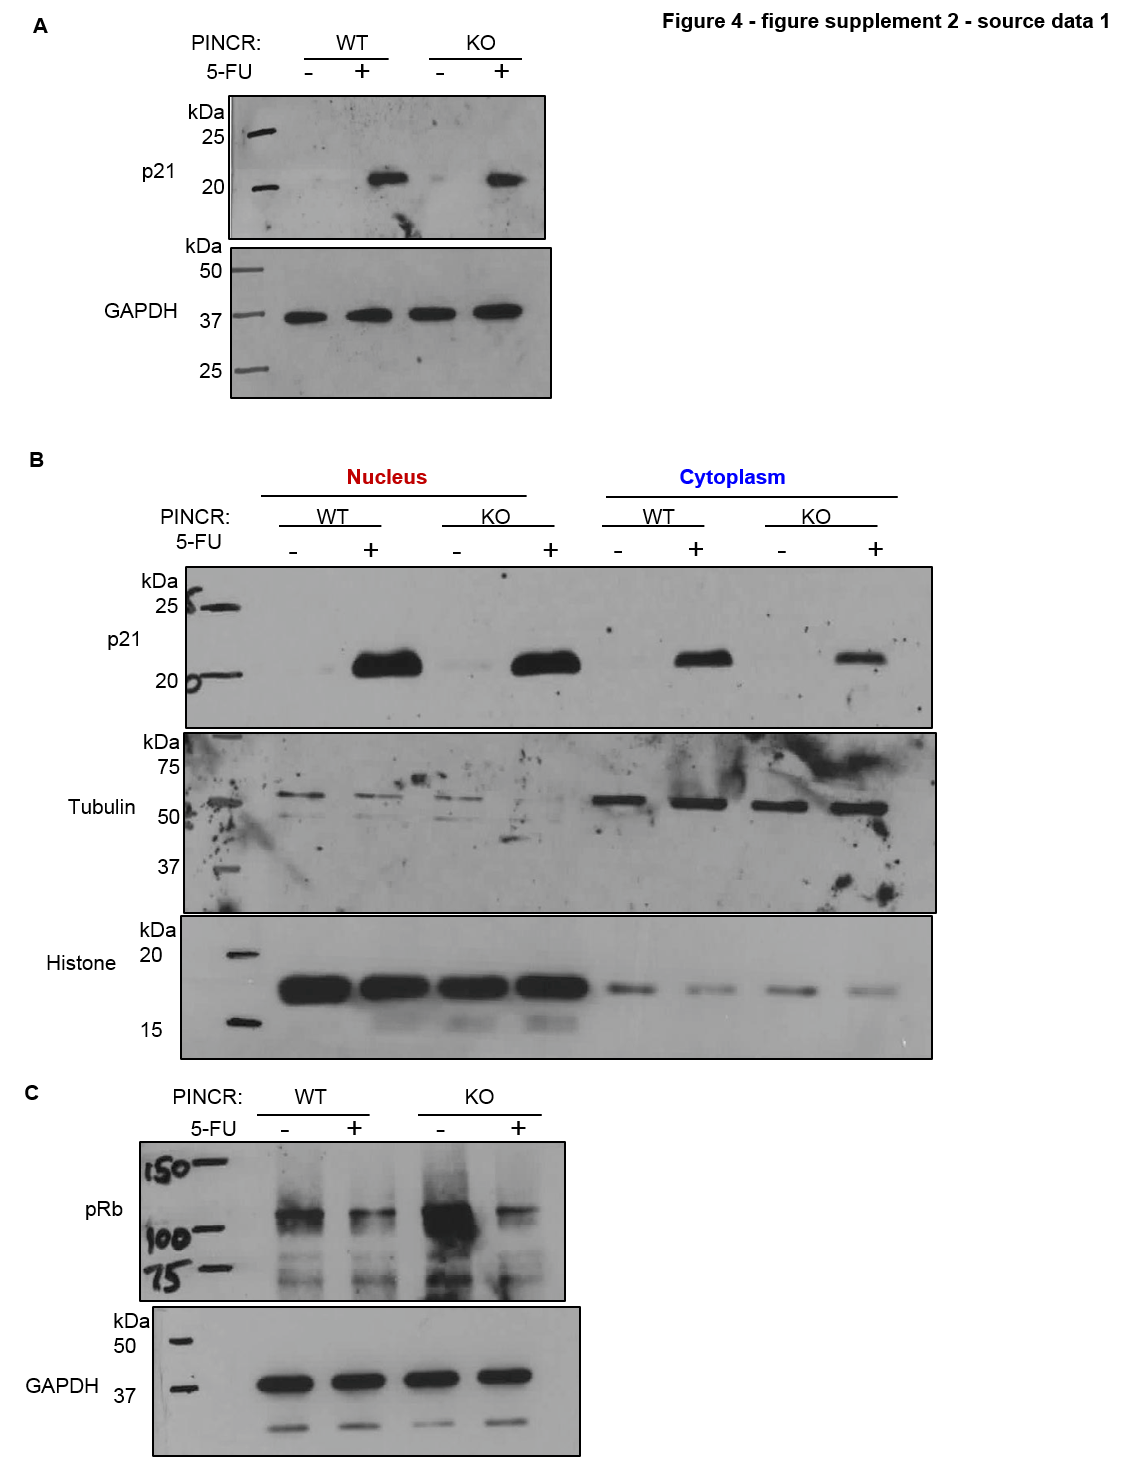

Supplement: supp [file elife-23244-supp-v1.zip › elife_poa_e23244_Figure_4_figure_supplement_2_Source_Data_1.docx]

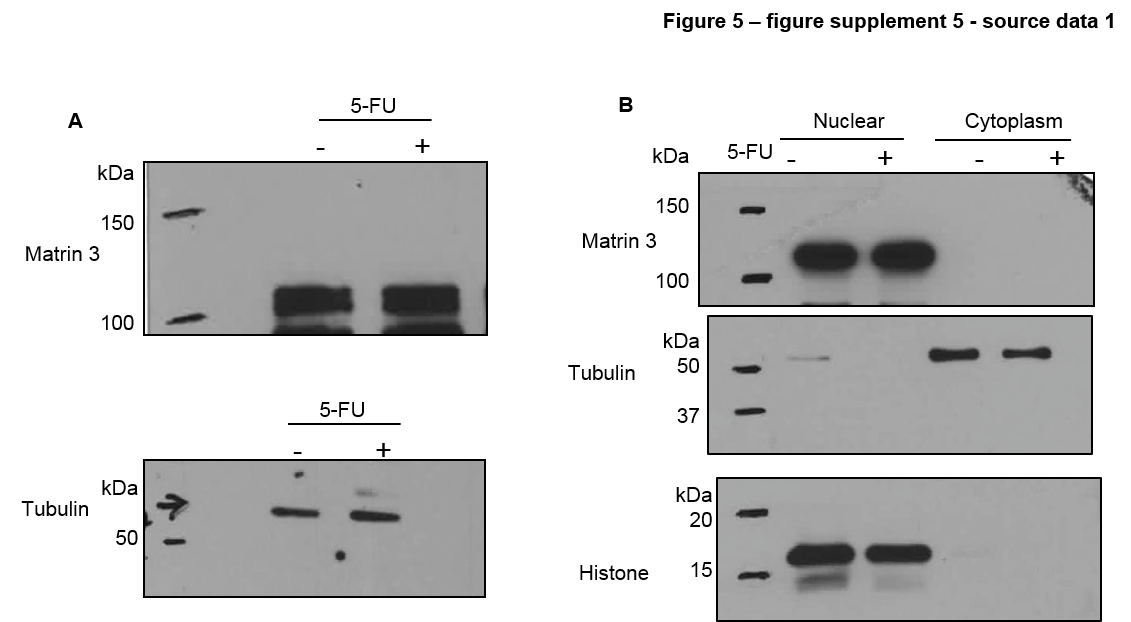

Supplement: supp [file elife-23244-supp-v1.zip › elife_poa_e23244_Figure_5_figure_supplement_5_Source_Data_1.docx]

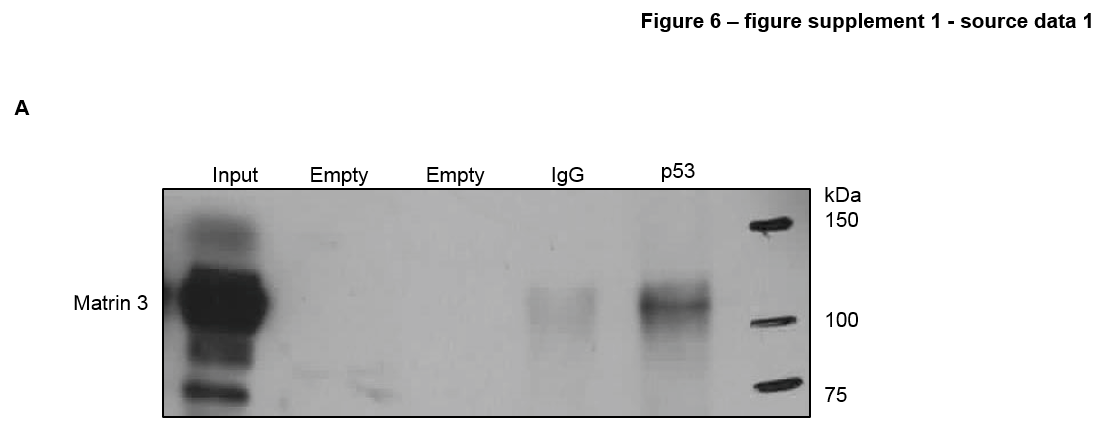

Supplement: supp [file elife-23244-supp-v1.zip › elife_poa_e23244_Figure_6_figure_supplement_1_Source_Data_1.docx]
